# Supplementary material for: Does NIH funding differ between medical specialties? A longitudinal analysis of NIH grant data by specialty and type of grant, 2011–2020
Source: PubMed Central journal article supplement — BMJ Open. 2022 Dec 29;12(12):e058191. doi: 10.1136/bmjopen-2021-058191 (PMC9809243; doi:10.1136/bmjopen-2021-058191), 2022-12-29
Supplement: bmjopen-2021-058191.draft_revisions.pdf [file bmjopen-2021-058191.draft_revisions.pdf]

# BMJ Open

BMJ Open is committed to open peer review. As part of this commitment we make the peer review history of every article we publish publicly available.

When an article is published we post the peer reviewers' comments and the authors' responses online. We also post the versions of the paper that were used during peer review. These are the versions that the peer review comments apply to.

The versions of the paper that follow are the versions that were submitted during the peer review process. They are not the versions of record or the final published versions. They should not be cited or distributed as the published version of this manuscript.

BMJ Open is an open access journal and the full, final, typeset and author-corrected version of record of the manuscript is available on our site with no access controls, subscription charges or pay-per-view fees (<http://bmjopen.bmj.com>).

If you have any questions on BMJ Open's open peer review process please email [info.bmjopen@bmj.com](mailto:info.bmjopen@bmj.com)

# BMJ Open

## Differential NIH Funding by Grant Types Among Medical Specialties

|                               |                                                                                                             |
|-------------------------------|-------------------------------------------------------------------------------------------------------------|
| Journal:                      | <i>BMJ Open</i>                                                                                             |
| Manuscript ID                 | bmjopen-2021-058191                                                                                         |
| Article Type:                 | Original research                                                                                           |
| Date Submitted by the Author: | 29-Jan-2022                                                                                                 |
| Complete List of Authors:     | Schlafly, Andrew; University of Pennsylvania Perelman School of Medicine,<br>Sebro, Ronnie A.; Mayo Clinic, |
| Keywords:                     | STATISTICS & RESEARCH METHODS, PUBLIC HEALTH, EDUCATION & TRAINING (see Medical Education & Training)       |
|                               |                                                                                                             |

SCHOLARONE™  
Manuscripts

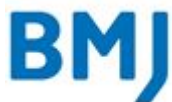

I, the Submitting Author has the right to grant and does grant on behalf of all authors of the Work (as defined in the below author licence), an exclusive licence and/or a non-exclusive licence for contributions from authors who are: i) UK Crown employees; ii) where BMJ has agreed a CC-BY licence shall apply, and/or iii) in accordance with the terms applicable for US Federal Government officers or employees acting as part of their official duties; on a worldwide, perpetual, irrevocable, royalty-free basis to BMJ Publishing Group Ltd ("BMJ") its licensees and where the relevant Journal is co-owned by BMJ to the co-owners of the Journal, to publish the Work in this journal and any other BMJ products and to exploit all rights, as set out in our [licence](#).

The Submitting Author accepts and understands that any supply made under these terms is made by BMJ to the Submitting Author unless you are acting as an employee on behalf of your employer or a postgraduate student of an affiliated institution which is paying any applicable article publishing charge ("APC") for Open Access articles. Where the Submitting Author wishes to make the Work available on an Open Access basis (and intends to pay the relevant APC), the terms of reuse of such Open Access shall be governed by a Creative Commons licence – details of these licences and which [Creative Commons](#) licence will apply to this Work are set out in our licence referred to above.

Other than as permitted in any relevant BMJ Author's Self Archiving Policies, I confirm this Work has not been accepted for publication elsewhere, is not being considered for publication elsewhere and does not duplicate material already published. I confirm all authors consent to publication of this Work and authorise the granting of this licence.

1  
2  
3 Differential NIH Funding by Grant Types Among Medical Specialties  
4  
5

6 Andrew Schlafly, A.B.  
7

8  
9 Perelman School of Medicine at the University of Pennsylvania  
10  
11  
12  
13

14  
15 Ronnie A. Sebro, M.D., Ph.D.  
16

17  
18 Mayo Clinic  
19

20  
21 4500 San Pablo Road S., Jacksonville, FL 32224  
22  
23

24 Email: [Sebro.Ronnie@Mayo.edu](mailto:Sebro.Ronnie@Mayo.edu)  
25  
26

27 The authors have no competing interests to disclose.  
28  
29  
30  
31  
32

33 Word Count of Manuscript Text: 3107  
34  
35  
36  
37  
38  
39  
40  
41  
42  
43  
44  
45  
46  
47  
48  
49  
50  
51  
52  
53  
54  
55  
56  
57  
58  
59  
60

## **Key Points**

**Question:** Does the current National Institute of Health (NIH) funding vary by specialty, and what are the temporal trends in funding by specialty from 2011 through 2020?

**Findings:** Systematic analysis of the NIH RePORTER data shows that NIH funding was distributed to 19 specialties. The most-funded specialty was Internal Medicine/Medicine, with \$36,023MM, followed by Psychiatry, with \$8,268MM, and Pediatrics, with \$7,897MM. When adjusted for the number of active physicians in each specialty, Pathology (\$50.4K/physician), Neurology (\$42.5K/physician), and Internal Medicine (\$30.0K/physician) were the most-funded specialties, whereas Plastic Surgery (\$0.1K in funding per active physician per year), Family Medicine (\$0.7K/physician), and Emergency Medicine (\$1.2K/physician) were the least-funded specialties. In addition, there were several instances where the mean dollar-amount awarded by grant-type was significantly different between specialties.

**Meaning:** NIH funding is not distributed, either in number or in dollar amount, in proportion to the active physician workforce. Training grants and awards are also not distributed in proportion to the active physician workforce. The reasons for these variations need to be explored further.

## Article Summary

### **Strengths and Limitations of this Study:**

- This study compares the funding levels across all specialties for which data is available in the NIH RePORTER, allowing for direct analysis of differences among many different specialties.
- This study considers several parameters to measure the level of funding by specialty, including the number of grants awarded, the total dollar-amount of grants awarded, and each of these values after adjustment for the number of active physicians in the specialty. The use of these various parameters allows for direct comparisons of whole specialties, as well as for size-adjusted comparisons.
- This study considers trends in funding across the ten-year time-period from 2011 through 2020, allowing for identification of specialties with increasing funding, and that of those with decreasing funding.
- This study is limited by a lack of access to data about applications for grants (e.g., data for applications that do not result in funding). Thus, for example, it does not allow for direct determination of the extent to which differences in funding-levels, by specialty, may be related to differences among the specialties in levels of grant-applications.

## **Abstract**

**Importance:** National Institutes of Health (NIH) funding is one of the major sources of research funding in the United States. Differences in NIH funding, across specialties, can impact the ability to diagnose and treat conditions in those specialties.

**Objective:** The aim of this study is to evaluate how NIH funding has been awarded by medical specialty. This study assesses differences and trends in the amount of funding, by specialty, for the years of 2011 through 2020, via a retrospective analysis of NIH RePORTER data.

**Data Source:** NIH RePORTER data from years 2011-2020, for awarded NIH grants (F32, T32, K01, K08, K23, R01, R03, R21, U01, P30) in the following medical specialties: Anesthesiology, Dermatology, Emergency Medicine, Family Medicine, Internal Medicine, Neurology, Neurosurgery, Obstetrics and Gynecology, Ophthalmology, Orthopedic Surgery, Otolaryngology, Pathology, Pediatrics, Physical Medicine and Rehabilitation, Plastic Surgery, Psychiatry, Radiation-Diagnostic/Oncology, Surgery, and Urology.

**Main Outcomes and Measures:** The following measures were studied: number of grants by specialty, number of grants per active physician by specialty, total dollar-amount of grants by specialty, dollar-amount of grants per active physician by specialty, and mean dollar-amount awarded by specialty for each grant-type. The hypothesis being tested (i.e., whether these measures varied across medical specialties) was formulated during data collection.

**Results:** In general, Internal Medicine/Medicine, Psychiatry, Pediatrics, Pathology, and Neurology received the most (F32, T32, K01, K08, K23, R01, R03, R21, U01, P30) grants per year, had the highest number of grants per active physician, had the highest total amounts of funding and the highest amount of funding per active physician, whereas fields like Emergency Medicine, Plastic Surgery, Orthopedics and Obstetrics and Gynecology had the lowest. The number of active physicians per grant was generally highest for Emergency Medicine, Plastic Surgery, General Surgery and Otolaryngology and again generally lower for Internal Medicine/Medicine, Pathology and Neurology. There were several instances where the mean dollar-amount awarded by grant-type was significantly different between specialties ( $P < 0.000292$ ).

**Conclusions and Relevance:** The data show that NIH funding varies significantly among medical specialties. This may affect research progress and the careers of scientists in less funded specialties.

## **Introduction**

The United States (US) National Institutes of Health (NIH) is a part of the US Department of Health and Human Services (HHS), and is the primary agency responsible for public health and biomedical research. The NIH is comprised of over 27 separate institutes and centers covering several biomedical disciplines and specialties in medicine (Appendix I). Approximately 80% of NIH funding goes towards funding extramural research in the form of research grants [1].

NIH funding is used for the advancement of research across many fields of basic science and clinical medicine [2]. In fiscal year 2020, the total NIH funding was \$40.3 billion. NIH funding research in clinical medicine is spread across many specialties, which vary in size. We hypothesized that the amount of funding for each specialty should be proportional to the number of active physicians in the specialty, as the number of active physicians can be viewed as a rough approximation of the demand for a specialty, and as a proxy for the disease burden (diseases treated by that specialty) in society.

We investigated whether NIH funding (the number of grants, number of active physicians per grant in that specialty, the dollar-amount of grants, dollar-amount of grants per active physician in that specialty, and grant-types) varies between specialties, between 2011 and 2020. We then evaluated which specialties were funded the most and which were funded the least in this period.

## **Methods**

This study was evaluated by the local Institutional Review Board (IRB). The study involves freely available, public data, and was determined to be exempt.

**Patient and Public Involvement Statement:** Neither patients nor members of the public were involved, in any way, with this research.



### Study Design and Data Source

We carried out a retrospective analysis of the NIH's Research Portfolio Online Reporting Tools Expenditures and Results (RePORTER) database (<https://reporter.nih.gov/>), which has data on grants that were awarded by the NIH [3]. Unlike the federal Query/View/Report (QVR) database, the RePORTER database shows data only for grants that were awarded and therefore does not allow for analysis of data involving grant-applications that did not result in the awarding of a grant. As a result, we could not evaluate the success-rates of grant-applications by specialty.

The RePORTER database was searched for grants awarded between 2011 and 2020, which were classified, based on the department name on the grant-application, into one of the following 19 specialties: Anesthesiology, Dermatology, Emergency Medicine, Family Medicine, Internal Medicine, Neurology, Neurosurgery, Obstetrics and Gynecology, Ophthalmology, Orthopedic Surgery, Otolaryngology, Pathology, Pediatrics, Physical Medicine and Rehabilitation, Plastic Surgery, Psychiatry, Radiation-Diagnostic/Oncology, Surgery, and Urology [3]. These specialties were chosen, because they represent the set of all entities in the RePORTER database which constitute specialties in clinical medicine. The grants that were not classified as being among these specialties, were excluded.

We included all grants for each specialty from the RePORTER database. The grant-types appearing in the data set are listed in Appendix II.

#### *Number of active physicians*

The number of active physicians was obtained from the Physician Specialty Data Report by the American Association of Medical Colleges (AAMC). The number of active physicians included

1  
2  
3 those from all training-pathways, including Doctor of (Allopathic) Medicine (M.D.), Doctor of  
4 Osteopathic Medicine (D.O.), and international medical graduates (IMG) [4]. Because the  
5  
6 number of active physicians per specialty was only available for certain years, during the time-  
7  
8 period of 2010-2020, linear interpolation was used to estimate the number of active physicians in  
9  
10 the unlisted years (which were generally situated between years for which the number of active  
11  
12 physicians was listed) [5] (Supplementary Table 1).  
13  
14  
15

16  
17 Number of grants: We evaluated all grants awarded over the 10-year time period to identify the  
18  
19 mostly frequently awarded grant-types. The ten most frequently awarded grant-types were R01,  
20  
21 R03, R21, F32, T32, K01, K08, K23, U01, and P30. The total numbers of the 10 most frequently  
22  
23 awarded grants by specialty, were calculated, for each of the ten years under consideration  
24  
25 (Supplementary Tables 2-11). Plots of the number of grants by specialty (Supplementary Figures  
26  
27 1a and 1b) and the percent-change in the number of grants (versus 2011) by specialty  
28  
29 (Supplementary Figure 2) were created. We systematically evaluated the grants awarded at  
30  
31 critical periods in the academic career pipeline including training grants in the pre-doctoral (T32)  
32  
33 and post-doctoral (F32) period; career development K-grants (K01, K08, and K23), and grants  
34  
35 typically awarded in the later-career stages including the R01, R03, R21, U01, and P30 grants.  
36  
37  
38  
39  
40

41 Number of active physicians per grant: For each of the ten most-commonly awarded grant-types  
42  
43 (R01, R03, R21, F32, T32, K01, K08, K23, U01, and P30), the number of active physicians per  
44  
45 grant was calculated, for each specialty, for each of the ten years under consideration  
46  
47 (Supplementary Tables 12-21). This calculation was performed for each grant-type, by dividing  
48  
49 the number of active physicians in the relevant specialty in the relevant year, by the number of  
50  
51 grants awarded in the relevant specialty in the relevant year.  
52  
53  
54  
55  
56  
57  
58  
59  
60

Dollar-amount of grants: To evaluate whether the differences in numbers of grants corresponded to differences in dollar-amounts of funding, we calculated the total dollar-amounts of funding, by specialty, aggregated over the time period of 2011-2020 (Table 1).

Table 1: Number of grants, dollars of funding, and dollars of funding per active physician, by specialty, 2011-2020

| Specialty | Rank | Number of grants | Percentage of total | Average number of grants per active physician | Dollars of funding (K, rounded to 100K) | Percentage of total | Number of active physicians in 2020 | Average dollars of funding per active physician per year (K) |
|-----------|------|------------------|---------------------|-----------------------------------------------|-----------------------------------------|---------------------|-------------------------------------|--------------------------------------------------------------|
| Pathology | 1    | 14946            | 8.1                 | 0.112                                         | 6366700                                 | 7.6                 | 13374                               | 47.6                                                         |
| Neurology | 2    | 12448            | 6.8                 | 0.092                                         | 6001600                                 | 7.2                 | 13527                               | 44.4                                                         |

|                                   |    |       |      |       |              |      |        |      |
|-----------------------------------|----|-------|------|-------|--------------|------|--------|------|
| Internal<br>Medicine/Medicine     | 3  | 72205 | 39.2 | 0.063 | 360226<br>00 | 43.2 | 114539 | 31.5 |
| Psychiatry                        | 4  | 19029 | 10.3 | 0.050 | 826760<br>0  | 9.9  | 38089  | 21.7 |
| Neurosurgery                      | 5  | 2956  | 1.6  | 0.055 | 111160<br>0  | 1.3  | 5404   | 20.6 |
| Pediatrics                        | 6  | 17422 | 9.4  | 0.030 | 789650<br>0  | 9.5  | 57929  | 13.6 |
| Ophthalmology                     | 7  | 5957  | 3.2  | 0.032 | 238080<br>0  | 2.9  | 18665  | 12.8 |
| Surgery                           | 8  | 8171  | 4.4  | 0.032 | 321250<br>0  | 3.9  | 25435  | 12.6 |
| Otolaryngology                    | 9  | 3198  | 1.7  | 0.034 | 110230<br>0  | 1.3  | 9480   | 11.6 |
| Radiation-<br>Diagnostic/Oncology | 10 | 9562  | 5.2  | 0.025 | 399940<br>0  | 4.8  | 38437  | 10.4 |
| Dermatology                       | 11 | 2270  | 1.2  | 0.019 | 764500       | 0.9  | 11776  | 6.5  |
| Urology                           | 12 | 1474  | 0.8  | 0.015 | 572700       | 0.7  | 9924   | 5.8  |
| Obstetrics &<br>Gynecology        | 13 | 4343  | 2.4  | 0.010 | 169780<br>0  | 2    | 41529  | 4.1  |

|                                 |    |              |            |       |               |            |               |            |
|---------------------------------|----|--------------|------------|-------|---------------|------------|---------------|------------|
| Physical<br>Medicine &<br>Rehab | 14 | 1124         | 0.6        | 0.012 | 357900        | 0.4        | 9200          | 3.9        |
| Orthopedics                     | 15 | 2218         | 1.2        | 0.012 | 750200        | 0.9        | 19244         | 3.9        |
| Anesthesiology                  | 16 | 3770         | 2          |       | 143470<br>0   | 1.7        | 41359         | 3.5        |
| Emergency<br>Medicine           | 17 | 1258         | 0.7        |       | 550200        | 0.7        | 40232         | 1.4        |
| Family Medicine                 | 18 | 2015         | 1.1        |       | 848500        | 1          | 112277        | 0.8        |
| Plastic Surgery                 | 19 | 16           | 0          |       | 4600          | 0          | 7362          | 0.1        |
| <b>Total</b>                    | -  | <b>18438</b> | <b>100</b> |       | <b>833429</b> | <b>100</b> | <b>627782</b> | <b>133</b> |
|                                 |    | <b>2</b>     |            |       | <b>00</b>     |            |               |            |

In addition, the total dollar-amount of funding was calculated, for each specialty, for each of the ten years under consideration (Figure 1a). Internal Medicine/Medicine received much more funding than any other specialty, in each of the years studied, making it difficult to visualize the differences among the remaining specialties in the figure. To ameliorate this issue, the total dollar-amount of funding per year for each of the specialties, except for Internal Medicine/Medicine, was plotted separately (Figure 1b). In addition, to evaluate changes in funding over the time-period studied, for each year after 2011, we calculated the percent-change in the dollar-amount of funding (compared to 2011) by specialty (Figure 2). For each of the ten most commonly awarded grant-types (R01, R03, R21, F32, T32, K01, K08, K23, U01, and P30),

1  
2  
3 the total dollar-amount of funding was calculated, for each specialty, for each of the ten years  
4  
5 under consideration (Supplementary Tables 22-31).  
6  
7

8 Dollar-amount of grants per active physician: We calculated the number of dollars of funding per  
9  
10 active physician to adjust for the differing sizes of the specialties considered by dividing the  
11  
12 dollar-amount of funding for each specialty by the number of active physicians in the relevant  
13  
14 specialty (Table 1). For each of the ten most commonly awarded grant-types for each specialty,  
15  
16 for each of the ten years under consideration, the total dollar-amount of funding was divided by  
17  
18 the number of active physicians in the relevant specialty, in the relevant year (Supplementary  
19  
20 Tables 32-41).  
21  
22  
23

24  
25 Mean dollar-amount per grant, by specialty, by type: The dollar-amounts vary among individual  
26  
27 grants awarded; it is not certain whether the mean grant-amount by grant-type would be expected  
28  
29 to vary across specialties. To determine whether grant-amounts varied by specialty, we  
30  
31 calculated the mean (standard deviation) dollar-amount per grant, by specialty, by type, for each  
32  
33 of the ten years under consideration (Supplementary Tables 42-51), and aggregated over 2011-  
34  
35 2020 (Supplementary Table 52). For each of the ten most commonly awarded grant-types, for  
36  
37 each possible pair of specialties considered, these mean grant-amounts were then compared,  
38  
39 using the Bonferroni correction (Type I error rate,  $\alpha = 0.05/(19_2) = 0.0002924$ ) to adjust for  
40  
41 multiple comparisons (Supplementary Figures 3-12)).  
42  
43  
44  
45

46 All analyses were performed in Excel, version 2107 (Microsoft, Redmond, Washington) and R,  
47  
48 version 4.0.4 (R Foundation for Statistical Computing). Test-statistics were two-sided, and P-  
49  
50 values  $< 0.05$  (except in cases of multiple comparisons, where the Bonferroni correction was  
51  
52 used) were considered statistically significant.  
53  
54  
55  
56  
57  
58  
59  
60

## **Results**

From 2011 through 2020, there were 184,382 grants awarded by the NIH, in the specialties considered. Of this total number of grants, 72,205 (37.2%) were awarded in Internal Medicine/Medicine, 19,029 (10.3%) were awarded in Psychiatry, 17,422 (9.4%) were awarded in Pediatrics, and 14,946 (8.1%) were awarded in Pathology (Table 1). In comparison, 16 grants (0.0%) were awarded in Plastic Surgery, 1258 (0.7%) were awarded in Emergency Medicine, 2015 (1.1%) were awarded in Family Medicine, and 2956 (1.6%) were awarded in Neurosurgery (Table 1).

Number of grants: Across the ten-year time-period studied, Internal Medicine/Medicine consistently received the most grants per year, followed by Psychiatry, Pediatrics, Pathology, and Neurology (Supplementary Figures 1a and 1b). From 2012-2020, the average percentage-change in the number of grants by specialty, compared to the initial year (2011), was 40.8% for Emergency Medicine, 34.2% for Neurosurgery, and 32.2% for Orthopedics being the third-highest. It was -51.9% for Plastic Surgery, -36.8% for Otolaryngology (-36.8%), and -24.5% for Radiation-Diagnostic/Oncology (Supplementary Figure 2). In addition to receiving the greatest number of grants, in aggregate, Internal Medicine/Medicine consistently received the greatest number of grants. For each of the ten most commonly awarded grant-types, the number of grants, for each of the specialties considered, for each of the ten years under consideration, was calculated, for R01 (Supplementary Table 2), R03 (Supplementary Table 3), R21 (Supplementary Table 4), F32 (Supplementary Table 5), T32 (Supplementary Table 6), K01 (Supplementary Table 7), K08 (Supplementary Table 8), K23 (Supplementary Table 9), U01 (Supplementary Table 10), and P30 (Supplementary Table 11). For each of the ten most-

commonly awarded grant-types, the number of grants, for each of the specialties

|                               | F32  | K01  | K08  | K23  | P30  | R01   | R03  | R21  | T32  | U01  |
|-------------------------------|------|------|------|------|------|-------|------|------|------|------|
| ANESTHESIOLOGY                | 43   | 53   | 167  | 126  | 1    | 2258  | 63   | 289  | 178  | 111  |
| DERMATOLOGY                   | 32   | 73   | 146  | 49   | 82   | 1169  | 54   | 182  | 105  | 65   |
| EMERGENCY MEDICINE            | 4    | 9    | 58   | 171  | 0    | 415   | 27   | 58   | 9    | 89   |
| FAMILY MEDICINE               | 2    | 97   | 27   | 59   | 30   | 787   | 56   | 174  | 51   | 131  |
| INTERNAL<br>MEDICINE/MEDICINE | 1161 | 1462 | 2535 | 2791 | 3122 | 30801 | 1147 | 3829 | 3691 | 4512 |
| NEUROLOGY                     | 235  | 175  | 352  | 529  | 181  | 5769  | 129  | 791  | 340  | 577  |
| NEUROSURGERY                  | 96   | 16   | 101  | 44   | 18   | 1669  | 47   | 272  | 46   | 129  |
| OBSTETRICS &<br>GYNECOLOGY    | 46   | 48   | 55   | 103  | 41   | 1620  | 119  | 286  | 107  | 137  |
| OPHTHALMOLOGY                 | 83   | 7    | 268  | 166  | 303  | 3823  | 15   | 327  | 204  | 67   |
| ORTHOPEDECS                   | 60   | 62   | 48   | 26   | 49   | 1349  | 83   | 215  | 76   | 7    |
| OTOLARYNGOLOGY                | 86   | 9    | 112  | 100  | 118  | 1642  | 118  | 225  | 157  | 38   |
| PATHOLOGY                     | 201  | 148  | 306  | 21   | 206  | 8110  | 197  | 1282 | 718  | 390  |
| PEDIATRICS                    | 194  | 208  | 1007 | 924  | 186  | 7467  | 362  | 1146 | 865  | 1161 |
| PHYSICAL MEDICINE &<br>REHAB  | 17   | 80   | 6    | 68   | 0    | 443   | 58   | 89   | 46   | 51   |
| PLASTIC SURGERY               | 1    | 0    | 0    | 0    | 0    | 7     | 2    | 0    | 0    | 3    |

considered, aggregated over 2011-2020, is shown in Table 2.

Table 2: Frequency, by grant-type, 2011-2020



|                                   |     |     |     |      |     |      |     |      |     |     |
|-----------------------------------|-----|-----|-----|------|-----|------|-----|------|-----|-----|
| PSYCHIATRY                        | 293 | 743 | 250 | 1060 | 133 | 9066 | 236 | 1580 | 772 | 825 |
| RADIATION-<br>DIAGNOSTIC/ONCOLOGY | 65  | 147 | 66  | 36   | 81  | 5424 | 145 | 1062 | 266 | 342 |
| SURGERY                           | 172 | 92  | 464 | 106  | 300 | 3975 | 174 | 540  | 532 | 536 |
| UROLOGY                           | 22  | 33  | 63  | 22   | 39  | 686  | 27  | 83   | 55  | 160 |

Number of active physicians per grant: For F32 and T32 training-grants, Internal

Medicine/Medicine, Neurology, and Pathology consistently had the lowest numbers of physicians per grant, across the ten-year time-period considered (Supplementary Tables 15 and 16). For T32 and F32 Training Grants, Emergency Medicine and Family Medicine consistently had the highest numbers of active physicians per grant (in many cases, this number could not be calculated, due to 0 grants having been awarded in the relevant specialty, for the relevant year).

For K01, K08, and K23 grants, Internal Medicine/Medicine, Neurology, and Pathology consistently had the lowest numbers of physicians per awarded grant (Supplementary Tables 17, 18, and 19). For K01 grants, Emergency Medicine and Family Medicine again had the highest numbers of active physicians per grant (Supplementary Table 17). For K08 grants, Emergency Medicine, Family Medicine, and Radiation-Oncology/Diagnostic had the highest numbers of physicians per grant (Supplementary Table 18). For K23 grants, Family Medicine and Radiation-Oncology/Diagnostic consistently had the highest numbers of physicians per grant

(Supplementary Table 19). For R01 and U01s, Internal Medicine/Medicine, Neurology, and Pathology consistently had the lowest numbers of physicians per awarded grant (Supplementary Tables 12 and 20). For R01 grants, Plastic Surgery, Family Medicine, and Emergency Medicine consistently had the highest numbers of physicians per awarded grant (Supplementary Table 12)

1  
2  
3 and For U01 grants, Emergency Medicine, Family Medicine, and Orthopedics consistently had  
4 the highest numbers of physicians per awarded grant (Supplementary Table 20).  
5  
6

7  
8 Dollar-amount of grants: The total dollar-amount of funding awarded over the time period was  
9 \$83,342 MM USD. Of this total, the specialties receiving the largest total amounts of funding  
10 were Internal Medicine/Medicine, with \$36,023MM (43.2%), Psychiatry, with \$8,268MM  
11 (9.9%), and Pediatrics, with \$7,897MM (9.5%). The specialties receiving the least funding were  
12 Plastic Surgery, with \$4.6MM (0.0%), Physical Medicine & Rehab, with \$358MM (0.4%), and  
13 Emergency Medicine, with \$550MM (0.7%) (Table 1). Internal Medicine/Medicine was  
14 consistently the most-funded specialty, across the ten years studied (Figure 1a). Psychiatry had  
15 the largest percent-increase in amount of funding, compared to the baseline year of 2011, of the  
16 specialties considered (Figure 2).  
17  
18  
19  
20  
21  
22  
23  
24  
25  
26  
27  
28

29  
30 Dollar-amount of grants per active physician: Pathology had the highest total amount of funding  
31 per physician (\$50.4K/year) (this total included funding from all grant-types, combined) of any  
32 of the specialties considered (Table 1). Funding per physician was \$42.5K/year for Neurology  
33 (Table 1), and Neurology overtook pathology in 2018, in terms of the dollars of funding per  
34 physician (Figure 1b). The amount of funding per active physician for Radiation-  
35 Diagnostic/Oncology was \$11.1K/year (Table 1).  
36  
37  
38  
39  
40  
41  
42  
43

44 Internal Medicine/Medicine, Neurology, Pathology, and Psychiatry had the highest amounts of  
45 T32 funding per physician (Supplementary Table 36). Internal Medicine/Medicine, Neurology,  
46 Neurosurgery, and Pathology had the highest amounts of F32 funding per physician  
47 (Supplementary Table 35). Internal Medicine/Medicine, Neurology, Pathology, and Psychiatry  
48 had the highest amounts of K01 and K08 funding per physician (Supplementary Table 37 and  
49 Supplementary Table 38). Internal Medicine/Medicine, Neurology, Pediatrics, and Psychiatry  
50  
51  
52  
53  
54  
55  
56  
57  
58  
59  
60

1  
2  
3 had the highest amounts of K23 funding per active physician (Supplementary Table 39). Internal  
4  
5 Medicine/Medicine, Neurology, Neurosurgery, and Psychiatry had the highest amounts of R01  
6  
7 and U01 funding per physician (Supplementary Table 32 and Supplementary Table 40).  
8  
9

#### 10 Mean dollar-amount per grant, by specialty, by type:

11  
12  
13 Almost all the comparisons of the mean F32 funding amount among specialties were  
14  
15 insignificant after the Bonferroni correction for multiple tests however (Supplementary Figure  
16  
17 3). Psychiatry had higher mean funding amounts per K01 grant when compared to most other  
18  
19 specialties (Supplementary Figure 4), whereas Ophthalmology had higher mean funding amounts  
20  
21 for K08 (Supplementary Figure 5) and K23 (Supplementary Figure 6) grants when compared to  
22  
23 most other specialties. Obstetrics and gynecology had lower mean funding amounts for K23 than  
24  
25 most other specialties (Supplementary Figure 6). Most of the comparisons of the mean R01  
26  
27 funding amount among specialties were significant after the Bonferroni correction for multiple  
28  
29 tests, while most such comparisons for P30, R03, and R21 were not (Supplementary Figure 7,  
30  
31 Supplementary Figure 8, Supplementary Figure 9, and Supplementary Figure 10). Internal  
32  
33 Medicine/Medicine and Pathology had higher mean funding amounts per T32 grant when  
34  
35 compared to most other specialties (Supplementary Figure 11). We found that Internal  
36  
37 Medicine/Medicine and Neurology had higher average funding amounts per U01 grant than most  
38  
39 other specialties (Supplementary Figure 12).  
40  
41  
42  
43  
44  
45

#### 46 **Discussion**

47  
48  
49 The number of NIH grants awarded over the ten-year time-period studied differed substantially  
50  
51 across the specialties. Internal Medicine/Medicine consistently received the greatest number of  
52  
53 grants, followed by Psychiatry, Pediatrics, Pathology, and Neurology. The dollar-amount of  
54  
55  
56  
57  
58  
59  
60

1  
2  
3 funding also showed significant differences between specialties, with Internal  
4  
5 Medicine/Medicine receiving a plurality of the overall amount of funding. These differences  
6  
7 were not only due to differing sizes of the specialties, as can be seen from the fact that the dollars  
8  
9 of funding awarded per active physician also differed markedly across specialties. The  
10  
11 specialties with the highest levels of funding per active physician were Pathology, Neurology,  
12  
13 Internal Medicine, and Psychiatry, and those with the lowest levels of funding per active  
14  
15 physician were Plastic Surgery, Family Medicine, Emergency Medicine, and Anesthesiology.  
16  
17  
18  
19

20 The differences in funding were noted at all levels, including at the pre- and post-doctoral  
21  
22 training levels (T32 and F32), at the career development award levels (K01, K08 and K23) levels  
23  
24 and at the most established researcher levels (R01, R21 and U01). These differences in research-  
25  
26 funding between specialties have likely already had significant consequences for future progress  
27  
28 in research. It has been shown that the proportion of individuals with M.D./Ph.D.'s who spend at  
29  
30 least 50% of their time on research differs markedly by specialty [6]. In particular, based on prior  
31  
32 research, the three specialties that were most highly funded, on a per-physician basis (Pathology,  
33  
34 Neurology, and Internal Medicine) were noted to have higher proportions of individuals  
35  
36 spending at least 50% of their time on research, while Family Medicine and Emergency  
37  
38 Medicine (which were among the three lowest-funded) have much lower such proportions [7].  
39  
40  
41  
42

43 Whether specialty-choice is a driver of subsequent research-focus in physicians' careers is  
44  
45 unknown; however, it is easy to speculate that greater availability of NIH funding in certain  
46  
47 fields may facilitate research-focused careers.  
48  
49

50 The specialties of internal medicine, pathology, pediatrics, and neurology together accounted for  
51  
52 approximately 60% of the specialties in which Medical Scientist Training Program (MSTP)  
53  
54 MD/PhD graduates attended residency programs [7]. Three of these specialties are the three  
55  
56  
57  
58  
59  
60

1  
2  
3 specialties with the highest amount of NIH funding per active physician. The temporal trend is  
4  
5 difficult to assess and it is unclear whether the MSTP graduates were more attracted to these  
6  
7 specialties because of NIH funding per active physician or whether MSTP graduates in these  
8  
9 specialties were able to acquire more NIH funding per active physician. However, the  
10  
11 distribution of specialties pursued by MSTP graduates has changed over time, and many  
12  
13 specialties now have substantial representation [7], which means a larger proportion of these  
14  
15 MSTP graduates are in less well funded specialties. The presence of substantial numbers of  
16  
17 M.D./Ph.D.'s in specialties with lower levels of funding (e.g., the 12.9% of M.D./Ph.D.'s in  
18  
19 Pediatrics, the 7.0% in Surgical specialties, and the 4.2% in Radiation-Diagnostic/Oncology)  
20  
21 leaves the possibility of a mismatch between the supply of such well-trained research scientists,  
22  
23 and the amount of funding available to them, which could lead to increased competition for  
24  
25 research-grants in these specialties, and increased attrition, ultimately further exacerbating the  
26  
27 relatively lower levels of research in these specialties [6]. This problem is not unique to  
28  
29 MD/PhDs and may occur for nurses, nurse practitioners, public health scientists, social workers,  
30  
31 engineers and PhDs and other biomedical research professionals who do research in one of the  
32  
33 less funded specialties.  
34  
35  
36  
37  
38  
39

40 The importance of having a diverse biomedical workforce has been stressed over the past year.  
41  
42 Diversity in race/ethnicity and gender have been at the forefront of these discussions because of  
43  
44 the tremendous health disparities that exist across races/ethnicities and genders. However, this  
45  
46 research shows that there are disparities in funding based on physician specialty. Further research  
47  
48 is required to create an equitable way to distribute the NIH research dollars across all medical  
49  
50 specialties to capture the diverse talents available in each physician specialty field.  
51  
52  
53  
54  
55  
56  
57  
58  
59  
60

1  
2  
3 This study has a few limitations. We assumed that the size of the active physician workforce was  
4 a proxy for the relative amount of clinical/public health need for given specialty. However,  
5  
6 deviations from proportionality may arise, for instance, if the diseases treated by certain  
7  
8 specialties result in greater morbidity/mortality or cost to society. In addition, the calculation of  
9  
10 funding per active physician did not take into account non-physician researchers, such as non-  
11  
12 physicians with Ph.D.'s, or with degrees in public health, nursing, pharmacy, or engineering. The  
13  
14 categorization of grants into specialties was based only on the department listed on the grant-  
15  
16 application, and did not take into account the training-backgrounds of the PI's who received their  
17  
18 grants, whether the PIs were clinicians, the specialties in which these PI's were clinically  
19  
20 practicing, or the departments with which these PI's were affiliated. Finally, the analyses in this  
21  
22 study were based only on grants that were awarded and did not include any data for grant-  
23  
24 applications which were rejected. However, data on grant-applications is not included in the  
25  
26 RePORTER database and can only be accessed through an internal database at the NIH, making  
27  
28 it unavailable for this study.  
29  
30  
31  
32  
33  
34  
35

36 In conclusion, the number of NIH grants, total dollar amount of funding, dollar amount of  
37  
38 funding per active physician, and the mean funding-amount per grant (by grant-type) vary by  
39  
40 specialty. Further research is required to investigate an equitable and just way to distribute NIH  
41  
42 research dollars to increase diversity in NIH funding by physician specialty.  
43  
44  
45

### 46 **Figures and Tables**

47  
48  
49 Figure 1a – Dollar-amount of grant-funding, by specialty

50  
51  
52 Figure 1b – Dollar-amount of grant-funding adjusted by the number of active physicians

53  
54  
55 Figure 2: Percent change in dollar-amount of grant-funding, by specialty, by year

1  
2  
3 Table 1: Number of grants, dollars of funding, and dollars of funding per active physician, by  
4 specialty, 2011-2020

5  
6  
7  
8 Table 2: Frequency, by grant-type, 2011-2020  
9

## 10 **Supplemental Figures and Tables**

11  
12  
13  
14 Supplementary Figure 1a: Number of Grants, per Year, by Specialty

15  
16  
17 Supplementary Figure 1b: Number of Grants, per Year, by Specialty, without Internal  
18 Medicine/Medicine

19  
20  
21  
22 Supplementary Figure 2: Percent-Change in Number of Grants (compared to 2011), per Year, by  
23 Specialty

24  
25  
26  
27 Supplementary Figure 3: F32 grant dollar-amount comparisons

28  
29  
30 Supplementary Figure 4: K01 grant dollar-amount comparisons

31  
32  
33 Supplementary Figure 5: K08 grant dollar-amount comparisons

34  
35  
36 Supplementary Figure 6: K23 grant dollar-amount comparisons

37  
38  
39 Supplementary Figure 7: P30 grant dollar-amount comparisons

40  
41  
42 Supplementary Figure 8: R01 grant dollar-amount comparisons

43  
44  
45 Supplementary Figure 9: R03 grant dollar-amount comparisons

46  
47  
48 Supplementary Figure 10: R21 grant dollar-amount comparisons

49  
50  
51 Supplementary Figure 11: T32 grant dollar-amount comparisons

52  
53  
54 Supplementary Figure 12: U01 grant dollar-amount comparisons  
55  
56  
57  
58  
59  
60

1  
2  
3 Supplementary Table 1: Number of active physicians by specialty, 2010-2020

4  
5 Supplementary Table 2: Number of NIH R01 grants awarded from 2011-2020, by specialty

6  
7  
8 Supplementary Table 3: Number of NIH R03 grants awarded from 2011-2020, by specialty

9  
10  
11 Supplementary Table 4: Number of NIH R21 grants awarded from 2011-2020, by specialty

12  
13  
14 Supplementary Table 5: Number of NIH F32 grants awarded from 2011-2020, by specialty

15  
16  
17 Supplementary Table 6: Number of NIH T32 grants awarded from 2011-2020, by specialty

18  
19  
20 Supplementary Table 7: Number of NIH K01 grants awarded from 2011-2020, by specialty

21  
22  
23 Supplementary Table 8: Number of NIH K08 grants awarded from 2011-2020, by specialty

24  
25  
26 Supplementary Table 9: Number of NIH K23 grants awarded from 2011-2020, by specialty

27  
28  
29 Supplementary Table 10: Number of NIH U01 grants awarded from 2011-2020, by specialty

30  
31  
32 Supplementary Table 11: Number of NIH P30 grants awarded from 2011-2020, by specialty

33  
34  
35 Supplementary Table 12: Number of active physicians per R01 grant, by specialty, 2011-2020

36  
37  
38 Supplementary Table 13: Number of active physicians per R03 grant, by specialty, 2011-2020

39  
40  
41 Supplementary Table 14: Number of active physicians per R21 grant, by specialty, 2011-2020

42  
43  
44 Supplementary Table 15: Number of active physicians per F32 grant, by specialty, 2011-2020

45  
46  
47 Supplementary Table 16: Number of active physicians per T32 grant, by specialty, 2011-2020

48  
49  
50 Supplementary Table 17: Number of active physicians per K01 grant, by specialty, 2011-2020

51  
52  
53 Supplementary Table 18: Number of active physicians per K08 grant, by specialty, 2011-2020

54  
55  
56 Supplementary Table 19: Number of active physicians per K23 grant, by specialty, 2011-2020



1  
2  
3 Supplementary Table 20: Number of active physicians per U01 grant, by specialty, 2011-2020

4  
5  
6 Supplementary Table 21: Number of active physicians per P30 grant, by specialty, 2011-2020

7  
8  
9 Supplementary Table 22: Total R01-grant-funding, by specialty, 2011-2020, in thousands of  
10 dollars

11  
12  
13  
14 Supplementary Table 23: Total R03-grant-funding, by specialty, 2011-2020, in thousands of  
15 dollars

16  
17  
18  
19 Supplementary Table 24: Total R21-grant-funding, by specialty, 2011-2020, in thousands of  
20 dollars

21  
22  
23  
24 Supplementary Table 25: Total F32-grant-funding, by specialty, 2011-2020, in thousands of  
25 dollars

26  
27  
28  
29 Supplementary Table 26: Total T32-grant-funding, by specialty, 2011-2020, in thousands of  
30 dollars

31  
32  
33  
34 Supplementary Table 27: Total K01-grant-funding, by specialty, 2011-2020, in thousands of  
35 dollars

36  
37  
38  
39 Supplementary Table 28: Total K08-grant-funding, by specialty, 2011-2020, in thousands of  
40 dollars

41  
42  
43  
44 Supplementary Table 29: Total K23-grant-funding, by specialty, 2011-2020, in thousands of  
45 dollars

46  
47  
48  
49 Supplementary Table 30: Total U01-grant-funding, by specialty, 2011-2020, in thousands of  
50 dollars

1  
2  
3 Supplementary Table 31: Total P30-grant-funding, by specialty, 2011-2020, in thousands of  
4 dollars

5  
6  
7  
8 Supplementary Table 32: R01-grant-funding per active physician, by specialty, 2011-2020

9  
10  
11 Supplementary Table 33: R03-grant-funding per active physician, by specialty, 2011-2020

12  
13  
14 Supplementary Table 34: R21-grant-funding per active physician, by specialty, 2011-2020

15  
16  
17 Supplementary Table 35: F32-grant-funding per active physician, by specialty, 2011-2020

18  
19  
20 Supplementary Table 36: T32-grant-funding per active physician, by specialty, 2011-2020

21  
22  
23 Supplementary Table 37: K01-grant-funding per active physician, by specialty, 2011-2020

24  
25  
26 Supplementary Table 38: K08-grant-funding per active physician, by specialty, 2011-2020

27  
28  
29 Supplementary Table 39: K23-grant-funding per active physician, by specialty, 2011-2020

30  
31  
32 Supplementary Table 40: U01-grant-funding per active physician, by specialty, 2011-2020

33  
34  
35 Supplementary Table 41: P30-grant-funding per active physician, by specialty, 2011-2020

36  
37  
38 Supplementary Table 42: Mean (standard deviation) R01-grant-funding-amount, by specialty,  
39 2011-2020

40  
41  
42  
43 Supplementary Table 43: Mean (standard deviation) R03-grant-funding-amount, by specialty,  
44 2011-2020

45  
46  
47  
48 Supplementary Table 44: Mean (standard deviation) R21-grant-funding-amount, by specialty,  
49 2011-2020

1  
2  
3 Supplementary Table 45: Mean (standard deviation) F32-grant-funding-amount, by specialty,  
4  
5 2011-2020

6  
7  
8 Supplementary Table 46: Mean (standard deviation) T32-grant-funding-amount, by specialty,  
9  
10 2011-2020

11  
12  
13 Supplementary Table 47: Mean (standard deviation) K01-grant-funding-amount, by specialty,  
14  
15 2011-2020

16  
17  
18 Supplementary Table 48: Mean (standard deviation) K08-grant-funding-amount, by specialty,  
19  
20 2011-2020

21  
22  
23 Supplementary Table 49: Mean (standard deviation) K23-grant-funding-amount, by specialty,  
24  
25 2011-2020

26  
27  
28 Supplementary Table 50: Mean (standard deviation) U01-grant-funding-amount, by specialty,  
29  
30 2011-2020

31  
32  
33 Supplementary Table 51: Mean (standard deviation) P30-grant-funding-amount, by specialty,  
34  
35 2011-2020

36  
37  
38 Supplementary Table 52: Average grant-dollar-amount (in thousands of dollars), 2011-2020, by  
39  
40 grant-type and specialty  
41  
42  
43  
44  
45  
46  
47  
48  
49  
50  
51  
52  
53  
54  
55  
56  
57  
58  
59  
60

1  
2  
3 **Contributorship Statement:** AS and RS analyzed the data and drafted and revised the paper.  
4  
5

6 **Competing Interests:** The authors have no competing interests to disclose.  
7  
8

9 **Funding Statement:** This research received no specific grant from any funding agency in the  
10 public, commercial or not-for-profit sectors.  
11  
12

13  
14 **Data-Sharing Statement:** Dataset available from the NIH RePORTER  
15

16 (<https://reporter.nih.gov/advanced-search>).  
17  
18

19 **Ethics Statement:** This study was evaluated by the local Institutional Review Board (IRB). The  
20 study involves freely available, public data, and was determined to be exempt.  
21  
22  
23  
24  
25  
26  
27  
28  
29  
30  
31  
32  
33  
34  
35  
36  
37  
38  
39  
40  
41  
42  
43  
44  
45  
46  
47  
48  
49  
50  
51  
52  
53  
54  
55  
56  
57  
58  
59  
60

## References

1. National Institutes of Health (NIH). 2021. *Budget*. [online] Available at: <<https://www.nih.gov/about-nih/what-we-do/budget>> [Accessed 25 August 2021].
2. Healthy Funding: The Critical Role of Investing in NIH to Boost Health and Lower Costs. Robert D. Atkinson, Information Technology & Innovation Foundation, March 25, 2019. <https://itif.org/publications/2019/03/25/healthy-funding-critical-role-investing-nih-boost-health-and-lower-costs>
3. RePORT } RePORTER [Internet]. Reporter.nih.gov. 2021 [cited 2021 Mar 29]; Available from: <https://reporter.nih.gov/advanced-search>
4. 2020 Key Definitions, Commonly Used Acronyms, and Practice Specialties [Internet]. AAMC. 2021 [cited 2021 May 17]; Available from: <https://www.aamc.org/data-reports/workforce/interactive-data/2020-key-definitions-commonly-used-acronyms-and-practice-specialties>
5. Number of People per Active Physician by Specialty, 2019 [Internet]. AAMC. 2021 [cited 2021 May 10]; Available from: <https://www.aamc.org/what-we-do/mission-areas/health-care/workforce-studies/interactive-data/number-people-active-physician-specialty-2019>
6. Akabas MH, Brass LF. The national MD-PhD program outcomes study: Relationships between medical specialty, training duration, research effort, and career paths. *JCI Insight*. 2019;4(19):133009.
7. Akabas MH, Brass LF. The national MD-PhD program outcomes study: Outcomes variation by sex, race, and ethnicity. *JCI Insight*. 2019;4(19):133010.

1  
2  
3 8. Brass LF, Akabas MH, Burnley LD, Engman DM, Wiley CA, Andersen OS. Are MD-PhD  
4 programs meeting their goals? An analysis of career choices made by graduates of 24 MD-PhD  
5 programs. *Acad Med.* 2010;85(4):692-701. doi:10.1097/ACM.0b013e3181d3ca17  
6  
7  
8  
9  
10  
11  
12  
13  
14  
15  
16  
17  
18  
19  
20  
21  
22  
23  
24  
25  
26  
27  
28  
29  
30  
31  
32  
33  
34  
35  
36  
37  
38  
39  
40  
41  
42  
43  
44  
45  
46  
47  
48  
49  
50  
51  
52  
53  
54  
55  
56  
57  
58  
59  
60

1  
2  
3  
4  
5  
6  
7  
8  
9  
10  
11  
12  
13  
14  
15  
16  
17  
18  
19  
20  
21  
22  
23  
24  
25  
26  
27  
28  
29  
30  
31  
32  
33  
34  
35  
36  
37  
38  
39  
40  
41  
42  
43  
44  
45  
46  
47  
48  
49  
50  
51  
52  
53  
54  
55  
56  
57  
58  
59  
60

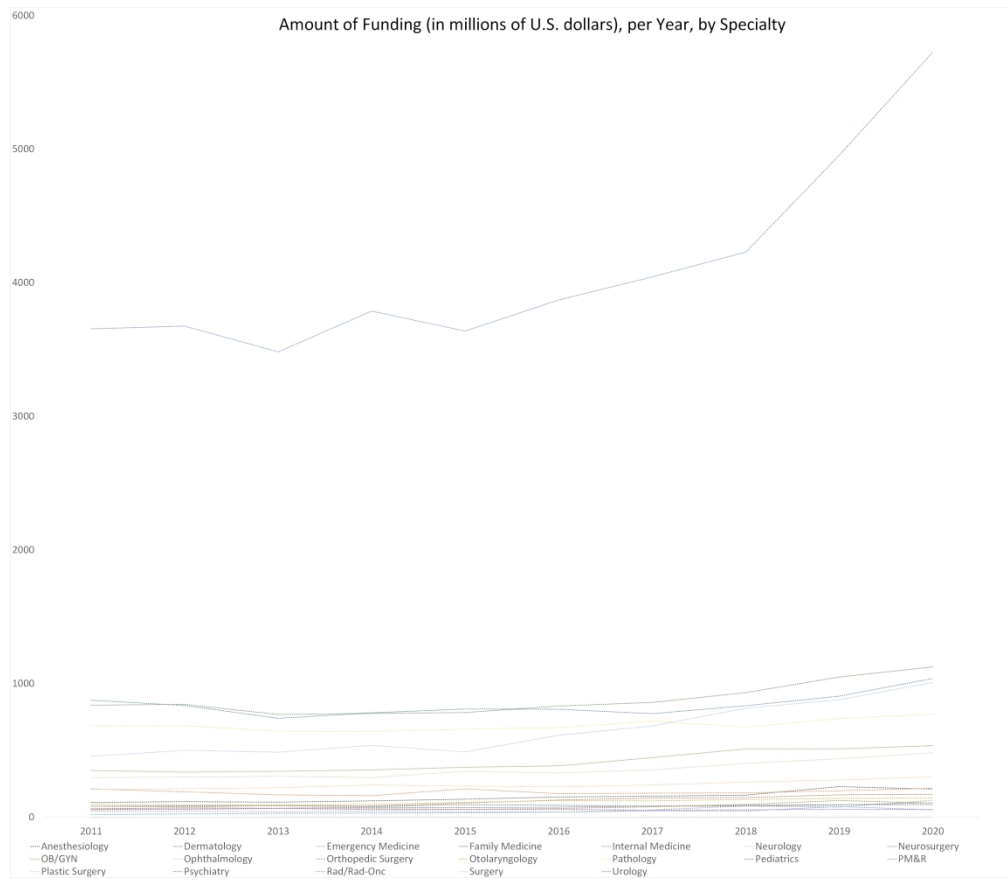

Figure 1a

969x843mm (96 x 96 DPI)

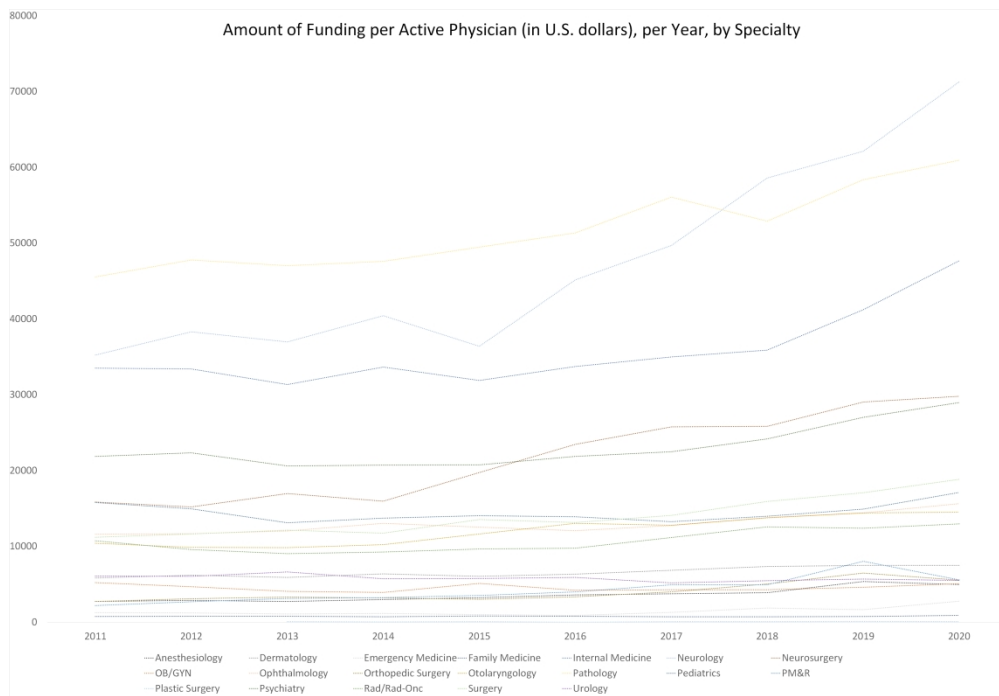

Figure 1b

968x667mm (96 x 96 DPI)



1  
2  
3  
4  
5  
6  
7  
8  
9  
10  
11  
12  
13  
14  
15  
16  
17  
18  
19  
20  
21  
22  
23  
24  
25  
26  
27  
28  
29  
30  
31  
32  
33  
34  
35  
36  
37  
38  
39  
40  
41  
42  
43  
44  
45  
46  
47  
48  
49  
50  
51  
52  
53  
54  
55  
56  
57  
58  
59  
60

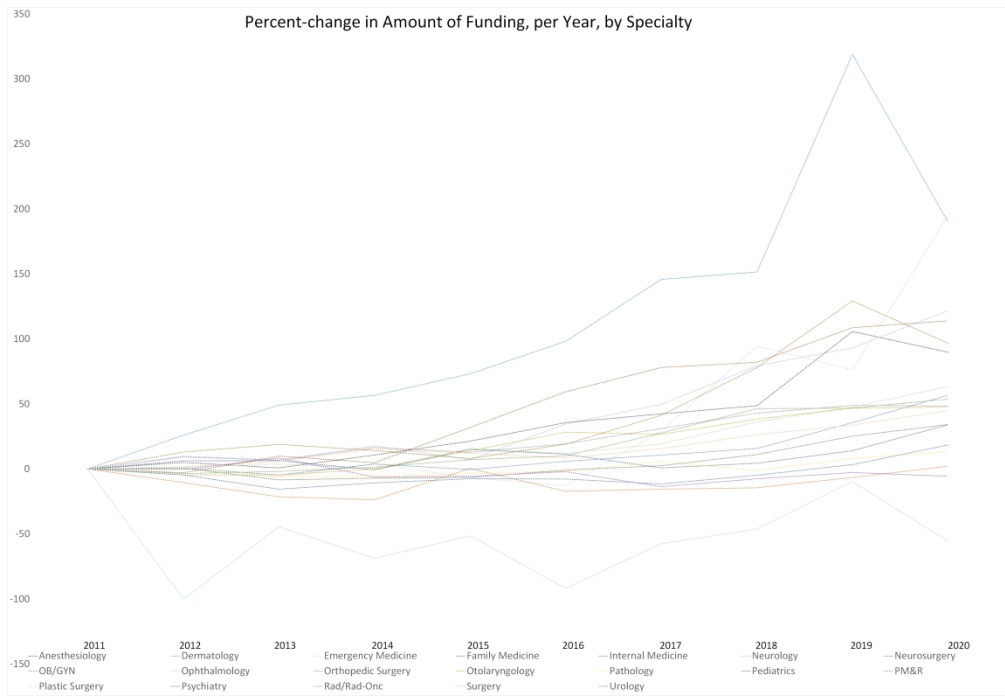

Figure 2

969x668mm (96 x 96 DPI)

## **Supplementary Figures and Tables**

Supplementary Figure 1a: Number of Grants, per Year, by Specialty

Supplementary Figure 1b: Number of Grants, per Year, by Specialty, without Internal  
Medicine/Medicine

Supplementary Figure 2: Percent-Change in Number of Grants (compared to 2011), per Year, by  
Specialty

Supplementary Figure 3: F32 grant dollar-amount comparisons

Supplementary Figure 4: K01 grant dollar-amount comparisons

Supplementary Figure 5: K08 grant dollar-amount comparisons

Supplementary Figure 6: K23 grant dollar-amount comparisons

Supplementary Figure 7: P30 grant dollar-amount comparisons

Supplementary Figure 8: R01 grant dollar-amount comparisons

Supplementary Figure 9: R03 grant dollar-amount comparisons

Supplementary Figure 10: R21 grant dollar-amount comparisons

Supplementary Figure 11: T32 grant dollar-amount comparisons

Supplementary Figure 12: U01 grant dollar-amount comparisons

Supplementary Table 1: Number of active physicians by specialty, 2010-2020

Supplementary Table 2: Number of NIH R01 grants awarded from 2011-2020, by specialty

Supplementary Table 3: Number of NIH R03 grants awarded from 2011-2020, by specialty

1  
2  
3 Supplementary Table 4: Number of NIH R21 grants awarded from 2011-2020, by specialty

4  
5  
6 Supplementary Table 5: Number of NIH F32 grants awarded from 2011-2020, by specialty

7  
8  
9 Supplementary Table 6: Number of NIH T32 grants awarded from 2011-2020, by specialty

10  
11  
12 Supplementary Table 7: Number of NIH K01 grants awarded from 2011-2020, by specialty

13  
14  
15 Supplementary Table 8: Number of NIH K08 grants awarded from 2011-2020, by specialty

16  
17  
18 Supplementary Table 9: Number of NIH K23 grants awarded from 2011-2020, by specialty

19  
20  
21 Supplementary Table 10: Number of NIH U01 grants awarded from 2011-2020, by specialty

22  
23  
24 Supplementary Table 11: Number of NIH P30 grants awarded from 2011-2020, by specialty

25  
26  
27 Supplementary Table 12: Number of active physicians per R01 grant, by specialty, 2011-2020

28  
29  
30 Supplementary Table 13: Number of active physicians per R03 grant, by specialty, 2011-2020

31  
32  
33 Supplementary Table 14: Number of active physicians per R21 grant, by specialty, 2011-2020

34  
35  
36 Supplementary Table 15: Number of active physicians per F32 grant, by specialty, 2011-2020

37  
38  
39 Supplementary Table 16: Number of active physicians per T32 grant, by specialty, 2011-2020

40  
41  
42 Supplementary Table 17: Number of active physicians per K01 grant, by specialty, 2011-2020

43  
44  
45 Supplementary Table 18: Number of active physicians per K08 grant, by specialty, 2011-2020

46  
47  
48 Supplementary Table 19: Number of active physicians per K23 grant, by specialty, 2011-2020

49  
50  
51 Supplementary Table 20: Number of active physicians per U01 grant, by specialty, 2011-2020

52  
53  
54 Supplementary Table 21: Number of active physicians per P30 grant, by specialty, 2011-2020

55  
56  
57  
58 2

1  
2  
3 Supplementary Table 22: Total R01-grant-funding, by specialty, 2011-2020, in thousands of  
4 dollars

5  
6  
7  
8 Supplementary Table 23: Total R03-grant-funding, by specialty, 2011-2020, in thousands of  
9 dollars

10  
11  
12  
13 Supplementary Table 24: Total R21-grant-funding, by specialty, 2011-2020, in thousands of  
14 dollars

15  
16  
17  
18 Supplementary Table 25: Total F32-grant-funding, by specialty, 2011-2020, in thousands of  
19 dollars

20  
21  
22  
23 Supplementary Table 26: Total T32-grant-funding, by specialty, 2011-2020, in thousands of  
24 dollars

25  
26  
27  
28 Supplementary Table 27: Total K01-grant-funding, by specialty, 2011-2020, in thousands of  
29 dollars

30  
31  
32  
33 Supplementary Table 28: Total K08-grant-funding, by specialty, 2011-2020, in thousands of  
34 dollars

35  
36  
37  
38 Supplementary Table 29: Total K23-grant-funding, by specialty, 2011-2020, in thousands of  
39 dollars

40  
41  
42  
43 Supplementary Table 30: Total U01-grant-funding, by specialty, 2011-2020, in thousands of  
44 dollars

45  
46  
47  
48 Supplementary Table 31: Total P30-grant-funding, by specialty, 2011-2020, in thousands of  
49 dollars

50  
51 Supplementary Table 32: R01-grant-funding per active physician, by specialty, 2011-2020

52  
53  
54  
55  
56  
57  
58 3

1  
2  
3 Supplementary Table 33: R03-grant-funding per active physician, by specialty, 2011-2020

4  
5  
6 Supplementary Table 34: R21-grant-funding per active physician, by specialty, 2011-2020

7  
8  
9 Supplementary Table 35: F32-grant-funding per active physician, by specialty, 2011-2020

10  
11  
12 Supplementary Table 36: T32-grant-funding per active physician, by specialty, 2011-2020

13  
14  
15 Supplementary Table 37: K01-grant-funding per active physician, by specialty, 2011-2020

16  
17  
18 Supplementary Table 38: K08-grant-funding per active physician, by specialty, 2011-2020

19  
20  
21 Supplementary Table 39: K23-grant-funding per active physician, by specialty, 2011-2020

22  
23  
24 Supplementary Table 40: U01-grant-funding per active physician, by specialty, 2011-2020

25  
26  
27 Supplementary Table 41: P30-grant-funding per active physician, by specialty, 2011-2020

28  
29  
30 Supplementary Table 42: Mean (standard deviation) R01-grant-funding-amount, by specialty,  
31 2011-2020

32  
33  
34  
35 Supplementary Table 43: Mean (standard deviation) R03-grant-funding-amount, by specialty,  
36 2011-2020

37  
38  
39  
40 Supplementary Table 44: Mean (standard deviation) R21-grant-funding-amount, by specialty,  
41 2011-2020

42  
43  
44  
45 Supplementary Table 45: Mean (standard deviation) F32-grant-funding-amount, by specialty,  
46 2011-2020

47  
48  
49  
50 Supplementary Table 46: Mean (standard deviation) T32-grant-funding-amount, by specialty,  
51 2011-2020

1  
2  
3 Supplementary Table 47: Mean (standard deviation) K01-grant-funding-amount, by specialty,  
4  
5 2011-2020

6  
7  
8 Supplementary Table 48: Mean (standard deviation) K08-grant-funding-amount, by specialty,  
9  
10 2011-2020

11  
12  
13 Supplementary Table 49: Mean (standard deviation) K23-grant-funding-amount, by specialty,  
14  
15 2011-2020

16  
17  
18 Supplementary Table 50: Mean (standard deviation) U01-grant-funding-amount, by specialty,  
19  
20 2011-2020

21  
22  
23 Supplementary Table 51: Mean (standard deviation) P30-grant-funding-amount, by specialty,  
24  
25 2011-2020

26  
27  
28 Supplementary Table 52: Average grant-dollar-amount (in thousands of dollars), 2011-2020, by  
29  
30 grant-type and specialty

Supplementary Figure 1a: Number of Grants, per Year, by Specialty

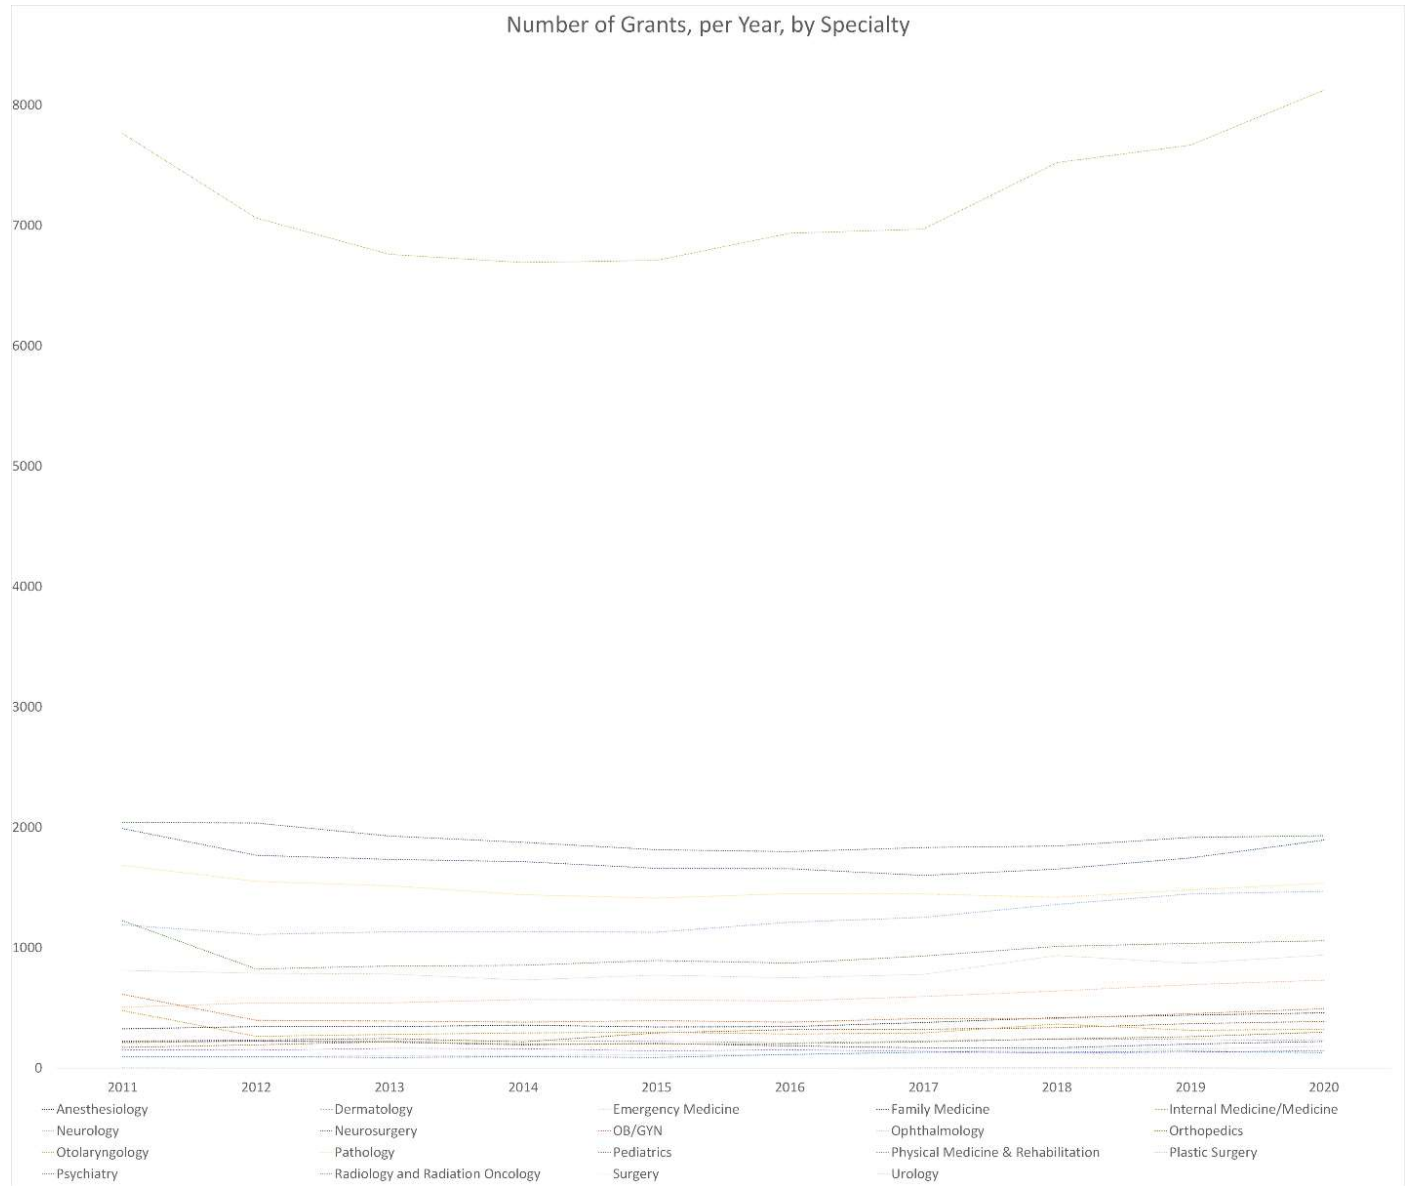

Supplementary Figure 1b: Number of Grants, per Year, by Specialty, without Internal Medicine/Medicine

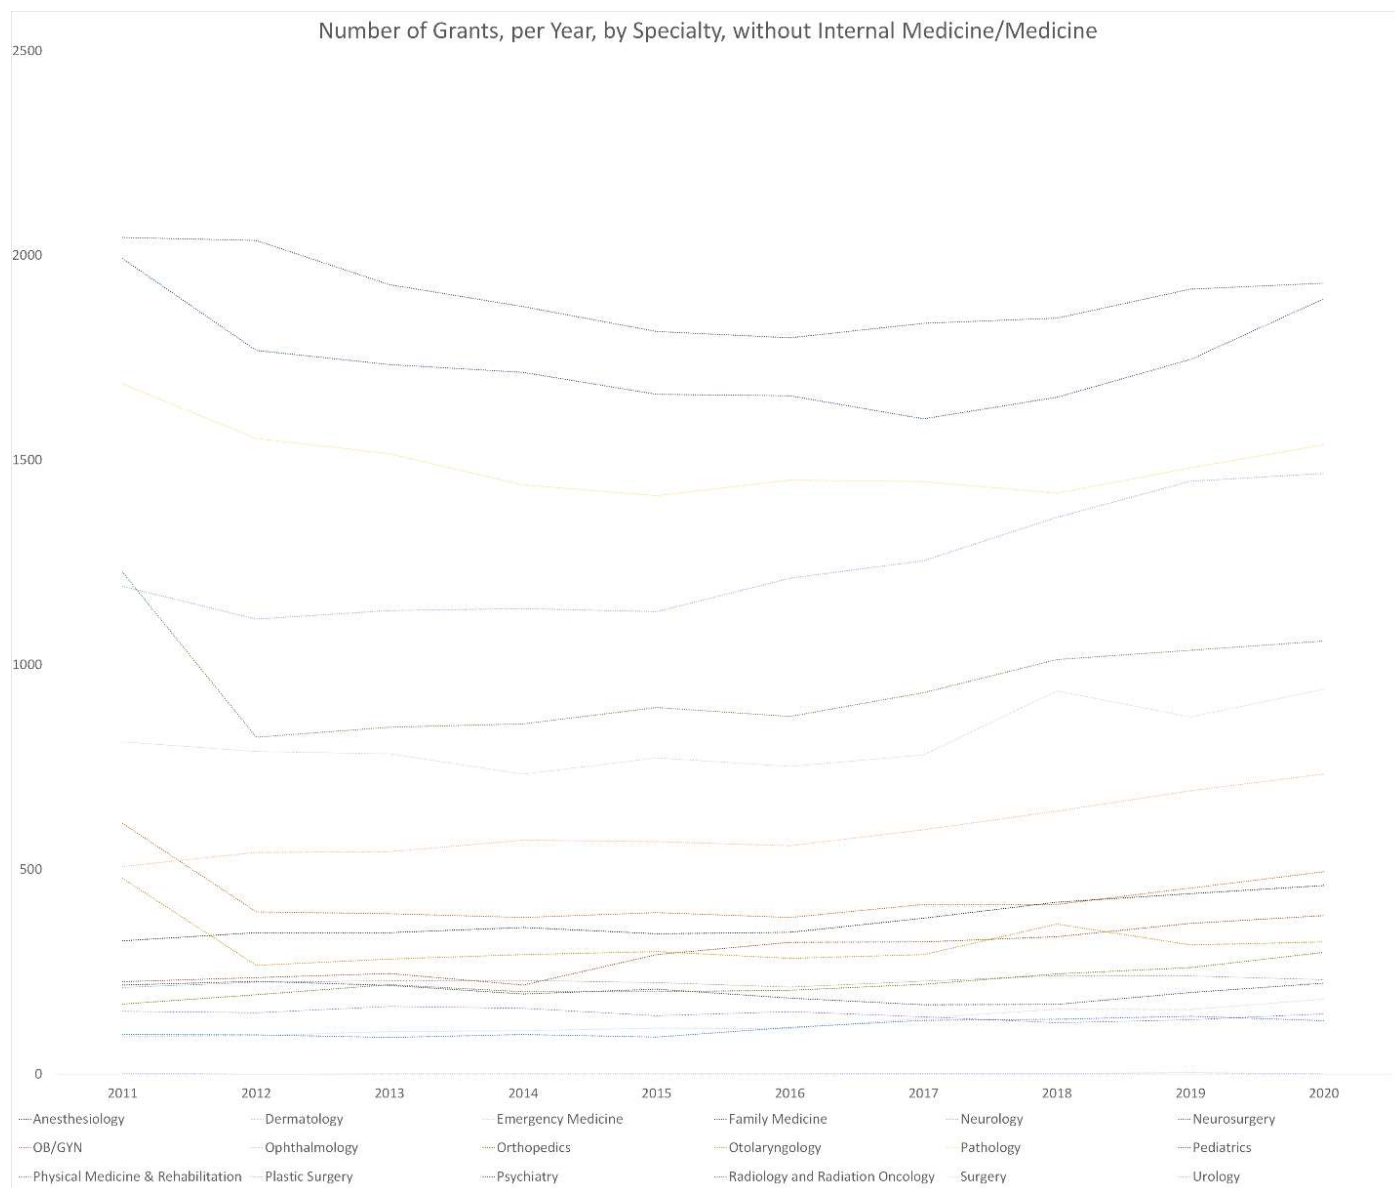



Supplementary Figure 2: Percent-Change in Number of Grants (compared to 2011), per Year, by Specialty

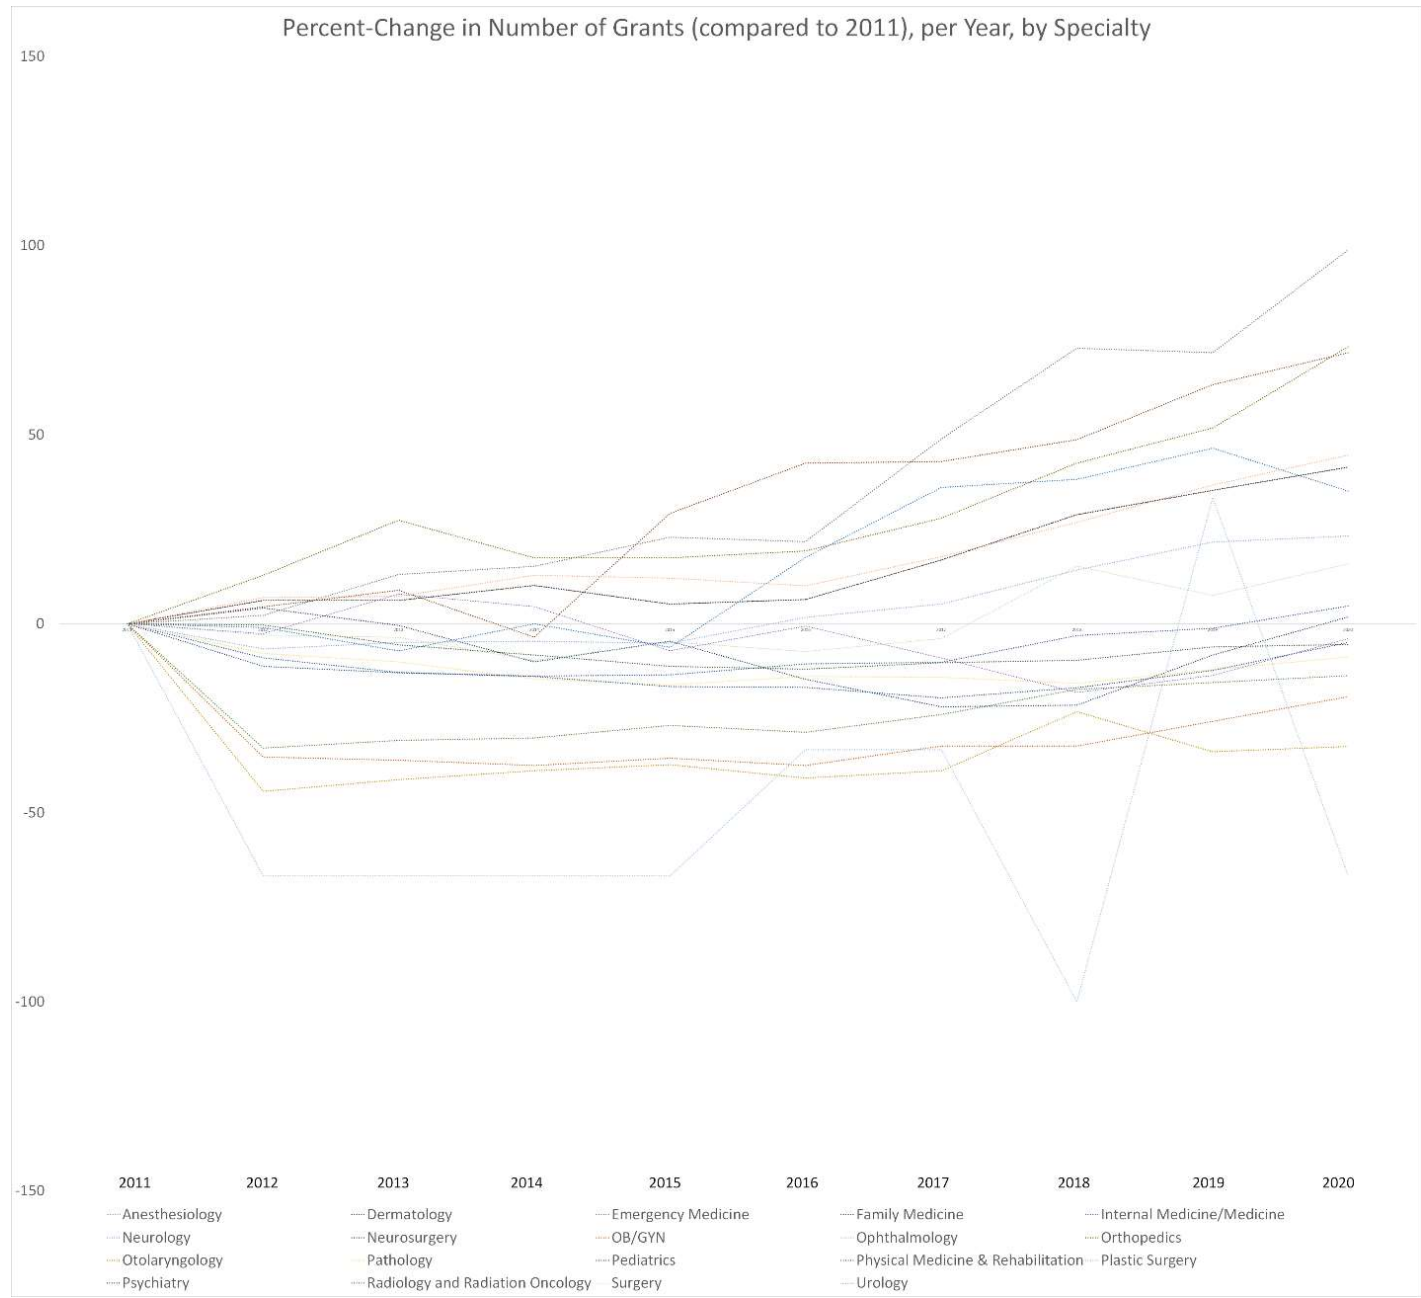

Supplementary Figure 3: F32 grant dollar-amount comparisons

### F32 grant dollar amount comparisons

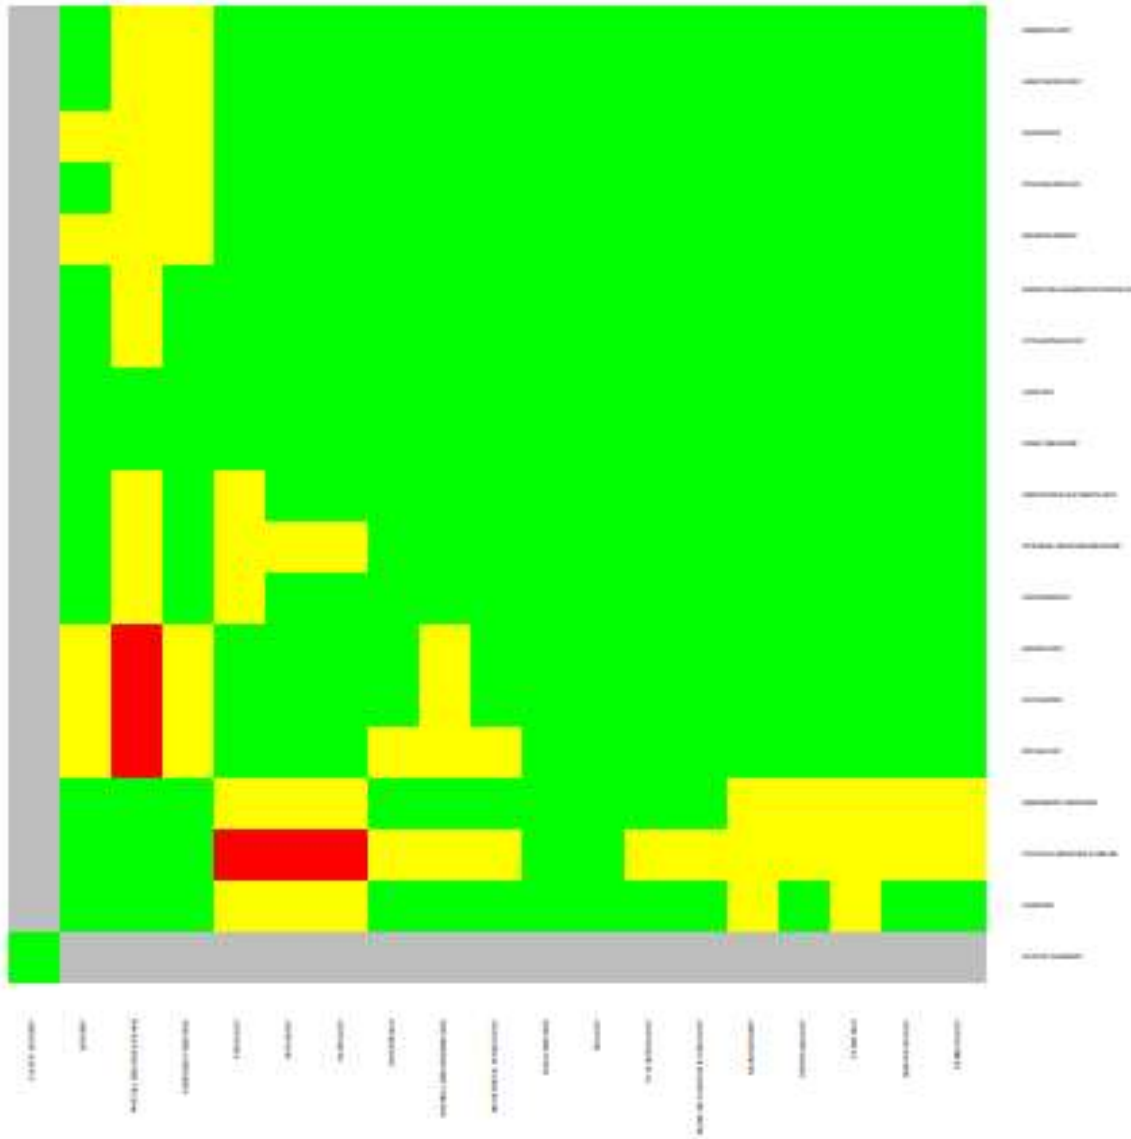

Supplementary Figure 4: K01 grant dollar-amount comparisons

### K01 grant dollar amount comparisons

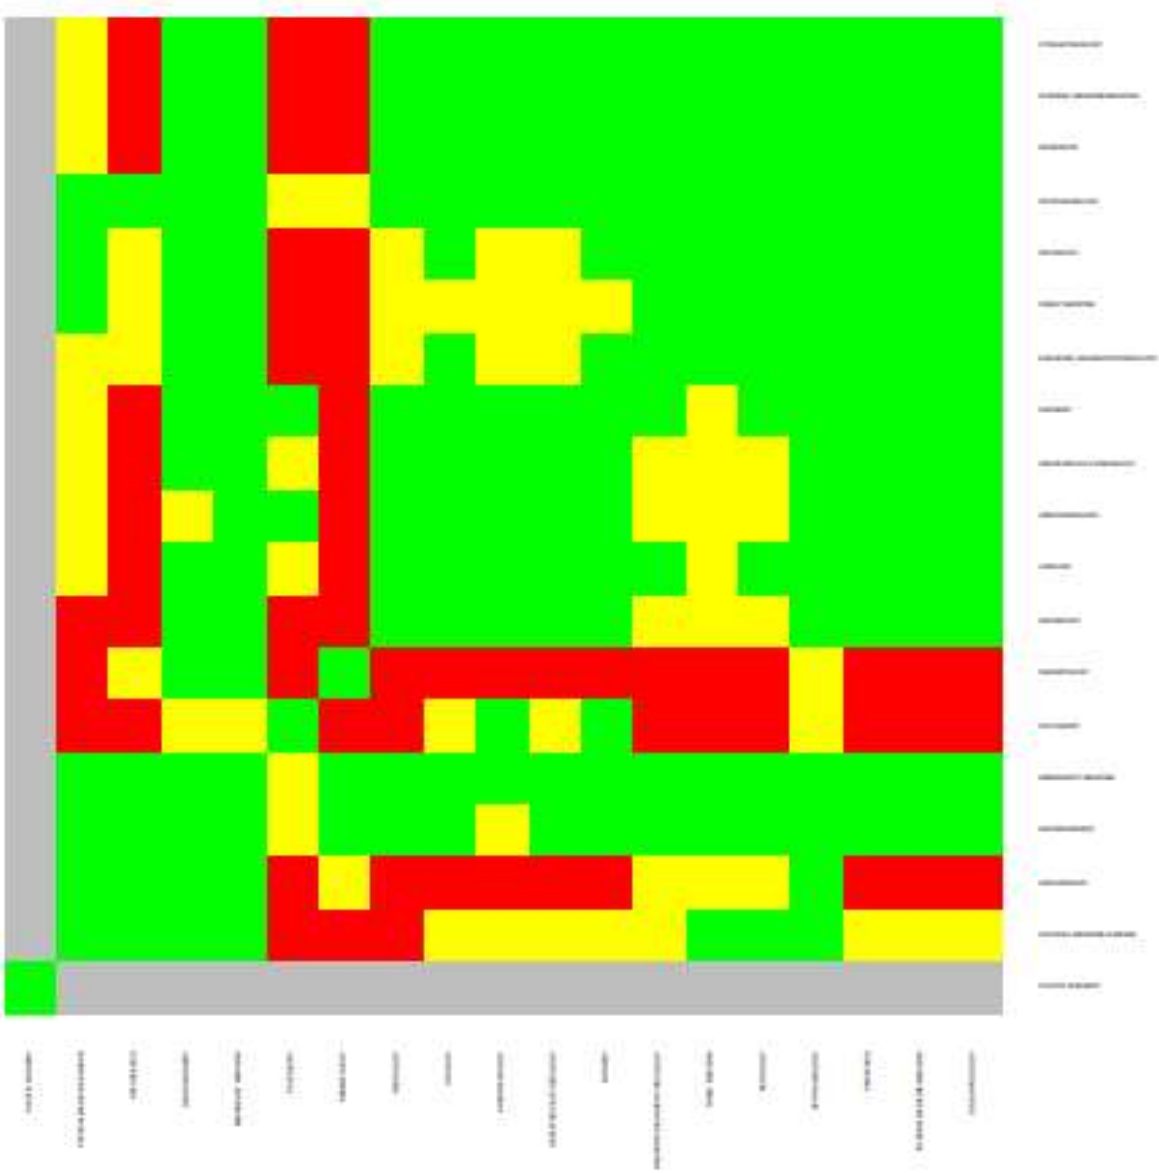

Supplementary Figure 5: K08 grant dollar amount comparisons

### K08 grant dollar amount comparisons

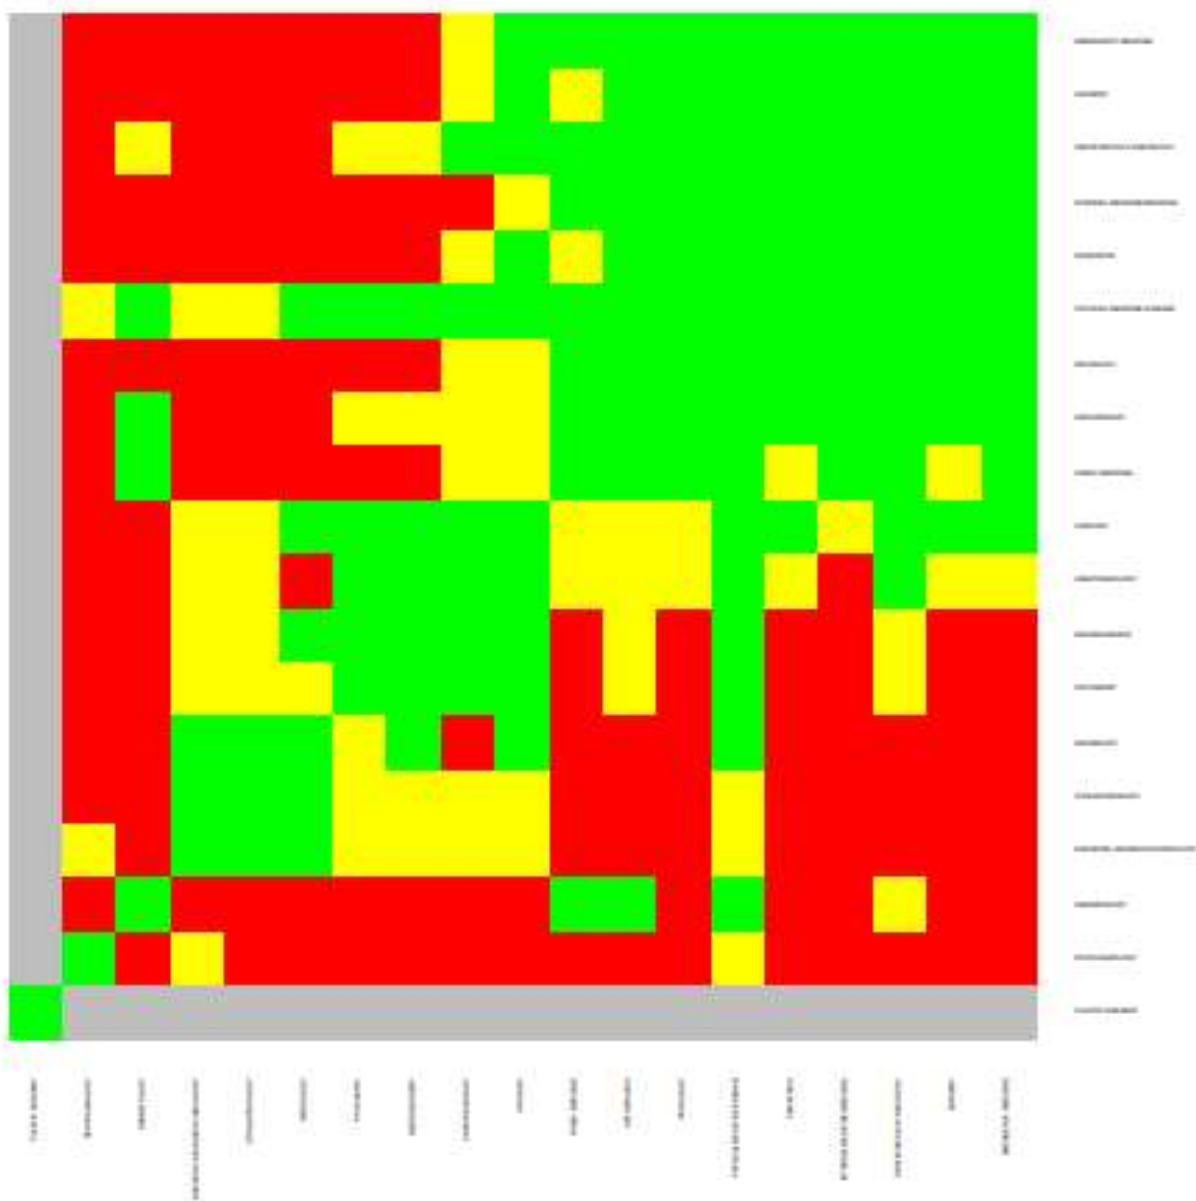





Supplementary Figure 8: R01 grant dollar-amount comparisons

### R01 grant dollar amount comparisons

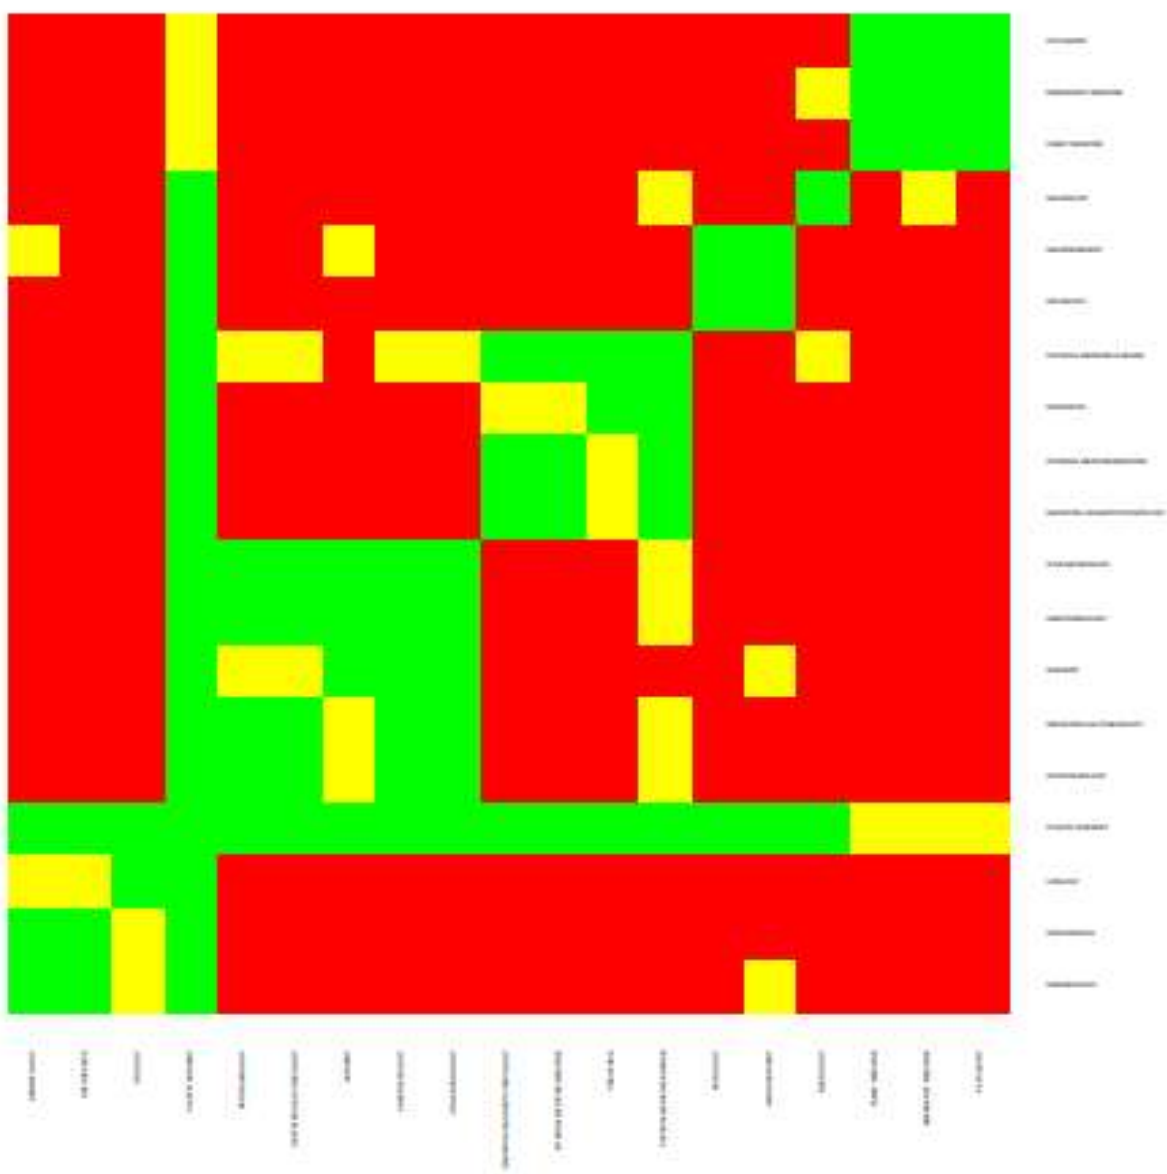

Supplementary Figure 9: R03 grant dollar-amount comparisons

### R03 grant dollar amount comparisons

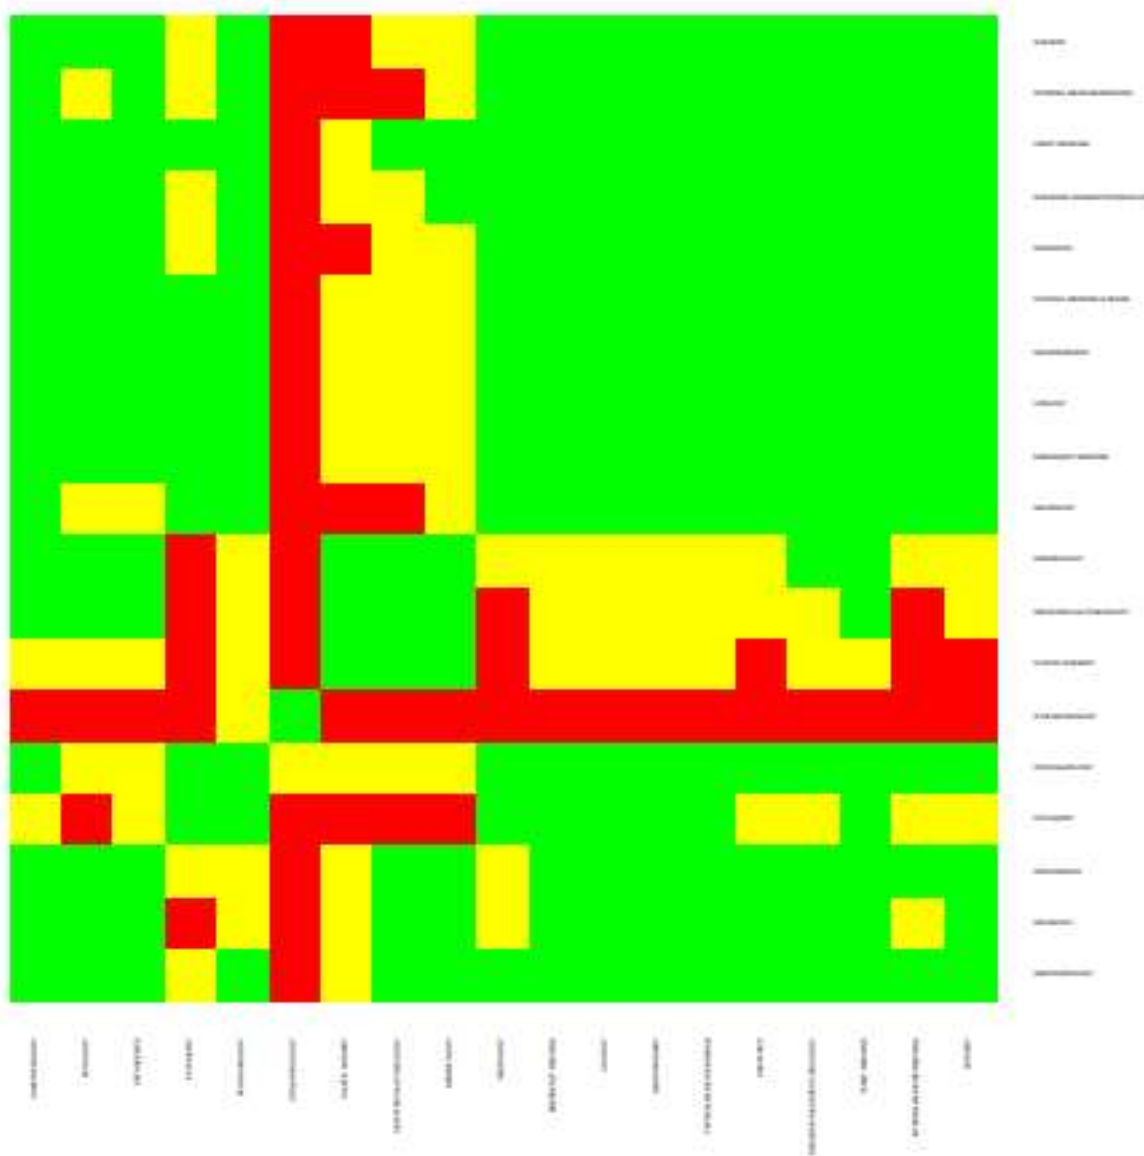



Supplementary Figure 10: R21 grant dollar-amount comparisons

### R21 grant dollar amount comparisons

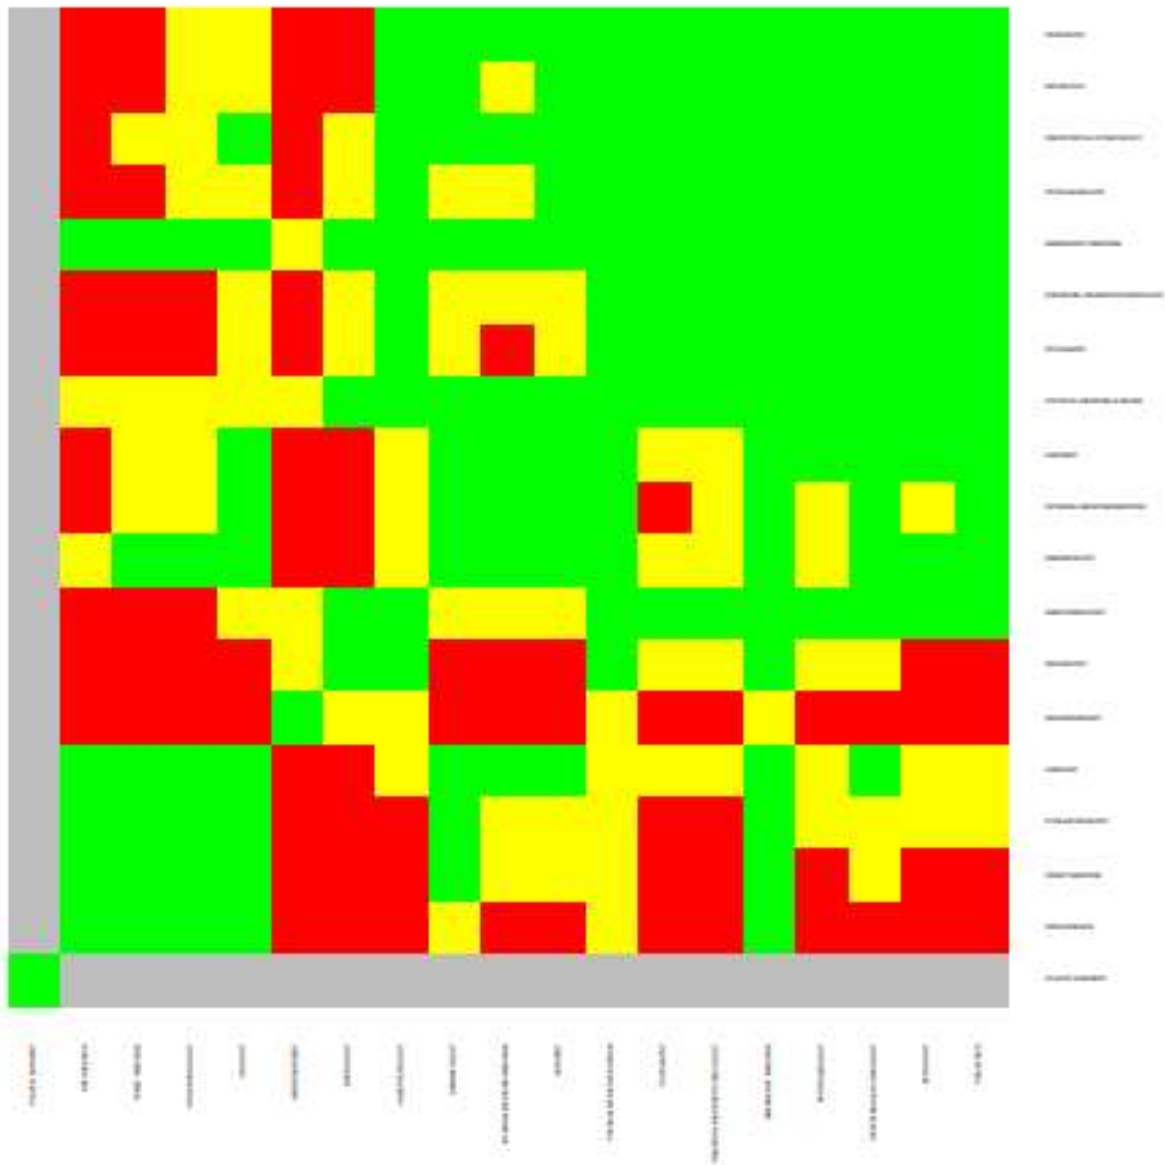

Supplementary Figure 11: T32 grant dollar-amount comparisons

### T32 grant dollar amount comparisons

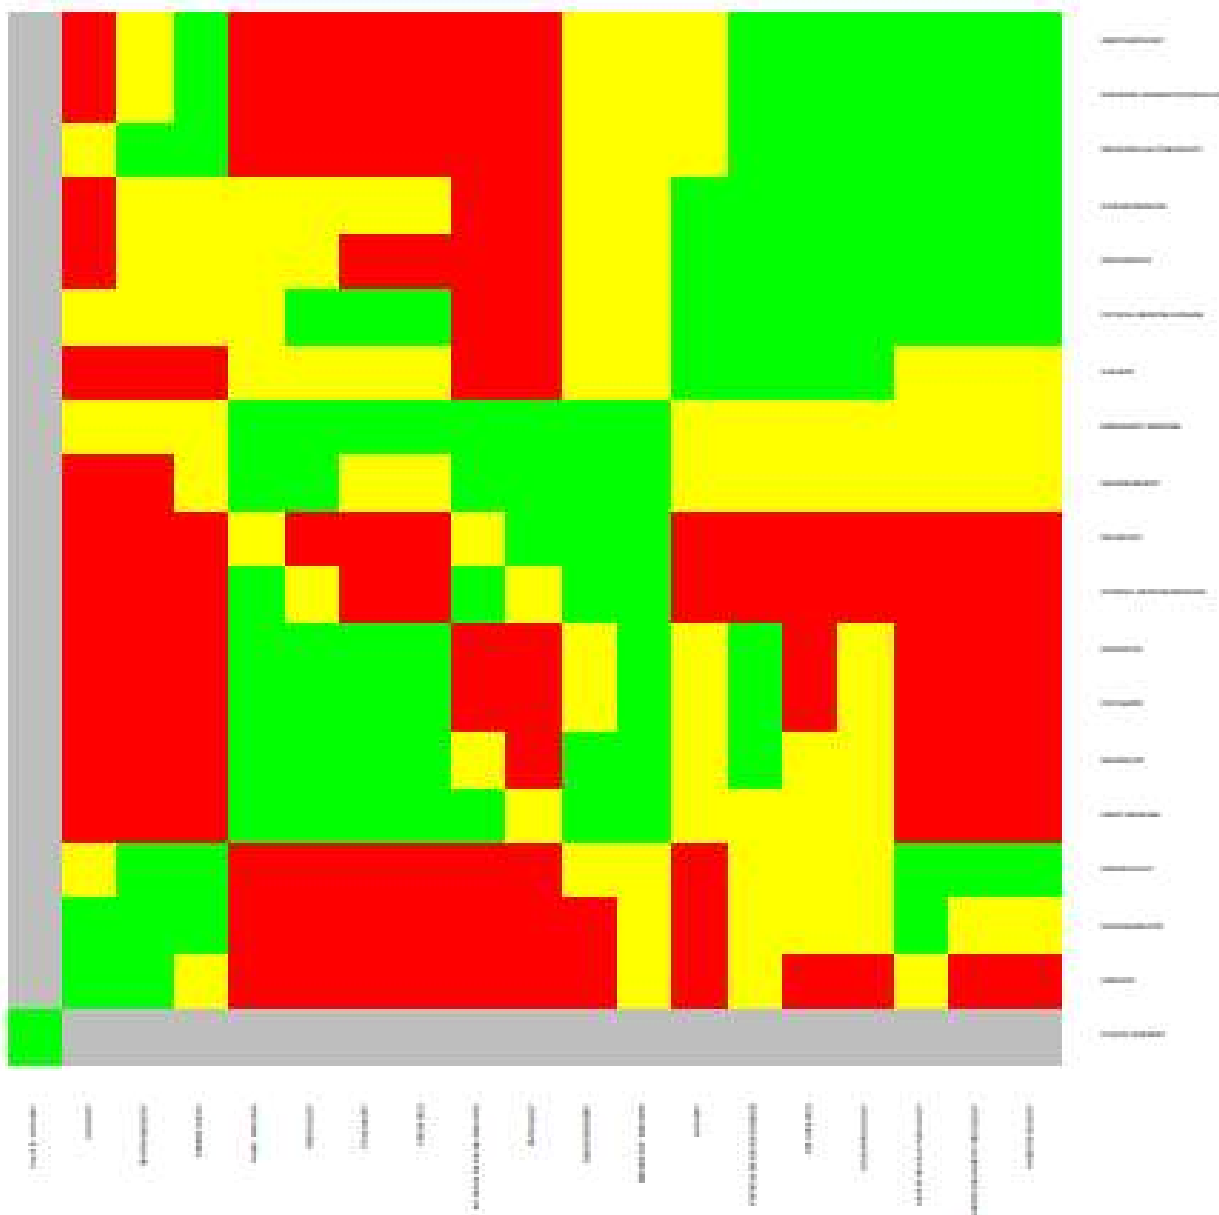



Supplementary Table 1: Number of active physicians by specialty, 2010-2020

| Specialty      | Year | Number of physicians |
|----------------|------|----------------------|
| ANESTHESIOLOGY | 2010 | 40123                |
| ANESTHESIOLOGY | 2011 | 40335                |
| ANESTHESIOLOGY | 2012 | 40546                |
| ANESTHESIOLOGY | 2013 | 40758                |
| ANESTHESIOLOGY | 2014 | 41055                |
| ANESTHESIOLOGY | 2015 | 41351                |
| ANESTHESIOLOGY | 2016 | 41557                |
| ANESTHESIOLOGY | 2017 | 41762                |
| ANESTHESIOLOGY | 2018 | 42015                |
| ANESTHESIOLOGY | 2019 | 42267                |
| ANESTHESIOLOGY | 2020 | 42267                |
| DERMATOLOGY    | 2010 | 10820                |
| DERMATOLOGY    | 2011 | 11001                |
| DERMATOLOGY    | 2012 | 11182                |
| DERMATOLOGY    | 2013 | 11363                |
| DERMATOLOGY    | 2014 | 11535                |
| DERMATOLOGY    | 2015 | 11706                |
| DERMATOLOGY    | 2016 | 11879                |
| DERMATOLOGY    | 2017 | 12051                |
| DERMATOLOGY    | 2018 | 12284                |
| DERMATOLOGY    | 2019 | 12516                |
| DERMATOLOGY    | 2020 | 12516                |

|    |                            |      |        |
|----|----------------------------|------|--------|
| 1  |                            |      |        |
| 2  |                            |      |        |
| 3  | EMERGENCY MEDICINE         | 2010 | 33984  |
| 4  |                            |      |        |
| 5  | EMERGENCY MEDICINE         | 2011 | 35070  |
| 6  |                            |      |        |
| 7  | EMERGENCY MEDICINE         | 2012 | 36155  |
| 8  |                            |      |        |
| 9  | EMERGENCY MEDICINE         | 2013 | 37241  |
| 10 |                            |      |        |
| 11 | EMERGENCY MEDICINE         | 2014 | 38410  |
| 12 |                            |      |        |
| 13 | EMERGENCY MEDICINE         | 2015 | 39579  |
| 14 |                            |      |        |
| 15 | EMERGENCY MEDICINE         | 2016 | 40964  |
| 16 |                            |      |        |
| 17 | EMERGENCY MEDICINE         | 2017 | 42348  |
| 18 |                            |      |        |
| 19 | EMERGENCY MEDICINE         | 2018 | 43775  |
| 20 | EMERGENCY MEDICINE         | 2019 | 45202  |
| 21 |                            |      |        |
| 22 | EMERGENCY MEDICINE         | 2020 | 45202  |
| 23 |                            |      |        |
| 24 | FAMILY MEDICINE            | 2010 | 106549 |
| 25 |                            |      |        |
| 26 | FAMILY MEDICINE            | 2011 | 107338 |
| 27 |                            |      |        |
| 28 | FAMILY MEDICINE            | 2012 | 108128 |
| 29 |                            |      |        |
| 30 | FAMILY MEDICINE            | 2013 | 108917 |
| 31 | FAMILY MEDICINE            | 2014 | 110106 |
| 32 |                            |      |        |
| 33 | FAMILY MEDICINE            | 2015 | 111295 |
| 34 |                            |      |        |
| 35 | FAMILY MEDICINE            | 2016 | 112405 |
| 36 |                            |      |        |
| 37 | FAMILY MEDICINE            | 2017 | 113514 |
| 38 |                            |      |        |
| 39 | FAMILY MEDICINE            | 2018 | 115856 |
| 40 |                            |      |        |
| 41 | FAMILY MEDICINE            | 2019 | 118198 |
| 42 | FAMILY MEDICINE            | 2020 | 118198 |
| 43 | INTERNAL MEDICINE/MEDICINE | 2010 | 109048 |
| 44 | INTERNAL MEDICINE/MEDICINE | 2011 | 109714 |
| 45 |                            |      |        |
| 46 | INTERNAL MEDICINE/MEDICINE | 2012 | 110381 |
| 47 |                            |      |        |
| 48 | INTERNAL MEDICINE/MEDICINE | 2013 | 111047 |
| 49 |                            |      |        |
| 50 | INTERNAL MEDICINE/MEDICINE | 2014 | 112568 |
| 51 |                            |      |        |
| 52 | INTERNAL MEDICINE/MEDICINE | 2015 | 114089 |
| 53 |                            |      |        |
| 54 | INTERNAL MEDICINE/MEDICINE | 2016 | 114823 |
| 55 |                            |      |        |
| 56 | INTERNAL MEDICINE/MEDICINE | 2017 | 115557 |
| 57 |                            |      |        |
| 58 |                            |      |        |
| 59 |                            |      |        |
| 60 |                            |      |        |

|                            |      |        |
|----------------------------|------|--------|
| INTERNAL MEDICINE/MEDICINE | 2018 | 117864 |
| INTERNAL MEDICINE/MEDICINE | 2019 | 120171 |
| INTERNAL MEDICINE/MEDICINE | 2020 | 120171 |
| NEUROLOGY                  | 2010 | 12916  |
| NEUROLOGY                  | 2011 | 12996  |
| NEUROLOGY                  | 2012 | 13076  |
| NEUROLOGY                  | 2013 | 13156  |
| NEUROLOGY                  | 2014 | 13274  |
| NEUROLOGY                  | 2015 | 13392  |
| NEUROLOGY                  | 2016 | 13555  |
| NEUROLOGY                  | 2017 | 13717  |
| NEUROLOGY                  | 2018 | 13932  |
| NEUROLOGY                  | 2019 | 14146  |
| NEUROLOGY                  | 2020 | 14146  |
| NEUROSURGERY               | 2010 | 5047   |
| NEUROSURGERY               | 2011 | 5088   |
| NEUROSURGERY               | 2012 | 5130   |
| NEUROSURGERY               | 2013 | 5171   |
| NEUROSURGERY               | 2014 | 5259   |
| NEUROSURGERY               | 2015 | 5346   |
| NEUROSURGERY               | 2016 | 5439   |
| NEUROSURGERY               | 2017 | 5531   |
| NEUROSURGERY               | 2018 | 5640   |
| NEUROSURGERY               | 2019 | 5748   |
| NEUROSURGERY               | 2020 | 5748   |
| OBSTETRICS & GYNECOLOGY    | 2010 | 40377  |
| OBSTETRICS & GYNECOLOGY    | 2011 | 40527  |
| OBSTETRICS & GYNECOLOGY    | 2012 | 40676  |
| OBSTETRICS & GYNECOLOGY    | 2013 | 40826  |
| OBSTETRICS & GYNECOLOGY    | 2014 | 41154  |
| OBSTETRICS & GYNECOLOGY    | 2015 | 41481  |
| OBSTETRICS & GYNECOLOGY    | 2016 | 41569  |

|    |                         |      |       |
|----|-------------------------|------|-------|
| 1  |                         |      |       |
| 2  |                         |      |       |
| 3  | OBSTETRICS & GYNECOLOGY | 2017 | 41656 |
| 4  |                         |      |       |
| 5  | OBSTETRICS & GYNECOLOGY | 2018 | 42188 |
| 6  |                         |      |       |
| 7  | OBSTETRICS & GYNECOLOGY | 2019 | 42720 |
| 8  |                         |      |       |
| 9  | OBSTETRICS & GYNECOLOGY | 2020 | 42720 |
| 10 | OPHTHALMOLOGY           | 2010 | 17943 |
| 11 | OPHTHALMOLOGY           | 2011 | 18068 |
| 12 | OPHTHALMOLOGY           | 2012 | 18192 |
| 13 | OPHTHALMOLOGY           | 2013 | 18317 |
| 14 | OPHTHALMOLOGY           | 2014 | 18455 |
| 15 |                         |      |       |
| 16 | OPHTHALMOLOGY           | 2015 | 18593 |
| 17 | OPHTHALMOLOGY           | 2016 | 18705 |
| 18 | OPHTHALMOLOGY           | 2017 | 18817 |
| 19 | OPHTHALMOLOGY           | 2018 | 19065 |
| 20 |                         |      |       |
| 21 | OPHTHALMOLOGY           | 2019 | 19312 |
| 22 |                         |      |       |
| 23 | OPHTHALMOLOGY           | 2020 | 19312 |
| 24 |                         |      |       |
| 25 | ORTHOPEDICS             | 2010 | 19822 |
| 26 | ORTHOPEDICS             | 2011 | 19673 |
| 27 | ORTHOPEDICS             | 2012 | 19523 |
| 28 |                         |      |       |
| 29 | ORTHOPEDICS             | 2013 | 19374 |
| 30 | ORTHOPEDICS             | 2014 | 19260 |
| 31 | ORTHOPEDICS             | 2015 | 19145 |
| 32 |                         |      |       |
| 33 | ORTHOPEDICS             | 2016 | 19073 |
| 34 | ORTHOPEDICS             | 2017 | 19001 |
| 35 | ORTHOPEDICS             | 2018 | 19035 |
| 36 | ORTHOPEDICS             | 2019 | 19069 |
| 37 |                         |      |       |
| 38 | ORTHOPEDICS             | 2020 | 19069 |
| 39 |                         |      |       |
| 40 | OTOLARYNGOLOGY          | 2010 | 9232  |
| 41 | OTOLARYNGOLOGY          | 2011 | 9261  |
| 42 |                         |      |       |
| 43 | OTOLARYNGOLOGY          | 2012 | 9291  |
| 44 | OTOLARYNGOLOGY          | 2013 | 9320  |
| 45 |                         |      |       |
| 46 | OTOLARYNGOLOGY          | 2014 | 9366  |
| 47 | OTOLARYNGOLOGY          | 2015 | 9411  |
| 48 | OTOLARYNGOLOGY          | 2016 | 9469  |
| 49 |                         |      |       |
| 50 | OTOLARYNGOLOGY          | 2017 | 9526  |
| 51 |                         |      |       |
| 52 | OTOLARYNGOLOGY          | 2018 | 9652  |
| 53 | OTOLARYNGOLOGY          | 2019 | 9777  |
| 54 |                         |      |       |
| 55 |                         |      |       |
| 56 |                         |      |       |
| 57 |                         |      |       |
| 58 |                         |      |       |
| 59 |                         |      |       |
| 60 |                         |      |       |

|    |                           |      |       |
|----|---------------------------|------|-------|
| 1  |                           |      |       |
| 2  |                           |      |       |
| 3  | OTOLARYNGOLOGY            | 2020 | 9777  |
| 4  |                           |      |       |
| 5  | PATHOLOGY                 | 2010 | 14975 |
| 6  | PATHOLOGY                 | 2011 | 14553 |
| 7  | PATHOLOGY                 | 2012 | 14132 |
| 8  | PATHOLOGY                 | 2013 | 13710 |
| 9  | PATHOLOGY                 | 2014 | 13498 |
| 10 |                           |      |       |
| 11 | PATHOLOGY                 | 2015 | 13286 |
| 12 |                           |      |       |
| 13 | PATHOLOGY                 | 2016 | 13063 |
| 14 | PATHOLOGY                 | 2017 | 12839 |
| 15 | PATHOLOGY                 | 2018 | 12741 |
| 16 |                           |      |       |
| 17 | PATHOLOGY                 | 2019 | 12643 |
| 18 |                           |      |       |
| 19 | PATHOLOGY                 | 2020 | 12643 |
| 20 |                           |      |       |
| 21 | PEDIATRICS                | 2010 | 55509 |
| 22 | PEDIATRICS                | 2011 | 55760 |
| 23 |                           |      |       |
| 24 | PEDIATRICS                | 2012 | 56011 |
| 25 |                           |      |       |
| 26 | PEDIATRICS                | 2013 | 56262 |
| 27 |                           |      |       |
| 28 | PEDIATRICS                | 2014 | 56903 |
| 29 |                           |      |       |
| 30 | PEDIATRICS                | 2015 | 57543 |
| 31 |                           |      |       |
| 32 | PEDIATRICS                | 2016 | 57989 |
| 33 | PEDIATRICS                | 2017 | 58435 |
| 34 | PEDIATRICS                | 2018 | 59527 |
| 35 | PEDIATRICS                | 2019 | 60618 |
| 36 | PEDIATRICS                | 2020 | 60618 |
| 37 |                           |      |       |
| 38 |                           |      |       |
| 39 | PHYSICAL MEDICINE & REHAB | 2010 | 8503  |
| 40 | PHYSICAL MEDICINE & REHAB | 2011 | 8637  |
| 41 |                           |      |       |
| 42 | PHYSICAL MEDICINE & REHAB | 2012 | 8772  |
| 43 |                           |      |       |
| 44 | PHYSICAL MEDICINE & REHAB | 2013 | 8906  |
| 45 | PHYSICAL MEDICINE & REHAB | 2014 | 9035  |
| 46 | PHYSICAL MEDICINE & REHAB | 2015 | 9164  |
| 47 | PHYSICAL MEDICINE & REHAB | 2016 | 9254  |
| 48 |                           |      |       |
| 49 | PHYSICAL MEDICINE & REHAB | 2017 | 9343  |
| 50 | PHYSICAL MEDICINE & REHAB | 2018 | 9555  |
| 51 | PHYSICAL MEDICINE & REHAB | 2019 | 9767  |
| 52 | PHYSICAL MEDICINE & REHAB | 2020 | 9767  |
| 53 | PLASTIC SURGERY           | 2010 | 6822  |
| 54 | PLASTIC SURGERY           | 2011 | 6862  |
| 55 |                           |      |       |
| 56 |                           |      |       |
| 57 |                           |      |       |
| 58 |                           |      |       |
| 59 |                           |      |       |
| 60 |                           |      |       |



|    |                                   |      |       |
|----|-----------------------------------|------|-------|
| 1  |                                   |      |       |
| 2  |                                   |      |       |
| 3  | PLASTIC SURGERY                   | 2012 | 6902  |
| 4  |                                   |      |       |
| 5  | PLASTIC SURGERY                   | 2013 | 6942  |
| 6  | PLASTIC SURGERY                   | 2014 | 6981  |
| 7  | PLASTIC SURGERY                   | 2015 | 7020  |
| 8  | PLASTIC SURGERY                   | 2016 | 7081  |
| 9  |                                   |      |       |
| 10 | PLASTIC SURGERY                   | 2017 | 7142  |
| 11 | PLASTIC SURGERY                   | 2018 | 7230  |
| 12 | PLASTIC SURGERY                   | 2019 | 7317  |
| 13 |                                   |      |       |
| 14 | PLASTIC SURGERY                   | 2020 | 7317  |
| 15 |                                   |      |       |
| 16 | PSYCHIATRY                        | 2010 | 38289 |
| 17 | PSYCHIATRY                        | 2011 | 37958 |
| 18 | PSYCHIATRY                        | 2012 | 37627 |
| 19 | PSYCHIATRY                        | 2013 | 37296 |
| 20 | PSYCHIATRY                        | 2014 | 37516 |
| 21 | PSYCHIATRY                        | 2015 | 37736 |
| 22 | PSYCHIATRY                        | 2016 | 37971 |
| 23 | PSYCHIATRY                        | 2017 | 38205 |
| 24 | PSYCHIATRY                        | 2018 | 38499 |
| 25 | PSYCHIATRY                        | 2019 | 38792 |
| 26 | PSYCHIATRY                        | 2020 | 38792 |
| 27 |                                   |      |       |
| 28 | RADIATION-<br>DIAGNOSTIC/ONCOLOGY | 2010 | 32445 |
| 29 |                                   |      |       |
| 30 | RADIATION-<br>DIAGNOSTIC/ONCOLOGY | 2011 | 34213 |
| 31 | RADIATION-<br>DIAGNOSTIC/ONCOLOGY | 2012 | 35982 |
| 32 | RADIATION-<br>DIAGNOSTIC/ONCOLOGY | 2013 | 37750 |
| 33 | RADIATION-<br>DIAGNOSTIC/ONCOLOGY | 2014 | 38191 |
| 34 | RADIATION-<br>DIAGNOSTIC/ONCOLOGY | 2015 | 38632 |
| 35 | RADIATION-<br>DIAGNOSTIC/ONCOLOGY | 2016 | 39239 |
| 36 | RADIATION-<br>DIAGNOSTIC/ONCOLOGY | 2017 | 39846 |
| 37 | RADIATION-<br>DIAGNOSTIC/ONCOLOGY | 2018 | 40572 |
| 38 | RADIATION-<br>DIAGNOSTIC/ONCOLOGY | 2019 | 41297 |
| 39 | RADIATION-<br>DIAGNOSTIC/ONCOLOGY | 2020 | 41297 |
| 40 |                                   |      |       |
| 41 |                                   |      |       |
| 42 |                                   |      |       |
| 43 |                                   |      |       |
| 44 |                                   |      |       |
| 45 |                                   |      |       |
| 46 |                                   |      |       |
| 47 |                                   |      |       |
| 48 |                                   |      |       |
| 49 |                                   |      |       |
| 50 |                                   |      |       |
| 51 |                                   |      |       |
| 52 |                                   |      |       |
| 53 |                                   |      |       |
| 54 |                                   |      |       |
| 55 |                                   |      |       |
| 56 |                                   |      |       |
| 57 |                                   |      |       |
| 58 |                                   |      |       |
| 59 |                                   |      |       |
| 60 |                                   |      |       |

|         |      |       |
|---------|------|-------|
| SURGERY | 2010 | 26314 |
| SURGERY | 2011 | 25938 |
| SURGERY | 2012 | 25563 |
| SURGERY | 2013 | 25187 |
| SURGERY | 2014 | 25221 |
| SURGERY | 2015 | 25254 |
| SURGERY | 2016 | 25148 |
| SURGERY | 2017 | 25042 |
| SURGERY | 2018 | 25303 |
| SURGERY | 2019 | 25564 |
| SURGERY | 2020 | 25564 |
| UROLOGY | 2010 | 9826  |
| UROLOGY | 2011 | 9808  |
| UROLOGY | 2012 | 9789  |
| UROLOGY | 2013 | 9771  |
| UROLOGY | 2014 | 9790  |
| UROLOGY | 2015 | 9808  |
| UROLOGY | 2016 | 9865  |
| UROLOGY | 2017 | 9921  |
| UROLOGY | 2018 | 10061 |
| UROLOGY | 2019 | 10201 |
| UROLOGY | 2020 | 10201 |

Supplementary Table 2: Number of NIH R01 grants awarded from 2011-2020, by specialty

| Year                              | 2011 | 2012 | 2013 | 2014 | 2015 | 2016 | 2017 | 2018 | 2019 | 2020 |
|-----------------------------------|------|------|------|------|------|------|------|------|------|------|
| Anesthesiology                    | 199  | 214  | 214  | 227  | 212  | 211  | 217  | 250  | 250  | 264  |
| Dermatology                       | 115  | 124  | 126  | 116  | 116  | 111  | 106  | 121  | 124  | 110  |
| Emergency<br>Medicine             | 26   | 30   | 30   | 33   | 39   | 38   | 42   | 49   | 54   | 74   |
| Family Medicine                   | 77   | 85   | 76   | 68   | 77   | 71   | 70   | 75   | 89   | 99   |
| Internal<br>Medicine/Medici<br>ne | 3250 | 3114 | 2917 | 2831 | 2804 | 2903 | 3026 | 3184 | 3317 | 3455 |
| Neurology                         | 520  | 551  | 538  | 522  | 528  | 540  | 563  | 639  | 664  | 704  |
| Neurosurgery                      | 138  | 141  | 140  | 131  | 161  | 166  | 175  | 190  | 204  | 223  |

|                               |      |     |     |     |     |     |     |     |     |     |
|-------------------------------|------|-----|-----|-----|-----|-----|-----|-----|-----|-----|
| Obstetrics and Gynecology     | 145  | 133 | 139 | 131 | 132 | 154 | 177 | 171 | 207 | 231 |
| Ophthalmology                 | 340  | 362 | 351 | 371 | 358 | 349 | 380 | 408 | 436 | 468 |
| Orthopedics                   | 111  | 119 | 134 | 124 | 121 | 131 | 138 | 141 | 152 | 178 |
| Otolaryngology                | 142  | 149 | 159 | 157 | 164 | 157 | 152 | 178 | 196 | 188 |
| Pathology                     | 928  | 881 | 851 | 773 | 762 | 749 | 710 | 774 | 822 | 860 |
| Pediatrics                    | 769  | 803 | 777 | 764 | 715 | 715 | 679 | 720 | 734 | 791 |
| Physical Medicine & Rehab     | 31   | 35  | 33  | 37  | 34  | 42  | 50  | 60  | 61  | 60  |
| Plastic Surgery               | 3    | 0   | 1   | 1   | 0   | 0   | 1   | 0   | 1   | 0   |
| Psychiatry                    | 1010 | 990 | 904 | 896 | 822 | 846 | 864 | 899 | 903 | 932 |
| Radiation-Diagnostic/Oncology | 529  | 516 | 526 | 495 | 503 | 499 | 526 | 607 | 604 | 619 |
| Surgery                       | 413  | 390 | 369 | 359 | 360 | 350 | 384 | 412 | 449 | 489 |
| Urology                       | 78   | 77  | 83  | 76  | 63  | 60  | 61  | 60  | 61  | 67  |

Supplementary Table 3: Number of NIH R03 grants awarded from 2011-2020, by specialty

| <b>R03</b>                 | <b>2011</b> | <b>2012</b> | <b>2013</b> | <b>2014</b> | <b>2015</b> | <b>2016</b> | <b>2017</b> | <b>2018</b> | <b>2019</b> | <b>2020</b> |
|----------------------------|-------------|-------------|-------------|-------------|-------------|-------------|-------------|-------------|-------------|-------------|
| Anesthesiology             | 6           | 9           | 6           | 6           | 4           | 4           | 6           | 9           | 8           | 5           |
| Dermatology                | 5           | 6           | 2           | 4           | 8           | 9           | 7           | 4           | 4           | 5           |
| Emergency Medicine         | 1           | 1           | 1           | 1           | 4           | 4           | 5           | 4           | 2           | 4           |
| Family Medicine            | 8           | 9           | 9           | 7           | 6           | 5           | 2           | 2           | 5           | 3           |
| Internal Medicine/Medicine | 118         | 139         | 132         | 124         | 110         | 90          | 91          | 102         | 120         | 121         |
| Neurology                  | 10          | 9           | 11          | 12          | 13          | 16          | 15          | 15          | 15          | 13          |
| Neurosurgery               | 3           | 8           | 8           | 5           | 7           | 4           | 2           | 2           | 2           | 6           |

|                               |    |    |    |    |    |    |    |    |    |    |
|-------------------------------|----|----|----|----|----|----|----|----|----|----|
| Obstetrics and Gynecology     | 8  | 12 | 10 | 12 | 10 | 11 | 15 | 17 | 14 | 10 |
| Ophthalmology                 | 0  | 0  | 0  | 2  | 3  | 1  | 1  | 2  | 3  | 3  |
| Orthopedics                   | 10 | 10 | 12 | 14 | 10 | 7  | 3  | 3  | 7  | 7  |
| Otolaryngology                | 13 | 18 | 19 | 15 | 14 | 12 | 12 | 10 | 2  | 3  |
| Pathology                     | 25 | 23 | 21 | 20 | 15 | 9  | 12 | 21 | 26 | 25 |
| Pediatrics                    | 38 | 29 | 35 | 34 | 34 | 43 | 35 | 41 | 38 | 35 |
| Physical Medicine & Rehab     | 7  | 7  | 5  | 7  | 5  | 5  | 3  | 4  | 7  | 8  |
| Plastic Surgery               | 0  | 0  | 0  | 0  | 0  | 1  | 1  | 0  | 0  | 0  |
| Psychiatry                    | 25 | 28 | 30 | 22 | 20 | 23 | 29 | 23 | 20 | 16 |
| Radiation-Diagnostic/Oncology | 8  | 7  | 10 | 17 | 21 | 9  | 11 | 18 | 22 | 22 |
| Surgery                       | 15 | 20 | 17 | 17 | 19 | 14 | 25 | 21 | 11 | 15 |
| Urology                       | 1  | 3  | 2  | 4  | 5  | 3  | 1  | 1  | 3  | 4  |

Supplementary Table 4: Number of NIH R21 grants awarded from 2011-2020, by specialty

|                            | 2011 | 2012 | 2013 | 2014 | 2015 | 2016 | 2017 | 2018 | 2019 | 2020 |
|----------------------------|------|------|------|------|------|------|------|------|------|------|
| Anesthesiology             | 27   | 24   | 27   | 21   | 28   | 27   | 26   | 37   | 39   | 33   |
| Dermatology                | 19   | 18   | 18   | 26   | 21   | 14   | 15   | 16   | 15   | 20   |
| Emergency Medicine         | 6    | 5    | 3    | 5    | 6    | 5    | 7    | 10   | 6    | 5    |
| Family Medicine            | 14   | 16   | 19   | 20   | 24   | 23   | 14   | 12   | 16   | 16   |
| Internal Medicine/Medicine | 375  | 407  | 393  | 368  | 379  | 394  | 375  | 376  | 377  | 385  |
| Neurology                  | 64   | 78   | 73   | 73   | 72   | 79   | 82   | 93   | 107  | 70   |
| Neurosurgery               | 13   | 18   | 22   | 21   | 35   | 36   | 27   | 26   | 41   | 33   |
| Obstetrics and Gynecology  | 33   | 28   | 27   | 25   | 24   | 24   | 21   | 28   | 33   | 43   |

|                               |     |     |     |     |     |     |     |     |     |     |
|-------------------------------|-----|-----|-----|-----|-----|-----|-----|-----|-----|-----|
| Ophthalmology                 | 21  | 19  | 30  | 29  | 36  | 34  | 24  | 31  | 51  | 52  |
| Orthopedics                   | 14  | 20  | 19  | 15  | 16  | 16  | 26  | 36  | 26  | 27  |
| Otolaryngology                | 14  | 16  | 21  | 28  | 23  | 14  | 15  | 31  | 30  | 33  |
| Pathology                     | 124 | 104 | 112 | 140 | 160 | 166 | 138 | 117 | 113 | 108 |
| Pediatrics                    | 104 | 95  | 102 | 108 | 121 | 123 | 116 | 118 | 127 | 132 |
| Physical Medicine & Rehab     | 4   | 7   | 11  | 9   | 4   | 9   | 13  | 10  | 13  | 9   |
| Plastic Surgery               | 0   | 0   | 0   | 0   | 0   | 0   | 0   | 0   | 0   | 0   |
| Psychiatry                    | 122 | 166 | 191 | 179 | 156 | 151 | 153 | 149 | 155 | 158 |
| Radiation-Diagnostic/Oncology | 97  | 101 | 102 | 115 | 121 | 118 | 115 | 89  | 103 | 101 |
| Surgery                       | 58  | 54  | 46  | 48  | 62  | 68  | 50  | 49  | 51  | 54  |
| Urology                       | 8   | 9   | 5   | 4   | 10  | 13  | 9   | 7   | 8   | 10  |

Supplementary Table 5: Number of NIH F32 grants awarded from 2011-2020, by specialty

|                            | 2011 | 2012 | 2013 | 2014 | 2015 | 2016 | 2017 | 2018 | 2019 | 2020 |
|----------------------------|------|------|------|------|------|------|------|------|------|------|
| Anesthesiology             | 4    | 6    | 8    | 7    | 1    | 1    | 3    | 5    | 2    | 6    |
| Dermatology                | 4    | 4    | 3    | 2    | 3    | 3    | 5    | 4    | 1    | 3    |
| Emergency Medicine         | 1    | 1    | 1    | 0    | 0    | 0    | 0    | 0    | 0    | 1    |
| Family Medicine            | 0    | 0    | 0    | 1    | 1    | 0    | 0    | 0    | 0    | 0    |
| Internal Medicine/Medicine | 126  | 112  | 116  | 108  | 109  | 119  | 132  | 115  | 108  | 116  |
| Neurology                  | 15   | 10   | 20   | 31   | 29   | 23   | 29   | 27   | 29   | 22   |
| Neurosurgery               | 8    | 8    | 8    | 8    | 10   | 10   | 9    | 15   | 8    | 12   |
| Obstetrics and Gynecology  | 4    | 6    | 4    | 4    | 5    | 4    | 3    | 6    | 5    | 5    |
| Ophthalmology              | 4    | 7    | 7    | 9    | 12   | 8    | 10   | 7    | 9    | 10   |
| Orthopedics                | 5    | 6    | 5    | 5    | 6    | 6    | 6    | 7    | 7    | 7    |

|                               |    |    |    |    |    |    |    |    |    |    |
|-------------------------------|----|----|----|----|----|----|----|----|----|----|
| Otolaryngology                | 10 | 7  | 7  | 10 | 6  | 8  | 14 | 10 | 8  | 6  |
| Pathology                     | 22 | 17 | 22 | 22 | 23 | 25 | 24 | 17 | 16 | 13 |
| Pediatrics                    | 25 | 27 | 24 | 24 | 18 | 17 | 15 | 13 | 19 | 12 |
| Physical Medicine & Rehab     | 1  | 1  | 0  | 1  | 1  | 1  | 3  | 4  | 3  | 2  |
| Plastic Surgery               | 0  | 0  | 0  | 0  | 0  | 0  | 0  | 0  | 1  | 0  |
| Psychiatry                    | 39 | 29 | 28 | 26 | 27 | 29 | 29 | 25 | 29 | 32 |
| Radiation-Diagnostic/Oncology | 14 | 8  | 5  | 1  | 2  | 9  | 8  | 7  | 4  | 7  |
| Surgery                       | 17 | 15 | 13 | 19 | 21 | 20 | 17 | 20 | 15 | 15 |
| Urology                       | 2  | 2  | 2  | 5  | 2  | 3  | 3  | 1  | 1  | 1  |

Supplementary Table 6: Number of NIH T32 grants awarded from 2011-2020, by specialty

|                            | 2011 | 2012 | 2013 | 2014 | 2015 | 2016 | 2017 | 2018 | 2019 | 2020 |
|----------------------------|------|------|------|------|------|------|------|------|------|------|
| Anesthesiology             | 13   | 15   | 14   | 17   | 21   | 19   | 25   | 19   | 20   | 15   |
| Dermatology                | 12   | 12   | 12   | 11   | 11   | 11   | 11   | 10   | 7    | 8    |
| Emergency Medicine         | 0    | 0    | 0    | 0    | 0    | 1    | 2    | 2    | 2    | 2    |
| Family Medicine            | 5    | 4    | 6    | 5    | 4    | 4    | 9    | 5    | 4    | 5    |
| Internal Medicine/Medicine | 382  | 389  | 357  | 353  | 339  | 341  | 452  | 366  | 347  | 365  |
| Neurology                  | 37   | 34   | 32   | 32   | 29   | 30   | 38   | 36   | 35   | 37   |
| Neurosurgery               | 3    | 3    | 3    | 3    | 5    | 5    | 6    | 4    | 6    | 8    |
| Obstetrics and Gynecology  | 12   | 11   | 12   | 11   | 12   | 10   | 13   | 7    | 8    | 11   |
| Ophthalmology              | 15   | 16   | 21   | 19   | 17   | 18   | 27   | 22   | 26   | 23   |
| Orthopedics                | 8    | 9    | 8    | 7    | 7    | 7    | 8    | 7    | 7    | 8    |
| Otolaryngology             | 12   | 12   | 11   | 14   | 15   | 15   | 29   | 17   | 16   | 16   |
| Pathology                  | 86   | 75   | 70   | 79   | 68   | 70   | 89   | 67   | 59   | 55   |

|                               |     |    |    |    |    |    |     |    |    |    |
|-------------------------------|-----|----|----|----|----|----|-----|----|----|----|
| Pediatrics                    | 108 | 99 | 90 | 87 | 90 | 84 | 88  | 73 | 74 | 72 |
| Physical Medicine & Rehab     | 9   | 4  | 4  | 3  | 3  | 4  | 5   | 5  | 4  | 5  |
| Plastic Surgery               | 0   | 0  | 0  | 0  | 0  | 0  | 0   | 0  | 0  | 0  |
| Psychiatry                    | 77  | 79 | 80 | 79 | 71 | 71 | 107 | 69 | 68 | 71 |
| Radiation-Diagnostic/Oncology | 22  | 20 | 22 | 26 | 28 | 27 | 33  | 32 | 30 | 26 |
| Surgery                       | 54  | 56 | 54 | 48 | 48 | 49 | 57  | 53 | 58 | 55 |
| Urology                       | 7   | 8  | 7  | 8  | 5  | 6  | 4   | 2  | 4  | 4  |

Supplementary Table 7: Number of NIH K01 grants awarded from 2011-2020, by specialty

|                            | 2011 | 2012 | 2013 | 2014 | 2015 | 2016 | 2017 | 2018 | 2019 | 2020 |
|----------------------------|------|------|------|------|------|------|------|------|------|------|
| Anesthesiology             | 4    | 4    | 4    | 5    | 5    | 5    | 6    | 8    | 5    | 7    |
| Dermatology                | 4    | 4    | 6    | 4    | 6    | 7    | 11   | 13   | 10   | 8    |
| Emergency Medicine         | 0    | 1    | 1    | 1    | 2    | 0    | 0    | 1    | 1    | 2    |
| Family Medicine            | 11   | 13   | 10   | 7    | 7    | 8    | 8    | 9    | 9    | 15   |
| Internal Medicine/Medicine | 130  | 125  | 126  | 144  | 159  | 143  | 135  | 154  | 170  | 176  |
| Neurology                  | 12   | 13   | 16   | 17   | 17   | 19   | 20   | 19   | 23   | 19   |
| Neurosurgery               | 3    | 3    | 1    | 0    | 0    | 1    | 0    | 2    | 3    | 3    |
| Obstetrics and Gynecology  | 2    | 1    | 2    | 4    | 5    | 5    | 7    | 6    | 8    | 8    |
| Ophthalmology              | 0    | 0    | 0    | 1    | 0    | 0    | 1    | 2    | 2    | 1    |
| Orthopedics                | 5    | 4    | 7    | 7    | 10   | 7    | 6    | 5    | 6    | 5    |
| Otolaryngology             | 2    | 2    | 2    | 2    | 0    | 0    | 0    | 0    | 0    | 1    |
| Pathology                  | 13   | 14   | 15   | 14   | 13   | 12   | 13   | 16   | 17   | 21   |
| Pediatrics                 | 20   | 16   | 18   | 19   | 16   | 25   | 23   | 21   | 23   | 27   |
| Physical Medicine & Rehab  | 3    | 4    | 4    | 6    | 7    | 8    | 13   | 13   | 10   | 12   |
| Plastic Surgery            | 0    | 0    | 0    | 0    | 0    | 0    | 0    | 0    | 0    | 0    |

|                               |    |    |    |    |    |    |    |    |    |    |
|-------------------------------|----|----|----|----|----|----|----|----|----|----|
| Psychiatry                    | 81 | 84 | 76 | 75 | 72 | 67 | 70 | 65 | 72 | 81 |
| Radiation-Diagnostic/Oncology | 17 | 15 | 13 | 11 | 14 | 14 | 19 | 18 | 15 | 11 |
| Surgery                       | 8  | 7  | 11 | 7  | 10 | 12 | 13 | 9  | 8  | 7  |
| Urology                       | 1  | 1  | 1  | 1  | 3  | 4  | 6  | 5  | 5  | 6  |

Supplementary Table 8: Number of NIH K08 grants awarded from 2011-2020, by specialty

|                            | 2011 | 2012 | 2013 | 2014 | 2015 | 2016 | 2017 | 2018 | 2019 | 2020 |
|----------------------------|------|------|------|------|------|------|------|------|------|------|
| Anesthesiology             | 13   | 14   | 15   | 15   | 13   | 12   | 16   | 21   | 25   | 23   |
| Dermatology                | 18   | 19   | 17   | 16   | 15   | 12   | 14   | 11   | 14   | 10   |
| Emergency Medicine         | 2    | 4    | 7    | 4    | 5    | 7    | 7    | 8    | 7    | 7    |
| Family Medicine            | 5    | 5    | 5    | 2    | 1    | 1    | 1    | 1    | 3    | 3    |
| Internal Medicine/Medicine | 277  | 270  | 243  | 240  | 228  | 241  | 230  | 251  | 281  | 274  |
| Neurology                  | 39   | 36   | 39   | 33   | 37   | 33   | 31   | 30   | 35   | 39   |
| Neurosurgery               | 7    | 7    | 9    | 7    | 11   | 12   | 14   | 11   | 13   | 10   |
| Obstetrics and Gynecology  | 8    | 8    | 7    | 5    | 2    | 3    | 2    | 5    | 6    | 9    |
| Ophthalmology              | 24   | 24   | 29   | 29   | 30   | 28   | 27   | 27   | 25   | 25   |
| Orthopedics                | 1    | 2    | 4    | 4    | 4    | 5    | 7    | 7    | 7    | 7    |
| Otolaryngology             | 12   | 14   | 12   | 10   | 12   | 11   | 9    | 10   | 12   | 10   |
| Pathology                  | 38   | 33   | 36   | 33   | 32   | 24   | 25   | 28   | 27   | 30   |
| Pediatrics                 | 114  | 96   | 93   | 86   | 82   | 91   | 106  | 117  | 113  | 109  |
| Physical Medicine & Rehab  | 1    | 1    | 1    | 0    | 0    | 0    | 0    | 1    | 1    | 1    |
| Plastic Surgery            | 0    | 0    | 0    | 0    | 0    | 0    | 0    | 0    | 0    | 0    |
| Psychiatry                 | 34   | 31   | 21   | 28   | 22   | 23   | 25   | 23   | 19   | 24   |



|                               |    |    |    |    |    |    |    |    |    |    |
|-------------------------------|----|----|----|----|----|----|----|----|----|----|
| Radiation-Diagnostic/Oncology | 5  | 5  | 5  | 6  | 6  | 1  | 3  | 3  | 14 | 18 |
| Surgery                       | 59 | 57 | 50 | 46 | 38 | 38 | 39 | 44 | 45 | 48 |
| Urology                       | 8  | 8  | 11 | 7  | 4  | 5  | 5  | 5  | 5  | 5  |

Supplementary Table 9: Number of NIH K23 grants awarded from 2011-2020, by specialty

|                            | 2011 | 2012 | 2013 | 2014 | 2015 | 2016 | 2017 | 2018 | 2019 | 2020 |
|----------------------------|------|------|------|------|------|------|------|------|------|------|
| Anesthesiology             | 9    | 10   | 13   | 13   | 12   | 10   | 13   | 12   | 17   | 17   |
| Dermatology                | 3    | 4    | 3    | 1    | 3    | 4    | 4    | 9    | 10   | 8    |
| Emergency Medicine         | 18   | 15   | 15   | 14   | 15   | 19   | 21   | 19   | 20   | 15   |
| Family Medicine            | 9    | 8    | 6    | 3    | 6    | 4    | 5    | 5    | 6    | 7    |
| Internal Medicine/Medicine | 306  | 315  | 306  | 297  | 276  | 262  | 247  | 247  | 249  | 286  |
| Neurology                  | 61   | 59   | 48   | 50   | 52   | 43   | 48   | 53   | 58   | 57   |
| Neurosurgery               | 2    | 4    | 5    | 4    | 5    | 5    | 4    | 4    | 5    | 6    |
| Obstetrics and Gynecology  | 12   | 14   | 11   | 14   | 10   | 5    | 7    | 8    | 10   | 12   |
| Ophthalmology              | 15   | 11   | 13   | 11   | 13   | 20   | 21   | 21   | 21   | 20   |
| Orthopedics                | 2    | 3    | 3    | 3    | 2    | 2    | 1    | 3    | 3    | 4    |
| Otolaryngology             | 8    | 6    | 6    | 9    | 12   | 11   | 12   | 12   | 12   | 12   |
| Pathology                  | 4    | 3    | 2    | 3    | 2    | 1    | 1    | 1    | 1    | 3    |
| Pediatrics                 | 94   | 93   | 89   | 89   | 79   | 65   | 85   | 93   | 108  | 129  |
| Physical Medicine & Rehab  | 7    | 6    | 10   | 12   | 9    | 10   | 6    | 2    | 3    | 3    |
| Plastic Surgery            | 0    | 0    | 0    | 0    | 0    | 0    | 0    | 0    | 0    | 0    |
| Psychiatry                 | 119  | 117  | 104  | 99   | 100  | 93   | 102  | 103  | 110  | 113  |

|                               |    |    |    |    |    |    |   |   |   |    |
|-------------------------------|----|----|----|----|----|----|---|---|---|----|
| Radiation-Diagnostic/Oncology | 6  | 4  | 4  | 4  | 4  | 4  | 4 | 2 | 1 | 3  |
| Surgery                       | 13 | 12 | 11 | 11 | 10 | 10 | 9 | 8 | 9 | 13 |
| Urology                       | 2  | 1  | 2  | 3  | 2  | 3  | 2 | 1 | 3 | 3  |

Supplementary Table 10: Number of NIH U01 grants awarded from 2011-2020, by specialty

|                               | 2011 | 2012 | 2013 | 2014 | 2015 | 2016 | 2017 | 2018 | 2019 | 2020 |
|-------------------------------|------|------|------|------|------|------|------|------|------|------|
| Anesthesiology                | 7    | 7    | 7    | 12   | 9    | 15   | 14   | 15   | 12   | 13   |
| Dermatology                   | 3    | 5    | 7    | 6    | 8    | 5    | 5    | 6    | 9    | 11   |
| Emergency Medicine            | 10   | 13   | 17   | 14   | 8    | 5    | 4    | 8    | 3    | 7    |
| Family Medicine               | 11   | 14   | 12   | 11   | 15   | 15   | 13   | 15   | 15   | 10   |
| Internal Medicine/Medicine    | 386  | 399  | 432  | 381  | 417  | 414  | 439  | 491  | 564  | 589  |
| Neurology                     | 33   | 40   | 40   | 54   | 56   | 78   | 62   | 70   | 68   | 76   |
| Neurosurgery                  | 6    | 4    | 8    | 7    | 13   | 27   | 25   | 21   | 10   | 8    |
| Obstetrics and Gynecology     | 15   | 17   | 8    | 13   | 23   | 13   | 16   | 12   | 9    | 11   |
| Ophthalmology                 | 4    | 7    | 5    | 5    | 5    | 5    | 6    | 10   | 12   | 8    |
| Orthopedics                   | 0    | 0    | 1    | 2    | 1    | 1    | 0    | 0    | 1    | 1    |
| Otolaryngology                | 4    | 4    | 3    | 4    | 3    | 3    | 4    | 5    | 4    | 4    |
| Pathology                     | 54   | 54   | 46   | 33   | 29   | 32   | 32   | 35   | 38   | 37   |
| Pediatrics                    | 130  | 128  | 116  | 120  | 124  | 103  | 109  | 110  | 111  | 110  |
| Physical Medicine & Rehab     | 4    | 3    | 7    | 7    | 8    | 5    | 5    | 6    | 3    | 3    |
| Plastic Surgery               | 0    | 0    | 0    | 0    | 0    | 0    | 0    | 1    | 1    | 1    |
| Psychiatry                    | 53   | 87   | 79   | 85   | 104  | 83   | 75   | 88   | 92   | 79   |
| Radiation-Diagnostic/Oncology | 14   | 18   | 22   | 26   | 34   | 29   | 40   | 54   | 56   | 49   |

|         |    |    |    |    |    |    |    |    |    |    |
|---------|----|----|----|----|----|----|----|----|----|----|
| Surgery | 51 | 53 | 57 | 47 | 51 | 47 | 52 | 63 | 57 | 58 |
| Urology | 14 | 15 | 17 | 20 | 17 | 16 | 19 | 13 | 15 | 14 |

Supplementary Table 11: Number of NIH P30 grants awarded from 2011-2020, by specialty

|                               | 2011 | 2012 | 2013 | 2014 | 2015 | 2016 | 2017 | 2018 | 2019 | 2020 |
|-------------------------------|------|------|------|------|------|------|------|------|------|------|
| Anesthesiology                | 0    | 0    | 0    | 1    | 0    | 0    | 0    | 0    | 0    | 0    |
| Dermatology                   | 11   | 8    | 8    | 11   | 8    | 12   | 11   | 5    | 4    | 4    |
| Emergency Medicine            | 0    | 0    | 0    | 0    | 0    | 0    | 0    | 0    | 0    | 0    |
| Family Medicine               | 0    | 4    | 4    | 4    | 4    | 4    | 1    | 1    | 4    | 4    |
| Internal Medicine/Medicine    | 248  | 217  | 206  | 248  | 312  | 353  | 283  | 558  | 333  | 364  |
| Neurology                     | 15   | 19   | 16   | 14   | 14   | 16   | 16   | 18   | 21   | 32   |
| Neurosurgery                  | 3    | 3    | 3    | 2    | 2    | 1    | 1    | 1    | 2    | 0    |
| Obstetrics and Gynecology     | 3    | 3    | 2    | 3    | 5    | 6    | 0    | 3    | 6    | 10   |
| Ophthalmology                 | 31   | 37   | 30   | 29   | 32   | 29   | 29   | 31   | 29   | 26   |
| Orthopedics                   | 4    | 4    | 4    | 5    | 5    | 5    | 5    | 5    | 6    | 6    |
| Otolaryngology                | 15   | 8    | 7    | 8    | 6    | 5    | 1    | 61   | 1    | 6    |
| Pathology                     | 17   | 18   | 20   | 23   | 26   | 27   | 27   | 20   | 13   | 15   |
| Pediatrics                    | 17   | 21   | 23   | 18   | 18   | 20   | 18   | 12   | 14   | 25   |
| Physical Medicine & Rehab     | 0    | 0    | 0    | 0    | 0    | 0    | 0    | 0    | 0    | 0    |
| Plastic Surgery               | 0    | 0    | 0    | 0    | 0    | 0    | 0    | 0    | 0    | 0    |
| Psychiatry                    | 13   | 15   | 17   | 15   | 20   | 13   | 11   | 9    | 11   | 9    |
| Radiation-Diagnostic/Oncology | 5    | 6    | 5    | 7    | 8    | 7    | 10   | 10   | 12   | 11   |
| Surgery                       | 13   | 11   | 15   | 12   | 24   | 27   | 20   | 127  | 22   | 29   |
| Urology                       | 7    | 6    | 5    | 6    | 6    | 9    | 0    | 0    | 0    | 0    |

Supplementary Table 12: Number of active physicians per R01 grant, by specialty, 2011-2020

| Specialty                             | 2011        | 2012        | 2013        | 2014        | 2015        | 2016        | 2017        | 2018        | 2019        | 2020        |
|---------------------------------------|-------------|-------------|-------------|-------------|-------------|-------------|-------------|-------------|-------------|-------------|
| Anesthesiology                        | 201.6<br>2  | 188.9<br>7  | 190.4<br>6  | 180.8<br>6  | 195.0<br>5  | 196.9<br>5  | 192.4<br>5  | 168.0<br>6  | 169.0<br>7  | 160.1<br>0  |
| Dermatology                           | 94.09       | 89.45       | 90.18       | 99.44       | 100.9<br>1  | 107.0<br>1  | 113.6<br>9  | 101.5<br>2  | 100.9<br>4  | 113.7<br>8  |
| Emergency<br>Medicine                 | 1307.<br>08 | 1187.<br>08 | 1241.<br>37 | 1163.<br>94 | 1014.<br>85 | 1077.<br>99 | 1008.<br>29 | 893.3<br>7  | 837.0<br>7  | 610.8<br>4  |
| Family<br>Medicine                    | 1383.<br>75 | 1267.<br>45 | 1433.<br>12 | 1619.<br>21 | 1445.<br>39 | 1583.<br>16 | 1621.<br>63 | 1544.<br>75 | 1328.<br>07 | 1193.<br>92 |
| Internal<br>Medicine/Medi<br>cine     | 33.55       | 35.34       | 38.07       | 39.76       | 40.69       | 39.55       | 38.19       | 37.02       | 36.23       | 34.78       |
| Neurology                             | 24.84       | 23.66       | 24.45       | 25.43       | 25.36       | 25.10       | 24.36       | 21.80       | 21.30       | 20.09       |
| Neurosurgery                          | 36.57       | 36.23       | 36.94       | 40.14       | 33.20       | 32.76       | 31.61       | 29.68       | 28.18       | 25.78       |
| Obstetrics and<br>Gynecology          | 278.4<br>6  | 305.2<br>7  | 293.7<br>1  | 314.1<br>5  | 314.2<br>5  | 269.9<br>3  | 235.3<br>4  | 246.7<br>1  | 206.3<br>8  | 184.9<br>4  |
| Ophthalmology                         | 52.77       | 50.08       | 52.19       | 49.74       | 51.94       | 53.60       | 49.52       | 46.73       | 44.29       | 41.26       |
| Orthopedics                           | 178.5<br>8  | 164.6<br>9  | 144.5<br>8  | 155.3<br>2  | 158.2<br>2  | 145.6<br>0  | 137.6<br>9  | 135.0<br>0  | 125.4<br>5  | 107.1<br>3  |
| Otolaryngology                        | 65.01       | 62.26       | 58.62       | 59.65       | 57.38       | 60.31       | 62.67       | 54.22       | 49.88       | 52.01       |
| Pathology                             | 16.14       | 16.28       | 16.11       | 17.46       | 17.44       | 17.44       | 18.08       | 16.46       | 15.38       | 14.70       |
| Pediatrics                            | 72.18       | 69.60       | 72.41       | 74.48       | 80.48       | 81.10       | 86.06       | 82.68       | 82.59       | 76.63       |
| Physical<br>Medicine &<br>Rehab       | 274.2<br>9  | 248.7<br>0  | 269.8<br>8  | 244.1<br>9  | 269.5<br>3  | 220.3<br>2  | 186.8<br>6  | 159.2<br>5  | 160.1<br>1  | 162.7<br>8  |
| Plastic Surgery                       | 2274.<br>00 | Inf         | 6942.<br>00 | 6981.<br>00 | Inf         | Inf         | 7142.<br>00 | Inf         | 7317.<br>00 | Inf         |
| Psychiatry                            | 37.91       | 38.17       | 41.26       | 41.87       | 45.91       | 44.88       | 44.22       | 42.82       | 42.96       | 41.62       |
| Radiation-<br>Diagnostic/Onc<br>ology | 61.33       | 68.02       | 71.77       | 77.15       | 76.80       | 78.64       | 75.75       | 66.84       | 68.37       | 66.72       |

|         |        |        |        |        |        |        |        |        |        |        |
|---------|--------|--------|--------|--------|--------|--------|--------|--------|--------|--------|
| Surgery | 63.71  | 66.03  | 68.26  | 70.25  | 70.15  | 71.85  | 65.21  | 61.42  | 56.94  | 52.28  |
| Urology | 125.97 | 127.25 | 117.72 | 128.81 | 155.68 | 164.41 | 162.64 | 167.68 | 167.23 | 152.25 |

Supplementary Table 13: Number of active physicians per R03 grant, by specialty, 2011-2020

| Specialty                  | 2011     | 2012     | 2013     | 2014     | 2015     | 2016     | 2017     | 2018     | 2019     | 2020     |
|----------------------------|----------|----------|----------|----------|----------|----------|----------|----------|----------|----------|
| Anesthesiology             | 6687.17  | 4493.39  | 6793.00  | 6842.42  | 10337.75 | 10389.12 | 6960.33  | 4668.28  | 5283.38  | 8453.40  |
| Dermatology                | 2164.00  | 1848.58  | 5681.50  | 2883.63  | 1463.25  | 1319.83  | 1721.57  | 3070.88  | 3129.00  | 2503.20  |
| Emergency Medicine         | 33984.00 | 35612.50 | 37241.00 | 38410.00 | 9894.75  | 10240.88 | 8469.60  | 10943.75 | 22601.00 | 11300.50 |
| Family Medicine            | 13318.62 | 11970.33 | 12101.89 | 15729.43 | 18549.17 | 22480.90 | 56757.00 | 57928.00 | 23639.60 | 39399.33 |
| Internal Medicine/Medicine | 924.14   | 791.71   | 841.27   | 907.81   | 1037.17  | 1275.81  | 1269.86  | 1155.53  | 1001.43  | 993.15   |
| Neurology                  | 1291.60  | 1448.44  | 1196.00  | 1106.17  | 1030.15  | 847.16   | 914.47   | 928.77   | 943.07   | 1088.15  |
| Neurosurgery               | 1682.33  | 638.63   | 646.38   | 1051.70  | 763.71   | 1359.63  | 2765.50  | 2819.75  | 2874.00  | 958.00   |
| Obstetrics and Gynecology  | 5047.13  | 3383.46  | 4082.60  | 3429.46  | 4148.10  | 3778.96  | 2777.07  | 2481.65  | 3051.43  | 4272.00  |
| Ophthalmology              | Inf      | Inf      | Inf      | 9227.50  | 6197.67  | 18705.00 | 18817.00 | 9532.25  | 6437.33  | 6437.33  |
| Orthopedics                | 1982.20  | 1959.80  | 1614.50  | 1375.68  | 1914.50  | 2724.71  | 6333.67  | 6345.00  | 2724.14  | 2724.14  |
| Otolaryngology             | 710.15   | 515.33   | 490.53   | 624.37   | 672.21   | 789.04   | 793.83   | 965.15   | 4888.50  | 3259.00  |
| Pathology                  | 599.00   | 623.59   | 652.86   | 674.90   | 885.73   | 1451.39  | 1069.92  | 606.71   | 486.27   | 505.72   |

|                                       |             |             |             |             |             |             |             |               |             |             |
|---------------------------------------|-------------|-------------|-------------|-------------|-------------|-------------|-------------|---------------|-------------|-------------|
| Pediatrics                            | 1460.<br>76 | 1927.<br>09 | 1607.<br>49 | 1673.<br>60 | 1692.<br>44 | 1348.<br>58 | 1669.<br>57 | 1451.<br>87   | 1595.<br>21 | 1731.<br>94 |
| Physical<br>Medicine &<br>Rehab       | 1214.<br>71 | 1243.<br>50 | 1781.<br>20 | 1290.<br>71 | 1832.<br>80 | 1850.<br>70 | 3114.<br>33 | 2388.<br>75   | 1395.<br>29 | 1220.<br>88 |
| Plastic<br>Surgery                    | Inf         | Inf         | Inf         | Inf         | Inf         | 7081.<br>00 | 7142.<br>00 | Inf           | Inf         | Inf         |
| Psychiatry                            | 1531.<br>56 | 1349.<br>73 | 1243.<br>20 | 1705.<br>27 | 1886.<br>80 | 1650.<br>89 | 1317.<br>41 | 1673.<br>85   | 1939.<br>60 | 2424.<br>50 |
| Radiation-<br>Diagnostic/O<br>ncology | 4055.<br>63 | 5013.<br>93 | 3775.<br>00 | 2246.<br>53 | 1839.<br>62 | 4359.<br>89 | 3622.<br>36 | 2253.<br>97   | 1877.<br>14 | 1877.<br>14 |
| Surgery                               | 1754.<br>27 | 1287.<br>53 | 1481.<br>59 | 1483.<br>56 | 1329.<br>16 | 1796.<br>29 | 1001.<br>68 | 1204.<br>91   | 2324.<br>00 | 1704.<br>27 |
| Urology                               | 9826.<br>00 | 3266.<br>17 | 4885.<br>50 | 2447.<br>38 | 1961.<br>60 | 3288.<br>17 | 9921.<br>00 | 10061.<br>.00 | 3400.<br>33 | 2550.<br>25 |

Supplementary Table 14: Number of active physicians per R21 grant, by specialty, 2011-2020

| Specialty                         | 2011        | 2012        | 2013         | 2014        | 2015        | 2016        | 2017        | 2018        | 2019        | 2020        |
|-----------------------------------|-------------|-------------|--------------|-------------|-------------|-------------|-------------|-------------|-------------|-------------|
| Anesthesiology                    | 1486.<br>04 | 1685.<br>02 | 1509.5<br>6  | 1954.<br>98 | 1476.<br>82 | 1539.<br>13 | 1606.<br>23 | 1135.<br>53 | 1083.<br>77 | 1280.<br>82 |
| Dermatology                       | 569.4<br>7  | 616.1<br>9  | 631.28       | 443.6<br>3  | 557.4<br>3  | 848.4<br>6  | 803.4<br>0  | 767.7<br>2  | 834.4<br>0  | 625.8<br>0  |
| Emergency<br>Medicine             | 5664.<br>00 | 7122.<br>50 | 12413.<br>67 | 7682.<br>00 | 6596.<br>50 | 8192.<br>70 | 6049.<br>71 | 4377.<br>50 | 7533.<br>67 | 9040.<br>40 |
| Family<br>Medicine                | 7610.<br>64 | 6733.<br>31 | 5732.4<br>7  | 5505.<br>30 | 4637.<br>29 | 4887.<br>15 | 8108.<br>14 | 9654.<br>67 | 7387.<br>38 | 7387.<br>38 |
| Internal<br>Medicine/Medi<br>cine | 290.7<br>9  | 270.3<br>9  | 282.56       | 305.8<br>9  | 301.0<br>3  | 291.4<br>3  | 308.1<br>5  | 313.4<br>7  | 318.7<br>6  | 312.1<br>3  |
| Neurology                         | 201.8<br>1  | 167.1<br>3  | 180.22       | 181.8<br>4  | 186.0<br>0  | 171.5<br>8  | 167.2<br>8  | 149.8<br>0  | 132.2<br>1  | 202.0<br>9  |

|                               |             |             |             |             |             |             |             |             |             |             |
|-------------------------------|-------------|-------------|-------------|-------------|-------------|-------------|-------------|-------------|-------------|-------------|
| Neurosurgery                  | 388.2<br>3  | 283.8<br>3  | 235.05      | 250.4<br>0  | 152.7<br>4  | 151.0<br>7  | 204.8<br>5  | 216.9<br>0  | 140.2<br>0  | 174.1<br>8  |
| Obstetrics and Gynecology     | 1223.<br>55 | 1450.<br>05 | 1512.0<br>7 | 1646.<br>14 | 1728.<br>38 | 1732.<br>02 | 1983.<br>62 | 1506.<br>71 | 1294.<br>55 | 993.4<br>9  |
| Ophthalmology                 | 854.4<br>3  | 954.2<br>1  | 610.57      | 636.3<br>8  | 516.4<br>7  | 550.1<br>5  | 784.0<br>4  | 614.9<br>8  | 378.6<br>7  | 371.3<br>8  |
| Orthopedics                   | 1415.<br>86 | 979.9<br>0  | 1019.6<br>8 | 1283.<br>97 | 1196.<br>56 | 1192.<br>06 | 730.8<br>1  | 528.7<br>5  | 733.4<br>2  | 706.2<br>6  |
| Otolaryngology                | 659.4<br>3  | 579.7<br>5  | 443.81      | 334.4<br>8  | 409.1<br>7  | 676.3<br>2  | 635.0<br>7  | 311.3<br>4  | 325.9<br>0  | 296.2<br>7  |
| Pathology                     | 120.7<br>7  | 137.9<br>1  | 122.41      | 96.41       | 83.04       | 78.69       | 93.04       | 108.9<br>0  | 111.8<br>9  | 117.0<br>6  |
| Pediatrics                    | 533.7<br>4  | 588.2<br>7  | 551.59      | 526.8<br>8  | 475.5<br>6  | 471.4<br>6  | 503.7<br>5  | 504.4<br>6  | 477.3<br>1  | 459.2<br>3  |
| Physical Medicine & Rehab     | 2125.<br>75 | 1243.<br>50 | 809.64      | 1003.<br>89 | 2291.<br>00 | 1028.<br>17 | 718.6<br>9  | 955.5<br>0  | 751.3<br>1  | 1085.<br>22 |
| Plastic Surgery               | Inf         |
| Psychiatry                    | 313.8<br>4  | 227.6<br>7  | 195.27      | 209.5<br>9  | 241.9<br>0  | 251.4<br>6  | 249.7<br>1  | 258.3<br>8  | 250.2<br>7  | 245.5<br>2  |
| Radiation-Diagnostic/Oncology | 334.4<br>8  | 347.5<br>0  | 370.10      | 332.1<br>0  | 319.2<br>7  | 332.5<br>3  | 346.4<br>9  | 455.8<br>6  | 400.9<br>4  | 408.8<br>8  |
| Surgery                       | 453.6<br>9  | 476.8<br>6  | 547.54      | 525.4<br>3  | 407.3<br>2  | 369.8<br>2  | 500.8<br>4  | 516.3<br>9  | 501.2<br>5  | 473.4<br>1  |
| Urology                       | 1228.<br>25 | 1088.<br>72 | 1954.2<br>0 | 2447.<br>38 | 980.8<br>0  | 758.8<br>1  | 1102.<br>33 | 1437.<br>29 | 1275.<br>13 | 1020.<br>10 |

Supplementary Table 15: Number of active physicians per F32 grant, by specialty, 2011-2020

| Specialty      | 2011         | 2012        | 2013        | 2014        | 2015         | 2016         | 2017         | 2018        | 2019         | 2020        |
|----------------|--------------|-------------|-------------|-------------|--------------|--------------|--------------|-------------|--------------|-------------|
| Anesthesiology | 1003<br>0.75 | 6740.<br>08 | 5094.<br>75 | 5864.9<br>3 | 41351.<br>00 | 4155<br>6.50 | 1392<br>0.67 | 8402.<br>90 | 2113<br>3.50 | 7044.<br>50 |

|                            |          |          |          |           |           |          |          |         |          |          |
|----------------------------|----------|----------|----------|-----------|-----------|----------|----------|---------|----------|----------|
| Dermatology                | 2705.00  | 2772.88  | 3787.67  | 5767.25   | 3902.00   | 3959.50  | 2410.20  | 3070.88 | 12516.00 | 4172.00  |
| Emergency Medicine         | 33984.00 | 35612.50 | 37241.00 | Inf       | Inf       | Inf      | Inf      | Inf     | Inf      | 45202.00 |
| Family Medicine            | Inf      | Inf      | Inf      | 110106.00 | 111295.00 | Inf      | Inf      | Inf     | Inf      | Inf      |
| Internal Medicine/Medicine | 865.46   | 982.57   | 957.30   | 1042.30   | 1046.69   | 964.90   | 875.43   | 1024.90 | 1112.69  | 1035.96  |
| Neurology                  | 861.07   | 1303.60  | 657.80   | 428.19    | 461.79    | 589.33   | 473.00   | 515.98  | 487.79   | 643.00   |
| Neurosurgery               | 630.88   | 638.63   | 646.38   | 657.31    | 534.60    | 543.85   | 614.56   | 375.97  | 718.50   | 479.00   |
| Obstetrics and Gynecology  | 10094.25 | 6766.92  | 10206.50 | 10288.38  | 8296.20   | 10392.12 | 13885.33 | 7031.33 | 8544.00  | 8544.00  |
| Ophthalmology              | 4485.75  | 2590.00  | 2616.71  | 2050.56   | 1549.42   | 2338.13  | 1881.70  | 2723.50 | 2145.78  | 1931.20  |
| Orthopedics                | 3964.40  | 3266.33  | 3874.80  | 3851.90   | 3190.83   | 3178.83  | 3166.83  | 2719.29 | 2724.14  | 2724.14  |
| Otolaryngology             | 923.20   | 1325.14  | 1331.43  | 936.55    | 1568.50   | 1183.56  | 680.43   | 965.15  | 1222.13  | 1629.50  |
| Pathology                  | 680.68   | 843.68   | 623.18   | 613.55    | 577.65    | 522.50   | 534.96   | 749.47  | 790.19   | 972.54   |
| Pediatrics                 | 2220.36  | 2069.83  | 2344.25  | 2370.94   | 3196.83   | 3411.12  | 3895.67  | 4578.96 | 3190.42  | 5051.50  |
| Physical Medicine & Rehab  | 8503.00  | 8704.50  | Inf      | 9035.00   | 9164.00   | 9253.50  | 3114.33  | 2388.75 | 3255.67  | 4883.50  |
| Plastic Surgery            | Inf      | Inf      | Inf      | Inf       | Inf       | Inf      | Inf      | Inf     | 7317.00  | Inf      |
| Psychiatry                 | 981.77   | 1303.19  | 1332.00  | 1442.92   | 1397.63   | 1309.33  | 1317.41  | 1539.94 | 1337.66  | 1212.25  |



|                               |         |         |         |          |          |         |         |          |          |          |
|-------------------------------|---------|---------|---------|----------|----------|---------|---------|----------|----------|----------|
| Radiation-Diagnostic/Oncology | 2317.50 | 4387.19 | 7550.00 | 38191.00 | 19316.00 | 4359.89 | 4980.75 | 5795.93  | 10324.25 | 5899.57  |
| Surgery                       | 1547.88 | 1716.70 | 1937.46 | 1327.40  | 1202.57  | 1257.40 | 1473.06 | 1265.15  | 1704.27  | 1704.27  |
| Urology                       | 4913.00 | 4899.25 | 4885.50 | 1957.90  | 4904.00  | 3288.17 | 3307.00 | 10061.00 | 10201.00 | 10201.00 |

Supplementary Table 16: Number of active physicians per T32 grant, by specialty, 2011-2020

| Specialty                  | 2011     | 2012     | 2013     | 2014     | 2015     | 2016     | 2017     | 2018     | 2019     | 2020     |
|----------------------------|----------|----------|----------|----------|----------|----------|----------|----------|----------|----------|
| Anesthesiology             | 3086.39  | 2696.03  | 2911.29  | 2414.97  | 1969.10  | 2187.18  | 1670.48  | 2211.29  | 2113.35  | 2817.80  |
| Dermatology                | 901.67   | 924.29   | 946.92   | 1048.59  | 1064.18  | 1079.86  | 1095.55  | 1228.35  | 1788.00  | 1564.50  |
| Emergency Medicine         | Inf      | Inf      | Inf      | Inf      | Inf      | 40963.50 | 21174.00 | 21887.50 | 22601.00 | 22601.00 |
| Family Medicine            | 21309.80 | 26933.25 | 18152.83 | 22021.20 | 27823.75 | 28101.12 | 12612.67 | 23171.20 | 29549.50 | 23639.60 |
| Internal Medicine/Medicine | 285.47   | 282.90   | 311.06   | 318.89   | 336.55   | 336.72   | 255.66   | 322.03   | 346.31   | 329.24   |
| Neurology                  | 349.08   | 383.41   | 411.13   | 414.81   | 461.79   | 451.82   | 360.97   | 386.99   | 404.17   | 382.32   |
| Neurosurgery               | 1682.33  | 1703.00  | 1723.67  | 1752.83  | 1069.20  | 1087.70  | 921.83   | 1409.88  | 958.00   | 718.50   |
| Obstetrics and Gynecology  | 3364.75  | 3691.05  | 3402.17  | 3741.23  | 3456.75  | 4156.85  | 3204.31  | 6026.86  | 5340.00  | 3883.64  |
| Ophthalmology              | 1196.20  | 1133.13  | 872.24   | 971.32   | 1093.71  | 1039.17  | 696.93   | 866.57   | 742.77   | 839.65   |
| Orthopedics                | 2477.75  | 2177.56  | 2421.75  | 2751.36  | 2735.00  | 2724.71  | 2375.13  | 2719.29  | 2724.14  | 2383.63  |

|                               |             |             |             |             |             |             |             |             |             |             |
|-------------------------------|-------------|-------------|-------------|-------------|-------------|-------------|-------------|-------------|-------------|-------------|
| Otolaryngology                | 769.3<br>3  | 773.0<br>0  | 847.2<br>7  | 668.9<br>6  | 627.4<br>0  | 631.2<br>3  | 328.4<br>8  | 567.7<br>4  | 611.0<br>6  | 611.0<br>6  |
| Pathology                     | 174.1<br>3  | 191.2<br>3  | 195.8<br>6  | 170.8<br>6  | 195.3<br>8  | 186.6<br>1  | 144.2<br>6  | 190.1<br>6  | 214.2<br>9  | 229.8<br>7  |
| Pediatrics                    | 513.9<br>7  | 564.5<br>0  | 625.1<br>3  | 654.0<br>5  | 639.3<br>7  | 690.3<br>5  | 664.0<br>3  | 815.4<br>3  | 819.1<br>6  | 841.9<br>2  |
| Physical Medicine & Rehab     | 944.7<br>8  | 2176.<br>13 | 2226.<br>50 | 3011.<br>67 | 3054.<br>67 | 2313.<br>38 | 1868.<br>60 | 1911.<br>00 | 2441.<br>75 | 1953.<br>40 |
| Plastic Surgery               | Inf         |
| Psychiatry                    | 497.2<br>6  | 478.3<br>9  | 466.2<br>0  | 474.8<br>9  | 531.4<br>9  | 534.8<br>0  | 357.0<br>6  | 557.9<br>5  | 570.4<br>7  | 546.3<br>7  |
| Radiation-Diagnostic/Oncology | 1474.<br>77 | 1754.<br>88 | 1715.<br>91 | 1468.<br>89 | 1379.<br>71 | 1453.<br>30 | 1207.<br>46 | 1267.<br>86 | 1376.<br>57 | 1588.<br>35 |
| Surgery                       | 487.3<br>0  | 459.8<br>3  | 466.4<br>3  | 525.4<br>3  | 526.1<br>3  | 513.2<br>2  | 439.3<br>3  | 477.4<br>2  | 440.7<br>6  | 464.8<br>0  |
| Urology                       | 1403.<br>71 | 1224.<br>81 | 1395.<br>86 | 1223.<br>69 | 1961.<br>60 | 1644.<br>08 | 2480.<br>25 | 5030.<br>50 | 2550.<br>25 | 2550.<br>25 |

Supplementary Table 17: Number of active physicians per K01 grant, by specialty, 2011-2020

| Specialty          | 2011         | 2012         | 2013         | 2014         | 2015         | 2016         | 2017         | 2018         | 2019         | 2020         |
|--------------------|--------------|--------------|--------------|--------------|--------------|--------------|--------------|--------------|--------------|--------------|
| Anesthesiology     | 10030<br>.75 | 10110<br>.12 | 10189<br>.50 | 8210.<br>90  | 8270.<br>20  | 8311.<br>30  | 6960.<br>33  | 5251.<br>81  | 8453.<br>40  | 6038.<br>14  |
| Dermatology        | 2705.<br>00  | 2772.<br>88  | 1893.<br>83  | 2883.<br>63  | 1951.<br>00  | 1696.<br>93  | 1095.<br>55  | 944.8<br>8   | 1251.<br>60  | 1564.<br>50  |
| Emergency Medicine | Inf          | 35612<br>.50 | 37241<br>.00 | 38410<br>.00 | 19789<br>.50 | Inf          | Inf          | 43775<br>.00 | 45202<br>.00 | 22601<br>.00 |
| Family Medicine    | 9686.<br>27  | 8287.<br>15  | 10891<br>.70 | 15729<br>.43 | 15899<br>.29 | 14050<br>.56 | 14189<br>.25 | 12872<br>.89 | 13133<br>.11 | 7879.<br>87  |

|                                       |              |              |              |              |             |             |              |             |             |              |
|---------------------------------------|--------------|--------------|--------------|--------------|-------------|-------------|--------------|-------------|-------------|--------------|
| Internal<br>Medicine/Me<br>dicine     | 838.8<br>3   | 880.3<br>8   | 881.3<br>3   | 781.7<br>2   | 717.5<br>4  | 802.9<br>6  | 855.9<br>8   | 765.3<br>5  | 706.8<br>9  | 682.7<br>9   |
| Neurology                             | 1076.<br>33  | 1002.<br>77  | 822.2<br>5   | 780.8<br>2   | 787.7<br>6  | 713.3<br>9  | 685.8<br>5   | 733.2<br>4  | 615.0<br>4  | 744.5<br>3   |
| Neurosurgery                          | 1682.<br>33  | 1703.<br>00  | 5171.<br>00  | Inf          | Inf         | 5438.<br>50 | Inf          | 2819.<br>75 | 1916.<br>00 | 1916.<br>00  |
| Obstetrics<br>and<br>Gynecology       | 20188<br>.50 | 40601<br>.50 | 20413<br>.00 | 10288<br>.38 | 8296.<br>20 | 8313.<br>70 | 5950.<br>86  | 7031.<br>33 | 5340.<br>00 | 5340.<br>00  |
| Ophthalmolo<br>gy                     | Inf          | Inf          | Inf          | 18455<br>.00 | Inf         | Inf         | 18817<br>.00 | 9532.<br>25 | 9656.<br>00 | 19312<br>.00 |
| Orthopedics                           | 3964.<br>40  | 4899.<br>50  | 2767.<br>71  | 2751.<br>36  | 1914.<br>50 | 2724.<br>71 | 3166.<br>83  | 3807.<br>00 | 3178.<br>17 | 3813.<br>80  |
| Otolaryngolo<br>gy                    | 4616.<br>00  | 4638.<br>00  | 4660.<br>00  | 4682.<br>75  | Inf         | Inf         | Inf          | Inf         | Inf         | 9777.<br>00  |
| Pathology                             | 1151.<br>92  | 1024.<br>46  | 914.0<br>0   | 964.1<br>4   | 1022.<br>00 | 1088.<br>54 | 987.6<br>2   | 796.3<br>1  | 743.7<br>1  | 602.0<br>5   |
| Pediatrics                            | 2775.<br>45  | 3492.<br>84  | 3125.<br>67  | 2994.<br>87  | 3596.<br>44 | 2319.<br>56 | 2540.<br>65  | 2834.<br>60 | 2635.<br>57 | 2245.<br>11  |
| Physical<br>Medicine &<br>Rehab       | 2834.<br>33  | 2176.<br>13  | 2226.<br>50  | 1505.<br>83  | 1309.<br>14 | 1156.<br>69 | 718.6<br>9   | 735.0<br>0  | 976.7<br>0  | 813.9<br>2   |
| Plastic<br>Surgery                    | Inf          | Inf          | Inf          | Inf          | Inf         | Inf         | Inf          | Inf         | Inf         | Inf          |
| Psychiatry                            | 472.7<br>0   | 449.9<br>1   | 490.7<br>4   | 500.2<br>1   | 524.1<br>1  | 566.7<br>2  | 545.7<br>9   | 592.2<br>8  | 538.7<br>8  | 478.9<br>1   |
| Radiation-<br>Diagnostic/O<br>ncology | 1908.<br>53  | 2339.<br>83  | 2903.<br>85  | 3471.<br>91  | 2759.<br>43 | 2802.<br>79 | 2097.<br>16  | 2253.<br>97 | 2753.<br>13 | 3754.<br>27  |
| Surgery                               | 3289.<br>25  | 3678.<br>64  | 2289.<br>73  | 3602.<br>93  | 2525.<br>40 | 2095.<br>67 | 1926.<br>31  | 2811.<br>44 | 3195.<br>50 | 3652.<br>00  |
| Urology                               | 9826.<br>00  | 9798.<br>50  | 9771.<br>00  | 9789.<br>50  | 3269.<br>33 | 2466.<br>13 | 1653.<br>50  | 2012.<br>20 | 2040.<br>20 | 1700.<br>17  |

Supplementary Table 18: Number of active physicians per K08 grant, by specialty, 2011-2020

| Specialty                  | 2011    | 2012    | 2013    | 2014    | 2015     | 2016     | 2017     | 2018     | 2019    | 2020    |
|----------------------------|---------|---------|---------|---------|----------|----------|----------|----------|---------|---------|
| Anesthesiology             | 3343.6  | 2888.6  | 2717.2  | 2737.0  | 3445.9   | 2770.4   | 2784.1   | 1826.7   | 1690.7  | 2113.4  |
| Dermatology                | 636.5   | 504.2   | 757.5   | 769.0   | 731.6    | 913.7    | 927.0    | 944.9    | 1043.0  | 1251.6  |
| Emergency Medicine         | 11328.0 | 8903.1  | 6206.8  | 9602.5  | 7915.8   | 5851.9   | 4705.3   | 5471.9   | 7533.7  | 7533.7  |
| Family Medicine            | 21309.8 | 21546.6 | 21783.4 | 55053.0 | 111295.0 | 112404.5 | 113514.0 | 115856.0 | 39399.3 | 39399.3 |
| Internal Medicine/Medicine | 405.4   | 409.1   | 460.8   | 467.1   | 496.0    | 470.6    | 489.6    | 481.1    | 437.0   | 451.8   |
| Neurology                  | 339.9   | 352.3   | 337.3   | 414.8   | 352.4    | 410.7    | 415.7    | 464.4    | 392.9   | 392.9   |
| Neurosurgery               | 721.0   | 729.9   | 646.4   | 657.3   | 486.0    | 418.3    | 395.1    | 512.7    | 479.0   | 574.8   |
| Obstetrics and Gynecology  | 5768.1  | 4511.3  | 5832.3  | 8230.7  | 20740.5  | 13856.2  | 20828.0  | 7031.3   | 6102.9  | 6102.9  |
| Ophthalmology              | 717.7   | 755.4   | 654.2   | 595.3   | 563.4    | 692.8    | 752      | 706.1    | 839.7   | 804.7   |
| Orthopedics                | 19822.0 | 6532.7  | 4843.5  | 4814.9  | 4786.3   | 4768.3   | 2714.4   | 2379.4   | 2724.1  | 3178.2  |
| Otolaryngology             | 769.3   | 713.5   | 716.9   | 851.4   | 723.9    | 860.8    | 1058.4   | 877.4    | 1086.3  | 977.7   |
| Pathology                  | 427.9   | 409.8   | 415.5   | 374.9   | 402.6    | 567.9    | 513.6    | 439.3    | 451.5   | 505.7   |
| Pediatrics                 | 509.3   | 564.5   | 592.2   | 677.4   | 710.4    | 630.3    | 512.6    | 517.6    | 531.7   | 606.2   |
| Physical Medicine & Rehab  | Inf     | 4352.3  | Inf     | Inf     | Inf      | Inf      | Inf      | 9555.0   | 9767.0  | 9767.0  |

|                               |        |        |        |        |         |         |         |         |        |        |
|-------------------------------|--------|--------|--------|--------|---------|---------|---------|---------|--------|--------|
| Plastic Surgery               | Inf    | Inf    | Inf    | Inf    | Inf     | Inf     | Inf     | Inf     | Inf    | Inf    |
| Psychiatry                    | 1160.3 | 1219.1 | 1962.9 | 1500.6 | 1509.4  | 1725.9  | 1661.1  | 1673.8  | 1939.6 | 1616.3 |
| Radiation-Diagnostic/Oncology | 6489.0 | 7019.5 | 7550.0 | 5455.9 | 12877.3 | 19619.5 | 13282.0 | 10142.9 | 2949.8 | 2429.2 |
| Surgery                       | 453.7  | 444.0  | 493.9  | 586.5  | 682.5   | 613.4   | 626.1   | 588.4   | 568.1  | 568.1  |
| Urology                       | 1091.8 | 1224.8 | 888.3  | 1631.6 | 2452.0  | 1972.9  | 1984.2  | 2515.3  | 1700.2 | 2040.2 |

Supplementary Table 19: Number of active physicians per K23 grant, by specialty, 2011-2020

| Specialty                  | 2011     | 2012     | 2013     | 2014     | 2015     | 2016     | 2017     | 2018     | 2019     | 2020     |
|----------------------------|----------|----------|----------|----------|----------|----------|----------|----------|----------|----------|
| Anesthesiology             | 4458.11  | 4044.05  | 3135.23  | 3158.04  | 3445.92  | 4155.65  | 3212.46  | 3501.21  | 2486.29  | 2486.29  |
| Dermatology                | 3606.67  | 2772.88  | 3787.67  | 11534.50 | 3902.00  | 2969.63  | 3012.75  | 1364.83  | 1251.60  | 1564.50  |
| Emergency Medicine         | 1888.00  | 2374.17  | 2482.73  | 2743.57  | 2638.60  | 2155.97  | 2016.57  | 2303.95  | 2260.10  | 3013.47  |
| Family Medicine            | 11838.78 | 13466.62 | 18152.83 | 36702.00 | 18549.17 | 28101.12 | 22702.80 | 23171.20 | 19699.67 | 16885.43 |
| Internal Medicine/Medicine | 356.37   | 349.36   | 362.90   | 379.02   | 413.37   | 438.26   | 467.84   | 477.18   | 482.61   | 420.18   |
| Neurology                  | 211.74   | 220.95   | 274.08   | 265.48   | 257.54   | 315.22   | 285.77   | 262.86   | 243.90   | 248.18   |
| Neurosurgery               | 2523.50  | 1277.25  | 1034.20  | 1314.63  | 1069.20  | 1087.70  | 1382.75  | 1409.88  | 1149.60  | 958.00   |
| Obstetrics and Gynecology  | 3364.75  | 2900.11  | 3711.46  | 2939.54  | 4148.10  | 8313.70  | 5950.86  | 5273.50  | 4272.00  | 3560.00  |

|                               |         |         |         |         |         |          |          |          |          |          |
|-------------------------------|---------|---------|---------|---------|---------|----------|----------|----------|----------|----------|
| Ophthalmology                 | 1196.20 | 1648.18 | 1409.00 | 1677.73 | 1430.23 | 935.25   | 896.05   | 907.83   | 919.62   | 965.60   |
| Orthopedics                   | 9911.00 | 6532.67 | 6458.00 | 6419.83 | 9572.50 | 9536.50  | 19001.00 | 6345.00  | 6356.33  | 4767.25  |
| Otolaryngology                | 1154.00 | 1546.00 | 1553.33 | 1040.61 | 784.25  | 860.77   | 793.83   | 804.29   | 814.75   | 814.75   |
| Pathology                     | 3743.75 | 4780.83 | 6855.00 | 4499.33 | 6643.00 | 13062.50 | 12839.00 | 12741.00 | 12643.00 | 4214.33  |
| Pediatrics                    | 590.52  | 600.92  | 632.16  | 639.35  | 728.39  | 892.14   | 687.47   | 640.07   | 561.28   | 469.91   |
| Physical Medicine & Rehab     | 1214.71 | 1450.75 | 890.60  | 752.92  | 1018.22 | 925.35   | 1557.17  | 4777.50  | 3255.67  | 3255.67  |
| Plastic Surgery               | Inf     | Inf     | Inf     | Inf     | Inf     | Inf      | Inf      | Inf      | Inf      | Inf      |
| Psychiatry                    | 321.76  | 323.01  | 358.62  | 378.95  | 377.36  | 408.28   | 374.56   | 373.77   | 352.65   | 343.29   |
| Radiation-Diagnostic/Oncology | 5407.50 | 8774.38 | 9437.50 | 9547.75 | 9658.00 | 9809.75  | 9961.50  | 20285.75 | 41297.00 | 13765.67 |
| Surgery                       | 2024.15 | 2145.88 | 2289.73 | 2292.77 | 2525.40 | 2514.80  | 2782.44  | 3162.88  | 2840.44  | 1966.46  |
| Urology                       | 4913.00 | 9798.50 | 4885.50 | 3263.17 | 4904.00 | 3288.17  | 4960.50  | 10061.00 | 3400.33  | 3400.33  |

Supplementary Table 20: Number of active physicians per U01 grant, by specialty, 2011-2020

| Specialty      | 2011    | 2012    | 2013    | 2014    | 2015    | 2016    | 2017    | 2018    | 2019    | 2020    |
|----------------|---------|---------|---------|---------|---------|---------|---------|---------|---------|---------|
| Anesthesiology | 5731.86 | 5777.21 | 5822.57 | 3421.21 | 4594.56 | 2770.43 | 2983.00 | 2800.97 | 3522.25 | 3251.31 |
| Dermatology    | 3606.67 | 2218.30 | 1623.29 | 1922.42 | 1463.25 | 2375.70 | 2410.20 | 2047.25 | 1390.67 | 1137.82 |

|                                       |             |             |              |              |              |              |              |             |              |              |
|---------------------------------------|-------------|-------------|--------------|--------------|--------------|--------------|--------------|-------------|--------------|--------------|
| Emergency<br>Medicine                 | 3398<br>.40 | 2739<br>.42 | 2190.<br>65  | 2743.<br>57  | 4947.<br>38  | 8192.<br>70  | 10587<br>.00 | 5471<br>.88 | 15067<br>.33 | 6457.<br>43  |
| Family<br>Medicine                    | 9686<br>.27 | 7695<br>.21 | 9076.<br>42  | 10009<br>.64 | 7419.<br>67  | 7493.<br>63  | 8731.<br>85  | 7723<br>.73 | 7879.<br>87  | 11819<br>.80 |
| Internal<br>Medicine/Med<br>icine     | 282.<br>51  | 275.<br>81  | 257.0<br>5   | 295.4<br>5   | 273.5<br>9   | 277.3<br>5   | 263.2<br>3   | 240.<br>05  | 213.0<br>7   | 204.0<br>3   |
| Neurology                             | 391.<br>39  | 325.<br>90  | 328.9<br>0   | 245.8<br>1   | 239.1<br>4   | 173.7<br>8   | 221.2<br>4   | 199.<br>02  | 208.0<br>3   | 186.1<br>3   |
| Neurosurgery                          | 841.<br>17  | 1277<br>.25 | 646.3<br>8   | 751.2<br>1   | 411.2<br>3   | 201.4<br>3   | 221.2<br>4   | 268.<br>55  | 574.8<br>0   | 718.5<br>0   |
| Obstetrics and<br>Gynecology          | 2691<br>.80 | 2388<br>.32 | 5103.<br>25  | 3165.<br>65  | 1803.<br>52  | 3197.<br>58  | 2603.<br>50  | 3515<br>.67 | 4746.<br>67  | 3883.<br>64  |
| Ophthalmolog<br>y                     | 4485<br>.75 | 2590<br>.00 | 3663.<br>40  | 3691.<br>00  | 3718.<br>60  | 3741.<br>00  | 3136.<br>17  | 1906<br>.45 | 1609.<br>33  | 2414.<br>00  |
| Orthopedics                           | Inf         | Inf         | 19374<br>.00 | 9629.<br>75  | 19145<br>.00 | 19073<br>.00 | Inf          | Inf         | 19069<br>.00 | 19069<br>.00 |
| Otolaryngolog<br>y                    | 2308<br>.00 | 2319<br>.00 | 3106.<br>67  | 2341.<br>38  | 3137.<br>00  | 3156.<br>17  | 2381.<br>50  | 1930<br>.30 | 2444.<br>25  | 2444.<br>25  |
| Pathology                             | 277.<br>31  | 265.<br>60  | 298.0<br>4   | 409.0<br>3   | 458.1<br>4   | 408.2<br>0   | 401.2<br>2   | 364.<br>03  | 332.7<br>1   | 341.7<br>0   |
| Pediatrics                            | 426.<br>99  | 436.<br>61  | 485.0<br>2   | 474.1<br>9   | 464.0<br>6   | 563.0<br>0   | 536.1<br>0   | 541.<br>15  | 546.1<br>1   | 551.0<br>7   |
| Physical<br>Medicine &<br>Rehab       | 2125<br>.75 | 2901<br>.50 | 1272.<br>29  | 1290.<br>71  | 1145.<br>50  | 1850.<br>70  | 1868.<br>60  | 1592<br>.50 | 3255.<br>67  | 3255.<br>67  |
| Plastic<br>Surgery                    | Inf         | Inf         | Inf          | Inf          | Inf          | Inf          | Inf          | 7229<br>.50 | 7317.<br>00  | 7317.<br>00  |
| Psychiatry                            | 722.<br>43  | 434.<br>40  | 472.1<br>0   | 441.3<br>6   | 362.8<br>5   | 457.4<br>8   | 509.4<br>0   | 437.<br>48  | 421.6<br>5   | 491.0<br>4   |
| Radiation-<br>Diagnostic/On<br>cology | 2317<br>.50 | 1949<br>.86 | 1715.<br>91  | 1468.<br>89  | 1136.<br>24  | 1353.<br>07  | 996.1<br>5   | 751.<br>32  | 737.4<br>5   | 842.8<br>0   |

|         |            |            |            |            |            |            |            |            |            |            |
|---------|------------|------------|------------|------------|------------|------------|------------|------------|------------|------------|
| Surgery | 515.<br>96 | 485.<br>86 | 441.8<br>8 | 536.6<br>1 | 495.1<br>8 | 535.0<br>6 | 481.5<br>8 | 401.<br>63 | 448.4<br>9 | 440.7<br>6 |
| Urology | 701.<br>86 | 653.<br>23 | 574.7<br>6 | 489.4<br>8 | 576.9<br>4 | 616.5<br>3 | 522.1<br>6 | 773.<br>92 | 680.0<br>7 | 728.6<br>4 |

Supplementary Table 21: Number of active physicians per P30 grant, by specialty, 2011-2020

| Specialty                  | 2011         | 2012         | 2013         | 2014         | 2015         | 2016         | 2017          | 2018          | 2019         | 2020         |
|----------------------------|--------------|--------------|--------------|--------------|--------------|--------------|---------------|---------------|--------------|--------------|
| Anesthesiology             | Inf          | Inf          | Inf          | 4105<br>4.50 | Inf          | Inf          | Inf           | Inf           | Inf          | Inf          |
| Dermatology                | 983.6<br>4   | 1386.<br>44  | 1420.<br>38  | 1048.<br>59  | 1463.<br>25  | 989.8<br>8   | 1095.5<br>5   | 2456.7<br>0   | 3129.<br>00  | 3129.<br>00  |
| Emergency Medicine         | Inf           | Inf           | Inf          | Inf          |
| Family Medicine            | Inf          | 2693<br>3.25 | 2722<br>9.25 | 2752<br>6.50 | 2782<br>3.75 | 2810<br>1.12 | 11351<br>4.00 | 11585<br>6.00 | 2954<br>9.50 | 2954<br>9.50 |
| Internal Medicine/Medicine | 439.7<br>1   | 507.1<br>3   | 539.0<br>6   | 453.9<br>0   | 365.6<br>7   | 325.2<br>8   | 408.33        | 211.23        | 360.8<br>7   | 330.1<br>4   |
| Neurology                  | 861.0<br>7   | 686.1<br>1   | 822.2<br>5   | 948.1<br>4   | 956.5<br>7   | 847.1<br>6   | 857.31        | 773.97        | 673.6<br>2   | 442.0<br>6   |
| Neurosurgery               | 1682.<br>33  | 1703.<br>00  | 1723.<br>67  | 2629.<br>25  | 2673.<br>00  | 5438.<br>50  | 5531.0<br>0   | 5639.5<br>0   | 2874.<br>00  | Inf          |
| Obstetrics and Gynecology  | 1345<br>9.00 | 1353<br>3.83 | 2041<br>3.00 | 1371<br>7.83 | 8296.<br>20  | 6928.<br>08  | Inf           | 14062.<br>67  | 7120.<br>00  | 4272.<br>00  |
| Ophthalmology              | 578.8<br>1   | 490.0<br>0   | 610.5<br>7   | 636.3<br>8   | 581.0<br>3   | 645.0<br>0   | 648.86        | 614.98        | 665.9<br>3   | 742.7<br>7   |
| Orthopedics                | 4955.<br>50  | 4899.<br>50  | 4843.<br>50  | 3851.<br>90  | 3829.<br>00  | 3814.<br>60  | 3800.2<br>0   | 3807.0<br>0   | 3178.<br>17  | 3178.<br>17  |
| Otolaryngology             | 615.4<br>7   | 1159.<br>50  | 1331.<br>43  | 1170.<br>69  | 1568.<br>50  | 1893.<br>70  | 9526.0<br>0   | 158.22        | 9777.<br>00  | 1629.<br>50  |



|                                       |             |             |             |             |             |             |             |             |             |             |
|---------------------------------------|-------------|-------------|-------------|-------------|-------------|-------------|-------------|-------------|-------------|-------------|
| Pathology                             | 880.8<br>8  | 796.8<br>1  | 685.5<br>0  | 586.8<br>7  | 511.0<br>0  | 483.8<br>0  | 475.52      | 637.05      | 972.5<br>4  | 842.8<br>7  |
| Pediatrics                            | 3265.<br>24 | 2661.<br>21 | 2446.<br>17 | 3161.<br>25 | 3196.<br>83 | 2899.<br>45 | 3246.3<br>9 | 4960.5<br>4 | 4329.<br>86 | 2424.<br>72 |
| Physical<br>Medicine &<br>Rehab       | Inf         |
| Plastic<br>Surgery                    | Inf         |
| Psychiatry                            | 2945.<br>31 | 2519.<br>50 | 2193.<br>88 | 2501.<br>07 | 1886.<br>80 | 2920.<br>81 | 3473.1<br>8 | 4277.6<br>1 | 3526.<br>55 | 4310.<br>22 |
| Radiation-<br>Diagnostic/O<br>ncology | 6489.<br>00 | 5849.<br>58 | 7550.<br>00 | 5455.<br>86 | 4829.<br>00 | 5605.<br>57 | 3984.6<br>0 | 4057.1<br>5 | 3441.<br>42 | 3754.<br>27 |
| Surgery                               | 2024.<br>15 | 2340.<br>96 | 1679.<br>13 | 2101.<br>71 | 1052.<br>25 | 931.4<br>1  | 1252.1<br>0 | 199.24      | 1162.<br>00 | 881.5<br>2  |
| Urology                               | 1403.<br>71 | 1633.<br>08 | 1954.<br>20 | 1631.<br>58 | 1634.<br>67 | 1096.<br>06 | Inf         | Inf         | Inf         | Inf         |

Supplementary Table 22: Total R01-grant-funding, by specialty, 2011-2020, in thousands of dollars

| Specialty             | 2011      | 2012      | 2013      | 2014      | 2015      | 2016      | 2017      | 2018       | 2019       | 2020       |
|-----------------------|-----------|-----------|-----------|-----------|-----------|-----------|-----------|------------|------------|------------|
| Anesthesiology        | 7451<br>5 | 8433<br>8 | 8163<br>4 | 8814<br>8 | 8433<br>8 | 8581<br>4 | 8844<br>3 | 1053<br>16 | 1105<br>91 | 1207<br>92 |
| Dermatology           | 3982<br>1 | 4388<br>1 | 4155<br>0 | 3938<br>2 | 3980<br>3 | 4203<br>0 | 3987<br>1 | 4863<br>4  | 5051<br>3  | 4968<br>0  |
| Emergency<br>Medicine | 1211<br>9 | 1290<br>3 | 1380<br>2 | 1551<br>9 | 1662<br>8 | 1852<br>8 | 2135<br>6 | 2419<br>5  | 3106<br>3  | 4062<br>9  |
| Family<br>Medicine    | 3754<br>1 | 4149<br>9 | 3694<br>2 | 3372<br>5 | 3898<br>2 | 3871<br>1 | 3884<br>9 | 4507<br>0  | 4599<br>9  | 5259<br>5  |

|                                       |             |             |             |             |             |             |             |             |             |             |
|---------------------------------------|-------------|-------------|-------------|-------------|-------------|-------------|-------------|-------------|-------------|-------------|
| Internal<br>Medicine/Med<br>icine     | 1291<br>238 | 1251<br>856 | 1150<br>256 | 1184<br>510 | 1191<br>770 | 1289<br>757 | 1394<br>581 | 1518<br>667 | 1645<br>808 | 1793<br>562 |
| Neurology                             | 2133<br>23  | 2219<br>96  | 2134<br>88  | 2172<br>59  | 2195<br>83  | 2456<br>91  | 2824<br>68  | 3369<br>10  | 3477<br>90  | 4166<br>38  |
| Neurosurgery                          | 4818<br>8   | 5093<br>2   | 4689<br>4   | 4763<br>5   | 6123<br>5   | 6521<br>7   | 6946<br>3   | 7709<br>6   | 8549<br>2   | 9797<br>4   |
| Obstetrics and<br>Gynecology          | 5017<br>0   | 4703<br>0   | 4791<br>4   | 4801<br>5   | 5214<br>0   | 6377<br>4   | 7544<br>3   | 7906<br>5   | 9733<br>0   | 1152<br>59  |
| Ophthalmolog<br>y                     | 1435<br>57  | 1467<br>41  | 1434<br>66  | 1561<br>56  | 1478<br>80  | 1478<br>40  | 1571<br>63  | 1695<br>90  | 1863<br>35  | 1988<br>53  |
| Orthopedics                           | 3763<br>5   | 4076<br>9   | 4405<br>8   | 4446<br>6   | 4209<br>2   | 4713<br>6   | 5195<br>8   | 5550<br>2   | 6082<br>8   | 7014<br>5   |
| Otolaryngolog<br>y                    | 5199<br>2   | 5581<br>3   | 5630<br>7   | 5813<br>8   | 6342<br>3   | 6365<br>5   | 6754<br>9   | 7862<br>0   | 9174<br>9   | 9113<br>4   |
| Pathology                             | 3241<br>76  | 3183<br>96  | 2945<br>84  | 2793<br>72  | 2877<br>86  | 2957<br>75  | 2977<br>70  | 3335<br>07  | 3601<br>75  | 3872<br>11  |
| Pediatrics                            | 3124<br>75  | 3361<br>73  | 3115<br>85  | 3233<br>44  | 3140<br>62  | 3120<br>97  | 2993<br>04  | 3258<br>46  | 3446<br>60  | 3939<br>39  |
| Physical<br>Medicine &<br>Rehab       | 1124<br>7   | 1307<br>6   | 1320<br>3   | 1508<br>8   | 1366<br>9   | 1753<br>6   | 2349<br>0   | 2705<br>0   | 2845<br>1   | 3075<br>5   |
| Plastic<br>Surgery                    | 967         |             | 537         | 302         |             |             | 333         |             | 284         |             |
| Psychiatry                            | 4702<br>53  | 4593<br>42  | 4060<br>53  | 4200<br>40  | 4007<br>79  | 4316<br>51  | 4545<br>70  | 4940<br>86  | 5106<br>76  | 5459<br>09  |
| Radiation-<br>Diagnostic/On<br>cology | 2056<br>33  | 2083<br>97  | 2027<br>47  | 2013<br>25  | 2115<br>87  | 2311<br>75  | 2568<br>33  | 2937<br>65  | 3052<br>37  | 3119<br>46  |
| Surgery                               | 1466<br>86  | 1401<br>98  | 1274<br>21  | 1345<br>51  | 1428<br>24  | 1451<br>84  | 1629<br>32  | 1767<br>66  | 2023<br>67  | 2294<br>16  |
| Urology                               | 2401<br>3   | 2510<br>2   | 2502<br>1   | 2324<br>3   | 2170<br>3   | 2060<br>3   | 2324<br>0   | 2414<br>8   | 2514<br>7   | 2830<br>3   |

Supplementary Table 23: Total R03-grant-funding, by specialty, 2011-2020, in thousands of dollars

| Specialty                     | 2011    | 2012     | 2013     | 2014     | 2015    | 2016    | 2017    | 2018    | 2019     | 2020     |
|-------------------------------|---------|----------|----------|----------|---------|---------|---------|---------|----------|----------|
| Anesthesiology                | 450081  | 721092   | 442962   | 532855   | 322574  | 308213  | 386668  | 763750  | 792285   | 627476   |
| Dermatology                   | 325896  | 415990   | 151115   | 318146   | 629917  | 704687  | 535792  | 310250  | 389937   | 515420   |
| Emergency Medicine            | 63905   | 86342    | 68643    | 114000   | 415309  | 415491  | 451612  | 350895  | 194750   | 345317   |
| Family Medicine               | 736834  | 719578   | 845671   | 507967   | 429418  | 407502  | 155583  | 179250  | 552565   | 412944   |
| Internal Medicine/Medicine    | 9494800 | 11557791 | 10699669 | 10753491 | 9694220 | 7907586 | 7842786 | 8562404 | 11413933 | 13026076 |
| Neurology                     | 964605  | 656875   | 855875   | 1051369  | 1257543 | 1688365 | 1381103 | 1185473 | 1536028  | 1461973  |
| Neurosurgery                  | 391304  | 780722   | 767885   | 386897   | 593779  | 357615  | 161800  | 161079  | 160250   | 565458   |
| Obstetrics and Gynecology     | 600862  | 864239   | 764424   | 803596   | 746483  | 1003704 | 1331211 | 1390082 | 1124544  | 764667   |
| Ophthalmology                 | 0       | 0        | 0        | 195625   | 271238  | 81000   | 117750  | 194000  | 322473   | 329957   |
| Orthopedics                   | 816678  | 787365   | 876856   | 1189895  | 818017  | 500294  | 231895  | 359624  | 739085   | 632940   |
| Otolaryngology                | 1718440 | 2272345  | 2379761  | 1968522  | 1885934 | 1684593 | 1797130 | 1311104 | 320436   | 474811   |
| Pathology                     | 1925448 | 1586299  | 1437747  | 1451656  | 1241119 | 736439  | 1033500 | 1799423 | 2429442  | 2721395  |
| Pediatrics                    | 2921374 | 2413639  | 2699566  | 2605049  | 3022060 | 4009767 | 3103581 | 3812411 | 3215103  | 3705303  |
| Physical Medicine & Rehab     | 672332  | 544268   | 461397   | 600245   | 412624  | 395279  | 172249  | 491150  | 839096   | 725944   |
| Plastic Surgery               | 0       | 0        | 0        | 0        | 0       | 77000   | 77625   | 0       | 0        | 0        |
| Psychiatry                    | 2652569 | 2711582  | 2647613  | 2383628  | 2119936 | 2248675 | 2639599 | 2116041 | 1885175  | 1799338  |
| Radiation-Diagnostic/Oncology | 783679  | 518000   | 742731   | 1377746  | 1544365 | 726500  | 928242  | 1578939 | 2227240  | 2127308  |
| Surgery                       | 1364197 | 1739046  | 1377657  | 1564172  | 1504562 | 1191847 | 2115365 | 1802267 | 1024105  | 1631792  |

|         |           |            |            |            |            |            |           |           |            |            |
|---------|-----------|------------|------------|------------|------------|------------|-----------|-----------|------------|------------|
| Urology | 7800<br>0 | 24062<br>0 | 15345<br>5 | 35560<br>4 | 4711<br>48 | 2998<br>55 | 8100<br>0 | 8475<br>0 | 28525<br>1 | 38256<br>1 |
|---------|-----------|------------|------------|------------|------------|------------|-----------|-----------|------------|------------|

Supplementary Table 24: Total R21-grant-funding, by specialty, 2011-2020, in thousands of dollars

| Specialty                      | 2011      | 2012      | 2013      | 2014      | 2015      | 2016      | 2017      | 2018      | 2019      | 2020      |
|--------------------------------|-----------|-----------|-----------|-----------|-----------|-----------|-----------|-----------|-----------|-----------|
| Anesthesiology                 | 5363      | 4959      | 5614      | 5048      | 6017      | 6011      | 5305      | 7608      | 9044      | 7261      |
| Dermatology                    | 3480      | 3878      | 3706      | 4881      | 3694      | 2887      | 3101      | 3214      | 3172      | 4305      |
| Emergency Medicine             | 1418      | 1238      | 677       | 1135      | 1061      | 859       | 1056      | 1709      | 1601      | 1225      |
| Family Medicine                | 2736      | 3339      | 3520      | 3912      | 4672      | 4043      | 2436      | 2462      | 2749      | 3270      |
| Internal Medicine/Medicin<br>e | 7751<br>7 | 8220<br>1 | 7648<br>6 | 7407<br>8 | 7428<br>1 | 7967<br>1 | 7656<br>4 | 7659<br>4 | 7744<br>4 | 8491<br>0 |
| Neurology                      | 1290<br>4 | 1572<br>1 | 1468<br>8 | 1487<br>8 | 1521<br>1 | 1692<br>8 | 1746<br>2 | 1947<br>9 | 2580<br>6 | 2014<br>5 |
| Neurosurgery                   | 2414      | 3721      | 4435      | 4831      | 7289      | 7888      | 5719      | 5571      | 1174<br>5 | 1011<br>9 |
| Obstetrics and Gynecology      | 6800      | 5278      | 5734      | 4890      | 5247      | 4730      | 4449      | 5749      | 6279      | 9901      |
| Ophthalmology                  | 3884      | 3860      | 5863      | 5643      | 8032      | 6662      | 4941      | 6515      | 1147<br>4 | 1121<br>5 |
| Orthopedics                    | 2763      | 3619      | 3394      | 2686      | 2878      | 2916      | 5150      | 7074      | 4837      | 5113      |
| Otolaryngology                 | 2673      | 3242      | 4612      | 5060      | 4484      | 2935      | 2973      | 5233      | 5598      | 6832      |
| Pathology                      | 2426<br>7 | 2131<br>6 | 2245<br>7 | 2884<br>5 | 3301<br>3 | 3318<br>0 | 2828<br>1 | 2435<br>9 | 2405<br>3 | 2573<br>4 |
| Pediatrics                     | 1994<br>3 | 1942<br>6 | 1982<br>0 | 2209<br>8 | 2476<br>0 | 2498<br>0 | 2366<br>3 | 2469<br>7 | 2738<br>2 | 3032<br>9 |

|                               |           |           |           |           |           |           |           |           |           |           |
|-------------------------------|-----------|-----------|-----------|-----------|-----------|-----------|-----------|-----------|-----------|-----------|
| Physical Medicine & Rehab     | 781       | 1430      | 2185      | 1664      | 700       | 1979      | 2772      | 2106      | 2839      | 2457      |
| Plastic Surgery               | 0         | 0         | 0         | 0         | 0         | 0         | 0         | 0         | 0         | 0         |
| Psychiatry                    | 2522<br>3 | 3486<br>1 | 3825<br>9 | 3637<br>2 | 3181<br>8 | 3114<br>4 | 3168<br>5 | 3100<br>6 | 3352<br>9 | 3924<br>8 |
| Radiation-Diagnostic/Oncology | 2043<br>8 | 2177<br>8 | 2027<br>1 | 2369<br>4 | 2549<br>6 | 2402<br>0 | 2273<br>5 | 1806<br>6 | 2187<br>2 | 2485<br>9 |
| Surgery                       | 1114<br>9 | 1066<br>2 | 8942      | 1023<br>7 | 1282<br>3 | 1337<br>1 | 9947      | 9617      | 1032<br>0 | 1247<br>1 |
| Urology                       | 1626      | 1730      | 838       | 740       | 1802      | 2463      | 1761      | 1385      | 1519      | 2247      |

Supplementary Table 25: Total F32-grant-funding, by specialty, 2011-2020, in thousands of dollars

| Specialty                  | 2011 | 2012 | 2013 | 2014 | 2015 | 2016 | 2017 | 2018 | 2019 | 2020 |
|----------------------------|------|------|------|------|------|------|------|------|------|------|
| Anesthesiology             | 192  | 309  | 397  | 305  | 24   | 58   | 171  | 288  | 122  | 390  |
| Dermatology                | 173  | 223  | 156  | 86   | 149  | 167  | 231  | 233  | 66   | 198  |
| Emergency Medicine         | 59   | 54   | 62   | 0    | 0    | 0    | 0    | 0    | 0    | 65   |
| Family Medicine            | 0    | 0    | 0    | 56   | 20   | 0    | 0    | 0    | 0    | 0    |
| Internal Medicine/Medicine | 6543 | 5803 | 5850 | 5543 | 5833 | 6417 | 6236 | 6436 | 6670 | 7700 |
| Neurology                  | 732  | 449  | 964  | 1539 | 1457 | 1296 | 1234 | 1520 | 1584 | 1393 |
| Neurosurgery               | 421  | 365  | 338  | 413  | 503  | 538  | 529  | 802  | 443  | 726  |
| Obstetrics and Gynecology  | 209  | 290  | 175  | 215  | 276  | 229  | 146  | 356  | 310  | 304  |
| Ophthalmology              | 180  | 351  | 385  | 491  | 644  | 398  | 430  | 420  | 532  | 567  |
| Orthopedics                | 247  | 288  | 252  | 231  | 321  | 288  | 331  | 429  | 446  | 471  |
| Otolaryngology             | 527  | 384  | 355  | 508  | 297  | 463  | 595  | 542  | 500  | 434  |
| Pathology                  | 1141 | 865  | 955  | 1023 | 1207 | 1368 | 892  | 1052 | 980  | 726  |

|                               |      |      |      |      |      |      |      |      |      |      |
|-------------------------------|------|------|------|------|------|------|------|------|------|------|
| Pediatrics                    | 1339 | 1416 | 1246 | 1229 | 867  | 773  | 737  | 762  | 1158 | 667  |
| Physical Medicine & Rehab     | 51   | 52   | 0    | 56   | 41   | 69   | 188  | 246  | 197  | 137  |
| Plastic Surgery               | 0    | 0    | 0    | 0    | 0    | 0    | 0    | 0    | 71   | 0    |
| Psychiatry                    | 1921 | 1391 | 1318 | 1254 | 1424 | 1560 | 1178 | 1385 | 1700 | 2021 |
| Radiation-Diagnostic/Oncology | 708  | 400  | 185  | 55   | 112  | 478  | 383  | 429  | 269  | 456  |
| Surgery                       | 831  | 760  | 662  | 983  | 1149 | 1027 | 942  | 1285 | 1008 | 1091 |
| Urology                       | 116  | 106  | 111  | 223  | 121  | 156  | 118  | 74   | 66   | 80   |

Supplementary Table 26: Total T32-grant-funding, by specialty, 2011-2020, in thousands of dollars

| Specialty                  | 2011       | 2012       | 2013       | 2014       | 2015       | 2016       | 2017       | 2018       | 2019       | 2020       |
|----------------------------|------------|------------|------------|------------|------------|------------|------------|------------|------------|------------|
| Anesthesiology             | 2305       | 2641       | 2729       | 3258       | 4813       | 4967       | 5373       | 5038       | 5083       | 4496       |
| Dermatology                | 2246       | 2446       | 2263       | 1840       | 2359       | 2357       | 2268       | 2180       | 1957       | 2035       |
| Emergency Medicine         | 0          | 0          | 0          | 0          | 0          | 169        | 740        | 894        | 916        | 731        |
| Family Medicine            | 1235       | 1172       | 1528       | 1487       | 1507       | 1328       | 2196       | 1739       | 1472       | 1750       |
| Internal Medicine/Medicine | 1150<br>16 | 1159<br>50 | 1116<br>68 | 1114<br>59 | 1153<br>27 | 1198<br>32 | 1200<br>62 | 1326<br>78 | 1345<br>51 | 1392<br>63 |
| Neurology                  | 9544       | 8462       | 8315       | 1003<br>0  | 9009       | 9960       | 1080<br>2  | 1127<br>6  | 9092       | 1152<br>4  |
| Neurosurgery               | 592        | 531        | 582        | 600        | 1739       | 1820       | 1644       | 2273       | 3672       | 4010       |
| Obstetrics and Gynecology  | 2392       | 2382       | 2526       | 2622       | 2685       | 2442       | 2154       | 1666       | 1762       | 2863       |
| Ophthalmology              | 2879       | 3175       | 4438       | 4390       | 4005       | 3857       | 3762       | 4064       | 4869       | 4752       |
| Orthopedics                | 1751       | 2082       | 1823       | 1617       | 1686       | 1676       | 1832       | 1568       | 1675       | 2073       |

|                                       |           |           |           |           |           |           |           |           |           |           |
|---------------------------------------|-----------|-----------|-----------|-----------|-----------|-----------|-----------|-----------|-----------|-----------|
| Otolaryngology                        | 2477      | 3339      | 2847      | 3672      | 3961      | 3768      | 4342      | 4372      | 4284      | 4832      |
| Pathology                             | 3274<br>7 | 2919<br>5 | 2624<br>6 | 2690<br>6 | 2447<br>8 | 2405<br>1 | 2507<br>0 | 2467<br>5 | 2280<br>5 | 2017<br>9 |
| Pediatrics                            | 2447<br>0 | 2400<br>6 | 2265<br>7 | 2165<br>3 | 2448<br>2 | 2454<br>8 | 2192<br>7 | 2424<br>6 | 2504<br>7 | 2578<br>6 |
| Physical<br>Medicine &<br>Rehab       | 1431      | 1068      | 1092      | 844       | 939       | 1004      | 1063      | 1287      | 1263      | 1605      |
| Plastic Surgery                       | 0         | 0         | 0         | 0         | 0         | 0         | 0         | 0         | 0         | 0         |
| Psychiatry                            | 2005<br>6 | 2066<br>3 | 2032<br>3 | 1911<br>2 | 1813<br>4 | 2031<br>1 | 2113<br>2 | 2154<br>5 | 2270<br>2 | 2607<br>5 |
| Radiation-<br>Diagnostic/Onco<br>logy | 5579      | 4095      | 4651      | 4886      | 5477      | 7208      | 6005      | 7795      | 7771      | 6639      |
| Surgery                               | 1260<br>9 | 1227<br>3 | 1125<br>3 | 1080<br>6 | 1050<br>1 | 1232<br>7 | 1319<br>8 | 1601<br>2 | 1786<br>3 | 1644<br>2 |
| Urology                               | 1084      | 1224      | 1151      | 1166      | 648       | 906       | 623       | 335       | 989       | 1156      |

Supplementary Table 27: Total K01-grant-funding, by specialty, 2011-2020, in thousands of dollars

| <b>Specialty</b>                  | <b>2011</b> | <b>2012</b> | <b>2013</b> | <b>2014</b> | <b>2015</b> | <b>2016</b> | <b>2017</b> | <b>2018</b> | <b>2019</b> | <b>2020</b> |
|-----------------------------------|-------------|-------------|-------------|-------------|-------------|-------------|-------------|-------------|-------------|-------------|
| Anesthesiology                    | 480         | 485         | 463         | 613         | 884         | 888         | 1031        | 1209        | 655         | 990         |
| Dermatology                       | 375         | 467         | 596         | 445         | 647         | 779         | 1280        | 1341        | 1030        | 940         |
| Emergency<br>Medicine             | 0           | 136         | 134         | 132         | 276         | 0           | 0           | 41          | 123         | 247         |
| Family Medicine                   | 1241        | 1561        | 1182        | 896         | 930         | 1072        | 1086        | 1278        | 1167        | 2082        |
| Internal<br>Medicine/Medicin<br>e | 1657<br>6   | 1539<br>3   | 1561<br>2   | 1872<br>1   | 2055<br>7   | 1898<br>0   | 1947<br>3   | 2201<br>7   | 2436<br>6   | 2477<br>1   |
| Neurology                         | 1619        | 1813        | 2313        | 2554        | 2501        | 2809        | 2734        | 2635        | 2983        | 2344        |

|                               |           |           |           |           |           |           |           |           |           |           |
|-------------------------------|-----------|-----------|-----------|-----------|-----------|-----------|-----------|-----------|-----------|-----------|
| Neurosurgery                  | 298       | 241       | 127       | 0         | 0         | 105       | 0         | 318       | 454       | 328       |
| Obstetrics and Gynecology     | 279       | 171       | 313       | 640       | 779       | 742       | 953       | 771       | 1024      | 1114      |
| Ophthalmology                 | 0         | 0         | 0         | 131       | 0         | 0         | 145       | 253       | 260       | 145       |
| Orthopedics                   | 618       | 472       | 808       | 850       | 1105      | 885       | 750       | 615       | 700       | 588       |
| Otolaryngology                | 274       | 274       | 274       | 260       | 0         | 0         | 0         | 0         | 0         | 130       |
| Pathology                     | 1538      | 1635      | 1698      | 1500      | 1507      | 2011      | 2106      | 2359      | 2072      | 2764      |
| Pediatrics                    | 2485      | 2140      | 2285      | 2465      | 2174      | 3086      | 3156      | 3056      | 3452      | 3592      |
| Physical Medicine & Rehab     | 344       | 365       | 489       | 733       | 864       | 992       | 1686      | 1664      | 1336      | 1510      |
| Plastic Surgery               | 0         | 0         | 0         | 0         | 0         | 0         | 0         | 0         | 0         | 0         |
| Psychiatry                    | 1204<br>1 | 1215<br>1 | 1104<br>2 | 1143<br>3 | 1073<br>2 | 1018<br>0 | 1047<br>5 | 1018<br>9 | 1110<br>1 | 1221<br>9 |
| Radiation-Diagnostic/Oncology | 2091      | 1961      | 1517      | 1575      | 1710      | 1929      | 2705      | 2437      | 1931      | 1512      |
| Surgery                       | 999       | 861       | 1240      | 886       | 1353      | 1716      | 2081      | 1590      | 1374      | 1012      |
| Urology                       | 106       | 106       | 106       | 137       | 440       | 594       | 846       | 700       | 699       | 869       |

Supplementary Table 28: Total K08-grant-funding, by specialty, 2011-2020, in thousands of dollars

| Specialty          | 2011 | 2012 | 2013 | 2014 | 2015 | 2016 | 2017 | 2018 | 2019 | 2020 |
|--------------------|------|------|------|------|------|------|------|------|------|------|
| Anesthesiology     | 1636 | 1831 | 2071 | 2275 | 2120 | 2058 | 2662 | 3792 | 4516 | 3980 |
| Dermatology        | 2225 | 2309 | 1938 | 1733 | 1802 | 1934 | 1958 | 1802 | 2016 | 1629 |
| Emergency Medicine | 283  | 568  | 875  | 593  | 746  | 1091 | 1136 | 1284 | 1113 | 1121 |
| Family Medicine    | 611  | 616  | 678  | 275  | 148  | 146  | 168  | 168  | 515  | 504  |



|                                       |           |           |           |           |           |           |           |           |           |           |
|---------------------------------------|-----------|-----------|-----------|-----------|-----------|-----------|-----------|-----------|-----------|-----------|
| Internal<br>Medicine/Medicin<br>e     | 3752<br>8 | 3634<br>6 | 3327<br>7 | 3424<br>1 | 3202<br>2 | 3717<br>8 | 3744<br>3 | 4160<br>2 | 4661<br>0 | 4712<br>3 |
| Neurology                             | 6333      | 5782      | 6588      | 5789      | 5803      | 5416      | 5683      | 5691      | 6525      | 7391      |
| Neurosurgery                          | 1160      | 1197      | 1446      | 1153      | 1658      | 1867      | 2222      | 2009      | 2370      | 1805      |
| Obstetrics and<br>Gynecology          | 1072      | 1077      | 952       | 598       | 244       | 374       | 334       | 907       | 1110      | 1675      |
| Ophthalmology                         | 4904      | 5063      | 5336      | 6174      | 6111      | 5435      | 5502      | 5280      | 5054      | 4877      |
| Orthopedics                           | 179       | 269       | 519       | 438       | 485       | 871       | 1201      | 1031      | 847       | 990       |
| Otolaryngology                        | 1995      | 2189      | 2122      | 1833      | 2265      | 2069      | 1684      | 1933      | 2167      | 1880      |
| Pathology                             | 4861      | 4286      | 4572      | 4859      | 4564      | 3929      | 3803      | 4681      | 4720      | 5225      |
| Pediatrics                            | 1501<br>4 | 1322<br>0 | 1296<br>0 | 1237<br>2 | 1167<br>0 | 1342<br>0 | 1714<br>1 | 1954<br>8 | 1939<br>7 | 1877<br>3 |
| Physical Medicine<br>& Rehab          | 125       | 125       | 125       | 0         | 0         | 0         | 0         | 171       | 171       | 172       |
| Plastic Surgery                       | 0         | 0         | 0         | 0         | 0         | 0         | 0         | 0         | 0         | 0         |
| Psychiatry                            | 5684      | 5023      | 3287      | 4502      | 3704      | 3895      | 4264      | 3698      | 3256      | 4261      |
| Radiation-<br>Diagnostic/Oncolo<br>gy | 811       | 820       | 820       | 915       | 832       | 172       | 532       | 610       | 2888      | 3757      |
| Surgery                               | 7904      | 8045      | 6671      | 6572      | 5420      | 6127      | 6343      | 7333      | 7654      | 8321      |
| Urology                               | 1217      | 1197      | 1391      | 1060      | 662       | 824       | 843       | 830       | 1111      | 1098      |

Supplementary Table 29: Total K23-grant-funding, by specialty, 2011-2020, in thousands of dollars

| Specialty      | 2011 | 2012 | 2013 | 2014 | 2015 | 2016 | 2017 | 2018 | 2019 | 2020 |
|----------------|------|------|------|------|------|------|------|------|------|------|
| Anesthesiology | 1200 | 1558 | 1839 | 2035 | 1853 | 1538 | 2247 | 2154 | 3073 | 2977 |
| Dermatology    | 368  | 491  | 252  | 123  | 257  | 669  | 694  | 1364 | 1557 | 1339 |

|                                |           |           |           |           |           |           |           |           |           |           |
|--------------------------------|-----------|-----------|-----------|-----------|-----------|-----------|-----------|-----------|-----------|-----------|
| Emergency Medicine             | 2344      | 2111      | 2311      | 2158      | 2213      | 3113      | 3733      | 3333      | 3579      | 2590      |
| Family Medicine                | 1388      | 1256      | 901       | 440       | 648       | 585       | 808       | 801       | 985       | 1100      |
| Internal Medicine/Medicin<br>e | 4438<br>6 | 4617<br>6 | 4566<br>9 | 4407<br>7 | 4058<br>7 | 4338<br>8 | 4324<br>8 | 4408<br>7 | 4495<br>3 | 5023<br>5 |
| Neurology                      | 8996      | 8961      | 7778      | 8382      | 8632      | 7030      | 8764      | 9346      | 1030<br>1 | 1053<br>4 |
| Neurosurgery                   | 372       | 712       | 922       | 695       | 840       | 727       | 734       | 735       | 927       | 1123      |
| Obstetrics and Gynecology      | 1602      | 1806      | 1387      | 1695      | 1160      | 648       | 1143      | 1352      | 1734      | 2034      |
| Ophthalmology                  | 2853      | 2347      | 2644      | 2238      | 2693      | 4070      | 4562      | 4059      | 4513      | 4234      |
| Orthopedics                    | 337       | 391       | 320       | 318       | 195       | 347       | 173       | 369       | 494       | 548       |
| Otolaryngology                 | 1485      | 1252      | 1235      | 1902      | 2599      | 2144      | 2433      | 2431      | 2297      | 1823      |
| Pathology                      | 517       | 400       | 265       | 405       | 277       | 137       | 146       | 142       | 190       | 528       |
| Pediatrics                     | 1295<br>0 | 1274<br>3 | 1230<br>1 | 1211<br>2 | 1097<br>4 | 1025<br>3 | 1488<br>3 | 1637<br>8 | 1882<br>5 | 2228<br>3 |
| Physical Medicine & Rehab      | 994       | 943       | 1511      | 1638      | 1305      | 1231      | 992       | 270       | 454       | 442       |
| Plastic Surgery                | 0         | 0         | 0         | 0         | 0         | 0         | 0         | 0         | 0         | 0         |
| Psychiatry                     | 1906<br>8 | 1820<br>3 | 1684<br>1 | 1611<br>5 | 1564<br>7 | 1531<br>8 | 1808<br>4 | 1791<br>0 | 1934<br>9 | 1964<br>2 |
| Radiation-Diagnostic/Oncology  | 952       | 659       | 632       | 650       | 647       | 694       | 723       | 359       | 196       | 578       |
| Surgery                        | 1704      | 1671      | 1479      | 1572      | 1469      | 1940      | 1610      | 1465      | 1556      | 2246      |
| Urology                        | 314       | 154       | 297       | 465       | 301       | 436       | 312       | 144       | 505       | 503       |

Supplementary Table 30: Total U01-grant-funding, by specialty, 2011-2020, in thousands of dollars

| Specialty                             | 2011       | 2012       | 2013       | 2014       | 2015       | 2016       | 2017       | 2018       | 2019       | 2020       |
|---------------------------------------|------------|------------|------------|------------|------------|------------|------------|------------|------------|------------|
| Anesthesiology                        | 3304       | 3157       | 3516       | 6975       | 5936       | 1208<br>6  | 9053       | 8374       | 1142<br>6  | 1025<br>7  |
| Dermatology                           | 810        | 2506       | 2458       | 2239       | 4082       | 2749       | 3182       | 3562       | 8176       | 5268       |
| Emergency<br>Medicine                 | 1824<br>3  | 1687<br>5  | 8205       | 7022       | 4410       | 3305       | 6454       | 2526<br>3  | 1974       | 1428<br>4  |
| Family<br>Medicine                    | 5269       | 8212       | 8912       | 9833       | 1183<br>0  | 9649       | 6264       | 8843       | 9972       | 8087       |
| Internal<br>Medicine/Medic<br>ine     | 3948<br>66 | 3847<br>02 | 4276<br>05 | 4160<br>81 | 3698<br>49 | 3556<br>12 | 3921<br>59 | 4205<br>65 | 6163<br>27 | 6980<br>31 |
| Neurology                             | 6174<br>5  | 6881<br>9  | 7151<br>6  | 7922<br>0  | 6468<br>2  | 8785<br>2  | 7039<br>8  | 1118<br>16 | 1028<br>85 | 1392<br>49 |
| Neurosurgery                          | 4610       | 4594       | 1565<br>5  | 1503<br>8  | 1144<br>1  | 2576<br>4  | 2726<br>5  | 1388<br>4  | 6841       | 5592       |
| Obstetrics and<br>Gynecology          | 2540<br>1  | 1705<br>1  | 5216       | 1101<br>0  | 4741<br>4  | 9749       | 8790       | 1228<br>7  | 8037       | 8465       |
| Ophthalmology                         | 2346       | 2450       | 1937       | 1356       | 2967       | 3727       | 3876       | 6158       | 6809       | 7941       |
| Orthopedics                           | 0          | 0          | 522        | 657        | 197        | 197        | 0          | 0          | 705        | 648        |
| Otolaryngology                        | 1413       | 830        | 1142       | 1049       | 2611       | 2399       | 2901       | 4027       | 2151       | 3110       |
| Pathology                             | 4526<br>2  | 2968<br>0  | 2722<br>2  | 1965<br>3  | 1964<br>1  | 2484<br>7  | 2706<br>1  | 3252<br>4  | 2990<br>7  | 3218<br>2  |
| Pediatrics                            | 9805<br>3  | 9934<br>6  | 9110<br>2  | 1010<br>82 | 9401<br>7  | 8503<br>2  | 8497<br>7  | 8793<br>3  | 8276<br>0  | 7389<br>3  |
| Physical<br>Medicine &<br>Rehab       | 569        | 622        | 3799       | 3484       | 3891       | 3623       | 3575       | 1940       | 5081       | 7806       |
| Plastic Surgery                       | 0          | 0          | 0          | 0          | 0          | 0          | 0          | 430        | 430        | 430        |
| Psychiatry                            | 4154<br>8  | 5872<br>6  | 5347<br>0  | 6094<br>1  | 6738<br>3  | 5938<br>0  | 5137<br>0  | 5861<br>5  | 9270<br>4  | 7893<br>9  |
| Radiation-<br>Diagnostic/Onco<br>logy | 6629       | 8597       | 1387<br>3  | 1715<br>9  | 1955<br>8  | 1733<br>8  | 3511<br>4  | 3746<br>2  | 3960<br>1  | 3837<br>6  |

|         |           |           |           |           |           |           |           |           |           |           |
|---------|-----------|-----------|-----------|-----------|-----------|-----------|-----------|-----------|-----------|-----------|
| Surgery | 2943<br>3 | 3919<br>9 | 3881<br>3 | 3428<br>9 | 4016<br>7 | 3572<br>1 | 3184<br>7 | 3918<br>4 | 4017<br>1 | 3272<br>2 |
| Urology | 1345<br>3 | 1134<br>3 | 1181<br>0 | 7735      | 6550      | 7265      | 7641      | 6918      | 1061<br>7 | 5158      |

Supplementary Table 31: Total P30-grant-funding, by specialty, 2011-2020, in thousands of dollars

| Specialty                  | 2011       | 2012       | 2013       | 2014       | 2015       | 2016       | 2017       | 2018       | 2019       | 2020       |
|----------------------------|------------|------------|------------|------------|------------|------------|------------|------------|------------|------------|
| Anesthesiology             | 0          | 0          | 0          | 1000       | 0          | 0          | 0          | 0          | 0          | 0          |
| Dermatology                | 5597       | 4335       | 6056       | 6889       | 6479       | 7431       | 6547       | 3292       | 3102       | 3109       |
| Emergency Medicine         | 0          | 0          | 0          | 0          | 0          | 0          | 0          | 0          | 0          | 0          |
| Family Medicine            | 0          | 480        | 473        | 475        | 475        | 475        | 1499       | 1632       | 2024       | 2317       |
| Internal Medicine/Medicine | 2962<br>35 | 3204<br>54 | 3394<br>82 | 3956<br>55 | 3591<br>49 | 3709<br>38 | 3822<br>60 | 3907<br>65 | 4538<br>63 | 4911<br>28 |
| Neurology                  | 1364<br>4  | 1506<br>3  | 1399<br>8  | 1296<br>4  | 1337<br>1  | 1459<br>3  | 1461<br>7  | 1664<br>3  | 2110<br>5  | 4901<br>4  |
| Neurosurgery               | 1890       | 2651       | 2501       | 1789       | 1749       | 638        | 625        | 612        | 698        | 0          |
| Obstetrics and Gynecology  | 5801       | 5801       | 5158       | 5379       | 5786       | 5762       | 0          | 2477       | 2907       | 5170       |
| Ophthalmology              | 1874<br>9  | 2160<br>9  | 1762<br>4  | 1728<br>4  | 1666<br>1  | 1568<br>5  | 1570<br>3  | 1755<br>6  | 1758<br>8  | 1721<br>5  |
| Orthopedics                | 2502       | 2510       | 2391       | 3072       | 3059       | 3517       | 3485       | 3459       | 4536       | 4510       |
| Otolaryngology             | 4978       | 4832       | 4602       | 4455       | 2996       | 2292       | 615        | 5495       | 5130       | 7681       |
| Pathology                  | 2499<br>4  | 1723<br>3  | 3630<br>5  | 3624<br>2  | 3370<br>8  | 4277<br>7  | 3562<br>4  | 1409<br>0  | 1285<br>8  | 1637<br>5  |
| Pediatrics                 | 2628<br>9  | 2322<br>3  | 2224<br>4  | 1706<br>9  | 1697<br>6  | 1490<br>6  | 1437<br>0  | 1093<br>5  | 1168<br>1  | 1715<br>5  |

|                               |           |           |           |           |           |           |           |           |           |           |
|-------------------------------|-----------|-----------|-----------|-----------|-----------|-----------|-----------|-----------|-----------|-----------|
| Physical Medicine & Rehab     | 0         | 0         | 0         | 0         | 0         | 0         | 0         | 0         | 0         | 0         |
| Plastic Surgery               | 0         | 0         | 0         | 0         | 0         | 0         | 0         | 0         | 0         | 0         |
| Psychiatry                    | 1766<br>8 | 1715<br>9 | 1952<br>0 | 1617<br>9 | 1831<br>6 | 1346<br>4 | 1166<br>6 | 9558      | 8712      | 9759      |
| Radiation-Diagnostic/Oncology | 2851      | 3786      | 4292      | 5930      | 1182<br>3 | 6816      | 8877      | 8628      | 1130<br>8 | 1289<br>7 |
| Surgery                       | 2523<br>8 | 2148<br>4 | 2429<br>8 | 1597<br>3 | 2529<br>6 | 2536<br>3 | 3762<br>9 | 3424<br>2 | 2982<br>5 | 4273<br>9 |
| Urology                       | 4835      | 4726      | 3941      | 5304      | 5342      | 6332      | 0         | 0         | 0         | 0         |

Supplementary Table 32: R01-grant-funding per active physician, by specialty, 2011-2020

| Specialty                  | 2011         | 2012         | 2013         | 2014         | 2015         | 2016         | 2017         | 2018         | 2019         | 2020         |
|----------------------------|--------------|--------------|--------------|--------------|--------------|--------------|--------------|--------------|--------------|--------------|
| Anesthesiology             | 1857.<br>17  | 2085.<br>47  | 2002.<br>89  | 2147.<br>10  | 2039.<br>57  | 2065.<br>00  | 2117.<br>78  | 2506.<br>67  | 2616.<br>49  | 2857.<br>83  |
| Dermatology                | 3680.<br>31  | 3956.<br>23  | 3656.<br>59  | 3414.<br>25  | 3400.<br>26  | 3538.<br>30  | 3308.<br>52  | 3959.<br>33  | 4035.<br>89  | 3969.<br>33  |
| Emergency Medicine         | 356.5<br>9   | 362.3<br>2   | 370.6<br>1   | 404.0<br>5   | 420.1<br>2   | 452.3<br>0   | 504.3<br>0   | 552.7<br>0   | 687.1<br>9   | 898.8<br>4   |
| Family Medicine            | 352.3<br>4   | 385.2<br>0   | 339.1<br>7   | 306.2<br>9   | 350.2<br>5   | 344.3<br>9   | 342.2<br>4   | 389.0<br>1   | 389.1<br>7   | 444.9<br>7   |
| Internal Medicine/Medicine | 11841<br>.01 | 11375<br>.60 | 10358<br>.28 | 10522<br>.61 | 10445<br>.97 | 11232<br>.57 | 12068<br>.33 | 12884<br>.91 | 13695<br>.55 | 14925<br>.08 |
| Neurology                  | 16516<br>.17 | 17029<br>.48 | 16227<br>.40 | 16367<br>.29 | 16396<br>.56 | 18126<br>.12 | 20592<br>.56 | 24183<br>.35 | 24585<br>.73 | 29452<br>.72 |
| Neurosurgery               | 9547.<br>89  | 9969.<br>06  | 9068.<br>75  | 9058.<br>58  | 11454<br>.43 | 11991<br>.81 | 12558<br>.93 | 13670<br>.75 | 14873<br>.42 | 17044<br>.80 |

|                               |          |          |          |          |          |          |          |          |          |          |
|-------------------------------|----------|----------|----------|----------|----------|----------|----------|----------|----------|----------|
| Obstetrics and Gynecology     | 1242.54  | 1158.34  | 1173.61  | 1166.74  | 1256.97  | 1534.18  | 1811.10  | 1874.12  | 2278.34  | 2698.02  |
| Ophthalmology                 | 8000.73  | 8093.83  | 7832.38  | 8461.44  | 7953.54  | 7903.77  | 8352.17  | 8895.57  | 9648.68  | 10296.89 |
| Orthopedics                   | 1898.66  | 2080.26  | 2274.09  | 2308.81  | 2198.59  | 2471.33  | 2734.49  | 2915.80  | 3189.91  | 3678.49  |
| Otolaryngology                | 5631.72  | 6016.96  | 6041.57  | 6207.68  | 6739.23  | 6722.77  | 7091.05  | 8145.93  | 9384.18  | 9321.23  |
| Pathology                     | 21647.85 | 22199.46 | 21486.80 | 20697.31 | 21660.82 | 22643.09 | 23192.63 | 26175.89 | 28488.09 | 30626.48 |
| Pediatrics                    | 5629.26  | 6015.39  | 5538.10  | 5682.43  | 5457.86  | 5382.00  | 5122.00  | 5473.96  | 5685.77  | 6498.71  |
| Physical Medicine & Rehab     | 1322.77  | 1502.20  | 1482.51  | 1669.98  | 1491.60  | 1895.05  | 2514.18  | 2830.94  | 2912.92  | 3148.88  |
| Plastic Surgery               | 141.77   | 0.00     | 77.41    | 43.23    | 0.00     | 0.00     | 46.66    | 0.00     | 38.79    | 0.00     |
| Psychiatry                    | 12281.68 | 12154.31 | 10887.32 | 11196.29 | 10620.60 | 11368.05 | 11898.19 | 12833.89 | 13164.48 | 14072.72 |
| Radiation-Diagnostic/Oncology | 6337.90  | 5937.65  | 5370.79  | 5271.53  | 5476.99  | 5891.45  | 6445.64  | 7240.69  | 7391.27  | 7553.73  |
| Surgery                       | 5574.43  | 5444.49  | 5059.00  | 5335.00  | 5655.51  | 5773.19  | 6506.34  | 6985.99  | 7916.08  | 8974.18  |
| Urology                       | 2443.77  | 2561.83  | 2560.75  | 2374.32  | 2212.76  | 2088.62  | 2342.54  | 2400.19  | 2465.14  | 2774.51  |

Supplementary Table 33: R03-grant-funding per active physician, by specialty, 2011-2020

| Specialty      | 2011  | 2012  | 2013  | 2014  | 2015  | 2016  | 2017  | 2018  | 2019  | 2020  |
|----------------|-------|-------|-------|-------|-------|-------|-------|-------|-------|-------|
| Anesthesiology | 11.22 | 17.83 | 10.87 | 12.98 | 7.80  | 7.42  | 9.26  | 18.18 | 18.74 | 14.85 |
| Dermatology    | 30.12 | 37.51 | 13.30 | 27.58 | 53.81 | 59.32 | 44.46 | 25.26 | 31.16 | 41.18 |

|                               |        |        |        |        |        |        |        |        |        |        |
|-------------------------------|--------|--------|--------|--------|--------|--------|--------|--------|--------|--------|
| Emergency Medicine            | 1.88   | 2.42   | 1.84   | 2.97   | 10.49  | 10.14  | 10.66  | 8.02   | 4.31   | 7.64   |
| Family Medicine               | 6.92   | 6.68   | 7.76   | 4.61   | 3.86   | 3.63   | 1.37   | 1.55   | 4.67   | 3.49   |
| Internal Medicine/Medicine    | 87.07  | 105.03 | 96.35  | 95.53  | 84.97  | 68.87  | 67.87  | 72.65  | 94.98  | 108.40 |
| Neurology                     | 74.68  | 50.39  | 65.06  | 79.21  | 93.90  | 124.56 | 100.69 | 85.09  | 108.58 | 103.35 |
| Neurosurgery                  | 77.53  | 152.81 | 148.50 | 73.58  | 111.07 | 65.76  | 29.25  | 28.56  | 27.88  | 98.37  |
| Obstetrics and Gynecology     | 14.88  | 21.29  | 18.72  | 19.53  | 18.00  | 24.15  | 31.96  | 32.95  | 26.32  | 17.90  |
| Ophthalmology                 | 0.00   | 0.00   | 0.00   | 10.60  | 14.59  | 4.33   | 6.26   | 10.18  | 16.70  | 17.09  |
| Orthopedics                   | 41.20  | 40.18  | 45.26  | 61.78  | 42.73  | 26.23  | 12.20  | 18.89  | 38.76  | 33.19  |
| Otolaryngology                | 186.14 | 244.97 | 255.34 | 210.19 | 200.40 | 177.92 | 188.66 | 135.84 | 32.77  | 48.56  |
| Pathology                     | 128.58 | 110.60 | 104.87 | 107.55 | 93.42  | 56.38  | 80.50  | 141.23 | 192.16 | 215.25 |
| Pediatrics                    | 52.63  | 43.19  | 47.98  | 45.78  | 52.52  | 69.15  | 53.11  | 64.05  | 53.04  | 61.13  |
| Physical Medicine & Rehab     | 79.07  | 62.53  | 51.81  | 66.44  | 45.03  | 42.72  | 18.44  | 51.40  | 85.91  | 74.33  |
| Plastic Surgery               | 0.00   | 0.00   | 0.00   | 0.00   | 0.00   | 10.87  | 10.87  | 0.00   | 0.00   | 0.00   |
| Psychiatry                    | 69.28  | 71.75  | 70.99  | 63.54  | 56.18  | 59.22  | 69.09  | 54.96  | 48.60  | 46.38  |
| Radiation-Diagnostic/Oncology | 24.15  | 14.76  | 19.67  | 36.08  | 39.98  | 18.51  | 23.30  | 38.92  | 53.93  | 51.51  |
| Surgery                       | 51.84  | 67.53  | 54.70  | 62.02  | 59.58  | 47.39  | 84.47  | 71.23  | 40.06  | 63.83  |
| Urology                       | 7.94   | 24.56  | 15.71  | 36.33  | 48.04  | 30.40  | 8.16   | 8.42   | 27.96  | 37.50  |

Supplementary Table 34: R21-grant-funding per active physician, by specialty, 2011-2020

| Specialty                         | 2011        | 2012        | 2013        | 2014        | 2015        | 2016        | 2017        | 2018        | 2019        | 2020        |
|-----------------------------------|-------------|-------------|-------------|-------------|-------------|-------------|-------------|-------------|-------------|-------------|
| Anesthesiology                    | 133.6<br>6  | 122.6<br>4  | 137.7<br>4  | 122.9<br>6  | 145.5<br>1  | 144.6<br>5  | 127.0<br>3  | 181.0<br>7  | 213.9<br>7  | 171.7<br>9  |
| Dermatology                       | 321.6<br>1  | 349.6<br>7  | 326.1<br>5  | 423.1<br>6  | 315.5<br>7  | 243.0<br>0  | 257.3<br>0  | 261.6<br>4  | 253.4<br>1  | 343.9<br>6  |
| Emergency<br>Medicine             | 41.72       | 34.77       | 18.18       | 29.54       | 26.80       | 20.98       | 24.94       | 39.04       | 35.41       | 27.11       |
| Family<br>Medicine                | 25.67       | 30.99       | 32.31       | 35.53       | 41.98       | 35.97       | 21.46       | 21.25       | 23.26       | 27.66       |
| Internal<br>Medicine/Medi<br>cine | 710.8<br>5  | 746.9<br>6  | 688.7<br>7  | 658.0<br>7  | 651.0<br>8  | 693.8<br>6  | 662.5<br>6  | 649.8<br>5  | 644.4<br>5  | 706.5<br>8  |
| Neurology                         | 999.0<br>5  | 1205.<br>96 | 1116.<br>44 | 1120.<br>83 | 1135.<br>85 | 1248.<br>89 | 1273.<br>00 | 1398.<br>18 | 1824.<br>26 | 1424.<br>04 |
| Neurosurgery                      | 478.3<br>9  | 728.3<br>6  | 857.7<br>1  | 918.7<br>0  | 1363.<br>36 | 1450.<br>45 | 1033.<br>97 | 987.8<br>9  | 2043.<br>24 | 1760.<br>36 |
| Obstetrics and<br>Gynecology      | 168.4<br>0  | 129.9<br>9  | 140.4<br>4  | 118.8<br>3  | 126.5<br>0  | 113.7<br>9  | 106.8<br>0  | 136.2<br>7  | 146.9<br>8  | 231.7<br>7  |
| Ophthalmology                     | 216.4<br>9  | 212.9<br>0  | 320.0<br>6  | 305.7<br>6  | 431.9<br>8  | 356.1<br>6  | 262.6<br>0  | 341.7<br>2  | 594.1<br>6  | 580.7<br>1  |
| Orthopedics                       | 139.3<br>7  | 184.6<br>7  | 175.1<br>7  | 139.4<br>9  | 150.3<br>2  | 152.8<br>6  | 271.0<br>4  | 371.6<br>1  | 253.6<br>8  | 268.1<br>2  |
| Otolaryngology                    | 289.5<br>6  | 349.5<br>0  | 494.8<br>1  | 540.2<br>8  | 476.4<br>3  | 309.9<br>9  | 312.1<br>2  | 542.1<br>5  | 572.5<br>6  | 698.8<br>1  |
| Pathology                         | 1620.<br>52 | 1486.<br>19 | 1638.<br>03 | 2136.<br>97 | 2484.<br>83 | 2540.<br>07 | 2202.<br>75 | 1911.<br>83 | 1902.<br>49 | 2035.<br>47 |
| Pediatrics                        | 359.2<br>7  | 347.6<br>0  | 352.2<br>7  | 388.3<br>5  | 430.2<br>9  | 430.7<br>7  | 404.9<br>5  | 414.8<br>9  | 451.7<br>1  | 500.3<br>4  |
| Physical<br>Medicine &<br>Rehab   | 91.84       | 164.2<br>8  | 245.2<br>9  | 184.1<br>9  | 76.42       | 213.8<br>4  | 296.6<br>7  | 220.4<br>5  | 290.6<br>4  | 251.5<br>2  |
| Plastic Surgery                   | 0.00        | 0.00        | 0.00        | 0.00        | 0.00        | 0.00        | 0.00        | 0.00        | 0.00        | 0.00        |
| Psychiatry                        | 658.7<br>5  | 922.4<br>3  | 1025.<br>81 | 969.5<br>1  | 843.1<br>7  | 820.2<br>3  | 829.3<br>4  | 805.3<br>9  | 864.3<br>4  | 1011.<br>76 |



|                               |        |        |        |        |        |        |        |        |        |        |
|-------------------------------|--------|--------|--------|--------|--------|--------|--------|--------|--------|--------|
| Radiation-Diagnostic/Oncology | 629.93 | 620.50 | 536.98 | 620.40 | 659.97 | 612.15 | 570.57 | 445.28 | 529.63 | 601.95 |
| Surgery                       | 423.69 | 414.06 | 355.02 | 405.89 | 507.77 | 531.70 | 397.22 | 380.08 | 403.68 | 487.83 |
| Urology                       | 165.44 | 176.52 | 85.77  | 75.55  | 183.77 | 249.72 | 177.50 | 137.68 | 148.87 | 220.27 |

Supplementary Table 35: F32-grant-funding per active physician, by specialty, 2011-2020

| Specialty                  | 2011  | 2012  | 2013  | 2014   | 2015   | 2016  | 2017  | 2018   | 2019   | 2020   |
|----------------------------|-------|-------|-------|--------|--------|-------|-------|--------|--------|--------|
| Anesthesiology             | 4.78  | 7.64  | 9.74  | 7.42   | 0.57   | 1.40  | 4.10  | 6.85   | 2.88   | 9.23   |
| Dermatology                | 16.02 | 20.11 | 13.69 | 7.43   | 12.72  | 14.03 | 19.18 | 18.95  | 5.28   | 15.79  |
| Emergency Medicine         | 1.74  | 1.52  | 1.67  | 0.00   | 0.00   | 0.00  | 0.00  | 0.00   | 0.00   | 1.44   |
| Family Medicine            | 0.00  | 0.00  | 0.00  | 0.51   | 0.18   | 0.00  | 0.00  | 0.00   | 0.00   | 0.00   |
| Internal Medicine/Medicine | 60.00 | 52.73 | 52.68 | 49.24  | 51.13  | 55.89 | 53.96 | 54.60  | 55.50  | 64.07  |
| Neurology                  | 56.70 | 34.41 | 73.27 | 115.95 | 108.80 | 95.65 | 89.98 | 109.07 | 111.97 | 98.51  |
| Neurosurgery               | 83.50 | 71.52 | 65.43 | 78.52  | 94.00  | 99.01 | 95.66 | 142.17 | 76.98  | 126.36 |
| Obstetrics and Gynecology  | 5.19  | 7.15  | 4.29  | 5.23   | 6.65   | 5.51  | 3.51  | 8.43   | 7.26   | 7.12   |
| Ophthalmology              | 10.05 | 19.35 | 21.02 | 26.60  | 34.64  | 21.27 | 22.87 | 22.01  | 27.56  | 29.37  |
| Orthopedics                | 12.45 | 14.72 | 13.01 | 12.01  | 16.79  | 15.13 | 17.44 | 22.53  | 23.41  | 24.71  |
| Otolaryngology             | 57.13 | 41.39 | 38.07 | 54.29  | 31.56  | 48.85 | 62.45 | 56.16  | 51.10  | 44.43  |

|                                       |           |           |           |       |       |            |           |       |       |       |
|---------------------------------------|-----------|-----------|-----------|-------|-------|------------|-----------|-------|-------|-------|
| Pathology                             | 76.2<br>1 | 60.3<br>1 | 69.6<br>6 | 75.78 | 90.87 | 104.7<br>6 | 69.5<br>0 | 82.55 | 77.49 | 57.40 |
| Pediatrics                            | 24.1<br>2 | 25.3<br>3 | 22.1<br>5 | 21.59 | 15.07 | 13.34      | 12.6<br>1 | 12.81 | 19.10 | 11.01 |
| Physical Medicine<br>& Rehab          | 6.04      | 5.95      | 0.00      | 6.20  | 4.45  | 7.45       | 20.1<br>5 | 25.75 | 20.18 | 14.01 |
| Plastic Surgery                       | 0.00      | 0.00      | 0.00      | 0.00  | 0.00  | 0.00       | 0.00      | 0.00  | 9.64  | 0.00  |
| Psychiatry                            | 50.1<br>7 | 36.8<br>2 | 35.3<br>4 | 33.44 | 37.73 | 41.09      | 30.8<br>3 | 35.99 | 43.81 | 52.11 |
| Radiation-<br>Diagnostic/Oncolo<br>gy | 21.8<br>2 | 11.3<br>8 | 4.91      | 1.44  | 2.89  | 12.18      | 9.61      | 10.57 | 6.52  | 11.04 |
| Surgery                               | 31.5<br>8 | 29.5<br>1 | 26.2<br>8 | 38.96 | 45.51 | 40.85      | 37.6<br>0 | 50.79 | 39.44 | 42.67 |
| Urology                               | 11.8<br>5 | 10.8<br>3 | 11.3<br>9 | 22.73 | 12.31 | 15.78      | 11.9<br>2 | 7.36  | 6.43  | 7.88  |

Supplementary Table 36: T32-grant-funding per active physician, by specialty, 2011-2020

| Specialty                         | 2011        | 2012        | 2013        | 2014       | 2015        | 2016        | 2017        | 2018        | 2019        | 2020        |
|-----------------------------------|-------------|-------------|-------------|------------|-------------|-------------|-------------|-------------|-------------|-------------|
| Anesthesiology                    | 57.45       | 65.31       | 66.96       | 79.36      | 116.4<br>0  | 119.5<br>2  | 128.6<br>6  | 119.9<br>2  | 120.2<br>7  | 106.3<br>8  |
| Dermatology                       | 207.6<br>1  | 220.5<br>3  | 199.1<br>2  | 159.4<br>8 | 201.5<br>2  | 198.4<br>6  | 188.1<br>6  | 177.4<br>5  | 156.3<br>6  | 162.6<br>2  |
| Emergency<br>Medicine             | 0.00        | 0.00        | 0.00        | 0.00       | 0.00        | 4.12        | 17.46       | 20.42       | 20.27       | 16.17       |
| Family<br>Medicine                | 11.59       | 10.88       | 14.03       | 13.50      | 13.54       | 11.82       | 19.34       | 15.01       | 12.46       | 14.80       |
| Internal<br>Medicine/Medi<br>cine | 1054.<br>73 | 1053.<br>63 | 1005.<br>59 | 990.1<br>5 | 1010.<br>85 | 1043.<br>62 | 1038.<br>99 | 1125.<br>69 | 1119.<br>66 | 1158.<br>87 |
| Neurology                         | 738.9<br>2  | 649.1<br>1  | 632.0<br>1  | 755.6<br>2 | 672.6<br>9  | 734.8<br>4  | 787.5<br>0  | 809.4<br>2  | 642.7<br>0  | 814.6<br>6  |
| Neurosurgery                      | 117.2<br>1  | 104.0<br>3  | 112.5<br>2  | 114.0<br>8 | 325.3<br>0  | 334.6<br>2  | 297.2<br>0  | 403.1<br>2  | 638.7<br>8  | 697.7<br>0  |

|                               |         |         |         |         |         |         |         |         |         |         |
|-------------------------------|---------|---------|---------|---------|---------|---------|---------|---------|---------|---------|
| Obstetrics and Gynecology     | 59.25   | 58.68   | 61.87   | 63.72   | 64.74   | 58.75   | 51.70   | 39.48   | 41.24   | 67.03   |
| Ophthalmology                 | 160.46  | 175.12  | 242.27  | 237.86  | 215.42  | 206.22  | 199.95  | 213.17  | 252.12  | 246.06  |
| Orthopedics                   | 88.32   | 106.23  | 94.12   | 83.97   | 88.05   | 87.90   | 96.42   | 82.36   | 87.83   | 108.73  |
| Otolaryngology                | 268.30  | 359.98  | 305.44  | 392.08  | 420.92  | 397.90  | 455.84  | 453.01  | 438.15  | 494.20  |
| Pathology                     | 2186.81 | 2035.57 | 1914.38 | 1993.36 | 1842.40 | 1841.23 | 1952.68 | 1936.68 | 1803.78 | 1596.10 |
| Pediatrics                    | 440.82  | 429.56  | 402.71  | 380.54  | 425.45  | 423.31  | 375.23  | 407.32  | 413.19  | 425.38  |
| Physical Medicine & Rehab     | 168.31  | 122.68  | 122.60  | 93.41   | 102.48  | 108.48  | 113.81  | 134.73  | 129.29  | 164.28  |
| Plastic Surgery               | 0.00    | 0.00    | 0.00    | 0.00    | 0.00    | 0.00    | 0.00    | 0.00    | 0.00    | 0.00    |
| Psychiatry                    | 523.79  | 546.74  | 544.91  | 509.45  | 480.55  | 534.91  | 553.12  | 559.63  | 585.23  | 672.18  |
| Radiation-Diagnostic/Oncology | 171.95  | 116.67  | 123.22  | 127.95  | 141.77  | 183.69  | 150.70  | 192.13  | 188.18  | 160.75  |
| Surgery                       | 479.19  | 476.61  | 446.78  | 428.48  | 415.80  | 490.17  | 527.02  | 632.80  | 698.75  | 643.16  |
| Urology                       | 110.36  | 124.87  | 117.82  | 119.16  | 66.07   | 91.89   | 62.83   | 33.26   | 96.93   | 113.31  |

Supplementary Table 37: K01-grant-funding per active physician, by specialty, 2011-2020

| Specialty      | 2011  | 2012  | 2013  | 2014  | 2015  | 2016  | 2017   | 2018   | 2019  | 2020  |
|----------------|-------|-------|-------|-------|-------|-------|--------|--------|-------|-------|
| Anesthesiology | 11.97 | 11.98 | 11.36 | 14.94 | 21.38 | 21.37 | 24.69  | 28.77  | 15.50 | 23.43 |
| Dermatology    | 34.67 | 42.10 | 52.45 | 38.57 | 55.29 | 65.58 | 106.25 | 109.18 | 82.28 | 75.10 |

|                               |        |        |        |        |        |        |        |        |        |        |
|-------------------------------|--------|--------|--------|--------|--------|--------|--------|--------|--------|--------|
| Emergency Medicine            | 0.00   | 3.83   | 3.60   | 3.44   | 6.97   | 0.00   | 0.00   | 0.93   | 2.73   | 5.47   |
| Family Medicine               | 11.65  | 14.49  | 10.85  | 8.14   | 8.35   | 9.53   | 9.57   | 11.03  | 9.88   | 17.62  |
| Internal Medicine/Medicine    | 152.01 | 139.88 | 140.59 | 166.31 | 180.19 | 165.29 | 168.51 | 186.80 | 202.76 | 206.13 |
| Neurology                     | 125.34 | 139.07 | 175.80 | 192.43 | 186.72 | 207.22 | 199.33 | 189.16 | 210.88 | 165.72 |
| Neurosurgery                  | 59.06  | 47.18  | 24.49  | 0.00   | 0.00   | 19.26  | 0.00   | 56.31  | 78.98  | 57.08  |
| Obstetrics and Gynecology     | 6.92   | 4.21   | 7.66   | 15.55  | 18.77  | 17.85  | 22.88  | 18.27  | 23.96  | 26.07  |
| Ophthalmology                 | 0.00   | 0.00   | 0.00   | 7.10   | 0.00   | 0.00   | 7.72   | 13.28  | 13.46  | 7.52   |
| Orthopedics                   | 31.17  | 24.07  | 41.73  | 44.16  | 57.72  | 46.40  | 39.47  | 32.31  | 36.72  | 30.81  |
| Otolaryngology                | 29.72  | 29.58  | 29.44  | 27.75  | 0.00   | 0.00   | 0.00   | 0.00   | 0.00   | 13.27  |
| Pathology                     | 102.72 | 114.00 | 123.82 | 111.14 | 113.43 | 153.99 | 164.00 | 185.13 | 163.88 | 218.65 |
| Pediatrics                    | 44.76  | 38.30  | 40.61  | 43.32  | 37.79  | 53.22  | 54.02  | 51.33  | 56.95  | 59.26  |
| Physical Medicine & Rehab     | 40.44  | 41.98  | 54.95  | 81.08  | 94.27  | 107.23 | 180.41 | 174.18 | 136.74 | 154.63 |
| Plastic Surgery               | 0.00   | 0.00   | 0.00   | 0.00   | 0.00   | 0.00   | 0.00   | 0.00   | 0.00   | 0.00   |
| Psychiatry                    | 314.48 | 321.51 | 296.05 | 304.76 | 284.39 | 268.10 | 274.19 | 264.67 | 286.16 | 314.98 |
| Radiation-Diagnostic/Oncology | 64.43  | 55.86  | 40.20  | 41.23  | 44.27  | 49.16  | 67.88  | 60.06  | 46.75  | 36.61  |
| Surgery                       | 37.96  | 33.43  | 49.24  | 35.12  | 53.59  | 68.22  | 83.10  | 62.83  | 53.73  | 39.57  |
| Urology                       | 10.77  | 10.80  | 10.83  | 14.04  | 44.88  | 60.18  | 85.28  | 69.62  | 68.52  | 85.16  |

Supplementary Table 38: K08-grant-funding per active physician, by specialty, 2011-2020

| Specialty                  | 2011   | 2012   | 2013   | 2014   | 2015   | 2016   | 2017   | 2018   | 2019   | 2020   |
|----------------------------|--------|--------|--------|--------|--------|--------|--------|--------|--------|--------|
| Anesthesiology             | 40.78  | 45.27  | 50.82  | 55.42  | 51.27  | 49.53  | 63.75  | 90.26  | 106.84 | 94.17  |
| Dermatology                | 205.68 | 208.13 | 170.54 | 150.23 | 153.90 | 162.85 | 162.50 | 146.67 | 161.06 | 130.13 |
| Emergency Medicine         | 8.33   | 15.95  | 23.50  | 15.43  | 18.84  | 26.64  | 26.82  | 29.34  | 24.63  | 24.80  |
| Family Medicine            | 5.73   | 5.72   | 6.22   | 2.50   | 1.33   | 1.30   | 1.48   | 1.45   | 4.35   | 4.26   |
| Internal Medicine/Medicine | 344.14 | 330.28 | 299.67 | 304.18 | 280.67 | 323.79 | 324.02 | 352.97 | 387.86 | 392.13 |
| Neurology                  | 490.32 | 443.51 | 500.72 | 436.15 | 433.34 | 399.55 | 414.33 | 408.50 | 461.26 | 522.45 |
| Neurosurgery               | 229.79 | 234.21 | 279.63 | 219.26 | 310.07 | 343.34 | 401.77 | 356.15 | 412.35 | 314.03 |
| Obstetrics and Gynecology  | 26.56  | 26.52  | 23.33  | 14.54  | 5.88   | 8.99   | 8.01   | 21.51  | 25.98  | 39.20  |
| Ophthalmology              | 273.33 | 279.28 | 291.34 | 334.57 | 328.66 | 290.54 | 292.39 | 276.97 | 261.70 | 252.56 |
| Orthopedics                | 9.04   | 13.71  | 26.79  | 22.73  | 25.33  | 45.65  | 63.20  | 54.19  | 44.41  | 51.90  |
| Otolaryngology             | 216.07 | 235.99 | 227.68 | 195.77 | 240.71 | 218.56 | 176.78 | 200.32 | 221.60 | 192.27 |
| Pathology                  | 324.60 | 298.86 | 333.48 | 359.99 | 343.54 | 300.77 | 296.19 | 367.42 | 373.30 | 413.28 |
| Pediatrics                 | 270.48 | 236.56 | 230.35 | 217.43 | 202.81 | 231.42 | 293.33 | 328.39 | 319.98 | 309.69 |
| Physical Medicine & Rehab  | 14.69  | 14.35  | 14.03  | 0.00   | 0.00   | 0.00   | 0.00   | 17.91  | 17.51  | 17.58  |
| Plastic Surgery            | 0.00   | 0.00   | 0.00   | 0.00   | 0.00   | 0.00   | 0.00   | 0.00   | 0.00   | 0.00   |
| Psychiatry                 | 148.44 | 132.90 | 88.13  | 119.99 | 98.17  | 102.58 | 111.62 | 96.05  | 83.94  | 109.84 |

|                               |        |        |        |        |        |        |        |        |        |        |
|-------------------------------|--------|--------|--------|--------|--------|--------|--------|--------|--------|--------|
| Radiation-Diagnostic/Oncology | 25.01  | 23.36  | 21.72  | 23.96  | 21.53  | 4.38   | 13.36  | 15.04  | 69.92  | 90.98  |
| Surgery                       | 300.38 | 312.41 | 264.84 | 260.59 | 214.63 | 243.63 | 253.30 | 289.80 | 299.40 | 325.49 |
| Urology                       | 123.84 | 122.20 | 142.34 | 108.32 | 67.48  | 83.58  | 85.01  | 82.50  | 108.92 | 107.64 |

Supplementary Table 39: K23-grant-funding per active physician, by specialty, 2011-2020

| Specialty                  | 2011   | 2012   | 2013   | 2014   | 2015   | 2016   | 2017   | 2018   | 2019   | 2020   |
|----------------------------|--------|--------|--------|--------|--------|--------|--------|--------|--------|--------|
| Anesthesiology             | 29.91  | 38.53  | 45.12  | 49.58  | 44.81  | 37.01  | 53.81  | 51.26  | 72.70  | 70.44  |
| Dermatology                | 33.98  | 44.24  | 22.18  | 10.66  | 21.97  | 56.29  | 57.57  | 111.06 | 124.41 | 107.01 |
| Emergency Medicine         | 68.98  | 59.28  | 62.06  | 56.18  | 55.92  | 75.99  | 88.16  | 76.13  | 79.18  | 57.31  |
| Family Medicine            | 13.02  | 11.66  | 8.27   | 3.99   | 5.82   | 5.20   | 7.11   | 6.91   | 8.33   | 9.31   |
| Internal Medicine/Medicine | 407.03 | 419.60 | 411.26 | 391.56 | 355.75 | 377.87 | 374.26 | 374.05 | 374.07 | 418.03 |
| Neurology                  | 696.50 | 687.37 | 591.24 | 631.47 | 644.54 | 518.67 | 638.91 | 670.83 | 728.21 | 744.63 |
| Neurosurgery               | 73.70  | 139.35 | 178.37 | 132.14 | 157.06 | 133.72 | 132.76 | 130.34 | 161.29 | 195.31 |
| Obstetrics and Gynecology  | 39.68  | 44.49  | 33.98  | 41.18  | 27.96  | 15.59  | 27.45  | 32.06  | 40.59  | 47.61  |
| Ophthalmology              | 159.02 | 129.45 | 144.34 | 121.28 | 144.82 | 217.56 | 242.46 | 212.90 | 233.70 | 219.24 |
| Orthopedics                | 17.02  | 19.94  | 16.53  | 16.51  | 10.16  | 18.17  | 9.12   | 19.40  | 25.89  | 28.72  |
| Otolaryngology             | 160.86 | 134.92 | 132.49 | 203.04 | 276.16 | 226.42 | 255.43 | 251.86 | 234.92 | 186.50 |
| Pathology                  | 34.49  | 27.91  | 19.31  | 30.02  | 20.86  | 10.49  | 11.37  | 11.18  | 15.03  | 41.74  |

|                                       |            |            |            |            |            |            |            |            |            |            |
|---------------------------------------|------------|------------|------------|------------|------------|------------|------------|------------|------------|------------|
| Pediatrics                            | 233.2<br>9 | 228.0<br>2 | 218.6<br>4 | 212.8<br>6 | 190.7<br>1 | 176.8<br>0 | 254.6<br>9 | 275.1<br>3 | 310.5<br>6 | 367.6<br>0 |
| Physical<br>Medicine &<br>Rehab       | 116.9<br>2 | 108.3<br>1 | 169.6<br>8 | 181.3<br>3 | 142.3<br>9 | 133.0<br>4 | 106.1<br>9 | 28.27      | 46.51      | 45.29      |
| Plastic Surgery                       | 0.00       | 0.00       | 0.00       | 0.00       | 0.00       | 0.00       | 0.00       | 0.00       | 0.00       | 0.00       |
| Psychiatry                            | 498.0<br>0 | 481.6<br>6 | 451.5<br>5 | 429.5<br>6 | 414.6<br>4 | 403.4<br>3 | 473.3<br>4 | 465.2<br>1 | 498.7<br>9 | 506.3<br>5 |
| Radiation-<br>Diagnostic/Oncol<br>ogy | 29.33      | 18.78      | 16.73      | 17.03      | 16.74      | 17.70      | 18.13      | 8.86       | 4.74       | 13.99      |
| Surgery                               | 64.76      | 64.88      | 58.74      | 62.32      | 58.19      | 77.12      | 64.29      | 57.90      | 60.88      | 87.85      |
| Urology                               | 31.99      | 15.71      | 30.39      | 47.54      | 30.71      | 44.21      | 31.45      | 14.34      | 49.54      | 49.35      |

Supplementary Table 40: U01-grant-funding per active physician, by specialty, 2011-2020

| Specialty                         | 2011        | 2012        | 2013        | 2014        | 2015        | 2016        | 2017        | 2018        | 2019        | 2020        |
|-----------------------------------|-------------|-------------|-------------|-------------|-------------|-------------|-------------|-------------|-------------|-------------|
| Anesthesiology                    | 82.34       | 78.08       | 86.27       | 169.9<br>1  | 143.5<br>5  | 290.8<br>4  | 216.7<br>8  | 199.3<br>1  | 270.3<br>4  | 242.6<br>6  |
| Dermatology                       | 74.83       | 225.9<br>5  | 216.3<br>1  | 194.1<br>0  | 348.6<br>7  | 231.4<br>5  | 264.0<br>7  | 290.0<br>1  | 653.2<br>5  | 420.9<br>0  |
| Emergency<br>Medicine             | 536.8<br>1  | 473.8<br>5  | 220.3<br>1  | 182.8<br>0  | 111.4<br>1  | 80.69       | 152.4<br>0  | 577.1<br>0  | 43.66       | 316.0<br>1  |
| Family<br>Medicine                | 49.45       | 76.23       | 81.82       | 89.31       | 106.2<br>9  | 85.84       | 55.19       | 76.33       | 84.37       | 68.42       |
| Internal<br>Medicine/Medi<br>cine | 3621.<br>03 | 3495.<br>78 | 3850.<br>67 | 3696.<br>26 | 3241.<br>76 | 3097.<br>05 | 3393.<br>64 | 3568.<br>23 | 5128.<br>75 | 5808.<br>65 |
| Neurology                         | 4780.<br>51 | 5279.<br>12 | 5436.<br>02 | 5968.<br>05 | 4829.<br>93 | 6481.<br>36 | 5132.<br>20 | 8026.<br>10 | 7273.<br>08 | 9843.<br>68 |
| Neurosurgery                      | 913.4<br>2  | 899.2<br>9  | 3027.<br>48 | 2859.<br>72 | 2140.<br>20 | 4737.<br>37 | 4929.<br>55 | 2461.<br>91 | 1190.<br>18 | 972.8<br>7  |

|                               |             |             |             |             |             |             |             |             |             |             |
|-------------------------------|-------------|-------------|-------------|-------------|-------------|-------------|-------------|-------------|-------------|-------------|
| Obstetrics and Gynecology     | 629.1<br>1  | 419.9<br>6  | 127.7<br>6  | 267.5<br>4  | 1143.<br>03 | 234.5<br>2  | 211.0<br>1  | 291.2<br>4  | 188.1<br>4  | 198.1<br>6  |
| Ophthalmology                 | 130.7<br>7  | 135.1<br>6  | 105.7<br>6  | 73.45       | 159.5<br>9  | 199.2<br>7  | 205.9<br>6  | 323.0<br>0  | 352.5<br>7  | 411.2<br>0  |
| Orthopedics                   | 0.00        | 0.00        | 26.92       | 34.13       | 10.27       | 10.31       | 0.00        | 0.00        | 36.97       | 34.00       |
| Otolaryngology                | 153.0<br>2  | 89.48       | 122.5<br>0  | 112.0<br>1  | 277.4<br>7  | 253.3<br>6  | 304.5<br>7  | 417.2<br>8  | 220.0<br>1  | 318.1<br>2  |
| Pathology                     | 3022.<br>50 | 2069.<br>40 | 1985.<br>57 | 1456.<br>02 | 1478.<br>29 | 1902.<br>17 | 2107.<br>76 | 2552.<br>67 | 2365.<br>47 | 2545.<br>45 |
| Pediatrics                    | 1766.<br>44 | 1777.<br>68 | 1619.<br>25 | 1776.<br>41 | 1633.<br>86 | 1466.<br>35 | 1454.<br>22 | 1477.<br>21 | 1365.<br>27 | 1218.<br>99 |
| Physical Medicine & Rehab     | 66.88       | 71.50       | 426.5<br>3  | 385.6<br>4  | 424.5<br>9  | 391.4<br>9  | 382.6<br>0  | 203.0<br>0  | 520.2<br>3  | 799.2<br>4  |
| Plastic Surgery               | 0.00        | 0.00        | 0.00        | 0.00        | 0.00        | 0.00        | 0.00        | 59.53       | 58.82       | 58.82       |
| Psychiatry                    | 1085.<br>13 | 1553.<br>90 | 1433.<br>67 | 1624.<br>39 | 1785.<br>65 | 1563.<br>86 | 1344.<br>58 | 1522.<br>54 | 2389.<br>77 | 2034.<br>94 |
| Radiation-Diagnostic/Oncology | 204.3<br>3  | 244.9<br>6  | 367.5<br>1  | 449.2<br>9  | 506.2<br>6  | 441.8<br>5  | 881.2<br>3  | 923.3<br>7  | 958.9<br>3  | 929.2<br>8  |
| Surgery                       | 1118.<br>53 | 1522.<br>26 | 1540.<br>99 | 1359.<br>58 | 1590.<br>53 | 1420.<br>41 | 1271.<br>76 | 1548.<br>58 | 1571.<br>38 | 1279.<br>99 |
| Urology                       | 1369.<br>09 | 1157.<br>66 | 1208.<br>71 | 790.0<br>8  | 667.8<br>7  | 736.4<br>7  | 770.2<br>3  | 687.6<br>1  | 1040.<br>73 | 505.6<br>6  |

Supplementary Table 41: P30-grant-funding per active physician, by specialty, 2011-2020

| Specialty          | 2011       | 2012       | 2013       | 2014       | 2015       | 2016       | 2017       | 2018       | 2019       | 2020       |
|--------------------|------------|------------|------------|------------|------------|------------|------------|------------|------------|------------|
| Anesthesiology     | 0.00       | 0.00       | 0.00       | 24.35      | 0.00       | 0.00       | 0.00       | 0.00       | 0.00       | 0.00       |
| Dermatology        | 517.2<br>7 | 390.8<br>5 | 532.9<br>7 | 597.2<br>4 | 553.4<br>5 | 625.5<br>8 | 543.2<br>6 | 268.0<br>0 | 247.8<br>2 | 248.3<br>8 |
| Emergency Medicine | 0.00       | 0.00       | 0.00       | 0.00       | 0.00       | 0.00       | 0.00       | 0.00       | 0.00       | 0.00       |



|                               |         |         |         |         |         |         |         |         |         |         |
|-------------------------------|---------|---------|---------|---------|---------|---------|---------|---------|---------|---------|
| Family Medicine               | 0.00    | 4.46    | 4.35    | 4.32    | 4.27    | 4.23    | 13.21   | 14.08   | 17.13   | 19.61   |
| Internal Medicine/Medicine    | 2716.56 | 2911.97 | 3057.10 | 3514.81 | 3147.97 | 3230.52 | 3307.98 | 3315.39 | 3776.81 | 4086.91 |
| Neurology                     | 1056.37 | 1155.52 | 1063.99 | 976.67  | 998.45  | 1076.64 | 1065.60 | 1194.65 | 1491.94 | 3464.85 |
| Neurosurgery                  | 374.49  | 518.96  | 483.66  | 340.21  | 327.09  | 117.33  | 113.03  | 108.60  | 121.46  | 0.00    |
| Obstetrics and Gynecology     | 143.68  | 142.88  | 126.34  | 130.71  | 139.49  | 138.61  | 0.00    | 58.71   | 68.05   | 121.03  |
| Ophthalmology                 | 1044.94 | 1191.91 | 962.15  | 936.54  | 896.10  | 838.56  | 834.51  | 920.85  | 910.75  | 891.43  |
| Orthopedics                   | 126.20  | 128.06  | 123.40  | 159.49  | 159.80  | 184.41  | 183.39  | 181.70  | 237.86  | 236.51  |
| Otolaryngology                | 539.17  | 520.92  | 493.72  | 475.65  | 318.33  | 242.09  | 64.56   | 569.30  | 524.67  | 785.66  |
| Pathology                     | 1669.05 | 1201.52 | 2648.08 | 2685.00 | 2537.14 | 3274.77 | 2774.65 | 1105.85 | 1017.01 | 1295.16 |
| Pediatrics                    | 473.59  | 415.55  | 395.36  | 299.96  | 295.02  | 257.04  | 245.91  | 183.70  | 192.70  | 283.01  |
| Physical Medicine & Rehab     | 0.00    | 0.00    | 0.00    | 0.00    | 0.00    | 0.00    | 0.00    | 0.00    | 0.00    | 0.00    |
| Plastic Surgery               | 0.00    | 0.00    | 0.00    | 0.00    | 0.00    | 0.00    | 0.00    | 0.00    | 0.00    | 0.00    |
| Psychiatry                    | 461.43  | 454.04  | 523.37  | 431.27  | 485.37  | 354.58  | 305.35  | 248.26  | 224.58  | 251.57  |
| Radiation-Diagnostic/Oncology | 87.87   | 107.87  | 113.69  | 155.26  | 306.04  | 173.72  | 222.79  | 212.66  | 273.83  | 312.30  |
| Surgery                       | 959.11  | 834.32  | 964.72  | 633.35  | 1001.65 | 1008.56 | 1502.64 | 1353.30 | 1166.66 | 1671.84 |
| Urology                       | 492.04  | 482.37  | 403.34  | 541.80  | 544.71  | 641.88  | 0.00    | 0.00    | 0.00    | 0.00    |

Supplementary Table 42: Mean (standard deviation) R01-grant-funding-amount, by specialty.

2011-2020

| Specialty                      | 2011           | 2012           | 2013           | 2014           | 2015           | 2016           | 2017           | 2018           | 2019           | 2020           |
|--------------------------------|----------------|----------------|----------------|----------------|----------------|----------------|----------------|----------------|----------------|----------------|
| Anesthesiology                 | 374,4<br>47.70 | 394,1<br>00.80 | 381,4<br>65.50 | 388,3<br>18.40 | 397,8<br>22.70 | 406,7<br>01.40 | 407,5<br>69.50 | 421,2<br>65.70 | 442,3<br>63.80 | 457,5<br>45.10 |
| Dermatology                    | 346,2<br>69.00 | 353,8<br>75.30 | 329,7<br>60.60 | 339,4<br>97.10 | 343,1<br>33.50 | 378,6<br>46.10 | 376,1<br>41.70 | 401,9<br>37.20 | 407,3<br>64.50 | 451,6<br>37.40 |
| Emergency Medicine             | 466,0<br>96.40 | 430,1<br>06.60 | 460,0<br>62.20 | 470,2<br>84.20 | 426,3<br>57.60 | 487,5<br>72.10 | 508,4<br>76.20 | 493,7<br>67.40 | 575,2<br>32.50 | 549,0<br>43.00 |
| Family Medicine                | 487,5<br>46.90 | 488,2<br>25.60 | 486,0<br>72.70 | 495,9<br>50.50 | 506,2<br>53.30 | 545,2<br>24.90 | 554,9<br>83.50 | 600,9<br>27.30 | 516,8<br>41.30 | 531,2<br>60.10 |
| Internal Medicine/<br>Medicine | 397,3<br>04.00 | 402,0<br>09.00 | 394,3<br>28.30 | 418,4<br>06.80 | 425,0<br>24.90 | 444,2<br>84.30 | 460,8<br>66.00 | 476,9<br>68.20 | 496,1<br>73.70 | 519,1<br>20.80 |
| Neurology                      | 410,2<br>36.30 | 402,8<br>97.10 | 396,8<br>17.20 | 416,2<br>05.80 | 415,8<br>76.30 | 454,9<br>82.50 | 501,7<br>19.70 | 527,2<br>46.30 | 523,7<br>79.60 | 591,8<br>15.60 |
| Neurosurgery                   | 349,1<br>90.00 | 361,2<br>19.40 | 334,9<br>60.60 | 363,6<br>22.60 | 380,3<br>44.00 | 392,8<br>76.40 | 396,9<br>33.90 | 405,7<br>69.40 | 419,0<br>80.50 | 439,3<br>43.10 |
| Obstetrics and<br>Gynecology   | 346,0<br>00.80 | 353,6<br>12.00 | 344,7<br>03.60 | 366,5<br>29.30 | 395,0<br>03.60 | 414,1<br>15.00 | 426,2<br>31.40 | 462,3<br>69.60 | 470,1<br>95.60 | 498,9<br>58.80 |
| Ophthalmology                  | 422,2<br>26.60 | 405,3<br>62.00 | 408,7<br>34.00 | 420,9<br>05.30 | 413,0<br>73.10 | 423,6<br>10.60 | 413,5<br>86.50 | 415,6<br>60.80 | 427,3<br>74.40 | 424,9<br>00.50 |
| Orthopedics                    | 339,0<br>55.70 | 342,5<br>96.00 | 328,7<br>92.10 | 358,6<br>00.80 | 347,8<br>68.40 | 359,8<br>13.70 | 376,5<br>07.60 | 393,6<br>33.10 | 400,1<br>86.80 | 394,0<br>73.30 |
| Otolaryngology                 | 366,1<br>40.90 | 374,5<br>85.90 | 354,1<br>34.70 | 370,3<br>05.90 | 386,7<br>24.90 | 405,4<br>42.80 | 444,4<br>03.50 | 441,6<br>87.90 | 468,1<br>07.80 | 484,7<br>53.40 |
| Pathology                      | 349,3<br>28.10 | 361,4<br>02.70 | 346,1<br>62.30 | 361,4<br>13.00 | 377,6<br>71.50 | 394,8<br>93.70 | 419,3<br>94.60 | 430,8<br>87.60 | 438,1<br>69.00 | 450,2<br>44.80 |
| Pediatrics                     | 406,3<br>39.10 | 418,6<br>46.40 | 401,0<br>10.10 | 423,2<br>25.40 | 439,2<br>47.30 | 436,4<br>98.90 | 440,8<br>01.40 | 452,5<br>63.40 | 469,5<br>64.00 | 498,0<br>26.20 |

|                                       |                |                |                |                |                |                |                |                |                |                |
|---------------------------------------|----------------|----------------|----------------|----------------|----------------|----------------|----------------|----------------|----------------|----------------|
| Physical<br>Medicine &<br>Rehab       | 362,8<br>21.50 | 373,5<br>96.10 | 400,0<br>98.60 | 407,7<br>91.90 | 402,0<br>30.10 | 417,5<br>19.40 | 469,7<br>98.90 | 450,8<br>26.50 | 466,4<br>02.00 | 512,5<br>84.80 |
| Plastic<br>Surgery                    | 322,3<br>74.70 | NaN            | 537,4<br>02.00 | 301,7<br>65.00 | NaN            | NaN            | 333,2<br>50.00 | NaN            | 283,8<br>22.00 | NaN            |
| Psychiatry                            | 465,5<br>97.40 | 463,9<br>81.70 | 449,1<br>74.00 | 468,7<br>94.70 | 487,5<br>65.50 | 510,2<br>25.30 | 526,1<br>23.20 | 549,5<br>94.60 | 565,5<br>33.20 | 585,7<br>39.30 |
| Radiation-<br>Diagnostic/<br>Oncology | 388,7<br>20.60 | 403,8<br>69.50 | 385,4<br>50.80 | 406,7<br>17.20 | 420,6<br>50.40 | 463,2<br>76.00 | 488,2<br>75.40 | 483,9<br>62.90 | 505,3<br>59.40 | 503,9<br>52.00 |
| Surgery                               | 355,1<br>71.00 | 359,4<br>83.10 | 345,3<br>14.60 | 374,7<br>95.10 | 396,7<br>34.30 | 414,8<br>11.60 | 424,3<br>01.40 | 429,0<br>44.80 | 450,7<br>05.20 | 469,1<br>53.20 |
| Urology                               | 307,8<br>52.70 | 326,0<br>01.30 | 301,4<br>58.50 | 305,8<br>33.90 | 344,4<br>87.90 | 343,3<br>86.80 | 380,9<br>88.50 | 402,4<br>71.80 | 412,2<br>44.80 | 422,4<br>29.80 |

Supplementary Table 43: Mean (standard deviation) R03-grant-funding-amount, by specialty,

2011-2020

| Specialty                         | 2011          | 2012          | 2013          | 2014           | 2015           | 2016           | 2017          | 2018          | 2019           | 2020           |
|-----------------------------------|---------------|---------------|---------------|----------------|----------------|----------------|---------------|---------------|----------------|----------------|
| Anesthesiol<br>ogy                | 75,01<br>3.50 | 80,12<br>1.33 | 73,82<br>7.00 | 88,80<br>9.17  | 80,64<br>3.50  | 77,05<br>3.25  | 64,44<br>4.67 | 84,86<br>1.11 | 99,03<br>5.62  | 125,4<br>95.20 |
| Dermatolog<br>y                   | 65,17<br>9.20 | 69,33<br>1.67 | 75,55<br>7.50 | 79,53<br>6.50  | 78,73<br>9.62  | 78,29<br>8.56  | 76,54<br>1.71 | 77,56<br>2.50 | 97,48<br>4.25  | 103,0<br>84.00 |
| Emergency<br>Medicine             | 63,90<br>5.00 | 86,34<br>2.00 | 68,64<br>3.00 | 114,0<br>00.00 | 103,8<br>27.20 | 103,8<br>72.80 | 90,32<br>2.40 | 87,72<br>3.75 | 97,37<br>5.00  | 86,32<br>9.25  |
| Family<br>Medicine                | 92,10<br>4.25 | 79,95<br>3.11 | 93,96<br>3.44 | 72,56<br>6.71  | 71,56<br>9.67  | 81,50<br>0.40  | 77,79<br>1.50 | 89,62<br>5.00 | 110,5<br>13.00 | 137,6<br>48.00 |
| Internal<br>Medicine/<br>Medicine | 80,46<br>4.41 | 83,14<br>9.58 | 81,05<br>8.10 | 86,72<br>1.70  | 88,12<br>9.27  | 87,86<br>2.07  | 86,18<br>4.46 | 83,94<br>5.14 | 95,11<br>6.11  | 107,6<br>53.50 |

|                                       |                |                |                |                |                |                |                |                |                |                |
|---------------------------------------|----------------|----------------|----------------|----------------|----------------|----------------|----------------|----------------|----------------|----------------|
| Neurology                             | 96,46<br>0.50  | 72,98<br>6.11  | 77,80<br>6.82  | 87,61<br>4.08  | 96,73<br>4.08  | 105,5<br>22.80 | 92,07<br>3.53  | 79,03<br>1.53  | 102,4<br>01.90 | 112,4<br>59.50 |
| Neurosurge<br>ry                      | 130,4<br>34.70 | 97,59<br>0.25  | 95,98<br>5.62  | 77,37<br>9.40  | 84,82<br>5.57  | 89,40<br>3.75  | 80,90<br>0.00  | 80,53<br>9.50  | 80,12<br>5.00  | 94,24<br>3.00  |
| Obstetrics<br>and<br>Gynecology       | 75,10<br>7.75  | 72,01<br>9.92  | 76,44<br>2.40  | 66,96<br>6.33  | 74,64<br>8.30  | 91,24<br>5.82  | 88,74<br>7.40  | 81,76<br>9.53  | 80,32<br>4.57  | 76,46<br>6.70  |
| Ophthalmol<br>ogy                     | NaN            | NaN            | NaN            | 97,81<br>2.50  | 90,41<br>2.67  | 81,00<br>0.00  | 117,7<br>50.00 | 97,00<br>0.00  | 107,4<br>91.00 | 109,9<br>85.70 |
| Orthopedics                           | 81,66<br>7.80  | 78,73<br>6.50  | 73,07<br>1.33  | 84,99<br>2.50  | 81,80<br>1.70  | 71,47<br>0.57  | 77,29<br>8.33  | 119,8<br>74.70 | 105,5<br>83.60 | 90,42<br>0.00  |
| Otolaryngol<br>ogy                    | 132,1<br>87.70 | 126,2<br>41.40 | 125,2<br>50.60 | 131,2<br>34.80 | 134,7<br>09.60 | 140,3<br>82.80 | 149,7<br>60.80 | 131,1<br>10.40 | 160,2<br>18.00 | 158,2<br>70.30 |
| Pathology                             | 77,01<br>7.92  | 68,96<br>9.52  | 68,46<br>4.14  | 72,58<br>2.80  | 82,74<br>1.27  | 81,82<br>6.56  | 86,12<br>5.00  | 85,68<br>6.81  | 93,44<br>0.08  | 108,8<br>55.80 |
| Pediatrics                            | 76,87<br>8.26  | 83,22<br>8.93  | 77,13<br>0.46  | 76,61<br>9.09  | 88,88<br>4.12  | 93,25<br>0.40  | 88,67<br>3.74  | 92,98<br>5.63  | 84,60<br>7.97  | 105,8<br>65.80 |
| Physical<br>Medicine &<br>Rehab       | 96,04<br>7.43  | 77,75<br>2.57  | 92,27<br>9.40  | 85,74<br>9.29  | 82,52<br>4.80  | 79,05<br>5.80  | 57,41<br>6.33  | 122,7<br>87.50 | 119,8<br>70.90 | 90,74<br>3.00  |
| Plastic<br>Surgery                    | NaN            | NaN            | NaN            | NaN            | NaN            | 77,00<br>0.00  | 77,62<br>5.00  | NaN            | NaN            | NaN            |
| Psychiatry                            | 106,1<br>02.80 | 96,84<br>2.21  | 88,25<br>3.77  | 108,3<br>46.70 | 105,9<br>96.80 | 97,76<br>8.48  | 91,02<br>0.66  | 92,00<br>1.78  | 94,25<br>8.75  | 112,4<br>58.60 |
| Radiation-<br>Diagnostic/<br>Oncology | 97,95<br>9.88  | 74,00<br>0.00  | 74,27<br>3.10  | 81,04<br>3.88  | 73,54<br>1.19  | 80,72<br>2.22  | 84,38<br>5.64  | 87,71<br>8.83  | 101,2<br>38.20 | 96,69<br>5.82  |
| Surgery                               | 90,94<br>6.47  | 86,95<br>2.30  | 81,03<br>8.65  | 92,01<br>0.12  | 79,18<br>7.47  | 85,13<br>1.93  | 84,61<br>4.60  | 85,82<br>2.24  | 93,10<br>0.45  | 108,7<br>86.10 |
| Urology                               | 78,00<br>0.00  | 80,20<br>6.67  | 76,72<br>7.50  | 88,90<br>1.00  | 94,22<br>9.60  | 99,95<br>1.67  | 81,00<br>0.00  | 84,75<br>0.00  | 95,08<br>3.67  | 95,64<br>0.25  |

Supplementary Table 44: Mean (standard deviation) R21-grant-funding-amount, by specialty,

2011-2020

| Specialty                       | 2011           | 2012           | 2013           | 2014           | 2015           | 2016           | 2017           | 2018           | 2019           | 2020           |
|---------------------------------|----------------|----------------|----------------|----------------|----------------|----------------|----------------|----------------|----------------|----------------|
| Anesthesiology                  | 198,6<br>26.80 | 206,6<br>45.70 | 207,9<br>25.40 | 240,3<br>74.70 | 214,8<br>90.20 | 222,6<br>42.60 | 204,0<br>33.30 | 205,6<br>08.50 | 231,8<br>93.00 | 220,0<br>26.40 |
| Dermatology                     | 183,1<br>50.90 | 215,4<br>67.50 | 205,8<br>91.90 | 187,7<br>26.20 | 175,9<br>05.80 | 206,1<br>79.00 | 206,7<br>12.70 | 200,8<br>69.70 | 211,4<br>43.40 | 215,2<br>52.90 |
| Emergency Medicine              | 236,2<br>97.20 | 247,6<br>28.80 | 225,6<br>41.70 | 226,9<br>48.40 | 176,7<br>74.30 | 171,8<br>78.60 | 150,8<br>68.10 | 170,9<br>14.20 | 266,7<br>71.70 | 245,0<br>92.00 |
| Family Medicine                 | 195,3<br>93.30 | 208,6<br>57.20 | 185,2<br>39.90 | 195,6<br>14.40 | 194,6<br>81.40 | 175,7<br>92.70 | 173,9<br>67.60 | 205,1<br>90.60 | 171,8<br>00.00 | 204,3<br>67.60 |
| Internal Medicine/<br>Medicine  | 206,7<br>11.70 | 201,9<br>68.50 | 194,6<br>21.30 | 201,2<br>98.10 | 195,9<br>91.70 | 202,2<br>11.70 | 204,1<br>70.20 | 203,7<br>08.00 | 205,4<br>22.00 | 220,5<br>45.90 |
| Neurology                       | 201,6<br>19.80 | 201,5<br>49.90 | 201,2<br>04.50 | 203,8<br>06.60 | 211,2<br>68.70 | 214,2<br>79.00 | 212,9<br>47.40 | 209,4<br>48.60 | 241,1<br>77.10 | 287,7<br>78.60 |
| Neurosurge<br>ry                | 185,7<br>24.80 | 206,7<br>32.60 | 201,6<br>00.70 | 230,0<br>48.00 | 208,2<br>43.30 | 219,1<br>18.90 | 211,8<br>09.70 | 214,2<br>77.20 | 286,4<br>52.30 | 306,6<br>22.90 |
| Obstetrics<br>and<br>Gynecology | 206,0<br>47.70 | 188,4<br>85.70 | 212,3<br>58.60 | 195,6<br>06.80 | 218,6<br>35.10 | 197,0<br>80.80 | 211,8<br>48.40 | 205,3<br>17.70 | 190,2<br>72.70 | 230,2<br>60.90 |
| Ophthalmol<br>ogy               | 184,9<br>74.60 | 203,1<br>52.80 | 195,4<br>18.10 | 194,5<br>78.50 | 223,1<br>06.90 | 195,9<br>40.80 | 205,8<br>87.20 | 210,1<br>55.00 | 224,9<br>89.80 | 215,6<br>66.20 |
| Orthopedics                     | 197,3<br>22.00 | 180,9<br>57.80 | 178,6<br>17.30 | 179,0<br>97.70 | 179,8<br>69.40 | 182,2<br>21.90 | 198,0<br>79.80 | 196,4<br>86.30 | 186,0<br>53.10 | 189,3<br>59.10 |
| Otolaryngol<br>ogy              | 190,9<br>45.80 | 202,6<br>19.80 | 219,6<br>00.80 | 180,7<br>14.10 | 194,9<br>43.90 | 209,6<br>49.70 | 198,2<br>19.80 | 168,7<br>91.10 | 186,5<br>98.10 | 207,0<br>36.90 |
| Pathology                       | 195,7<br>03.40 | 204,9<br>58.00 | 200,5<br>12.00 | 206,0<br>34.70 | 206,3<br>34.40 | 199,8<br>77.40 | 204,9<br>35.70 | 208,1<br>93.80 | 212,8<br>59.80 | 238,2<br>81.30 |
| Pediatrics                      | 191,7<br>59.30 | 204,4<br>81.70 | 194,3<br>09.80 | 204,6<br>12.00 | 204,6<br>28.20 | 203,0<br>89.60 | 203,9<br>95.10 | 209,2<br>93.80 | 215,6<br>02.60 | 229,7<br>68.60 |

|                                       |                |                |                |                |                |                |                |                |                |                |
|---------------------------------------|----------------|----------------|----------------|----------------|----------------|----------------|----------------|----------------|----------------|----------------|
| Physical<br>Medicine &<br>Rehab       | 195,2<br>26.20 | 204,2<br>76.70 | 198,5<br>93.80 | 184,9<br>09.80 | 175,0<br>84.50 | 219,8<br>59.90 | 213,2<br>17.90 | 210,6<br>36.60 | 218,3<br>63.20 | 272,9<br>56.00 |
| Plastic<br>Surgery                    | NaN            |
| Psychiatry                            | 206,7<br>45.70 | 210,0<br>05.50 | 200,3<br>07.60 | 203,1<br>95.30 | 203,9<br>61.00 | 206,2<br>54.10 | 207,0<br>92.30 | 208,0<br>95.90 | 216,3<br>18.70 | 248,4<br>06.50 |
| Radiation-<br>Diagnostic/<br>Oncology | 210,7<br>00.90 | 215,6<br>24.70 | 198,7<br>34.30 | 206,0<br>31.30 | 210,7<br>10.10 | 203,5<br>60.50 | 197,6<br>94.80 | 202,9<br>85.80 | 212,3<br>49.50 | 246,1<br>25.20 |
| Surgery                               | 192,2<br>24.20 | 197,4<br>50.10 | 194,3<br>89.40 | 213,2<br>68.20 | 206,8<br>25.20 | 196,6<br>33.60 | 198,9<br>45.20 | 196,2<br>67.10 | 202,3<br>44.50 | 230,9<br>40.30 |
| Urology                               | 203,2<br>00.80 | 192,1<br>79.90 | 167,6<br>21.00 | 184,9<br>01.50 | 180,2<br>40.60 | 189,4<br>91.20 | 195,6<br>61.90 | 197,8<br>86.00 | 189,8<br>22.10 | 224,7<br>01.10 |

Supplementary Table 45: Mean (standard deviation) F32-grant-funding-amount, by speciality,

2011-2020

| Specialty                         | 2011          | 2012          | 2013          | 2014          | 2015          | 2016          | 2017          | 2018          | 2019          | 2020          |
|-----------------------------------|---------------|---------------|---------------|---------------|---------------|---------------|---------------|---------------|---------------|---------------|
| Anesthesiology                    | 47,91<br>4.25 | 51,49<br>0.00 | 49,63<br>3.25 | 43,53<br>4.29 | 23,74<br>1.00 | 58,00<br>2.00 | 57,06<br>6.00 | 57,56<br>0.40 | 60,91<br>8.00 | 64,99<br>0.00 |
| Dermatology                       | 43,34<br>3.50 | 55,75<br>4.00 | 51,85<br>7.67 | 42,83<br>6.00 | 49,62<br>8.00 | 55,55<br>4.00 | 46,23<br>8.00 | 58,17<br>9.75 | 66,11<br>0.00 | 65,89<br>4.00 |
| Emergency<br>Medicine             | 59,23<br>4.00 | 54,03<br>3.00 | 62,23<br>4.00 | NaN           | NaN           | NaN           | NaN           | NaN           | NaN           | 65,31<br>0.00 |
| Family<br>Medicine                | NaN           | NaN           | NaN           | 56,03<br>0.00 | 20,30<br>7.00 | NaN           | NaN           | NaN           | NaN           | NaN           |
| Internal<br>Medicine/Me<br>dicine | 51,92<br>6.46 | 51,81<br>1.16 | 50,42<br>9.82 | 51,31<br>9.95 | 53,51<br>8.16 | 53,92<br>3.50 | 47,24<br>0.95 | 55,96<br>1.90 | 61,75<br>5.06 | 66,37<br>8.50 |
| Neurology                         | 48,82<br>4.33 | 44,86<br>0.50 | 48,19<br>7.95 | 49,64<br>7.19 | 50,24<br>4.97 | 56,36<br>7.65 | 42,55<br>8.86 | 56,27<br>9.00 | 54,61<br>6.14 | 63,34<br>0.64 |

|                                       |               |               |               |               |               |               |               |               |               |               |
|---------------------------------------|---------------|---------------|---------------|---------------|---------------|---------------|---------------|---------------|---------------|---------------|
| Neurosurger<br>y                      | 52,67<br>6.12 | 45,67<br>6.25 | 42,29<br>3.62 | 51,61<br>3.00 | 50,25<br>3.00 | 53,84<br>4.20 | 58,78<br>7.33 | 53,45<br>1.73 | 55,31<br>3.00 | 60,52<br>4.92 |
| Obstetrics<br>and<br>Gynecology       | 52,34<br>3.00 | 48,36<br>8.00 | 43,78<br>7.75 | 53,76<br>8.00 | 55,17<br>0.80 | 57,28<br>1.00 | 48,73<br>0.00 | 59,25<br>0.00 | 62,02<br>7.60 | 60,79<br>8.40 |
| Ophthalmolo<br>gy                     | 45,09<br>4.75 | 50,12<br>3.71 | 55,00<br>8.00 | 54,53<br>6.44 | 53,67<br>6.33 | 49,73<br>8.75 | 43,04<br>0.30 | 59,95<br>3.43 | 59,13<br>1.89 | 56,72<br>7.30 |
| Orthopedics                           | 49,33<br>8.00 | 48,07<br>5.67 | 50,39<br>2.60 | 46,26<br>9.20 | 53,57<br>4.33 | 48,08<br>2.83 | 55,24<br>0.00 | 61,27<br>1.14 | 63,76<br>2.00 | 67,32<br>1.00 |
| Otolaryngolo<br>gy                    | 52,74<br>7.00 | 54,84<br>3.71 | 50,68<br>1.71 | 50,84<br>3.50 | 49,50<br>8.33 | 57,82<br>2.62 | 42,48<br>9.86 | 54,20<br>4.30 | 62,45<br>6.62 | 72,39<br>5.00 |
| Pathology                             | 51,87<br>3.14 | 50,88<br>6.24 | 43,41<br>3.09 | 46,49<br>4.82 | 52,48<br>9.91 | 54,73<br>7.84 | 37,18<br>0.08 | 61,86<br>9.82 | 61,22<br>8.88 | 55,82<br>8.23 |
| Pediatrics                            | 53,55<br>9.40 | 52,42<br>7.22 | 51,92<br>9.29 | 51,19<br>0.00 | 48,16<br>4.61 | 45,49<br>1.18 | 49,13<br>2.40 | 58,63<br>9.23 | 60,93<br>9.11 | 55,60<br>0.83 |
| Physical<br>Medicine &<br>Rehab       | 51,32<br>6.00 | 51,82<br>1.00 | NaN           | 55,98<br>2.00 | 40,79<br>5.00 | 68,94<br>9.00 | 62,76<br>3.00 | 61,51<br>6.50 | 65,69<br>4.00 | 68,43<br>6.00 |
| Plastic<br>Surgery                    | NaN           | 70,55<br>2.00 | NaN           |
| Psychiatry                            | 49,25<br>5.31 | 47,98<br>0.59 | 47,06<br>8.46 | 48,24<br>8.08 | 52,73<br>3.33 | 53,79<br>7.79 | 40,61<br>0.76 | 55,41<br>8.88 | 58,60<br>5.48 | 63,16<br>9.34 |
| Radiation-<br>Diagnostic/O<br>ncology | 50,56<br>6.64 | 49,94<br>0.50 | 37,04<br>0.60 | 55,09<br>4.00 | 55,88<br>0.00 | 53,11<br>5.56 | 47,84<br>8.12 | 61,25<br>3.57 | 67,27<br>1.25 | 65,12<br>0.57 |
| Surgery                               | 48,88<br>8.53 | 50,66<br>6.33 | 50,92<br>1.23 | 51,72<br>1.74 | 54,73<br>2.95 | 51,36<br>0.80 | 55,39<br>3.12 | 64,26<br>2.30 | 67,22<br>0.20 | 72,71<br>6.73 |
| Urology                               | 58,20<br>2.00 | 53,06<br>6.00 | 55,67<br>0.00 | 44,50<br>0.00 | 60,38<br>0.00 | 51,87<br>8.67 | 39,43<br>4.67 | 74,08<br>6.00 | 65,60<br>6.00 | 80,35<br>8.00 |

Supplementary Table 46: Mean (standard deviation) T32-grant-funding-amount, by specialty,  
2011-2020

| Specialty                       | 2011           | 2012           | 2013           | 2014           | 2015           | 2016           | 2017           | 2018           | 2019           | 2020           |
|---------------------------------|----------------|----------------|----------------|----------------|----------------|----------------|----------------|----------------|----------------|----------------|
| Anesthesiology                  | 177,3<br>13.40 | 176,0<br>64.90 | 194,9<br>42.40 | 191,6<br>64.00 | 229,1<br>97.30 | 261,4<br>18.50 | 214,9<br>19.70 | 265,1<br>84.00 | 254,1<br>69.90 | 299,7<br>45.20 |
| Dermatology                     | 187,1<br>96.80 | 203,8<br>36.20 | 188,5<br>49.20 | 167,2<br>28.80 | 214,4<br>51.50 | 214,3<br>13.90 | 206,1<br>42.70 | 217,9<br>67.20 | 279,5<br>71.00 | 254,4<br>16.00 |
| Emergency Medicine              | NaN            | NaN            | NaN            | NaN            | NaN            | 168,9<br>66.00 | 369,7<br>97.00 | 446,9<br>84.50 | 458,0<br>56.00 | 365,5<br>62.00 |
| Family Medicine                 | 246,9<br>91.00 | 292,8<br>99.00 | 254,7<br>36.30 | 297,3<br>05.80 | 376,7<br>85.20 | 332,1<br>18.50 | 243,9<br>77.20 | 347,8<br>68.00 | 368,0<br>96.20 | 349,9<br>01.40 |
| Internal Medicine/<br>Medicine  | 301,0<br>89.20 | 298,0<br>71.10 | 312,7<br>95.30 | 315,7<br>49.30 | 340,1<br>96.50 | 351,4<br>12.10 | 265,6<br>24.40 | 362,5<br>08.90 | 387,7<br>54.70 | 381,5<br>41.10 |
| Neurology                       | 257,9<br>44.60 | 248,8<br>75.60 | 259,8<br>35.60 | 313,4<br>42.20 | 310,6<br>45.00 | 332,0<br>14.40 | 284,2<br>66.30 | 313,2<br>33.30 | 259,7<br>61.20 | 311,4<br>63.30 |
| Neurosurgery                    | 197,1<br>92.30 | 177,1<br>60.70 | 193,9<br>40.30 | 199,9<br>63.30 | 347,8<br>13.40 | 363,9<br>70.00 | 273,9<br>69.30 | 568,3<br>51.80 | 611,9<br>50.20 | 501,2<br>94.40 |
| Obstetrics<br>and<br>Gynecology | 199,3<br>58.80 | 216,5<br>80.20 | 210,5<br>01.20 | 238,3<br>99.90 | 223,7<br>88.80 | 244,2<br>05.40 | 165,6<br>55.80 | 237,9<br>66.30 | 220,2<br>05.90 | 260,3<br>06.00 |
| Ophthalmology                   | 191,9<br>42.20 | 198,4<br>28.80 | 211,3<br>19.40 | 231,0<br>37.90 | 235,6<br>02.10 | 214,2<br>93.00 | 139,3<br>47.60 | 184,7<br>28.10 | 187,2<br>65.60 | 206,6<br>01.10 |
| Orthopedics                     | 218,8<br>41.90 | 231,3<br>24.10 | 227,9<br>27.00 | 231,0<br>27.90 | 240,8<br>19.90 | 239,4<br>98.30 | 229,0<br>04.50 | 223,9<br>53.60 | 239,2<br>65.70 | 259,1<br>78.40 |
| Otolaryngology                  | 206,4<br>10.50 | 278,2<br>68.20 | 258,7<br>90.70 | 262,2<br>84.30 | 264,0<br>87.20 | 251,1<br>68.30 | 149,7<br>35.40 | 257,1<br>86.90 | 267,7<br>36.80 | 301,9<br>86.80 |
| Pathology                       | 380,7<br>84.30 | 389,2<br>68.50 | 374,9<br>45.80 | 340,5<br>87.00 | 359,9<br>71.80 | 343,5<br>85.70 | 281,6<br>90.50 | 368,2<br>87.30 | 386,5<br>28.50 | 366,8<br>98.70 |
| Pediatrics                      | 226,5<br>69.60 | 242,4<br>87.10 | 251,7<br>49.30 | 248,8<br>90.50 | 272,0<br>19.20 | 292,2<br>32.50 | 249,1<br>66.00 | 332,1<br>39.50 | 338,4<br>72.10 | 358,1<br>33.20 |
| Physical<br>Medicine &<br>Rehab | 159,0<br>13.20 | 266,9<br>58.20 | 272,9<br>75.00 | 281,3<br>19.30 | 313,0<br>34.30 | 250,9<br>43.80 | 212,6<br>67.80 | 257,4<br>76.20 | 315,6<br>93.50 | 320,9<br>02.00 |
| Plastic<br>Surgery              | NaN            |



|                                   |                |                |                |                |                |                |                |                |                |                |
|-----------------------------------|----------------|----------------|----------------|----------------|----------------|----------------|----------------|----------------|----------------|----------------|
| Psychiatry                        | 260,4<br>61.80 | 261,5<br>52.40 | 254,0<br>36.70 | 241,9<br>28.30 | 255,4<br>08.40 | 286,0<br>70.20 | 197,4<br>95.20 | 312,2<br>47.00 | 333,8<br>55.00 | 367,2<br>56.80 |
| Radiation-Diagnostic/<br>Oncology | 253,5<br>84.50 | 204,7<br>44.00 | 211,4<br>28.10 | 187,9<br>40.40 | 195,6<br>05.00 | 266,9<br>52.50 | 181,9<br>65.90 | 243,5<br>91.80 | 259,0<br>48.50 | 255,3<br>30.70 |
| Surgery                           | 233,5<br>08.00 | 219,1<br>60.50 | 208,3<br>87.80 | 225,1<br>32.50 | 218,7<br>62.10 | 251,5<br>69.50 | 231,5<br>38.90 | 302,1<br>09.40 | 307,9<br>81.10 | 298,9<br>42.30 |
| Urology                           | 154,9<br>11.30 | 152,9<br>47.90 | 164,4<br>63.90 | 145,8<br>10.40 | 129,5<br>97.00 | 151,0<br>69.50 | 155,8<br>45.80 | 167,2<br>94.00 | 247,1<br>90.80 | 288,9<br>56.20 |

Supplementary Table 47: Mean (standard deviation) K01-grant-funding-amount, by specialty,

2011-2020

| Specialty                      | 2011           | 2012           | 2013           | 2014           | 2015           | 2016           | 2017           | 2018           | 2019           | 2020           |
|--------------------------------|----------------|----------------|----------------|----------------|----------------|----------------|----------------|----------------|----------------|----------------|
| Anesthesiology                 | 120,0<br>86.20 | 121,1<br>51.50 | 115,7<br>88.80 | 122,6<br>31.20 | 176,8<br>29.40 | 177,6<br>05.20 | 171,8<br>22.00 | 151,0<br>97.00 | 131,0<br>69.00 | 141,4<br>91.00 |
| Dermatology                    | 93,78<br>5.25  | 116,7<br>32.20 | 99,33<br>0.00  | 111,2<br>10.00 | 107,8<br>73.70 | 111,2<br>86.00 | 116,4<br>04.90 | 103,1<br>61.40 | 102,9<br>86.40 | 117,4<br>90.50 |
| Emergency Medicine             | NaN            | 136,3<br>04.00 | 134,0<br>16.00 | 132,1<br>82.00 | 137,9<br>36.00 | NaN            | NaN            | 40,55<br>6.00  | 123,2<br>54.00 | 123,6<br>60.00 |
| Family Medicine                | 112,8<br>45.90 | 120,0<br>51.80 | 118,1<br>57.40 | 128,0<br>02.10 | 132,8<br>17.90 | 133,9<br>41.40 | 135,7<br>47.60 | 141,9<br>63.10 | 129,6<br>95.10 | 138,8<br>19.10 |
| Internal Medicine/<br>Medicine | 127,5<br>09.60 | 123,1<br>47.00 | 123,9<br>03.40 | 130,0<br>04.80 | 129,2<br>90.10 | 132,7<br>24.20 | 144,2<br>42.50 | 142,9<br>69.40 | 143,3<br>27.00 | 140,7<br>42.80 |
| Neurology                      | 134,9<br>05.80 | 139,4<br>54.80 | 144,5<br>48.50 | 150,2<br>52.70 | 147,0<br>94.90 | 147,8<br>26.80 | 136,7<br>08.40 | 138,6<br>98.20 | 129,7<br>02.90 | 123,3<br>81.30 |
| Neurosurgery                   | 99,35<br>3.33  | 80,34<br>7.00  | 126,6<br>44.00 | NaN            | NaN            | 104,7<br>60.00 | NaN            | 158,7<br>80.50 | 151,3<br>24.70 | 109,3<br>57.30 |
| Obstetrics and<br>Gynecology   | 139,6<br>35.50 | 171,0<br>26.00 | 156,3<br>77.50 | 159,9<br>80.20 | 155,7<br>28.00 | 148,4<br>07.80 | 136,1<br>59.00 | 128,4<br>88.00 | 127,9<br>63.10 | 139,2<br>34.20 |

|                                   |                |                |                |                |                |                |                |                |                |                |
|-----------------------------------|----------------|----------------|----------------|----------------|----------------|----------------|----------------|----------------|----------------|----------------|
| Ophthalmology                     | NaN            | NaN            | NaN            | 131,1<br>22.00 | NaN            | NaN            | 145,2<br>08.00 | 126,6<br>03.50 | 129,9<br>63.00 | 145,2<br>08.00 |
| Orthopedics                       | 123,5<br>79.60 | 117,9<br>38.50 | 115,4<br>94.70 | 121,4<br>95.10 | 110,5<br>10.50 | 126,4<br>30.90 | 124,9<br>89.00 | 123,0<br>20.40 | 116,7<br>02.50 | 117,5<br>02.00 |
| Otolaryngology                    | 137,1<br>82.00 | 137,1<br>82.00 | 137,1<br>88.00 | 129,9<br>52.00 | NaN            | NaN            | NaN            | NaN            | NaN            | 129,7<br>71.00 |
| Pathology                         | 118,3<br>30.60 | 116,7<br>86.60 | 113,1<br>68.80 | 107,1<br>58.60 | 115,9<br>22.80 | 167,6<br>22.70 | 161,9<br>73.60 | 147,4<br>23.50 | 121,8<br>76.90 | 131,6<br>35.80 |
| Pediatrics                        | 124,2<br>42.00 | 133,7<br>66.00 | 126,9<br>37.50 | 129,7<br>47.30 | 135,8<br>99.90 | 123,4<br>47.50 | 137,2<br>37.00 | 145,5<br>05.60 | 150,0<br>86.00 | 133,0<br>47.70 |
| Physical Medicine & Rehab         | 114,6<br>34.30 | 91,35<br>3.75  | 122,3<br>54.20 | 122,0<br>99.50 | 123,4<br>07.00 | 124,0<br>27.90 | 129,6<br>60.80 | 128,0<br>24.50 | 133,5<br>54.80 | 125,8<br>54.80 |
| Plastic Surgery                   | NaN            |
| Psychiatry                        | 148,6<br>55.30 | 144,6<br>51.20 | 145,2<br>83.70 | 152,4<br>43.40 | 149,0<br>52.30 | 151,9<br>38.30 | 149,6<br>47.70 | 156,7<br>58.20 | 154,1<br>75.90 | 150,8<br>47.70 |
| Radiation-Diagnostic/<br>Oncology | 122,9<br>74.40 | 130,7<br>06.80 | 116,7<br>22.90 | 143,1<br>48.50 | 122,1<br>57.10 | 137,7<br>92.70 | 142,3<br>46.30 | 135,3<br>74.40 | 128,7<br>13.10 | 137,4<br>45.50 |
| Surgery                           | 124,8<br>55.50 | 122,9<br>72.90 | 112,7<br>57.30 | 126,5<br>19.10 | 135,3<br>41.40 | 142,9<br>70.80 | 160,0<br>80.20 | 176,6<br>46.70 | 171,6<br>99.50 | 144,5<br>24.30 |
| Urology                           | 105,8<br>23.00 | 105,8<br>23.00 | 105,8<br>23.00 | 137,4<br>84.00 | 146,7<br>30.30 | 148,4<br>09.80 | 141,0<br>16.20 | 140,0<br>84.40 | 139,7<br>84.40 | 144,7<br>82.30 |

Supplementary Table 48: Mean (standard deviation) K08-grant-funding-amount, by specialty.

2011-2020

| Specialty      | 2011           | 2012           | 2013           | 2014           | 2015           | 2016           | 2017           | 2018           | 2019           | 2020           |
|----------------|----------------|----------------|----------------|----------------|----------------|----------------|----------------|----------------|----------------|----------------|
| Anesthesiology | 125,8<br>68.50 | 130,7<br>66.60 | 138,0<br>82.60 | 151,6<br>76.50 | 163,0<br>94.40 | 171,5<br>24.70 | 166,3<br>95.30 | 180,5<br>76.00 | 180,6<br>29.80 | 173,0<br>59.70 |

|                                   |                |                |                |                |                |                |                |                |                |                |
|-----------------------------------|----------------|----------------|----------------|----------------|----------------|----------------|----------------|----------------|----------------|----------------|
| Dermatology                       | 123,6<br>34.20 | 121,5<br>01.10 | 113,9<br>92.10 | 108,3<br>00.60 | 120,1<br>00.30 | 161,1<br>98.20 | 139,8<br>80.80 | 163,7<br>78.70 | 143,9<br>89.70 | 162,8<br>67.30 |
| Emergency<br>Medicine             | 141,5<br>86.00 | 142,0<br>15.50 | 125,0<br>40.90 | 148,1<br>79.80 | 149,1<br>05.00 | 155,8<br>94.10 | 162,2<br>61.10 | 160,5<br>46.60 | 159,0<br>30.30 | 160,1<br>15.70 |
| Family<br>Medicine                | 122,2<br>05.80 | 123,1<br>84.80 | 135,5<br>54.20 | 137,6<br>68.00 | 148,1<br>87.00 | 145,8<br>19.00 | 168,0<br>48.00 | 168,0<br>48.00 | 171,5<br>62.00 | 167,9<br>57.70 |
| Internal<br>Medicine/<br>Medicine | 135,4<br>78.30 | 134,6<br>15.70 | 136,9<br>43.70 | 142,6<br>69.50 | 140,4<br>45.70 | 154,2<br>66.60 | 162,7<br>95.70 | 165,7<br>45.00 | 165,8<br>70.80 | 171,9<br>82.30 |
| Neurology                         | 162,3<br>83.80 | 160,5<br>99.20 | 168,9<br>10.60 | 175,4<br>36.80 | 156,8<br>46.60 | 164,1<br>11.20 | 183,3<br>34.50 | 189,6<br>98.70 | 186,4<br>28.20 | 189,5<br>01.70 |
| Neurosurge<br>ry                  | 165,6<br>81.90 | 170,9<br>39.90 | 160,6<br>63.30 | 164,7<br>08.70 | 150,6<br>93.80 | 155,6<br>05.60 | 158,7<br>27.40 | 182,5<br>94.00 | 182,3<br>23.80 | 180,5<br>07.00 |
| Obstetrics<br>and<br>Gynecology   | 134,0<br>50.10 | 134,5<br>79.40 | 136,0<br>49.00 | 119,6<br>64.60 | 121,8<br>78.00 | 124,5<br>69.00 | 166,8<br>88.00 | 181,4<br>63.60 | 184,9<br>82.20 | 186,0<br>92.80 |
| Ophthalmol<br>ogy                 | 204,3<br>50.20 | 210,9<br>72.40 | 184,0<br>14.60 | 212,9<br>11.40 | 203,6<br>95.00 | 194,0<br>94.20 | 203,7<br>72.30 | 195,5<br>69.10 | 202,1<br>54.30 | 195,0<br>95.20 |
| Orthopedics                       | 179,2<br>80.00 | 134,3<br>64.00 | 129,7<br>74.80 | 109,4<br>54.50 | 121,2<br>47.50 | 174,1<br>53.00 | 171,5<br>47.70 | 147,3<br>46.10 | 120,9<br>88.70 | 141,3<br>96.10 |
| Otolaryngol<br>ogy                | 166,2<br>28.00 | 156,3<br>62.90 | 176,8<br>30.70 | 183,3<br>44.60 | 188,7<br>73.70 | 188,1<br>30.90 | 187,1<br>16.00 | 193,3<br>39.30 | 180,5<br>46.90 | 187,9<br>86.70 |
| Pathology                         | 127,9<br>19.40 | 129,8<br>89.90 | 127,0<br>00.10 | 147,2<br>48.60 | 142,6<br>33.30 | 163,7<br>02.00 | 152,1<br>11.60 | 167,1<br>91.40 | 174,7<br>99.40 | 174,1<br>70.30 |
| Pediatrics                        | 131,7<br>01.80 | 137,7<br>11.50 | 139,3<br>56.10 | 143,8<br>65.50 | 142,3<br>23.10 | 147,4<br>70.40 | 161,7<br>04.00 | 167,0<br>77.30 | 171,6<br>53.00 | 172,2<br>28.00 |
| Physical<br>Medicine &<br>Rehab   | 124,9<br>29.00 | 124,9<br>29.00 | 124,9<br>29.00 | NaN            | NaN            | NaN            | NaN            | 171,0<br>84.00 | 171,0<br>45.00 | 171,7<br>20.00 |
| Plastic<br>Surgery                | NaN            |
| Psychiatry                        | 167,1<br>65.70 | 162,0<br>22.70 | 156,5<br>12.70 | 160,7<br>74.70 | 168,3<br>84.70 | 169,3<br>55.80 | 170,5<br>72.30 | 160,7<br>70.60 | 171,3<br>69.90 | 177,5<br>36.00 |

|                                   |                |                |                |                |                |                |                |                |                |                |
|-----------------------------------|----------------|----------------|----------------|----------------|----------------|----------------|----------------|----------------|----------------|----------------|
| Radiation-Diagnostic/<br>Oncology | 162,2<br>87.60 | 163,9<br>95.20 | 163,9<br>95.20 | 152,4<br>87.80 | 138,6<br>29.30 | 171,7<br>20.00 | 177,4<br>45.30 | 203,3<br>90.30 | 206,2<br>62.70 | 208,7<br>23.60 |
| Surgery                           | 133,9<br>71.00 | 141,1<br>33.80 | 133,4<br>10.60 | 142,8<br>76.00 | 142,6<br>39.40 | 161,2<br>31.70 | 162,6<br>46.80 | 166,6<br>54.40 | 170,0<br>87.20 | 173,3<br>47.90 |
| Urology                           | 152,1<br>09.50 | 149,6<br>71.80 | 126,4<br>33.20 | 151,4<br>79.60 | 165,4<br>70.20 | 164,8<br>94.80 | 168,6<br>76.40 | 166,0<br>15.60 | 222,2<br>28.60 | 219,6<br>11.00 |

Supplementary Table 49: Mean (standard deviation) K23-grant-funding-amount, by specialty,

2011-2020

| Specialty                      | 2011           | 2012           | 2013           | 2014           | 2015           | 2016           | 2017           | 2018           | 2019           | 2020           |
|--------------------------------|----------------|----------------|----------------|----------------|----------------|----------------|----------------|----------------|----------------|----------------|
| Anesthesiology                 | 133,3<br>40.70 | 155,8<br>30.60 | 141,4<br>49.70 | 156,5<br>72.20 | 154,4<br>26.80 | 153,8<br>13.90 | 172,8<br>64.50 | 179,4<br>65.90 | 180,7<br>55.90 | 175,1<br>25.70 |
| Dermatology                    | 122,5<br>63.30 | 122,6<br>75.50 | 83,99<br>5.33  | 123,0<br>12.00 | 85,71<br>0.67  | 167,1<br>54.20 | 173,4<br>53.20 | 151,5<br>82.90 | 155,7<br>09.10 | 167,4<br>17.10 |
| Emergency Medicine             | 130,2<br>36.80 | 140,7<br>47.70 | 154,0<br>86.90 | 154,1<br>24.70 | 147,5<br>63.30 | 163,8<br>34.90 | 177,7<br>80.20 | 175,4<br>07.00 | 178,9<br>53.30 | 172,6<br>96.90 |
| Family Medicine                | 154,1<br>95.60 | 156,9<br>56.10 | 150,1<br>09.50 | 146,5<br>38.00 | 107,9<br>60.80 | 146,2<br>44.80 | 161,5<br>28.00 | 160,1<br>74.80 | 164,1<br>66.00 | 157,2<br>10.60 |
| Internal Medicine/<br>Medicine | 145,0<br>51.40 | 146,5<br>90.90 | 149,2<br>45.80 | 148,4<br>08.90 | 147,0<br>55.30 | 165,6<br>04.00 | 175,0<br>93.50 | 178,4<br>88.30 | 180,5<br>32.60 | 175,6<br>48.40 |
| Neurology                      | 147,4<br>74.40 | 151,8<br>74.90 | 162,0<br>50.10 | 167,6<br>42.70 | 165,9<br>94.60 | 163,4<br>94.20 | 182,5<br>82.00 | 176,3<br>33.10 | 177,6<br>08.00 | 184,7<br>99.30 |
| Neurosurgery                   | 185,9<br>74.00 | 177,9<br>87.20 | 184,4<br>67.40 | 173,7<br>11.80 | 167,9<br>26.40 | 145,4<br>47.80 | 183,5<br>68.00 | 183,7<br>66.00 | 185,4<br>17.40 | 187,1<br>05.50 |
| Obstetrics and<br>Gynecology   | 133,5<br>24.90 | 129,0<br>24.90 | 126,1<br>27.10 | 121,0<br>42.70 | 115,9<br>83.90 | 129,6<br>04.80 | 163,3<br>54.60 | 169,0<br>60.50 | 173,4<br>01.20 | 169,4<br>82.20 |
| Ophthalmology                  | 190,2<br>13.70 | 213,3<br>59.00 | 203,3<br>72.30 | 203,4<br>70.50 | 207,1<br>28.10 | 203,4<br>77.50 | 217,2<br>57.90 | 193,2<br>81.00 | 214,9<br>18.40 | 211,7<br>00.00 |

|                                       |                |                |                |                |                |                |                |                |                |                |
|---------------------------------------|----------------|----------------|----------------|----------------|----------------|----------------|----------------|----------------|----------------|----------------|
| Orthopedics                           | 168,7<br>29.00 | 130,2<br>44.00 | 106,7<br>38.30 | 106,0<br>01.00 | 97,25<br>2.50  | 173,2<br>99.00 | 173,2<br>32.00 | 123,0<br>99.70 | 164,5<br>54.30 | 136,9<br>15.80 |
| Otolaryngology                        | 185,6<br>35.10 | 208,5<br>91.80 | 205,7<br>98.00 | 211,2<br>81.60 | 216,5<br>75.50 | 194,8<br>94.20 | 202,7<br>67.70 | 202,5<br>68.80 | 191,3<br>98.80 | 151,9<br>49.50 |
| Pathology                             | 129,1<br>32.00 | 133,4<br>31.30 | 132,3<br>75.00 | 135,0<br>50.00 | 138,5<br>77.00 | 136,9<br>84.00 | 146,0<br>11.00 | 142,3<br>88.00 | 190,0<br>80.00 | 175,9<br>13.00 |
| Pediatrics                            | 137,7<br>62.10 | 137,0<br>20.20 | 138,2<br>14.20 | 136,0<br>91.10 | 138,9<br>11.50 | 157,7<br>33.50 | 175,0<br>92.30 | 176,1<br>04.60 | 174,3<br>08.50 | 172,7<br>38.90 |
| Physical<br>Medicine &<br>Rehab       | 142,0<br>22.90 | 157,1<br>35.50 | 151,1<br>14.80 | 136,5<br>24.80 | 144,9<br>86.60 | 123,1<br>12.70 | 165,3<br>57.30 | 135,0<br>80.00 | 151,4<br>05.00 | 147,4<br>40.30 |
| Plastic<br>Surgery                    | NaN            |
| Psychiatry                            | 160,2<br>34.10 | 155,5<br>82.30 | 161,9<br>32.10 | 162,7<br>80.60 | 156,4<br>67.60 | 164,7<br>14.30 | 177,2<br>92.20 | 173,8<br>83.30 | 175,9<br>00.20 | 173,8<br>24.60 |
| Radiation-<br>Diagnostic/<br>Oncology | 158,6<br>02.70 | 164,7<br>72.20 | 157,9<br>04.80 | 162,6<br>07.20 | 161,6<br>41.00 | 173,6<br>02.00 | 180,6<br>37.50 | 179,6<br>85.00 | 195,6<br>96.00 | 192,5<br>98.70 |
| Surgery                               | 131,0<br>87.50 | 139,2<br>26.80 | 134,4<br>89.40 | 142,8<br>86.30 | 146,9<br>46.70 | 193,9<br>53.80 | 178,8<br>72.20 | 183,1<br>33.10 | 172,9<br>33.60 | 172,7<br>45.80 |
| Urology                               | 157,1<br>60.00 | 153,9<br>43.00 | 148,4<br>64.50 | 155,1<br>36.30 | 150,5<br>95.50 | 145,3<br>59.70 | 156,0<br>11.50 | 144,3<br>13.00 | 168,4<br>59.00 | 167,7<br>96.70 |

Supplementary Table 50: Mean (standard deviation) U01-grant-funding-amount, by specialty.

2011-2020

| Specialty      | 2011           | 2012           | 2013           | 2014           | 2015           | 2016           | 2017           | 2018           | 2019           | 2020           |
|----------------|----------------|----------------|----------------|----------------|----------------|----------------|----------------|----------------|----------------|----------------|
| Anesthesiology | 471,9<br>64.90 | 451,0<br>71.30 | 502,3<br>29.90 | 581,2<br>82.50 | 659,5<br>61.00 | 805,7<br>47.30 | 646,6<br>45.70 | 558,2<br>55.40 | 952,1<br>99.00 | 788,9<br>65.70 |
| Dermatology    | 269,8<br>79.00 | 501,2<br>25.00 | 351,1<br>36.30 | 373,1<br>38.20 | 510,1<br>95.50 | 549,8<br>49.80 | 636,4<br>70.60 | 593,7<br>21.30 | 908,4<br>51.60 | 478,9<br>07.70 |

|                                     |                      |                      |                      |                      |                      |                      |                      |                      |                      |                      |
|-------------------------------------|----------------------|----------------------|----------------------|----------------------|----------------------|----------------------|----------------------|----------------------|----------------------|----------------------|
| Emergency<br>Medicine               | 1,824,<br>301.0<br>0 | 1,298,<br>073.0<br>0 | 482,6<br>28.40       | 501,5<br>35.70       | 551,2<br>03.10       | 661,0<br>67.80       | 1,613,<br>430.0<br>0 | 3,157,<br>825.0<br>0 | 657,9<br>01.70       | 2,040,<br>631.0<br>0 |
| Family<br>Medicine                  | 478,9<br>66.10       | 586,5<br>68.90       | 742,6<br>43.20       | 893,9<br>27.70       | 788,6<br>54.90       | 643,2<br>50.80       | 481,8<br>80.50       | 589,5<br>15.60       | 664,7<br>95.80       | 808,7<br>22.80       |
| Internal<br>Medicine/<br>Medicine   | 1,022,<br>969.0<br>0 | 964,1<br>65.60       | 989,8<br>27.10       | 1,092,<br>075.0<br>0 | 886,9<br>28.90       | 858,9<br>66.50       | 893,3<br>01.00       | 856,5<br>48.70       | 1,092,<br>779.0<br>0 | 1,185,<br>112.0<br>0 |
| Neurology                           | 1,871,<br>063.0<br>0 | 1,720,<br>465.0<br>0 | 1,787,<br>908.0<br>0 | 1,467,<br>034.0<br>0 | 1,155,<br>044.0<br>0 | 1,126,<br>302.0<br>0 | 1,135,<br>458.0<br>0 | 1,597,<br>367.0<br>0 | 1,513,<br>014.0<br>0 | 1,832,<br>220.0<br>0 |
| Neurosurg<br>ery                    | 768,3<br>40.80       | 1,148,<br>616.0<br>0 | 1,956,<br>889.0<br>0 | 2,148,<br>264.0<br>0 | 880,1<br>15.20       | 954,2<br>29.30       | 1,090,<br>613.0<br>0 | 661,1<br>40.50       | 684,1<br>17.00       | 699,0<br>07.20       |
| Obstetrics<br>and<br>Gynecolo<br>gy | 1,693,<br>429.0<br>0 | 1,003,<br>004.0<br>0 | 651,9<br>69.90       | 846,9<br>32.70       | 2,061,<br>479.0<br>0 | 749,8<br>91.80       | 549,3<br>67.70       | 1,023,<br>898.0<br>0 | 893,0<br>43.90       | 769,5<br>62.20       |
| Ophthalm<br>ology                   | 586,6<br>12.20       | 350,0<br>67.90       | 387,4<br>25.60       | 271,1<br>15.80       | 593,4<br>46.80       | 745,4<br>73.40       | 645,9<br>30.80       | 615,7<br>81.70       | 567,4<br>01.30       | 992,6<br>40.80       |
| Orthopedi<br>cs                     | NaN                  | NaN                  | 521,6<br>39.00       | 328,7<br>01.50       | 196,6<br>80.00       | 196,6<br>80.00       | NaN                  | NaN                  | 705,0<br>76.00       | 648,4<br>12.00       |
| Otolaryng<br>ology                  | 353,1<br>77.20       | 207,4<br>93.50       | 380,5<br>67.70       | 262,2<br>56.00       | 870,4<br>22.00       | 799,6<br>32.30       | 725,3<br>23.20       | 805,4<br>66.80       | 537,7<br>63.50       | 777,5<br>54.20       |
| Pathology                           | 838,1<br>84.80       | 549,6<br>37.20       | 591,7<br>87.10       | 595,5<br>58.00       | 677,2<br>60.50       | 776,4<br>69.70       | 845,6<br>71.50       | 929,2<br>43.10       | 787,0<br>17.40       | 869,7<br>87.10       |
| Pediatrics                          | 754,2<br>55.50       | 776,1<br>44.10       | 785,3<br>61.80       | 842,3<br>53.10       | 758,2<br>05.00       | 825,5<br>54.30       | 779,6<br>08.50       | 799,3<br>93.60       | 745,5<br>82.70       | 671,7<br>52.30       |
| Physical<br>Medicine<br>& Rehab     | 142,1<br>61.00       | 207,4<br>61.00       | 542,6<br>62.10       | 497,7<br>52.60       | 486,3<br>71.40       | 724,5<br>39.40       | 714,9<br>31.60       | 323,2<br>80.20       | 1,693,<br>692.0<br>0 | 2,602,<br>043.0<br>0 |
| Plastic<br>Surgery                  | NaN                  | 430,3<br>75.00       | 430,3<br>74.00       | 430,3<br>75.00       |

|                                |                |                |                |                |                |                |                |                |                      |                |
|--------------------------------|----------------|----------------|----------------|----------------|----------------|----------------|----------------|----------------|----------------------|----------------|
| Psychiatry                     | 783,9<br>33.80 | 675,0<br>10.60 | 676,8<br>36.10 | 716,9<br>49.10 | 647,9<br>15.90 | 715,4<br>27.10 | 684,9<br>31.10 | 666,0<br>83.20 | 1,007,<br>650.0<br>0 | 999,2<br>33.70 |
| Radiation-Diagnostic /Oncology | 473,5<br>32.00 | 477,6<br>37.40 | 630,6<br>09.80 | 659,9<br>58.20 | 575,2<br>29.00 | 597,8<br>57.80 | 877,8<br>38.40 | 693,7<br>46.60 | 707,1<br>58.00       | 783,1<br>93.20 |
| Surgery                        | 577,1<br>15.30 | 739,6<br>04.80 | 680,9<br>29.60 | 729,5<br>61.00 | 787,5<br>91.30 | 760,0<br>11.10 | 612,4<br>48.50 | 621,9<br>61.60 | 704,7<br>49.40       | 564,1<br>66.70 |
| Urology                        | 960,9<br>07.90 | 756,2<br>19.90 | 694,7<br>23.70 | 386,7<br>26.50 | 385,3<br>23.20 | 454,0<br>59.60 | 402,1<br>82.40 | 532,1<br>57.50 | 707,7<br>67.40       | 368,4<br>46.40 |

Supplementary Table 51: Mean (standard deviation) P30-grant-funding-amount, by specialty,

2011-2020

| Specialty                   | 2011                 | 2012                 | 2013                 | 2014                 | 2015                 | 2016                 | 2017                 | 2018                 | 2019                 | 2020                 |
|-----------------------------|----------------------|----------------------|----------------------|----------------------|----------------------|----------------------|----------------------|----------------------|----------------------|----------------------|
| Anesthesiology              | NaN                  | NaN                  | NaN                  | 999,6<br>65.00       | NaN                  | NaN                  | NaN                  | NaN                  | NaN                  | NaN                  |
| Dermatology                 | 508,8<br>03.50       | 541,8<br>94.10       | 757,0<br>22.80       | 626,2<br>58.90       | 809,8<br>39.80       | 619,2<br>43.90       | 595,1<br>69.40       | 658,4<br>03.00       | 775,4<br>27.80       | 777,1<br>73.80       |
| Emergency Medicine          | NaN                  |
| Family Medicine             | NaN                  | 119,9<br>90.50       | 118,3<br>47.00       | 118,7<br>86.20       | 118,7<br>93.20       | 118,7<br>69.50       | 1,499,<br>404.0<br>0 | 1,631,<br>702.0<br>0 | 506,1<br>08.00       | 579,3<br>30.50       |
| Internal Medicine/ Medicine | 1,322,<br>479.0<br>0 | 1,476,<br>749.0<br>0 | 1,647,<br>969.0<br>0 | 1,595,<br>381.0<br>0 | 1,386,<br>675.0<br>0 | 1,343,<br>980.0<br>0 | 1,410,<br>555.0<br>0 | 1,289,<br>653.0<br>0 | 1,454,<br>688.0<br>0 | 1,360,<br>467.0<br>0 |
| Neurology                   | 909,6<br>00.70       | 792,8<br>08.50       | 874,8<br>68.00       | 926,0<br>21.70       | 955,0<br>91.90       | 972,8<br>88.10       | 913,5<br>50.00       | 924,6<br>25.30       | 1,004,<br>999.0<br>0 | 1,531,<br>679.0<br>0 |
| Neurosurgery                | 945,0<br>27.00       | 883,7<br>90.30       | 833,6<br>61.70       | 894,4<br>94.50       | 874,3<br>01.50       | 638,0<br>89.00       | 625,1<br>69.00       | 612,4<br>61.00       | 349,0<br>65.00       | NaN                  |

|                                |              |              |              |              |              |              |              |              |              |              |
|--------------------------------|--------------|--------------|--------------|--------------|--------------|--------------|--------------|--------------|--------------|--------------|
| Obstetrics and Gynecology      | 1,933,778.00 | 1,933,777.00 | 2,578,935.00 | 1,793,093.00 | 1,157,198.00 | 960,318.00   | NaN          | 825,564.00   | 484,487.50   | 517,036.80   |
| Ophthalmology                  | 604,815.60   | 584,035.50   | 587,455.10   | 595,992.60   | 595,040.80   | 627,412.80   | 628,117.10   | 566,308.50   | 676,475.90   | 662,129.10   |
| Orthopedics                    | 625,387.50   | 627,439.20   | 597,681.80   | 614,321.00   | 611,879.20   | 703,440.00   | 696,916.40   | 691,739.60   | 755,961.70   | 751,669.50   |
| Otolaryngology                 | 622,200.80   | 604,010.00   | 657,359.40   | 556,833.40   | 499,296.20   | 458,450.40   | 614,973.00   | 1,831,543.00 | 5,129,654.00 | 1,280,229.00 |
| Pathology                      | 1,470,235.00 | 957,377.10   | 1,815,262.00 | 1,575,747.00 | 1,348,339.00 | 1,711,069.00 | 1,424,948.00 | 704,481.40   | 989,077.50   | 1,091,643.00 |
| Pediatrics                     | 1,546,389.00 | 1,105,870.00 | 967,114.30   | 948,261.30   | 943,137.20   | 828,083.70   | 898,125.40   | 911,258.60   | 834,352.40   | 686,218.80   |
| Physical Medicine & Rehab      | NaN          |
| Plastic Surgery                | NaN          |
| Psychiatry                     | 1,359,067.00 | 1,143,958.00 | 1,148,220.00 | 1,078,633.00 | 964,003.10   | 1,121,970.00 | 1,060,552.00 | 1,061,952.00 | 791,983.70   | 1,084,308.00 |
| Radiation-Diagnostic /Oncology | 570,185.40   | 631,016.30   | 858,373.40   | 847,082.90   | 1,477,880.00 | 973,777.90   | 887,744.60   | 862,805.50   | 942,347.40   | 1,172,460.00 |
| Surgery                        | 1,941,377.00 | 1,953,115.00 | 1,619,891.00 | 1,331,107.00 | 1,580,976.00 | 1,334,913.00 | 1,881,459.00 | 1,268,240.00 | 1,355,662.00 | 1,473,755.00 |
| Urology                        | 690,688.70   | 787,747.80   | 788,214.80   | 883,989.70   | 890,415.50   | 703,540.90   | NaN          | NaN          | NaN          | NaN          |



Supplementary Table 52: Average grant-dollar-amount (in thousands of dollars), 2011-2020, by grant-type and specialty

| Year                          | R01 | R03 | R21 | F32 | T32 | K01 | K08 | K23 | U01   | P30   |
|-------------------------------|-----|-----|-----|-----|-----|-----|-----|-----|-------|-------|
| Anesthesiology                | 409 | 85  | 215 | 52  | 229 | 145 | 161 | 162 | 667   | 1,000 |
| Dermatology                   | 372 | 80  | 200 | 53  | 209 | 108 | 133 | 145 | 539   | 644   |
| Emergency Medicine            | 498 | 93  | 207 | 60  | 383 | 121 | 152 | 161 | 1,191 | 0     |
| Family Medicine               | 521 | 88  | 190 | 38  | 302 | 129 | 142 | 151 | 663   | 328   |
| Internal Medicine/Medicine    | 445 | 88  | 204 | 54  | 329 | 134 | 151 | 160 | 992   | 1,217 |
| Neurology                     | 471 | 93  | 219 | 52  | 288 | 139 | 173 | 168 | 1,487 | 1,022 |
| Neurosurgery                  | 390 | 92  | 234 | 53  | 380 | 117 | 167 | 177 | 1,013 | 731   |
| Obstetrics and Gynecology     | 417 | 79  | 206 | 55  | 220 | 141 | 152 | 141 | 1,120 | 1,079 |
| Ophthalmology                 | 418 | 101 | 208 | 53  | 197 | 133 | 201 | 206 | 591   | 580   |
| Orthopedics                   | 367 | 84  | 188 | 55  | 234 | 119 | 142 | 134 | 418   | 674   |
| Otolaryngology                | 413 | 134 | 194 | 54  | 241 | 135 | 180 | 196 | 569   | 365   |
| Pathology                     | 392 | 83  | 207 | 51  | 357 | 130 | 149 | 143 | 738   | 1,312 |
| Pediatrics                    | 438 | 87  | 207 | 53  | 276 | 134 | 152 | 156 | 774   | 940   |
| Physical Medicine & Rehab     | 437 | 92  | 213 | 61  | 252 | 125 | 148 | 144 | 674   | 0     |
| Plastic Surgery               | 346 | 77  | 0   | 71  | 0   | 0   | 0   | 0   | 430   | 0     |
| Psychiatry                    | 507 | 98  | 211 | 52  | 272 | 150 | 166 | 166 | 755   | 1,068 |
| Radiation-Diagnostic/Oncology | 448 | 87  | 210 | 53  | 226 | 132 | 184 | 169 | 683   | 953   |

|         |     |    |     |    |     |     |     |     |     |     |
|---------|-----|----|-----|----|-----|-----|-----|-----|-----|-----|
| Surgery | 405 | 88 | 203 | 57 | 251 | 143 | 152 | 158 | 675 | 940 |
| Urology | 351 | 90 | 194 | 53 | 169 | 139 | 162 | 156 | 553 | 782 |

For peer review only

## Appendix I

NIH centers and institutes are: National Cancer Institute (NCI), National Eye Institute (NEI), National Heart, Lung, and Blood Institute (NHLBI), National Human Genome Research Institute (NHGRI), National Institute on Aging (NIA), National Institute on Alcohol Abuse and Alcoholism (NIAAA), National Institute of Allergy and Infectious Diseases (NIAID), National Institute of Arthritis and Musculoskeletal and Skin Diseases (NIAMS), National Institute of Biomedical Imaging and Bioengineering (NIBIB), National Institute of Child Health and Human Development (NICHD), National Institute on Deafness and Other Communication Disorders (NIDCD), National Institute of Dental and Craniofacial Research (NIDCR), National Institute of Diabetes and Digestive and Kidney Diseases (NIDDK), National Institute on Drug Abuse (NIDA), National Institute of Environmental Health Sciences (NIEHS), National Institute of General Medical Sciences (NIGMS), National Institute of Mental Health (NIMH), National Institute on Minority Health and Health Disparities (NIMHHD), National Institute of Neurological Disorders and Stroke (NINDS), National Institute of Nursing Research (NINR), National Library of Medicine (NLM), Center for Information Technology (CIT), Center for Scientific Review (CSR), Fogarty International Center (FIC), National Center for Advancing Translational Sciences (NCATS), National Center for Complementary and Integrative Health (NCCIH) and the NIH Clinical Center (NIH CC).

## Appendix II

Grants included in the analysis are C06, D43, D71, DP1, DP2, DP3, DP5, DP7, F05, F30, F31, F32, F33, F99, G08, G11, G12, G13, G20, H25, H79, K00, K01, K02, K05, K06, K07, K08, K12, K18, K22, K23, K24, K25, K26, K30, K38, K76, K99, KL1, KL2, M01, N01, OT2, OT3, P01, P20, P2C, P30, P40, P41, P42, P50, P51, P60, PL1, PN2, R00, R01, R03, R13, R15, R18,

1  
2  
3 R21, R24, R25, R33, R34, R35, R36, R37, R38, R49, R50, R55, R56, R61, R90, RC2, RC4,  
4  
5 RF1, RL1, RL5, RL9, RM1, S10, S21, SC1, SC2, SC3, T01, T03, T15, T32, T34, T35, T36,  
6  
7 T37, T42, T90, TL1, U01, U10, U13, U18, U19, U24, U2C, U2G, U2R, U34, U38, U41, U42,  
8  
9 U45, U47, U48, U49, U50, U51, U52, U54, U56, U58, U59, U60, U62, U65, U79, U90, UC2,  
10  
11 UC4, UC7, UD1, UE5, UF1, UG1, UG3, UH2, UH3, UH4, UL1, UM1, UM2, UR3, and UR6.  
12  
13  
14  
15  
16  
17  
18  
19  
20  
21  
22  
23  
24  
25  
26  
27  
28  
29  
30  
31  
32  
33  
34  
35  
36  
37  
38  
39  
40  
41  
42  
43  
44  
45  
46  
47  
48  
49  
50  
51  
52  
53  
54  
55  
56  
57  
58  
59  
60

# BMJ Open

## Does NIH funding differ between medical specialties? A longitudinal analysis of NIH grant data by specialty and type of grant, 2011-2020

|                                 |                                                                                                          |
|---------------------------------|----------------------------------------------------------------------------------------------------------|
| Journal:                        | <i>BMJ Open</i>                                                                                          |
| Manuscript ID                   | bmjopen-2021-058191.R1                                                                                   |
| Article Type:                   | Original research                                                                                        |
| Date Submitted by the Author:   | 30-Aug-2022                                                                                              |
| Complete List of Authors:       | Schlaflly, Andrew; University of Pennsylvania Perelman School of Medicine,<br>Sebro, Ronnie; Mayo Clinic |
| <b>Primary Subject Heading</b>: | Research methods                                                                                         |
| Secondary Subject Heading:      | Public health                                                                                            |
| Keywords:                       | STATISTICS & RESEARCH METHODS, PUBLIC HEALTH, EDUCATION & TRAINING (see Medical Education & Training)    |
|                                 |                                                                                                          |

SCHOLARONE™  
Manuscripts



I, the Submitting Author has the right to grant and does grant on behalf of all authors of the Work (as defined in the below author licence), an exclusive licence and/or a non-exclusive licence for contributions from authors who are: i) UK Crown employees; ii) where BMJ has agreed a CC-BY licence shall apply, and/or iii) in accordance with the terms applicable for US Federal Government officers or employees acting as part of their official duties; on a worldwide, perpetual, irrevocable, royalty-free basis to BMJ Publishing Group Ltd ("BMJ") its licensees and where the relevant Journal is co-owned by BMJ to the co-owners of the Journal, to publish the Work in this journal and any other BMJ products and to exploit all rights, as set out in our [licence](#).

The Submitting Author accepts and understands that any supply made under these terms is made by BMJ to the Submitting Author unless you are acting as an employee on behalf of your employer or a postgraduate student of an affiliated institution which is paying any applicable article publishing charge ("APC") for Open Access articles. Where the Submitting Author wishes to make the Work available on an Open Access basis (and intends to pay the relevant APC), the terms of reuse of such Open Access shall be governed by a Creative Commons licence – details of these licences and which [Creative Commons](#) licence will apply to this Work are set out in our licence referred to above.

Other than as permitted in any relevant BMJ Author's Self Archiving Policies, I confirm this Work has not been accepted for publication elsewhere, is not being considered for publication elsewhere and does not duplicate material already published. I confirm all authors consent to publication of this Work and authorise the granting of this licence.

1  
2  
3 **Does NIH funding differ between medical specialties? A longitudinal analysis of NIH grant**  
4  
5 **data by specialty and type of grant, 2011-2020**  
6  
7  
8  
9

10 Andrew Schlafly, A.B.<sup>1</sup>⊗  
11 Ronnie A. Sebro, M.D., Ph.D.<sup>2,3,4,⊗,\*</sup>  
12

13  
14 <sup>1</sup>Perelman School of Medicine,  
15 University of Pennsylvania,  
16 3400 Civic Center Blvd,  
17 Philadelphia,  
18 PA 19104, United States  
19

20  
21 <sup>2</sup>Center for Augmented Intelligence,  
22 Mayo Clinic,  
23 4500 San Pablo Road S.,  
24 Jacksonville,  
25 FL 32224, United States  
26

27  
28 <sup>3</sup>Department of Radiology,  
29 Mayo Clinic,  
30 4500 San Pablo Road S.,  
31 Jacksonville,  
32 FL 32224, United States  
33

34  
35 <sup>4</sup>Department of Orthopedic Surgery,  
36 Mayo Clinic,  
37 4500 San Pablo Road S.,  
38 Jacksonville,  
39 FL 32224, United States  
40

41 ⊗Both authors contributed equally to this work.  
42

43  
44 \*Corresponding author:  
45 Center for Augmented Intelligence,  
46 Mayo Clinic,  
47 4500 San Pablo Road S.,  
48 Jacksonville,  
49 FL 32224, United States  
50 Email: [Sebro.Ronnie@Mayo.edu](mailto:Sebro.Ronnie@Mayo.edu)  
51  
52

53  
54 The authors have no competing interests to disclose.  
55

56 Word Count of Manuscript Text: 3518  
57

58 21  
59

## **Abstract**

**Importance:** Differences in National Institutes of Health (NIH) funding between specialties may affect research and patient outcomes in less-well-funded specialties.

**Objective:** The aim of this study is to evaluate how NIH funding has been awarded by medical specialty. This study assesses differences and trends in the amount of funding, by medical specialty, for the years of 2011 through 2020, via a retrospective analysis of data from the NIH RePORTER (Research Portfolio Online Reporting Tools Expenditures and Results).

**Data Source:** NIH RePORTER data from years 2011-2020, for awarded NIH grants (F32, T32, K01, K08, K23, R01, R03, R21, U01, P30) in the following medical specialties: Anesthesiology, Dermatology, Emergency Medicine, Family Medicine, Internal Medicine, Neurology, Neurosurgery, Obstetrics and Gynecology, Ophthalmology, Orthopedic Surgery, Otolaryngology, Pathology, Pediatrics, Physical Medicine and Rehabilitation, Plastic Surgery, Psychiatry, Radiation-Diagnostic/Oncology, Surgery, and Urology.

**Main Outcomes and Measures:** The following measures were studied: (1) number of grants by specialty, (2) number of grants per active physician in each specialty, (3) total dollar-amount of grants by specialty, (4) total dollar-amount of grants per active physician in each specialty, and (5) mean dollar-amount awarded by specialty for each grant-type. We investigated whether any of these measures varied between medical specialties.

**Results:** In general, Internal Medicine/Medicine, Psychiatry, Pediatrics, Pathology, and Neurology received the most grants per year, had the highest number of grants per active physician, had the highest total amounts of funding and the highest amount of funding per active physician, whereas fields like Emergency Medicine, Plastic Surgery, Orthopedics and Obstetrics and Gynecology had the lowest. The mean dollar-amount awarded by grant-type differed significantly between specialties ( $P < \text{Bonferroni corrected alpha} = 0.00029$ ).

**Conclusions and Relevance:** NIH funding varies significantly between medical specialties. This may affect research progress and the careers of scientists and may affect patient outcomes in less well-funded specialties.

## **Article Summary**

### **Strengths and Limitations of this Study:**

- This study compares NIH funding across all medical specialties in the publicly available NIH database and evaluates an important clinical question - whether there are differences in funding between specialties.



- 1  
2  
3  
4  
5  
6  
7  
8  
9  
10  
11  
12  
13  
14  
15  
16  
17  
18  
19  
20  
21  
22  
23  
24  
25  
26  
27  
28  
29  
30  
31  
32  
33  
34  
35  
36  
37  
38  
39  
40  
41  
42  
43  
44  
45  
46  
47  
48  
49  
50  
51  
52  
53  
54  
55  
56  
57  
58  
59  
60
- We compare several funding measures by specialty including: (1) the number of grants awarded, (2) the number of grants per active physician, (3) the total dollar-amount of grants awarded, (4) the total-dollar amount of grants awarded per active physician and (5) the mean dollar amount of each grant.
  - This study was limited because there was no data on the success rate of grant applications by specialty.
  - The NIH data did not state whether the principal investigator was a physician or not, which limits the ability to evaluate if the funding of physician researchers varied by specialty.

## **Introduction**

The United States (US) National Institutes of Health (NIH) is a part of the US Department of Health and Human Services (HHS), and is the primary agency responsible for public health and biomedical research [1]. The NIH is comprised of over 27 separate institutes and centers covering several biomedical disciplines and specialties in medicine (Appendix I) [1].

Approximately 80% of NIH funding goes towards funding extramural research in the form of research grants [1].

NIH funding is used for the advancement of research across many fields of basic science and clinical medicine [2]. In fiscal year 2020, the total NIH funding was \$40.3 billion [2]. NIH funding is spread across many medical specialties, and the number of physicians in these medical specialties vary. Assuming that the number of active physicians can be viewed as a rough approximation of the demand for a specialty and a proxy for the disease burden (diseases treated by that specialty) in society, we hypothesized that the amount of funding for each specialty would be proportional to the number of active physicians in the specialty.

We investigated whether NIH funding metrics ((1) the number of grants, (2) number of active physicians per grant in that specialty, (3) the total dollar-amount of grants, (4) total dollar-amount of grants per active physician in that specialty, and (5) the mean dollar of each grant-type) varies between specialties, and evaluated the trends in these NIH funding metrics between 2011 and 2020.

## **Methods**

1  
2  
3 This study was evaluated by the Mayo Clinic Institutional Review Board (IRB). The study  
4 involves freely available, public data, and was determined to be exempt.  
5  
6  
7  
8  
9

### 10 Patient and Public Involvement Statement

11  
12 Neither patients nor members of the public were involved, in any way, with this research.  
13  
14  
15

### 16 Study Design and Data Source

17  
18 We carried out a retrospective analysis of the NIH's Research Portfolio Online Reporting  
19 Tools Expenditures and Results (RePORTER) database (<https://reporter.nih.gov/>), which has  
20 data on grants that were awarded by the NIH [3]. Unlike the federal Query/View/Report (QVR)  
21 database, the RePORTER database shows data only for grants that were awarded and therefore  
22 does not allow for analysis of data involving grant-applications that did not result in the  
23 awarding of a grant. As a result, we could not evaluate the success-rates of grant applications by  
24 specialty.  
25  
26  
27  
28  
29  
30  
31  
32  
33  
34  
35  
36  
37

38 The RePORTER database was searched for grants awarded between 2011 and 2020, which were  
39 classified, based on the department name on the grant application, into one of the following 19  
40 specialties: Anesthesiology, Dermatology, Emergency Medicine, Family Medicine, Internal  
41 Medicine, Neurology, Neurosurgery, Obstetrics and Gynecology, Ophthalmology, Orthopedic  
42 Surgery, Otolaryngology, Pathology, Pediatrics, Physical Medicine and Rehabilitation, Plastic  
43 Surgery, Psychiatry, Radiation-Diagnostic/Oncology, Surgery, and Urology [3, 4]. These  
44 specialties were chosen because they were the medical specialties in clinical medicine available  
45 in the RePORTER database. The grants that were not classified as one of these specialties were  
46  
47  
48  
49  
50  
51  
52  
53  
54  
55  
56  
57  
58  
59  
60

1  
2  
3 excluded. We included all grants for each specialty from the RePORTER database. The grant-  
4  
5 types appearing in the data set are listed in Appendix II.  
6  
7  
8  
9

### 10 Number of active physicians

11  
12 The number of active physicians was obtained from the Physician Specialty Data Report by the  
13  
14 American Association of Medical Colleges (AAMC) [5]. The number of active physicians  
15  
16 included those from all training-pathways, including Doctor of (Allopathic) Medicine (M.D.),  
17  
18 Doctor of Osteopathic Medicine (D.O.), and international medical graduates (IMG) [5]. Because  
19  
20 the number of active physicians per specialty was only available for certain years, during the  
21  
22 time-period of 2010-2020, linear interpolation was used to estimate the number of active  
23  
24 physicians in the unlisted years (2011, 2012, 2014, 2016, 2018, and 2020) [5]. This data is shown  
25  
26  
27 in Appendix III.  
28  
29  
30  
31  
32

### 33 *(1) Number of NIH grants by specialty*

34  
35 We evaluated all grants awarded over the 10-year time period to identify the mostly frequently  
36  
37 awarded grant-types. The ten most frequently awarded grant-types were R01, R03, R21, F32,  
38  
39 T32, K01, K08, K23, U01, and P30. The titles and descriptions of these grant-types appear in  
40  
41 Appendix IV. Plots of the number of grants by specialty and the percent-change in the number of  
42  
43 grants from 2011 by specialty were created. We systematically evaluated NIH grants awarded at  
44  
45 critical periods in the academic career pipeline including training grants (pre-doctoral T32, and  
46  
47 post-doctoral F32); career development grants (K01, K08, and K23); and grants typically  
48  
49 awarded in the later/advanced career stages, including the R01, R03, R21, P30 and U01 grants.  
50  
51  
52  
53  
54  
55  
56  
57  
58  
59  
60

1  
2  
3 *(2) Number of active physicians in each specialty per grant*  
4

5 To evaluate how many active physicians existed per grant type, the total number of active  
6 physicians was divided by the total number of each grant type for each year for each specialty.  
7

8 This metric gauges how rare it is for a physician of each specialty to have any grant type.  
9  
10  
11  
12

13  
14  
15 *(3) Total dollar-amount of NIH grants awarded in each specialty*  
16

17 To evaluate whether the differences in numbers of grants resulted in differences in dollar-  
18 amounts of funding for each specialty, we calculated the total dollar-amounts of funding by  
19 specialty from 2011-2020 after adjusting for inflation [6]. The total dollar-amount of funding  
20 was calculated for each specialty for each grant type during the study period. The annual funding  
21 each year from 2012 through 2020 was converted to year-2011 dollars, using the Gross Domestic  
22 Product (GDP) Price Index for the relevant years [6]. To evaluate changes in funding over the  
23 time-period studied, for each year after 2011, we calculated the percent-change in the dollar-  
24 amount of funding after adjusting for inflation (compared to 2011) by specialty.  
25  
26  
27  
28  
29  
30  
31  
32  
33  
34  
35  
36  
37

38 *(4) Dollar-amount of grants per active physician*  
39

40 Because the total dollar-amount of grants may be affected by the number of researchers in that  
41 specialty and therefore the number of active physicians, we calculated the number of dollars of  
42 funding per active physician to adjust for the differing sizes of the medical specialties. We  
43 divided the dollar-amount of funding for each specialty by the number of active physicians in  
44 that specialty to calculate the dollar-amount of grants per active physician.  
45  
46  
47  
48  
49  
50  
51  
52  
53

54 *(5) Mean dollar-amount per grant for each specialty by grant-type*  
55  
56  
57

1  
2  
3 The dollar-amounts vary by grant-type, with smaller grants awarded to early-stage investigators  
4 and larger grants awarded to more seasoned investigators. We hypothesized that there should be  
5 no differences between specialties when evaluated the mean dollar-amount per grant for a given  
6 grant-type. To test this hypothesis, we calculated the mean and standard deviation of the  
7  
8  
9  
10  
11  
12  
13  
14  
15  
16  
17  
18  
19  
20  
21  
22  
23  
24  
25  
26  
27  
28  
29  
30  
31  
32  
33  
34  
35  
36  
37  
38  
39  
40  
41  
42  
43  
44  
45  
46  
47  
48  
49  
50  
51  
52  
53  
54  
55  
56  
57  
58  
59  
60

All analyses were performed in Excel, version 2107 (Microsoft, Redmond, Washington, USA) and R, version 4.1.2 (R Foundation for Statistical Computing, Vienna, Austria). Qualitative variables were compared between specialties using Chi-squared tests, while quantitative variables were compared between specialties using t-tests with unequal variances. All test-statistics were two-sided. To control for false-positive findings due to multiple comparisons between specialties, we used the Bonferroni-adjusted Type I error rate of  $\frac{0.05}{\binom{19}{2}} = 0.0002924$ , so that P-values less than this Bonferroni-adjusted Type I error rate were considered statistically significant.

## **Results**

### *(1) Number of grants*

From 2011 through 2020, there were 184,382 grants awarded by the NIH in the specialties considered. Internal Medicine/Medicine, 72,205 (37.2%); Psychiatry, 19,029 (10.3%); Pediatrics, 17,422 (9.4%); and Pathology, 14,946 (8.1%), were the specialties that received the most NIH grants (Table 1). In comparison, Plastic Surgery, 16 grants (0.009%); Emergency Medicine, 1258 (0.7%); Family Medicine, 2015 (1.1%); and Neurosurgery, 2956 (1.6%), were the specialties that received the fewest NIH grants (Table 1).

**Table 1: NIH funding per active physician by specialty, 2011-2020**

| Specialty                         | Rank<br>(based on<br>average<br>dollars of<br>funding<br>per active<br>physician<br>per year) | Number of<br>grants | Percentage of<br>total<br>grant<br>s<br>awar<br>ded | Average<br>numb<br>er of<br>grants<br>per<br>active<br>physic<br>ian | Dollar<br>s of<br>fundin<br>g (K,<br>round<br>ed to<br>MM) | Percentage<br>of<br>total | Average<br>number<br>of active<br>physicia<br>ns,<br>2011-<br>2020 | Average<br>dollars of<br>funding<br>per<br>active<br>physician<br>per year<br>(K) |
|-----------------------------------|-----------------------------------------------------------------------------------------------|---------------------|-----------------------------------------------------|----------------------------------------------------------------------|------------------------------------------------------------|---------------------------|--------------------------------------------------------------------|-----------------------------------------------------------------------------------|
| Pathology                         | 1                                                                                             | 14,946              | 8.1                                                 | 0.112                                                                | 6366.7                                                     | 7.6                       | 13,311                                                             | 47.8                                                                              |
| Neurology                         | 2                                                                                             | 12,448              | 6.8                                                 | 0.092                                                                | 6001.6                                                     | 7.2                       | 13,539                                                             | 44.3                                                                              |
| Internal<br>Medicine/Med<br>icine | 3                                                                                             | 72,205              | 39.2                                                | 0.063                                                                | 36022.<br>6                                                | 43.2                      | 114,639                                                            | 31.4                                                                              |
| Psychiatry                        | 4                                                                                             | 19,029              | 10.3                                                | 0.050                                                                | 8267.6                                                     | 9.9                       | 38,089                                                             | 21.7                                                                              |
| Neurosurgery                      | 5                                                                                             | 2,956               | 1.6                                                 | 0.055                                                                | 1111.6                                                     | 1.3                       | 5,410                                                              | 20.5                                                                              |
| Pediatrics                        | 6                                                                                             | 17,422              | 9.4                                                 | 0.030                                                                | 7896.5                                                     | 9.5                       | 57,967                                                             | 13.6                                                                              |
| Ophthalmolog<br>y                 | 7                                                                                             | 5,957               | 3.2                                                 | 0.032                                                                | 2380.8                                                     | 2.9                       | 18,684                                                             | 12.7                                                                              |
| Surgery                           | 8                                                                                             | 8,171               | 4.4                                                 | 0.032                                                                | 3212.5                                                     | 3.9                       | 25,378                                                             | 12.7                                                                              |

|                                       |    |               |            |       |               |            |                |            |
|---------------------------------------|----|---------------|------------|-------|---------------|------------|----------------|------------|
| Otolaryngolog<br>y                    | 9  | 3,198         | 1.7        | 0.034 | 110.23        | 1.3        | 9,485          | 11.6       |
| Radiation-<br>Diagnostic/On<br>cology | 10 | 9,562         | 5.2        | 0.025 | 3999.4        | 4.8        | 38,702         | 10.3       |
| Dermatology                           | 11 | 2,270         | 1.2        | 0.019 | 764.5         | 0.9        | 11,803         | 6.5        |
| Urology                               | 12 | 1,474         | 0.8        | 0.015 | 572.7         | 0.7        | 9,922          | 5.8        |
| Obstetrics &<br>Gynecology            | 13 | 4,343         | 2.4        | 0.010 | 1697.8        | 2          | 41,552         | 4.1        |
| Physical<br>Medicine &<br>Rehab       | 14 | 1,124         | 0.6        | 0.012 | 357.9         | 0.4        | 9,220          | 3.9        |
| Orthopedics                           | 15 | 2,218         | 1.2        | 0.012 | 750.2         | 0.9        | 19,222         | 3.9        |
| Anesthesiolog<br>y                    | 16 | 3,770         | 2          |       | 1434.7        | 1.7        | 41,391         | 3.5        |
| Emergency<br>Medicine                 | 17 | 1,258         | 0.7        |       | 550.2         | 0.7        | 40,395         | 1.4        |
| Family<br>Medicine                    | 18 | 2,015         | 1.1        |       | 848.5         | 1.0        | 112,396        | 0.8        |
| Plastic Surgery                       | 19 | 16            | 0.0        |       | 4.6           | 0.0        | 7,079          | 0.1        |
| <b>Total</b>                          | -  | <b>18,438</b> | <b>100</b> |       | <b>83342.</b> | <b>100</b> | <b>627,782</b> | <b>133</b> |
|                                       |    | <b>2</b>      |            |       | <b>9</b>      |            |                |            |



Internal Medicine/Medicine received the greatest number of grants, in aggregate over the time period from 2011 through 2020, followed by Psychiatry, Pediatrics, Pathology, and Neurology (Supplementary Figures 1a and 1b). Internal Medicine/Medicine consistently received the greatest number of grants during the study.

The average percentage-change in the number of grants by specialty from 2012-2020 compared to the initial year (2011), was highest for Emergency Medicine (40.8%), Neurosurgery (34.2%), and Orthopedics (32.2%) (Supplementary Figure 2). The average percentage-change was lowest for Plastic Surgery (-51.9%), Otolaryngology (-36.8%) and Radiation-Diagnostic/Oncology (-24.5%) (Supplementary Figure 2).

Table 2 shows the number of the most-commonly awarded grant-types for each specialty, and shows R01 and R21 were the most commonly awarded grant-types. The numbers of the most commonly awarded NIH training grants (F32, T32) (Supplementary Table 1), NIH career development grants (K01, K08, K23) (Supplementary Table 2), and NIH advanced career grants (R01, R03, R21, P30 and U01) (Supplementary Table 3) are shown for each year.

**Table 2: Total number of NIH grants awarded by specialty and grant-type aggregated from 2011 through 2020**

|           | Training Grants |     | Career Development Grants |     |     | Advanced Career Grants |     |     |     |     |
|-----------|-----------------|-----|---------------------------|-----|-----|------------------------|-----|-----|-----|-----|
| Specialty | F32             | T32 | K01                       | K08 | K23 | R01                    | R03 | R21 | P30 | U01 |

|                                       |      |      |      |      |      |       |      |      |      |      |
|---------------------------------------|------|------|------|------|------|-------|------|------|------|------|
| Anesthesiology                        | 43   | 178  | 53   | 167  | 126  | 2,258 | 63   | 289  | 1    | 111  |
| Dermatology                           | 32   | 105  | 73   | 146  | 49   | 1,169 | 54   | 182  | 82   | 65   |
| Emergency<br>Medicine                 | 4    | 9    | 9    | 58   | 171  | 415   | 27   | 58   | 0    | 89   |
| Family Medicine                       | 2    | 51   | 97   | 27   | 59   | 787   | 56   | 174  | 30   | 131  |
| Internal<br>Medicine/Medicine         | 1,16 | 3,69 | 1,46 | 2,53 | 2,79 | 30,80 | 1,14 | 3,82 | 3,12 | 4,51 |
| Neurology                             | 235  | 340  | 175  | 352  | 529  | 5,769 | 129  | 791  | 181  | 577  |
| Neurosurgery                          | 96   | 46   | 16   | 101  | 44   | 1,669 | 47   | 272  | 18   | 129  |
| Obstetrics &<br>Gynecology            | 46   | 107  | 48   | 55   | 103  | 1,620 | 119  | 286  | 41   | 137  |
| Ophthalmology                         | 83   | 204  | 7    | 268  | 166  | 3,823 | 15   | 327  | 303  | 67   |
| Orthopedics                           | 60   | 76   | 62   | 48   | 26   | 1,349 | 83   | 215  | 49   | 7    |
| Otolaryngology                        | 86   | 157  | 9    | 112  | 100  | 1,642 | 118  | 225  | 118  | 38   |
| Pathology                             | 201  | 718  | 148  | 306  | 21   | 8,110 | 197  | 1282 | 206  | 390  |
| Pediatrics                            | 194  | 865  | 208  | 1,00 | 924  | 7,467 | 362  | 1,14 | 186  | 1,16 |
|                                       |      |      |      | 7    |      |       |      | 6    |      | 1    |
| Physical Medicine<br>& Rehabilitation | 17   | 46   | 80   | 6    | 68   | 443   | 58   | 89   | 0    | 51   |
| Plastic Surgery                       | 1    | 0    | 0    | 0    | 0    | 7     | 2    | 0    | 0    | 3    |
| Psychiatry                            | 293  | 772  | 743  | 250  | 1,06 | 9,066 | 236  | 1,58 | 133  | 825  |
|                                       |      |      |      |      | 0    |       |      | 0    |      |      |

|                                   |     |     |     |     |     |       |     |       |     |     |
|-----------------------------------|-----|-----|-----|-----|-----|-------|-----|-------|-----|-----|
| Radiation-<br>Diagnostic/Oncology | 65  | 266 | 147 | 66  | 36  | 5,424 | 145 | 1,062 | 81  | 342 |
| Surgery                           | 172 | 532 | 92  | 464 | 106 | 3,975 | 174 | 540   | 300 | 536 |
| Urology                           | 22  | 55  | 33  | 63  | 22  | 686   | 27  | 83    | 39  | 160 |

(2) Number of active physicians per grant:

More F32 grants were awarded in Neurology, Internal Medicine/Medicine and Pathology than in Emergency Medicine. A F32 training grant was awarded for every 428-1,304 Neurologists, for every 875-1113 Internal Medicine/Medicine physicians and for every 523-973 Pathologists (Supplementary Table 4). However, a F32 training grant was only awarded for every 33,984-45,202 Emergency Medicine physicians. T32 grants were also more commonly awarded in Neurology, Internal Medicine/Medicine and Pathology than in Emergency Medicine. A T32 grant was awarded for every 349-462 Neurologists, every 256-337 Internal Medicine/Medicine physician, every 144-230 Pathologists and every 21,174 -40,974 Emergency Medicine physician (Supplementary Table 4).

Career development grants (K01, K08, and K23) were more frequently awarded in Internal Medicine/Medicine, Neurology, and Pathology as these specialties consistently had the lowest numbers of physicians per awarded grant (Supplementary Table 5) while Emergency Medicine, Family Medicine and Radiation-Oncology/Diagnostic had the highest numbers of physicians per career development grant.

1  
2  
3 For the advanced career researcher grants (R01, R03, R21, P30, U01), Internal  
4  
5 Medicine/Medicine, Neurology, and Pathology consistently had the lowest numbers of  
6  
7 physicians per awarded grant (Supplementary Table 6). There was a R01 grant awarded for  
8  
9 every 34-41 Internal Medicine/Medicine physicians, for every 20-25 Neurologists, and for every  
10  
11 15-17 Pathologists, while there was a R01 grant awarded for every 2,274-7,317 Plastic Surgeons,  
12  
13 and for every 1,194-1,622 Family Medicine physicians.  
14  
15

16  
17 U01 grants were more commonly awarded in Internal Medicine/Medicine, and Neurology, and  
18  
19 least commonly awarded in Orthopedics, and Family Medicine. A U01 grant was awarded for  
20  
21 every 204-295 Internal Medicine/Medicine physicians, for every 174-391 Neurologists, for every  
22  
23 9629-19374 Orthopedists, and for every 7,420-11,820 Family Medicine physicians.  
24  
25

26 (3) Dollar-amount of grants: The total dollar-amount of funding awarded from 2011 to 2020 was  
27  
28 \$83,342 MM USD (\$1 MM USD is 1 million United States Dollars). Of this total, the specialties  
29  
30 receiving the largest total amounts of funding were Internal Medicine/Medicine (\$36,023MM  
31  
32 (43.2%)), Psychiatry (\$8,268MM (9.9%)), and Pediatrics (\$7,897MM (9.5%)). The specialties  
33  
34 receiving the least funding were Plastic Surgery (\$4.6MM (<0.1%)), Physical Medicine & Rehab  
35  
36 (\$358MM (0.4%)), and Emergency Medicine (\$550MM (0.7%)) (Table 1). Internal  
37  
38 Medicine/Medicine was consistently the most-funded specialty, after adjusting for inflation  
39  
40 (Figure 1a), and after adjusting for both inflation and the number of active physicians per  
41  
42 specialty (Figure 1b). Physical Medicine and Rehabilitation had the largest average percent-  
43  
44 increase in the inflation-adjusted amount of funding compared to the baseline year of 2011 of the  
45  
46 specialties considered (Figure 2).  
47  
48  
49  
50  
51  
52  
53  
54  
55  
56  
57  
58  
59  
60

1  
2  
3 The dollar-amount of funding for each specialty for the NIH training grants (F32, T32) from  
4 2011-2020 is shown in Supplementary Table 7. Emergency Medicine, Family Medicine, and  
5  
6 Plastic Surgery had the least amount of funding for these NIH training grants. For the NIH career  
7  
8 development grants, we found that Emergency Medicine and Family Medicine were also among  
9  
10 the least funded (Supplementary Table 8). Finally, we found that most of the more advanced  
11  
12 career NIH grants were in Internal Medicine/Medicine (Supplementary Table 9).  
13  
14  
15

16  
17  
18  
19 (4) Dollar-amount of grants per active physician: Pathology (\$47.8K/year) and Neurology  
20  
21 (\$44.3K/year) had the highest amounts of funding per physician over 2011-2020 (Table 1), and  
22  
23 in each of the ten years studied (Figure 1b). Both Internal Medicine/Medicine and Neurology  
24  
25 were among the highest-funded per active physician for many of the grant-types studied. For  
26  
27 instance, for NIH T32 training grants, Internal Medicine/Medicine, Neurology, Pathology, and  
28  
29 Psychiatry had the highest amounts of funding per physician (Supplementary Table 10).  
30  
31 Likewise, Internal Medicine/Medicine, Neurology, Neurosurgery, and Pathology had the highest  
32  
33 amounts of F32 funding per physician (Supplementary Table 10). Internal Medicine/Medicine,  
34  
35 Neurology, Pathology, and Psychiatry had the highest amounts of K01 and K08 funding per  
36  
37 physician (Supplementary Table 11). Internal Medicine/Medicine, Neurology, Pediatrics, and  
38  
39 Psychiatry had the highest amounts of K23 funding per active physician (Supplementary Table  
40  
41 11). Internal Medicine/Medicine, Neurology, Neurosurgery, and Psychiatry, had the highest  
42  
43 amounts of R01 and U01 funding per physician (Supplementary Table 12).  
44  
45  
46  
47  
48  
49  
50

51 *(5) Mean dollar-amount per grant for each specialty by grant-type*  
52  
53  
54  
55  
56  
57

1  
2  
3 We compared the mean dollar-amount of each grant for each grant type between specialties to  
4 assess whether the amount of funding varies between specialties. We found that the mean dollar-  
5 amount of the NIH training grants (Supplementary Table 13) varied between specialties  
6  
7 (Supplementary Figure 3 and Supplementary Figure 4). Pathology, Psychiatry and Neurology  
8 had significantly different F32 funding than Physical Medicine and Rehab ( $P<0.0002924$ ); and  
9  
10 Urology, Ophthalmology, Dermatology, Surgery, Orthopedics and Otolaryngology had  
11 significantly different T32 funding than Pathology ( $P<0.0002924$ ). The mean dollar-amount of  
12 the NIH career development grants (Supplementary Table 14) varied between specialties.  
13  
14 Significant variation in mean K01 funding (Supplementary Figure 5), mean K08 funding  
15 (Supplementary Figure 6) and K23 funding (Supplementary Figure 7) was noted. For example,  
16 the mean K01 funding for Dermatology was statistically significantly different from that for  
17 Physical Medicine and Rehabilitation, Psychiatry, Neurology, Urology, Anesthesiology,  
18  
19 Obstetrics and Gynecology, Radiology, Family Medicine, Pathology, Pediatrics, Otolaryngology,  
20 and Internal Medicine/Medicine. The mean dollar-amount of the NIH advanced career grants  
21 (Supplementary Table 15) varied between specialties (Supplementary Figures 8-12). Psychiatry  
22 had significantly different R01 funding than all other specialties except Plastic Surgery, Family  
23  
24 Medicine and Emergency Medicine ( $P<0.0002924$ ).  
25  
26  
27  
28  
29  
30  
31  
32  
33  
34  
35  
36  
37  
38  
39  
40  
41  
42  
43  
44

## 45 **Discussion**

46 The data show that the number of NIH grants awarded over the investigated period varied  
47 substantially across specialties. Internal Medicine/Medicine consistently received the greatest  
48 number of grants followed by Psychiatry, Pediatrics, Pathology and Neurology. After adjusting  
49 for the number of active physicians in each specialty, we find that Neurology, Internal  
50  
51  
52  
53  
54  
55  
56  
57

1  
2  
3 Medicine/Medicine and Pathology were the specialties with the greatest number of grants per  
4 active physician, while Emergency Medicine, Family Medicine and Plastic Surgery were the  
5 fields with the fewest number of grants per active physician, and this pattern was consistent  
6 across training grants, career development grants and advanced career grants. We found that  
7 Internal Medicine/Medicine had the greatest dollar amount of funding of all medical specialties.  
8  
9 After we adjusted the dollar amount of funding by the number of active physicians in each  
10 specialty, we found that Pathology, Neurology, Internal Medicine/Medicine, and Psychiatry were  
11 the specialties with the highest levels of funding per active physician, and Plastic Surgery,  
12 Family Medicine, Emergency Medicine, and Anesthesiology were the specialties with the lowest  
13 levels of funding per active physician. When we analyzed the mean amount of funding for each  
14 grant-type, we found significant funding-amount differences between specialties.  
15  
16  
17  
18  
19  
20  
21  
22  
23  
24  
25  
26  
27  
28  
29  
30

31 Our results have tremendous clinical and biomedical ramifications. We show that there are  
32 differences in the amount of funding, the amount of funding adjusted for the number of  
33 physicians, the dollar amount of NIH funding adjusted for the number of physicians, and  
34 differences in the funding-amount for each grant-type between specialties. It is unclear why these  
35 differences exist.  
36  
37  
38  
39  
40  
41  
42  
43  
44

45 One speculation is that some of the better funded specialties (Internal Medicine/Medicine,  
46 Neurology, Pathology) are more closely aligned with the NIH mission than other specialties,  
47 however the NIH's mission is "To seek fundamental knowledge about the nature and behavior of  
48 living systems and the application of that knowledge to enhance health, lengthen life, and reduce  
49 illness and disability." (<https://www.nih.gov/about-nih/what-we-do/nih-almanac/about-nih>),  
50  
51  
52  
53  
54  
55  
56  
57

1  
2  
3 which is largely applicable to all medical specialties. Another speculation is that the better  
4 funded specialties are intrinsically better than the less funded specialties at doing research, and in  
5 having a pipeline of training grants, career development grants and this has resulted in the  
6 discrepancies that we have noted. One may speculate that a better funded specialty at the training  
7 and career-development levels may result in that specialty being better funded status at the more  
8 advanced research career levels.  
9

10  
11  
12 The differences in research-funding between specialties have likely already had  
13 significant consequences for future progress in research. It has been shown that the proportion of  
14 individuals with M.D./Ph.D.'s who spend at least 50% of their time on research differs markedly  
15 by specialty [7]. We note that the three specialties that were most highly funded, on a per-  
16 physician basis (Pathology, Neurology, and Internal Medicine/Medicine) in our study were noted  
17 to have higher proportions of individuals spending at least 50% of their time on research, while  
18 Family Medicine and Emergency Medicine (which were among the lowest-funded in our study)  
19 had much lower proportions of faculty with more than 50% time dedicated to research [8, 9].  
20  
21  
22  
23  
24  
25  
26  
27  
28  
29  
30  
31  
32  
33  
34  
35  
36  
37  
38  
39

40 Whether specialty-choice is a driver of subsequent research-focus in physicians' careers is  
41 unknown; however, it is easy to speculate that greater availability of NIH funding in certain  
42 specialties may facilitate research-focused careers in those specialties. The specialties of internal  
43 medicine, pathology, pediatrics, and neurology together accounted for approximately 60% of the  
44 specialties in which Medical Scientist Training Program (MSTP) M.D./Ph.D. graduates attended  
45 residency programs [8, 9]. Three of these specialties were the three specialties with the highest  
46 amount of NIH funding per active physician. The temporal trend is difficult to assess, and it is  
47  
48  
49  
50  
51  
52  
53  
54  
55  
56  
57



1  
2  
3 unclear which is the cause and which is the effect. MD-PhD program graduates were more likely  
4 to choose specialties like Pathology, and less likely to choose Emergency Medicine, or Family  
5 Medicine [10]. MSTP graduates may be more attracted to these better funded specialties because  
6 of increased NIH funding per active physician, or alternatively MSTP graduates in these better  
7 funded specialties were able to acquire more NIH funding per active physician.  
8  
9

10  
11  
12  
13  
14  
15  
16  
17 However, the distribution of specialties pursued by MSTP graduates has changed over time, and  
18 many specialties now have substantial representation [7], which means a larger proportion of  
19 these MSTP graduates are in less well funded specialties. The presence of substantial numbers of  
20 M.D./Ph.D.'s in specialties with lower levels of funding (e.g., the 12.9% of M.D./Ph.D.'s in  
21 Pediatrics, the 7.0% in Surgical specialties, and the 4.2% in Radiation-Diagnostic/Oncology)  
22 leaves the possibility of a mismatch between the supply of such well-trained physician-scientists,  
23 and the amount of funding available to them, which could lead to increased competition for  
24 research-grants in these specialties, and increased attrition, ultimately further exacerbating the  
25 relatively lower levels of research in these specialties [7]. This problem is not unique to  
26 M.D./Ph.D.'s and physicians, and may occur for nurses, nurse practitioners, public health  
27 scientists, social workers, engineers, Pharmacists, Ph.D.'s, and other biomedical research  
28 professionals who do research in one of the less funded specialties.  
29  
30  
31  
32  
33  
34  
35  
36  
37  
38  
39  
40  
41  
42  
43  
44  
45  
46

47 The importance of having a diverse biomedical workforce has been stressed. Diversity in  
48 race/ethnicity and gender have been at the forefront of these discussions because of the  
49 tremendous health disparities that exist across races/ethnicities and genders. However, this  
50 research shows that there are disparities in funding based on physician specialty. The current  
51  
52  
53  
54  
55  
56  
57

1  
2  
3 status quo makes some specialties (better NIH-funded specialties) more attractive to physician-  
4 researchers. However, the inequity in NIH-funding may create significant societal problems. For  
5  
6  
7  
8 example, one of the worst instances of healthcare inequalities in the United States is the  
9  
10 inequality seen in the difference between Black and White maternal mortality [11]. The mortality  
11  
12 rate for non-Hispanic Black women was 3.55 times that of non-Hispanic White women [11].  
13  
14 Here, our data shows that Obstetrics and Gynecology was one of the worst NIH-funded  
15  
16 specialties. Further research is required to understand the etiology of this disparity so that the  
17  
18 NIH research dollars are appropriately distributed among all specialties.  
19  
20  
21  
22  
23

24 This study has a few limitations. We assumed that the size of the active physician workforce was  
25  
26 a proxy for the relative amount of clinical/public health need for given medical specialty.  
27  
28 However, deviations from proportionality may arise if the diseases treated by certain specialties  
29  
30 result in greater morbidity/mortality or cost to society and if the NIH funding depends on  
31  
32 morbidity/mortality or cost to society. There are several non-physician researchers including  
33  
34 Ph.D.'s, individuals with degrees in public health, nursing, social work, pharmacy, or  
35  
36 engineering who are funded by the NIH. These non-MD researchers may be more likely to be  
37  
38 hired in some specialties, and as a result, change the funding landscape of those specialties. The  
39  
40 categorization of grants into specialties was done by the NIH. The NIH did not provide the  
41  
42 training-backgrounds of the principal investigators (PIs). The NIH did not provide information  
43  
44 on whether the PIs were clinicians, and therefore we could not determine whether the  
45  
46 categorization was based on the specialty in which these PI was clinically practicing, or if  
47  
48 categorization was based on the clinical department that the PI was affiliated with. The analyses  
49  
50 in this study were based only on grants that were awarded and did not include any data for grant-  
51  
52  
53  
54  
55  
56  
57  
58  
59  
60

1  
2  
3 applications which were rejected to assess differences in funding rates. The grant-application  
4 data is not included in the RePORTER database and can only be accessed through an internal  
5 database at the NIH and was unavailable for this study. Finally, the study was limited to only the  
6 principal investigator, and did not investigate the specialties of the co-investigators since this  
7 data was not available in the RePORTER database.  
8  
9  
10  
11  
12  
13  
14  
15  
16

17 In conclusion, the number of NIH grants, total dollar amount of funding, dollar amount of  
18 funding per active physician, and the mean funding-amount per grant (by grant-type) vary by  
19 specialty. This may affect research progress and the careers of scientists and may affect patient  
20 outcomes in these less well-funded specialties. Further research is required to understand why  
21 this discrepancy exists.  
22  
23  
24  
25  
26  
27  
28  
29  
30  
31  
32  
33  
34  
35  
36  
37  
38  
39  
40  
41  
42  
43  
44  
45  
46  
47  
48  
49  
50  
51  
52  
53  
54  
55  
56  
57  
58  
59  
60

## **Figures and Tables**

Table 1: Number of grants, number of grants per active physician, dollars of funding, and dollars of funding per active physician from 2011-2020 by specialty

Table 2: Number of each grant-type from 2011-2020

Figure 1a – Inflation-adjusted Dollar-amount of grant-funding by specialty

Figure 1b – Inflation-adjusted Dollar-amount of grant-funding adjusted by the number of active physicians

Figure 2: Percent change in inflation-adjusted dollar-amount of grant-funding from 2011-2020 by specialty

## **Supplemental Figures and Tables**

Supplementary Table 1: Number of NIH training grants (F32, T32) awarded from 2011-2020 by specialty

Supplementary Table 2: Number of NIH career development grants (K01, K08, K23) awarded from 2011-2020 by specialty

Supplementary Table 3: Number of NIH advanced career grants (R01, R03, R21, P30, U01) awarded from 2011-2020 by specialty

Supplementary Table 4: Number of active physicians per awarded NIH training grant (F32, T32) from 2011-2020 by specialty

Supplementary Table 5: Number of active physicians per awarded NIH career development grant (K01, K08, K23) from 2011-2020 by specialty

Supplementary Table 6: Number of active physicians per awarded NIH advanced career grant (R01, R03, R21, P30, U01) from 2011-2020 by specialty

1  
2  
3 Supplementary Table 7: Total NIH training grant (F32, T32) funding in thousands of dollars  
4 from 2011-2020 by specialty

5  
6  
7  
8 Supplementary Table 8: Total NIH career development grant (K01, K08, K23) funding in  
9 thousands of dollars from 2011-2020 by specialty

10  
11  
12 Supplementary Table 9: Total NIH advanced career grant (R01, R03, R21, P30, U01) funding in  
13 thousands of dollars from 2011-2020 by specialty

14  
15  
16  
17 Supplementary Table 10: Dollar amount for each NIH training grant (F32, T32) spent per active  
18 physician from 2011-2020 by specialty

19  
20  
21  
22 Supplementary Table 11: Dollar amount for each NIH career development grant (F32, T32)  
23 spent per active physician from 2011-2020 by specialty

24  
25  
26  
27 Supplementary Table 12: Dollar amount for each NIH advanced career grant (R01, R03, R21,  
28 P30, U01) spent per active physician from 2011-2020 by specialty

29  
30  
31  
32 Supplementary Table 13: Mean NIH training grant (F32, T32) funding amount from 2011-2020  
33 by specialty

34  
35  
36  
37 Supplementary Table 14: Mean NIH career development grant (K01, K08, K23) funding amount  
38 from 2011-2020 by specialty

39  
40  
41  
42 Supplementary Table 15: Mean NIH advanced career grant (R01, R03, R21, P30, U01) funding  
43 amount from 2011-2020 by specialty

44  
45 Supplementary Figure 1a: Number of Grants from 2011 to 2020 by specialty

46  
47 Supplementary Figure 1b: Number of Grants from 2011 to 2020 by specialty (excluding Internal  
48 Medicine/Medicine)

49  
50  
51 Supplementary Figure 2: Percent-Change in Number of Grants (compared to 2011) by specialty

52  
53  
54 Supplementary Figure 3: P-values comparing mean F32 funding amount by specialty

1  
2  
3 Supplementary Figure 3 caption:

4 Red –  $P < 0.0002924$ ; Yellow –  $0.0002924 \leq P < 0.05$ ; Green –  $P \geq 0.05$ ; Gray – Insufficient data  
5  
6  
7  
8 for comparison

9  
10 Supplementary Figure 4: P-values comparing mean T32 funding amount by specialty

11  
12 Supplementary Figure 4 caption:

13 Red –  $P < 0.0002924$ ; Yellow –  $0.0002924 \leq P < 0.05$ ; Green –  $P \geq 0.05$ ; Gray – Insufficient data  
14  
15  
16  
17 for comparison

18  
19 Supplementary Figure 5: P-values comparing mean K01 funding amount by specialty

20  
21  
22 Supplementary Figure 5 caption:

23 Red –  $P < 0.0002924$ ; Yellow –  $0.0002924 \leq P < 0.05$ ; Green –  $P \geq 0.05$ ; Gray – Insufficient data  
24  
25  
26  
27 for comparison

28  
29 Supplementary Figure 6: P-values comparing mean K08 funding amount by specialty

30  
31  
32 Supplementary Figure 6 caption:

33 Red –  $P < 0.0002924$ ; Yellow –  $0.0002924 \leq P < 0.05$ ; Green –  $P \geq 0.05$ ; Gray – Insufficient data  
34  
35  
36  
37 for comparison

38  
39 Supplementary Figure 7: P-values comparing mean K23 funding amount by specialty

40  
41  
42 Supplementary Figure 7 caption:

43 Red –  $P < 0.0002924$ ; Yellow –  $0.0002924 \leq P < 0.05$ ; Green –  $P \geq 0.05$ ; Gray – Insufficient data  
44  
45  
46  
47 for comparison

48  
49 Supplementary Figure 8: P-values comparing mean R01 funding amount by specialty

50  
51  
52 Supplementary Figure 8 caption:

53 Red –  $P < 0.0002924$ ; Yellow –  $0.0002924 \leq P < 0.05$ ; Green –  $P \geq 0.05$ ; Gray – Insufficient data  
54  
55  
56  
57 for comparison

58 22

1  
2  
3 Supplementary Figure 9: P-values comparing mean R03 funding amount by specialty

4  
5 Supplementary Figure 9 caption:

6  
7 Red –  $P < 0.0002924$ ; Yellow –  $0.0002924 \leq P < 0.05$ ; Green –  $P \geq 0.05$ ; Gray – Insufficient data  
8  
9 for comparison

10  
11  
12 Supplementary Figure 10: P-values comparing mean R21 funding amount by specialty

13  
14 Supplementary Figure 10 caption:

15  
16 Red –  $P < 0.0002924$ ; Yellow –  $0.0002924 \leq P < 0.05$ ; Green –  $P \geq 0.05$ ; Gray – Insufficient data  
17  
18 for comparison

19  
20  
21 Supplementary Figure 11: P-values comparing mean P30 funding amount by specialty

22  
23 Supplementary Figure 11 caption:

24  
25 Red –  $P < 0.0002924$ ; Yellow –  $0.0002924 \leq P < 0.05$ ; Green –  $P \geq 0.05$ ; Gray – Insufficient data  
26  
27 for comparison

28  
29  
30  
31 Supplementary Figure 12: P-values comparing mean U01 funding amount by specialty

32  
33 Supplementary Figure 12 caption:

34  
35 Red –  $P < 0.0002924$ ; Yellow –  $0.0002924 \leq P < 0.05$ ; Green –  $P \geq 0.05$ ; Gray – Insufficient data  
36  
37 for comparison

1  
2  
3 **Contributorship Statement:** AS and RS analyzed the data and drafted and revised the paper.

4  
5 Both authors contributed equally to this work.

6  
7  
8 **Competing Interests:** The authors have no competing interests to disclose.

9  
10 **Funding Statement:** This research received no specific grant from any funding agency in the  
11 public, commercial or not-for-profit sectors.

12  
13  
14 **Data-Sharing Statement:** Data are available in a public, open access repository.

15  
16  
17 **Ethics Statement:** This study was evaluated by the local Institutional Review Board (IRB). The  
18 study involves freely available, public data, and was determined to be exempt.  
19  
20  
21  
22  
23  
24  
25  
26  
27  
28  
29  
30  
31  
32  
33  
34  
35  
36  
37  
38  
39  
40  
41  
42  
43  
44  
45  
46  
47  
48  
49  
50  
51  
52  
53  
54  
55  
56  
57  
58  
59  
60



## References

1. National Institutes of Health (NIH). 2021. *Budget*. [online] Available at: <https://www.nih.gov/about-nih/what-we-do/budget> [Accessed 25 August 2021].
2. Healthy Funding: The Critical Role of Investing in NIH to Boost Health and Lower Costs. Robert D. Atkinson, Information Technology & Innovation Foundation, March 25, 2019. <https://itif.org/publications/2019/03/25/healthy-funding-critical-role-investing-nih-boost-health-and-lower-costs> [dataset]
3. RePORT > RePORTER [Internet]. Reporter.nih.gov. 2021 [cited 2021 Mar 29]; Available from: <https://reporter.nih.gov/advanced-search>
4. 2020 Key Definitions, Commonly Used Acronyms, and Practice Specialties [Internet]. AAMC. 2021 [cited 2021 May 17]; Available from: <https://www.aamc.org/data-reports/workforce/interactive-data/2020-key-definitions-commonly-used-acronyms-and-practice-specialties> [dataset]
5. Number of People per Active Physician by Specialty, 2019 [Internet]. AAMC. 2021 [cited 2021 May 10]; Available from: <https://www.aamc.org/what-we-do/mission-areas/health-care/workforce-studies/interactive-data/number-people-active-physician-specialty-2019> [dataset]
6. Gross Domestic Product Price Index, 2022 [Internet]. NIH Office of Budget. 2022 [cited 2022 June 16]; Available from: <https://officeofbudget.od.nih.gov/gbipriceindexes.html>
7. Akabas MH, Brass LF. The national MD-PhD program outcomes study: Relationships between medical specialty, training duration, research effort, and career paths. *JCI Insight*. 2019;4(19):133009.

1  
2  
3 8. Akabas MH, Brass LF. The national MD-PhD program outcomes study: Outcomes variation  
4 by sex, race, and ethnicity. *JCI Insight*. 2019;4(19):133010.  
5

6  
7  
8 9. Brass LF, Akabas MH, Burnley LD, Engman DM, Wiley CA, Andersen OS. Are MD-PhD  
9 programs meeting their goals? An analysis of career choices made by graduates of 24 MD-PhD  
10 programs. *Acad Med*. 2010;85(4):692-701. doi:10.1097/ACM.0b013e3181d3ca17  
11  
12

13  
14 10. Andriole DA, Whelan AJ, Jeffe DB. Characteristics and career intentions of the emerging  
15 MD/PhD workforce. *JAMA*. 2008 Sep 10;300(10):1165-73. doi: 10.1001/jama.300.10.1165.  
16  
17 PMID: 18780845.  
18

19  
20  
21 11. MacDorman MF, Thoma M, Declercq E, Howell EA. Racial and Ethnic Disparities in  
22 Maternal Mortality in the United States Using Enhanced Vital Records, 2016–2017. *Am J Public*  
23  
24  
25  
26  
27  
28  
29  
30  
31  
32  
33  
34  
35  
36  
37  
38  
39  
40  
41  
42  
43  
44  
45  
46  
47  
48  
49  
50  
51  
52  
53  
54  
55  
56  
57  
58  
59  
60

PMID: 34383557; PMCID: PMC8563010.

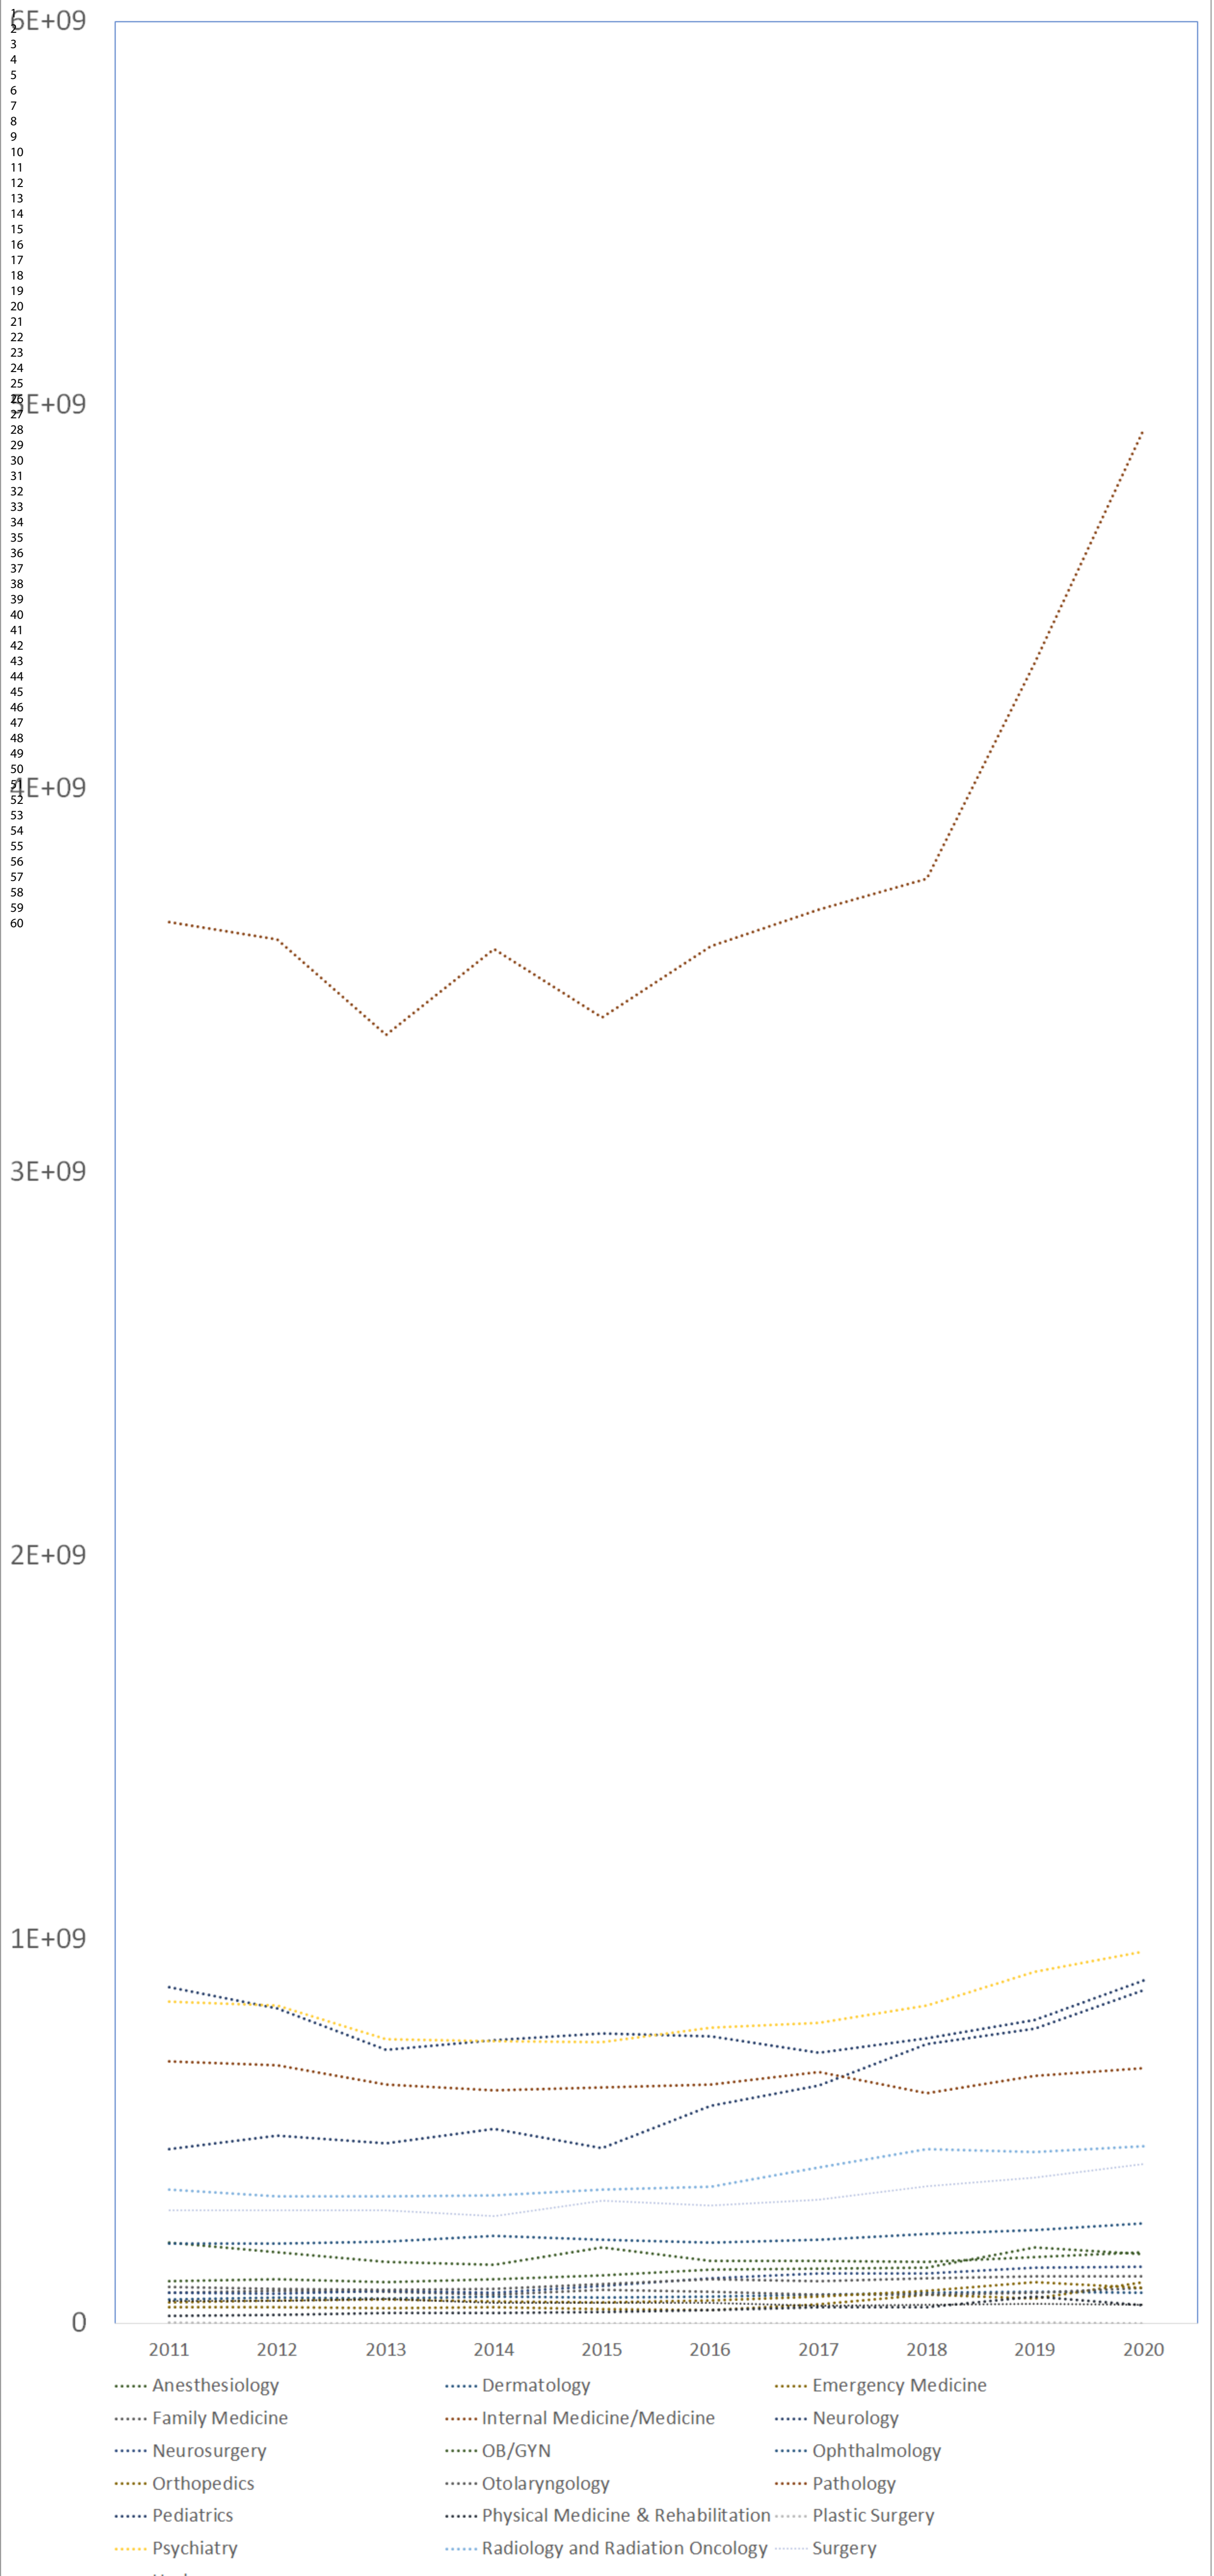

Inflation-Adjusted Dollars of Funding per Active Physician, per Year, by Specialty

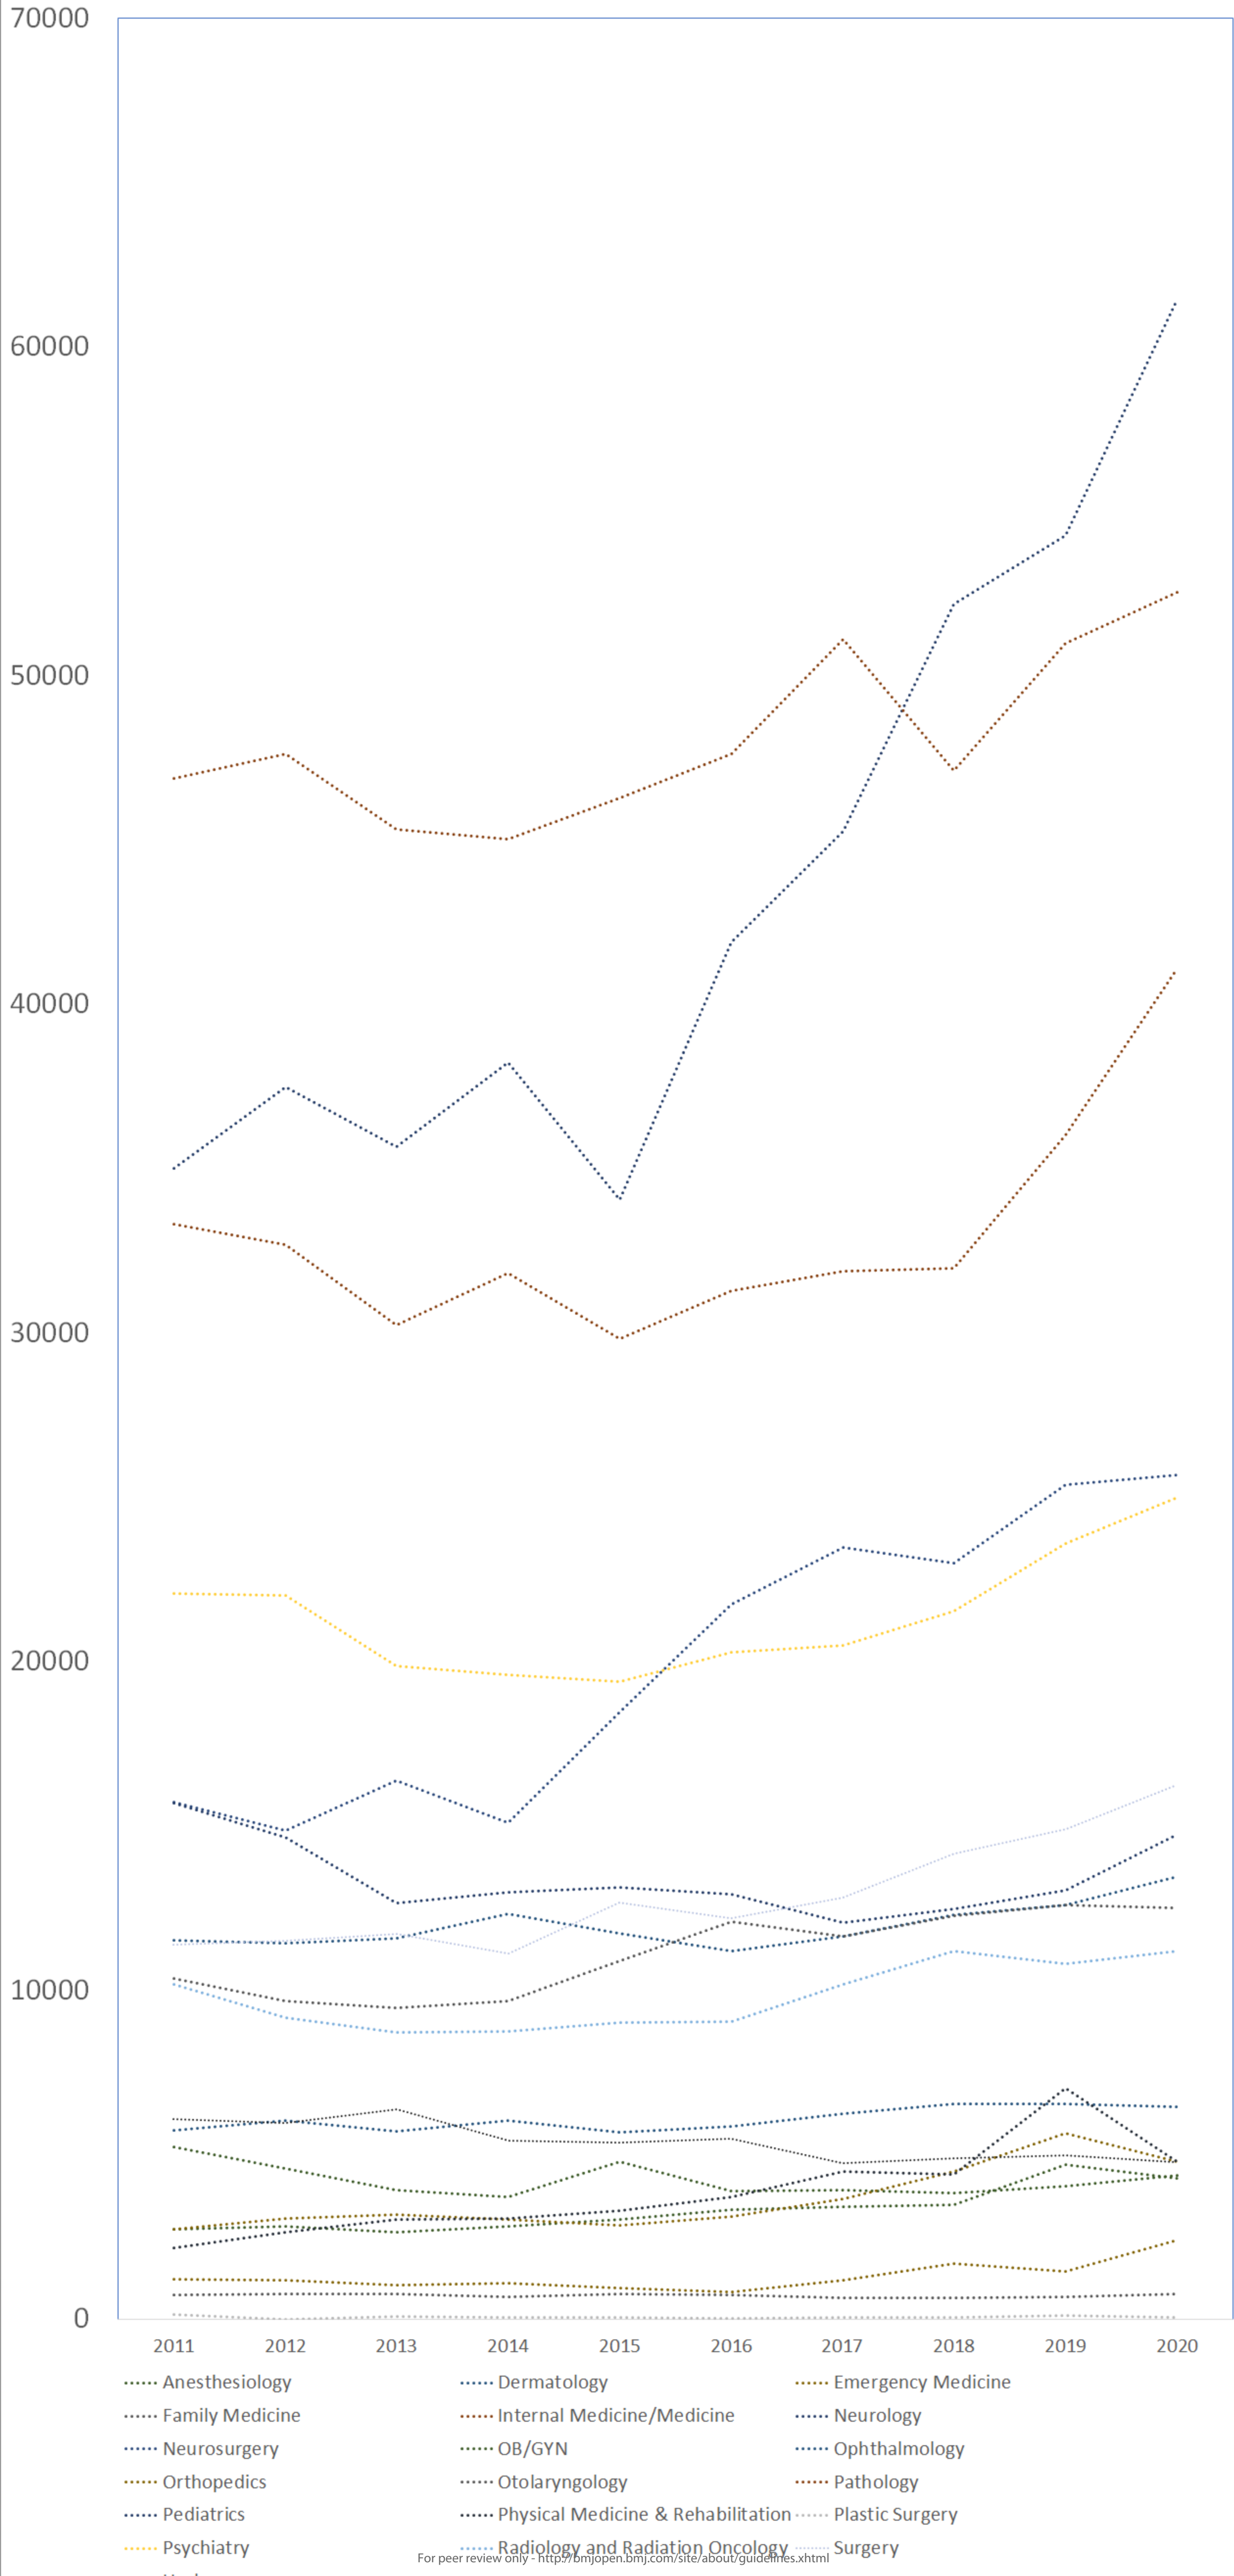

1  
2  
3  
4  
5  
6  
7  
8  
9  
10  
11  
12  
13  
14  
15  
16  
17  
18  
19  
20  
21  
22  
23  
24  
25  
26  
27  
28  
29  
30  
31  
32  
33  
34  
35  
36  
37  
38  
39  
40  
41  
42  
43  
44  
45  
46  
47  
48  
49  
50  
51  
52  
53  
54  
55  
56  
57  
58  
59  
60

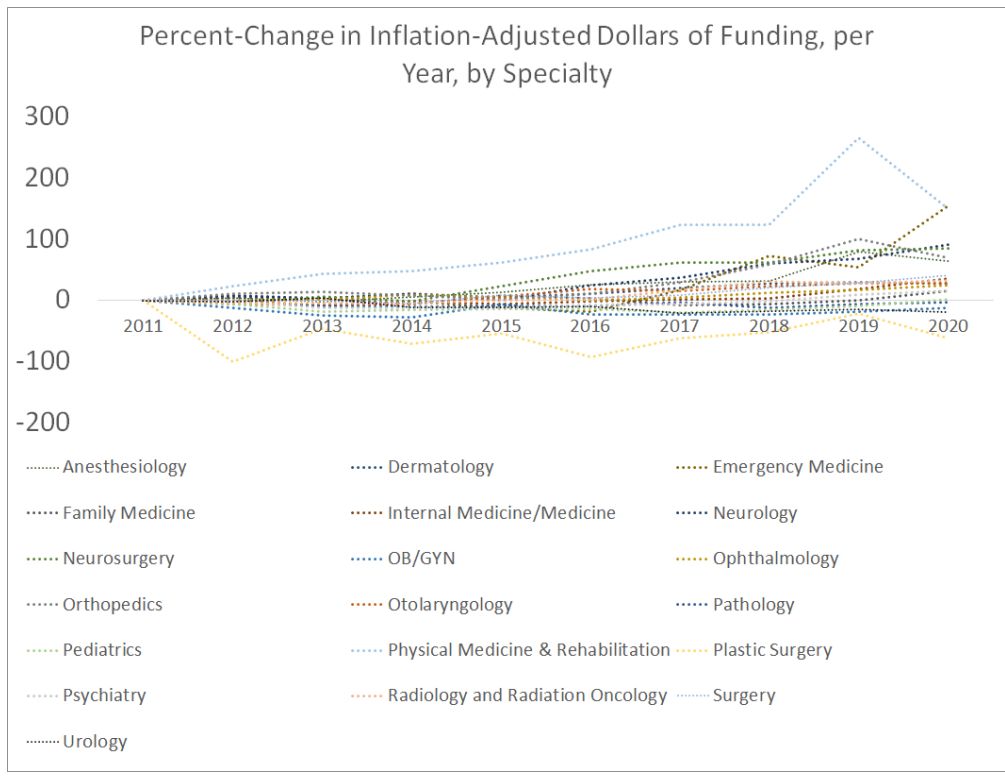

280x214mm (96 x 96 DPI)

# Number of Grants, per Year, by Specialty

BMJ Open

1  
2  
3  
4  
5  
6  
7  
8  
9  
10  
11  
12  
13  
14  
15  
16  
17  
18  
19  
20  
21  
22  
23  
24  
25  
26  
27  
28  
29  
30  
31  
32  
33  
34  
35  
36  
37  
38  
39  
40  
41  
42  
43  
44  
45  
46  
47  
48  
49  
50

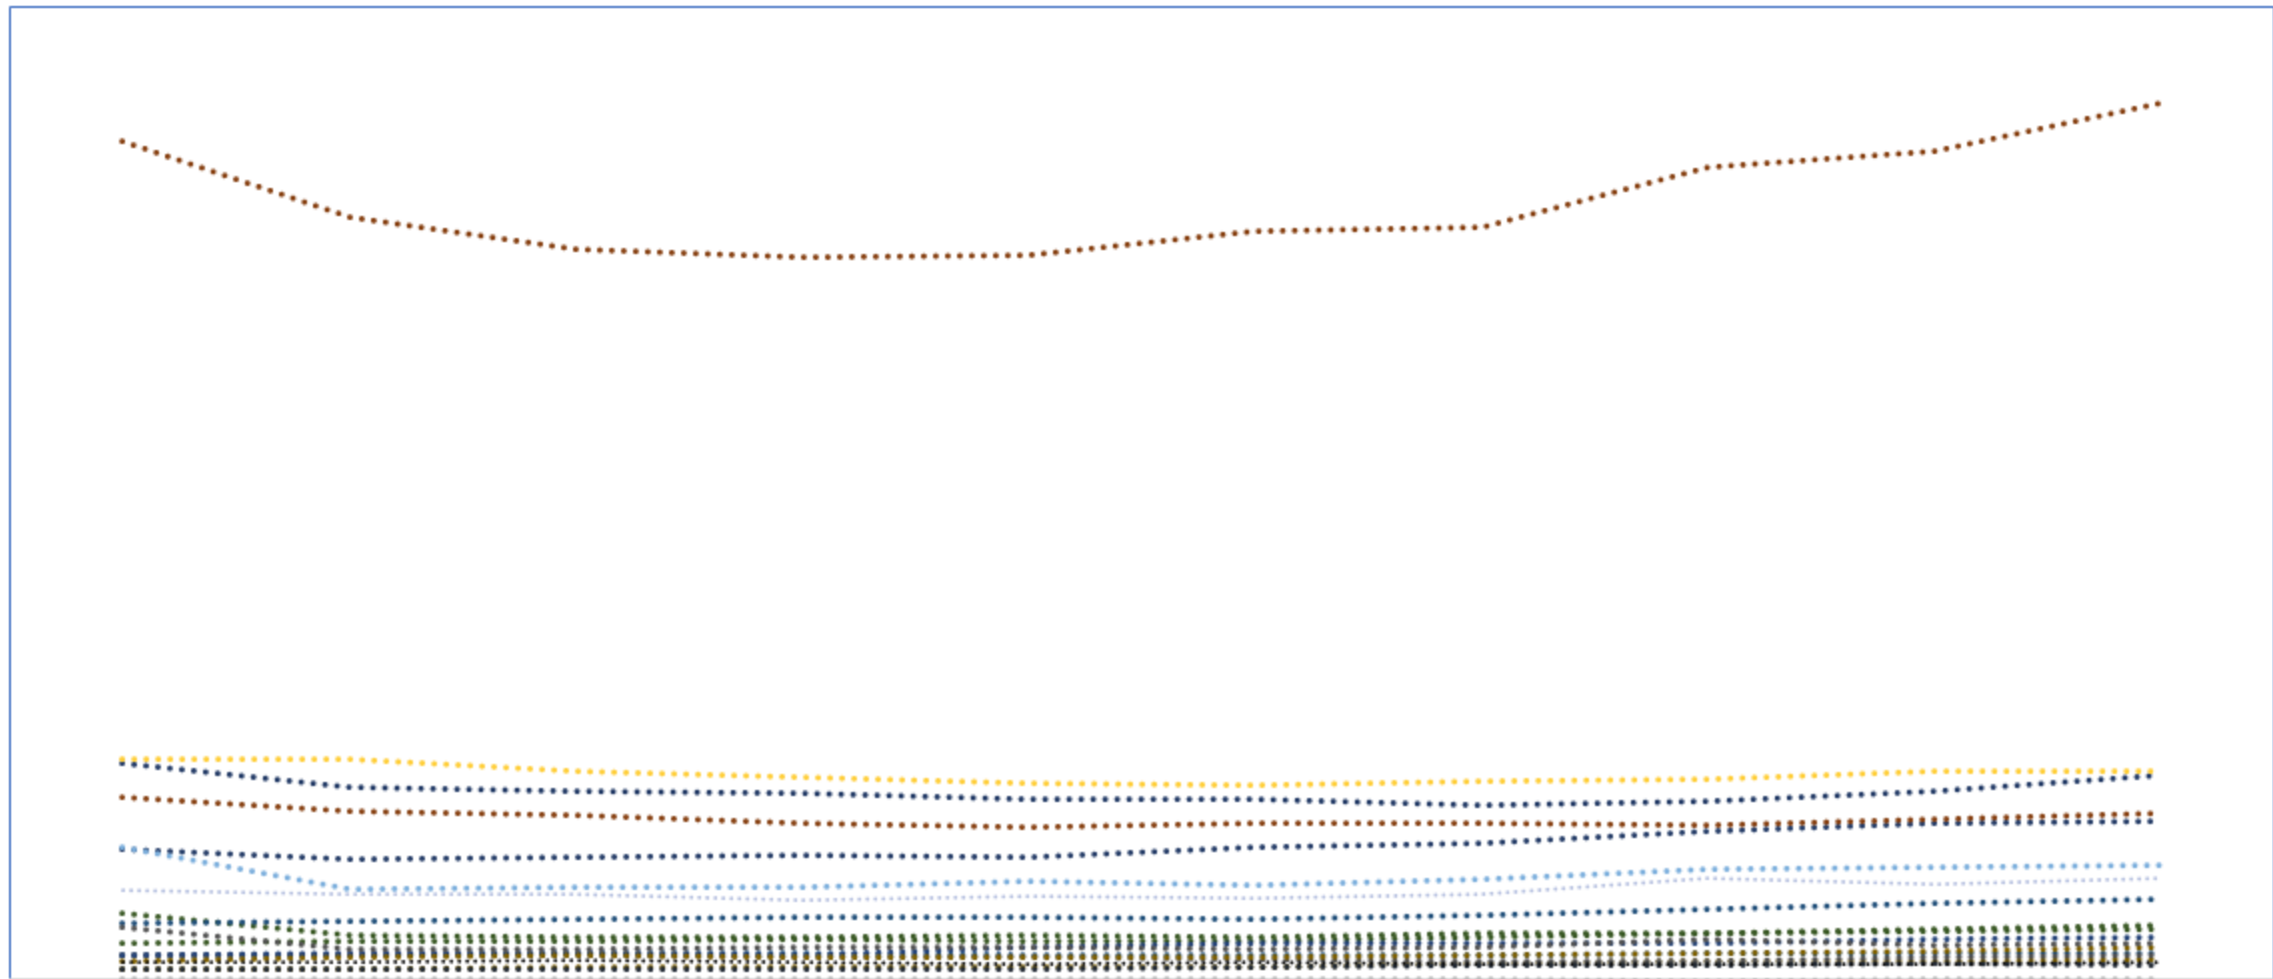

- ..... Anesthesiology
- ..... Dermatology
- ..... Emergency Medicine
- ..... Family Medicine
- ..... Internal Medicine/Medicine
- ..... Neurology
- ..... Neurosurgery
- ..... OB/GYN
- ..... Ophthalmology
- ..... Orthopedics
- ..... Otolaryngology
- ..... Pathology
- ..... Pediatrics
- ..... Physical Medicine & Rehabilitation
- ..... Plastic Surgery
- ..... Psychiatry
- ..... Radiology and Radiation Oncology
- ..... Surgery
- ..... Urology

# Number of Grants, per Year, by Specialty, without Internal Medicine

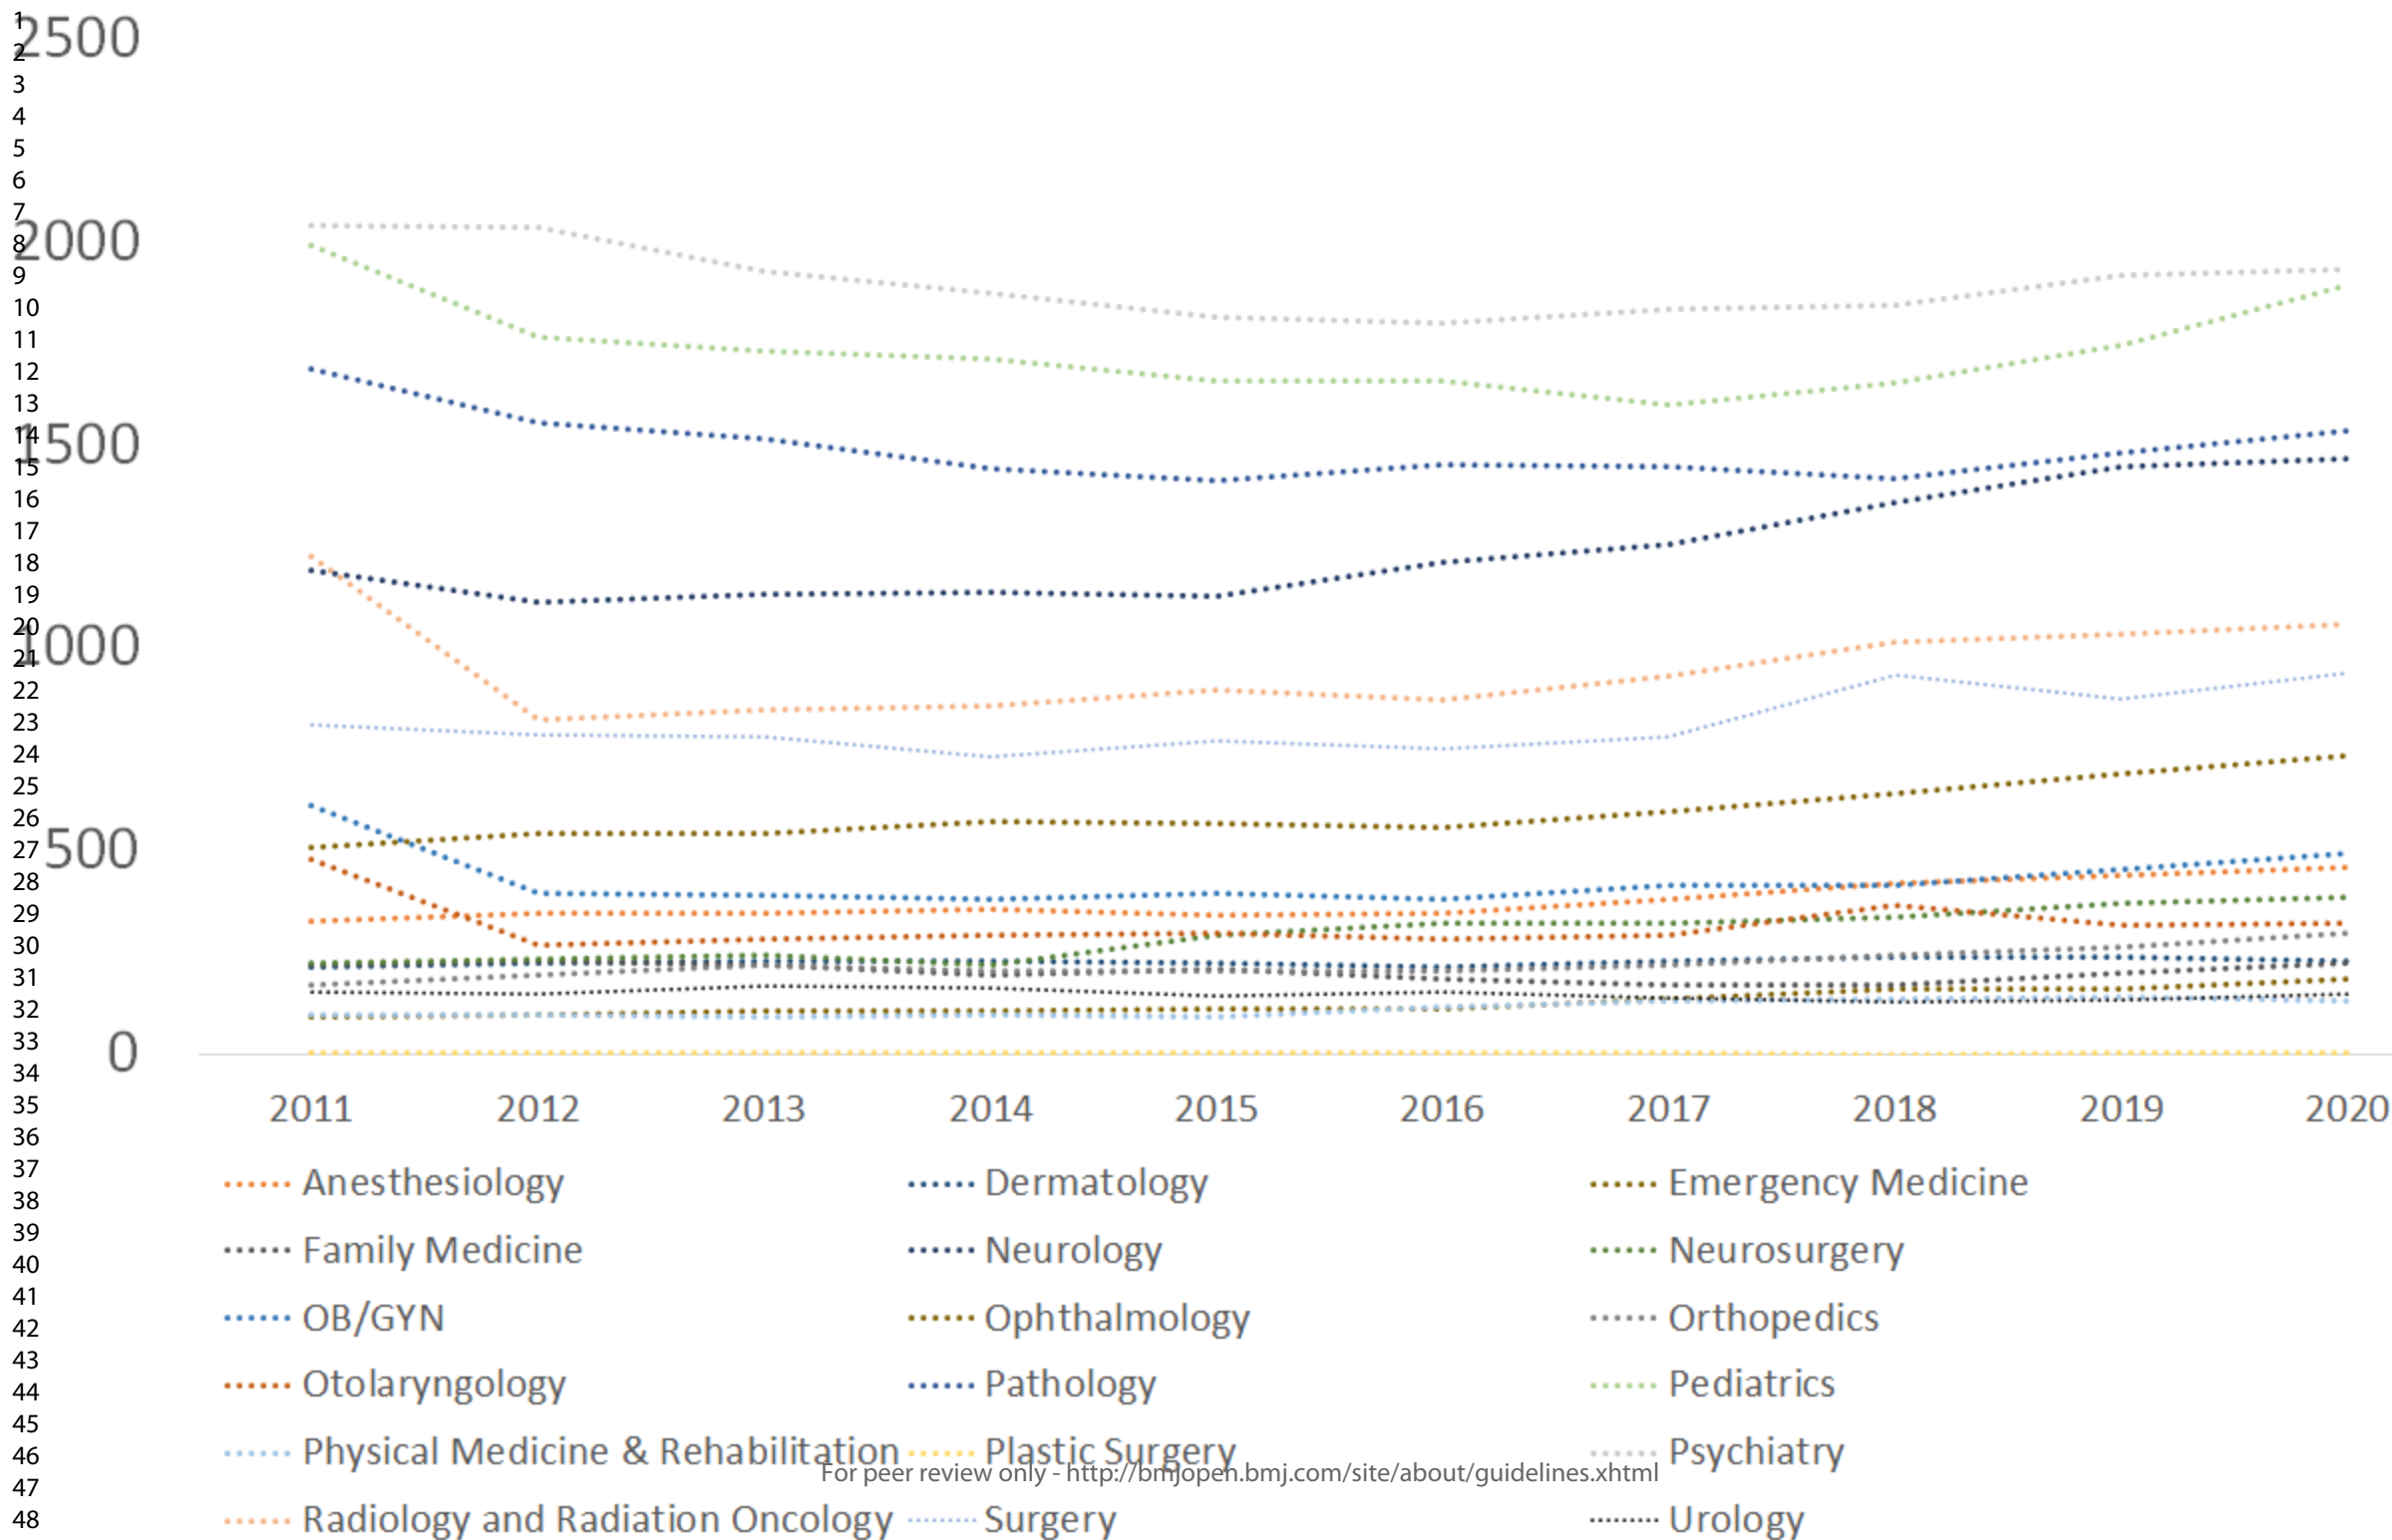









# K01 grant dollar amount comparisons P-values

Supplementary Figure 5: P-values comparing mean K01 funding amount by specialty

Red –  $P < 0.0002924$ ; Yellow –  $0.0002924 \leq P < 0.05$ ; Green –  $P \geq 0.05$ ; Gray – Insufficient data for comparison

1  
2  
3  
4  
5  
6  
7  
8  
9  
10  
11  
12  
13  
14  
15  
16  
17  
18  
19  
20  
21  
22  
23  
24  
25  
26  
27  
28  
29  
30  
31  
32  
33  
34  
35  
36  
37  
38

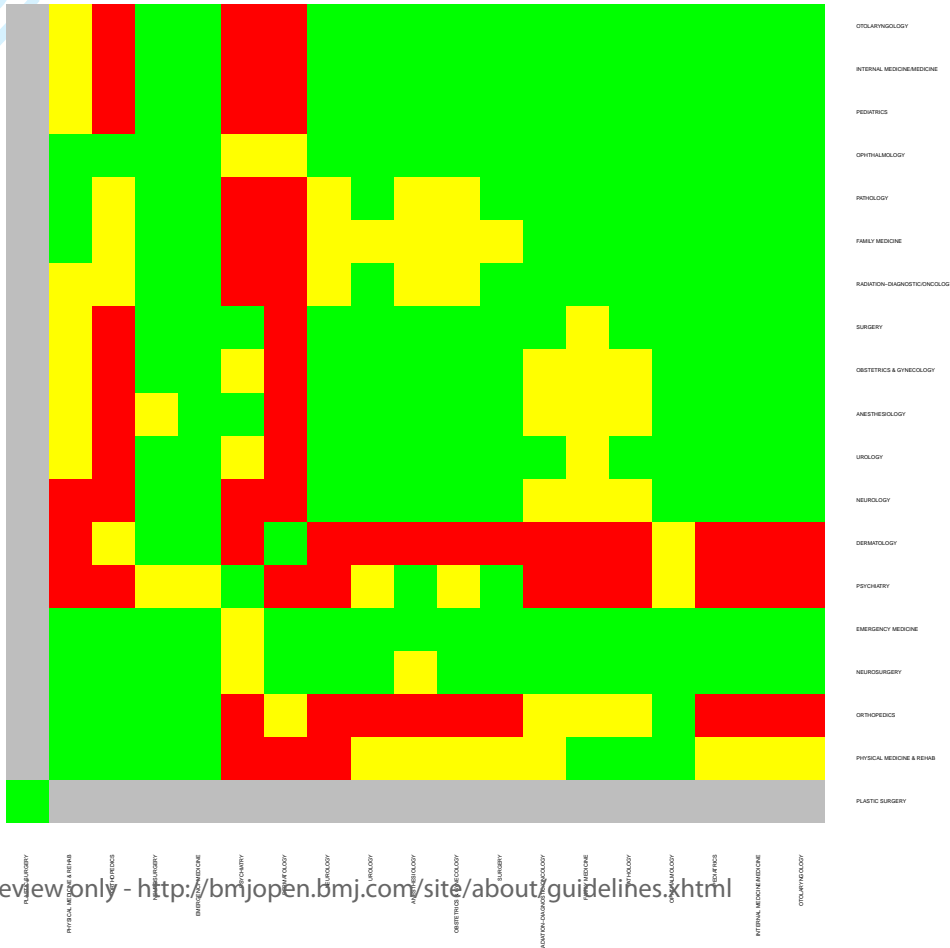

# K08 grant dollar amount comparisons P-values

Supplementary Figure 6: P-values comparing mean K08 funding amount by specialty

Red –  $P < 0.0002924$ ; Yellow –  $0.0002924 \leq P < 0.05$ ; Green –  $P \geq 0.05$ ; Gray – Insufficient data for comparison

1  
2  
3  
4  
5  
6  
7  
8  
9  
10  
11  
12  
13  
14  
15  
16  
17  
18  
19  
20  
21  
22  
23  
24  
25  
26  
27  
28  
29  
30  
31  
32  
33  
34  
35  
36  
37  
38

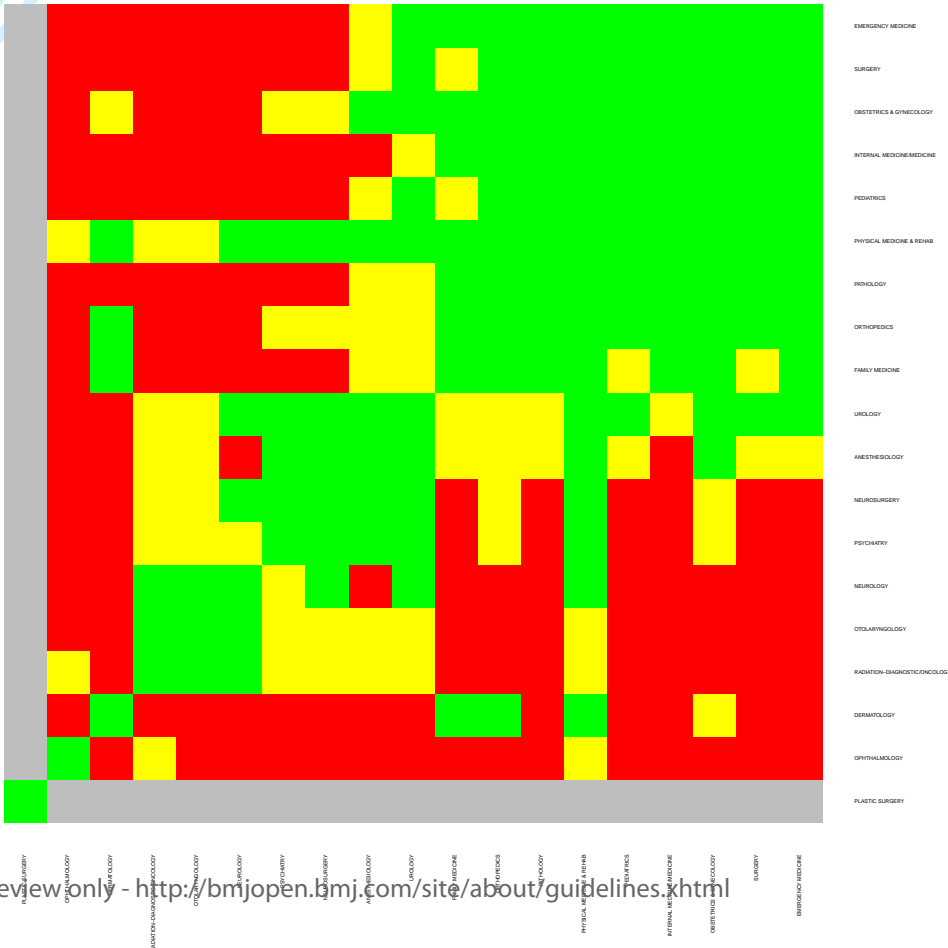

# K23 grant dollar amount comparisons P-values

Supplementary Figure 7: P-values comparing mean K23 funding amount by specialty

Red –  $P < 0.0002924$ ; Yellow –  $0.0002924 \leq P < 0.05$ ; Green –  $P \geq 0.05$ ; Gray – Insufficient data for comparison

FO

1  
2  
3  
4  
5  
6  
7  
8  
9  
10  
11  
12  
13  
14  
15  
16  
17  
18  
19  
20  
21  
22  
23  
24  
25  
26  
27  
28  
29  
30  
31  
32  
33  
34  
35  
36  
37  
38

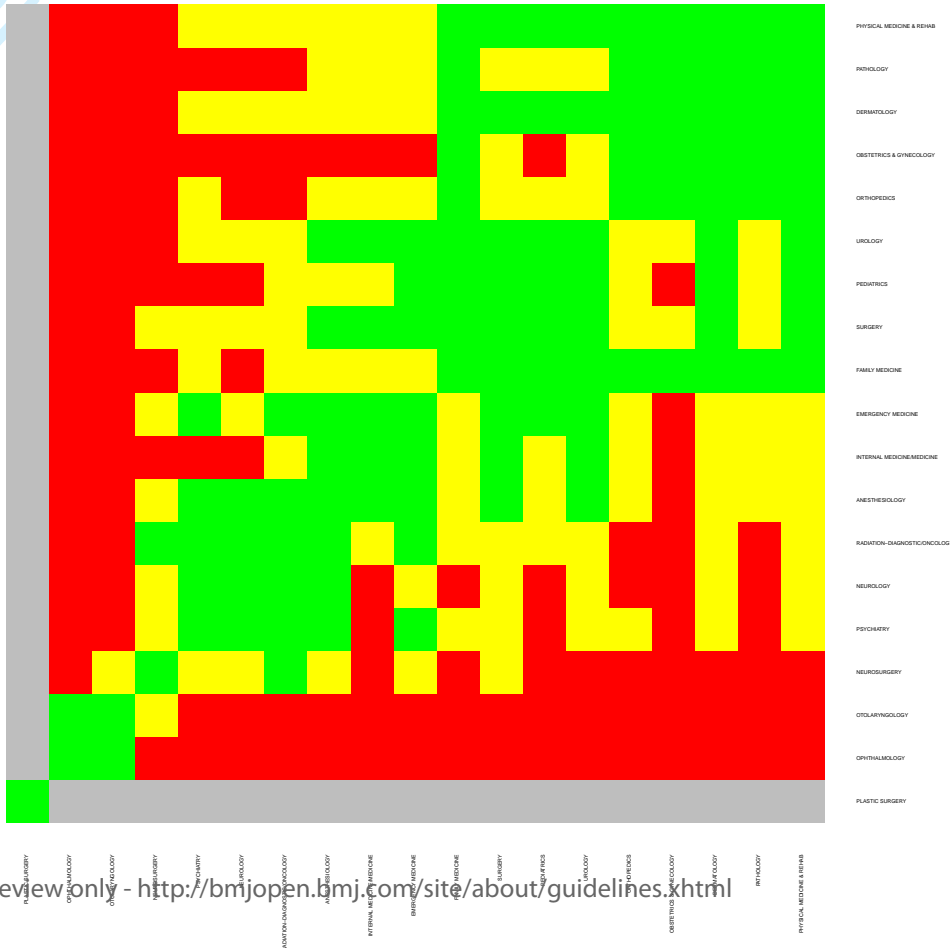





# R21 grant dollar amount comparisons P-values

Supplementary Figure 10: P-values comparing mean R21 funding amount by specialty

Red –  $P < 0.0002924$ ; Yellow –  $0.0002924 \leq P < 0.05$ ; Green –  $P \geq 0.05$ ; Gray – Insufficient data for comparison

1  
2  
3  
4  
5  
6  
7  
8  
9  
10  
11  
12  
13  
14  
15  
16  
17  
18  
19  
20  
21  
22  
23  
24  
25  
26  
27  
28  
29  
30  
31  
32  
33  
34  
35  
36  
37  
38

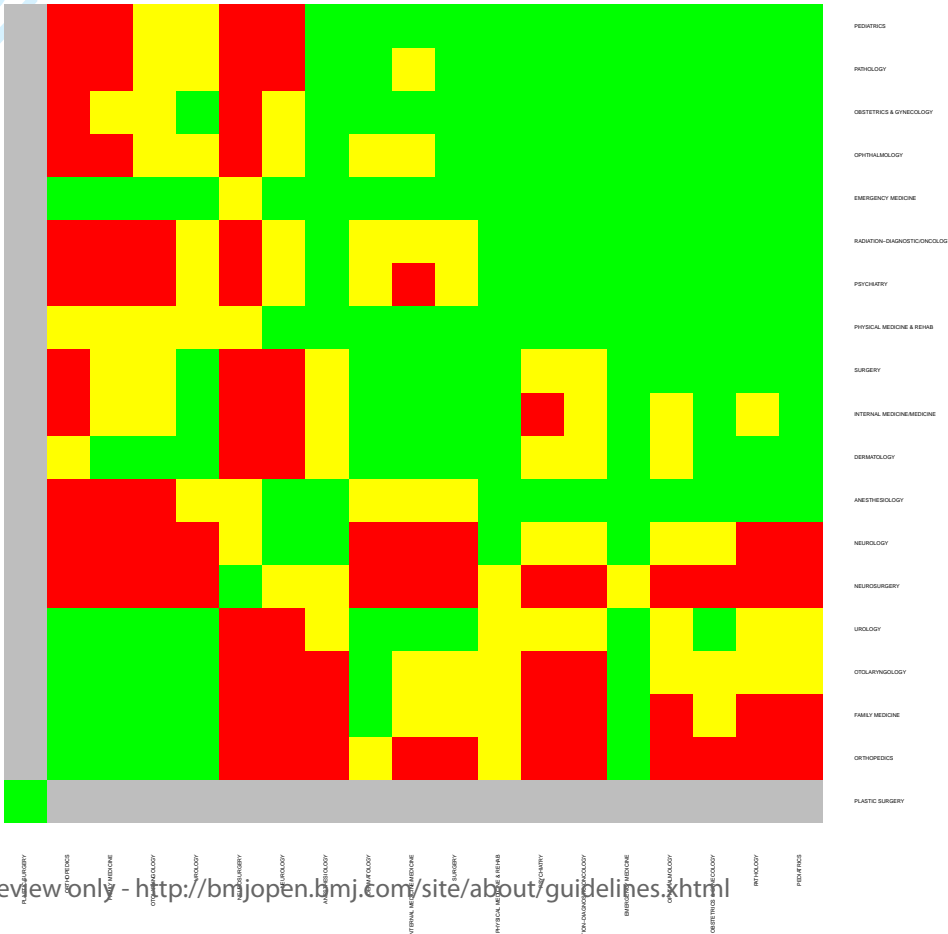

# P30 grant dollar amount comparisons P-values

Supplementary Figure 11: P-values comparing mean P30 funding amount by specialty

Red –  $P < 0.0002924$ ; Yellow –  $0.0002924 \leq P < 0.05$ ; Green –  $P \geq 0.05$ ; Gray – Insufficient data for comparison

FO

1  
2  
3  
4  
5  
6  
7  
8  
9  
10  
11  
12  
13  
14  
15  
16  
17  
18  
19  
20  
21  
22  
23  
24  
25  
26  
27  
28  
29  
30  
31  
32  
33  
34  
35  
36  
37  
38

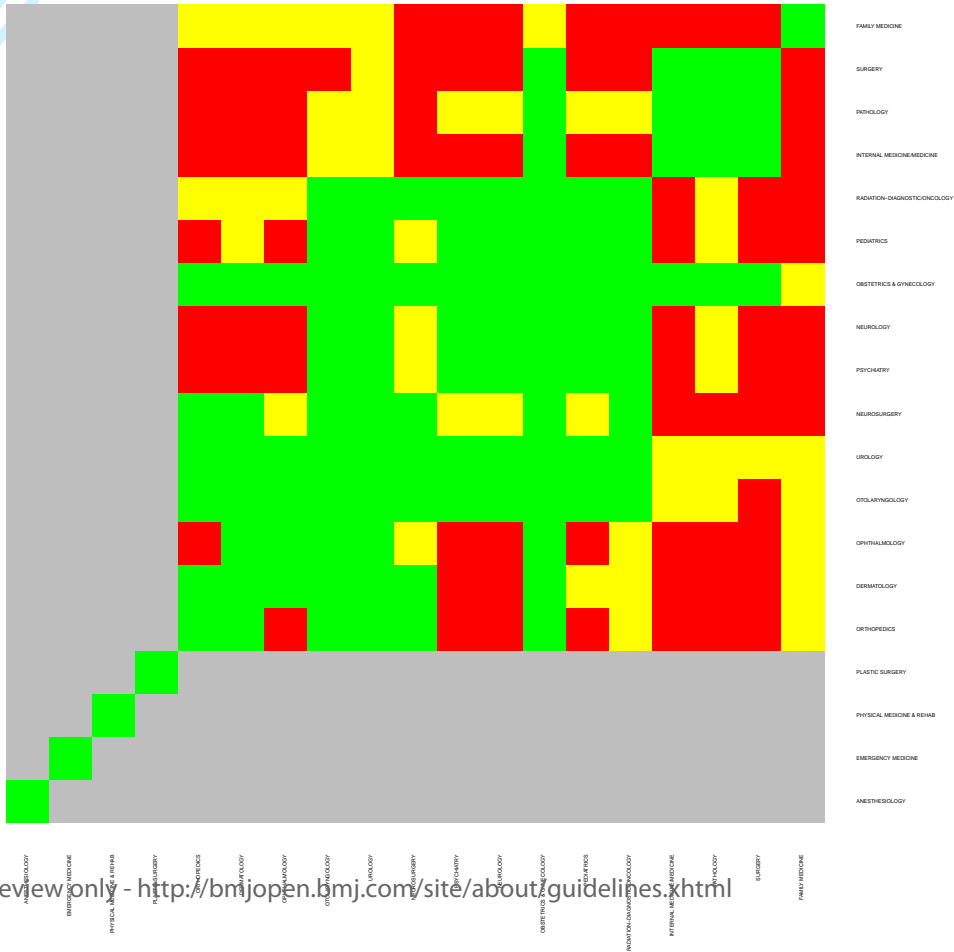

# U01 grant dollar amount comparisons P-values

Supplementary Figure 12: P-values comparing mean U01 funding amount by specialty

Red –  $P < 0.0002924$ ; Yellow –  $0.0002924 \leq P < 0.05$ ; Green –  $P \geq 0.05$ ; Gray – Insufficient data for comparison

1  
2  
3  
4  
5  
6  
7  
8  
9  
10  
11  
12  
13  
14  
15  
16  
17  
18  
19  
20  
21  
22  
23  
24  
25  
26  
27  
28  
29  
30  
31  
32  
33  
34  
35  
36  
37  
38

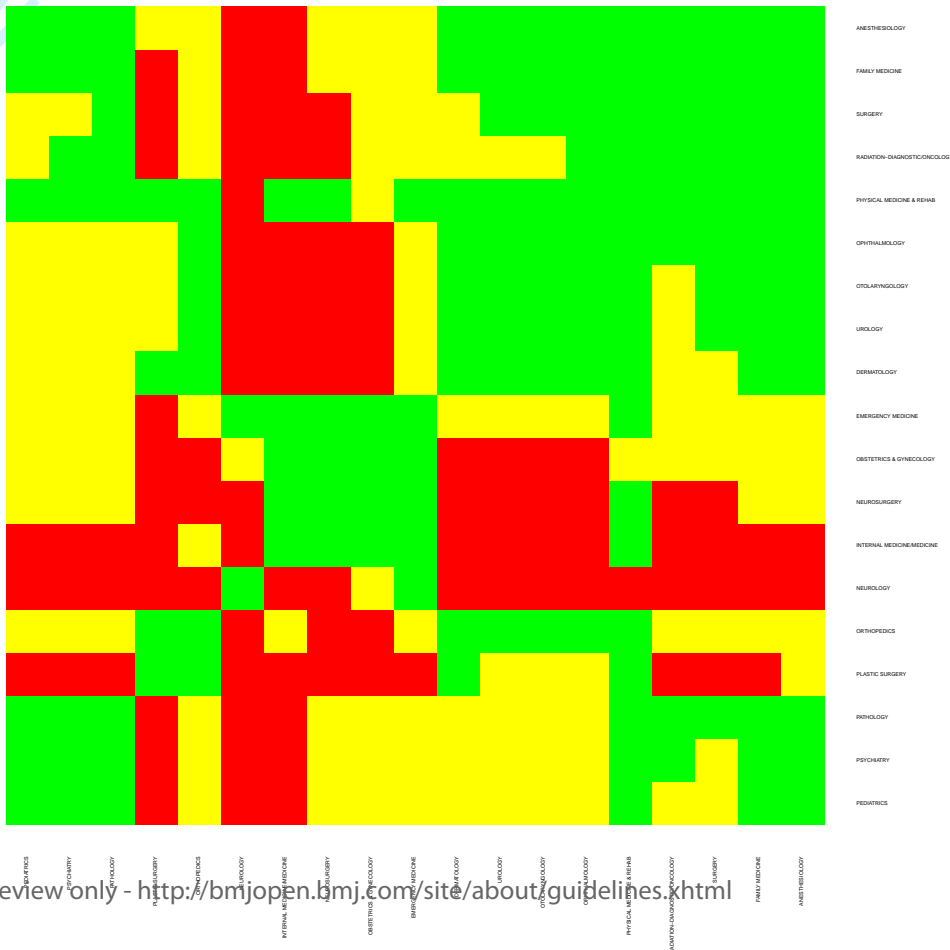



Supplementary Table 1 : Number of NIH training grants (F32, T32) awarded from 2

| <b>F32 grants</b>             | <b>2011</b> | <b>2012</b> | <b>2013</b> |
|-------------------------------|-------------|-------------|-------------|
| Anesthesiology                | 4           | 6           | 8           |
| Dermatology                   | 4           | 4           | 3           |
| Emergency Medicine            | 1           | 1           | 1           |
| Family Medicine               | 0           | 0           | 0           |
| Internal Medicine/Medicine    | 126         | 112         | 116         |
| Neurology                     | 15          | 10          | 20          |
| Neurosurgery                  | 8           | 8           | 8           |
| Obstetrics and Gynecology     | 4           | 6           | 4           |
| Ophthalmology                 | 4           | 7           | 7           |
| Orthopedics                   | 5           | 6           | 5           |
| Otolaryngology                | 10          | 7           | 7           |
| Pathology                     | 22          | 17          | 22          |
| Pediatrics                    | 25          | 27          | 24          |
| Physical Medicine & Rehab     | 1           | 1           | 0           |
| Plastic Surgery               | 0           | 0           | 0           |
| Psychiatry                    | 39          | 29          | 28          |
| Radiation-Diagnostic/Oncology | 14          | 8           | 5           |
| Surgery                       | 17          | 15          | 13          |
| Urology                       | 2           | 2           | 2           |
|                               |             |             |             |
| <b>T32</b>                    | <b>2011</b> | <b>2012</b> | <b>2013</b> |
| Anesthesiology                | 13          | 15          | 14          |
| Dermatology                   | 12          | 12          | 12          |
| Emergency Medicine            | 0           | 0           | 0           |
| Family Medicine               | 5           | 4           | 6           |
| Internal Medicine/Medicine    | 382         | 389         | 357         |
| Neurology                     | 37          | 34          | 32          |
| Neurosurgery                  | 3           | 3           | 3           |
| Obstetrics and Gynecology     | 12          | 11          | 12          |
| Ophthalmology                 | 15          | 16          | 21          |
| Orthopedics                   | 8           | 9           | 8           |
| Otolaryngology                | 12          | 12          | 11          |
| Pathology                     | 86          | 75          | 70          |
| Pediatrics                    | 108         | 99          | 90          |
| Physical Medicine & Rehab     | 9           | 4           | 4           |
| Plastic Surgery               | 0           | 0           | 0           |
| Psychiatry                    | 77          | 79          | 80          |
| Radiation-Diagnostic/Oncology | 22          | 20          | 22          |

|         |    |    |    |
|---------|----|----|----|
| Surgery | 54 | 56 | 54 |
| Urology | 7  | 8  | 7  |

**Supplementary Table 2: Number of NIH career development grants (K01, K08, K23)**

| <b>K01</b>                    | <b>2011</b> | <b>2012</b> | <b>2013</b> |
|-------------------------------|-------------|-------------|-------------|
| Anesthesiology                | 4           | 4           | 4           |
| Dermatology                   | 4           | 4           | 6           |
| Emergency Medicine            | 0           | 1           | 1           |
| Family Medicine               | 11          | 13          | 10          |
| Internal Medicine/Medicine    | 130         | 125         | 126         |
| Neurology                     | 12          | 13          | 16          |
| Neurosurgery                  | 3           | 3           | 1           |
| Obstetrics and Gynecology     | 2           | 1           | 2           |
| Ophthalmology                 | 0           | 0           | 0           |
| Orthopedics                   | 5           | 4           | 7           |
| Otolaryngology                | 2           | 2           | 2           |
| Pathology                     | 13          | 14          | 15          |
| Pediatrics                    | 20          | 16          | 18          |
| Physical Medicine & Rehab     | 3           | 4           | 4           |
| Plastic Surgery               | 0           | 0           | 0           |
| Psychiatry                    | 81          | 84          | 76          |
| Radiation-Diagnostic/Oncology | 17          | 15          | 13          |
| Surgery                       | 8           | 7           | 11          |
| Urology                       | 1           | 1           | 1           |
|                               |             |             |             |
| <b>K08</b>                    | <b>2011</b> | <b>2012</b> | <b>2013</b> |
| Anesthesiology                | 13          | 14          | 15          |
| Dermatology                   | 18          | 19          | 17          |
| Emergency Medicine            | 2           | 4           | 7           |
| Family Medicine               | 5           | 5           | 5           |
| Internal Medicine/Medicine    | 277         | 270         | 243         |
| Neurology                     | 39          | 36          | 39          |
| Neurosurgery                  | 7           | 7           | 9           |
| Obstetrics and Gynecology     | 8           | 8           | 7           |
| Ophthalmology                 | 24          | 24          | 29          |
| Orthopedics                   | 1           | 2           | 4           |
| Otolaryngology                | 12          | 14          | 12          |
| Pathology                     | 38          | 33          | 36          |
| Pediatrics                    | 114         | 96          | 93          |

|                               |             |             |             |
|-------------------------------|-------------|-------------|-------------|
| Physical Medicine & Rehab     | 1           | 1           | 1           |
| Plastic Surgery               | 0           | 0           | 0           |
| Psychiatry                    | 34          | 31          | 21          |
| Radiation-Diagnostic/Oncology | 5           | 5           | 5           |
| Surgery                       | 59          | 57          | 50          |
| Urology                       | 8           | 8           | 11          |
|                               |             |             |             |
| <b>K23</b>                    | <b>2011</b> | <b>2012</b> | <b>2013</b> |
| Anesthesiology                | 9           | 10          | 13          |
| Dermatology                   | 3           | 4           | 3           |
| Emergency Medicine            | 18          | 15          | 15          |
| Family Medicine               | 9           | 8           | 6           |
| Internal Medicine/Medicine    | 306         | 315         | 306         |
| Neurology                     | 61          | 59          | 48          |
| Neurosurgery                  | 2           | 4           | 5           |
| Obstetrics and Gynecology     | 12          | 14          | 11          |
| Ophthalmology                 | 15          | 11          | 13          |
| Orthopedics                   | 2           | 3           | 3           |
| Otolaryngology                | 8           | 6           | 6           |
| Pathology                     | 4           | 3           | 2           |
| Pediatrics                    | 94          | 93          | 89          |
| Physical Medicine & Rehab     | 7           | 6           | 10          |
| Plastic Surgery               | 0           | 0           | 0           |
| Psychiatry                    | 119         | 117         | 104         |
| Radiation-Diagnostic/Oncology | 6           | 4           | 4           |
| Surgery                       | 13          | 12          | 11          |
| Urology                       | 2           | 1           | 2           |
| Otolaryngology                | 142         | 149         | 159         |
| Pathology                     | 928         | 881         | 851         |
| Pediatrics                    | 769         | 803         | 777         |
| Physical Medicine & Rehab     | 31          | 35          | 33          |
| Plastic Surgery               | 3           | 0           | 1           |
| Psychiatry                    | 1010        | 990         | 904         |
| Radiation-Diagnostic/Oncology | 529         | 516         | 526         |
| Surgery                       | 413         | 390         | 369         |
| Urology                       | 78          | 77          | 83          |
|                               |             |             |             |
|                               |             |             |             |

**Supplementary Table 3: Number of NIH advanced career grants (R01, R03, R21, P3**

|  |  |  |  |
|--|--|--|--|
|  |  |  |  |
|  |  |  |  |

| <b>R01</b>                    | <b>2011</b> | <b>2012</b> | <b>2013</b> |
|-------------------------------|-------------|-------------|-------------|
| Anesthesiology                | 199         | 214         | 214         |
| Dermatology                   | 115         | 124         | 126         |
| Emergency Medicine            | 26          | 30          | 30          |
| Family Medicine               | 77          | 85          | 76          |
| Internal Medicine/Medicine    | 3250        | 3114        | 2917        |
| Neurology                     | 520         | 551         | 538         |
| Neurosurgery                  | 138         | 141         | 140         |
| Obstetrics and Gynecology     | 145         | 133         | 139         |
| Ophthalmology                 | 340         | 362         | 351         |
| Orthopedics                   | 111         | 119         | 134         |
| Otolaryngology                | 142         | 149         | 159         |
| Pathology                     | 928         | 881         | 851         |
| Pediatrics                    | 769         | 803         | 777         |
| Physical Medicine & Rehab     | 31          | 35          | 33          |
| Plastic Surgery               | 3           | 0           | 1           |
| Psychiatry                    | 1010        | 990         | 904         |
| Radiation-Diagnostic/Oncology | 529         | 516         | 526         |
| Surgery                       | 413         | 390         | 369         |
| Urology                       | 78          | 77          | 83          |
|                               |             |             |             |
| <b>R03</b>                    | <b>2011</b> | <b>2012</b> | <b>2013</b> |
| Anesthesiology                | 6           | 9           | 6           |
| Dermatology                   | 5           | 6           | 2           |
| Emergency Medicine            | 1           | 1           | 1           |
| Family Medicine               | 8           | 9           | 9           |
| Internal Medicine/Medicine    | 118         | 139         | 132         |
| Neurology                     | 10          | 9           | 11          |
| Neurosurgery                  | 3           | 8           | 8           |
| Obstetrics and Gynecology     | 8           | 12          | 10          |
| Ophthalmology                 | 0           | 0           | 0           |
| Orthopedics                   | 10          | 10          | 12          |
| Otolaryngology                | 13          | 18          | 19          |
| Pathology                     | 25          | 23          | 21          |
| Pediatrics                    | 38          | 29          | 35          |
| Physical Medicine & Rehab     | 7           | 7           | 5           |
| Plastic Surgery               | 0           | 0           | 0           |
| Psychiatry                    | 25          | 28          | 30          |
| Radiation-Diagnostic/Oncology | 8           | 7           | 10          |
| Surgery                       | 15          | 20          | 17          |
| Urology                       | 1           | 3           | 2           |

| <b>R21</b>                    | <b>2011</b> | <b>2012</b> | <b>2013</b> |
|-------------------------------|-------------|-------------|-------------|
| Anesthesiology                | 27          | 24          | 27          |
| Dermatology                   | 19          | 18          | 18          |
| Emergency Medicine            | 6           | 5           | 3           |
| Family Medicine               | 14          | 16          | 19          |
| Internal Medicine/Medicine    | 375         | 407         | 393         |
| Neurology                     | 64          | 78          | 73          |
| Neurosurgery                  | 13          | 18          | 22          |
| Obstetrics and Gynecology     | 33          | 28          | 27          |
| Ophthalmology                 | 21          | 19          | 30          |
| Orthopedics                   | 14          | 20          | 19          |
| Otolaryngology                | 14          | 16          | 21          |
| Pathology                     | 124         | 104         | 112         |
| Pediatrics                    | 104         | 95          | 102         |
| Physical Medicine & Rehab     | 4           | 7           | 11          |
| Plastic Surgery               | 0           | 0           | 0           |
| Psychiatry                    | 122         | 166         | 191         |
| Radiation-Diagnostic/Oncology | 97          | 101         | 102         |
| Surgery                       | 58          | 54          | 46          |
| Urology                       | 8           | 9           | 5           |
|                               |             |             |             |
| <b>P30</b>                    | <b>2011</b> | <b>2012</b> | <b>2013</b> |
| Anesthesiology                | 0           | 0           | 0           |
| Dermatology                   | 11          | 8           | 8           |
| Emergency Medicine            | 0           | 0           | 0           |
| Family Medicine               | 0           | 4           | 4           |
| Internal Medicine/Medicine    | 248         | 217         | 206         |
| Neurology                     | 15          | 19          | 16          |
| Neurosurgery                  | 3           | 3           | 3           |
| Obstetrics and Gynecology     | 3           | 3           | 2           |
| Ophthalmology                 | 31          | 37          | 30          |
| Orthopedics                   | 4           | 4           | 4           |
| Otolaryngology                | 15          | 8           | 7           |
| Pathology                     | 17          | 18          | 20          |
| Pediatrics                    | 17          | 21          | 23          |
| Physical Medicine & Rehab     | 0           | 0           | 0           |
| Plastic Surgery               | 0           | 0           | 0           |
| Psychiatry                    | 13          | 15          | 17          |
| Radiation-Diagnostic/Oncology | 5           | 6           | 5           |
| Surgery                       | 13          | 11          | 15          |

|                               |             |             |             |
|-------------------------------|-------------|-------------|-------------|
| Urology                       | 7           | 6           | 5           |
|                               |             |             |             |
| <b>U01</b>                    | <b>2011</b> | <b>2012</b> | <b>2013</b> |
| Anesthesiology                | 7           | 7           | 7           |
| Dermatology                   | 3           | 5           | 7           |
| Emergency Medicine            | 10          | 13          | 17          |
| Family Medicine               | 11          | 14          | 12          |
| Internal Medicine/Medicine    | 386         | 399         | 432         |
| Neurology                     | 33          | 40          | 40          |
| Neurosurgery                  | 6           | 4           | 8           |
| Obstetrics and Gynecology     | 15          | 17          | 8           |
| Ophthalmology                 | 4           | 7           | 5           |
| Orthopedics                   | 0           | 0           | 1           |
| Otolaryngology                | 4           | 4           | 3           |
| Pathology                     | 54          | 54          | 46          |
| Pediatrics                    | 130         | 128         | 116         |
| Physical Medicine & Rehab     | 4           | 3           | 7           |
| Plastic Surgery               | 0           | 0           | 0           |
| Psychiatry                    | 53          | 87          | 79          |
| Radiation-Diagnostic/Oncology | 14          | 18          | 22          |
| Surgery                       | 51          | 53          | 57          |
| Urology                       | 14          | 15          | 17          |
|                               |             |             |             |

**Supplementary Table 4: Number of active physicians per awarded NIH training grant (F32)**

| <b>F32</b>                 | <b>2011</b> | <b>2012</b> | <b>2013</b> |
|----------------------------|-------------|-------------|-------------|
| Anesthesiology             | 1004        | 6740        | 5095        |
| Dermatology                | 2705        | 2773        | 3788        |
| Emergency Medicine         | 33984       | 35613       | 37241       |
| Family Medicine            | -           | -           | -           |
| Internal Medicine/Medicine | 865         | 983         | 957         |
| Neurology                  | 861         | 1304        | 658         |
| Neurosurgery               | 631         | 639         | 646         |
| Obstetrics and Gynecology  | 10094       | 6767        | 10207       |
| Ophthalmology              | 4486        | 2590        | 2617        |
| Orthopedics                | 3964        | 3266        | 3875        |
| Otolaryngology             | 923         | 1325        | 1331        |
| Pathology                  | 681         | 844         | 623         |

|                               |             |             |             |
|-------------------------------|-------------|-------------|-------------|
| Pediatrics                    | 2220        | 2070        | 2344        |
| Physical Medicine & Rehab     | 8503        | 8705        | -           |
| Plastic Surgery               | -           | -           | -           |
| Psychiatry                    | 982         | 1303        | 1332        |
| Radiation-Diagnostic/Oncology | 2318        | 4387        | 7550        |
| Surgery                       | 1548        | 1717        | 1937        |
| Urology                       | 4913        | 4899        | 4886        |
|                               |             |             |             |
| <b>T32</b>                    | <b>2011</b> | <b>2012</b> | <b>2013</b> |
| Anesthesiology                | 3086        | 2696        | 2911        |
| Dermatology                   | 902         | 924         | 947         |
| Emergency Medicine            | -           | -           | -           |
| Family Medicine               | 21310       | 26933       | 18153       |
| Internal Medicine/Medicine    | 285         | 283         | 311         |
| Neurology                     | 349         | 383         | 411         |
| Neurosurgery                  | 1682        | 1703        | 1724        |
| Obstetrics and Gynecology     | 3365        | 3691        | 3402        |
| Ophthalmology                 | 1196        | 1133        | 872         |
| Orthopedics                   | 2478        | 2178        | 2422        |
| Otolaryngology                | 769         | 773         | 847         |
| Pathology                     | 174         | 191         | 196         |
| Pediatrics                    | 514         | 565         | 625         |
| Physical Medicine & Rehab     | 945         | 2176        | 2227        |
| Plastic Surgery               | -           | -           | -           |
| Psychiatry                    | 497         | 478         | 466         |
| Radiation-Diagnostic/Oncology | 1475        | 1755        | 1716        |
| Surgery                       | 487         | 460         | 466         |
| Urology                       | 1404        | 1225        | 1396        |

**Supplementary Table 5: Number of active physicians per awarded NIH career devel**

| <b>K01</b>                 | <b>2011</b> | <b>2012</b> | <b>2013</b> |
|----------------------------|-------------|-------------|-------------|
| Anesthesiology             | 10031       | 10110       | 10190       |
| Dermatology                | 2705        | 2773        | 1894        |
| Emergency Medicine         | -           | 35613       | 37241       |
| Family Medicine            | 9686        | 8287        | 10892       |
| Internal Medicine/Medicine | 839         | 880         | 881         |
| Neurology                  | 1076        | 1003        | 822         |
| Neurosurgery               | 1682        | 1703        | 5171        |
| Obstetrics and Gynecology  | 20189       | 40602       | 20413       |
| Ophthalmology              | -           | -           | -           |

|    |                               |             |             |             |
|----|-------------------------------|-------------|-------------|-------------|
| 1  |                               |             |             |             |
| 2  | Orthopedics                   | 3964        | 4900        | 2768        |
| 3  | Otolaryngology                | 4616        | 4638        | 4660        |
| 4  | Pathology                     | 1152        | 1024        | 914         |
| 5  | Pediatrics                    | 2775        | 3493        | 3126        |
| 6  | Physical Medicine & Rehab     | 2834        | 2176        | 2227        |
| 7  | Plastic Surgery               | -           | -           | -           |
| 8  | Psychiatry                    | 473         | 450         | 491         |
| 9  | Radiation-Diagnostic/Oncology | 1909        | 2340        | 2904        |
| 10 | Surgery                       | 3289        | 3679        | 2290        |
| 11 | Urology                       | 9826        | 9799        | 9771        |
| 12 |                               |             |             |             |
| 13 |                               |             |             |             |
| 14 | <b>K08</b>                    | <b>2011</b> | <b>2012</b> | <b>2013</b> |
| 15 | Anesthesiology                | 3344        | 2889        | 2717        |
| 16 | Dermatology                   | 637         | 504         | 758         |
| 17 | Emergency Medicine            | 11328       | 8903        | 6207        |
| 18 | Family Medicine               | 21310       | 21547       | 21783       |
| 19 | Internal Medicine/Medicine    | 405         | 409         | 461         |
| 20 | Neurology                     | 340         | 352         | 337         |
| 21 | Neurosurgery                  | 721         | 730         | 646         |
| 22 | Obstetrics and Gynecology     | 5768        | 4511        | 5832        |
| 23 | Ophthalmology                 | 718         | 755         | 654         |
| 24 | Orthopedics                   | 19822       | 6533        | 4844        |
| 25 | Otolaryngology                | 769         | 714         | 717         |
| 26 | Pathology                     | 428         | 410         | 416         |
| 27 | Pediatrics                    | 509         | 565         | 592         |
| 28 | Physical Medicine & Rehab     | -           | 4352        | -           |
| 29 | Plastic Surgery               | -           | -           | -           |
| 30 | Psychiatry                    | 1160        | 1219        | 1963        |
| 31 | Radiation-Diagnostic/Oncology | 6489        | 7020        | 7550        |
| 32 | Surgery                       | 454         | 444         | 494         |
| 33 | Urology                       | 1092        | 1225        | 888         |
| 34 |                               |             |             |             |
| 35 |                               |             |             |             |
| 36 | <b>K23</b>                    | <b>2011</b> | <b>2012</b> | <b>2013</b> |
| 37 | Anesthesiology                | 4458        | 4044        | 3135        |
| 38 | Dermatology                   | 3607        | 2773        | 3788        |
| 39 | Emergency Medicine            | 1888        | 2374        | 2483        |
| 40 | Family Medicine               | 11839       | 13467       | 18153       |
| 41 | Internal Medicine/Medicine    | 356         | 349         | 363         |
| 42 | Neurology                     | 212         | 221         | 274         |
| 43 | Neurosurgery                  | 2524        | 1277        | 1034        |
| 44 | Obstetrics and Gynecology     | 3365        | 2900        | 3711        |



|                               |      |      |      |
|-------------------------------|------|------|------|
| Ophthalmology                 | 1196 | 1648 | 1409 |
| Orthopedics                   | 9911 | 6533 | 6458 |
| Otolaryngology                | 1154 | 1546 | 1553 |
| Pathology                     | 3744 | 4781 | 6855 |
| Pediatrics                    | 591  | 601  | 632  |
| Physical Medicine & Rehab     | 1215 | 1451 | 891  |
| Plastic Surgery               | -    | -    | -    |
| Psychiatry                    | 322  | 323  | 359  |
| Radiation-Diagnostic/Oncology | 5408 | 8774 | 9438 |
| Surgery                       | 2024 | 2146 | 2290 |
| Urology                       | 4913 | 9799 | 4886 |

**Supplementary Table 6: Number of active physicians per awarded NIH advanced career grant**

| <b>R01</b>                    | <b>2011</b> | <b>2012</b> | <b>2013</b> |
|-------------------------------|-------------|-------------|-------------|
| Anesthesiology                | 202         | 189         | 190         |
| Dermatology                   | 94          | 89          | 90          |
| Emergency Medicine            | 1307        | 1187        | 1241        |
| Family Medicine               | 1384        | 1267        | 1433        |
| Internal Medicine/Medicine    | 34          | 35          | 38          |
| Neurology                     | 25          | 24          | 24          |
| Neurosurgery                  | 37          | 36          | 37          |
| Obstetrics and Gynecology     | 278         | 305         | 294         |
| Ophthalmology                 | 53          | 50          | 52          |
| Orthopedics                   | 179         | 165         | 145         |
| Otolaryngology                | 65          | 62          | 59          |
| Pathology                     | 16          | 16          | 16          |
| Pediatrics                    | 72          | 70          | 72          |
| Physical Medicine & Rehab     | 274         | 249         | 270         |
| Plastic Surgery               | 2274        | -           | 6942        |
| Psychiatry                    | 38          | 38          | 41          |
| Radiation-Diagnostic/Oncology | 61          | 68          | 72          |
| Surgery                       | 64          | 66          | 68          |
| Urology                       | 126         | 127         | 118         |
|                               |             |             |             |
| <b>R03</b>                    | <b>2011</b> | <b>2012</b> | <b>2013</b> |
| Anesthesiology                | 6687        | 4493        | 6793        |
| Dermatology                   | 2164        | 1849        | 5682        |
| Emergency Medicine            | 33984       | 35613       | 37241       |
| Family Medicine               | 13319       | 11970       | 12102       |

|    |                               |             |             |             |
|----|-------------------------------|-------------|-------------|-------------|
| 1  |                               |             |             |             |
| 2  | Internal Medicine/Me dicine   | 924         | 792         | 841         |
| 3  | Neurology                     | 1292        | 1448        | 1196        |
| 4  | Neurosurgery                  | 1682        | 639         | 646         |
| 5  | Obstetrics and Gynecology     | 5047        | 3383        | 4083        |
| 6  | Ophthalmology                 | -           | -           | -           |
| 7  | Orthopedics                   | 1982        | 1960        | 1615        |
| 8  | Otolaryngology                | 710         | 515         | 491         |
| 9  | Pathology                     | 599         | 624         | 653         |
| 10 | Pediatrics                    | 1461        | 1928        | 1607        |
| 11 | Physical Medicine & Rehab     | 1215        | 1244        | 1781        |
| 12 | Plastic Surgery               | -           | -           | -           |
| 13 | Psychiatry                    | 1531        | 1350        | 1243        |
| 14 | Radiation-Diagnostic/Oncology | 4056        | 5014        | 3775        |
| 15 | Surgery                       | 1754        | 1288        | 1482        |
| 16 | Urology                       | 9826        | 3266        | 4886        |
| 17 |                               |             |             |             |
| 18 | <b>R21</b>                    | <b>2011</b> | <b>2012</b> | <b>2013</b> |
| 19 | Anesthesiology                | 1486        | 1685        | 1510        |
| 20 | Dermatology                   | 569         | 616         | 631         |
| 21 | Emergency Medicine            | 5664        | 7123        | 12414       |
| 22 | Family Medicine               | 7611        | 6733        | 5732        |
| 23 | Internal Medicine/Medicine    | 291         | 270         | 283         |
| 24 | Neurology                     | 202         | 167         | 180         |
| 25 | Neurosurgery                  | 388         | 284         | 235         |
| 26 | Obstetrics and Gynecology     | 1224        | 1450        | 1512        |
| 27 | Ophthalmology                 | 854         | 954         | 611         |
| 28 | Orthopedics                   | 1416        | 980         | 1020        |
| 29 | Otolaryngology                | 659         | 580         | 444         |
| 30 | Pathology                     | 121         | 138         | 122         |
| 31 | Pediatrics                    | 534         | 588         | 552         |
| 32 | Physical Medicine & Rehab     | 2126        | 1244        | 810         |
| 33 | Plastic Surgery               | -           | -           | -           |
| 34 | Psychiatry                    | 314         | 228         | 195         |
| 35 | Radiation-Diagnostic/Oncology | 334         | 348         | 370         |
| 36 | Surgery                       | 454         | 477         | 548         |
| 37 | Urology                       | 1228        | 1089        | 1954        |
| 38 |                               |             |             |             |
| 39 | <b>P30</b>                    | <b>2011</b> | <b>2012</b> | <b>2013</b> |
| 40 | Anesthesiology                | -           | -           | -           |
| 41 | Dermatology                   | 984         | 1386        | 1420        |
| 42 | Emergency Medicine            | -           | -           | -           |
| 43 |                               |             |             |             |
| 44 |                               |             |             |             |
| 45 |                               |             |             |             |
| 46 |                               |             |             |             |
| 47 |                               |             |             |             |
| 48 |                               |             |             |             |
| 49 |                               |             |             |             |
| 50 |                               |             |             |             |
| 51 |                               |             |             |             |
| 52 |                               |             |             |             |
| 53 |                               |             |             |             |
| 54 |                               |             |             |             |
| 55 |                               |             |             |             |
| 56 |                               |             |             |             |
| 57 |                               |             |             |             |
| 58 |                               |             |             |             |
| 59 |                               |             |             |             |
| 60 |                               |             |             |             |

|    |                               |             |             |
|----|-------------------------------|-------------|-------------|
| 1  |                               |             |             |
| 2  | Family Medicine               | -           | 26933       |
| 3  | Internal Medicine/Medicine    | 440         | 507         |
| 4  | Neurology                     | 861         | 686         |
| 5  | Neurosurgery                  | 1682        | 1703        |
| 6  | Obstetrics and Gynecology     | 1345        | 13534       |
| 7  | Ophthalmology                 | 579         | 490         |
| 8  | Orthopedics                   | 4956        | 4900        |
| 9  | Otolaryngology                | 615         | 1160        |
| 10 | Pathology                     | 881         | 797         |
| 11 | Pediatrics                    | 3265        | 2661        |
| 12 | Physical Medicine & Rehab     | -           | -           |
| 13 | Plastic Surgery               | -           | -           |
| 14 | Psychiatry                    | 2945        | 2520        |
| 15 | Radiation-Diagnostic/Oncology | 6489        | 5850        |
| 16 | Surgery                       | 2024        | 2341        |
| 17 | Urology                       | 1404        | 1633        |
| 18 |                               |             |             |
| 19 | <b>U01</b>                    | <b>2011</b> | <b>2012</b> |
| 20 | Anesthesiology                | 5732        | 5777        |
| 21 | Dermatology                   | 3607        | 2218        |
| 22 | Emergency Medicine            | 3398        | 2739        |
| 23 | Family Medicine               | 9686        | 7695        |
| 24 | Internal Medicine/Medicine    | 283         | 276         |
| 25 | Neurology                     | 391         | 326         |
| 26 | Neurosurgery                  | 841         | 1277        |
| 27 | Obstetrics and Gynecology     | 2692        | 2388        |
| 28 | Ophthalmology                 | 4486        | 2590        |
| 29 | Orthopedics                   | -           | -           |
| 30 | Otolaryngology                | 2308        | 2319        |
| 31 | Pathology                     | 277         | 266         |
| 32 | Pediatrics                    | 427         | 437         |
| 33 | Physical Medicine & Rehab     | 2126        | 2902        |
| 34 | Plastic Surgery               | -           | -           |
| 35 | Psychiatry                    | 722         | 434         |
| 36 | Radiation-Diagnostic/Oncology | 2318        | 1950        |
| 37 | Surgery                       | 516         | 486         |
| 38 | Urology                       | 702         | 653         |
| 39 |                               |             |             |
| 40 |                               |             |             |
| 41 |                               |             |             |
| 42 |                               |             |             |
| 43 |                               |             |             |
| 44 |                               |             |             |
| 45 |                               |             |             |
| 46 |                               |             |             |
| 47 |                               |             |             |
| 48 |                               |             |             |
| 49 |                               |             |             |
| 50 |                               |             |             |
| 51 |                               |             |             |
| 52 |                               |             |             |
| 53 |                               |             |             |
| 54 |                               |             |             |
| 55 |                               |             |             |
| 56 |                               |             |             |
| 57 |                               |             |             |
| 58 |                               |             |             |
| 59 |                               |             |             |
| 60 |                               |             |             |

**Supplementary Table 7: Total NIH training grant (F32, T32) funding in thousands of dolla**

| <b>F32</b>                    | <b>2011</b> | <b>2012</b> | <b>2013</b> |
|-------------------------------|-------------|-------------|-------------|
| Anesthesiology                | 192         | 309         | 397         |
| Dermatology                   | 173         | 223         | 156         |
| Emergency Medicine            | 59          | 54          | 62          |
| Family Medicine               | 0           | 0           | 0           |
| Internal Medicine/Medicine    | 6543        | 5803        | 5850        |
| Neurology                     | 732         | 449         | 964         |
| Neurosurgery                  | 421         | 365         | 338         |
| Obstetrics and Gynecology     | 209         | 290         | 175         |
| Ophthalmology                 | 180         | 351         | 385         |
| Orthopedics                   | 247         | 288         | 252         |
| Otolaryngology                | 527         | 384         | 355         |
| Pathology                     | 1141        | 865         | 955         |
| Pediatrics                    | 1339        | 1416        | 1246        |
| Physical Medicine & Rehab     | 51          | 52          | 0           |
| Plastic Surgery               | 0           | 0           | 0           |
| Psychiatry                    | 1921        | 1391        | 1318        |
| Radiation-Diagnostic/Oncology | 708         | 400         | 185         |
| Surgery                       | 831         | 760         | 662         |
| Urology                       | 116         | 106         | 111         |
|                               |             |             |             |
| <b>T32</b>                    | <b>2011</b> | <b>2012</b> | <b>2013</b> |
| Anesthesiology                | 2305        | 2641        | 2729        |
| Dermatology                   | 2246        | 2446        | 2263        |
| Emergency Medicine            | 0           | 0           | 0           |
| Family Medicine               | 1235        | 1172        | 1528        |
| Internal Medicine/Medicine    | 115016      | 115950      | 111668      |
| Neurology                     | 9544        | 8462        | 8315        |
| Neurosurgery                  | 592         | 531         | 582         |
| Obstetrics and Gynecology     | 2392        | 2382        | 2526        |
| Ophthalmology                 | 2879        | 3175        | 4438        |
| Orthopedics                   | 1751        | 2082        | 1823        |
| Otolaryngology                | 2477        | 3339        | 2847        |
| Pathology                     | 327477      | 291955      | 262466      |
| Pediatrics                    | 24470       | 24006       | 22657       |
| Physical Medicine & Rehab     | 1431        | 1068        | 1092        |
| Plastic Surgery               | 0           | 0           | 0           |
| Psychiatry                    | 20056       | 20663       | 20323       |
| Radiation-Diagnostic/Oncology | 5579        | 4095        | 4651        |

|         |       |       |       |
|---------|-------|-------|-------|
| Surgery | 12609 | 12273 | 11253 |
| Urology | 1084  | 1224  | 1151  |

**Supplementary Table 8: Total NIH career development grant (K01, K08, K23) funding in t**

| <b>K01</b>                    | <b>2011</b> | <b>2012</b> | <b>2013</b> |
|-------------------------------|-------------|-------------|-------------|
| Anesthesiology                | 480         | 485         | 463         |
| Dermatology                   | 375         | 467         | 596         |
| Emergency Medicine            | 0           | 136         | 134         |
| Family Medicine               | 1241        | 1561        | 1182        |
| Internal Medicine/Medicine    | 16576       | 15393       | 15612       |
| Neurology                     | 1619        | 1813        | 2313        |
| Neurosurgery                  | 298         | 241         | 127         |
| Obstetrics and Gynecology     | 279         | 171         | 313         |
| Ophthalmology                 | 0           | 0           | 0           |
| Orthopedics                   | 618         | 472         | 808         |
| Otolaryngology                | 274         | 274         | 274         |
| Pathology                     | 1538        | 1635        | 1698        |
| Pediatrics                    | 2485        | 2140        | 2285        |
| Physical Medicine & Rehab     | 344         | 365         | 489         |
| Plastic Surgery               | 0           | 0           | 0           |
| Psychiatry                    | 12041       | 12151       | 11042       |
| Radiation-Diagnostic/Oncology | 2091        | 1961        | 1517        |
| Surgery                       | 999         | 861         | 1240        |
| Urology                       | 106         | 106         | 106         |
|                               |             |             |             |
| <b>K08</b>                    | <b>2011</b> | <b>2012</b> | <b>2013</b> |
| Anesthesiology                | 1636        | 1831        | 2071        |
| Dermatology                   | 2225        | 2309        | 1938        |
| Emergency Medicine            | 283         | 568         | 875         |
| Family Medicine               | 611         | 616         | 678         |
| Internal Medicine/Medicine    | 37528       | 36346       | 33277       |
| Neurology                     | 6333        | 5782        | 6588        |
| Neurosurgery                  | 1160        | 1197        | 1446        |
| Obstetrics and Gynecology     | 1072        | 1077        | 952         |
| Ophthalmology                 | 4904        | 5063        | 5336        |
| Orthopedics                   | 179         | 269         | 519         |
| Otolaryngology                | 1995        | 2189        | 2122        |
| Pathology                     | 4861        | 4286        | 4572        |
| Pediatrics                    | 15014       | 13220       | 12960       |

|                               |             |             |             |
|-------------------------------|-------------|-------------|-------------|
| Physical Medicine & Rehab     | 125         | 125         | 125         |
| Plastic Surgery               | 0           | 0           | 0           |
| Psychiatry                    | 5684        | 5023        | 3287        |
| Radiation-Diagnostic/Oncology | 811         | 820         | 820         |
| Surgery                       | 7904        | 8045        | 6671        |
| Urology                       | 1217        | 1197        | 1391        |
|                               |             |             |             |
| <b>K23</b>                    | <b>2011</b> | <b>2012</b> | <b>2013</b> |
| Anesthesiology                | 1200        | 1558        | 1839        |
| Dermatology                   | 368         | 491         | 252         |
| Emergency Medicine            | 2344        | 2111        | 2311        |
| Family Medicine               | 1388        | 1256        | 901         |
| Internal Medicine/Medicine    | 44386       | 46176       | 45669       |
| Neurology                     | 8996        | 8961        | 7778        |
| Neurosurgery                  | 372         | 712         | 922         |
| Obstetrics and Gynecology     | 1602        | 1806        | 1387        |
| Ophthalmology                 | 2853        | 2347        | 2644        |
| Orthopedics                   | 337         | 391         | 320         |
| Otolaryngology                | 1485        | 1252        | 1235        |
| Pathology                     | 517         | 400         | 265         |
| Pediatrics                    | 12950       | 12743       | 12301       |
| Physical Medicine & Rehab     | 994         | 943         | 1511        |
| Plastic Surgery               | 0           | 0           | 0           |
| Psychiatry                    | 19068       | 18203       | 16841       |
| Radiation-Diagnostic/Oncology | 952         | 659         | 632         |
| Surgery                       | 1704        | 1671        | 1479        |
| Urology                       | 314         | 154         | 297         |

**Supplementary Table 9: Total NIH advanced career grant (R01, R03, R21, P30, U01) fund**

| <b>R01</b>                 | <b>2011</b> | <b>2012</b> | <b>2013</b> |
|----------------------------|-------------|-------------|-------------|
| Anesthesiology             | 74515       | 84338       | 81634       |
| Dermatology                | 39821       | 43881       | 41550       |
| Emergency Medicine         | 12119       | 12903       | 13802       |
| Family Medicine            | 37541       | 41499       | 36942       |
| Internal Medicine/Medicine | 1291238     | 1251856     | 1150256     |
| Neurology                  | 213323      | 221996      | 213488      |
| Neurosurgery               | 48188       | 50932       | 46894       |
| Obstetrics and Gynecology  | 50170       | 47030       | 47914       |
| Ophthalmology              | 143557      | 146741      | 143466      |
| Orthopedics                | 37635       | 40769       | 44058       |

|                               |             |             |             |
|-------------------------------|-------------|-------------|-------------|
| Otolaryngology                | 51992       | 55813       | 56307       |
| Pathology                     | 324176      | 318396      | 294584      |
| Pediatrics                    | 312475      | 336173      | 311585      |
| Physical Medicine & Rehab     | 11247       | 13076       | 13203       |
| Plastic Surgery               | 967         | 0           | 537         |
| Psychiatry                    | 470253      | 459342      | 406053      |
| Radiation-Diagnostic/Oncology | 205633      | 208397      | 202747      |
| Surgery                       | 146686      | 140198      | 127421      |
| Urology                       | 24013       | 25102       | 25021       |
|                               |             |             |             |
| <b>R03</b>                    | <b>2011</b> | <b>2012</b> | <b>2013</b> |
| Anesthesiology                | 450081      | 721092      | 442962      |
| Dermatology                   | 325896      | 415990      | 151115      |
| Emergency Medicine            | 63905       | 86342       | 68643       |
| Family Medicine               | 736834      | 719578      | 845671      |
| Internal Medicine/Medicine    | 9494800     | 11557791    | 10699669    |
| Neurology                     | 96465       | 656875      | 855875      |
| Neurosurgery                  | 39134       | 780722      | 767885      |
| Obstetrics and Gynecology     | 600862      | 864239      | 764424      |
| Ophthalmology                 | 0           | 0           | 0           |
| Orthopedics                   | 816678      | 787365      | 876856      |
| Otolaryngology                | 1718440     | 2272345     | 2379761     |
| Pathology                     | 1925448     | 1586299     | 1437747     |
| Pediatrics                    | 2921374     | 2413639     | 2699566     |
| Physical Medicine & Rehab     | 672323      | 544268      | 461397      |
| Plastic Surgery               | 0           | 0           | 0           |
| Psychiatry                    | 2652569     | 2711582     | 2647613     |
| Radiation-Diagnostic/Oncology | 783679      | 518000      | 742731      |
| Surgery                       | 1364197     | 1739046     | 1377657     |
| Urology                       | 78000       | 240620      | 153455      |
|                               |             |             |             |
| <b>R21</b>                    | <b>2011</b> | <b>2012</b> | <b>2013</b> |
| Anesthesiology                | 5363        | 4959        | 5614        |
| Dermatology                   | 3480        | 3878        | 3706        |
| Emergency Medicine            | 1418        | 1238        | 677         |
| Family Medicine               | 2736        | 3339        | 3520        |
| Internal Medicine/Medicine    | 77517       | 82201       | 76486       |
| Neurology                     | 12904       | 15721       | 14688       |
| Neurosurgery                  | 2414        | 3721        | 4435        |
| Obstetrics and Gynecology     | 6800        | 5278        | 5734        |
| Ophthalmology                 | 3884        | 3860        | 5863        |

|    |                               |             |             |             |
|----|-------------------------------|-------------|-------------|-------------|
| 1  |                               |             |             |             |
| 2  | Orthopedics                   | 2763        | 3619        | 3394        |
| 3  | Otolaryngology                | 2673        | 3242        | 4612        |
| 4  | Pathology                     | 24267       | 21316       | 22457       |
| 5  | Pediatrics                    | 19943       | 19426       | 19820       |
| 6  | Physical Medicine & Rehab     | 781         | 1430        | 2185        |
| 7  | Plastic Surgery               | 0           | 0           | 0           |
| 8  | Psychiatry                    | 25223       | 34861       | 38259       |
| 9  | Radiation-Diagnostic/Oncology | 20438       | 21778       | 20271       |
| 10 | Surgery                       | 11149       | 10662       | 8942        |
| 11 | Urology                       | 1626        | 1730        | 838         |
| 12 |                               |             |             |             |
| 13 |                               |             |             |             |
| 14 | <b>P30</b>                    | <b>2011</b> | <b>2012</b> | <b>2013</b> |
| 15 | Anesthesiology                | 0           | 0           | 0           |
| 16 | Dermatology                   | 5597        | 4335        | 6056        |
| 17 | Emergency Medicine            | 0           | 0           | 0           |
| 18 | Family Medicine               | 0           | 480         | 473         |
| 19 | Internal Medicine/Medicine    | 296235      | 320454      | 339482      |
| 20 | Neurology                     | 13644       | 15063       | 13998       |
| 21 | Neurosurgery                  | 1890        | 2651        | 2501        |
| 22 | Obstetrics and Gynecology     | 5801        | 5801        | 5158        |
| 23 | Ophthalmology                 | 18749       | 21609       | 17624       |
| 24 | Orthopedics                   | 2502        | 2510        | 2391        |
| 25 | Otolaryngology                | 4978        | 4832        | 4602        |
| 26 | Pathology                     | 24994       | 17233       | 36305       |
| 27 | Pediatrics                    | 26289       | 23223       | 22244       |
| 28 | Physical Medicine & Rehab     | 0           | 0           | 0           |
| 29 | Plastic Surgery               | 0           | 0           | 0           |
| 30 | Psychiatry                    | 17668       | 17159       | 19520       |
| 31 | Radiation-Diagnostic/Oncology | 2851        | 3786        | 4292        |
| 32 | Surgery                       | 25238       | 21484       | 24298       |
| 33 | Urology                       | 4835        | 4726        | 3941        |
| 34 |                               |             |             |             |
| 35 |                               |             |             |             |
| 36 | <b>U01</b>                    | <b>2011</b> | <b>2012</b> | <b>2013</b> |
| 37 | Anesthesiology                | 3304        | 3157        | 3516        |
| 38 | Dermatology                   | 810         | 2506        | 2458        |
| 39 | Emergency Medicine            | 18243       | 16875       | 8205        |
| 40 | Family Medicine               | 5269        | 8212        | 8912        |
| 41 | Internal Medicine/Medicine    | 394866      | 38472       | 42765       |
| 42 | Neurology                     | 61745       | 68819       | 71516       |
| 43 | Neurosurgery                  | 4610        | 4594        | 15655       |
| 44 | Obstetrics and Gynecology     | 25401       | 17051       | 5216        |
| 45 |                               |             |             |             |
| 46 |                               |             |             |             |
| 47 |                               |             |             |             |
| 48 |                               |             |             |             |
| 49 |                               |             |             |             |
| 50 |                               |             |             |             |
| 51 |                               |             |             |             |
| 52 |                               |             |             |             |
| 53 |                               |             |             |             |
| 54 |                               |             |             |             |
| 55 |                               |             |             |             |
| 56 |                               |             |             |             |
| 57 |                               |             |             |             |
| 58 |                               |             |             |             |
| 59 |                               |             |             |             |
| 60 |                               |             |             |             |



|                               |       |       |       |
|-------------------------------|-------|-------|-------|
| Ophthalmology                 | 2346  | 2450  | 1937  |
| Orthopedics                   | 0     | 0     | 522   |
| Otolaryngology                | 1413  | 830   | 1142  |
| Pathology                     | 45262 | 29680 | 27222 |
| Pediatrics                    | 98053 | 99346 | 91102 |
| Physical Medicine & Rehab     | 569   | 622   | 3799  |
| Plastic Surgery               | 0     | 0     | 0     |
| Psychiatry                    | 41548 | 58726 | 53470 |
| Radiation-Diagnostic/Oncology | 6629  | 8597  | 13873 |
| Surgery                       | 29433 | 39199 | 38813 |
| Urology                       | 13453 | 11343 | 11810 |
|                               |       |       |       |

**Supplementary Table 10: Dollar amount for each NIH training grant (F32, T32) spe**

| <b>F32</b>                    | <b>2011</b> | <b>2012</b> | <b>2013</b> |
|-------------------------------|-------------|-------------|-------------|
| Anesthesiology                | 4.78        | 7.64        | 9.74        |
| Dermatology                   | 16.02       | 20.11       | 13.69       |
| Emergency Medicine            | 1.74        | 1.52        | 1.67        |
| Family Medicine               | 0           | 0           | 0           |
| Internal Medicine/Medicine    | 60.00       | 52.73       | 52.68       |
| Neurology                     | 56.70       | 34.41       | 73.72       |
| Neurosurgery                  | 83.50       | 71.52       | 65.43       |
| Obstetrics and Gynecology     | 5.19        | 7.15        | 4.29        |
| Ophthalmology                 | 10.05       | 19.35       | 21.02       |
| Orthopedics                   | 12.45       | 14.72       | 13.01       |
| Otolaryngology                | 57.13       | 41.39       | 38.07       |
| Pathology                     | 76.21       | 60.31       | 69.66       |
| Pediatrics                    | 24.12       | 25.33       | 22.15       |
| Physical Medicine & Rehab     | 6.04        | 5.95        | 0           |
| Plastic Surgery               | 0           | 0           | 0           |
| Psychiatry                    | 50.17       | 36.82       | 35.34       |
| Radiation-Diagnostic/Oncology | 21.82       | 11.38       | 4.91        |
| Surgery                       | 31.58       | 29.51       | 26.28       |
| Urology                       | 11.85       | 10.83       | 11.39       |
|                               |             |             |             |
| <b>T32</b>                    | <b>2011</b> | <b>2012</b> | <b>2013</b> |
| Anesthesiology                | 57.45       | 65.31       | 66.96       |
| Dermatology                   | 207.61      | 220.53      | 199.12      |
| Emergency Medicine            | 0           | 0           | 0           |

|                               |         |         |         |
|-------------------------------|---------|---------|---------|
| Family Medicine               | 11.59   | 10.88   | 14.03   |
| Internal Medicine/Medicine    | 1054.73 | 1053.63 | 100.59  |
| Neurology                     | 738.92  | 649.11  | 632.01  |
| Neurosurgery                  | 117.21  | 104.03  | 112.52  |
| Obstetrics and Gynecology     | 59.25   | 58.68   | 61.87   |
| Ophthalmology                 | 160.46  | 175.12  | 242.27  |
| Orthopedics                   | 88.32   | 106.23  | 94.12   |
| Otolaryngology                | 268.30  | 359.98  | 305.44  |
| Pathology                     | 2186.81 | 2035.57 | 1914.38 |
| Pediatrics                    | 440.82  | 429.56  | 402.71  |
| Physical Medicine & Rehab     | 168.31  | 122.68  | 122.6   |
| Plastic Surgery               | 0       | 0       | 0       |
| Psychiatry                    | 523.79  | 546.74  | 544.91  |
| Radiation-Diagnostic/Oncology | 171.95  | 116.67  | 123.22  |
| Surgery                       | 479.19  | 476.61  | 446.78  |
| Urology                       | 110.36  | 124.87  | 117.82  |

**Supplementary Table 11: Dollar amount for each NIH career development grant (K01)**

| <b>K01</b>                    | <b>2011</b> | <b>2012</b> | <b>2013</b> |
|-------------------------------|-------------|-------------|-------------|
| Anesthesiology                | 11.97       | 11.98       | 11.36       |
| Dermatology                   | 34.67       | 42.10       | 52.45       |
| Emergency Medicine            | 0           | 3.83        | 3.60        |
| Family Medicine               | 11.65       | 14.49       | 10.85       |
| Internal Medicine/Medicine    | 152.01      | 139.88      | 140.59      |
| Neurology                     | 125.34      | 139.07      | 175.80      |
| Neurosurgery                  | 59.06       | 47.18       | 24.49       |
| Obstetrics and Gynecology     | 6.92        | 4.21        | 7.66        |
| Ophthalmology                 | 0           | 0           | 0           |
| Orthopedics                   | 31.17       | 24.07       | 41.73       |
| Otolaryngology                | 29.72       | 29.58       | 29.44       |
| Pathology                     | 102.72      | 114.00      | 123.82      |
| Pediatrics                    | 44.76       | 38.30       | 40.61       |
| Physical Medicine & Rehab     | 40.44       | 41.98       | 54.95       |
| Plastic Surgery               | 0           | 0           | 0           |
| Psychiatry                    | 314.48      | 321.51      | 296.05      |
| Radiation-Diagnostic/Oncology | 64.43       | 55.86       | 40.20       |
| Surgery                       | 37.96       | 33.43       | 49.24       |
| Urology                       | 10.77       | 10.80       | 10.83       |
|                               |             |             |             |
| <b>K08</b>                    | <b>2011</b> | <b>2012</b> | <b>2013</b> |

|                               |             |             |             |
|-------------------------------|-------------|-------------|-------------|
| Anesthesiology                | 40.78       | 45.27       | 50.82       |
| Dermatology                   | 205.68      | 208.13      | 170.54      |
| Emergency Medicine            | 8.33        | 15.95       | 23.50       |
| Family Medicine               | 5.73        | 5.72        | 6.22        |
| Internal Medicine/Medicine    | 344.14      | 330.28      | 299.67      |
| Neurology                     | 490.32      | 443.51      | 500.72      |
| Neurosurgery                  | 229.79      | 234.21      | 279.63      |
| Obstetrics and Gynecology     | 26.56       | 26.52       | 23.33       |
| Ophthalmology                 | 273.33      | 279.28      | 291.34      |
| Orthopedics                   | 9.04        | 13.71       | 26.79       |
| Otolaryngology                | 216.07      | 235.99      | 227.68      |
| Pathology                     | 324.60      | 298.86      | 333.48      |
| Pediatrics                    | 270.48      | 236.56      | 230.35      |
| Physical Medicine & Rehab     | 14.69       | 14.35       | 14.03       |
| Plastic Surgery               | 0           | 0           | 0           |
| Psychiatry                    | 148.44      | 132.90      | 88.13       |
| Radiation-Diagnostic/Oncology | 25.01       | 23.36       | 21.72       |
| Surgery                       | 300.38      | 312.41      | 264.84      |
| Urology                       | 123.84      | 122.20      | 142.34      |
|                               |             |             |             |
| <b>K23</b>                    | <b>2011</b> | <b>2012</b> | <b>2013</b> |
| Anesthesiology                | 29.91       | 38.53       | 45.12       |
| Dermatology                   | 33.98       | 44.24       | 22.18       |
| Emergency Medicine            | 68.98       | 59.28       | 62.06       |
| Family Medicine               | 13.02       | 11.66       | 8.27        |
| Internal Medicine/Medicine    | 407.03      | 419.60      | 411.26      |
| Neurology                     | 696.50      | 687.37      | 591.24      |
| Neurosurgery                  | 73.70       | 139.35      | 178.37      |
| Obstetrics and Gynecology     | 39.68       | 44.49       | 33.98       |
| Ophthalmology                 | 159.02      | 129.45      | 144.34      |
| Orthopedics                   | 17.02       | 19.94       | 16.53       |
| Otolaryngology                | 160.86      | 134.92      | 132.49      |
| Pathology                     | 34.49       | 27.91       | 19.31       |
| Pediatrics                    | 233.29      | 228.02      | 218.64      |
| Physical Medicine & Rehab     | 116.92      | 108.31      | 169.68      |
| Plastic Surgery               | 0           | 0           | 0           |
| Psychiatry                    | 498.00      | 481.66      | 451.55      |
| Radiation-Diagnostic/Oncology | 29.33       | 18.78       | 16.73       |
| Surgery                       | 64.76       | 64.88       | 58.74       |
| Urology                       | 31.99       | 15.71       | 30.39       |

**Supplementary Table 12: Dollar amount for each NIH advanced career grant (R01, R03, R**

| <b>R01</b>                    | <b>2011</b> | <b>2012</b> | <b>2013</b> |
|-------------------------------|-------------|-------------|-------------|
| Anesthesiology                | 1857.17     | 2085.47     | 2002.89     |
| Dermatology                   | 3680.31     | 3956.23     | 3656.59     |
| Emergency Medicine            | 356.59      | 362.32      | 370.61      |
| Family Medicine               | 352.34      | 385.20      | 339.17      |
| Internal Medicine/Medicine    | 11841.01    | 11375.60    | 10358.28    |
| Neurology                     | 16516.17    | 17029.48    | 16227.40    |
| Neurosurgery                  | 9547.89     | 9969.06     | 9068.75     |
| Obstetrics and Gynecology     | 1242.54     | 1158.34     | 1173.61     |
| Ophthalmology                 | 8000.73     | 8093.83     | 7832.38     |
| Orthopedics                   | 1898.66     | 2080.26     | 2274.09     |
| Otolaryngology                | 5631.72     | 6016.96     | 6041.57     |
| Pathology                     | 21647.85    | 22199.46    | 21486.80    |
| Pediatrics                    | 5629.26     | 6015.39     | 5538.10     |
| Physical Medicine & Rehab     | 1322.77     | 1502.20     | 1482.51     |
| Plastic Surgery               | 141.77      | 0           | 77.41       |
| Psychiatry                    | 12281.68    | 12154.31    | 10887.32    |
| Radiation-Diagnostic/Oncology | 6337.90     | 5937.65     | 5370.79     |
| Surgery                       | 5574.43     | 5444.49     | 5059.00     |
| Urology                       | 2443.77     | 2561.83     | 2560.75     |
|                               |             |             |             |
| <b>R03</b>                    | <b>2011</b> | <b>2012</b> | <b>2013</b> |
| Anesthesiology                | 11.22       | 17.83       | 10.87       |
| Dermatology                   | 30.12       | 37.51       | 13.3        |
| Emergency Medicine            | 1.88        | 2.42        | 1.84        |
| Family Medicine               | 6.92        | 6.68        | 7.76        |
| Internal Medicine/Medicine    | 87.07       | 105.03      | 96.35       |
| Neurology                     | 74.68       | 50.39       | 65.06       |
| Neurosurgery                  | 77.53       | 152.81      | 148.5       |
| Obstetrics and Gynecology     | 14.88       | 21.29       | 18.72       |
| Ophthalmology                 | 0           | 0           | 0           |
| Orthopedics                   | 41.2        | 40.18       | 45.26       |
| Otolaryngology                | 186.14      | 244.97      | 255.34      |
| Pathology                     | 128.58      | 110.6       | 104.87      |
| Pediatrics                    | 52.63       | 43.19       | 47.98       |
| Physical Medicine & Rehab     | 79.07       | 62.53       | 51.81       |
| Plastic Surgery               | 0           | 0           | 0           |
| Psychiatry                    | 69.28       | 71.75       | 70.99       |

|                               |             |             |             |
|-------------------------------|-------------|-------------|-------------|
| Radiation-Diagnostic/Oncology | 24.15       | 14.76       | 19.67       |
| Surgery                       | 51.84       | 67.53       | 54.7        |
| Urology                       | 7.94        | 24.56       | 15.71       |
|                               |             |             |             |
| <b>R21</b>                    | <b>2011</b> | <b>2012</b> | <b>2013</b> |
| Anesthesiology                | 133.66      | 122.64      | 137.74      |
| Dermatology                   | 321.61      | 349.67      | 326.15      |
| Emergency Medicine            | 41.72       | 34.77       | 18.18       |
| Family Medicine               | 25.67       | 30.99       | 32.31       |
| Internal Medicine/Medicine    | 710.85      | 746.96      | 688.77      |
| Neurology                     | 999.05      | 1205.96     | 1116.44     |
| Neurosurgery                  | 478.39      | 728.36      | 857.71      |
| Obstetrics and Gynecology     | 168.40      | 129.99      | 140.44      |
| Ophthalmology                 | 216.49      | 212.90      | 320.06      |
| Orthopedics                   | 139.37      | 184.67      | 175.17      |
| Otolaryngology                | 289.56      | 349.50      | 494.81      |
| Pathology                     | 1620.52     | 1486.19     | 1638.03     |
| Pediatrics                    | 359.27      | 347.60      | 352.27      |
| Physical Medicine & Rehab     | 91.84       | 164.28      | 245.29      |
| Plastic Surgery               | 0           | 0           | 0           |
| Psychiatry                    | 658.75      | 922.43      | 1025.81     |
| Radiation-Diagnostic/Oncology | 629.93      | 620.50      | 536.98      |
| Surgery                       | 423.69      | 414.06      | 355.02      |
| Urology                       | 165.44      | 176.52      | 85.77       |
|                               |             |             |             |
| <b>P30</b>                    | <b>2011</b> | <b>2012</b> | <b>2013</b> |
| Anesthesiology                | 0           | 0           | 0           |
| Dermatology                   | 517.27      | 390.85      | 532.97      |
| Emergency Medicine            | 0           | 0           | 0           |
| Family Medicine               | 0           | 4.46        | 4.35        |
| Internal Medicine/Medicine    | 2716.56     | 2911.97     | 3057.10     |
| Neurology                     | 1056.37     | 1155.52     | 1063.93     |
| Neurosurgery                  | 374.49      | 518.96      | 483.66      |
| Obstetrics and Gynecology     | 143.68      | 142.88      | 126.34      |
| Ophthalmology                 | 1044.94     | 1191.91     | 962.15      |
| Orthopedics                   | 126.20      | 128.06      | 123.40      |
| Otolaryngology                | 539.17      | 520.92      | 493.72      |
| Pathology                     | 1669.05     | 1201.52     | 2648.08     |
| Pediatrics                    | 473.59      | 415.55      | 395.36      |
| Physical Medicine & Rehab     | 0           | 0           | 0           |
| Psychiatry                    | 461.43      | 454.04      | 523.37      |

|                               |             |             |             |
|-------------------------------|-------------|-------------|-------------|
| Radiation-Diagnostic/Oncology | 87.87       | 107.87      | 113.69      |
| Surgery                       | 959.11      | 834.32      | 964.72      |
| Urology                       | 492.04      | 482.37      | 403.34      |
|                               |             |             |             |
| <b>U01</b>                    | <b>2011</b> | <b>2012</b> | <b>2013</b> |
| Anesthesiology                | 82.34       | 78.08       | 86.27       |
| Dermatology                   | 74.83       | 225.95      | 216.31      |
| Emergency Medicine            | 536.81      | 473.85      | 220.31      |
| Family Medicine               | 49.45       | 76.23       | 81.82       |
| Internal Medicine/Medicine    | 3621.03     | 3495.78     | 3850.67     |
| Neurology                     | 4780.51     | 5279.12     | 5436.02     |
| Neurosurgery                  | 913.42      | 899.29      | 3027.48     |
| Obstetrics and Gynecology     | 629.11      | 419.96      | 127.76      |
| Ophthalmology                 | 130.77      | 135.16      | 105.76      |
| Orthopedics                   | 0           | 0           | 26.92       |
| Otolaryngology                | 153.02      | 89.48       | 122.50      |
| Pathology                     | 3022.5      | 2069.4      | 1985.57     |
| Pediatrics                    | 1766.44     | 1777.68     | 1619.25     |
| Physical Medicine & Rehab     | 66.88       | 71.50       | 426.53      |
| Plastic Surgery               | 0           | 0           | 0           |
| Psychiatry                    | 1085.13     | 1553.90     | 1433.67     |
| Radiation-Diagnostic/Oncology | 204.33      | 244.96      | 367.51      |
| Surgery                       | 1118.53     | 1522.26     | 1540.99     |
| Urology                       | 1369.09     | 1157.66     | 1208.71     |
|                               |             |             |             |

**Supplementary Table 13: Mean NIH training grant (F32, T32) funding amount from**

| <b>F32</b>                 | <b>2011</b> | <b>2012</b> | <b>2013</b> |
|----------------------------|-------------|-------------|-------------|
| Anesthesiology             | 47,914.25   | 51,490.00   | 49,633.25   |
| Dermatology                | 43,343.50   | 55,754.00   | 51,857.67   |
| Emergency Medicine         | 59,234.00   | 54,033.00   | 62,234.00   |
| Family Medicine            | -           | -           | -           |
| Internal Medicine/Medicine | 51,926.46   | 51,811.16   | 50,429.82   |
| Neurology                  | 48,824.33   | 44,860.50   | 48,197.95   |
| Neurosurgery               | 52,676.12   | 45,676.25   | 42,293.62   |
| Obstetrics and Gynecology  | 52,343.00   | 48,368.00   | 43,787.75   |
| Ophthalmology              | 45,094.75   | 50,123.71   | 55,008.00   |
| Orthopedics                | 49,338.00   | 48,075.67   | 50,392.60   |
| Otolaryngology             | 52,747.00   | 54,843.71   | 50,681.71   |

|                                |             |             |             |
|--------------------------------|-------------|-------------|-------------|
| Pathology                      | 51,873.14   | 50,886.24   | 43,413.09   |
| Pediatrics                     | 53,559.40   | 52,427.22   | 51,929.29   |
| Physical Medicine & Rehab      | 51,326.00   | 51,821.00   | -           |
| Plastic Surgery                | -           | -           | -           |
| Psychiatry                     | 49,255.31   | 47,980.59   | 47,068.46   |
| Radiation-Diagnostic/Oncology  | 50,566.64   | 49,940.50   | 37,040.60   |
| Surgery                        | 48,888.53   | 50,666.33   | 50,921.23   |
| Urology                        | 58,202.00   | 53,066.00   | 55,670.00   |
|                                |             |             |             |
| <b>T32</b>                     | <b>2011</b> | <b>2012</b> | <b>2013</b> |
| Anesthesiology                 | 177,313.40  | 176,064.90  | 194,942.40  |
| Dermatology                    | 187,196.80  | 203,836.20  | 188,549.20  |
| Emergency Medicine             | -           | -           | -           |
| Family Medicine                | 246,991.00  | 292,899.00  | 254,736.30  |
| Internal Medicine/ Medicine    | 301,089.20  | 298,071.10  | 312,795.30  |
| Neurology                      | 257,944.60  | 248,875.60  | 259,835.60  |
| Neurosurgery                   | 197,192.30  | 177,160.70  | 193,940.30  |
| Obstetrics and Gynecology      | 199,358.80  | 216,580.20  | 210,501.20  |
| Ophthalmology                  | 191,942.20  | 198,428.80  | 211,319.40  |
| Orthopedics                    | 218,841.90  | 231,324.10  | 227,927.00  |
| Otolaryngology                 | 206,410.50  | 278,268.20  | 258,790.70  |
| Pathology                      | 380,784.30  | 389,268.50  | 374,945.80  |
| Pediatrics                     | 226,569.60  | 242,487.10  | 251,749.30  |
| Physical Medicine & Rehab      | 159,013.20  | 266,958.20  | 272,975.00  |
| Plastic Surgery                | -           | -           | -           |
| Psychiatry                     | 260,461.80  | 261,552.40  | 254,036.70  |
| Radiation-Diagnostic/ Oncology | 253,584.50  | 204,744.00  | 211,428.10  |
| Surgery                        | 233,508.00  | 219,160.50  | 208,387.80  |
| Urology                        | 154,911.30  | 152,947.90  | 164,463.90  |

**Supplementary Table 14: Mean NIH career development grant (K01, K08, K223) funding :**

| <b>K01</b>                  | <b>2011</b> | <b>2012</b> | <b>2013</b> |
|-----------------------------|-------------|-------------|-------------|
| Anesthesiology              | 120,086.20  | 121,151.50  | 115,788.80  |
| Dermatology                 | 93,785.25   | 116,732.20  | 99,330.00   |
| Emergency Medicine          | -           | 136,304.00  | 134,016.00  |
| Family Medicine             | 112,845.90  | 120,051.80  | 118,157.40  |
| Internal Medicine/ Medicine | 127,509.60  | 123,147.00  | 123,903.40  |
| Neurology                   | 134,905.80  | 139,454.80  | 144,548.50  |
| Neurosurgery                | 99,353.33   | 80,347.00   | 126,644.00  |



|    |                                |             |             |             |
|----|--------------------------------|-------------|-------------|-------------|
| 1  |                                |             |             |             |
| 2  | Obstetrics and Gynecology      | 139,635.50  | 171,026.00  | 156,377.50  |
| 3  | Ophthalmology                  | -           | -           | -           |
| 4  |                                |             |             |             |
| 5  | Orthopedics                    | 123,579.60  | 117,938.50  | 115,494.70  |
| 6  | Otolaryngology                 | 137,182.00  | 137,182.00  | 137,188.00  |
| 7  |                                |             |             |             |
| 8  | Pathology                      | 118,330.60  | 116,786.60  | 113,168.80  |
| 9  | Pediatrics                     | 124,242.00  | 133,766.00  | 126,937.50  |
| 10 |                                |             |             |             |
| 11 | Physical Medicine & Rehab      | 114,634.30  | 91,353.75   | 122,354.20  |
| 12 | Plastic Surgery                | -           | -           | -           |
| 13 |                                |             |             |             |
| 14 | Psychiatry                     | 148,655.30  | 144,651.20  | 145,283.70  |
| 15 | Radiation-Diagnostic/ Oncology | 122,974.40  | 130,706.80  | 116,722.90  |
| 16 |                                |             |             |             |
| 17 | Surgery                        | 124,855.50  | 122,972.90  | 112,757.30  |
| 18 | Urology                        | 105,823.00  | 105,823.00  | 105,823.00  |
| 19 |                                |             |             |             |
| 20 |                                |             |             |             |
| 21 | <b>K08</b>                     | <b>2011</b> | <b>2012</b> | <b>2013</b> |
| 22 |                                |             |             |             |
| 23 | Anesthesiology                 | 125,868.50  | 130,766.60  | 138,082.60  |
| 24 | Dermatology                    | 123,634.20  | 121,501.10  | 113,992.10  |
| 25 |                                |             |             |             |
| 26 | Emergency Medicine             | 141,586.00  | 142,015.50  | 125,040.90  |
| 27 | Family Medicine                | 122,205.80  | 123,184.80  | 135,554.20  |
| 28 |                                |             |             |             |
| 29 | Internal Medicine/ Medicine    | 135,478.30  | 134,615.70  | 136,943.70  |
| 30 | Neurology                      | 162,383.80  | 160,599.20  | 168,910.60  |
| 31 |                                |             |             |             |
| 32 | Neurosurgery                   | 165,681.90  | 170,939.90  | 160,663.30  |
| 33 | Obstetrics and Gynecology      | 134,050.10  | 134,579.40  | 136,049.00  |
| 34 | Ophthalmology                  | 204,350.20  | 210,972.40  | 184,014.60  |
| 35 |                                |             |             |             |
| 36 | Orthopedics                    | 179,280.00  | 134,364.00  | 129,774.80  |
| 37 | Otolaryngology                 | 166,228.00  | 156,362.90  | 176,830.70  |
| 38 |                                |             |             |             |
| 39 | Pathology                      | 127,919.40  | 129,889.90  | 127,000.10  |
| 40 | Pediatrics                     | 131,701.80  | 137,711.50  | 139,356.10  |
| 41 |                                |             |             |             |
| 42 | Physical Medicine & Rehab      | 124,929.00  | 124,929.00  | 124,929.00  |
| 43 | Plastic Surgery                | -           | -           | -           |
| 44 |                                |             |             |             |
| 45 | Psychiatry                     | 167,165.70  | 162,011.70  | 156,512.70  |
| 46 | Radiation-Diagnostic/ Oncology | 162,287.60  | 163,995.20  | 163,995.20  |
| 47 |                                |             |             |             |
| 48 | Surgery                        | 133,971.00  | 141,133.80  | 133,410.60  |
| 49 | Urology                        | 152,109.50  | 149,671.80  | 126,433.20  |
| 50 |                                |             |             |             |
| 51 |                                |             |             |             |
| 52 | <b>K23</b>                     | <b>2011</b> | <b>2012</b> | <b>2013</b> |
| 53 |                                |             |             |             |
| 54 | Anesthesiology                 | 133,340.70  | 155,830.60  | 141,449.70  |
| 55 | Dermatology                    | 122,563.30  | 122,675.50  | 83,995.33   |
| 56 |                                |             |             |             |
| 57 | Emergency Medicine             | 130,236.80  | 140,747.70  | 154,086.90  |
| 58 | Family Medicine                | 154,195.60  | 156,956.10  | 150,109.50  |
| 59 | Internal Medicine/ Medicine    | 145,051.40  | 146,590.90  | 149,245.80  |
| 60 | Neurology                      | 147,474.40  | 151,874.90  | 162,050.10  |



|                                |            |            |            |
|--------------------------------|------------|------------|------------|
| Neurosurgery                   | 185,974    | 177,987.20 | 184,467.40 |
| Obstetrics and Gynecology      | 133,524.90 | 129,024.90 | 126,127.10 |
| Ophthalmology                  | 190,213.70 | 213,359    | 203,372.30 |
| Orthopedics                    | 168,729.00 | 130,244.00 | 106,738.00 |
| Otolaryngology                 | 185,635.10 | 208,591.80 | 205,798.00 |
| Pathology                      | 129,132    | 133,431.30 | 132,375    |
| Pediatrics                     | 137,762.10 | 137,020.20 | 138,214.20 |
| Physical Medicine & Rehab      | 142,022.90 | 157,135.50 | 151,114.80 |
| Plastic Surgery                | -          | -          | -          |
| Psychiatry                     | 160,234.10 | 155,582.30 | 161,932.10 |
| Radiation-Diagnostic/ Oncology | 158,602.70 | 164,772.20 | 157,904.80 |
| Surgery                        | 131,087.50 | 139,226.80 | 134,489.40 |
| Urology                        | 157,160    | 153,943.00 | 148,464.50 |

**Supplementary Table 15: Mean NIH advanced career grant (R01, R03, R21,P30, U01) fund**

| <b>R01</b>                     | <b>2011</b> | <b>2012</b> | <b>2013</b> |
|--------------------------------|-------------|-------------|-------------|
| Anesthesiology                 | 374,447.70  | 394,100.80  | 381,465.50  |
| Dermatology                    | 346,269.00  | 353,875.30  | 329,760.60  |
| Emergency Medicine             | 466,096.40  | 430,106.60  | 460,062.20  |
| Family Medicine                | 487,546.90  | 488,225.60  | 486,072.70  |
| Internal Medicine/ Medicine    | 397,304.00  | 402,009.00  | 394,328.30  |
| Neurology                      | 410,236.30  | 402,897.10  | 396,817.20  |
| Neurosurgery                   | 349,190.00  | 361,219.40  | 334,960.60  |
| Obstetrics and Gynecology      | 346,000.80  | 353,612.00  | 344,703.60  |
| Ophthalmology                  | 422,226.60  | 405,362.00  | 408,734.00  |
| Orthopedics                    | 339,055.70  | 342,596.00  | 328,792.10  |
| Otolaryngology                 | 366,140.90  | 374,585.90  | 354,134.70  |
| Pathology                      | 349,328.10  | 361,402.70  | 346,162.30  |
| Pediatrics                     | 406,339.10  | 418,646.40  | 401,010.10  |
| Physical Medicine & Rehab      | 362,821.50  | 373,596.10  | 400,098.60  |
| Plastic Surgery                | 322,374.70  | -           | 537,402.00  |
| Psychiatry                     | 465,597.40  | 463,981.70  | 449,174.00  |
| Radiation-Diagnostic/ Oncology | 388,720.60  | 403,869.50  | 385,450.80  |
| Surgery                        | 355,171.00  | 359,483.10  | 345,314.60  |
| Urology                        | 307,852.70  | 326,001.30  | 301,458.50  |
|                                |             |             |             |
| <b>R03</b>                     | <b>2011</b> | <b>2012</b> | <b>2013</b> |
| Anesthesiology                 | 75,013.50   | 80,121.33   | 73,827.00   |
| Dermatology                    | 65,179.20   | 69,331.67   | 75,557.50   |

|    |                                |             |             |             |
|----|--------------------------------|-------------|-------------|-------------|
| 1  |                                |             |             |             |
| 2  | Emergency Medicine             | 63,905.00   | 86,342.00   | 68,643.00   |
| 3  | Family Medicine                | 92,104.25   | 79,953.11   | 93,963.44   |
| 4  | Internal Medicine/ Medicine    | 80,464.41   | 83,149.58   | 81,058.10   |
| 5  | Neurology                      | 96,460.50   | 72,986.11   | 77,806.82   |
| 6  | Neurosurgery                   | 130,434.70  | 97,590.25   | 95,985.62   |
| 7  | Obstetrics and Gynecology      | 75,107.75   | 72,019.92   | 76,442.40   |
| 8  | Ophthalmology                  | -           | -           | -           |
| 9  | Orthopedics                    | 81,667.80   | 78,736.50   | 73,071.33   |
| 10 | Otolaryngology                 | 132,187.70  | 126,241.40  | 125,250.60  |
| 11 | Pathology                      | 77,017.92   | 68,969.52   | 68,464.14   |
| 12 | Pediatrics                     | 76,878.26   | 83,228.93   | 77,130.46   |
| 13 | Physical Medicine & Rehab      | 96,047.43   | 77,752.57   | 92,279.40   |
| 14 | Plastic Surgery                | -           | -           | -           |
| 15 | Psychiatry                     | 106,102.80  | 96,842.21   | 88,253.77   |
| 16 | Radiation-Diagnostic/ Oncology | 97,959.88   | 74,000.00   | 74,273.10   |
| 17 | Surgery                        | 90,946.47   | 86,952.30   | 81,038.65   |
| 18 | Urology                        | 78,000.00   | 80,206.67   | 76,727.50   |
| 19 |                                |             |             |             |
| 20 | <b>R21</b>                     | <b>2011</b> | <b>2012</b> | <b>2013</b> |
| 21 | Anesthesiology                 | 198,626.80  | 206,645.70  | 207,925.40  |
| 22 | Dermatology                    | 183,150.90  | 215,467.50  | 205,891.90  |
| 23 | Emergency Medicine             | 236,297.20  | 247,628.80  | 225,641.70  |
| 24 | Family Medicine                | 195,393.30  | 208,657.20  | 185,239.90  |
| 25 | Internal Medicine/ Medicine    | 206,711.70  | 201,968.50  | 194,621.30  |
| 26 | Neurology                      | 201,619.80  | 201,549.90  | 201,204.50  |
| 27 | Neurosurgery                   | 185,724.80  | 206,732.60  | 201,600.70  |
| 28 | Obstetrics and Gynecology      | 206,047.70  | 188,485.70  | 212,358.60  |
| 29 | Ophthalmology                  | 184,974.60  | 203,152.80  | 195,418.10  |
| 30 | Orthopedics                    | 197,322.00  | 180,957.80  | 178,617.30  |
| 31 | Otolaryngology                 | 190,945.80  | 202,619.80  | 219,600.80  |
| 32 | Pathology                      | 195,703.40  | 204,958.00  | 200,512.00  |
| 33 | Pediatrics                     | 191,759.30  | 204,481.70  | 194,309.80  |
| 34 | Physical Medicine & Rehab      | 195,226.20  | 204,276.70  | 198,593.80  |
| 35 | Plastic Surgery                | -           | -           | -           |
| 36 | Psychiatry                     | 206,745.70  | 210,005.50  | 200,307.60  |
| 37 | Radiation-Diagnostic/ Oncology | 210,700.90  | 215,624.70  | 198,734.30  |
| 38 | Surgery                        | 192,224.20  | 197,450.10  | 194,389.40  |
| 39 | Urology                        | 203,200.80  | 192,179.90  | 167,621.00  |
| 40 |                                |             |             |             |
| 41 | <b>P30</b>                     | <b>2011</b> | <b>2012</b> | <b>2013</b> |
| 42 | Anesthesiology                 | -           | -           | -           |
| 43 | Dermatology                    | 508,803.50  | 541,894.10  | 757,022.80  |
| 44 | Emergency Medicine             | -           | -           | -           |
| 45 |                                |             |             |             |

|    |                               |              |              |              |
|----|-------------------------------|--------------|--------------|--------------|
| 1  |                               |              |              |              |
| 2  | Family Medicine               | -            | 119,990.50   | 118,347.00   |
| 3  | Internal Medicine/ Medicine   | 1,322,479.00 | 1,476,749.00 | 1,647,969.00 |
| 4  | Neurology                     | 909,600.70   | 792,808.50   | 874,868.00   |
| 5  | Neurosurgery                  | 945,027.00   | 883,790.30   | 833,661.70   |
| 6  | Obstetrics and Gynecology     | 1,933,778.00 | 1,933,777.00 | 2,578,935.00 |
| 7  | Ophthalmology                 | 604,815.60   | 584,035.50   | 587,455.10   |
| 8  | Orthopedics                   | 625,387.50   | 627,439.20   | 597,681.80   |
| 9  | Otolaryngology                | 622,200.80   | 604,010.00   | 657,359.40   |
| 10 | Pathology                     | 1,470,235.00 | 957,377.10   | 1,815,262.00 |
| 11 | Pediatrics                    | 1,546,389.00 | 1,105,870.00 | 967,114.30   |
| 12 | Physical Medicine & Rehab     | -            | -            | -            |
| 13 | Plastic Surgery               | -            | -            | -            |
| 14 | Psychiatry                    | 1,359,067.00 | 1,143,958.00 | 1,148,220.00 |
| 15 | Radiation-Diagnostic/Oncology | 570,185.40   | 631,016.30   | 858,373.40   |
| 16 | Surgery                       | 1,941,337.00 | 1,953,115.00 | 1,619,891.00 |
| 17 | Urology                       | 690,688.70   | 787,747.80   | 788,214.80   |
| 18 |                               |              |              |              |
| 19 |                               |              |              |              |
| 20 | <b>U01</b>                    | <b>2011</b>  | <b>2012</b>  | <b>2013</b>  |
| 21 | Anesthesiology                | 471,964.90   | 451,071.30   | 502,329.90   |
| 22 | Dermatology                   | 269,879.00   | 501,225.00   | 351,136.30   |
| 23 | Emergency Medicine            | 1,824,301.00 | 1,298,730.00 | 482,628.40   |
| 24 | Family Medicine               | 478,966.10   | 586,568.90   | 742,643.20   |
| 25 | Internal Medicine/ Medicine   | 1,022,969.00 | 964,165.60   | 989,827.10   |
| 26 | Neurology                     | 1,871,063.00 | 1,720,465.00 | 1,787,908.00 |
| 27 | Neurosurgery                  | 768,340.80   | 1,148,616.00 | 1,956,889.00 |
| 28 | Obstetrics and Gynecology     | 1,693,429.00 | 1,003,004.00 | 651,969.90   |
| 29 | Ophthalmology                 | 586,612.20   | 350,067.90   | 387,425.60   |
| 30 | Orthopedics                   | -            | -            | 521,639.00   |
| 31 | Otolaryngology                | 353,177.20   | 207,493.50   | 380,567.70   |
| 32 | Pathology                     | 838,184.80   | 549,637.20   | 591,787.10   |
| 33 | Pediatrics                    | 754,255.50   | 776,144.10   | 785,361.80   |
| 34 | Physical Medicine & Rehab     | 142,161.00   | 207,461.00   | 542,662.10   |
| 35 | Plastic Surgery               | -            | -            | -            |
| 36 | Psychiatry                    | 783,933.80   | 675,010.60   | 676,836.10   |
| 37 | Radiation-Diagnostic/Oncology | 473,532.00   | 477,637.40   | 630,609.80   |
| 38 | Surgery                       | 577,115.30   | 739,604.80   | 680,929.60   |
| 39 | Urology                       | 960,907.90   | 756,219.90   | 694,723.70   |
| 40 |                               |              |              |              |
| 41 |                               |              |              |              |
| 42 |                               |              |              |              |
| 43 |                               |              |              |              |
| 44 |                               |              |              |              |
| 45 |                               |              |              |              |
| 46 |                               |              |              |              |
| 47 |                               |              |              |              |
| 48 |                               |              |              |              |
| 49 |                               |              |              |              |
| 50 |                               |              |              |              |
| 51 |                               |              |              |              |
| 52 |                               |              |              |              |
| 53 |                               |              |              |              |
| 54 |                               |              |              |              |
| 55 |                               |              |              |              |
| 56 |                               |              |              |              |
| 57 |                               |              |              |              |
| 58 |                               |              |              |              |
| 59 |                               |              |              |              |
| 60 |                               |              |              |              |

## 2011-2020 by specialty

|  | 2014 | 2015 | 2016 | 2017 | 2018 | 2019 |
|--|------|------|------|------|------|------|
|  | 7    | 1    | 1    | 3    | 5    | 2    |
|  | 2    | 3    | 3    | 5    | 4    | 1    |
|  | 0    | 0    | 0    | 0    | 0    | 0    |
|  | 1    | 1    | 0    | 0    | 0    | 0    |
|  | 108  | 109  | 119  | 132  | 115  | 108  |
|  | 31   | 29   | 23   | 29   | 27   | 29   |
|  | 8    | 10   | 10   | 9    | 15   | 8    |
|  | 4    | 5    | 4    | 3    | 6    | 5    |
|  | 9    | 12   | 8    | 10   | 7    | 9    |
|  | 5    | 6    | 6    | 6    | 7    | 7    |
|  | 10   | 6    | 8    | 14   | 10   | 8    |
|  | 22   | 23   | 25   | 24   | 17   | 16   |
|  | 24   | 18   | 17   | 15   | 13   | 19   |
|  | 1    | 1    | 1    | 3    | 4    | 3    |
|  | 0    | 0    | 0    | 0    | 0    | 1    |
|  | 26   | 27   | 29   | 29   | 25   | 29   |
|  | 1    | 2    | 9    | 8    | 7    | 4    |
|  | 19   | 21   | 20   | 17   | 20   | 15   |
|  | 5    | 2    | 3    | 3    | 1    | 1    |
|  |      |      |      |      |      |      |
|  | 2014 | 2015 | 2016 | 2017 | 2018 | 2019 |
|  | 17   | 21   | 19   | 25   | 19   | 20   |
|  | 11   | 11   | 11   | 11   | 10   | 7    |
|  | 0    | 0    | 1    | 2    | 2    | 2    |
|  | 5    | 4    | 4    | 9    | 5    | 4    |
|  | 353  | 339  | 341  | 452  | 366  | 347  |
|  | 32   | 29   | 30   | 38   | 36   | 35   |
|  | 3    | 5    | 5    | 6    | 4    | 6    |
|  | 11   | 12   | 10   | 13   | 7    | 8    |
|  | 19   | 17   | 18   | 27   | 22   | 26   |
|  | 7    | 7    | 7    | 8    | 7    | 7    |
|  | 14   | 15   | 15   | 29   | 17   | 16   |
|  | 79   | 68   | 70   | 89   | 67   | 59   |
|  | 87   | 90   | 84   | 88   | 73   | 74   |
|  | 3    | 3    | 4    | 5    | 5    | 4    |
|  | 0    | 0    | 0    | 0    | 0    | 0    |
|  | 79   | 71   | 71   | 107  | 69   | 68   |
|  | 26   | 28   | 27   | 33   | 32   | 30   |

|    |    |    |    |    |    |
|----|----|----|----|----|----|
| 48 | 48 | 49 | 57 | 53 | 58 |
| 8  | 5  | 6  | 4  | 2  | 4  |

) awarded from 2011-2020 by specialty

| 2014 | 2015 | 2016 | 2017 | 2018 | 2019 |
|------|------|------|------|------|------|
| 5    | 5    | 5    | 6    | 8    | 5    |
| 4    | 6    | 7    | 11   | 13   | 10   |
| 1    | 2    | 0    | 0    | 1    | 1    |
| 7    | 7    | 8    | 8    | 9    | 9    |
| 144  | 159  | 143  | 135  | 154  | 170  |
| 17   | 17   | 19   | 20   | 19   | 23   |
| 0    | 0    | 1    | 0    | 2    | 3    |
| 4    | 5    | 5    | 7    | 6    | 8    |
| 1    | 0    | 0    | 1    | 2    | 2    |
| 7    | 10   | 7    | 6    | 5    | 6    |
| 2    | 0    | 0    | 0    | 0    | 0    |
| 14   | 13   | 12   | 13   | 16   | 17   |
| 19   | 16   | 25   | 23   | 21   | 23   |
| 6    | 7    | 8    | 13   | 13   | 10   |
| 0    | 0    | 0    | 0    | 0    | 0    |
| 75   | 72   | 67   | 70   | 65   | 72   |
| 11   | 14   | 14   | 19   | 18   | 15   |
| 7    | 10   | 12   | 13   | 9    | 8    |
| 1    | 3    | 4    | 6    | 5    | 5    |
| 2014 | 2015 | 2016 | 2017 | 2018 | 2019 |
| 15   | 13   | 12   | 16   | 21   | 25   |
| 16   | 15   | 12   | 14   | 11   | 14   |
| 4    | 5    | 7    | 7    | 8    | 7    |
| 2    | 1    | 1    | 1    | 1    | 3    |
| 0    | 228  | 241  | 230  | 251  | 281  |
| 33   | 37   | 33   | 31   | 30   | 35   |
| 7    | 11   | 12   | 14   | 11   | 13   |
| 5    | 2    | 3    | 2    | 5    | 6    |
| 29   | 30   | 28   | 27   | 27   | 25   |
| 4    | 4    | 5    | 7    | 7    | 7    |
| 10   | 12   | 11   | 9    | 10   | 12   |
| 33   | 32   | 24   | 25   | 28   | 27   |
| 86   | 82   | 91   | 106  | 117  | 113  |

|    |                                       |                     |             |             |             |             |
|----|---------------------------------------|---------------------|-------------|-------------|-------------|-------------|
| 1  |                                       |                     |             |             |             |             |
| 2  | 0                                     | 0                   | 0           | 0           | 1           | 1           |
| 3  | 0                                     | 0                   | 0           | 0           | 0           | 0           |
| 4  |                                       |                     |             |             |             |             |
| 5  | 28                                    | 22                  | 23          | 25          | 23          | 19          |
| 6  | 6                                     | 6                   | 1           | 3           | 3           | 14          |
| 7  |                                       |                     |             |             |             |             |
| 8  | 46                                    | 38                  | 38          | 39          | 44          | 45          |
| 9  | 7                                     | 4                   | 5           | 5           | 5           | 5           |
| 10 |                                       |                     |             |             |             |             |
| 11 |                                       |                     |             |             |             |             |
| 12 | <b>2014</b>                           | <b>2015</b>         | <b>2016</b> | <b>2017</b> | <b>2018</b> | <b>2019</b> |
| 13 | 13                                    | 12                  | 10          | 13          | 12          | 17          |
| 14 | 1                                     | 3                   | 4           | 4           | 9           | 10          |
| 15 |                                       |                     |             |             |             |             |
| 16 | 14                                    | 15                  | 19          | 21          | 19          | 20          |
| 17 | 3                                     | 6                   | 4           | 5           | 5           | 6           |
| 18 |                                       |                     |             |             |             |             |
| 19 | 297                                   | 276                 | 262         | 247         | 247         | 249         |
| 20 | 50                                    | 52                  | 43          | 48          | 53          | 58          |
| 21 | 4                                     | 5                   | 5           | 4           | 4           | 5           |
| 22 |                                       |                     |             |             |             |             |
| 23 | 14                                    | 10                  | 5           | 7           | 8           | 10          |
| 24 |                                       |                     |             |             |             |             |
| 25 | 11                                    | 13                  | 20          | 21          | 21          | 21          |
| 26 | 3                                     | 2                   | 2           | 1           | 3           | 3           |
| 27 | 9                                     | 12                  | 11          | 12          | 12          | 12          |
| 28 | 3                                     | 2                   | 1           | 1           | 1           | 1           |
| 29 |                                       |                     |             |             |             |             |
| 30 | 89                                    | 79                  | 65          | 85          | 93          | 108         |
| 31 | 12                                    | 9                   | 10          | 6           | 2           | 3           |
| 32 | 0                                     | 0                   | 0           | 0           | 0           | 0           |
| 33 | 99                                    | 100                 | 93          | 102         | 103         | 110         |
| 34 | 4                                     | 4                   | 4           | 4           | 2           | 1           |
| 35 |                                       |                     |             |             |             |             |
| 36 | 11                                    | 10                  | 10          | 9           | 8           | 9           |
| 37 | 3                                     | 2                   | 3           | 2           | 1           | 3           |
| 38 |                                       |                     |             |             |             |             |
| 39 | 157                                   | 164                 | 157         | 152         | 178         | 196         |
| 40 | 773                                   | 762                 | 749         | 710         | 774         | 822         |
| 41 |                                       |                     |             |             |             |             |
| 42 | 764                                   | 715                 | 715         | 679         | 720         | 734         |
| 43 | 37                                    | 34                  | 42          | 50          | 60          | 61          |
| 44 | 1                                     | 0                   | 0           | 1           | 0           | 1           |
| 45 |                                       |                     |             |             |             |             |
| 46 | 896                                   | 822                 | 846         | 864         | 899         | 903         |
| 47 | 495                                   | 503                 | 499         | 526         | 607         | 604         |
| 48 |                                       |                     |             |             |             |             |
| 49 | 359                                   | 360                 | 350         | 384         | 412         | 449         |
| 50 | 76                                    | 63                  | 60          | 61          | 60          | 61          |
| 51 |                                       |                     |             |             |             |             |
| 52 |                                       |                     |             |             |             |             |
| 53 |                                       |                     |             |             |             |             |
| 54 |                                       |                     |             |             |             |             |
| 55 |                                       |                     |             |             |             |             |
| 56 |                                       |                     |             |             |             |             |
| 57 |                                       |                     |             |             |             |             |
| 58 | <b>0, U01) awarded from 2011-2020</b> | <b>by specialty</b> |             |             |             |             |
| 59 |                                       |                     |             |             |             |             |
| 60 |                                       |                     |             |             |             |             |

|    |             |             |             |             |             |             |
|----|-------------|-------------|-------------|-------------|-------------|-------------|
| 1  |             |             |             |             |             |             |
| 2  |             |             |             |             |             |             |
| 3  |             |             |             |             |             |             |
| 4  |             |             |             |             |             |             |
| 5  |             |             |             |             |             |             |
| 6  |             |             |             |             |             |             |
| 7  |             |             |             |             |             |             |
| 8  |             |             |             |             |             |             |
| 9  |             |             |             |             |             |             |
| 10 |             |             |             |             |             |             |
| 11 |             |             |             |             |             |             |
| 12 |             |             |             |             |             |             |
| 13 |             |             |             |             |             |             |
| 14 |             |             |             |             |             |             |
| 15 |             |             |             |             |             |             |
| 16 |             |             |             |             |             |             |
| 17 |             |             |             |             |             |             |
| 18 |             |             |             |             |             |             |
| 19 |             |             |             |             |             |             |
| 20 |             |             |             |             |             |             |
| 21 |             |             |             |             |             |             |
| 22 |             |             |             |             |             |             |
| 23 |             |             |             |             |             |             |
| 24 |             |             |             |             |             |             |
| 25 |             |             |             |             |             |             |
| 26 |             |             |             |             |             |             |
| 27 |             |             |             |             |             |             |
| 28 |             |             |             |             |             |             |
| 29 |             |             |             |             |             |             |
| 30 |             |             |             |             |             |             |
| 31 |             |             |             |             |             |             |
| 32 |             |             |             |             |             |             |
| 33 | <b>2014</b> | <b>2015</b> | <b>2016</b> | <b>2017</b> | <b>2018</b> | <b>2019</b> |
| 34 | 6           | 4           | 4           | 6           | 9           | 8           |
| 35 | 4           | 8           | 9           | 7           | 4           | 4           |
| 36 | 1           | 4           | 4           | 5           | 4           | 2           |
| 37 | 7           | 6           | 5           | 2           | 2           | 5           |
| 38 | 124         | 110         | 90          | 91          | 102         | 120         |
| 39 | 12          | 13          | 16          | 15          | 15          | 15          |
| 40 | 5           | 7           | 4           | 2           | 2           | 2           |
| 41 | 12          | 10          | 11          | 15          | 17          | 14          |
| 42 | 2           | 3           | 1           | 1           | 2           | 3           |
| 43 | 14          | 10          | 7           | 3           | 3           | 7           |
| 44 | 15          | 14          | 12          | 12          | 10          | 2           |
| 45 | 20          | 15          | 9           | 12          | 21          | 26          |
| 46 | 34          | 34          | 43          | 35          | 41          | 38          |
| 47 | 7           | 5           | 5           | 3           | 4           | 7           |
| 48 | 0           | 0           | 1           | 1           | 0           | 0           |
| 49 | 22          | 20          | 23          | 29          | 23          | 20          |
| 50 | 17          | 21          | 9           | 11          | 18          | 22          |
| 51 | 17          | 19          | 14          | 25          | 21          | 11          |
| 52 | 4           | 5           | 3           | 1           | 1           | 3           |
| 53 |             |             |             |             |             |             |
| 54 |             |             |             |             |             |             |
| 55 |             |             |             |             |             |             |
| 56 |             |             |             |             |             |             |
| 57 |             |             |             |             |             |             |
| 58 |             |             |             |             |             |             |
| 59 |             |             |             |             |             |             |
| 60 |             |             |             |             |             |             |

|    |             |             |             |             |             |             |
|----|-------------|-------------|-------------|-------------|-------------|-------------|
| 1  |             |             |             |             |             |             |
| 2  |             |             |             |             |             |             |
| 3  |             |             |             |             |             |             |
| 4  | <b>2014</b> | <b>2015</b> | <b>2016</b> | <b>2017</b> | <b>2018</b> | <b>2019</b> |
| 5  | 21          | 28          | 27          | 26          | 37          | 39          |
| 6  | 26          | 21          | 14          | 15          | 16          | 15          |
| 7  | 5           | 6           | 5           | 7           | 10          | 6           |
| 8  | 20          | 24          | 23          | 14          | 12          | 16          |
| 9  | 368         | 379         | 394         | 375         | 376         | 377         |
| 10 | 73          | 72          | 79          | 82          | 93          | 107         |
| 11 | 21          | 35          | 36          | 27          | 26          | 41          |
| 12 | 25          | 24          | 24          | 21          | 28          | 33          |
| 13 | 29          | 36          | 34          | 24          | 31          | 51          |
| 14 | 15          | 16          | 16          | 26          | 36          | 26          |
| 15 | 28          | 23          | 14          | 15          | 31          | 30          |
| 16 | 140         | 160         | 166         | 138         | 117         | 113         |
| 17 | 108         | 121         | 123         | 116         | 118         | 127         |
| 18 | 9           | 4           | 9           | 13          | 10          | 13          |
| 19 | 0           | 0           | 0           | 0           | 0           | 0           |
| 20 | 179         | 156         | 151         | 153         | 149         | 155         |
| 21 | 115         | 121         | 118         | 115         | 89          | 103         |
| 22 | 48          | 62          | 68          | 50          | 49          | 51          |
| 23 | 4           | 10          | 13          | 9           | 7           | 8           |
| 24 |             |             |             |             |             |             |
| 25 |             |             |             |             |             |             |
| 26 |             |             |             |             |             |             |
| 27 |             |             |             |             |             |             |
| 28 |             |             |             |             |             |             |
| 29 |             |             |             |             |             |             |
| 30 |             |             |             |             |             |             |
| 31 |             |             |             |             |             |             |
| 32 |             |             |             |             |             |             |
| 33 |             |             |             |             |             |             |
| 34 | <b>2014</b> | <b>2015</b> | <b>2016</b> | <b>2017</b> | <b>2018</b> | <b>2019</b> |
| 35 | 1           | 0           | 0           | 0           | 0           | 0           |
| 36 | 11          | 8           | 12          | 11          | 5           | 4           |
| 37 | 0           | 0           | 0           | 0           | 0           | 0           |
| 38 | 4           | 4           | 4           | 1           | 1           | 4           |
| 39 | 248         | 312         | 353         | 283         | 558         | 333         |
| 40 | 14          | 14          | 16          | 16          | 18          | 21          |
| 41 | 2           | 2           | 1           | 1           | 1           | 2           |
| 42 | 3           | 5           | 6           | 0           | 3           | 6           |
| 43 | 29          | 32          | 29          | 29          | 31          | 29          |
| 44 | 5           | 5           | 5           | 5           | 5           | 6           |
| 45 | 8           | 6           | 5           | 1           | 61          | 1           |
| 46 | 23          | 26          | 27          | 27          | 20          | 13          |
| 47 | 18          | 18          | 20          | 18          | 12          | 14          |
| 48 | 0           | 0           | 0           | 0           | 0           | 0           |
| 49 | 0           | 0           | 0           | 0           | 0           | 0           |
| 50 | 15          | 20          | 13          | 11          | 9           | 11          |
| 51 | 7           | 8           | 7           | 10          | 10          | 12          |
| 52 | 12          | 24          | 27          | 20          | 127         | 22          |





|    |             |             |             |             |             |             |
|----|-------------|-------------|-------------|-------------|-------------|-------------|
| 1  |             |             |             |             |             |             |
| 2  | 2371        | 3197        | 3411        | 3896        | 4579        | 3190        |
| 3  | 9035        | 9164        | 9254        | 3114        | 2389        | 3256        |
| 4  |             |             |             |             |             |             |
| 5  | -           | -           | -           | -           | -           | 7317        |
| 6  | 1443        | 1398        | 1309        | 1317        | 1540        | 1338        |
| 7  |             |             |             |             |             |             |
| 8  | 38191       | 19316       | 4360        | 4981        | 5796        | 10324       |
| 9  | 1327        | 1203        | 1257        | 1473        | 1265        | 1704        |
| 10 |             |             |             |             |             |             |
| 11 | 1958        | 4904        | 3288        | 3307        | 10061       | 10201       |
| 12 |             |             |             |             |             |             |
| 13 |             |             |             |             |             |             |
| 14 | <b>2014</b> | <b>2015</b> | <b>2016</b> | <b>2017</b> | <b>2018</b> | <b>2019</b> |
| 15 | 2415        | 1969        | 2187        | 1670        | 2211        | 2113        |
| 16 | 1049        | 1064        | 1080        | 1096        | 1228        | 1788        |
| 17 |             |             |             |             |             |             |
| 18 | -           | -           | 40964       | 21174       | 21888       | 22601       |
| 19 |             |             |             |             |             |             |
| 20 | 22021       | 27824       | 28101       | 12613       | 23171       | 29550       |
| 21 | 319         | 337         | 337         | 256         | 322         | 346         |
| 22 | 415         | 462         | 452         | 361         | 387         | 404         |
| 23 |             |             |             |             |             |             |
| 24 | 1753        | 1069        | 1088        | 922         | 1410        | 958         |
| 25 |             |             |             |             |             |             |
| 26 | 3741        | 3457        | 4157        | 3204        | 6027        | 5340        |
| 27 | 971         | 1094        | 1039        | 697         | 867         | 743         |
| 28 | 2751        | 2735        | 2725        | 2375        | 2719        | 2724        |
| 29 |             |             |             |             |             |             |
| 30 | 669         | 627         | 631         | 328         | 568         | 611         |
| 31 | 171         | 195         | 187         | 144         | 190         | 214         |
| 32 |             |             |             |             |             |             |
| 33 | 654         | 639         | 690         | 664         | 815         | 819         |
| 34 | 3012        | 3055        | 2313        | 1869        | 1911        | 2442        |
| 35 |             |             |             |             |             |             |
| 36 | -           | -           | -           | -           | -           | -           |
| 37 | 475         | 531         | 535         | 357         | 558         | 570         |
| 38 |             |             |             |             |             |             |
| 39 | 1469        | 1380        | 1453        | 1207        | 1268        | 1377        |
| 40 | 525         | 526         | 513         | 439         | 477         | 441         |
| 41 |             |             |             |             |             |             |
| 42 | 1224        | 1962        | 1644        | 2480        | 5031        | 2550        |

**opment grant (K01, K08, K23) from 2011-2020 by specialty**

|    |             |             |             |             |             |             |
|----|-------------|-------------|-------------|-------------|-------------|-------------|
| 46 |             |             |             |             |             |             |
| 47 | <b>2014</b> | <b>2015</b> | <b>2016</b> | <b>2017</b> | <b>2018</b> | <b>2019</b> |
| 48 | 8211        | 8270        | 8311        | 6960        | 5252        | 8453        |
| 49 | 2884        | 1951        | 1697        | 1096        | 945         | 1252        |
| 50 |             |             |             |             |             |             |
| 51 | 38410       | 19790       | -           | -           | 43775       | 45202       |
| 52 | 15729       | 15899       | 14051       | 14189       | 12873       | 13133       |
| 53 | 782         | 718         | 803         | 856         | 765         | 707         |
| 54 | 781         | 788         | 713         | 686         | 733         | 615         |
| 55 |             |             |             |             |             |             |
| 56 | -           | -           | 5439        | -           | 2820        | 1916        |
| 57 |             |             |             |             |             |             |
| 58 | 10288       | 8296        | 8314        | 5951        | 7031        | 5340        |
| 59 |             |             |             |             |             |             |
| 60 | 18455       | -           | -           | 18817       | 9532        | 9656        |

|    |             |             |             |             |             |             |
|----|-------------|-------------|-------------|-------------|-------------|-------------|
| 1  |             |             |             |             |             |             |
| 2  | 2751        | 1915        | 2725        | 3167        | 3807        | 3178        |
| 3  | 4683        | -           | -           | -           | -           | -           |
| 4  |             |             |             |             |             |             |
| 5  | 964         | 1022        | 1089        | 988         | 796         | 744         |
| 6  | 2995        | 3596        | 2320        | 2541        | 2835        | 2636        |
| 7  |             |             |             |             |             |             |
| 8  | 1506        | 1309        | 1157        | 719         | 735         | 977         |
| 9  | -           | -           | -           | -           | -           | -           |
| 10 |             |             |             |             |             |             |
| 11 | 500         | 524         | 567         | 546         | 592         | 539         |
| 12 | 3472        | 2759        | 2803        | 2097        | 2254        | 2753        |
| 13 |             |             |             |             |             |             |
| 14 | 3603        | 2525        | 2096        | 1926        | 2811        | 3196        |
| 15 | 9790        | 3269        | 2466        | 1654        | 2012        | 2040        |
| 16 |             |             |             |             |             |             |
| 17 |             |             |             |             |             |             |
| 18 | <b>2014</b> | <b>2015</b> | <b>2016</b> | <b>2017</b> | <b>2018</b> | <b>2019</b> |
| 19 | 2737        | 3446        | 2770        | 2784        | 1827        | 1691        |
| 20 |             |             |             |             |             |             |
| 21 | 769         | 732         | 914         | 927         | 945         | 1043        |
| 22 |             |             |             |             |             |             |
| 23 | 9603        | 7916        | 5852        | 4705        | 5472        | 7534        |
| 24 | 55053       | 111295      | 112405      | 113514      | 115856      | 39399       |
| 25 |             |             |             |             |             |             |
| 26 | 467         | 496         | 471         | 490         | 481         | 437         |
| 27 | 415         | 352         | 411         | 416         | 464         | 393         |
| 28 |             |             |             |             |             |             |
| 29 | 657         | 486         | 418         | 395         | 513         | 479         |
| 30 | 8231        | 20741       | 13856       | 20828       | 7031        | 6103        |
| 31 |             |             |             |             |             |             |
| 32 | 595         | 563         | 693         | 752         | 706         | 840         |
| 33 | 4815        | 4786        | 4768        | 2714        | 2379        | 2724        |
| 34 |             |             |             |             |             |             |
| 35 | 851         | 724         | 861         | 1058        | 877         | 1086        |
| 36 | 375         | 403         | 568         | 514         | 439         | 452         |
| 37 |             |             |             |             |             |             |
| 38 | 677         | 710         | 630         | 513         | 518         | 532         |
| 39 | -           | -           | -           | -           | 9555        | 9767        |
| 40 | -           | -           | -           | -           | -           | -           |
| 41 |             |             |             |             |             |             |
| 42 | 1501        | 1509        | 1726        | 1661        | 1674        | 1940        |
| 43 | 5456        | 12877       | 19620       | 13282       | 10143       | 2950        |
| 44 |             |             |             |             |             |             |
| 45 | 587         | 683         | 613         | 626         | 588         | 568         |
| 46 | 1632        | 2452        | 1973        | 1984        | 2515        | 1700        |
| 47 |             |             |             |             |             |             |
| 48 |             |             |             |             |             |             |
| 49 | <b>2014</b> | <b>2015</b> | <b>2016</b> | <b>2017</b> | <b>2018</b> | <b>2019</b> |
| 50 | 3158        | 3446        | 4156        | 3212        | 3501        | 2486        |
| 51 |             |             |             |             |             |             |
| 52 | 11535       | 3902        | 2970        | 3013        | 1365        | 1252        |
| 53 |             |             |             |             |             |             |
| 54 | 2744        | 2639        | 2156        | 2017        | 2304        | 2260        |
| 55 | 36702       | 18549       | 28101       | 22703       | 23171       | 19700       |
| 56 |             |             |             |             |             |             |
| 57 | 379         | 413         | 438         | 468         | 477         | 483         |
| 58 | 265         | 258         | 315         | 286         | 263         | 244         |
| 59 |             |             |             |             |             |             |
| 60 | 1315        | 1069        | 1088        | 1383        | 1410        | 1150        |
|    | 2940        | 4148        | 8314        | 5951        | 5274        | 4272        |



|    |             |             |             |             |             |             |
|----|-------------|-------------|-------------|-------------|-------------|-------------|
| 1  |             |             |             |             |             |             |
| 2  | 908         | 1037        | 1276        | 1270        | 1156        | 1001        |
| 3  | 1106        | 1030        | 847         | 914         | 929         | 944         |
| 4  |             |             |             |             |             |             |
| 5  | 1052        | 764         | 1360        | 2766        | 2820        | 2874        |
| 6  | 3429        | 4148        | 3779        | 2777        | 2482        | 3051        |
| 7  |             |             |             |             |             |             |
| 8  | 9228        | 6198        | 18705       | 18817       | 9532        | 6437        |
| 9  | 1376        | 1915        | 2725        | 6334        | 6345        | 2724        |
| 10 |             |             |             |             |             |             |
| 11 | 624         | 672         | 789         | 794         | 965         | 4889        |
| 12 | 675         | 886         | 1451        | 1070        | 607         | 486         |
| 13 |             |             |             |             |             |             |
| 14 | 1674        | 1692        | 1349        | 1670        | 1452        | 1595        |
| 15 | 1291        | 1833        | 1851        | 3114        | 2389        | 1395        |
| 16 |             |             |             |             |             |             |
| 17 | -           | -           | 7081        | 7142        | -           | -           |
| 18 | 1705        | 1887        | 1651        | 1317        | 1674        | 1940        |
| 19 |             |             |             |             |             |             |
| 20 | 2247        | 1840        | 4360        | 3622        | 2254        | 1877        |
| 21 | 1484        | 1329        | 1796        | 1002        | 1205        | 2324        |
| 22 |             |             |             |             |             |             |
| 23 | 2447        | 1962        | 3288        | 9921        | 10061       | 3400        |
| 24 |             |             |             |             |             |             |
| 25 |             |             |             |             |             |             |
| 26 | <b>2014</b> | <b>2015</b> | <b>2016</b> | <b>2017</b> | <b>2018</b> | <b>2019</b> |
| 27 | 1955        | 1477        | 1539        | 1606        | 1136        | 1084        |
| 28 | 444         | 557         | 848         | 803         | 768         | 834         |
| 29 |             |             |             |             |             |             |
| 30 | 7682        | 6597        | 8193        | 6050        | 4378        | 7534        |
| 31 |             |             |             |             |             |             |
| 32 | 5505        | 4637        | 4887        | 8108        | 9655        | 7387        |
| 33 | 306         | 301         | 291         | 308         | 313         | 319         |
| 34 | 182         | 186         | 172         | 167         | 150         | 132         |
| 35 |             |             |             |             |             |             |
| 36 | 250         | 153         | 151         | 205         | 217         | 140         |
| 37 |             |             |             |             |             |             |
| 38 | 1646        | 1728        | 1732        | 1984        | 1507        | 1295        |
| 39 | 636         | 516         | 550         | 784         | 615         | 379         |
| 40 | 1284        | 1197        | 1192        | 731         | 529         | 733         |
| 41 |             |             |             |             |             |             |
| 42 | 334         | 409         | 676         | 635         | 311         | 326         |
| 43 | 96          | 83          | 79          | 93          | 109         | 112         |
| 44 |             |             |             |             |             |             |
| 45 | 527         | 476         | 471         | 504         | 504         | 477         |
| 46 | 1004        | 2291        | 1028        | 719         | 956         | 751         |
| 47 |             |             |             |             |             |             |
| 48 | -           | -           | -           | -           | -           | -           |
| 49 | 210         | 242         | 251         | 250         | 258         | 250         |
| 50 |             |             |             |             |             |             |
| 51 | 332         | 319         | 333         | 346         | 456         | 401         |
| 52 | 525         | 407         | 370         | 501         | 516         | 501         |
| 53 |             |             |             |             |             |             |
| 54 | 2447        | 981         | 759         | 1102        | 1437        | 1275        |
| 55 |             |             |             |             |             |             |
| 56 |             |             |             |             |             |             |
| 57 | <b>2014</b> | <b>2015</b> | <b>2016</b> | <b>2017</b> | <b>2018</b> | <b>2019</b> |
| 58 | 41055       | -           | -           | -           | -           | -           |
| 59 | 1049        | 1463        | 990         | 1096        | 2457        | 3129        |
| 60 | -           | -           | -           | -           | -           | -           |

|    |             |             |             |             |             |             |
|----|-------------|-------------|-------------|-------------|-------------|-------------|
| 1  |             |             |             |             |             |             |
| 2  | 27527       | 27824       | 28101       | 11351       | 11585       | 29550       |
| 3  | 454         | 366         | 325         | 408         | 211         | 361         |
| 4  | 948         | 957         | 847         | 857         | 774         | 674         |
| 5  | 2629        | 2673        | 5439        | 5531        | 5640        | 2874        |
| 6  | 13718       | 8296        | 6928        | -           | 14063       | 7120        |
| 7  | 636         | 581         | 645         | 649         | 615         | 666         |
| 8  | 3852        | 3829        | 3815        | 3800        | 3807        | 3178        |
| 9  | 1171        | 1569        | 1894        | 9526        | 158         | 9777        |
| 10 | 587         | 511         | 484         | 476         | 637         | 973         |
| 11 | 3161        | 3197        | 2899        | 3246        | 4961        | 4330        |
| 12 | -           | -           | -           | -           | -           | -           |
| 13 | -           | -           | -           | -           | -           | -           |
| 14 | 2501        | 1887        | 2921        | 3473        | 4278        | 3527        |
| 15 | 5456        | 4829        | 5606        | 3985        | 4057        | 3441        |
| 16 | 2102        | 1052        | 931         | 1252        | 199         | 1162        |
| 17 | 1632        | 1635        | 1096        | -           | -           | -           |
| 18 |             |             |             |             |             |             |
| 19 |             |             |             |             |             |             |
| 20 | <b>2014</b> | <b>2015</b> | <b>2016</b> | <b>2017</b> | <b>2018</b> | <b>2019</b> |
| 21 | 3421        | 4595        | 2770        | 2983        | 2801        | 3522        |
| 22 | 1922        | 1463        | 2376        | 2410        | 2047        | 1391        |
| 23 | 2744        | 4947        | 8193        | 10587       | 5472        | 15067       |
| 24 | 10010       | 7420        | 7494        | 8732        | 7724        | 7880        |
| 25 | 295         | 274         | 277         | 263         | 240         | 213         |
| 26 | 246         | 239         | 174         | 221         | 199         | 208         |
| 27 | 751         | 411         | 201         | 221         | 269         | 575         |
| 28 | 3166        | 1804        | 3198        | 2604        | 3516        | 4747        |
| 29 | 3691        | 3719        | 3741        | 3136        | 1906        | 1609        |
| 30 | 9629        | 19145       | 19073       | -           | -           | 19069       |
| 31 | 2341        | 3137        | 3156        | 2382        | 1930        | 2444        |
| 32 | 409         | 458         | 408         | 401         | 364         | 333         |
| 33 | 474         | 464         | 563         | 536         | 541         | 546         |
| 34 | 1291        | 1146        | 1851        | 1869        | 1593        | 3256        |
| 35 | -           | -           | -           | -           | 7230        | 7317        |
| 36 | 441         | 363         | 457         | 509         | 437         | 422         |
| 37 | 1469        | 1136        | 1353        | 996         | 751         | 737         |
| 38 | 537         | 495         | 535         | 482         | 402         | 448         |
| 39 | 489         | 577         | 617         | 522         | 774         | 680         |
| 40 |             |             |             |             |             |             |
| 41 |             |             |             |             |             |             |
| 42 |             |             |             |             |             |             |
| 43 |             |             |             |             |             |             |
| 44 |             |             |             |             |             |             |
| 45 |             |             |             |             |             |             |
| 46 |             |             |             |             |             |             |
| 47 |             |             |             |             |             |             |
| 48 |             |             |             |             |             |             |
| 49 |             |             |             |             |             |             |
| 50 |             |             |             |             |             |             |
| 51 |             |             |             |             |             |             |
| 52 |             |             |             |             |             |             |
| 53 |             |             |             |             |             |             |
| 54 |             |             |             |             |             |             |
| 55 |             |             |             |             |             |             |
| 56 |             |             |             |             |             |             |
| 57 |             |             |             |             |             |             |
| 58 |             |             |             |             |             |             |
| 59 |             |             |             |             |             |             |
| 60 |             |             |             |             |             |             |

## rs from 2011-2020 by specialty

|  | 2014   | 2015   | 2016   | 2017   | 2018   | 2019   |
|--|--------|--------|--------|--------|--------|--------|
|  | 305    | 24     | 58     | 171    | 288    | 122    |
|  | 86     | 149    | 167    | 231    | 233    | 66     |
|  | 0      | 0      | 0      | 0      | 0      | 0      |
|  | 56     | 20     | 0      | 0      | 0      | 0      |
|  | 5543   | 5833   | 6417   | 6236   | 6436   | 6670   |
|  | 1539   | 1457   | 1296   | 1234   | 1520   | 1584   |
|  | 413    | 503    | 538    | 529    | 802    | 443    |
|  | 215    | 276    | 229    | 146    | 356    | 310    |
|  | 491    | 644    | 398    | 430    | 420    | 532    |
|  | 231    | 321    | 288    | 331    | 429    | 446    |
|  | 508    | 297    | 463    | 595    | 542    | 500    |
|  | 1023   | 1207   | 1368   | 892    | 1052   | 980    |
|  | 1229   | 867    | 773    | 737    | 762    | 1158   |
|  | 56     | 41     | 69     | 188    | 246    | 197    |
|  | 0      | 0      | 0      | 0      | 0      | 71     |
|  | 1254   | 1424   | 1560   | 1178   | 1385   | 1700   |
|  | 55     | 112    | 478    | 383    | 429    | 269    |
|  | 983    | 1149   | 1027   | 942    | 1285   | 1008   |
|  | 223    | 121    | 156    | 118    | 74     | 66     |
|  |        |        |        |        |        |        |
|  | 2014   | 2015   | 2016   | 2017   | 2018   | 2019   |
|  | 3258   | 4813   | 4967   | 5373   | 5038   | 5083   |
|  | 1840   | 2359   | 2357   | 2268   | 2180   | 1957   |
|  | 0      | 0      | 169    | 740    | 894    | 916    |
|  | 1487   | 1507   | 1328   | 2196   | 1739   | 1472   |
|  | 111459 | 115327 | 119832 | 120062 | 132678 | 134551 |
|  | 10030  | 9009   | 9960   | 10802  | 11276  | 9092   |
|  | 600    | 1739   | 1820   | 1644   | 2273   | 3672   |
|  | 2622   | 2685   | 2442   | 2154   | 1666   | 1762   |
|  | 4390   | 4005   | 3857   | 3762   | 4064   | 4869   |
|  | 1617   | 1686   | 1676   | 1832   | 1568   | 1675   |
|  | 3672   | 3961   | 3768   | 4342   | 4372   | 4284   |
|  | 26906  | 24478  | 24051  | 25070  | 24675  | 22805  |
|  | 21653  | 24482  | 24548  | 21927  | 24246  | 25047  |
|  | 844    | 939    | 1004   | 1063   | 1287   | 1263   |
|  | 0      | 0      | 0      | 0      | 0      | 0      |
|  | 19112  | 18134  | 20311  | 21132  | 21545  | 22702  |
|  | 4886   | 5477   | 7208   | 6005   | 7795   | 7771   |

|       |       |       |       |       |       |
|-------|-------|-------|-------|-------|-------|
| 10806 | 10501 | 12327 | 13198 | 16012 | 17863 |
| 1166  | 648   | 906   | 623   | 335   | 989   |

thousands of dollars from 2011-2020 by specialty

| 2014  | 2015  | 2016  | 2017  | 2018  | 2019  |
|-------|-------|-------|-------|-------|-------|
| 613   | 884   | 888   | 1031  | 1209  | 655   |
| 445   | 647   | 779   | 1280  | 1341  | 1030  |
| 132   | 276   | 0     | 0     | 41    | 123   |
| 896   | 930   | 1072  | 1086  | 1278  | 1167  |
| 18721 | 20557 | 18980 | 19473 | 22017 | 24366 |
| 2554  | 2501  | 2809  | 2734  | 2635  | 2983  |
| 0     | 0     | 105   | 0     | 318   | 454   |
| 640   | 779   | 742   | 953   | 771   | 1024  |
| 131   | 0     | 0     | 145   | 253   | 260   |
| 850   | 1105  | 885   | 750   | 615   | 700   |
| 260   | 0     | 0     | 0     | 0     | 0     |
| 1500  | 1507  | 2011  | 2106  | 2359  | 2072  |
| 2465  | 2174  | 3086  | 3156  | 3056  | 3452  |
| 733   | 864   | 992   | 1686  | 1664  | 1336  |
| 0     | 0     | 0     | 0     | 0     | 0     |
| 11433 | 10732 | 10180 | 10475 | 10189 | 11101 |
| 1575  | 1710  | 1929  | 2705  | 2437  | 1931  |
| 886   | 1353  | 1716  | 2081  | 1590  | 1374  |
| 137   | 440   | 594   | 846   | 700   | 699   |
|       |       |       |       |       |       |
| 2014  | 2015  | 2016  | 2017  | 2018  | 2019  |
| 2275  | 2120  | 2058  | 2662  | 3792  | 4516  |
| 1733  | 1802  | 1934  | 1958  | 1802  | 2016  |
| 593   | 746   | 1091  | 1136  | 1284  | 1113  |
| 275   | 148   | 146   | 168   | 168   | 515   |
| 34241 | 32022 | 37178 | 37443 | 41602 | 46610 |
| 5789  | 5803  | 5416  | 5683  | 5691  | 6525  |
| 1153  | 1658  | 1867  | 2222  | 2009  | 2370  |
| 598   | 244   | 374   | 334   | 907   | 1110  |
| 6174  | 6111  | 5435  | 5502  | 5280  | 5054  |
| 438   | 485   | 871   | 1201  | 1031  | 847   |
| 1833  | 2265  | 2069  | 1684  | 1933  | 2167  |
| 4859  | 4564  | 3929  | 3803  | 4681  | 4720  |
| 12372 | 11670 | 13420 | 17141 | 19548 | 19397 |



|             |             |             |             |             |             |
|-------------|-------------|-------------|-------------|-------------|-------------|
| 0           | 0           | 0           | 0           | 171         | 171         |
| 0           | 0           | 0           | 0           | 0           | 0           |
| 4502        | 3704        | 3895        | 4264        | 3698        | 3256        |
| 915         | 832         | 172         | 532         | 610         | 2888        |
| 6572        | 5420        | 6127        | 6343        | 7333        | 7654        |
| 1060        | 662         | 824         | 843         | 830         | 1111        |
|             |             |             |             |             |             |
| <b>2014</b> | <b>2015</b> | <b>2016</b> | <b>2017</b> | <b>2018</b> | <b>2019</b> |
| 2035        | 1853        | 1538        | 2247        | 2154        | 3073        |
| 123         | 257         | 669         | 694         | 1364        | 1557        |
| 2158        | 2213        | 3113        | 3733        | 3333        | 3579        |
| 440         | 648         | 585         | 808         | 801         | 985         |
| 44077       | 40587       | 43388       | 43248       | 44087       | 44953       |
| 8382        | 8632        | 7030        | 8764        | 9346        | 10301       |
| 695         | 840         | 727         | 734         | 735         | 927         |
| 1695        | 1160        | 648         | 1143        | 1352        | 1734        |
| 2238        | 2693        | 4070        | 4562        | 4059        | 4513        |
| 318         | 195         | 347         | 173         | 369         | 494         |
| 1902        | 2599        | 2144        | 2433        | 2431        | 2297        |
| 405         | 277         | 137         | 146         | 142         | 190         |
| 12112       | 10974       | 10253       | 14883       | 16378       | 18825       |
| 1638        | 1305        | 1231        | 992         | 270         | 454         |
| 0           | 0           | 0           | 0           | 0           | 0           |
| 16115       | 15647       | 15318       | 18084       | 17910       | 19349       |
| 650         | 647         | 694         | 723         | 359         | 196         |
| 1572        | 1469        | 1940        | 1610        | 1465        | 1556        |
| 465         | 301         | 436         | 312         | 144         | 505         |

ling in thousands of dollars from 2011-2020 by specialty

| <b>2014</b> | <b>2015</b> | <b>2016</b> | <b>2017</b> | <b>2018</b> | <b>2019</b> |
|-------------|-------------|-------------|-------------|-------------|-------------|
| 88148       | 84338       | 85814       | 88443       | 105316      | 110591      |
| 39382       | 39803       | 42030       | 39871       | 48634       | 50513       |
| 15519       | 16628       | 18528       | 21356       | 24195       | 31063       |
| 33725       | 38982       | 38711       | 38849       | 45070       | 45999       |
| 1184510     | 1191770     | 1289757     | 1394581     | 1518667     | 1645808     |
| 217259      | 219583      | 245691      | 282468      | 336910      | 347790      |
| 47635       | 61235       | 65217       | 69463       | 77096       | 85492       |
| 48015       | 52140       | 63774       | 75443       | 79065       | 97330       |
| 156156      | 147880      | 147840      | 157163      | 169590      | 186335      |
| 44466       | 42092       | 47136       | 51958       | 55502       | 60828       |

|    |             |             |             |             |             |             |
|----|-------------|-------------|-------------|-------------|-------------|-------------|
| 1  |             |             |             |             |             |             |
| 2  | 58138       | 63423       | 63655       | 67549       | 78620       | 91749       |
| 3  | 279372      | 287786      | 295775      | 297770      | 33357       | 360175      |
| 4  | 323344      | 314062      | 312097      | 29934       | 325846      | 344660      |
| 5  | 15088       | 13669       | 17536       | 23490       | 27050       | 28451       |
| 6  | 302         | 0           | 0           | 333         | 0           | 284         |
| 7  | 420040      | 400779      | 431651      | 454570      | 494086      | 510676      |
| 8  | 201325      | 211587      | 231175      | 256833      | 293765      | 305237      |
| 9  | 134551      | 142824      | 145184      | 162932      | 176766      | 202367      |
| 10 | 23243       | 21703       | 20603       | 23240       | 24148       | 25147       |
| 11 |             |             |             |             |             |             |
| 12 |             |             |             |             |             |             |
| 13 |             |             |             |             |             |             |
| 14 |             |             |             |             |             |             |
| 15 |             |             |             |             |             |             |
| 16 |             |             |             |             |             |             |
| 17 | <b>2014</b> | <b>2015</b> | <b>2016</b> | <b>2017</b> | <b>2018</b> | <b>2019</b> |
| 18 | 532855      | 322574      | 308213      | 386668      | 763750      | 792285      |
| 19 | 318146      | 629917      | 704687      | 535792      | 310250      | 389937      |
| 20 | 114000      | 41539       | 415491      | 451612      | 350895      | 194750      |
| 21 | 507967      | 429418      | 40752       | 155583      | 179250      | 552565      |
| 22 | 10753491    | 9694220     | 7907586     | 7842786     | 8562404     | 11413933    |
| 23 | 1051369     | 1257543     | 1688365     | 1381103     | 1185473     | 1536028     |
| 24 | 386897      | 593779      | 357615      | 16180       | 161079      | 160250      |
| 25 | 803596      | 746483      | 1003704     | 1331211     | 139082      | 1124544     |
| 26 | 195625      | 271238      | 81000       | 117750      | 19400       | 322473      |
| 27 | 1189895     | 818017      | 500294      | 231895      | 359624      | 739085      |
| 28 | 1968522     | 1885934     | 1684593     | 1797130     | 1311104     | 320436      |
| 29 | 1451656     | 1241119     | 736439      | 1033500     | 1799423     | 2429442     |
| 30 | 2605049     | 302260      | 4009767     | 3103581     | 3812411     | 321513      |
| 31 | 600245      | 412624      | 395279      | 172249      | 491150      | 839096      |
| 32 | 0           | 0           | 77000       | 77625       | 0           | 0           |
| 33 | 2383628     | 2119936     | 2248675     | 2639599     | 211641      | 1885175     |
| 34 | 1377746     | 1544365     | 72650       | 928242      | 1578939     | 2227240     |
| 35 | 1564172     | 1504562     | 1191847     | 2115365     | 1802267     | 102415      |
| 36 | 355604      | 471148      | 299855      | 81000       | 84750       | 285251      |
| 37 |             |             |             |             |             |             |
| 38 |             |             |             |             |             |             |
| 39 |             |             |             |             |             |             |
| 40 |             |             |             |             |             |             |
| 41 |             |             |             |             |             |             |
| 42 |             |             |             |             |             |             |
| 43 |             |             |             |             |             |             |
| 44 |             |             |             |             |             |             |
| 45 |             |             |             |             |             |             |
| 46 |             |             |             |             |             |             |
| 47 |             |             |             |             |             |             |
| 48 | <b>2014</b> | <b>2015</b> | <b>2016</b> | <b>2017</b> | <b>2018</b> | <b>2019</b> |
| 49 | 5048        | 6017        | 6011        | 5305        | 7608        | 9044        |
| 50 | 4881        | 3694        | 2887        | 3101        | 3214        | 3172        |
| 51 | 1135        | 1061        | 859         | 1056        | 1709        | 1601        |
| 52 | 3912        | 4672        | 4043        | 2436        | 2462        | 2749        |
| 53 | 74078       | 74281       | 79671       | 76564       | 76594       | 77444       |
| 54 | 14878       | 15211       | 16928       | 17462       | 19479       | 25806       |
| 55 | 4831        | 7289        | 7888        | 5719        | 5571        | 11745       |
| 56 | 4890        | 5247        | 4730        | 4449        | 5749        | 6279        |
| 57 | 5643        | 8032        | 6662        | 4941        | 6515        | 11474       |

|    |             |             |             |             |             |             |
|----|-------------|-------------|-------------|-------------|-------------|-------------|
| 1  |             |             |             |             |             |             |
| 2  | 2686        | 2878        | 2916        | 5150        | 7074        | 4837        |
| 3  | 5060        | 4484        | 2935        | 2973        | 5233        | 5598        |
| 4  |             |             |             |             |             |             |
| 5  | 28845       | 33013       | 33180       | 28281       | 24359       | 24053       |
| 6  | 22098       | 24760       | 24980       | 23663       | 24697       | 27382       |
| 7  |             |             |             |             |             |             |
| 8  | 1664        | 700         | 1979        | 2772        | 2106        | 2839        |
| 9  | 0           | 0           | 0           | 0           | 0           | 0           |
| 10 |             |             |             |             |             |             |
| 11 | 36372       | 31818       | 31144       | 31685       | 31006       | 33529       |
| 12 | 23694       | 25496       | 24020       | 22735       | 18066       | 21872       |
| 13 |             |             |             |             |             |             |
| 14 | 10237       | 12823       | 13371       | 9947        | 9617        | 10320       |
| 15 | 740         | 1802        | 2463        | 1761        | 1385        | 1519        |
| 16 |             |             |             |             |             |             |
| 17 |             |             |             |             |             |             |
| 18 | <b>2014</b> | <b>2015</b> | <b>2016</b> | <b>2017</b> | <b>2018</b> | <b>2019</b> |
| 19 | 1000        | 0           | 0           | 0           | 0           | 0           |
| 20 |             |             |             |             |             |             |
| 21 | 6889        | 6479        | 7431        | 6547        | 3292        | 3102        |
| 22 | 0           | 0           | 0           | 0           | 0           | 0           |
| 23 |             |             |             |             |             |             |
| 24 | 475         | 475         | 475         | 1499        | 1632        | 2024        |
| 25 |             |             |             |             |             |             |
| 26 | 395655      | 359149      | 370938      | 382260      | 390765      | 453863      |
| 27 | 12964       | 13371       | 14593       | 14617       | 16643       | 21105       |
| 28 |             |             |             |             |             |             |
| 29 | 1789        | 1749        | 638         | 625         | 612         | 698         |
| 30 | 5379        | 5786        | 5762        | 0           | 2477        | 2907        |
| 31 |             |             |             |             |             |             |
| 32 | 17284       | 16661       | 15685       | 15703       | 17556       | 17588       |
| 33 | 3072        | 3059        | 3517        | 3485        | 3459        | 4536        |
| 34 | 4455        | 2996        | 2292        | 615         | 5495        | 5130        |
| 35 |             |             |             |             |             |             |
| 36 | 36242       | 33708       | 42777       | 35624       | 14090       | 12858       |
| 37 | 17069       | 16976       | 14906       | 14370       | 10935       | 11681       |
| 38 |             |             |             |             |             |             |
| 39 | 0           | 0           | 0           | 0           | 0           | 0           |
| 40 | 0           | 0           | 0           | 0           | 0           | 0           |
| 41 |             |             |             |             |             |             |
| 42 | 16179       | 18316       | 13464       | 11666       | 9558        | 8712        |
| 43 | 5930        | 11823       | 6816        | 8877        | 8628        | 11308       |
| 44 |             |             |             |             |             |             |
| 45 | 15973       | 25296       | 25363       | 37629       | 34242       | 29825       |
| 46 | 5304        | 5342        | 6332        | 0           | 0           | 0           |
| 47 |             |             |             |             |             |             |
| 48 |             |             |             |             |             |             |
| 49 | <b>2014</b> | <b>2015</b> | <b>2016</b> | <b>2017</b> | <b>2018</b> | <b>2019</b> |
| 50 | 6975        | 5936        | 12086       | 9053        | 8374        | 11426       |
| 51 |             |             |             |             |             |             |
| 52 | 2239        | 4082        | 2749        | 3182        | 3562        | 8176        |
| 53 |             |             |             |             |             |             |
| 54 | 7022        | 4410        | 3305        | 6454        | 25263       | 1974        |
| 55 | 9833        | 11830       | 9649        | 6264        | 8843        | 9972        |
| 56 |             |             |             |             |             |             |
| 57 | 416081      | 369849      | 355612      | 392159      | 420565      | 616327      |
| 58 | 79220       | 64682       | 87852       | 70398       | 111816      | 102885      |
| 59 | 15038       | 11441       | 25764       | 27265       | 13884       | 6841        |
| 60 | 11010       | 47414       | 9749        | 8790        | 12287       | 8037        |



|    |         |         |         |         |         |         |
|----|---------|---------|---------|---------|---------|---------|
| 1  |         |         |         |         |         |         |
| 2  | 13.50   | 13.54   | 11.82   | 19.34   | 15.01   | 12.46   |
| 3  | 990.15  | 1010.85 | 1043.62 | 1038.99 | 1125.69 | 1119.66 |
| 4  | 755.62  | 672.69  | 734.84  | 787.50  | 809.40  | 642.70  |
| 5  | 114.08  | 325.3   | 334.6   | 297.2   | 403.1   | 638.7   |
| 6  | 63.72   | 64.74   | 58.75   | 51.7    | 39.48   | 41.24   |
| 7  | 237.86  | 215.42  | 206.22  | 199.95  | 213.17  | 252.12  |
| 8  | 83.97   | 88.05   | 87.9    | 96.42   | 82.36   | 87.83   |
| 9  | 392.08  | 420.92  | 397.90  | 455.84  | 453.01  | 438.15  |
| 10 | 1993.36 | 1842.40 | 1841.23 | 1952.68 | 1936.68 | 1803.78 |
| 11 | 380.54  | 425.45  | 423.31  | 375.23  | 407.32  | 413.19  |
| 12 | 93.41   | 102.48  | 108.48  | 113.81  | 134.73  | 129.29  |
| 13 | 0       | 0       | 0       | 0       | 0       | 0       |
| 14 | 509.45  | 480.55  | 534.91  | 553.12  | 559.63  | 585.23  |
| 15 | 127.95  | 141.77  | 183.69  | 150.70  | 192.13  | 188.18  |
| 16 | 428.48  | 415.80  | 490.17  | 527.02  | 632.8   | 698.7   |
| 17 | 119.16  | 66.07   | 91.89   | 62.83   | 33.26   | 96.93   |
| 18 |         |         |         |         |         |         |
| 19 |         |         |         |         |         |         |
| 20 |         |         |         |         |         |         |
| 21 |         |         |         |         |         |         |
| 22 |         |         |         |         |         |         |
| 23 |         |         |         |         |         |         |
| 24 |         |         |         |         |         |         |
| 25 |         |         |         |         |         |         |
| 26 |         |         |         |         |         |         |

**01, K08, K23) spent per active physician from 2011-2020 by specialty**

|    | <b>2014</b> | <b>2015</b> | <b>2016</b> | <b>2017</b> | <b>2018</b> | <b>2019</b> |
|----|-------------|-------------|-------------|-------------|-------------|-------------|
| 27 | 14.94       | 21.38       | 21.37       | 24.69       | 28.77       | 15.50       |
| 28 | 38.57       | 55.29       | 65.58       | 106.25      | 109.18      | 82.28       |
| 29 | 3.44        | 6.97        | 0           | 0           | 0.93        | 2.73        |
| 30 | 8.14        | 8.35        | 9.53        | 9.57        | 11.03       | 9.88        |
| 31 | 166.31      | 180.19      | 165.29      | 168.51      | 186.80      | 202.76      |
| 32 | 192.43      | 186.72      | 207.22      | 199.33      | 189.16      | 210.88      |
| 33 | 0           | 0           | 19.26       | 0           | 56.31       | 78.98       |
| 34 | 15.55       | 18.77       | 17.85       | 22.88       | 18.27       | 23.96       |
| 35 | 7.10        | 0           | 0           | 7.72        | 13.28       | 13.46       |
| 36 | 44.16       | 57.72       | 46.4        | 39.47       | 32.31       | 36.72       |
| 37 | 27.75       | 0           | 0           | 0           | 0           | 0           |
| 38 | 111.14      | 113.43      | 153.99      | 164.00      | 185.13      | 163.88      |
| 39 | 43.32       | 37.79       | 53.22       | 54.02       | 51.33       | 56.95       |
| 40 | 81.08       | 94.27       | 107.23      | 180.41      | 174.18      | 136.74      |
| 41 | 0           | 0           | 0           | 0           | 0           | 0           |
| 42 | 304.76      | 284.39      | 268.10      | 274.19      | 264.67      | 286.16      |
| 43 | 41.23       | 44.27       | 49.16       | 67.88       | 60.06       | 46.75       |
| 44 | 35.12       | 53.59       | 68.22       | 83.1        | 62.83       | 53.73       |
| 45 | 14.04       | 44.88       | 60.18       | 85.28       | 69.62       | 68.52       |
| 46 |             |             |             |             |             |             |
| 47 |             |             |             |             |             |             |
| 48 |             |             |             |             |             |             |
| 49 |             |             |             |             |             |             |
| 50 |             |             |             |             |             |             |
| 51 |             |             |             |             |             |             |
| 52 |             |             |             |             |             |             |
| 53 |             |             |             |             |             |             |
| 54 |             |             |             |             |             |             |
| 55 |             |             |             |             |             |             |
| 56 |             |             |             |             |             |             |
| 57 |             |             |             |             |             |             |
| 58 |             |             |             |             |             |             |
| 59 |             |             |             |             |             |             |
| 60 |             |             |             |             |             |             |
|    | <b>2014</b> | <b>2015</b> | <b>2016</b> | <b>2017</b> | <b>2018</b> | <b>2019</b> |

|    |             |             |             |             |             |             |
|----|-------------|-------------|-------------|-------------|-------------|-------------|
| 1  |             |             |             |             |             |             |
| 2  | 55.42       | 51.27       | 49.53       | 63.75       | 90.26       | 106.84      |
| 3  | 150.23      | 153.90      | 162.85      | 162.50      | 146.67      | 161.06      |
| 4  |             |             |             |             |             |             |
| 5  | 15.43       | 18.84       | 26.64       | 26.82       | 29.34       | 24.63       |
| 6  |             |             |             |             |             |             |
| 7  | 2.50        | 1.33        | 1.30        | 1.48        | 1.45        | 4.35        |
| 8  | 304.18      | 280.67      | 323.79      | 324.02      | 352.97      | 387.86      |
| 9  | 436.15      | 433.34      | 399.55      | 414.33      | 408.50      | 461.26      |
| 10 |             |             |             |             |             |             |
| 11 | 219.26      | 310.07      | 343.34      | 401.77      | 356.15      | 412.35      |
| 12 | 14.54       | 5.88        | 8.99        | 8.01        | 21.51       | 25.98       |
| 13 |             |             |             |             |             |             |
| 14 | 334.57      | 328.66      | 290.54      | 292.39      | 276.97      | 261.70      |
| 15 | 22.73       | 25.33       | 45.65       | 63.2        | 54.19       | 44.41       |
| 16 |             |             |             |             |             |             |
| 17 | 195.77      | 240.71      | 218.56      | 176.78      | 200.32      | 221.60      |
| 18 | 359.99      | 343.54      | 300.77      | 296.19      | 367.42      | 373.30      |
| 19 |             |             |             |             |             |             |
| 20 | 217.43      | 202.81      | 231.42      | 293.33      | 328.39      | 319.98      |
| 21 | 0           | 0           | 0           | 0           | 17.91       | 17.51       |
| 22 |             |             |             |             |             |             |
| 23 | 0           | 0           | 0           | 0           | 0           | 0           |
| 24 | 119.99      | 98.17       | 102.58      | 111.62      | 96.05       | 83.94       |
| 25 |             |             |             |             |             |             |
| 26 | 23.96       | 21.53       | 4.38        | 13.36       | 15.04       | 69.92       |
| 27 | 260.59      | 214.63      | 243.63      | 253.30      | 289.80      | 299.40      |
| 28 |             |             |             |             |             |             |
| 29 | 108.32      | 67.48       | 83.58       | 85.01       | 82.5        | 108.92      |
| 30 |             |             |             |             |             |             |
| 31 |             |             |             |             |             |             |
| 32 | <b>2014</b> | <b>2015</b> | <b>2016</b> | <b>2017</b> | <b>2018</b> | <b>2019</b> |
| 33 | 49.58       | 44.81       | 37.01       | 53.81       | 51.26       | 72.70       |
| 34 | 10.66       | 21.97       | 56.29       | 57.57       | 111.06      | 124.41      |
| 35 | 56.18       | 55.92       | 75.99       | 88.16       | 76.13       | 79.18       |
| 36 | 3.99        | 5.82        | 5.20        | 7.11        | 6.91        | 8.33        |
| 37 | 391.56      | 355.75      | 377.87      | 374.26      | 374.05      | 374.07      |
| 38 | 631.47      | 644.54      | 518.67      | 638.91      | 670.83      | 728.21      |
| 39 |             |             |             |             |             |             |
| 40 | 132.14      | 157.06      | 133.72      | 132.76      | 130.34      | 161.29      |
| 41 | 41.18       | 27.96       | 15.59       | 27.45       | 32.06       | 40.59       |
| 42 | 121.28      | 144.82      | 217.56      | 242.46      | 212.90      | 233.70      |
| 43 | 16.51       | 10.16       | 18.17       | 9.12        | 19.40       | 25.89       |
| 44 | 203.04      | 276.16      | 226.42      | 255.43      | 251.86      | 234.92      |
| 45 | 30.02       | 20.86       | 10.49       | 11.37       | 11.18       | 15.03       |
| 46 | 212.86      | 190.71      | 176.80      | 254.69      | 275.13      | 310.56      |
| 47 | 181.33      | 142.39      | 133.04      | 106.19      | 28.27       | 46.51       |
| 48 |             |             |             |             |             |             |
| 49 | 0           | 0           | 0           | 0           | 0           | 0           |
| 50 | 429.56      | 414.64      | 403.43      | 473.34      | 465.21      | 498.79      |
| 51 | 17.03       | 16.74       | 17.70       | 18.13       | 8.86        | 4.74        |
| 52 | 62.32       | 58.19       | 77.12       | 64.29       | 57.90       | 60.88       |
| 53 |             |             |             |             |             |             |
| 54 | 47.54       | 30.71       | 44.21       | 31.45       | 14.34       | 49.54       |

**(21, P30, U01) spent per active physician from 2011-2020 by specialty**

| <b>2014</b> | <b>2015</b> | <b>2016</b> | <b>2017</b> | <b>2018</b> | <b>2019</b> |
|-------------|-------------|-------------|-------------|-------------|-------------|
| 2147.10     | 2039.57     | 2065.00     | 2117.78     | 2506.67     | 2616.49     |
| 3414.25     | 3400.26     | 3538.3      | 3308.52     | 3959.33     | 4035.89     |
| 404.05      | 420.12      | 452.30      | 504.30      | 552.70      | 687.19      |
| 306.29      | 350.25      | 344.39      | 342.24      | 389.01      | 389.17      |
| 10522.61    | 10445.97    | 11232.57    | 12068.33    | 12884.91    | 13695.55    |
| 16367.29    | 16396.56    | 18126.12    | 20592.56    | 24183.35    | 24585.73    |
| 9058.58     | 11454.43    | 11991.81    | 12558.93    | 13670.75    | 14873.42    |
| 1166.74     | 1256.97     | 1534.18     | 1811.10     | 1874.12     | 2278.34     |
| 8461.44     | 7953.54     | 7903.77     | 8352.17     | 8895.57     | 9648.68     |
| 2308.81     | 2198.59     | 2471.33     | 2734.49     | 2915.80     | 3189.91     |
| 6207.68     | 6739.23     | 6722.77     | 7091.05     | 8145.93     | 9384.18     |
| 20697.31    | 21660.82    | 22643.09    | 23192.63    | 26175.89    | 28488.09    |
| 5682.43     | 5457.86     | 5382.00     | 5122.00     | 5473.96     | 5685.77     |
| 1669.98     | 1491.60     | 1895.05     | 2514.18     | 2830.94     | 2912.92     |
| 43.23       | 0           | 0           | 46.66       | 0           | 38.79       |
| 11196.29    | 10620.6     | 11368.05    | 11898.19    | 12833.89    | 13164.48    |
| 5271.53     | 5476.99     | 5891.45     | 6445.64     | 7240.69     | 7391.27     |
| 5335.00     | 5655.51     | 5773.19     | 6506.34     | 6985.99     | 7916.08     |
| 2374.32     | 2212.76     | 2088.62     | 2342.54     | 2400.19     | 2465.14     |
|             |             |             |             |             |             |
| <b>2014</b> | <b>2015</b> | <b>2016</b> | <b>2017</b> | <b>2018</b> | <b>2019</b> |
| 12.98       | 7.8         | 7.42        | 9.26        | 18.18       | 18.74       |
| 27.58       | 53.81       | 59.32       | 44.46       | 25.26       | 31.16       |
| 2.97        | 10.49       | 10.14       | 10.66       | 8.02        | 4.31        |
| 4.61        | 3.86        | 3.63        | 1.37        | 1.55        | 4.67        |
| 95.53       | 84.97       | 68.87       | 67.87       | 72.65       | 94.98       |
| 79.21       | 93.9        | 124.56      | 100.69      | 85.09       | 108.58      |
| 73.58       | 111.07      | 65.76       | 29.25       | 28.56       | 27.88       |
| 19.53       | 18          | 24.15       | 31.96       | 32.95       | 26.32       |
| 10.6        | 14.59       | 4.33        | 6.26        | 10.18       | 16.7        |
| 61.78       | 42.73       | 26.23       | 12.2        | 18.89       | 38.76       |
| 210.19      | 200.4       | 177.92      | 188.66      | 135.84      | 32.77       |
| 107.55      | 93.42       | 56.38       | 80.5        | 141.23      | 192.16      |
| 45.78       | 52.52       | 69.15       | 53.11       | 64.05       | 53.04       |
| 66.44       | 45.03       | 42.72       | 18.44       | 51.4        | 85.91       |
| 0           | 0           | 10.87       | 10.87       | 0           | 0           |
| 63.54       | 56.18       | 59.22       | 69.09       | 54.96       | 48.6        |

|    |             |             |             |             |             |             |
|----|-------------|-------------|-------------|-------------|-------------|-------------|
| 1  |             |             |             |             |             |             |
| 2  | 36.08       | 39.98       | 18.51       | 23.3        | 38.92       | 53.93       |
| 3  | 62.02       | 59.58       | 47.39       | 84.47       | 71.23       | 40.06       |
| 4  |             |             |             |             |             |             |
| 5  | 36.33       | 48.04       | 30.4        | 8.16        | 8.42        | 27.96       |
| 6  |             |             |             |             |             |             |
| 7  |             |             |             |             |             |             |
| 8  | <b>2014</b> | <b>2015</b> | <b>2016</b> | <b>2017</b> | <b>2018</b> | <b>2019</b> |
| 9  | 122.96      | 145.51      | 144.65      | 127.03      | 181.07      | 213.97      |
| 10 |             |             |             |             |             |             |
| 11 | 423.16      | 315.57      | 243         | 257.3       | 261.64      | 253.41      |
| 12 | 29.54       | 26.80       | 20.98       | 24.94       | 39.04       | 35.41       |
| 13 |             |             |             |             |             |             |
| 14 | 35.53       | 41.98       | 35.97       | 21.46       | 21.25       | 23.26       |
| 15 | 658.07      | 651.08      | 693.86      | 662.56      | 649.85      | 644.45      |
| 16 |             |             |             |             |             |             |
| 17 | 1120.83     | 1135.85     | 1248.89     | 1273.00     | 1398.18     | 1824.26     |
| 18 | 918.7       | 1363.36     | 1450.45     | 1033.97     | 987.89      | 2043.24     |
| 19 |             |             |             |             |             |             |
| 20 | 118.83      | 126.50      | 113.79      | 106.80      | 136.27      | 146.98      |
| 21 | 305.76      | 431.98      | 356.16      | 262.60      | 341.72      | 594.16      |
| 22 |             |             |             |             |             |             |
| 23 | 139.49      | 150.32      | 152.86      | 271.04      | 371.61      | 253.68      |
| 24 | 540.28      | 476.43      | 309.99      | 312.12      | 542.15      | 572.56      |
| 25 |             |             |             |             |             |             |
| 26 | 2136.97     | 2484.83     | 2540.07     | 2202.75     | 1911.83     | 1902.49     |
| 27 | 388.35      | 430.29      | 430.77      | 404.95      | 414.89      | 451.71      |
| 28 |             |             |             |             |             |             |
| 29 | 184.19      | 76.42       | 213.84      | 296.67      | 220.45      | 290.64      |
| 30 | 0           | 0           | 0           | 0           | 0           | 0           |
| 31 |             |             |             |             |             |             |
| 32 | 969.51      | 843.17      | 820.23      | 829.34      | 805.39      | 864.34      |
| 33 | 620.40      | 659.97      | 612.15      | 570.57      | 445.28      | 529.63      |
| 34 |             |             |             |             |             |             |
| 35 | 405.89      | 507.77      | 531.70      | 397.22      | 380.08      | 403.68      |
| 36 | 75.55       | 183.77      | 249.72      | 177.50      | 137.68      | 148.87      |
| 37 |             |             |             |             |             |             |
| 38 |             |             |             |             |             |             |
| 39 | <b>2014</b> | <b>2015</b> | <b>2016</b> | <b>2017</b> | <b>2018</b> | <b>2019</b> |
| 40 | 24.35       | 0           | 0           | 0           | 0           | 0           |
| 41 |             |             |             |             |             |             |
| 42 | 597.24      | 553.45      | 625.58      | 543.26      | 268.00      | 247.82      |
| 43 | 0           | 0           | 0           | 0           | 0           | 0           |
| 44 |             |             |             |             |             |             |
| 45 | 4.32        | 4.27        | 4.23        | 13.21       | 14.08       | 17.13       |
| 46 | 3514.81     | 3147.97     | 3230.52     | 3307.98     | 3315.39     | 3776.81     |
| 47 |             |             |             |             |             |             |
| 48 | 976.67      | 998.45      | 1076.64     | 1065.6      | 1194.65     | 1491.94     |
| 49 | 340.21      | 327.09      | 117.33      | 113.03      | 108.60      | 121.46      |
| 50 |             |             |             |             |             |             |
| 51 | 130.71      | 139.49      | 138.61      | 0           | 58.71       | 68.05       |
| 52 | 936.54      | 896.10      | 838.56      | 834.51      | 920.85      | 910.75      |
| 53 |             |             |             |             |             |             |
| 54 | 159.49      | 159.80      | 184.41      | 183.39      | 181.70      | 237.86      |
| 55 | 475.65      | 318.33      | 242.09      | 64.56       | 569.30      | 524.67      |
| 56 |             |             |             |             |             |             |
| 57 | 2685.00     | 2537.14     | 3274.77     | 2774.65     | 1105.85     | 1017.10     |
| 58 | 299.96      | 295.02      | 257.04      | 245.91      | 183.70      | 192.70      |
| 59 | 0           | 0           | 0           | 0           | 0           | 0           |
| 60 | 431.27      | 485.37      | 354.58      | 305.35      | 248.26      | 224.58      |



|    |             |             |             |             |             |             |
|----|-------------|-------------|-------------|-------------|-------------|-------------|
| 1  |             |             |             |             |             |             |
| 2  | 155.26      | 306.04      | 173.72      | 222.79      | 212.66      | 273.83      |
| 3  | 633.35      | 1001.65     | 1008.56     | 1502.64     | 1353.30     | 1166.66     |
| 4  | 541.80      | 544.71      | 641.88      | 0           | 0           | 0           |
| 5  |             |             |             |             |             |             |
| 6  |             |             |             |             |             |             |
| 7  |             |             |             |             |             |             |
| 8  | <b>2014</b> | <b>2015</b> | <b>2016</b> | <b>2017</b> | <b>2018</b> | <b>2019</b> |
| 9  | 169.91      | 143.55      | 290.84      | 216.78      | 199.31      | 270.34      |
| 10 | 194.10      | 348.67      | 231.45      | 264.07      | 290.01      | 653.25      |
| 11 | 182.80      | 111.41      | 80.69       | 152.40      | 577.1       | 43.66       |
| 12 | 89.31       | 106.29      | 85.84       | 55.19       | 76.33       | 84.37       |
| 13 | 3696.26     | 3241.76     | 3097.05     | 3393.64     | 3568.23     | 5128.75     |
| 14 | 5968.05     | 4829.93     | 6481.36     | 5132.2      | 8026.10     | 7273.08     |
| 15 | 2859.72     | 2140.20     | 4737.37     | 4929.55     | 2461.91     | 1190.18     |
| 16 | 267.54      | 1143.03     | 234.52      | 211.01      | 291.24      | 188.14      |
| 17 | 73.45       | 159.59      | 199.27      | 205.96      | 323.00      | 352.57      |
| 18 | 34.13       | 10.27       | 10.31       | 0           | 0           | 36.97       |
| 19 | 112.01      | 277.47      | 253.36      | 304.57      | 417.28      | 220.01      |
| 20 | 1456.02     | 1478.29     | 1902.17     | 2107.76     | 2552.67     | 2365.47     |
| 21 | 1776.41     | 1633.86     | 1466.35     | 1454.22     | 1477.21     | 1365.27     |
| 22 | 385.64      | 424.59      | 391.49      | 382.60      | 203.00      | 520.23      |
| 23 | 0           | 0           | 0           | 0           | 59.53       | 58.82       |
| 24 | 1624.39     | 1785.65     | 1563.86     | 1344.58     | 1522.54     | 2389.77     |
| 25 | 449.29      | 506.26      | 441.85      | 881.23      | 923.37      | 958.93      |
| 26 | 1359.58     | 1590.53     | 1420.41     | 1271.76     | 1548.58     | 157.381     |
| 27 | 790.08      | 667.87      | 736.47      | 770.23      | 687.61      | 1040.73     |
| 28 |             |             |             |             |             |             |
| 29 |             |             |             |             |             |             |
| 30 |             |             |             |             |             |             |
| 31 |             |             |             |             |             |             |
| 32 |             |             |             |             |             |             |
| 33 |             |             |             |             |             |             |
| 34 |             |             |             |             |             |             |
| 35 |             |             |             |             |             |             |
| 36 |             |             |             |             |             |             |
| 37 |             |             |             |             |             |             |
| 38 |             |             |             |             |             |             |

### 2011-2020 by specialty

| 2014      | 2015      | 2016      | 2017      | 2018      | 2019      |
|-----------|-----------|-----------|-----------|-----------|-----------|
| 43,534.29 | 23,741.00 | 58,002.00 | 57,066.00 | 57,560.40 | 60,918.00 |
| 42,836.00 | 49,628.00 | 55,554.00 | 46,238.00 | 58,179.75 | 66,110.00 |
| -         | -         | -         | -         | -         | -         |
| 56,030.00 | 20,307.00 | -         | -         | -         | -         |
| 51,319.95 | 53,518.16 | 53,923.50 | 47,240.95 | 55,961.90 | 61,755.06 |
| 49,647.19 | 50,244.97 | 56,367.65 | 42,558.86 | 56,279.00 | 54,616.14 |
| 51,613.00 | 50,253.00 | 53,844.20 | 58,787.33 | 53,451.73 | 55,313.00 |
| 53,768.00 | 55,170.80 | 57,281.00 | 48,730.00 | 59,250.00 | 62,027.60 |
| 54,536.44 | 53,676.33 | 49,738.75 | 43,040.30 | 59,953.43 | 59,131.89 |
| 46,269.20 | 53,574.33 | 48,082.83 | 55,240.00 | 61,271.14 | 63,762.00 |
| 50,843.50 | 49,508.33 | 57,822.62 | 42,489.86 | 54,204.30 | 62,456.62 |

|    |             |             |             |             |             |             |
|----|-------------|-------------|-------------|-------------|-------------|-------------|
| 1  |             |             |             |             |             |             |
| 2  | 46,494.82   | 52,489.91   | 54,737.84   | 37,180.08   | 61,869.82   | 61,228.88   |
| 3  | 51,190.00   | 48,164.61   | 45,491.18   | 49,132.40   | 58,639.23   | 60,939.11   |
| 4  | 55,982.00   | 40,795.00   | 68,949.00   | 62,763.00   | 61,516.50   | 65,694.00   |
| 5  |             |             |             |             |             |             |
| 6  | -           | -           | -           | -           | -           | 70,552.00   |
| 7  |             |             |             |             |             |             |
| 8  | 48,248.08   | 52,733.33   | 53,797.79   | 40,610.76   | 55,418.88   | 58,605.48   |
| 9  | 55,094.00   | 55,880.00   | 53,115.56   | 47,848.12   | 61,253.57   | 67,271.25   |
| 10 |             |             |             |             |             |             |
| 11 | 51,721.74   | 54,732.95   | 51,360.80   | 55,393.12   | 64,262.30   | 67,220.20   |
| 12 | 44,500.00   | 60,380.00   | 51,878.67   | 39,434.67   | 74,086.00   | 65,606.00   |
| 13 |             |             |             |             |             |             |
| 14 |             |             |             |             |             |             |
| 15 | <b>2014</b> | <b>2015</b> | <b>2016</b> | <b>2017</b> | <b>2018</b> | <b>2019</b> |
| 16 | 191,664.00  | 229,197.30  | 261,418.50  | 214,919.70  | 265,184.00  | 254,169.90  |
| 17 | 167,228.80  | 214,451.50  | 214,313.90  | 206,142.70  | 217,967.20  | 279,571.00  |
| 18 |             |             |             |             |             |             |
| 19 | -           | -           | 168,966.00  | 369,797.00  | 446,984.50  | 458,056.00  |
| 20 | 297,305.80  | 376,785.20  | 332,118.50  | 243,977.20  | 347,868.00  | 368,096.20  |
| 21 | 315,749.30  | 340,196.50  | 351,412.10  | 265,624.40  | 362,508.90  | 387,754.70  |
| 22 | 313,442.20  | 310,645.00  | 332,014.40  | 284,266.30  | 313,233.30  | 259,761.20  |
| 23 | 199,963.30  | 347,813.40  | 363,970.00  | 273,969.30  | 568,351.80  | 611,950.20  |
| 24 | 238,399.90  | 223,788.80  | 244,205.40  | 165,655.80  | 237,966.30  | 220,205.90  |
| 25 | 231,037.90  | 235,602.10  | 214,293.00  | 139,347.60  | 184,728.10  | 187,265.60  |
| 26 | 231,027.90  | 240,819.90  | 239,498.30  | 229,004.50  | 223,953.60  | 239,265.70  |
| 27 | 262,284.30  | 264,087.20  | 251,168.30  | 149,735.40  | 257,186.90  | 267,736.80  |
| 28 | 340,587.00  | 359,971.80  | 343,585.70  | 281,690.50  | 368,287.30  | 386,528.50  |
| 29 | 248,890.50  | 272,019.20  | 292,232.50  | 249,166.00  | 332,139.50  | 338,472.10  |
| 30 | 281,319.30  | 313,034.30  | 250,943.80  | 212,667.80  | 257,476.20  | 315,693.50  |
| 31 |             |             |             |             |             |             |
| 32 | -           | -           | -           | -           | -           | -           |
| 33 | 241,928.30  | 255,408.40  | 286,070.20  | 197,495.20  | 312,247.00  | 333,855.00  |
| 34 | 187,940.40  | 195,605.00  | 266,952.50  | 181,965.90  | 243,591.80  | 259,048.50  |
| 35 | 225,132.50  | 218,762.10  | 251,569.50  | 231,538.90  | 302,109.40  | 307,981.10  |
| 36 | 145,810.40  | 129,597.00  | 151,069.50  | 155,845.80  | 167,294.00  | 247,190.80  |
| 37 |             |             |             |             |             |             |
| 38 |             |             |             |             |             |             |
| 39 |             |             |             |             |             |             |
| 40 |             |             |             |             |             |             |
| 41 |             |             |             |             |             |             |
| 42 |             |             |             |             |             |             |
| 43 |             |             |             |             |             |             |
| 44 |             |             |             |             |             |             |
| 45 |             |             |             |             |             |             |
| 46 |             |             |             |             |             |             |
| 47 |             |             |             |             |             |             |
| 48 |             |             |             |             |             |             |
| 49 |             |             |             |             |             |             |

**amount from 2011-2020 by specialty**

| <b>2014</b> | <b>2015</b> | <b>2016</b> | <b>2017</b> | <b>2018</b> | <b>2019</b> |
|-------------|-------------|-------------|-------------|-------------|-------------|
| 122,631.20  | 176,829.40  | 177,605.20  | 171,822.00  | 151,097.00  | 131,069.00  |
| 111,210.00  | 107,873.70  | 111,286.00  | 116,404.90  | 103,161.40  | 102,986.40  |
| 132,182.00  | 137,936.00  | -           | -           | 40,556.00   | 123,254.00  |
| 128,002.10  | 132,817.90  | 133,941.40  | 135,747.60  | 141,963.10  | 129,695.10  |
| 130,004.80  | 129,290.10  | 132,724.20  | 144,242.50  | 142,969.40  | 143,327.00  |
| 150,252.70  | 147,094.90  | 147,826.80  | 136,708.40  | 138,698.20  | 129,702.90  |
| -           | -           | 104,760.00  | -           | 158,780.50  | 151,324.70  |

|    |             |             |             |             |             |             |
|----|-------------|-------------|-------------|-------------|-------------|-------------|
| 1  |             |             |             |             |             |             |
| 2  | 159,980.20  | 155,728.00  | 148,407.80  | 136,159.00  | 128,488.00  | 127,963.10  |
| 3  | 131,122.00  | -           | -           | 145,208.00  | 126,603.50  | 129,963.00  |
| 4  | 121,495.10  | 110,510.50  | 126,430.90  | 124,989.00  | 123,020.40  | 116,702.50  |
| 5  | 129,952.00  | -           | -           | -           | -           | -           |
| 6  | 107,158.60  | 115,922.80  | 167,622.70  | 161,973.60  | 147,423.50  | 121,876.90  |
| 7  | 129,747.30  | 135,899.90  | 123,447.50  | 137,237.00  | 145,505.60  | 150,086.00  |
| 8  | 122,099.50  | 123,407.00  | 124,027.90  | 129,660.80  | 128,024.50  | 133,554.80  |
| 9  | -           | -           | -           | -           | -           | -           |
| 10 | 152,443.40  | 149,052.30  | 151,938.30  | 149,647.70  | 156,758.20  | 154,175.90  |
| 11 | 143,148.50  | 122,157.10  | 137,792.70  | 142,346.30  | 135,374.40  | 128,713.10  |
| 12 | 126,519.10  | 135,341.40  | 142,970.80  | 160,080.20  | 176,646.70  | 171,699.50  |
| 13 | 137,484.00  | 146,730.30  | 148,409.80  | 141,016.20  | 140,084.40  | 139,784.40  |
| 14 |             |             |             |             |             |             |
| 15 |             |             |             |             |             |             |
| 16 |             |             |             |             |             |             |
| 17 |             |             |             |             |             |             |
| 18 |             |             |             |             |             |             |
| 19 |             |             |             |             |             |             |
| 20 |             |             |             |             |             |             |
| 21 | <b>2014</b> | <b>2015</b> | <b>2016</b> | <b>2017</b> | <b>2018</b> | <b>2019</b> |
| 22 | 151,676.50  | 163,094.40  | 171,524.70  | 166,395.30  | 180,576.00  | 180,629.80  |
| 23 | 108,300.60  | 120,100.30  | 161,198.20  | 139,880.80  | 163,778.70  | 143,989.70  |
| 24 | 148,179.80  | 149,105.00  | 155,894.10  | 162,261.10  | 160,546.60  | 159,030.30  |
| 25 | 137,668.00  | 148,187.00  | 145,819.00  | 168,048.00  | 168,048.00  | 171,562.00  |
| 26 | 142,669.50  | 140,445.70  | 154,266.60  | 162,795.70  | 165,745.00  | 165,870.80  |
| 27 | 175,436.80  | 156,846.60  | 164,111.20  | 183,334.50  | 189,698.70  | 186,428.20  |
| 28 | 164,708.70  | 150,693.80  | 155,605.60  | 158,727.40  | 182,594.00  | 182,323.80  |
| 29 | 119,664.60  | 121,878.00  | 124,569.00  | 166,888.00  | 181,463.60  | 184,982.20  |
| 30 | 212,911.40  | 203,695.00  | 194,094.20  | 203,772.30  | 195,569.10  | 202,154.30  |
| 31 | 109,454.50  | 121,247.50  | 174,153.00  | 171,547.70  | 147,346.10  | 120,988.70  |
| 32 | 183,344.60  | 188,773.70  | 188,130.90  | 187,116.00  | 193,339.30  | 180,546.90  |
| 33 | 147,248.60  | 142,633.30  | 163,702.00  | 152,111.60  | 167,191.40  | 174,799.40  |
| 34 | 143,865.50  | 142,323.10  | 147,470.40  | 161,704.00  | 167,077.30  | 171,653.00  |
| 35 | -           | -           | -           | -           | 171,084.00  | 171,045.00  |
| 36 | -           | -           | -           | -           | -           | -           |
| 37 | 160,774.70  | 168,384.70  | 169,355.80  | 170,572.30  | 160,770.60  | 171,369.90  |
| 38 | 152,487.80  | 138,629.30  | 171,720.00  | 177,445.30  | 203,390.30  | 206,262.70  |
| 39 | 142,876.00  | 142,639.40  | 161,231.70  | 162,646.80  | 166,654.40  | 170,087.20  |
| 40 | 151,479.60  | 165,470.20  | 164,894.80  | 168,676.40  | 166,015.60  | 222,228.60  |
| 41 |             |             |             |             |             |             |
| 42 |             |             |             |             |             |             |
| 43 |             |             |             |             |             |             |
| 44 |             |             |             |             |             |             |
| 45 |             |             |             |             |             |             |
| 46 |             |             |             |             |             |             |
| 47 |             |             |             |             |             |             |
| 48 |             |             |             |             |             |             |
| 49 |             |             |             |             |             |             |
| 50 |             |             |             |             |             |             |
| 51 |             |             |             |             |             |             |
| 52 | <b>2014</b> | <b>2015</b> | <b>2016</b> | <b>2017</b> | <b>2018</b> | <b>2019</b> |
| 53 | 156,572.20  | 154,426.80  | 153,813.90  | 172,864.50  | 179,465.90  | 180,755.90  |
| 54 | 123,012.00  | 85,710.67   | 167,154.20  | 173,453.20  | 151,582.90  | 155,709.10  |
| 55 | 154,124.70  | 147,563.30  | 163,834.90  | 177,780.20  | 175,407     | 178,953.30  |
| 56 | 146,538     | 107,960.80  | 146,244.80  | 161,528     | 160,174.80  | 164,166.00  |
| 57 | 148,408.90  | 147,055.30  | 165,604.00  | 175,093.50  | 178,488.30  | 180,532.60  |
| 58 | 167,642.70  | 165,994.60  | 163,494.20  | 182,582.00  | 176,333.10  | 177,608.00  |

|    |            |            |            |            |            |            |
|----|------------|------------|------------|------------|------------|------------|
| 1  |            |            |            |            |            |            |
| 2  | 173,711.80 | 167,926.40 | 145,447.80 | 183,568.00 | 183,766.00 | 185,417.40 |
| 3  | 121,042.70 | 115,983.90 | 129,604.80 | 163,354.60 | 169,060.50 | 173,401.20 |
| 4  | 203,470.50 | 207,128.10 | 203,477.50 | 217,257.90 | 193,281.00 | 214,918.40 |
| 5  | 106,001.00 | 97,252.50  | 173,299.00 | 173,232.00 | 123,099.70 | 164,554.30 |
| 6  | 211,281.60 | 216,575.50 | 194,894.20 | 202,767.70 | 202,568.80 | 191,398.80 |
| 7  | 135,050.00 | 138,577.00 | 136,984.00 | 146,011.00 | 142,388.00 | 190,080.00 |
| 8  | 136,091.10 | 138,911.50 | 157,733.50 | 175,092.30 | 176,104.60 | 174,308.50 |
| 9  | 136,524.80 | 144,986.60 | 123,112.70 | 165,357.30 | 135,080.00 | 151,405    |
| 10 | -          | -          | -          | -          | -          | -          |
| 11 | 162,780.60 | 156,467.60 | 164,714.30 | 177,292.20 | 173,883.30 | 175,900.20 |
| 12 | 162,607.20 | 161,641    | 173,602.00 | 180,637.50 | 179,685    | 195,696.00 |
| 13 | 142,886.30 | 146,946.70 | 193,953.80 | 178,872.20 | 183,133.10 | 172,933.60 |
| 14 | 155,136.30 | 150,595.50 | 145,359.70 | 156,011.50 | 144,313.00 | 168,459.00 |
| 15 |            |            |            |            |            |            |
| 16 |            |            |            |            |            |            |
| 17 |            |            |            |            |            |            |
| 18 |            |            |            |            |            |            |
| 19 |            |            |            |            |            |            |
| 20 |            |            |            |            |            |            |
| 21 |            |            |            |            |            |            |
| 22 |            |            |            |            |            |            |
| 23 |            |            |            |            |            |            |
| 24 |            |            |            |            |            |            |
| 25 |            |            |            |            |            |            |
| 26 |            |            |            |            |            |            |
| 27 |            |            |            |            |            |            |
| 28 |            |            |            |            |            |            |
| 29 |            |            |            |            |            |            |
| 30 |            |            |            |            |            |            |
| 31 |            |            |            |            |            |            |
| 32 |            |            |            |            |            |            |
| 33 |            |            |            |            |            |            |
| 34 |            |            |            |            |            |            |
| 35 |            |            |            |            |            |            |
| 36 |            |            |            |            |            |            |
| 37 |            |            |            |            |            |            |
| 38 |            |            |            |            |            |            |
| 39 |            |            |            |            |            |            |
| 40 |            |            |            |            |            |            |
| 41 |            |            |            |            |            |            |
| 42 |            |            |            |            |            |            |
| 43 |            |            |            |            |            |            |
| 44 |            |            |            |            |            |            |
| 45 |            |            |            |            |            |            |
| 46 |            |            |            |            |            |            |
| 47 |            |            |            |            |            |            |
| 48 |            |            |            |            |            |            |
| 49 |            |            |            |            |            |            |
| 50 |            |            |            |            |            |            |
| 51 |            |            |            |            |            |            |
| 52 |            |            |            |            |            |            |
| 53 |            |            |            |            |            |            |
| 54 |            |            |            |            |            |            |
| 55 |            |            |            |            |            |            |
| 56 |            |            |            |            |            |            |
| 57 |            |            |            |            |            |            |
| 58 |            |            |            |            |            |            |
| 59 |            |            |            |            |            |            |
| 60 |            |            |            |            |            |            |

#### ling amount from 2011-2020 by specialty

|  | 2014       | 2015       | 2016       | 2017       | 2018       | 2019       |
|--|------------|------------|------------|------------|------------|------------|
|  | 388,318.40 | 397,822.70 | 406,701.40 | 407,569.50 | 421,265.70 | 442,363.80 |
|  | 339,497.10 | 343,133.50 | 378,646.10 | 376,141.70 | 401,937.20 | 407,364.50 |
|  | 470,284.20 | 426,357.60 | 487,572.10 | 508,476.20 | 493,767.40 | 575,232.50 |
|  | 495,950.50 | 506,253.30 | 545,224.90 | 554,983.50 | 600,927.30 | 516,841.30 |
|  | 418,406.80 | 425,024.90 | 444,284.30 | 460,866.00 | 476,968.20 | 496,173.70 |
|  | 416,205.80 | 415,876.30 | 454,982.50 | 501,719.70 | 527,246.30 | 523,779.60 |
|  | 363,622.60 | 380,344.00 | 392,876.40 | 396,933.90 | 405,769.40 | 419,080.50 |
|  | 366,529.30 | 395,003.60 | 414,115.00 | 426,231.40 | 462,369.60 | 470,195.60 |
|  | 420,905.30 | 413,073.10 | 423,610.60 | 413,586.50 | 415,660.80 | 427,374.40 |
|  | 358,600.80 | 347,868.40 | 359,813.70 | 376,507.60 | 393,633.10 | 400,186.80 |
|  | 370,305.90 | 386,724.90 | 405,442.80 | 444,403.50 | 441,687.90 | 468,107.80 |
|  | 361,413.00 | 377,671.50 | 394,893.70 | 419,394.60 | 430,887.60 | 438,169.00 |
|  | 423,225.40 | 439,247.30 | 436,498.90 | 440,801.40 | 452,563.40 | 469,564.00 |
|  | 407,791.90 | 402,030.10 | 417,519.40 | 469,798.90 | 450,826.50 | 466,402.00 |
|  | 301,765.00 | -          | -          | 333,250.00 | -          | 283,822.00 |
|  | 468,794.70 | 487,565.50 | 510,225.30 | 526,123.20 | 549,594.60 | 565,533.20 |
|  | 406,717.20 | 420,650.40 | 463,276.00 | 488,275.40 | 483,962.90 | 505,359.40 |
|  | 374,795.10 | 396,734.30 | 414,811.60 | 424,301.40 | 429,044.80 | 450,705.20 |
|  | 305,833.90 | 344,487.90 | 343,386.80 | 380,988.50 | 402,471.80 | 412,244.80 |
|  |            |            |            |            |            |            |
|  | 2014       | 2015       | 2016       | 2017       | 2018       | 2019       |
|  | 88,809.17  | 80,643.50  | 77,053.25  | 64,444.67  | 84,861.11  | 99,035.62  |
|  | 79,536.50  | 78,739.62  | 78,298.56  | 76,541.71  | 77,562.50  | 97,484.25  |

|    |             |             |             |             |             |             |
|----|-------------|-------------|-------------|-------------|-------------|-------------|
| 1  |             |             |             |             |             |             |
| 2  | 114,000.00  | 103,827.20  | 103,872.80  | 90,322.40   | 87,723.75   | 97,375.00   |
| 3  | 72,566.71   | 71,569.67   | 81,500.40   | 77,791.50   | 89,625.00   | 110,513.00  |
| 4  | 86,721.70   | 88,129.27   | 87,862.07   | 86,184.46   | 83,945.14   | 95,116.11   |
| 5  | 87,614.08   | 96,734.08   | 105,522.80  | 92,073.53   | 79,031.53   | 102,401.90  |
| 6  | 77,379.40   | 84,825.57   | 89,403.75   | 80,900.00   | 80,539.50   | 80,125.00   |
| 7  | 66,966.33   | 74,648.30   | 91,245.82   | 88,747.40   | 81,769.53   | 80,324.57   |
| 8  | 97,812.50   | 90,412.67   | 81,000.00   | 117,750.00  | 97,000.00   | 107,491.00  |
| 9  | 84,992.50   | 81,801.70   | 71,470.57   | 77,298.33   | 119,874.70  | 105,583.60  |
| 10 | 131,234.80  | 134,709.60  | 140,382.80  | 149,760.80  | 131,110.40  | 160,218.00  |
| 11 | 72,582.80   | 82,741.27   | 81,826.56   | 86,125.00   | 85,686.81   | 93,440.08   |
| 12 | 76,619.09   | 88,884.12   | 93,250.40   | 88,673.74   | 92,985.63   | 84,607.97   |
| 13 | 85,749.29   | 82,524.80   | 79,055.80   | 57,416.33   | 122,787.50  | 119,870.90  |
| 14 | -           | -           | 77,000.00   | 77,625.00   | -           | -           |
| 15 | 108,346.70  | 105,996.80  | 97,768.48   | 91,020.66   | 92,001.78   | 94,258.75   |
| 16 | 81,043.88   | 73,541.19   | 80,722.22   | 84,385.64   | 87,718.83   | 101,238.20  |
| 17 | 92,010.12   | 79,187.47   | 85,131.93   | 84,614.60   | 85,822.24   | 93,100.45   |
| 18 | 88,901.00   | 94,229.60   | 99,951.67   | 81,000.00   | 84,750.00   | 95,083.67   |
| 19 |             |             |             |             |             |             |
| 20 | <b>2014</b> | <b>2015</b> | <b>2016</b> | <b>2017</b> | <b>2018</b> | <b>2019</b> |
| 21 | 240,374.70  | 214,890.20  | 222,642.60  | 204,033.30  | 205,608.50  | 231,893.00  |
| 22 | 187,726.20  | 175,905.80  | 206,179.00  | 206,712.70  | 200,869.70  | 211,443.40  |
| 23 | 226,948.40  | 176,774.30  | 171,878.60  | 150,868.10  | 170,914.20  | 266,771.70  |
| 24 | 195,614.40  | 194,681.40  | 175,792.70  | 173,967.60  | 205,190.60  | 171,800.00  |
| 25 | 201,298.10  | 195,991.70  | 202,211.70  | 204,170.20  | 203,708.00  | 205,422.00  |
| 26 | 203,806.60  | 211,268.70  | 214,279.00  | 212,947.40  | 209,448.60  | 241,177.10  |
| 27 | 230,048.00  | 208,243.30  | 219,118.90  | 211,809.70  | 214,277.20  | 286,452.30  |
| 28 | 195,606.80  | 218,635.10  | 197,080.80  | 211,848.40  | 205,317.70  | 190,272.70  |
| 29 | 194,578.50  | 223,106.90  | 195,940.80  | 205,887.20  | 210,155.00  | 224,989.80  |
| 30 | 179,097.70  | 179,869.40  | 182,221.90  | 198,079.80  | 196,486.30  | 186,053.10  |
| 31 | 180,714.10  | 194,943.90  | 209,649.70  | 198,219.80  | 168,791.10  | 186,598.10  |
| 32 | 206,034.70  | 206,334.40  | 199,877.40  | 204,935.70  | 208,193.80  | 212,859.80  |
| 33 | 204,612.00  | 204,628.20  | 203,089.60  | 203,995.10  | 209,293.80  | 215,602.60  |
| 34 | 184,909.80  | 175,084.50  | 219,859.90  | 213,217.90  | 210,636.60  | 218,363.20  |
| 35 | -           | -           | -           | -           | -           | -           |
| 36 | 203,195.30  | 203,961.00  | 206,254.10  | 207,092.30  | 208,095.90  | 216,318.70  |
| 37 | 206,031.30  | 210,710.10  | 203,560.50  | 197,694.80  | 202,985.80  | 212,349.50  |
| 38 | 213,268.20  | 206,825.20  | 196,633.60  | 198,945.20  | 196,267.10  | 202,344.50  |
| 39 | 184,901.50  | 180,240.60  | 189,491.20  | 195,661.90  | 197,886.00  | 189,822.10  |
| 40 |             |             |             |             |             |             |
| 41 | <b>2014</b> | <b>2015</b> | <b>2016</b> | <b>2017</b> | <b>2018</b> | <b>2019</b> |
| 42 | 999,665.00  | -           | -           | -           | -           | -           |
| 43 | 626,258.90  | 809,839.80  | 619,243.90  | 595,169.40  | 658,403.00  | 775,427.80  |
| 44 | -           | -           | -           | -           | -           | -           |

|    |              |              |              |              |              |              |
|----|--------------|--------------|--------------|--------------|--------------|--------------|
| 1  |              |              |              |              |              |              |
| 2  | 118,786.20   | 118,793.20   | 118,769.50   | 1,499,404.00 | 1,631,702.00 | 506,108.00   |
| 3  | 1,595,381.00 | 1,386,675.00 | 1,343,980.00 | 1,410,555.00 | 1,289,653.00 | 1,454,688.00 |
| 4  | 926,021.70   | 955,091.90   | 972,888.10   | 913,550.00   | 924,625.30   | 1,004,999.00 |
| 5  | 894,494.50   | 874,301.50   | 638,089.00   | 625,169.00   | 612,461.00   | 349,065.00   |
| 6  | 1,793,093.00 | 1,157,198.00 | 960,318.00   | -            | 825,564.00   | 484,487.50   |
| 7  | 595,992.60   | 595,040.80   | 627,412.80   | 628,117.10   | 566,308.50   | 676,475.90   |
| 8  | 614,321.00   | 611,879.20   | 703,440.00   | 696,916.40   | 691,739.60   | 755,961.70   |
| 9  | 556,833.40   | 499,296.20   | 458,450.40   | 614,973.00   | 1,831,543.00 | 5,129,654.00 |
| 10 | 1,575,747.00 | 1,348,339.00 | 1,711,069.00 | 1,424,948.00 | 704,481.40   | 989,077.50   |
| 11 | 948,261.30   | 943,137.20   | 828,083.70   | 898,125.40   | 911,258.60   | 834,352.40   |
| 12 | -            | -            | -            | -            | -            | -            |
| 13 | -            | -            | -            | -            | -            | -            |
| 14 | 1,078,633.00 | 964,003.10   | 1,121,970.00 | 1,060,552.00 | 1,061,952.00 | 791,983.70   |
| 15 | 847,082.90   | 1,477,880.00 | 973,777.90   | 887,744.60   | 862,805.50   | 942,347.40   |
| 16 | 1,331,107.00 | 1,580,976.00 | 1,334,913.00 | 1,881,459.00 | 1,268,240.00 | 1,355,662.00 |
| 17 | 883,989.70   | 890,415.50   | 703,540.90   | -            | -            | -            |
| 18 |              |              |              |              |              |              |
| 19 |              |              |              |              |              |              |
| 20 |              |              |              |              |              |              |
| 21 |              |              |              |              |              |              |
| 22 |              |              |              |              |              |              |
| 23 |              |              |              |              |              |              |
| 24 |              |              |              |              |              |              |
| 25 |              |              |              |              |              |              |
| 26 | <b>2014</b>  | <b>2015</b>  | <b>2016</b>  | <b>2017</b>  | <b>2018</b>  | <b>2019</b>  |
| 27 | 581,282.50   | 659,561.00   | 805,747.30   | 646,645.70   | 558,255.40   | 952,199.00   |
| 28 | 373,138.20   | 510,195.50   | 549,849.80   | 636,470.60   | 593,721.30   | 908,451.60   |
| 29 | 501,535.70   | 551,203.10   | 661,067.80   | 1,613,430.00 | 3,157,825.00 | 657,901.70   |
| 30 | 893,927.70   | 788,654.90   | 643,250.80   | 481,880.50   | 589,515.60   | 664,795.80   |
| 31 | 1,092,75.00  | 886,928.90   | 858,966.50   | 893,301.00   | 856,548.70   | 1,092,779.00 |
| 32 | 1,467,034.00 | 1,155,044.00 | 1,126,302.00 | 1,135,458.00 | 1,597,367.00 | 1,513,014.00 |
| 33 | 2,148,264.00 | 880,115.20   | 954,229.30   | 1,090,613.00 | 661,140.50   | 684,117.00   |
| 34 | 846,932.70   | 2,061,479.00 | 749,891.80   | 549,367.70   | 1,023,898.00 | 893,043.90   |
| 35 | 271,115.80   | 593,446.80   | 745,473.40   | 645,930.80   | 615,781.70   | 567,401.30   |
| 36 | 328,701.50   | 196,680.00   | 196,680.00   | -            | -            | 705,076.00   |
| 37 | 262,256.00   | 870,422.00   | 799,632.30   | 725,323.20   | 805,466.80   | 537,763.50   |
| 38 | 595,558.00   | 677,260.50   | 776,469.70   | 845,671.50   | 929,243.10   | 787,017.40   |
| 39 | 842,353.10   | 758,205.00   | 825,554.30   | 779,608.50   | 799,393.60   | 745,582.70   |
| 40 | 497,752.60   | 486,371.40   | 724,539.40   | 714,931.60   | 323,280.20   | 1,693,692.00 |
| 41 | -            | -            | -            | -            | 430,375.00   | 430,374.00   |
| 42 | 716,949.10   | 647,915.90   | 715,427.10   | 684,931.10   | 666,083.20   | 1,007,650.00 |
| 43 | 659,958.20   | 575,229.00   | 597,857.80   | 877,838.40   | 693,746.60   | 707,158.00   |
| 44 | 729,561.00   | 787,591.30   | 760,011.10   | 612,448.50   | 621,961.60   | 704,749.40   |
| 45 | 386,726.50   | 385,323.20   | 454,059.60   | 402,182.40   | 532,157.50   | 707,767.40   |
| 46 |              |              |              |              |              |              |
| 47 |              |              |              |              |              |              |
| 48 |              |              |              |              |              |              |
| 49 |              |              |              |              |              |              |
| 50 |              |              |              |              |              |              |
| 51 |              |              |              |              |              |              |
| 52 |              |              |              |              |              |              |
| 53 |              |              |              |              |              |              |
| 54 |              |              |              |              |              |              |
| 55 |              |              |              |              |              |              |
| 56 |              |              |              |              |              |              |
| 57 |              |              |              |              |              |              |
| 58 |              |              |              |              |              |              |
| 59 |              |              |              |              |              |              |
| 60 |              |              |              |              |              |              |

|    |             |
|----|-------------|
| 1  |             |
| 2  |             |
| 3  |             |
| 4  | <b>2020</b> |
| 5  |             |
| 6  | 6           |
| 7  |             |
| 8  | 3           |
| 9  |             |
| 10 | 1           |
| 11 |             |
| 12 | 0           |
| 13 |             |
| 14 | 116         |
| 15 |             |
| 16 | 22          |
| 17 |             |
| 18 | 12          |
| 19 |             |
| 20 | 5           |
| 21 |             |
| 22 | 10          |
| 23 |             |
| 24 | 7           |
| 25 |             |
| 26 | 6           |
| 27 |             |
| 28 | 13          |
| 29 |             |
| 30 | 12          |
| 31 |             |
| 32 | 2           |
| 33 |             |
| 34 | 0           |
| 35 |             |
| 36 | 32          |
| 37 |             |
| 38 | 7           |
| 39 |             |
| 40 | 15          |
| 41 |             |
| 42 | 1           |
| 43 |             |
| 44 | <b>2020</b> |
| 45 |             |
| 46 | 15          |
| 47 |             |
| 48 | 8           |
| 49 |             |
| 50 | 2           |
| 51 |             |
| 52 | 5           |
| 53 |             |
| 54 | 365         |
| 55 |             |
| 56 | 37          |
| 57 |             |
| 58 | 8           |
| 59 |             |
| 60 | 11          |
|    |             |
|    | 23          |
|    |             |
|    | 8           |
|    |             |
|    | 16          |
|    |             |
|    | 55          |
|    |             |
|    | 72          |
|    |             |
|    | 5           |
|    |             |
|    | 0           |
|    |             |
|    | 71          |
|    |             |
|    | 26          |

For peer review only

|    |             |
|----|-------------|
| 1  |             |
| 2  | 55          |
| 3  |             |
| 4  | 4           |
| 5  |             |
| 6  |             |
| 7  |             |
| 8  |             |
| 9  |             |
| 10 | <b>2020</b> |
| 11 |             |
| 12 | 7           |
| 13 | 8           |
| 14 |             |
| 15 | 2           |
| 16 |             |
| 17 | 15          |
| 18 | 176         |
| 19 | 19          |
| 20 |             |
| 21 | 3           |
| 22 |             |
| 23 | 8           |
| 24 |             |
| 25 | 1           |
| 26 |             |
| 27 | 5           |
| 28 |             |
| 29 | 1           |
| 30 |             |
| 31 | 21          |
| 32 |             |
| 33 | 27          |
| 34 |             |
| 35 | 12          |
| 36 |             |
| 37 | 0           |
| 38 |             |
| 39 | 81          |
| 40 |             |
| 41 | 11          |
| 42 |             |
| 43 | 7           |
| 44 |             |
| 45 | 6           |
| 46 |             |
| 47 |             |
| 48 |             |
| 49 |             |
| 50 |             |
| 51 |             |
| 52 |             |
| 53 |             |
| 54 |             |
| 55 |             |
| 56 |             |
| 57 |             |
| 58 |             |
| 59 |             |
| 60 |             |
|    | <b>2020</b> |
|    |             |
|    | 23          |
|    |             |
|    | 10          |
|    |             |
|    | 7           |
|    |             |
|    | 3           |
|    |             |
|    | 274         |
|    |             |
|    | 39          |
|    |             |
|    | 10          |
|    |             |
|    | 9           |
|    |             |
|    | 25          |
|    |             |
|    | 7           |
|    |             |
|    | 10          |
|    |             |
|    | 30          |
|    |             |
|    | 109         |

For peer review only



|    |             |
|----|-------------|
| 1  |             |
| 2  | 1           |
| 3  |             |
| 4  | 0           |
| 5  | 24          |
| 6  | 18          |
| 7  | 48          |
| 8  | 5           |
| 9  |             |
| 10 |             |
| 11 |             |
| 12 | <b>2020</b> |
| 13 |             |
| 14 | 17          |
| 15 | 8           |
| 16 | 15          |
| 17 | 7           |
| 18 |             |
| 19 | 286         |
| 20 | 57          |
| 21 | 6           |
| 22 | 12          |
| 23 | 20          |
| 24 | 4           |
| 25 | 12          |
| 26 | 3           |
| 27 | 129         |
| 28 | 3           |
| 29 | 0           |
| 30 | 113         |
| 31 | 3           |
| 32 | 13          |
| 33 | 3           |
| 34 | 188         |
| 35 | 860         |
| 36 | 791         |
| 37 | 60          |
| 38 | 0           |
| 39 | 932         |
| 40 | 619         |
| 41 | 489         |
| 42 | 67          |
| 43 |             |
| 44 |             |
| 45 |             |
| 46 |             |
| 47 |             |
| 48 |             |
| 49 |             |
| 50 |             |
| 51 |             |
| 52 |             |
| 53 |             |
| 54 |             |
| 55 |             |
| 56 |             |
| 57 |             |
| 58 |             |
| 59 |             |
| 60 |             |

For peer review only

|    |             |
|----|-------------|
| 1  |             |
| 2  | <b>2020</b> |
| 3  |             |
| 4  | 264         |
| 5  | 110         |
| 6  | 74          |
| 7  |             |
| 8  | 99          |
| 9  | 3455        |
| 10 |             |
| 11 | 704         |
| 12 | 223         |
| 13 |             |
| 14 | 231         |
| 15 | 468         |
| 16 |             |
| 17 | 178         |
| 18 | 188         |
| 19 |             |
| 20 | 860         |
| 21 | 791         |
| 22 |             |
| 23 | 60          |
| 24 | 0           |
| 25 |             |
| 26 | 932         |
| 27 | 619         |
| 28 |             |
| 29 | 489         |
| 30 | 67          |
| 31 |             |
| 32 |             |
| 33 | <b>2020</b> |
| 34 | 5           |
| 35 | 5           |
| 36 | 5           |
| 37 | 4           |
| 38 |             |
| 39 | 3           |
| 40 |             |
| 41 | 121         |
| 42 | 13          |
| 43 | 6           |
| 44 |             |
| 45 | 10          |
| 46 | 3           |
| 47 |             |
| 48 | 7           |
| 49 | 3           |
| 50 |             |
| 51 | 25          |
| 52 | 35          |
| 53 |             |
| 54 | 8           |
| 55 | 0           |
| 56 |             |
| 57 | 16          |
| 58 | 22          |
| 59 | 15          |
| 60 | 4           |

For peer review only

|    |             |
|----|-------------|
| 1  |             |
| 2  |             |
| 3  |             |
| 4  | <b>2020</b> |
| 5  | 33          |
| 6  | 20          |
| 7  | 5           |
| 8  | 16          |
| 9  | 385         |
| 10 | 70          |
| 11 | 33          |
| 12 | 43          |
| 13 | 52          |
| 14 | 27          |
| 15 | 33          |
| 16 | 108         |
| 17 | 132         |
| 18 | 9           |
| 19 | 0           |
| 20 | 158         |
| 21 | 101         |
| 22 | 54          |
| 23 | 10          |
| 24 |             |
| 25 |             |
| 26 | <b>2020</b> |
| 27 | 0           |
| 28 | 4           |
| 29 | 0           |
| 30 | 4           |
| 31 | 364         |
| 32 | 32          |
| 33 | 0           |
| 34 | 10          |
| 35 | 26          |
| 36 | 6           |
| 37 | 6           |
| 38 | 15          |
| 39 | 25          |
| 40 | 0           |
| 41 | 0           |
| 42 | 9           |
| 43 | 11          |
| 44 | 29          |

For peer review only

|    |             |
|----|-------------|
| 1  |             |
| 2  | 0           |
| 3  |             |
| 4  |             |
| 5  | <b>2020</b> |
| 6  | 13          |
| 7  |             |
| 8  | 11          |
| 9  | 7           |
| 10 |             |
| 11 | 10          |
| 12 | 589         |
| 13 |             |
| 14 | 76          |
| 15 | 8           |
| 16 |             |
| 17 | 11          |
| 18 | 8           |
| 19 |             |
| 20 | 1           |
| 21 | 4           |
| 22 |             |
| 23 | 37          |
| 24 | 110         |
| 25 |             |
| 26 | 3           |
| 27 | 1           |
| 28 |             |
| 29 | 79          |
| 30 | 49          |
| 31 |             |
| 32 | 58          |
| 33 | 14          |
| 34 |             |
| 35 |             |
| 36 |             |
| 37 |             |
| 38 |             |
| 39 |             |
| 40 |             |
| 41 |             |
| 42 | <b>2020</b> |
| 43 |             |
| 44 | 7045        |
| 45 | 4172        |
| 46 |             |
| 47 | 45202       |
| 48 | -           |
| 49 |             |
| 50 | 1036        |
| 51 | 643         |
| 52 |             |
| 53 | 479         |
| 54 | 8544        |
| 55 |             |
| 56 | 1931        |
| 57 | 2724        |
| 58 |             |
| 59 | 1630        |
| 60 | 973         |

For peer review only

|    |             |
|----|-------------|
| 1  |             |
| 2  | 5052        |
| 3  | 4884        |
| 4  |             |
| 5  | -           |
| 6  | 1212        |
| 7  | 5900        |
| 8  | 1704        |
| 9  | 10201       |
| 10 |             |
| 11 |             |
| 12 |             |
| 13 | <b>2020</b> |
| 14 | 2818        |
| 15 | 1565        |
| 16 | 22601       |
| 17 | 23640       |
| 18 | 329         |
| 19 | 382         |
| 20 | 719         |
| 21 | 3884        |
| 22 | 840         |
| 23 | 2384        |
| 24 | 611         |
| 25 | 230         |
| 26 | 842         |
| 27 | 1953        |
| 28 | -           |
| 29 | 546         |
| 30 | 1588        |
| 31 | 465         |
| 32 | 2550        |
| 33 |             |
| 34 |             |
| 35 |             |
| 36 |             |
| 37 |             |
| 38 |             |
| 39 |             |
| 40 |             |
| 41 |             |
| 42 |             |
| 43 |             |
| 44 |             |
| 45 |             |
| 46 |             |
| 47 | <b>2020</b> |
| 48 | 6038        |
| 49 | 1565        |
| 50 | 22601       |
| 51 | 7880        |
| 52 | 683         |
| 53 | 745         |
| 54 | 1916        |
| 55 | 5340        |
| 56 | 19312       |
| 57 |             |
| 58 |             |
| 59 |             |
| 60 |             |

For peer review only

|    |             |
|----|-------------|
| 1  |             |
| 2  | 3814        |
| 3  | 9777        |
| 4  | 602         |
| 5  | 2245        |
| 6  | 814         |
| 7  | -           |
| 8  | 479         |
| 9  | 3754        |
| 10 | 3652        |
| 11 | 1700        |
| 12 |             |
| 13 |             |
| 14 | <b>2020</b> |
| 15 | 2113        |
| 16 | 1252        |
| 17 | 7534        |
| 18 | 39399       |
| 19 | 452         |
| 20 | 393         |
| 21 | 575         |
| 22 | 6103        |
| 23 | 805         |
| 24 | 3178        |
| 25 | 978         |
| 26 | 506         |
| 27 | 606         |
| 28 | 9767        |
| 29 | -           |
| 30 | 1616        |
| 31 | 2429        |
| 32 | 568         |
| 33 | 2040        |
| 34 |             |
| 35 |             |
| 36 | <b>2020</b> |
| 37 | 2486        |
| 38 | 1565        |
| 39 | 3013        |
| 40 | 16885       |
| 41 | 420         |
| 42 | 248         |
| 43 | 958         |
| 44 | 3560        |

For peer review only

|    |             |
|----|-------------|
| 1  |             |
| 2  | 966         |
| 3  | 4767        |
| 4  | 815         |
| 5  | 4214        |
| 6  | 470         |
| 7  | 3256        |
| 8  |             |
| 9  | -           |
| 10 | 343         |
| 11 | 13766       |
| 12 | 1966        |
| 13 | 3400        |
| 14 |             |
| 15 |             |
| 16 |             |
| 17 |             |
| 18 |             |
| 19 |             |
| 20 |             |
| 21 |             |
| 22 |             |
| 23 | <b>2020</b> |
| 24 | 160         |
| 25 | 114         |
| 26 | 611         |
| 27 | 1194        |
| 28 | 35          |
| 29 | 20          |
| 30 | 26          |
| 31 | 185         |
| 32 | 41          |
| 33 | 107         |
| 34 | 52          |
| 35 | 15          |
| 36 | 77          |
| 37 | 163         |
| 38 | -           |
| 39 | 42          |
| 40 | 67          |
| 41 | 52          |
| 42 | 152         |
| 43 |             |
| 44 |             |
| 45 | <b>2020</b> |
| 46 | 8453        |
| 47 | 2503        |
| 48 | 11301       |
| 49 | 39399       |
| 50 |             |
| 51 |             |
| 52 |             |
| 53 |             |
| 54 |             |
| 55 |             |
| 56 |             |
| 57 |             |
| 58 |             |
| 59 |             |
| 60 |             |

For peer review only

|    |             |
|----|-------------|
| 1  |             |
| 2  | 993         |
| 3  |             |
| 4  | 1088        |
| 5  |             |
| 6  | 958         |
| 7  |             |
| 8  | 4272        |
| 9  |             |
| 10 | 6437        |
| 11 |             |
| 12 | 2724        |
| 13 |             |
| 14 | 3259        |
| 15 |             |
| 16 | 506         |
| 17 |             |
| 18 | 1732        |
| 19 |             |
| 20 | 1221        |
| 21 |             |
| 22 | -           |
| 23 |             |
| 24 | 2425        |
| 25 |             |
| 26 | 1877        |
| 27 |             |
| 28 | 1704        |
| 29 |             |
| 30 | 2550        |
| 31 |             |
| 32 |             |
| 33 |             |
| 34 | <b>2020</b> |
| 35 |             |
| 36 | 1281        |
| 37 |             |
| 38 | 626         |
| 39 |             |
| 40 | 9040        |
| 41 |             |
| 42 | 7387        |
| 43 |             |
| 44 | 312         |
| 45 |             |
| 46 | 202         |
| 47 |             |
| 48 | 174         |
| 49 |             |
| 50 | 993         |
| 51 |             |
| 52 | 371         |
| 53 |             |
| 54 | 706         |
| 55 |             |
| 56 | 296         |
| 57 |             |
| 58 | 117         |
| 59 |             |
| 60 | 459         |
|    |             |
|    | 1085        |
|    |             |
|    | -           |
|    |             |
|    | 246         |
|    |             |
|    | 409         |
|    |             |
|    | 473         |
|    |             |
|    | 1020        |
|    |             |
|    |             |
|    | <b>2020</b> |
|    |             |
|    | -           |
|    |             |
|    | 3129        |
|    |             |
|    | -           |

For peer review only



|    |             |
|----|-------------|
| 1  |             |
| 2  | 29550       |
| 3  |             |
| 4  | 330         |
| 5  |             |
| 6  | 442         |
| 7  |             |
| 8  | -           |
| 9  |             |
| 10 | 4272        |
| 11 |             |
| 12 | 743         |
| 13 |             |
| 14 | 3178        |
| 15 |             |
| 16 | 1630        |
| 17 |             |
| 18 | 843         |
| 19 |             |
| 20 | 2425        |
| 21 |             |
| 22 | -           |
| 23 |             |
| 24 | -           |
| 25 |             |
| 26 |             |
| 27 | 4310        |
| 28 |             |
| 29 | 3754        |
| 30 |             |
| 31 | 882         |
| 32 |             |
| 33 | -           |
| 34 |             |
| 35 |             |
| 36 |             |
| 37 | <b>2020</b> |
| 38 |             |
| 39 | 3251        |
| 40 |             |
| 41 | 1138        |
| 42 |             |
| 43 | 6457        |
| 44 |             |
| 45 | 11820       |
| 46 |             |
| 47 | 204         |
| 48 |             |
| 49 | 186         |
| 50 |             |
| 51 | 719         |
| 52 |             |
| 53 | 3884        |
| 54 |             |
| 55 | 2414        |
| 56 |             |
| 57 | 19069       |
| 58 |             |
| 59 | 2444        |
| 60 |             |
|    | 342         |
|    | 551         |
|    | 3256        |
|    | 7317        |
|    | 491         |
|    | 843         |
|    | 441         |
|    | 729         |

For peer review only

|    |             |
|----|-------------|
| 1  |             |
| 2  |             |
| 3  |             |
| 4  | <b>2020</b> |
| 5  |             |
| 6  | 390         |
| 7  |             |
| 8  | 198         |
| 9  |             |
| 10 | 65          |
| 11 |             |
| 12 | 0           |
| 13 |             |
| 14 | 7700        |
| 15 |             |
| 16 | 1393        |
| 17 |             |
| 18 | 726         |
| 19 |             |
| 20 | 304         |
| 21 |             |
| 22 | 567         |
| 23 |             |
| 24 | 471         |
| 25 |             |
| 26 | 434         |
| 27 |             |
| 28 | 726         |
| 29 |             |
| 30 | 667         |
| 31 |             |
| 32 | 137         |
| 33 |             |
| 34 | 0           |
| 35 |             |
| 36 | 2021        |
| 37 |             |
| 38 | 456         |
| 39 |             |
| 40 | 1091        |
| 41 |             |
| 42 | 80          |
| 43 |             |
| 44 |             |
| 45 | <b>2020</b> |
| 46 |             |
| 47 | 4496        |
| 48 |             |
| 49 | 2035        |
| 50 |             |
| 51 | 731         |
| 52 |             |
| 53 | 1750        |
| 54 |             |
| 55 | 139263      |
| 56 |             |
| 57 | 11524       |
| 58 |             |
| 59 | 4010        |
| 60 |             |
|    | 2863        |
|    | 4752        |
|    | 2073        |
|    | 4832        |
|    | 20179       |
|    | 25786       |
|    | 1605        |
|    | 0           |
|    | 26075       |
|    | 6639        |

For peer review only

|    |             |
|----|-------------|
| 1  |             |
| 2  | 16442       |
| 3  |             |
| 4  | 1156        |
| 5  |             |
| 6  |             |
| 7  |             |
| 8  |             |
| 9  |             |
| 10 | <b>2020</b> |
| 11 |             |
| 12 | 990         |
| 13 | 940         |
| 14 |             |
| 15 | 247         |
| 16 |             |
| 17 | 2082        |
| 18 | 24771       |
| 19 | 2344        |
| 20 |             |
| 21 | 328         |
| 22 | 1114        |
| 23 |             |
| 24 | 145         |
| 25 | 588         |
| 26 |             |
| 27 | 130         |
| 28 | 2764        |
| 29 |             |
| 30 | 3592        |
| 31 | 1510        |
| 32 | 0           |
| 33 |             |
| 34 | 12219       |
| 35 | 1512        |
| 36 |             |
| 37 | 1012        |
| 38 |             |
| 39 | 869         |
| 40 |             |
| 41 | <b>2020</b> |
| 42 |             |
| 43 | 3980        |
| 44 | 1629        |
| 45 |             |
| 46 | 1121        |
| 47 | 504         |
| 48 |             |
| 49 | 47123       |
| 50 | 7391        |
| 51 |             |
| 52 | 1805        |
| 53 | 1675        |
| 54 |             |
| 55 | 4877        |
| 56 | 990         |
| 57 |             |
| 58 | 1880        |
| 59 | 5225        |
| 60 | 18773       |

For peer review only

|    |             |
|----|-------------|
| 1  |             |
| 2  | 172         |
| 3  | 0           |
| 4  |             |
| 5  | 4261        |
| 6  | 3757        |
| 7  |             |
| 8  | 8321        |
| 9  | 1098        |
| 10 |             |
| 11 |             |
| 12 | <b>2020</b> |
| 13 |             |
| 14 | 2977        |
| 15 | 1339        |
| 16 |             |
| 17 | 2590        |
| 18 | 1100        |
| 19 |             |
| 20 | 50235       |
| 21 | 10534       |
| 22 |             |
| 23 | 1123        |
| 24 | 2034        |
| 25 |             |
| 26 | 4234        |
| 27 | 548         |
| 28 |             |
| 29 | 1823        |
| 30 | 528         |
| 31 |             |
| 32 | 22283       |
| 33 | 442         |
| 34 |             |
| 35 | 0           |
| 36 | 19642       |
| 37 | 578         |
| 38 |             |
| 39 | 2246        |
| 40 |             |
| 41 | 503         |
| 42 |             |
| 43 |             |
| 44 |             |
| 45 |             |
| 46 | <b>2020</b> |
| 47 | 120792      |
| 48 | 49680       |
| 49 | 40629       |
| 50 | 52595       |
| 51 | 1793562     |
| 52 | 416638      |
| 53 | 97974       |
| 54 | 115259      |
| 55 | 198853      |
| 56 |             |
| 57 | 70145       |
| 58 |             |
| 59 |             |
| 60 |             |

For peer review only

|    |             |
|----|-------------|
| 1  |             |
| 2  | 91134       |
| 3  | 387211      |
| 4  | 393939      |
| 5  | 30755       |
| 6  | 0           |
| 7  | 54599       |
| 8  | 311946      |
| 9  | 229416      |
| 10 | 28303       |
| 11 |             |
| 12 |             |
| 13 | <b>2020</b> |
| 14 | 627476      |
| 15 | 515420      |
| 16 | 345317      |
| 17 | 412944      |
| 18 | 1302676     |
| 19 | 1461973     |
| 20 | 565458      |
| 21 | 764667      |
| 22 | 329957      |
| 23 | 632940      |
| 24 | 474811      |
| 25 | 2721395     |
| 26 | 370533      |
| 27 | 725944      |
| 28 | 0           |
| 29 | 1799338     |
| 30 | 212738      |
| 31 | 1631792     |
| 32 | 382561      |
| 33 |             |
| 34 |             |
| 35 | <b>2020</b> |
| 36 | 7261        |
| 37 | 4305        |
| 38 | 1225        |
| 39 | 3270        |
| 40 | 84910       |
| 41 | 20145       |
| 42 | 10119       |
| 43 | 9901        |
| 44 | 11215       |
| 45 |             |
| 46 |             |
| 47 |             |
| 48 |             |
| 49 |             |
| 50 |             |
| 51 |             |
| 52 |             |
| 53 |             |
| 54 |             |
| 55 |             |
| 56 |             |
| 57 |             |
| 58 |             |
| 59 |             |
| 60 |             |

For peer review only

|    |             |
|----|-------------|
| 1  |             |
| 2  | 5113        |
| 3  | 6832        |
| 4  | 25734       |
| 5  | 30329       |
| 6  | 2457        |
| 7  | 0           |
| 8  | 39248       |
| 9  | 24859       |
| 10 | 12471       |
| 11 | 2247        |
| 12 |             |
| 13 |             |
| 14 | <b>2020</b> |
| 15 | 0           |
| 16 | 3109        |
| 17 | 0           |
| 18 | 2317        |
| 19 | 491128      |
| 20 | 49014       |
| 21 | 0           |
| 22 | 5170        |
| 23 | 17215       |
| 24 | 4510        |
| 25 | 7681        |
| 26 | 16375       |
| 27 | 17155       |
| 28 | 0           |
| 29 | 0           |
| 30 | 9759        |
| 31 | 12897       |
| 32 | 42739       |
| 33 | 0           |
| 34 |             |
| 35 |             |
| 36 | <b>2020</b> |
| 37 | 10257       |
| 38 | 5268        |
| 39 | 14284       |
| 40 | 8087        |
| 41 | 698031      |
| 42 | 139249      |
| 43 | 5592        |
| 44 | 8465        |

For peer review only

|    |             |
|----|-------------|
| 1  |             |
| 2  | 7941        |
| 3  |             |
| 4  | 648         |
| 5  |             |
| 6  | 3110        |
| 7  |             |
| 8  | 32182       |
| 9  |             |
| 10 | 73893       |
| 11 |             |
| 12 | 7806        |
| 13 |             |
| 14 | 430         |
| 15 |             |
| 16 | 78939       |
| 17 |             |
| 18 | 38376       |
| 19 |             |
| 20 | 32722       |
| 21 |             |
| 22 | 5158        |
| 23 |             |
| 24 |             |
| 25 | <b>2020</b> |
| 26 | 9.23        |
| 27 |             |
| 28 | 15.79       |
| 29 |             |
| 30 | 1.44        |
| 31 |             |
| 32 | 0           |
| 33 |             |
| 34 | 64.07       |
| 35 |             |
| 36 | 98.51       |
| 37 |             |
| 38 | 126.36      |
| 39 |             |
| 40 | 7.12        |
| 41 |             |
| 42 | 29.37       |
| 43 |             |
| 44 | 24.71       |
| 45 |             |
| 46 | 44.43       |
| 47 |             |
| 48 | 57.4        |
| 49 |             |
| 50 | 11.01       |
| 51 |             |
| 52 | 14.01       |
| 53 |             |
| 54 | 0           |
| 55 |             |
| 56 | 52.11       |
| 57 |             |
| 58 | 11.04       |
| 59 |             |
| 60 | 42.67       |
|    |             |
|    | 7.88        |
|    |             |
|    |             |
|    | <b>2020</b> |
|    | 106.38      |
|    | 162.62      |
|    | 16.17       |

For peer review only

|    |             |
|----|-------------|
| 1  |             |
| 2  | 14.80       |
| 3  | 1158.87     |
| 4  | 814.60      |
| 5  | 697.7       |
| 6  | 67.03       |
| 7  | 246.06      |
| 8  | 108.73      |
| 9  | 494.20      |
| 10 | 1596.10     |
| 11 | 425.38      |
| 12 | 164.28      |
| 13 | 0           |
| 14 | 672.18      |
| 15 | 160.75      |
| 16 | 643.1       |
| 17 | 113.31      |
| 18 |             |
| 19 |             |
| 20 |             |
| 21 |             |
| 22 |             |
| 23 |             |
| 24 |             |
| 25 |             |
| 26 |             |
| 27 |             |
| 28 |             |
| 29 |             |
| 30 | <b>2020</b> |
| 31 | 23.43       |
| 32 | 75.10       |
| 33 | 5.47        |
| 34 | 17.62       |
| 35 | 206.13      |
| 36 | 165.72      |
| 37 | 57.08       |
| 38 | 26.07       |
| 39 | 7.52        |
| 40 | 30.81       |
| 41 | 13.27       |
| 42 | 218.65      |
| 43 | 59.26       |
| 44 | 154.63      |
| 45 | 0           |
| 46 | 314.98      |
| 47 | 36.61       |
| 48 | 39.57       |
| 49 | 85.16       |
| 50 |             |
| 51 |             |
| 52 |             |
| 53 |             |
| 54 |             |
| 55 |             |
| 56 |             |
| 57 |             |
| 58 |             |
| 59 |             |
| 60 | <b>2020</b> |

For peer review only



|    |             |
|----|-------------|
| 1  |             |
| 2  | 94.17       |
| 3  | 130.13      |
| 4  |             |
| 5  | 24.8        |
| 6  |             |
| 7  | 4.26        |
| 8  |             |
| 9  | 392.13      |
| 10 |             |
| 11 | 522.45      |
| 12 |             |
| 13 | 314.03      |
| 14 |             |
| 15 | 39.2        |
| 16 |             |
| 17 | 252.56      |
| 18 |             |
| 19 | 51.9        |
| 20 |             |
| 21 | 192.27      |
| 22 |             |
| 23 | 413.28      |
| 24 |             |
| 25 | 309.69      |
| 26 |             |
| 27 | 17.58       |
| 28 |             |
| 29 | 0           |
| 30 |             |
| 31 | 109.84      |
| 32 |             |
| 33 | 90.98       |
| 34 |             |
| 35 | 325.49      |
| 36 |             |
| 37 | 107.64      |
| 38 |             |
| 39 |             |
| 40 | <b>2020</b> |
| 41 |             |
| 42 | 70.44       |
| 43 |             |
| 44 | 107.01      |
| 45 |             |
| 46 | 57.31       |
| 47 |             |
| 48 | 9.31        |
| 49 |             |
| 50 | 418.03      |
| 51 |             |
| 52 | 744.63      |
| 53 |             |
| 54 | 195.31      |
| 55 |             |
| 56 | 47.61       |
| 57 |             |
| 58 | 219.24      |
| 59 |             |
| 60 | 28.72       |
|    |             |
|    | 186.50      |
|    |             |
|    | 41.74       |
|    |             |
|    | 367.60      |
|    |             |
|    | 45.29       |
|    |             |
|    | 0           |
|    |             |
|    | 506.35      |
|    |             |
|    | 13.99       |
|    |             |
|    | 87.85       |
|    |             |
|    | 49.35       |

For peer review only

|    |             |
|----|-------------|
| 1  |             |
| 2  |             |
| 3  |             |
| 4  |             |
| 5  |             |
| 6  | <b>2020</b> |
| 7  | 2857.83     |
| 8  |             |
| 9  | 3969.33     |
| 10 |             |
| 11 | 898.84      |
| 12 | 444.97      |
| 13 |             |
| 14 | 14925.08    |
| 15 | 29452.72    |
| 16 |             |
| 17 | 17044.80    |
| 18 | 2698.02     |
| 19 |             |
| 20 | 10296.89    |
| 21 | 3678.49     |
| 22 |             |
| 23 | 9321.23     |
| 24 |             |
| 25 | 30626.48    |
| 26 | 6498.71     |
| 27 | 3148.88     |
| 28 | 0           |
| 29 |             |
| 30 | 14072.72    |
| 31 | 7553.73     |
| 32 |             |
| 33 | 8974.18     |
| 34 | 2774.51     |
| 35 |             |
| 36 |             |
| 37 | <b>2020</b> |
| 38 | 14.85       |
| 39 |             |
| 40 | 41.18       |
| 41 |             |
| 42 | 7.64        |
| 43 | 3.49        |
| 44 |             |
| 45 | 108.40      |
| 46 | 103.35      |
| 47 |             |
| 48 | 98.37       |
| 49 | 17.9        |
| 50 |             |
| 51 | 17.09       |
| 52 | 33.19       |
| 53 |             |
| 54 | 48.56       |
| 55 | 215.25      |
| 56 |             |
| 57 | 61.13       |
| 58 | 74.33       |
| 59 | 0           |
| 60 | 46.38       |

For peer review only

|    |             |
|----|-------------|
| 1  |             |
| 2  | 51.51       |
| 3  |             |
| 4  | 63.83       |
| 5  |             |
| 6  | 37.5        |
| 7  |             |
| 8  | <b>2020</b> |
| 9  |             |
| 10 | 171.79      |
| 11 |             |
| 12 | 343.96      |
| 13 |             |
| 14 | 27.11       |
| 15 |             |
| 16 | 27.66       |
| 17 |             |
| 18 | 706.58      |
| 19 |             |
| 20 | 1424.04     |
| 21 |             |
| 22 | 1760.36     |
| 23 |             |
| 24 | 231.77      |
| 25 |             |
| 26 | 580.71      |
| 27 |             |
| 28 | 268.12      |
| 29 |             |
| 30 | 698.81      |
| 31 |             |
| 32 | 2035.47     |
| 33 |             |
| 34 | 500.34      |
| 35 |             |
| 36 | 251.52      |
| 37 |             |
| 38 | 0           |
| 39 |             |
| 40 | 1011.76     |
| 41 |             |
| 42 | 601.95      |
| 43 |             |
| 44 | 487.83      |
| 45 |             |
| 46 | 220.27      |
| 47 |             |
| 48 |             |
| 49 |             |
| 50 | <b>2020</b> |
| 51 |             |
| 52 | 0           |
| 53 |             |
| 54 | 248.38      |
| 55 |             |
| 56 | 0           |
| 57 |             |
| 58 | 19.61       |
| 59 |             |
| 60 | 4086.91     |
|    |             |
|    | 3464.85     |
|    |             |
|    | 0           |
|    |             |
|    | 121.03      |
|    |             |
|    | 891.43      |
|    |             |
|    | 236.51      |
|    |             |
|    | 785.66      |
|    |             |
|    | 1295.16     |
|    |             |
|    | 283.01      |
|    |             |
|    | 0           |
|    |             |
|    | 251.57      |

For peer review only

|    |             |
|----|-------------|
| 1  |             |
| 2  | 312.30      |
| 3  | 1671.84     |
| 4  |             |
| 5  | 0           |
| 6  |             |
| 7  |             |
| 8  | <b>2020</b> |
| 9  | 242.66      |
| 10 | 420.90      |
| 11 | 316.01      |
| 12 | 68.42       |
| 13 | 5808.65     |
| 14 | 9843.68     |
| 15 | 972.87      |
| 16 | 198.16      |
| 17 | 411.20      |
| 18 | 34          |
| 19 | 318.12      |
| 20 | 2545.45     |
| 21 | 1218.99     |
| 22 | 799.24      |
| 23 | 58.82       |
| 24 | 2034.94     |
| 25 | 929.28      |
| 26 | 1279.99     |
| 27 | 505.66      |
| 28 |             |
| 29 |             |
| 30 |             |
| 31 |             |
| 32 |             |
| 33 |             |
| 34 |             |
| 35 |             |
| 36 |             |
| 37 |             |
| 38 |             |
| 39 |             |
| 40 |             |
| 41 |             |
| 42 |             |
| 43 |             |
| 44 | <b>2020</b> |
| 45 | 64,990.00   |
| 46 | 65,894.00   |
| 47 | 65,310.00   |
| 48 | -           |
| 49 | 66,378.50   |
| 50 | 63,340.64   |
| 51 | 60,524.92   |
| 52 | 60,798.40   |
| 53 | 56,727.30   |
| 54 | 67,321.00   |
| 55 | 72,395.00   |
| 56 |             |
| 57 |             |
| 58 |             |
| 59 |             |
| 60 |             |

For peer review only

|    |             |
|----|-------------|
| 1  |             |
| 2  | 55,828.23   |
| 3  | 55,600.83   |
| 4  | 68,436.00   |
| 5  | -           |
| 6  | 63,169.34   |
| 7  | 65,120.57   |
| 8  | 72,716.73   |
| 9  | 80,358.00   |
| 10 |             |
| 11 |             |
| 12 |             |
| 13 |             |
| 14 |             |
| 15 | <b>2020</b> |
| 16 | 299,745.20  |
| 17 | 254,416.00  |
| 18 | 365,562.00  |
| 19 | 349,901.40  |
| 20 | 381,541.10  |
| 21 | 311,463.30  |
| 22 | 501,294.40  |
| 23 | 260,306.00  |
| 24 | 206,601.10  |
| 25 | 259,178.40  |
| 26 | 301,986.80  |
| 27 | 366,898.70  |
| 28 | 358,133.20  |
| 29 | 320,902.00  |
| 30 | -           |
| 31 | 367,256.80  |
| 32 | 255,330.70  |
| 33 | 298,942.30  |
| 34 | 288,956.20  |
| 35 |             |
| 36 |             |
| 37 |             |
| 38 |             |
| 39 |             |
| 40 |             |
| 41 |             |
| 42 |             |
| 43 |             |
| 44 |             |
| 45 |             |
| 46 |             |
| 47 |             |
| 48 |             |
| 49 |             |
| 50 | <b>2020</b> |
| 51 | 141,491.00  |
| 52 | 117,490.50  |
| 53 | 123,660.00  |
| 54 | 138,819.10  |
| 55 | 140,742.80  |
| 56 | 123,381.30  |
| 57 | 109,357.30  |
| 58 |             |
| 59 |             |
| 60 |             |

For peer review only

|    |             |
|----|-------------|
| 1  |             |
| 2  | 139,234.20  |
| 3  | 145,208.00  |
| 4  | 117,502.00  |
| 5  | 129,771.00  |
| 6  | 131,635.80  |
| 7  | 133,047.70  |
| 8  | 125,854.80  |
| 9  | -           |
| 10 | 150,847.70  |
| 11 | 137,445.50  |
| 12 | 144,524.30  |
| 13 | 144,782.30  |
| 14 |             |
| 15 |             |
| 16 | <b>2020</b> |
| 17 | 173,059.70  |
| 18 | 162,867.30  |
| 19 | 160,115.70  |
| 20 | 167,957.70  |
| 21 | 171,982.30  |
| 22 | 189,501.70  |
| 23 | 180,507.00  |
| 24 | 186,092.80  |
| 25 | 195,095.20  |
| 26 | 141,396.10  |
| 27 | 187,986.70  |
| 28 | 174,170.30  |
| 29 | 172,228.00  |
| 30 | 171,720.00  |
| 31 | -           |
| 32 | 177,536.00  |
| 33 | 208,723.60  |
| 34 | 173,347.90  |
| 35 | 219,611.00  |
| 36 |             |
| 37 |             |
| 38 | <b>2020</b> |
| 39 | 175,125.70  |
| 40 | 167,417.10  |
| 41 | 172,696.90  |
| 42 | 157,210.60  |
| 43 | 175,648.40  |
| 44 | 184,799.30  |

For peer review only

|    |            |
|----|------------|
| 1  |            |
| 2  | 187,105.50 |
| 3  | 169,482.20 |
| 4  | 211,700.00 |
| 5  | 136,915.80 |
| 6  | 151,949.50 |
| 7  | 175,913.00 |
| 8  | 172,738.90 |
| 9  | 147,440.30 |
| 10 |            |
| 11 |            |
| 12 |            |
| 13 |            |
| 14 | -          |
| 15 | 173,824.60 |
| 16 | 192,598.70 |
| 17 | 172,745.80 |
| 18 | 167,796.70 |
| 19 |            |
| 20 |            |

|    |  |
|----|--|
| 21 |  |
| 22 |  |
| 23 |  |
| 24 |  |
| 25 |  |
| 26 |  |
| 27 |  |

|    |             |
|----|-------------|
| 28 | <b>2020</b> |
| 29 | 457,545.10  |
| 30 | 451,637.40  |
| 31 | 549,043.00  |
| 32 | 531,260.10  |
| 33 | 519,120.80  |
| 34 | 591,815.60  |
| 35 | 439,343.10  |
| 36 | 498,958.80  |
| 37 | 424,900.50  |
| 38 | 394,073.30  |
| 39 | 484,753.40  |
| 40 | 450,244.80  |
| 41 | 498,026.20  |
| 42 | 512,584.80  |
| 43 | -           |
| 44 | 585,739.30  |
| 45 | 503,952.00  |
| 46 | 469,153.20  |
| 47 | 422,429.80  |
| 48 |             |
| 49 |             |
| 50 | <b>2020</b> |
| 51 | 125,495.20  |
| 52 | 103,084.00  |
| 53 |             |
| 54 |             |
| 55 |             |
| 56 |             |
| 57 |             |
| 58 |             |
| 59 |             |
| 60 |             |

For peer review only

|    |             |
|----|-------------|
| 1  |             |
| 2  | 86,329.25   |
| 3  | 137,648.00  |
| 4  | 107,653.50  |
| 5  | 112,459.50  |
| 6  | 94,243.00   |
| 7  | 76,466.70   |
| 8  | 109,985.70  |
| 9  | 90,420.00   |
| 10 | 158,270.30  |
| 11 | 108,855.80  |
| 12 | 105,865.80  |
| 13 | 90,743.00   |
| 14 |             |
| 15 | -           |
| 16 | 112,458.60  |
| 17 | 96,695.82   |
| 18 | 108,786.10  |
| 19 | 95,640.25   |
| 20 |             |
| 21 |             |
| 22 | <b>2020</b> |
| 23 | 220,026.40  |
| 24 | 215,252.90  |
| 25 | 245,092.00  |
| 26 | 204,367.60  |
| 27 | 220,545.90  |
| 28 | 287,778.60  |
| 29 | 306,622.90  |
| 30 | 230,260.90  |
| 31 | 215,666.20  |
| 32 | 189,359.10  |
| 33 | 207,036.90  |
| 34 | 238,281.30  |
| 35 | 229,768.60  |
| 36 | 272,956.00  |
| 37 |             |
| 38 | -           |
| 39 | 248,406.50  |
| 40 | 246,125.20  |
| 41 | 230,940.30  |
| 42 | 224,701.10  |
| 43 |             |
| 44 |             |
| 45 | <b>2020</b> |
| 46 | -           |
| 47 | 777,173.80  |
| 48 |             |
| 49 |             |
| 50 |             |
| 51 |             |
| 52 |             |
| 53 |             |
| 54 |             |
| 55 |             |
| 56 |             |
| 57 |             |
| 58 |             |
| 59 |             |
| 60 |             |

For peer review only



|    |              |
|----|--------------|
| 1  |              |
| 2  | 579,330.50   |
| 3  | 1,360,467.00 |
| 4  | 1,531,679.00 |
| 5  |              |
| 6  | -            |
| 7  | 517,036.80   |
| 8  | 662,129.10   |
| 9  |              |
| 10 | 751,669.50   |
| 11 | 1,280,229.00 |
| 12 | 1,091,643.00 |
| 13 | 686,218.80   |
| 14 |              |
| 15 | -            |
| 16 |              |
| 17 | -            |
| 18 |              |
| 19 | 1,084,308.00 |
| 20 | 1,172,460.00 |
| 21 | 1,473,755.00 |
| 22 |              |
| 23 | -            |
| 24 |              |
| 25 |              |
| 26 | <b>2020</b>  |
| 27 | 788,965.70   |
| 28 | 478,907.70   |
| 29 | 2,040,631.00 |
| 30 | 808,722.80   |
| 31 | 1,185,112.00 |
| 32 | 1,832,220.00 |
| 33 | 699,007.20   |
| 34 | 769,562.20   |
| 35 | 992,640.80   |
| 36 | 648,412.00   |
| 37 | 777,554.20   |
| 38 | 869,787.10   |
| 39 | 671,752.30   |
| 40 | 2,602,043.00 |
| 41 | 430,375.00   |
| 42 | 999,233.70   |
| 43 | 783,193.20   |
| 44 | 564,166.70   |
| 45 | 368,446.40   |
| 46 |              |
| 47 |              |
| 48 |              |
| 49 |              |
| 50 |              |
| 51 |              |
| 52 |              |
| 53 |              |
| 54 |              |
| 55 |              |
| 56 |              |
| 57 |              |
| 58 |              |
| 59 |              |
| 60 |              |

For peer review only

1  
2  
3  
4  
5  
6  
7  
8  
9  
10  
11  
12  
13  
14  
15  
16  
17  
18  
19  
20  
21  
22  
23  
24  
25  
26  
27  
28  
29  
30  
31  
32  
33  
34  
35  
36  
37  
38  
39  
40  
41  
42  
43  
44  
45  
46  
47  
48  
49  
50  
51  
52  
53  
54  
55  
56  
57  
58  
59  
60

For peer review only

1  
2  
3  
4  
5  
6  
7  
8  
9  
10  
11  
12  
13  
14  
15  
16  
17  
18  
19  
20  
21  
22  
23  
24  
25  
26  
27  
28  
29  
30  
31  
32  
33  
34  
35  
36  
37  
38  
39  
40  
41  
42  
43  
44  
45  
46  
47  
48  
49  
50  
51  
52  
53  
54  
55  
56  
57  
58  
59  
60

For peer review only

1  
2  
3  
4  
5  
6  
7  
8  
9  
10  
11  
12  
13  
14  
15  
16  
17  
18  
19  
20  
21  
22  
23  
24  
25  
26  
27  
28  
29  
30  
31  
32  
33  
34  
35  
36  
37  
38  
39  
40  
41  
42  
43  
44  
45  
46  
47  
48  
49  
50  
51  
52  
53  
54  
55  
56  
57  
58  
59  
60

For peer review only

1  
2  
3  
4  
5  
6  
7  
8  
9  
10  
11  
12  
13  
14  
15  
16  
17  
18  
19  
20  
21  
22  
23  
24  
25  
26  
27  
28  
29  
30  
31  
32  
33  
34  
35  
36  
37  
38  
39  
40  
41  
42  
43  
44  
45  
46  
47  
48  
49  
50  
51  
52  
53  
54  
55  
56  
57  
58  
59  
60

For peer review only

1  
2  
3  
4  
5  
6  
7  
8  
9  
10  
11  
12  
13  
14  
15  
16  
17  
18  
19  
20  
21  
22  
23  
24  
25  
26  
27  
28  
29  
30  
31  
32  
33  
34  
35  
36  
37  
38  
39  
40  
41  
42  
43  
44  
45  
46  
47  
48  
49  
50  
51  
52  
53  
54  
55  
56  
57  
58  
59  
60

For peer review only

1  
2  
3  
4  
5  
6  
7  
8  
9  
10  
11  
12  
13  
14  
15  
16  
17  
18  
19  
20  
21  
22  
23  
24  
25  
26  
27  
28  
29  
30  
31  
32  
33  
34  
35  
36  
37  
38  
39  
40  
41  
42  
43  
44  
45  
46  
47  
48  
49  
50  
51  
52  
53  
54  
55  
56  
57  
58  
59  
60

For peer review only

1  
2  
3  
4  
5  
6  
7  
8  
9  
10  
11  
12  
13  
14  
15  
16  
17  
18  
19  
20  
21  
22  
23  
24  
25  
26  
27  
28  
29  
30  
31  
32  
33  
34  
35  
36  
37  
38  
39  
40  
41  
42  
43  
44  
45  
46  
47  
48  
49  
50  
51  
52  
53  
54  
55  
56  
57  
58  
59  
60

For peer review only



1  
2  
3  
4  
5  
6  
7  
8  
9  
10  
11  
12  
13  
14  
15  
16  
17  
18  
19  
20  
21  
22  
23  
24  
25  
26  
27  
28  
29  
30  
31  
32  
33  
34  
35  
36  
37  
38  
39  
40  
41  
42  
43  
44  
45  
46  
47  
48  
49  
50  
51  
52  
53  
54  
55  
56  
57  
58  
59  
60

For peer review only

1  
2  
3  
4  
5  
6  
7  
8  
9  
10  
11  
12  
13  
14  
15  
16  
17  
18  
19  
20  
21  
22  
23  
24  
25  
26  
27  
28  
29  
30  
31  
32  
33  
34  
35  
36  
37  
38  
39  
40  
41  
42  
43  
44  
45  
46  
47  
48  
49  
50  
51  
52  
53  
54  
55  
56  
57  
58  
59  
60

For peer review only

1  
2  
3  
4  
5  
6  
7  
8  
9  
10  
11  
12  
13  
14  
15  
16  
17  
18  
19  
20  
21  
22  
23  
24  
25  
26  
27  
28  
29  
30  
31  
32  
33  
34  
35  
36  
37  
38  
39  
40  
41  
42  
43  
44  
45  
46  
47  
48  
49  
50  
51  
52  
53  
54  
55  
56  
57  
58  
59  
60

For peer review only

1  
2  
3  
4  
5  
6  
7  
8  
9  
10  
11  
12  
13  
14  
15  
16  
17  
18  
19  
20  
21  
22  
23  
24  
25  
26  
27  
28  
29  
30  
31  
32  
33  
34  
35  
36  
37  
38  
39  
40  
41  
42  
43  
44  
45  
46  
47  
48  
49  
50  
51  
52  
53  
54  
55  
56  
57  
58  
59  
60

For peer review only

## Inflation Adjusted

|                               | 1.000       | 0.982       | 0.964       |
|-------------------------------|-------------|-------------|-------------|
| <b>F32</b>                    | <b>2011</b> | <b>2012</b> | <b>2013</b> |
| Anesthesiology                | 192         | 303         | 383         |
| Dermatology                   | 173         | 219         | 150         |
| Emergency Medicine            | 59          | 53          | 60          |
| Family Medicine               | 0           | 0           | 0           |
| Internal Medicine/Medicine    | 6543        | 5699        | 5641        |
| Neurology                     | 732         | 441         | 930         |
| Neurosurgery                  | 421         | 358         | 326         |
| Obstetrics and Gynecology     | 209         | 285         | 169         |
| Ophthalmology                 | 180         | 345         | 371         |
| Orthopedics                   | 247         | 283         | 243         |
| Otolaryngology                | 527         | 377         | 342         |
| Pathology                     | 1141        | 849         | 921         |
| Pediatrics                    | 1339        | 1391        | 1202        |
| Physical Medicine & Rehab     | 51          | 51          | 0           |
| Plastic Surgery               | 0           | 0           | 0           |
| Psychiatry                    | 1921        | 1366        | 1271        |
| Radiation-Diagnostic/Oncology | 708         | 393         | 178         |
| Surgery                       | 831         | 746         | 638         |
| Urology                       | 116         | 104         | 107         |
|                               |             |             |             |
| <b>T32</b>                    |             |             |             |
| Anesthesiology                | 2305        | 2594        | 2632        |
| Dermatology                   | 2246        | 2402        | 2182        |
| Emergency Medicine            | 0           | 0           | 0           |
| Family Medicine               | 1235        | 1151        | 1474        |
| Internal Medicine/Medicine    | 115016      | 113866      | 107687      |
| Neurology                     | 9544        | 8310        | 8019        |
| Neurosurgery                  | 592         | 521         | 561         |
| Obstetrics and Gynecology     | 2392        | 2339        | 2436        |
| Ophthalmology                 | 2879        | 3118        | 4280        |
| Orthopedics                   | 1751        | 2045        | 1758        |
| Otolaryngology                | 2477        | 3279        | 2745        |
| Pathology                     | 327477      | 286708      | 253108      |
| Pediatrics                    | 24470       | 23575       | 21849       |
| Physical Medicine & Rehab     | 1431        | 1049        | 1053        |
| Plastic Surgery               | 0           | 0           | 0           |
| Psychiatry                    | 20056       | 20292       | 19598       |
| Radiation-Diagnostic/Oncology | 5579        | 4021        | 4485        |

|         |       |       |       |
|---------|-------|-------|-------|
| Surgery | 12609 | 12052 | 10852 |
| Urology | 1084  | 1202  | 1110  |

### Inflation Adjusted

| <b>K01</b>                    | <b>2011</b> | <b>2012</b> | <b>2013</b> |
|-------------------------------|-------------|-------------|-------------|
| Anesthesiology                | 480         | 476         | 446         |
| Dermatology                   | 375         | 459         | 575         |
| Emergency Medicine            | 0           | 134         | 129         |
| Family Medicine               | 1241        | 1533        | 1140        |
| Internal Medicine/Medicine    | 16576       | 15116       | 15055       |
| Neurology                     | 1619        | 1780        | 2231        |
| Neurosurgery                  | 298         | 237         | 122         |
| Obstetrics and Gynecology     | 279         | 168         | 302         |
| Ophthalmology                 | 0           | 0           | 0           |
| Orthopedics                   | 618         | 464         | 779         |
| Otolaryngology                | 274         | 269         | 264         |
| Pathology                     | 1538        | 1606        | 1637        |
| Pediatrics                    | 2485        | 2102        | 2204        |
| Physical Medicine & Rehab     | 344         | 358         | 472         |
| Plastic Surgery               | 0           | 0           | 0           |
| Psychiatry                    | 12041       | 11933       | 10648       |
| Radiation-Diagnostic/Oncology | 2091        | 1926        | 1463        |
| Surgery                       | 999         | 846         | 1196        |
| Urology                       | 106         | 104         | 102         |
|                               |             |             |             |
| <b>K08</b>                    | <b>2011</b> | <b>2012</b> | <b>2013</b> |
| Anesthesiology                | 1636        | 1798        | 1997        |
| Dermatology                   | 2225        | 2268        | 1869        |
| Emergency Medicine            | 283         | 558         | 844         |
| Family Medicine               | 611         | 605         | 654         |
| Internal Medicine/Medicine    | 37528       | 35693       | 32091       |
| Neurology                     | 6333        | 5678        | 6353        |
| Neurosurgery                  | 1160        | 1175        | 1394        |
| Obstetrics and Gynecology     | 1072        | 1058        | 918         |
| Ophthalmology                 | 4904        | 4972        | 5146        |
| Orthopedics                   | 179         | 264         | 500         |
| Otolaryngology                | 1995        | 2150        | 2046        |
| Pathology                     | 4861        | 4209        | 4409        |
| Pediatrics                    | 15014       | 12982       | 12498       |

|                               |             |             |             |
|-------------------------------|-------------|-------------|-------------|
| Physical Medicine & Rehab     | 125         | 123         | 121         |
| Plastic Surgery               | 0           | 0           | 0           |
| Psychiatry                    | 5684        | 4933        | 3170        |
| Radiation-Diagnostic/Oncology | 811         | 805         | 791         |
| Surgery                       | 7904        | 7900        | 6433        |
| Urology                       | 1217        | 1175        | 1341        |
|                               |             |             |             |
| <b>K23</b>                    | <b>2011</b> | <b>2012</b> | <b>2013</b> |
| Anesthesiology                | 1200        | 1530        | 1773        |
| Dermatology                   | 368         | 482         | 243         |
| Emergency Medicine            | 2344        | 2073        | 2229        |
| Family Medicine               | 1388        | 1233        | 869         |
| Internal Medicine/Medicine    | 44386       | 45346       | 44041       |
| Neurology                     | 8996        | 8800        | 7501        |
| Neurosurgery                  | 372         | 699         | 889         |
| Obstetrics and Gynecology     | 1602        | 1774        | 1338        |
| Ophthalmology                 | 2853        | 2305        | 2550        |
| Orthopedics                   | 337         | 384         | 309         |
| Otolaryngology                | 1485        | 1229        | 1191        |
| Pathology                     | 517         | 393         | 256         |
| Pediatrics                    | 12950       | 12514       | 11862       |
| Physical Medicine & Rehab     | 994         | 926         | 1457        |
| Plastic Surgery               | 0           | 0           | 0           |
| Psychiatry                    | 19068       | 17876       | 16241       |
| Radiation-Diagnostic/Oncology | 952         | 647         | 609         |
| Surgery                       | 1704        | 1641        | 1426        |
| Urology                       | 314         | 151         | 286         |

### Inflation Adjusted

| <b>R01</b>                 | <b>2011</b> | <b>2012</b> | <b>2013</b> |
|----------------------------|-------------|-------------|-------------|
| Anesthesiology             | 74515       | 82822       | 78723       |
| Dermatology                | 39821       | 43092       | 40069       |
| Emergency Medicine         | 12119       | 12671       | 13310       |
| Family Medicine            | 37541       | 40753       | 35625       |
| Internal Medicine/Medicine | 1291238     | 1229358     | 1109245     |
| Neurology                  | 213323      | 218006      | 205876      |
| Neurosurgery               | 48188       | 50017       | 45222       |
| Obstetrics and Gynecology  | 50170       | 46185       | 46206       |
| Ophthalmology              | 143557      | 144104      | 138351      |
| Orthopedics                | 37635       | 40036       | 42487       |

|                               |             |             |             |
|-------------------------------|-------------|-------------|-------------|
| Otolaryngology                | 51992       | 54810       | 54299       |
| Pathology                     | 324176      | 312674      | 284081      |
| Pediatrics                    | 312475      | 330131      | 300476      |
| Physical Medicine & Rehab     | 11247       | 12841       | 12732       |
| Plastic Surgery               | 967         | 0           | 518         |
| Psychiatry                    | 470253      | 451087      | 391576      |
| Radiation-Diagnostic/Oncology | 205633      | 204652      | 195518      |
| Surgery                       | 146686      | 137678      | 122878      |
| Urology                       | 24013       | 24651       | 24129       |
|                               |             |             |             |
| <b>R03</b>                    | <b>2011</b> | <b>2012</b> | <b>2013</b> |
| Anesthesiology                | 450081      | 708133      | 427169      |
| Dermatology                   | 325896      | 408514      | 145727      |
| Emergency Medicine            | 63905       | 84790       | 66196       |
| Family Medicine               | 736834      | 706646      | 815519      |
| Internal Medicine/Medicine    | 9494800     | 11350077    | 10318182    |
| Neurology                     | 96465       | 645070      | 825360      |
| Neurosurgery                  | 39134       | 766691      | 740507      |
| Obstetrics and Gynecology     | 600862      | 848707      | 737169      |
| Ophthalmology                 | 0           | 0           | 0           |
| Orthopedics                   | 816678      | 773215      | 845592      |
| Otolaryngology                | 1718440     | 2231507     | 2294913     |
| Pathology                     | 1925448     | 1557790     | 1386485     |
| Pediatrics                    | 2921374     | 2370262     | 2603315     |
| Physical Medicine & Rehab     | 672323      | 534487      | 444946      |
| Plastic Surgery               | 0           | 0           | 0           |
| Psychiatry                    | 2652569     | 2662850     | 2553215     |
| Radiation-Diagnostic/Oncology | 783679      | 508691      | 716250      |
| Surgery                       | 1364197     | 1707792     | 1328538     |
| Urology                       | 78000       | 236296      | 147984      |
|                               |             |             |             |
| <b>R21</b>                    | <b>2011</b> | <b>2012</b> | <b>2013</b> |
| Anesthesiology                | 5363        | 4870        | 5414        |
| Dermatology                   | 3480        | 3808        | 3574        |
| Emergency Medicine            | 1418        | 1216        | 653         |
| Family Medicine               | 2736        | 3279        | 3394        |
| Internal Medicine/Medicine    | 77517       | 80724       | 73759       |
| Neurology                     | 12904       | 15438       | 14164       |
| Neurosurgery                  | 2414        | 3654        | 4277        |
| Obstetrics and Gynecology     | 6800        | 5183        | 5530        |
| Ophthalmology                 | 3884        | 3791        | 5654        |



|    |                               |             |             |             |
|----|-------------------------------|-------------|-------------|-------------|
| 1  |                               |             |             |             |
| 2  | Orthopedics                   | 2763        | 3554        | 3273        |
| 3  | Otolaryngology                | 2673        | 3184        | 4448        |
| 4  | Pathology                     | 24267       | 20933       | 21656       |
| 5  | Pediatrics                    | 19943       | 19077       | 19113       |
| 6  | Physical Medicine & Rehab     | 781         | 1404        | 2107        |
| 7  | Plastic Surgery               | 0           | 0           | 0           |
| 8  | Psychiatry                    | 25223       | 34234       | 36895       |
| 9  | Radiation-Diagnostic/Oncology | 20438       | 21387       | 19548       |
| 10 | Surgery                       | 11149       | 10470       | 8623        |
| 11 | Urology                       | 1626        | 1699        | 808         |
| 12 |                               |             |             |             |
| 13 |                               |             |             |             |
| 14 |                               |             |             |             |
| 15 |                               |             |             |             |
| 16 |                               |             |             |             |
| 17 |                               |             |             |             |
| 18 | <b>P30</b>                    | <b>2011</b> | <b>2012</b> | <b>2013</b> |
| 19 | Anesthesiology                | 0           | 0           | 0           |
| 20 | Dermatology                   | 5597        | 4257        | 5840        |
| 21 | Emergency Medicine            | 0           | 0           | 0           |
| 22 | Family Medicine               | 0           | 471         | 456         |
| 23 | Internal Medicine/Medicine    | 296235      | 314695      | 327378      |
| 24 | Neurology                     | 13644       | 14792       | 13499       |
| 25 | Neurosurgery                  | 1890        | 2603        | 2412        |
| 26 | Obstetrics and Gynecology     | 5801        | 5697        | 4974        |
| 27 | Ophthalmology                 | 18749       | 21221       | 16996       |
| 28 | Orthopedics                   | 2502        | 2465        | 2306        |
| 29 | Otolaryngology                | 4978        | 4745        | 4438        |
| 30 | Pathology                     | 24994       | 16923       | 35011       |
| 31 | Pediatrics                    | 26289       | 22806       | 21451       |
| 32 | Physical Medicine & Rehab     | 0           | 0           | 0           |
| 33 | Plastic Surgery               | 0           | 0           | 0           |
| 34 | Psychiatry                    | 17668       | 16851       | 18824       |
| 35 | Radiation-Diagnostic/Oncology | 2851        | 3718        | 4139        |
| 36 | Surgery                       | 25238       | 21098       | 23432       |
| 37 | Urology                       | 4835        | 4641        | 3800        |
| 38 |                               |             |             |             |
| 39 |                               |             |             |             |
| 40 |                               |             |             |             |
| 41 |                               |             |             |             |
| 42 |                               |             |             |             |
| 43 |                               |             |             |             |
| 44 |                               |             |             |             |
| 45 |                               |             |             |             |
| 46 |                               |             |             |             |
| 47 |                               |             |             |             |
| 48 |                               |             |             |             |
| 49 | <b>U01</b>                    | <b>2011</b> | <b>2012</b> | <b>2013</b> |
| 50 | Anesthesiology                | 3304        | 3100        | 3391        |
| 51 | Dermatology                   | 810         | 2461        | 2370        |
| 52 | Emergency Medicine            | 18243       | 16572       | 7912        |
| 53 | Family Medicine               | 5269        | 8064        | 8594        |
| 54 | Internal Medicine/Medicine    | 394866      | 37781       | 41240       |
| 55 | Neurology                     | 61745       | 67582       | 68966       |
| 56 | Neurosurgery                  | 4610        | 4511        | 15097       |
| 57 | Obstetrics and Gynecology     | 25401       | 16745       | 5030        |

|                               |       |       |       |
|-------------------------------|-------|-------|-------|
| Ophthalmology                 | 2346  | 2406  | 1868  |
| Orthopedics                   | 0     | 0     | 503   |
| Otolaryngology                | 1413  | 815   | 1101  |
| Pathology                     | 45262 | 29147 | 26251 |
| Pediatrics                    | 98053 | 97561 | 87854 |
| Physical Medicine & Rehab     | 569   | 611   | 3664  |
| Plastic Surgery               | 0     | 0     | 0     |
| Psychiatry                    | 41548 | 57671 | 51564 |
| Radiation-Diagnostic/Oncology | 6629  | 8442  | 13378 |
| Surgery                       | 29433 | 38495 | 37429 |
| Urology                       | 13453 | 11139 | 11389 |

### Inflation Adjusted

| <b>F32</b>                    | <b>2011</b> | <b>2012</b> | <b>2013</b> |
|-------------------------------|-------------|-------------|-------------|
| Anesthesiology                | 4.78        | 7.50        | 9.39        |
| Dermatology                   | 16.02       | 19.75       | 13.20       |
| Emergency Medicine            | 1.74        | 1.49        | 1.61        |
| Family Medicine               | 0.00        | 0.00        | 0.00        |
| Internal Medicine/Medicine    | 60.00       | 51.78       | 50.80       |
| Neurology                     | 56.70       | 33.79       | 71.09       |
| Neurosurgery                  | 83.50       | 70.23       | 63.10       |
| Obstetrics and Gynecology     | 5.19        | 7.02        | 4.14        |
| Ophthalmology                 | 10.05       | 19.00       | 20.27       |
| Orthopedics                   | 12.45       | 14.46       | 12.55       |
| Otolaryngology                | 57.13       | 40.65       | 36.71       |
| Pathology                     | 76.21       | 59.23       | 67.18       |
| Pediatrics                    | 24.12       | 24.87       | 21.36       |
| Physical Medicine & Rehab     | 6.04        | 5.84        | 0.00        |
| Plastic Surgery               | 0.00        | 0.00        | 0.00        |
| Psychiatry                    | 50.17       | 36.16       | 34.08       |
| Radiation-Diagnostic/Oncology | 21.82       | 11.18       | 4.73        |
| Surgery                       | 31.58       | 28.98       | 25.34       |
| Urology                       | 11.85       | 10.64       | 10.98       |
|                               |             |             |             |
| <b>T32</b>                    | <b>2011</b> | <b>2012</b> | <b>2013</b> |
| Anesthesiology                | 57.45       | 64.14       | 64.57       |
| Dermatology                   | 207.61      | 216.57      | 192.02      |
| Emergency Medicine            | 0.00        | 0.00        | 0.00        |

|                               |         |         |         |
|-------------------------------|---------|---------|---------|
| Family Medicine               | 11.59   | 10.68   | 13.53   |
| Internal Medicine/Medicine    | 1054.73 | 1034.69 | 97.00   |
| Neurology                     | 738.92  | 637.44  | 609.48  |
| Neurosurgery                  | 117.21  | 102.16  | 108.51  |
| Obstetrics and Gynecology     | 59.25   | 57.63   | 59.66   |
| Ophthalmology                 | 160.46  | 171.97  | 233.63  |
| Orthopedics                   | 88.32   | 104.32  | 90.76   |
| Otolaryngology                | 268.30  | 353.51  | 294.55  |
| Pathology                     | 2186.81 | 1998.99 | 1846.12 |
| Pediatrics                    | 440.82  | 421.84  | 388.35  |
| Physical Medicine & Rehab     | 168.31  | 120.48  | 118.23  |
| Plastic Surgery               | 0.00    | 0.00    | 0.00    |
| Psychiatry                    | 523.79  | 536.91  | 525.48  |
| Radiation-Diagnostic/Oncology | 171.95  | 114.57  | 118.83  |
| Surgery                       | 479.19  | 468.04  | 430.85  |
| Urology                       | 110.36  | 122.63  | 113.62  |

### Inflation Adjusted

| <b>K01</b>                    | <b>2011</b> | <b>2012</b> | <b>2013</b> |
|-------------------------------|-------------|-------------|-------------|
| Anesthesiology                | 11.97       | 11.76       | 10.95       |
| Dermatology                   | 34.67       | 41.34       | 50.58       |
| Emergency Medicine            | 0           | 3.76        | 3.47        |
| Family Medicine               | 11.65       | 14.23       | 10.46       |
| Internal Medicine/Medicine    | 152.01      | 137.37      | 135.58      |
| Neurology                     | 125.34      | 136.57      | 169.53      |
| Neurosurgery                  | 59.06       | 46.33       | 23.62       |
| Obstetrics and Gynecology     | 6.92        | 4.13        | 7.39        |
| Ophthalmology                 | 0           | 0.00        | 0.00        |
| Orthopedics                   | 31.17       | 23.64       | 40.24       |
| Otolaryngology                | 29.72       | 29.05       | 28.39       |
| Pathology                     | 102.72      | 111.95      | 119.41      |
| Pediatrics                    | 44.76       | 37.61       | 39.16       |
| Physical Medicine & Rehab     | 40.44       | 41.23       | 52.99       |
| Plastic Surgery               | 0           | 0.00        | 0.00        |
| Psychiatry                    | 314.48      | 315.73      | 285.49      |
| Radiation-Diagnostic/Oncology | 64.43       | 54.86       | 38.77       |
| Surgery                       | 37.96       | 32.83       | 47.48       |
| Urology                       | 10.77       | 10.61       | 10.44       |
| <b>K08</b>                    | <b>2011</b> | <b>2012</b> | <b>2013</b> |

|    |                               |             |             |             |
|----|-------------------------------|-------------|-------------|-------------|
| 1  |                               |             |             |             |
| 2  | Anesthesiology                | 40.78       | 44.46       | 49.01       |
| 3  | Dermatology                   | 205.68      | 204.39      | 164.46      |
| 4  | Emergency Medicine            | 8.33        | 15.66       | 22.66       |
| 5  | Family Medicine               | 5.73        | 5.62        | 6.00        |
| 6  | Internal Medicine/Medicine    | 344.14      | 324.34      | 288.99      |
| 7  | Neurology                     | 490.32      | 435.54      | 482.87      |
| 8  | Neurosurgery                  | 229.79      | 230.00      | 269.66      |
| 9  | Obstetrics and Gynecology     | 26.56       | 26.04       | 22.50       |
| 10 | Ophthalmology                 | 273.33      | 274.26      | 280.95      |
| 11 | Orthopedics                   | 9.04        | 13.46       | 25.83       |
| 12 | Otolaryngology                | 216.07      | 231.75      | 219.56      |
| 13 | Pathology                     | 324.6       | 293.49      | 321.59      |
| 14 | Pediatrics                    | 270.48      | 232.31      | 222.14      |
| 15 | Physical Medicine & Rehab     | 14.69       | 14.09       | 13.53       |
| 16 | Plastic Surgery               | 0           | 0.00        | 0.00        |
| 17 | Psychiatry                    | 148.44      | 130.51      | 84.99       |
| 18 | Radiation-Diagnostic/Oncology | 25.01       | 22.94       | 20.95       |
| 19 | Surgery                       | 300.38      | 306.80      | 255.40      |
| 20 | Urology                       | 123.84      | 120.00      | 137.26      |
| 21 |                               |             |             |             |
| 22 |                               |             |             |             |
| 23 |                               |             |             |             |
| 24 |                               |             |             |             |
| 25 |                               |             |             |             |
| 26 |                               |             |             |             |
| 27 |                               |             |             |             |
| 28 |                               |             |             |             |
| 29 |                               |             |             |             |
| 30 |                               |             |             |             |
| 31 |                               |             |             |             |
| 32 | <b>K23</b>                    | <b>2011</b> | <b>2012</b> | <b>2013</b> |
| 33 | Anesthesiology                | 29.91       | 37.84       | 43.51       |
| 34 | Dermatology                   | 33.98       | 43.44       | 21.39       |
| 35 | Emergency Medicine            | 68.98       | 58.21       | 59.85       |
| 36 | Family Medicine               | 13.02       | 11.45       | 7.98        |
| 37 | Internal Medicine/Medicine    | 407.03      | 412.06      | 396.60      |
| 38 | Neurology                     | 696.5       | 675.02      | 570.16      |
| 39 | Neurosurgery                  | 73.7        | 136.85      | 172.01      |
| 40 | Obstetrics and Gynecology     | 39.68       | 43.69       | 32.77       |
| 41 | Ophthalmology                 | 159.02      | 127.12      | 139.19      |
| 42 | Orthopedics                   | 17.02       | 19.58       | 15.94       |
| 43 | Otolaryngology                | 160.86      | 132.50      | 127.77      |
| 44 | Pathology                     | 34.49       | 27.41       | 18.62       |
| 45 | Pediatrics                    | 233.29      | 223.92      | 210.84      |
| 46 | Physical Medicine & Rehab     | 116.92      | 106.36      | 163.63      |
| 47 | Plastic Surgery               | 0           | 0.00        | 0.00        |
| 48 | Psychiatry                    | 498         | 473.00      | 435.45      |
| 49 | Radiation-Diagnostic/Oncology | 29.33       | 18.44       | 16.13       |
| 50 | Surgery                       | 64.76       | 63.71       | 56.65       |
| 51 | Urology                       | 31.99       | 15.43       | 29.31       |
| 52 |                               |             |             |             |
| 53 |                               |             |             |             |
| 54 |                               |             |             |             |
| 55 |                               |             |             |             |
| 56 |                               |             |             |             |
| 57 |                               |             |             |             |
| 58 |                               |             |             |             |
| 59 |                               |             |             |             |
| 60 |                               |             |             |             |

**Inflation Adjusted**

| <b>R01</b>                    | <b>2011</b> | <b>2012</b> | <b>2013</b> |
|-------------------------------|-------------|-------------|-------------|
| Anesthesiology                | 1857.17     | 2047.99     | 1931.48     |
| Dermatology                   | 3680.31     | 3885.13     | 3526.22     |
| Emergency Medicine            | 356.59      | 355.81      | 357.40      |
| Family Medicine               | 352.34      | 378.28      | 327.08      |
| Internal Medicine/Medicine    | 11841.01    | 11171.16    | 9988.96     |
| Neurology                     | 16516.17    | 16723.43    | 15648.83    |
| Neurosurgery                  | 9547.89     | 9789.90     | 8745.41     |
| Obstetrics and Gynecology     | 1242.54     | 1137.52     | 1131.77     |
| Ophthalmology                 | 8000.73     | 7948.37     | 7553.12     |
| Orthopedics                   | 1898.66     | 2042.87     | 2193.01     |
| Otolaryngology                | 5631.72     | 5908.82     | 5826.16     |
| Pathology                     | 21647.85    | 21800.50    | 20720.71    |
| Pediatrics                    | 5629.26     | 5907.28     | 5340.64     |
| Physical Medicine & Rehab     | 1322.77     | 1475.20     | 1429.65     |
| Plastic Surgery               | 141.77      | 0.00        | 74.65       |
| Psychiatry                    | 12281.68    | 11935.88    | 10499.14    |
| Radiation-Diagnostic/Oncology | 6337.9      | 5830.94     | 5179.30     |
| Surgery                       | 5574.43     | 5346.64     | 4878.63     |
| Urology                       | 2443.77     | 2515.79     | 2469.45     |
|                               |             |             |             |
| <b>R03</b>                    | <b>2011</b> | <b>2012</b> | <b>2013</b> |
| Anesthesiology                | 11.22       | 17.51       | 10.48       |
| Dermatology                   | 30.12       | 36.84       | 12.83       |
| Emergency Medicine            | 1.88        | 2.38        | 1.77        |
| Family Medicine               | 6.92        | 6.56        | 7.48        |
| Internal Medicine/Medicine    | 87.07       | 103.14      | 92.91       |
| Neurology                     | 74.68       | 49.48       | 62.74       |
| Neurosurgery                  | 77.53       | 150.06      | 143.21      |
| Obstetrics and Gynecology     | 14.88       | 20.91       | 18.05       |
| Ophthalmology                 | 0           | 0.00        | 0.00        |
| Orthopedics                   | 41.2        | 39.46       | 43.65       |
| Otolaryngology                | 186.14      | 240.57      | 246.24      |
| Pathology                     | 128.58      | 108.61      | 101.13      |
| Pediatrics                    | 52.63       | 42.41       | 46.27       |
| Physical Medicine & Rehab     | 79.07       | 61.41       | 49.96       |
| Plastic Surgery               | 0           | 0.00        | 0.00        |
| Psychiatry                    | 69.28       | 70.46       | 68.46       |

|    |                               |             |             |             |
|----|-------------------------------|-------------|-------------|-------------|
| 1  |                               |             |             |             |
| 2  | Radiation-Diagnostic/Oncology | 24.15       | 14.49       | 18.97       |
| 3  | Surgery                       | 51.84       | 66.32       | 52.75       |
| 4  | Urology                       | 7.94        | 24.12       | 15.15       |
| 5  |                               |             |             |             |
| 6  |                               |             |             |             |
| 7  |                               |             |             |             |
| 8  | <b>R21</b>                    | <b>2011</b> | <b>2012</b> | <b>2013</b> |
| 9  | Anesthesiology                | 133.66      | 120.44      | 132.83      |
| 10 | Dermatology                   | 321.61      | 343.39      | 314.52      |
| 11 | Emergency Medicine            | 41.72       | 34.15       | 17.53       |
| 12 | Family Medicine               | 25.67       | 30.43       | 31.16       |
| 13 | Internal Medicine/Medicine    | 710.85      | 733.54      | 664.21      |
| 14 | Neurology                     | 999.05      | 1184.29     | 1076.63     |
| 15 | Neurosurgery                  | 478.39      | 715.27      | 827.13      |
| 16 | Obstetrics and Gynecology     | 168.4       | 127.65      | 135.43      |
| 17 | Ophthalmology                 | 216.49      | 209.07      | 308.65      |
| 18 | Orthopedics                   | 139.37      | 181.35      | 168.92      |
| 19 | Otolaryngology                | 289.56      | 343.22      | 477.17      |
| 20 | Pathology                     | 1620.52     | 1459.48     | 1579.63     |
| 21 | Pediatrics                    | 359.27      | 341.35      | 339.71      |
| 22 | Physical Medicine & Rehab     | 91.84       | 161.33      | 236.54      |
| 23 | Plastic Surgery               | 0           | 0.00        | 0.00        |
| 24 | Psychiatry                    | 658.75      | 905.85      | 989.24      |
| 25 | Radiation-Diagnostic/Oncology | 629.93      | 609.35      | 517.83      |
| 26 | Surgery                       | 423.69      | 406.62      | 342.36      |
| 27 | Urology                       | 165.44      | 173.35      | 82.71       |
| 28 |                               |             |             |             |
| 29 |                               |             |             |             |
| 30 |                               |             |             |             |
| 31 |                               |             |             |             |
| 32 |                               |             |             |             |
| 33 |                               |             |             |             |
| 34 |                               |             |             |             |
| 35 |                               |             |             |             |
| 36 |                               |             |             |             |
| 37 |                               |             |             |             |
| 38 |                               |             |             |             |
| 39 | <b>P30</b>                    | <b>2011</b> | <b>2012</b> | <b>2013</b> |
| 40 | Anesthesiology                | 0           | 0.00        | 0.00        |
| 41 | Dermatology                   | 517.27      | 383.83      | 513.97      |
| 42 | Emergency Medicine            | 0           | 0.00        | 0.00        |
| 43 | Family Medicine               | 0           | 4.38        | 4.19        |
| 44 | Internal Medicine/Medicine    | 2716.56     | 2859.64     | 2948.10     |
| 45 | Neurology                     | 1056.37     | 1134.75     | 1026.00     |
| 46 | Neurosurgery                  | 374.49      | 509.63      | 466.42      |
| 47 | Obstetrics and Gynecology     | 143.68      | 140.31      | 121.84      |
| 48 | Ophthalmology                 | 1044.94     | 1170.49     | 927.85      |
| 49 | Orthopedics                   | 126.2       | 125.76      | 119.00      |
| 50 | Otolaryngology                | 539.17      | 511.56      | 476.12      |
| 51 | Pathology                     | 1669.05     | 1179.93     | 2553.67     |
| 52 | Pediatrics                    | 473.59      | 408.08      | 381.26      |
| 53 | Physical Medicine & Rehab     | 0           | 0.00        | 0.00        |
| 54 | Psychiatry                    | 461.43      | 445.88      | 504.71      |

|                               |             |             |             |
|-------------------------------|-------------|-------------|-------------|
| Radiation-Diagnostic/Oncology | 87.87       | 105.93      | 109.64      |
| Surgery                       | 959.11      | 819.33      | 930.32      |
| Urology                       | 492.04      | 473.70      | 388.96      |
|                               |             |             |             |
| <b>U01</b>                    | <b>2011</b> | <b>2012</b> | <b>2013</b> |
| Anesthesiology                | 82.34       | 76.68       | 83.19       |
| Dermatology                   | 74.83       | 221.89      | 208.60      |
| Emergency Medicine            | 536.81      | 465.33      | 212.46      |
| Family Medicine               | 49.45       | 74.86       | 78.90       |
| Internal Medicine/Medicine    | 3621.03     | 3432.95     | 3713.38     |
| Neurology                     | 4780.51     | 5184.24     | 5242.20     |
| Neurosurgery                  | 913.42      | 883.13      | 2919.54     |
| Obstetrics and Gynecology     | 629.11      | 412.41      | 123.20      |
| Ophthalmology                 | 130.77      | 132.73      | 101.99      |
| Orthopedics                   | 0           | 0.00        | 25.96       |
| Otolaryngology                | 153.02      | 87.87       | 118.13      |
| Pathology                     | 3022.5      | 2032.21     | 1914.78     |
| Pediatrics                    | 1766.44     | 1745.73     | 1561.52     |
| Physical Medicine & Rehab     | 66.88       | 70.22       | 411.32      |
| Plastic Surgery               | 0           | 0.00        | 0.00        |
| Psychiatry                    | 1085.13     | 1525.97     | 1382.55     |
| Radiation-Diagnostic/Oncology | 204.33      | 240.56      | 354.41      |
| Surgery                       | 1118.53     | 1494.90     | 1486.05     |
| Urology                       | 1369.09     | 1136.85     | 1165.61     |

### Inflation Adjusted

| <b>F32</b>                 | <b>2011</b> | <b>2012</b> | <b>2013</b> |
|----------------------------|-------------|-------------|-------------|
| Anesthesiology             | 47,914.25   | 50,564.63   | 47,863.62   |
| Dermatology                | 43,343.50   | 54,752.00   | 50,008.73   |
| Emergency Medicine         | 59,234.00   | 53,061.93   | 60,015.10   |
| Family Medicine            | -           | -           | -           |
| Internal Medicine/Medicine | 51,926.46   | 50,880.02   | 48,631.79   |
| Neurology                  | 48,824.33   | 44,054.28   | 46,479.50   |
| Neurosurgery               | 52,676.12   | 44,855.37   | 40,785.68   |
| Obstetrics and Gynecology  | 52,343.00   | 47,498.74   | 42,226.54   |
| Ophthalmology              | 45,094.75   | 49,222.90   | 53,046.74   |
| Orthopedics                | 49,338.00   | 47,211.67   | 48,595.90   |
| Otolaryngology             | 52,747.00   | 53,858.07   | 48,874.70   |



|    |                                |             |             |             |
|----|--------------------------------|-------------|-------------|-------------|
| 1  |                                |             |             |             |
| 2  | Pathology                      | 51,873.14   | 49,971.73   | 41,865.24   |
| 3  | Pediatrics                     | 53,559.40   | 51,485.01   | 50,077.80   |
| 4  | Physical Medicine & Rehab      | 51,326.00   | 50,889.69   | -           |
| 5  | Plastic Surgery                | -           | -           | -           |
| 6  | Psychiatry                     | 49,255.31   | 47,118.30   | 45,390.28   |
| 7  | Radiation-Diagnostic/Oncology  | 50,566.64   | 49,042.98   | 35,719.95   |
| 8  | Surgery                        | 48,888.53   | 49,755.77   | 49,105.68   |
| 9  | Urology                        | 58,202.00   | 52,112.31   | 53,685.14   |
| 10 |                                |             |             |             |
| 11 |                                |             |             |             |
| 12 |                                |             |             |             |
| 13 |                                |             |             |             |
| 14 |                                |             |             |             |
| 15 | <b>T32</b>                     | <b>2011</b> | <b>2012</b> | <b>2013</b> |
| 16 | Anesthesiology                 | 177,313.40  | 172,900.71  | 187,991.91  |
| 17 | Dermatology                    | 187,196.80  | 200,172.91  | 181,826.65  |
| 18 | Emergency Medicine             | -           | -           | -           |
| 19 | Family Medicine                | 246,991.00  | 287,635.09  | 245,653.91  |
| 20 | Internal Medicine/ Medicine    | 301,089.20  | 292,714.24  | 301,642.87  |
| 21 | Neurology                      | 257,944.60  | 244,402.87  | 250,571.40  |
| 22 | Neurosurgery                   | 197,192.30  | 173,976.81  | 187,025.53  |
| 23 | Obstetrics and Gynecology      | 199,358.80  | 212,687.88  | 202,995.97  |
| 24 | Ophthalmology                  | 191,942.20  | 194,862.69  | 203,785.00  |
| 25 | Orthopedics                    | 218,841.90  | 227,166.80  | 219,800.47  |
| 26 | Otolaryngology                 | 206,410.50  | 273,267.23  | 249,563.75  |
| 27 | Pathology                      | 380,784.30  | 382,272.67  | 361,577.45  |
| 28 | Pediatrics                     | 226,569.60  | 238,129.18  | 242,773.41  |
| 29 | Physical Medicine & Rehab      | 159,013.20  | 262,160.50  | 263,242.32  |
| 30 | Plastic Surgery                | -           | -           | -           |
| 31 | Psychiatry                     | 260,461.80  | 256,851.85  | 244,979.25  |
| 32 | Radiation-Diagnostic/ Oncology | 253,584.50  | 201,064.39  | 203,889.82  |
| 33 | Surgery                        | 233,508.00  | 215,221.80  | 200,957.92  |
| 34 | Urology                        | 154,911.30  | 150,199.16  | 158,600.09  |
| 35 |                                |             |             |             |
| 36 |                                |             |             |             |
| 37 |                                |             |             |             |
| 38 |                                |             |             |             |
| 39 |                                |             |             |             |
| 40 |                                |             |             |             |
| 41 |                                |             |             |             |
| 42 |                                |             |             |             |
| 43 |                                |             |             |             |
| 44 |                                |             |             |             |
| 45 |                                |             |             |             |
| 46 |                                |             |             |             |
| 47 |                                |             |             |             |
| 48 |                                |             |             |             |
| 49 |                                |             |             |             |

### Inflation Adjusted

|    |                             |             |             |             |
|----|-----------------------------|-------------|-------------|-------------|
| 50 | <b>K01</b>                  | <b>2011</b> | <b>2012</b> | <b>2013</b> |
| 51 | Anesthesiology              | 120,086.20  | 118,974.20  | 111,660.46  |
| 52 | Dermatology                 | 93,785.25   | 114,634.32  | 95,788.48   |
| 53 | Emergency Medicine          | -           | 133,854.38  | 129,237.78  |
| 54 | Family Medicine             | 112,845.90  | 117,894.26  | 113,944.60  |
| 55 | Internal Medicine/ Medicine | 127,509.60  | 120,933.83  | 119,485.74  |
| 56 | Neurology                   | 134,905.80  | 136,948.55  | 139,394.75  |
| 57 | Neurosurgery                | 99,353.33   | 78,903.02   | 122,128.62  |
| 58 |                             |             |             |             |
| 59 |                             |             |             |             |
| 60 |                             |             |             |             |



|    |                                |             |             |             |
|----|--------------------------------|-------------|-------------|-------------|
| 1  |                                |             |             |             |
| 2  | Obstetrics and Gynecology      | 139,635.50  | 167,952.36  | 150,802.00  |
| 3  | Ophthalmology                  | -           | -           | -           |
| 4  | Orthopedics                    | 123,579.60  | 115,818.94  | 111,376.84  |
| 5  | Otolaryngology                 | 137,182.00  | 134,716.60  | 132,296.69  |
| 6  | Pathology                      | 118,330.60  | 114,687.74  | 109,133.87  |
| 7  | Pediatrics                     | 124,242.00  | 131,361.99  | 122,411.66  |
| 8  | Physical Medicine & Rehab      | 114,634.30  | 89,711.96   | 117,991.77  |
| 9  | Plastic Surgery                | -           | -           | -           |
| 10 | Psychiatry                     | 148,655.30  | 142,051.57  | 140,103.74  |
| 11 | Radiation-Diagnostic/ Oncology | 122,974.40  | 128,357.77  | 112,561.25  |
| 12 | Surgery                        | 124,855.50  | 120,762.86  | 108,737.04  |
| 13 | Urology                        | 105,823.00  | 103,921.18  | 102,049.98  |
| 14 |                                |             |             |             |
| 15 | <b>K08</b>                     | <b>2011</b> | <b>2012</b> | <b>2013</b> |
| 16 | Anesthesiology                 | 125,868.50  | 128,416.50  | 133,159.39  |
| 17 | Dermatology                    | 123,634.20  | 119,317.51  | 109,927.81  |
| 18 | Emergency Medicine             | 141,586.00  | 139,463.23  | 120,582.68  |
| 19 | Family Medicine                | 122,205.80  | 120,970.95  | 130,721.14  |
| 20 | Internal Medicine/ Medicine    | 135,478.30  | 132,196.42  | 132,061.10  |
| 21 | Neurology                      | 162,383.80  | 157,712.95  | 162,888.25  |
| 22 | Neurosurgery                   | 165,681.90  | 167,867.81  | 154,935.00  |
| 23 | Obstetrics and Gynecology      | 134,050.10  | 132,160.77  | 131,198.30  |
| 24 | Ophthalmology                  | 204,350.20  | 207,180.86  | 177,453.73  |
| 25 | Orthopedics                    | 179,280.00  | 131,949.24  | 125,147.80  |
| 26 | Otolaryngology                 | 166,228.00  | 153,552.79  | 170,525.96  |
| 27 | Pathology                      | 127,919.40  | 127,555.55  | 122,472.03  |
| 28 | Pediatrics                     | 131,701.80  | 135,236.58  | 134,387.48  |
| 29 | Physical Medicine & Rehab      | 124,929.00  | 122,683.81  | 120,474.77  |
| 30 | Plastic Surgery                | -           | -           | -           |
| 31 | Psychiatry                     | 167,165.70  | 159,100.07  | 150,932.38  |
| 32 | Radiation-Diagnostic/ Oncology | 162,287.60  | 161,047.92  | 158,148.10  |
| 33 | Surgery                        | 133,971.00  | 138,597.38  | 128,653.97  |
| 34 | Urology                        | 152,109.50  | 146,981.94  | 121,925.34  |
| 35 |                                |             |             |             |
| 36 | <b>K23</b>                     | <b>2011</b> | <b>2012</b> | <b>2013</b> |
| 37 | Anesthesiology                 | 133,340.70  | 153,030.05  | 136,406.44  |
| 38 | Dermatology                    | 122,563.30  | 120,470.81  | 81,000.55   |
| 39 | Emergency Medicine             | 130,236.80  | 138,218.22  | 148,593.07  |
| 40 | Family Medicine                | 154,195.60  | 154,135.32  | 144,757.48  |
| 41 | Internal Medicine/ Medicine    | 145,051.40  | 143,956.41  | 143,924.58  |
| 42 | Neurology                      | 147,474.40  | 149,145.44  | 156,272.35  |

|    |                                |            |            |            |
|----|--------------------------------|------------|------------|------------|
| 1  |                                |            |            |            |
| 2  | Neurosurgery                   | 185,974.00 | 174,788.46 | 177,890.38 |
| 3  | Obstetrics and Gynecology      | 133,524.90 | 126,706.10 | 121,630.15 |
| 4  | Ophthalmology                  | 190,213.70 | 209,524.57 | 196,121.24 |
| 5  | Orthopedics                    | 168,729.00 | 127,903.29 | 102,932.35 |
| 6  | Otolaryngology                 | 185,635.10 | 204,843.04 | 198,460.46 |
| 7  | Pathology                      | 129,132.00 | 131,033.31 | 127,655.29 |
| 8  | Pediatrics                     | 137,762.10 | 134,557.71 | 133,286.30 |
| 9  | Physical Medicine & Rehab      | 142,022.90 | 154,311.50 | 145,726.94 |
| 10 | Plastic Surgery                | -          | -          | -          |
| 11 | Psychiatry                     | 160,234.10 | 152,786.21 | 156,158.56 |
| 12 | Radiation-Diagnostic/ Oncology | 158,602.70 | 161,810.96 | 152,274.85 |
| 13 | Surgery                        | 131,087.50 | 136,724.65 | 129,694.30 |
| 14 | Urology                        | 157,160.00 | 151,176.38 | 143,171.13 |
| 15 |                                |            |            |            |
| 16 |                                |            |            |            |
| 17 |                                |            |            |            |
| 18 |                                |            |            |            |
| 19 |                                |            |            |            |
| 20 |                                |            |            |            |
| 21 |                                |            |            |            |
| 22 |                                |            |            |            |
| 23 |                                |            |            |            |
| 24 |                                |            |            |            |
| 25 |                                |            |            |            |
| 26 |                                |            |            |            |
| 27 |                                |            |            |            |

| 28 | <b>R01</b>                     | <b>2011</b> | <b>2012</b> | <b>2013</b> |
|----|--------------------------------|-------------|-------------|-------------|
| 29 | Anesthesiology                 | 374,447.70  | 387,018.12  | 367,864.69  |
| 30 | Dermatology                    | 346,269.00  | 347,515.54  | 318,003.28  |
| 31 | Emergency Medicine             | 466,096.40  | 422,376.83  | 443,659.10  |
| 32 | Family Medicine                | 487,546.90  | 479,451.33  | 468,742.22  |
| 33 | Internal Medicine/ Medicine    | 397,304.00  | 394,784.20  | 380,268.88  |
| 34 | Neurology                      | 410,236.30  | 395,656.34  | 382,669.04  |
| 35 | Neurosurgery                   | 349,190.00  | 354,727.66  | 323,017.88  |
| 36 | Obstetrics and Gynecology      | 346,000.80  | 347,256.98  | 332,413.51  |
| 37 | Ophthalmology                  | 422,226.60  | 398,076.94  | 394,160.96  |
| 38 | Orthopedics                    | 339,055.70  | 336,438.95  | 317,069.32  |
| 39 | Otolaryngology                 | 366,140.90  | 367,853.94  | 341,508.35  |
| 40 | Pathology                      | 349,328.10  | 354,907.66  | 333,820.20  |
| 41 | Pediatrics                     | 406,339.10  | 411,122.59  | 386,712.45  |
| 42 | Physical Medicine & Rehab      | 362,821.50  | 366,881.93  | 385,833.45  |
| 43 | Plastic Surgery                | 322,374.70  | -           | 518,241.42  |
| 44 | Psychiatry                     | 465,597.40  | 455,643.14  | 433,159.11  |
| 45 | Radiation-Diagnostic/ Oncology | 388,720.60  | 396,611.26  | 371,707.90  |
| 46 | Surgery                        | 355,171.00  | 353,022.56  | 333,002.72  |
| 47 | Urology                        | 307,852.70  | 320,142.49  | 290,710.27  |
| 48 |                                |             |             |             |
| 49 |                                |             |             |             |
| 50 |                                |             |             |             |
| 51 | <b>R03</b>                     |             |             |             |
| 52 | Anesthesiology                 | 75,013.50   | 78,681.41   | 71,194.77   |
| 53 | Dermatology                    | 65,179.20   | 68,085.66   | 72,863.57   |
| 54 |                                |             |             |             |
| 55 |                                |             |             |             |
| 56 |                                |             |             |             |
| 57 |                                |             |             |             |
| 58 |                                |             |             |             |
| 59 |                                |             |             |             |
| 60 |                                |             |             |             |

|    |                                |            |            |            |
|----|--------------------------------|------------|------------|------------|
| 1  |                                |            |            |            |
| 2  | Emergency Medicine             | 63,905.00  | 84,790.28  | 66,195.60  |
| 3  | Family Medicine                | 92,104.25  | 78,516.21  | 90,613.26  |
| 4  | Internal Medicine/ Medicine    | 80,464.41  | 81,655.24  | 78,168.05  |
| 5  | Neurology                      | 96,460.50  | 71,674.42  | 75,032.69  |
| 6  | Neurosurgery                   | 130,434.70 | 95,836.38  | 92,563.34  |
| 7  | Obstetrics and Gynecology      | 75,107.75  | 70,725.60  | 73,716.92  |
| 8  | Ophthalmology                  | -          | -          | -          |
| 9  | Orthopedics                    | 81,667.80  | 77,321.47  | 70,466.04  |
| 10 | Otolaryngology                 | 132,187.70 | 123,972.62 | 120,784.90 |
| 11 | Pathology                      | 77,017.92  | 67,730.02  | 66,023.11  |
| 12 | Pediatrics                     | 76,878.26  | 81,733.16  | 74,380.44  |
| 13 | Physical Medicine & Rehab      | 96,047.43  | 76,355.22  | 88,989.26  |
| 14 | Plastic Surgery                | -          | -          | -          |
| 15 | Psychiatry                     | 106,102.80 | 95,101.79  | 85,107.16  |
| 16 | Radiation-Diagnostic/ Oncology | 97,959.88  | 72,670.09  | 71,624.96  |
| 17 | Surgery                        | 90,946.47  | 85,389.62  | 78,149.29  |
| 18 | Urology                        | 78,000.00  | 78,765.22  | 73,991.85  |
| 19 |                                |            |            |            |
| 20 | <b>R21</b>                     |            |            |            |
| 21 | Anesthesiology                 | 198,626.80 | 202,931.92 | 200,512.01 |
| 22 | Dermatology                    | 183,150.90 | 211,595.17 | 198,551.01 |
| 23 | Emergency Medicine             | 236,297.20 | 243,178.48 | 217,596.65 |
| 24 | Family Medicine                | 195,393.30 | 204,907.27 | 178,635.34 |
| 25 | Internal Medicine/ Medicine    | 206,711.70 | 198,338.77 | 187,682.25 |
| 26 | Neurology                      | 201,619.80 | 197,927.70 | 194,030.74 |
| 27 | Neurosurgery                   | 185,724.80 | 203,017.25 | 194,412.81 |
| 28 | Obstetrics and Gynecology      | 206,047.70 | 185,098.28 | 204,787.15 |
| 29 | Ophthalmology                  | 184,974.60 | 199,501.79 | 188,450.64 |
| 30 | Orthopedics                    | 197,322.00 | 177,705.67 | 172,248.86 |
| 31 | Otolaryngology                 | 190,945.80 | 198,978.37 | 211,771.13 |
| 32 | Pathology                      | 195,703.40 | 201,274.55 | 193,362.93 |
| 33 | Pediatrics                     | 191,759.30 | 200,806.81 | 187,381.86 |
| 34 | Physical Medicine & Rehab      | 195,226.20 | 200,605.49 | 191,513.12 |
| 35 | Plastic Surgery                | -          | -          | -          |
| 36 | Psychiatry                     | 206,745.70 | 206,231.33 | 193,165.81 |
| 37 | Radiation-Diagnostic/ Oncology | 210,700.90 | 211,749.55 | 191,648.61 |
| 38 | Surgery                        | 192,224.20 | 193,901.58 | 187,458.62 |
| 39 | Urology                        | 203,200.80 | 188,726.09 | 161,644.63 |
| 40 |                                |            |            |            |
| 41 | <b>P30</b>                     |            |            |            |
| 42 | Anesthesiology                 | -          | -          | -          |
| 43 | Dermatology                    | 508,803.50 | 532,155.32 | 730,031.84 |
| 44 | Emergency Medicine             | -          | -          | -          |
| 45 |                                |            |            |            |

|    |                               |              |              |              |
|----|-------------------------------|--------------|--------------|--------------|
| 1  |                               |              |              |              |
| 2  | Family Medicine               | -            | 117,834.06   | 114,127.44   |
| 3  | Internal Medicine/ Medicine   | 1,322,479.00 | 1,450,209.24 | 1,589,212.16 |
| 4  | Neurology                     | 909,600.70   | 778,560.35   | 843,675.37   |
| 5  | Neurosurgery                  | 945,027.00   | 867,907.05   | 803,938.25   |
| 6  | Obstetrics and Gynecology     | 1,933,778.00 | 1,899,023.65 | 2,486,985.41 |
| 7  | Ophthalmology                 | 604,815.60   | 573,539.36   | 566,509.92   |
| 8  | Orthopedics                   | 625,387.50   | 616,163.02   | 576,372.00   |
| 9  | Otolaryngology                | 622,200.80   | 593,154.89   | 633,921.85   |
| 10 | Pathology                     | 1,470,235.00 | 940,171.36   | 1,750,540.48 |
| 11 | Pediatrics                    | 1,546,389.00 | 1,085,995.59 | 932,632.72   |
| 12 | Physical Medicine & Rehab     | -            | -            | -            |
| 13 | Plastic Surgery               | -            | -            | -            |
| 14 | Psychiatry                    | 1,359,067.00 | 1,123,399.08 | 1,107,281.26 |
| 15 | Radiation-Diagnostic/Oncology | 570,185.40   | 619,675.84   | 827,768.87   |
| 16 | Surgery                       | 1,941,337.00 | 1,918,014.11 | 1,562,135.25 |
| 17 | Urology                       | 690,688.70   | 773,590.60   | 760,111.72   |
| 18 |                               |              |              |              |
| 19 |                               |              |              |              |
| 20 | <b>U01</b>                    |              |              |              |
| 21 | Anesthesiology                | 471,964.90   | 442,964.76   | 484,419.78   |
| 22 | Dermatology                   | 269,879.00   | 492,217.11   | 338,616.85   |
| 23 | Emergency Medicine            | 1,824,301.00 | 1,275,389.55 | 465,420.72   |
| 24 | Family Medicine               | 478,966.10   | 576,027.23   | 716,164.93   |
| 25 | Internal Medicine/ Medicine   | 1,022,969.00 | 946,837.86   | 954,535.71   |
| 26 | Neurology                     | 1,871,063.00 | 1,689,545.24 | 1,724,161.76 |
| 27 | Neurosurgery                  | 768,340.80   | 1,127,973.37 | 1,887,117.89 |
| 28 | Obstetrics and Gynecology     | 1,693,429.00 | 984,978.27   | 628,724.50   |
| 29 | Ophthalmology                 | 586,612.20   | 343,776.57   | 373,612.29   |
| 30 | Orthopedics                   | -            | -            | 503,040.43   |
| 31 | Otolaryngology                | 353,177.20   | 203,764.48   | 366,998.90   |
| 32 | Pathology                     | 838,184.80   | 539,759.26   | 570,687.47   |
| 33 | Pediatrics                    | 754,255.50   | 762,195.44   | 757,360.44   |
| 34 | Physical Medicine & Rehab     | 142,161.00   | 203,732.56   | 523,313.97   |
| 35 | Plastic Surgery               | -            | -            | -            |
| 36 | Psychiatry                    | 783,933.80   | 662,879.48   | 652,704.12   |
| 37 | Radiation-Diagnostic/Oncology | 473,532.00   | 469,053.42   | 608,125.98   |
| 38 | Surgery                       | 577,115.30   | 726,312.81   | 656,651.67   |
| 39 | Urology                       | 960,907.90   | 742,629.31   | 669,953.96   |
| 40 |                               |              |              |              |
| 41 |                               |              |              |              |
| 42 |                               |              |              |              |
| 43 |                               |              |              |              |
| 44 |                               |              |              |              |
| 45 |                               |              |              |              |
| 46 |                               |              |              |              |
| 47 |                               |              |              |              |
| 48 |                               |              |              |              |
| 49 |                               |              |              |              |
| 50 |                               |              |              |              |
| 51 |                               |              |              |              |
| 52 |                               |              |              |              |
| 53 |                               |              |              |              |
| 54 |                               |              |              |              |
| 55 |                               |              |              |              |
| 56 |                               |              |              |              |
| 57 |                               |              |              |              |
| 58 |                               |              |              |              |
| 59 |                               |              |              |              |
| 60 |                               |              |              |              |

1  
2  
3  
4  
5  
6  
7  
8  
9  
10  
11  
12  
13  
14  
15  
16  
17  
18  
19  
20  
21  
22  
23  
24  
25  
26  
27  
28  
29  
30  
31  
32  
33  
34  
35  
36  
37  
38  
39  
40  
41  
42  
43  
44  
45  
46  
47  
48  
49  
50  
51  
52  
53  
54  
55  
56  
57  
58  
59  
60

For peer review only

1  
2  
3  
4  
5  
6  
7  
8  
9  
10  
11  
12  
13  
14  
15  
16  
17  
18  
19  
20  
21  
22  
23  
24  
25  
26  
27  
28  
29  
30  
31  
32  
33  
34  
35  
36  
37  
38  
39  
40  
41  
42  
43  
44  
45  
46  
47  
48  
49  
50  
51  
52  
53  
54  
55  
56  
57  
58  
59  
60

For peer review only

1  
2  
3  
4  
5  
6  
7  
8  
9  
10  
11  
12  
13  
14  
15  
16  
17  
18  
19  
20  
21  
22  
23  
24  
25  
26  
27  
28  
29  
30  
31  
32  
33  
34  
35  
36  
37  
38  
39  
40  
41  
42  
43  
44  
45  
46  
47  
48  
49  
50  
51  
52  
53  
54  
55  
56  
57  
58  
59  
60

For peer review only

1  
2  
3  
4  
5  
6  
7  
8  
9  
10  
11  
12  
13  
14  
15  
16  
17  
18  
19  
20  
21  
22  
23  
24  
25  
26  
27  
28  
29  
30  
31  
32  
33  
34  
35  
36  
37  
38  
39  
40  
41  
42  
43  
44  
45  
46  
47  
48  
49  
50  
51  
52  
53  
54  
55  
56  
57  
58  
59  
60

For peer review only



1  
2  
3  
4  
5  
6  
7  
8  
9  
10  
11  
12  
13  
14  
15  
16  
17  
18  
19  
20  
21  
22  
23  
24  
25  
26  
27  
28  
29  
30  
31  
32  
33  
34  
35  
36  
37  
38  
39  
40  
41  
42  
43  
44  
45  
46  
47  
48  
49  
50  
51  
52  
53  
54  
55  
56  
57  
58  
59  
60

For peer review only

1  
2  
3  
4  
5  
6  
7  
8  
9  
10  
11  
12  
13  
14  
15  
16  
17  
18  
19  
20  
21  
22  
23  
24  
25  
26  
27  
28  
29  
30  
31  
32  
33  
34  
35  
36  
37  
38  
39  
40  
41  
42  
43  
44  
45  
46  
47  
48  
49  
50  
51  
52  
53  
54  
55  
56  
57  
58  
59  
60

For peer review only

1  
2  
3  
4  
5  
6  
7  
8  
9  
10  
11  
12  
13  
14  
15  
16  
17  
18  
19  
20  
21  
22  
23  
24  
25  
26  
27  
28  
29  
30  
31  
32  
33  
34  
35  
36  
37  
38  
39  
40  
41  
42  
43  
44  
45  
46  
47  
48  
49  
50  
51  
52  
53  
54  
55  
56  
57  
58  
59  
60

For peer review only

1  
2  
3  
4  
5  
6  
7  
8  
9  
10  
11  
12  
13  
14  
15  
16  
17  
18  
19  
20  
21  
22  
23  
24  
25  
26  
27  
28  
29  
30  
31  
32  
33  
34  
35  
36  
37  
38  
39  
40  
41  
42  
43  
44  
45  
46  
47  
48  
49  
50  
51  
52  
53  
54  
55  
56  
57  
58  
59  
60

For peer review only

1  
2  
3  
4  
5  
6  
7  
8  
9  
10  
11  
12  
13  
14  
15  
16  
17  
18  
19  
20  
21  
22  
23  
24  
25  
26  
27  
28  
29  
30  
31  
32  
33  
34  
35  
36  
37  
38  
39  
40  
41  
42  
43  
44  
45  
46  
47  
48  
49  
50  
51  
52  
53  
54  
55  
56  
57  
58  
59  
60

For peer review only

1  
2  
3  
4  
5  
6  
7  
8  
9  
10  
11  
12  
13  
14  
15  
16  
17  
18  
19  
20  
21  
22  
23  
24  
25  
26  
27  
28  
29  
30  
31  
32  
33  
34  
35  
36  
37  
38  
39  
40  
41  
42  
43  
44  
45  
46  
47  
48  
49  
50  
51  
52  
53  
54  
55  
56  
57  
58  
59  
60

For peer review only

1  
2  
3  
4  
5  
6  
7  
8  
9  
10  
11  
12  
13  
14  
15  
16  
17  
18  
19  
20  
21  
22  
23  
24  
25  
26  
27  
28  
29  
30  
31  
32  
33  
34  
35  
36  
37  
38  
39  
40  
41  
42  
43  
44  
45  
46  
47  
48  
49  
50  
51  
52  
53  
54  
55  
56  
57  
58  
59  
60

For peer review only

1  
2  
3  
4  
5  
6  
7  
8  
9  
10  
11  
12  
13  
14  
15  
16  
17  
18  
19  
20  
21  
22  
23  
24  
25  
26  
27  
28  
29  
30  
31  
32  
33  
34  
35  
36  
37  
38  
39  
40  
41  
42  
43  
44  
45  
46  
47  
48  
49  
50  
51  
52  
53  
54  
55  
56  
57  
58  
59  
60

|  | 0.946  | 0.935  | 0.928  | 0.911  | 0.891  |
|--|--------|--------|--------|--------|--------|
|  | 2014   | 2015   | 2016   | 2017   | 2018   |
|  | 289    | 22     | 54     | 156    | 257    |
|  | 81     | 139    | 155    | 211    | 208    |
|  | 0      | 0      | 0      | 0      | 0      |
|  | 53     | 19     | 0      | 0      | 0      |
|  | 5244   | 5456   | 5953   | 5684   | 5732   |
|  | 1456   | 1363   | 1202   | 1125   | 1354   |
|  | 391    | 470    | 499    | 482    | 714    |
|  | 203    | 258    | 212    | 133    | 317    |
|  | 465    | 602    | 369    | 392    | 374    |
|  | 219    | 300    | 267    | 302    | 382    |
|  | 481    | 278    | 430    | 542    | 483    |
|  | 968    | 1129   | 1269   | 813    | 937    |
|  | 1163   | 811    | 717    | 672    | 679    |
|  | 53     | 38     | 64     | 171    | 219    |
|  | 0      | 0      | 0      | 0      | 0      |
|  | 1186   | 1332   | 1447   | 1074   | 1234   |
|  | 52     | 105    | 443    | 349    | 382    |
|  | 930    | 1075   | 953    | 859    | 1145   |
|  | 211    | 113    | 145    | 108    | 66     |
|  |        |        |        |        |        |
|  |        |        |        |        |        |
|  | 3082   | 4502   | 4608   | 4897   | 4487   |
|  | 1741   | 2206   | 2187   | 2067   | 1942   |
|  | 0      | 0      | 157    | 674    | 796    |
|  | 1407   | 1410   | 1232   | 2002   | 1549   |
|  | 105445 | 107871 | 111165 | 109429 | 118174 |
|  | 9489   | 8427   | 9240   | 9845   | 10043  |
|  | 568    | 1627   | 1688   | 1498   | 2025   |
|  | 2481   | 2511   | 2265   | 1963   | 1484   |
|  | 4153   | 3746   | 3578   | 3429   | 3620   |
|  | 1530   | 1577   | 1555   | 1670   | 1397   |
|  | 3474   | 3705   | 3495   | 3957   | 3894   |
|  | 25454  | 22895  | 22311  | 22850  | 21978  |
|  | 20485  | 22899  | 22773  | 19985  | 21595  |
|  | 798    | 878    | 931    | 969    | 1146   |
|  | 0      | 0      | 0      | 0      | 0      |
|  | 18081  | 16962  | 18842  | 19260  | 19190  |
|  | 4622   | 5123   | 6687   | 5473   | 6943   |



|   |       |      |       |       |       |
|---|-------|------|-------|-------|-------|
| 1 |       |      |       |       |       |
| 2 | 10223 | 9822 | 11435 | 12029 | 14262 |
| 3 | 1103  | 606  | 840   | 568   | 298   |
| 4 |       |      |       |       |       |
| 5 |       |      |       |       |       |
| 6 |       |      |       |       |       |
| 7 |       |      |       |       |       |
| 8 |       |      |       |       |       |
| 9 |       |      |       |       |       |

|    | 2014  | 2015  | 2016  | 2017  | 2018  |
|----|-------|-------|-------|-------|-------|
| 10 |       |       |       |       |       |
| 11 |       |       |       |       |       |
| 12 | 580   | 827   | 824   | 940   | 1077  |
| 13 | 421   | 605   | 723   | 1167  | 1194  |
| 14 | 125   | 258   | 0     | 0     | 37    |
| 15 | 848   | 870   | 994   | 990   | 1138  |
| 16 |       |       |       |       |       |
| 17 | 17711 | 19228 | 17607 | 17748 | 19610 |
| 18 | 2416  | 2339  | 2606  | 2492  | 2347  |
| 19 | 0     | 0     | 97    | 0     | 283   |
| 20 | 605   | 729   | 688   | 869   | 687   |
| 21 | 124   | 0     | 0     | 132   | 225   |
| 22 | 804   | 1034  | 821   | 684   | 548   |
| 23 | 246   | 0     | 0     | 0     | 0     |
| 24 | 1419  | 1410  | 1866  | 1919  | 2101  |
| 25 | 2332  | 2033  | 2863  | 2876  | 2722  |
| 26 | 693   | 808   | 920   | 1537  | 1482  |
| 27 | 0     | 0     | 0     | 0     | 0     |
| 28 | 10816 | 10038 | 9444  | 9547  | 9075  |
| 29 | 1490  | 1599  | 1789  | 2465  | 2171  |
| 30 | 838   | 1266  | 1592  | 1897  | 1416  |
| 31 | 130   | 412   | 551   | 771   | 623   |
| 32 |       |       |       |       |       |
| 33 |       |       |       |       |       |
| 34 |       |       |       |       |       |
| 35 |       |       |       |       |       |
| 36 |       |       |       |       |       |
| 37 |       |       |       |       |       |
| 38 |       |       |       |       |       |
| 39 |       |       |       |       |       |
| 40 |       |       |       |       |       |
| 41 |       |       |       |       |       |
| 42 |       |       |       |       |       |
| 43 | 2152  | 1983  | 1909  | 2426  | 3377  |
| 44 | 1639  | 1686  | 1794  | 1785  | 1605  |
| 45 | 561   | 698   | 1012  | 1035  | 1144  |
| 46 | 260   | 138   | 135   | 153   | 150   |
| 47 |       |       |       |       |       |
| 48 | 32393 | 29952 | 34489 | 34127 | 37054 |
| 49 | 5477  | 5428  | 5024  | 5180  | 5069  |
| 50 | 1091  | 1551  | 1732  | 2025  | 1789  |
| 51 | 566   | 228   | 347   | 304   | 808   |
| 52 | 5841  | 5716  | 5042  | 5015  | 4703  |
| 53 | 414   | 454   | 808   | 1095  | 918   |
| 54 | 1734  | 2119  | 1919  | 1535  | 1722  |
| 55 | 4597  | 4269  | 3645  | 3466  | 4169  |
| 56 | 11704 | 10916 | 12449 | 15623 | 17411 |
| 57 |       |       |       |       |       |
| 58 |       |       |       |       |       |
| 59 |       |       |       |       |       |
| 60 |       |       |       |       |       |

|    |      |      |      |      |      |
|----|------|------|------|------|------|
| 1  |      |      |      |      |      |
| 2  | 0    | 0    | 0    | 0    | 152  |
| 3  | 0    | 0    | 0    | 0    | 0    |
| 4  |      |      |      |      |      |
| 5  | 4259 | 3465 | 3613 | 3886 | 3294 |
| 6  | 866  | 778  | 160  | 485  | 543  |
| 7  |      |      |      |      |      |
| 8  | 6217 | 5070 | 5684 | 5781 | 6531 |
| 9  | 1003 | 619  | 764  | 768  | 739  |
| 10 |      |      |      |      |      |

|    | 2014  | 2015  | 2016  | 2017  | 2018  |
|----|-------|-------|-------|-------|-------|
| 12 |       |       |       |       |       |
| 13 |       |       |       |       |       |
| 14 | 1925  | 1733  | 1427  | 2048  | 1919  |
| 15 | 116   | 240   | 621   | 633   | 1215  |
| 16 |       |       |       |       |       |
| 17 | 2042  | 2070  | 2888  | 3402  | 2969  |
| 18 | 416   | 606   | 543   | 736   | 713   |
| 19 |       |       |       |       |       |
| 20 | 41699 | 37963 | 40250 | 39418 | 39267 |
| 21 | 7930  | 8074  | 6522  | 7988  | 8324  |
| 22 |       |       |       |       |       |
| 23 | 657   | 786   | 674   | 669   | 655   |
| 24 | 1604  | 1085  | 601   | 1042  | 1204  |
| 25 |       |       |       |       |       |
| 26 | 2117  | 2519  | 3776  | 4158  | 3615  |
| 27 | 301   | 182   | 322   | 158   | 329   |
| 28 |       |       |       |       |       |
| 29 | 1799  | 2431  | 1989  | 2218  | 2165  |
| 30 | 383   | 259   | 127   | 133   | 126   |
| 31 |       |       |       |       |       |
| 32 | 11458 | 10265 | 9511  | 13565 | 14588 |
| 33 | 1550  | 1221  | 1142  | 904   | 240   |
| 34 | 0     | 0     | 0     | 0     | 0     |
| 35 |       |       |       |       |       |
| 36 | 15245 | 14635 | 14210 | 16482 | 15952 |
| 37 | 615   | 605   | 644   | 659   | 320   |
| 38 |       |       |       |       |       |
| 39 | 1487  | 1374  | 1800  | 1467  | 1305  |
| 40 | 440   | 282   | 404   | 284   | 128   |
| 41 |       |       |       |       |       |
| 42 |       |       |       |       |       |
| 43 |       |       |       |       |       |
| 44 |       |       |       |       |       |
| 45 |       |       |       |       |       |

|    | 2014    | 2015    | 2016    | 2017    | 2018    |
|----|---------|---------|---------|---------|---------|
| 46 |         |         |         |         |         |
| 47 | 83392   | 78886   | 79607   | 80610   | 93803   |
| 48 |         |         |         |         |         |
| 49 | 37257   | 37230   | 38990   | 36340   | 43317   |
| 50 |         |         |         |         |         |
| 51 | 14682   | 15553   | 17188   | 19465   | 21550   |
| 52 | 31905   | 36462   | 35911   | 35408   | 40143   |
| 53 |         |         |         |         |         |
| 54 | 1120596 | 1114722 | 1196474 | 1271073 | 1352645 |
| 55 | 205536  | 205387  | 227921  | 257452  | 300079  |
| 56 | 45065   | 57276   | 60500   | 63311   | 68668   |
| 57 |         |         |         |         |         |
| 58 | 45424   | 48769   | 59162   | 68762   | 70422   |
| 59 | 147730  | 138320  | 137147  | 143244  | 151050  |
| 60 | 42067   | 39371   | 43727   | 47356   | 49434   |

|    |        |        |        |        |        |
|----|--------|--------|--------|--------|--------|
| 1  |        |        |        |        |        |
| 2  | 55001  | 59323  | 59051  | 61567  | 70025  |
| 3  | 264298 | 269181 | 274383 | 271399 | 29710  |
| 4  | 305897 | 293758 | 289524 | 27283  | 290224 |
| 5  | 14274  | 12785  | 16268  | 21410  | 24093  |
| 6  |        |        |        |        |        |
| 7  | 286    | 0      | 0      | 304    | 0      |
| 8  | 397375 | 374869 | 400432 | 414312 | 440072 |
| 9  | 190462 | 197908 | 214455 | 234087 | 261650 |
| 10 | 127291 | 133590 | 134683 | 148502 | 157442 |
| 11 |        |        |        |        |        |
| 12 | 21989  | 20300  | 19113  | 21182  | 21508  |
| 13 |        |        |        |        |        |
| 14 |        |        |        |        |        |
| 15 |        |        |        |        |        |

|    | 2014     | 2015    | 2016    | 2017    | 2018    |
|----|----------|---------|---------|---------|---------|
| 16 |          |         |         |         |         |
| 17 |          |         |         |         |         |
| 18 | 504103   | 301720  | 285921  | 352424  | 680256  |
| 19 | 300979   | 589193  | 653720  | 488341  | 276333  |
| 20 | 107849   | 38853   | 385440  | 411616  | 312535  |
| 21 | 480558   | 401656  | 37805   | 141804  | 159654  |
| 22 |          |         |         |         |         |
| 23 | 10173250 | 9067487 | 7335664 | 7148206 | 7626355 |
| 24 | 994639   | 1176243 | 1566253 | 1258789 | 1055876 |
| 25 | 366021   | 555391  | 331750  | 14747   | 143470  |
| 26 | 760235   | 698223  | 931110  | 1213315 | 123877  |
| 27 | 185069   | 253702  | 75142   | 107322  | 17279   |
| 28 | 1125690  | 765132  | 464110  | 211358  | 320310  |
| 29 | 1862304  | 1764008 | 1562754 | 1637971 | 1167773 |
| 30 | 1373327  | 1160880 | 683176  | 941970  | 1602709 |
| 31 | 2464485  | 282719  | 3719758 | 2828719 | 3395635 |
| 32 | 567857   | 385948  | 366690  | 156994  | 437457  |
| 33 | 0        | 0       | 71431   | 70750   | 0       |
| 34 | 2255011  | 1982882 | 2086038 | 2405828 | 188504  |
| 35 | 1303405  | 1444522 | 67396   | 846034  | 1406328 |
| 36 | 1479772  | 1407292 | 1105646 | 1928022 | 1605242 |
| 37 | 336416   | 440688  | 278168  | 73826   | 75485   |
| 38 |          |         |         |         |         |
| 39 |          |         |         |         |         |
| 40 |          |         |         |         |         |
| 41 |          |         |         |         |         |
| 42 |          |         |         |         |         |
| 43 |          |         |         |         |         |
| 44 |          |         |         |         |         |
| 45 |          |         |         |         |         |
| 46 |          |         |         |         |         |
| 47 |          |         |         |         |         |

|    | 2014  | 2015  | 2016  | 2017  | 2018  |
|----|-------|-------|-------|-------|-------|
| 48 |       |       |       |       |       |
| 49 | 4776  | 5628  | 5576  | 4835  | 6776  |
| 50 | 4618  | 3455  | 2678  | 2826  | 2863  |
| 51 | 1074  | 992   | 797   | 962   | 1522  |
| 52 | 3701  | 4370  | 3751  | 2220  | 2193  |
| 53 | 70081 | 69479 | 73909 | 69783 | 68221 |
| 54 | 14075 | 14228 | 15704 | 15916 | 17350 |
| 55 | 4570  | 6818  | 7317  | 5213  | 4962  |
| 56 | 4626  | 4908  | 4388  | 4055  | 5121  |
| 57 | 5339  | 7513  | 6180  | 4503  | 5803  |
| 58 |       |       |       |       |       |
| 59 |       |       |       |       |       |
| 60 |       |       |       |       |       |

|    |       |       |       |       |       |
|----|-------|-------|-------|-------|-------|
| 1  |       |       |       |       |       |
| 2  | 2541  | 2692  | 2705  | 4694  | 6301  |
| 3  | 4787  | 4194  | 2723  | 2710  | 4661  |
| 4  |       |       |       |       |       |
| 5  | 27289 | 30879 | 30780 | 25776 | 21696 |
| 6  | 20906 | 23159 | 23173 | 21567 | 21997 |
| 7  |       |       |       |       |       |
| 8  | 1574  | 655   | 1836  | 2527  | 1876  |
| 9  | 0     | 0     | 0     | 0     | 0     |
| 10 |       |       |       |       |       |
| 11 | 34409 | 29761 | 28891 | 28879 | 27616 |
| 12 | 22416 | 23848 | 22283 | 20722 | 16091 |
| 13 |       |       |       |       |       |
| 14 | 9685  | 11994 | 12404 | 9066  | 8566  |
| 15 | 700   | 1686  | 2285  | 1605  | 1234  |
| 16 |       |       |       |       |       |
| 17 |       |       |       |       |       |

|    | 2014   | 2015   | 2016   | 2017   | 2018   |
|----|--------|--------|--------|--------|--------|
| 18 |        |        |        |        |        |
| 19 |        |        |        |        |        |
| 20 | 946    | 0      | 0      | 0      | 0      |
| 21 | 6517   | 6060   | 6894   | 5967   | 2932   |
| 22 |        |        |        |        |        |
| 23 | 0      | 0      | 0      | 0      | 0      |
| 24 | 449    | 444    | 441    | 1366   | 1454   |
| 25 |        |        |        |        |        |
| 26 | 374306 | 335930 | 344110 | 348406 | 348046 |
| 27 | 12264  | 12507  | 13538  | 13322  | 14824  |
| 28 |        |        |        |        |        |
| 29 | 1692   | 1636   | 592    | 570    | 545    |
| 30 | 5089   | 5412   | 5345   | 0      | 2206   |
| 31 |        |        |        |        |        |
| 32 | 16351  | 15584  | 14551  | 14312  | 15637  |
| 33 | 2906   | 2861   | 3263   | 3176   | 3081   |
| 34 | 4215   | 2802   | 2126   | 561    | 4894   |
| 35 |        |        |        |        |        |
| 36 | 34286  | 31529  | 39683  | 32469  | 12550  |
| 37 | 16148  | 15878  | 13828  | 13097  | 9740   |
| 38 |        |        |        |        |        |
| 39 | 0      | 0      | 0      | 0      | 0      |
| 40 | 0      | 0      | 0      | 0      | 0      |
| 41 |        |        |        |        |        |
| 42 | 15306  | 17132  | 12490  | 10633  | 8513   |
| 43 | 5610   | 11059  | 6323   | 8091   | 7685   |
| 44 |        |        |        |        |        |
| 45 | 15111  | 23661  | 23529  | 34296  | 30499  |
| 46 | 5018   | 4997   | 5874   | 0      | 0      |
| 47 |        |        |        |        |        |
| 48 |        |        |        |        |        |
|    | 2014   | 2015   | 2016   | 2017   | 2018   |
| 49 |        |        |        |        |        |
| 50 |        |        |        |        |        |
| 51 | 6599   | 5552   | 11212  | 8251   | 7459   |
| 52 | 2118   | 3818   | 2550   | 2900   | 3173   |
| 53 | 6643   | 4125   | 3066   | 5882   | 22501  |
| 54 | 9302   | 11065  | 8951   | 5709   | 7876   |
| 55 |        |        |        |        |        |
| 56 |        |        |        |        |        |
| 57 | 393630 | 345938 | 329892 | 357428 | 374589 |
| 58 | 74945  | 60500  | 81498  | 64163  | 99592  |
| 59 | 14227  | 10701  | 23901  | 24850  | 12366  |
| 60 | 10416  | 44349  | 9044   | 8012   | 10944  |

|    |       |       |       |       |       |
|----|-------|-------|-------|-------|-------|
| 1  |       |       |       |       |       |
| 2  | 1283  | 2775  | 3457  | 3533  | 5485  |
| 3  | 622   | 184   | 183   | 0     | 0     |
| 4  | 992   | 2442  | 2225  | 2644  | 3587  |
| 5  | 18593 | 18371 | 23050 | 24664 | 28968 |
| 6  | 95628 | 87939 | 78882 | 77451 | 78320 |
| 7  | 3296  | 3639  | 3361  | 3258  | 1728  |
| 8  | 0     | 0     | 0     | 0     | 383   |
| 9  | 57653 | 63027 | 55085 | 46821 | 52207 |
| 10 | 16233 | 18294 | 16084 | 32004 | 33367 |
| 11 | 32439 | 37570 | 33137 | 29027 | 34900 |
| 12 | 7318  | 6127  | 6740  | 6964  | 6162  |
| 13 |       |       |       |       |       |
| 14 |       |       |       |       |       |
| 15 |       |       |       |       |       |
| 16 |       |       |       |       |       |
| 17 |       |       |       |       |       |
| 18 |       |       |       |       |       |
| 19 |       |       |       |       |       |
| 20 |       |       |       |       |       |
| 21 |       |       |       |       |       |
| 22 |       |       |       |       |       |
| 23 |       |       |       |       |       |
| 24 |       |       |       |       |       |

|    | 2014   | 2015   | 2016   | 2017   | 2018   |
|----|--------|--------|--------|--------|--------|
| 25 |        |        |        |        |        |
| 26 | 7.02   | 0.53   | 1.30   | 3.74   | 6.10   |
| 27 | 7.03   | 11.90  | 13.02  | 17.48  | 16.88  |
| 28 | 0.00   | 0.00   | 0.00   | 0.00   | 0.00   |
| 29 | 0.48   | 0.17   | 0.00   | 0.00   | 0.00   |
| 30 | 46.58  | 47.82  | 51.85  | 49.18  | 48.63  |
| 31 | 109.69 | 101.77 | 88.73  | 82.01  | 8.98   |
| 32 | 74.28  | 87.92  | 91.85  | 87.19  | 126.63 |
| 33 | 4.95   | 6.22   | 5.11   | 3.20   | 7.51   |
| 34 | 25.16  | 32.40  | 19.73  | 20.84  | 19.60  |
| 35 | 11.36  | 15.70  | 14.04  | 15.90  | 20.07  |
| 36 | 51.36  | 29.52  | 45.32  | 56.92  | 50.02  |
| 37 | 71.69  | 85.00  | 97.18  | 63.34  | 73.53  |
| 38 | 20.43  | 14.10  | 12.38  | 11.49  | 11.41  |
| 39 | 5.87   | 4.16   | 6.91   | 18.37  | 22.93  |
| 40 | 0.00   | 0.00   | 0.00   | 0.00   | 0.00   |
| 41 | 31.64  | 35.29  | 38.12  | 28.10  | 32.06  |
| 42 | 1.36   | 2.70   | 11.30  | 8.76   | 9.41   |
| 43 | 36.86  | 42.57  | 37.90  | 34.27  | 45.24  |
| 44 | 21.50  | 11.51  | 14.64  | 10.86  | 6.56   |
| 45 |        |        |        |        |        |
| 46 |        |        |        |        |        |
| 47 |        |        |        |        |        |
| 48 |        |        |        |        |        |
| 49 |        |        |        |        |        |
| 50 |        |        |        |        |        |
| 51 |        |        |        |        |        |
| 52 |        |        |        |        |        |
| 53 |        |        |        |        |        |
| 54 |        |        |        |        |        |
| 55 |        |        |        |        |        |
| 56 |        |        |        |        |        |
| 57 | 75.08  | 108.87 | 110.88 | 117.27 | 106.81 |
| 58 | 150.87 | 188.49 | 184.11 | 171.50 | 158.05 |
| 59 | 0.00   | 0.00   | 3.82   | 15.91  | 18.19  |
| 60 |        |        |        |        |        |

|    |         |         |         |         |         |
|----|---------|---------|---------|---------|---------|
| 1  |         |         |         |         |         |
| 2  | 12.77   | 12.66   | 10.97   | 17.63   | 13.37   |
| 3  | 936.72  | 945.50  | 968.14  | 946.97  | 1002.63 |
| 4  | 714.85  | 629.20  | 681.69  | 717.76  | 720.92  |
| 5  | 107.92  | 304.27  | 310.40  | 270.88  | 359.03  |
| 6  | 60.28   | 60.55   | 54.50   | 47.12   | 35.16   |
| 7  | 225.03  | 201.49  | 191.30  | 182.24  | 189.87  |
| 8  | 79.44   | 82.36   | 81.54   | 87.88   | 73.36   |
| 9  | 370.92  | 393.71  | 369.12  | 415.47  | 403.49  |
| 10 | 1885.80 | 1723.29 | 1708.06 | 1779.74 | 1724.96 |
| 11 | 360.01  | 397.94  | 392.69  | 342.00  | 362.79  |
| 12 | 88.37   | 95.85   | 100.63  | 103.73  | 120.00  |
| 13 | 0.00    | 0.00    | 0.00    | 0.00    | 0.00    |
| 14 | 481.96  | 449.48  | 496.22  | 504.13  | 498.45  |
| 15 | 121.05  | 132.60  | 170.40  | 137.35  | 171.13  |
| 16 | 405.36  | 388.92  | 454.72  | 480.35  | 563.62  |
| 17 | 112.73  | 61.80   | 85.24   | 57.27   | 29.62   |
| 18 |         |         |         |         |         |
| 19 |         |         |         |         |         |
| 20 |         |         |         |         |         |
| 21 |         |         |         |         |         |
| 22 |         |         |         |         |         |
| 23 |         |         |         |         |         |
| 24 |         |         |         |         |         |
| 25 |         |         |         |         |         |
| 26 |         |         |         |         |         |
| 27 |         |         |         |         |         |
| 28 |         |         |         |         |         |
| 29 |         |         |         |         |         |

|    | 2014   | 2015   | 2016   | 2017   | 2018   |
|----|--------|--------|--------|--------|--------|
| 30 | 14.13  | 20.00  | 19.82  | 22.50  | 25.62  |
| 31 | 36.49  | 51.72  | 60.84  | 96.84  | 97.24  |
| 32 | 3.25   | 6.52   | 0.00   | 0.00   | 0.83   |
| 33 | 7.70   | 7.81   | 8.84   | 8.72   | 9.82   |
| 34 | 157.34 | 168.54 | 153.34 | 153.59 | 166.38 |
| 35 | 182.05 | 174.65 | 192.23 | 181.68 | 168.48 |
| 36 | 0.00   | 0.00   | 17.87  | 0.00   | 50.15  |
| 37 | 14.71  | 17.56  | 16.56  | 20.85  | 16.27  |
| 38 | 6.72   | 0.00   | 0.00   | 7.04   | 11.83  |
| 39 | 41.78  | 53.99  | 43.04  | 35.97  | 28.78  |
| 40 | 26.25  | 0.00   | 0.00   | 0.00   | 0.00   |
| 41 | 105.14 | 106.10 | 142.85 | 149.48 | 164.89 |
| 42 | 40.98  | 35.35  | 49.37  | 49.24  | 45.72  |
| 43 | 76.71  | 88.18  | 99.47  | 164.43 | 155.14 |
| 44 | 0.00   | 0.00   | 0.00   | 0.00   | 0.00   |
| 45 | 288.32 | 266.00 | 248.71 | 249.91 | 235.74 |
| 46 | 39.01  | 41.41  | 45.60  | 61.87  | 53.49  |
| 47 | 33.22  | 50.13  | 63.29  | 75.74  | 55.96  |
| 48 | 13.28  | 41.98  | 55.83  | 77.73  | 62.01  |
| 49 |        |        |        |        |        |
| 50 |        |        |        |        |        |
| 51 |        |        |        |        |        |
| 52 |        |        |        |        |        |
| 53 |        |        |        |        |        |
| 54 |        |        |        |        |        |
| 55 |        |        |        |        |        |
| 56 |        |        |        |        |        |
| 57 |        |        |        |        |        |
| 58 |        |        |        |        |        |
| 59 |        |        |        |        |        |
| 60 |        |        |        |        |        |

|    |        |        |        |        |        |
|----|--------|--------|--------|--------|--------|
| 1  |        |        |        |        |        |
| 2  | 52.43  | 47.96  | 45.95  | 58.10  | 80.39  |
| 3  | 142.12 | 143.95 | 151.07 | 148.11 | 130.64 |
| 4  | 14.60  | 17.62  | 24.71  | 24.44  | 26.13  |
| 5  | 2.37   | 1.24   | 1.21   | 1.35   | 1.29   |
| 6  | 287.77 | 262.52 | 300.37 | 295.32 | 314.38 |
| 7  | 412.62 | 405.32 | 370.65 | 377.64 | 363.84 |
| 8  | 207.43 | 290.02 | 318.51 | 366.19 | 317.22 |
| 9  | 13.76  | 5.50   | 8.34   | 7.30   | 19.16  |
| 10 | 316.52 | 307.41 | 269.53 | 266.50 | 246.69 |
| 11 | 21.50  | 23.69  | 42.35  | 57.60  | 48.27  |
| 12 | 185.21 | 225.15 | 202.75 | 161.12 | 178.42 |
| 13 | 340.57 | 321.33 | 279.02 | 269.96 | 327.25 |
| 14 | 205.70 | 189.70 | 214.68 | 267.35 | 292.49 |
| 15 | 0.00   | 0.00   | 0.00   | 0.00   | 15.95  |
| 16 | 0.00   | 0.00   | 0.00   | 0.00   | 0.00   |
| 17 | 113.52 | 91.82  | 95.16  | 101.73 | 85.55  |
| 18 | 22.67  | 20.14  | 4.06   | 12.18  | 13.40  |
| 19 | 246.53 | 200.75 | 226.01 | 230.87 | 258.12 |
| 20 | 102.48 | 63.12  | 77.54  | 77.48  | 73.48  |

|    | 2014   | 2015   | 2016   | 2017   | 2018   |
|----|--------|--------|--------|--------|--------|
| 21 | 46.90  | 41.91  | 34.33  | 49.04  | 45.66  |
| 22 | 10.08  | 20.55  | 52.22  | 52.47  | 98.92  |
| 23 | 53.15  | 52.30  | 70.49  | 80.35  | 67.81  |
| 24 | 3.77   | 5.44   | 4.82   | 6.48   | 6.15   |
| 25 | 370.43 | 332.75 | 350.54 | 341.11 | 333.16 |
| 26 | 597.40 | 602.87 | 481.16 | 582.33 | 597.49 |
| 27 | 125.01 | 146.91 | 124.05 | 121.00 | 116.09 |
| 28 | 38.96  | 26.15  | 14.46  | 25.02  | 28.56  |
| 29 | 114.74 | 135.46 | 201.82 | 220.99 | 189.63 |
| 30 | 15.62  | 9.50   | 16.86  | 8.31   | 17.28  |
| 31 | 192.08 | 258.31 | 210.04 | 232.81 | 224.33 |
| 32 | 28.40  | 19.51  | 9.73   | 10.36  | 9.96   |
| 33 | 201.37 | 178.38 | 164.01 | 232.13 | 245.05 |
| 34 | 171.55 | 133.18 | 123.42 | 96.79  | 25.18  |
| 35 | 0.00   | 0.00   | 0.00   | 0.00   | 0.00   |
| 36 | 406.38 | 387.83 | 374.25 | 431.42 | 414.35 |
| 37 | 16.11  | 15.66  | 16.42  | 16.52  | 7.89   |
| 38 | 58.96  | 54.43  | 71.54  | 58.60  | 51.57  |
| 39 | 44.97  | 28.72  | 41.01  | 28.66  | 12.77  |

1  
2  
3  
4  
5  
6  
7  
8  
9  
10  
11  
12  
13  
14  
15  
16  
17  
18  
19  
20  
21  
22  
23  
24  
25  
26  
27  
28  
29  
30  
31  
32  
33  
34  
35  
36  
37  
38  
39  
40  
41  
42  
43  
44  
45  
46  
47  
48  
49  
50  
51  
52  
53  
54  
55  
56  
57  
58  
59  
60

| 2014     | 2015     | 2016     | 2017     | 2018     |
|----------|----------|----------|----------|----------|
| 2031.25  | 1907.71  | 1915.65  | 1930.22  | 2232.64  |
| 3230.02  | 3180.43  | 3282.39  | 3015.51  | 3526.49  |
| 382.25   | 392.96   | 419.59   | 459.64   | 492.28   |
| 289.76   | 327.61   | 319.48   | 311.93   | 346.48   |
| 9954.83  | 9770.64  | 10420.17 | 10999.52 | 11476.32 |
| 15484.14 | 15336.52 | 16815.14 | 18768.82 | 21539.61 |
| 8569.79  | 10713.90 | 11124.49 | 11446.67 | 12176.25 |
| 1103.78  | 1175.71  | 1423.22  | 1650.70  | 1669.24  |
| 8004.87  | 7439.34  | 7332.12  | 7612.48  | 7923.10  |
| 2184.23  | 2056.45  | 2292.59  | 2492.32  | 2597.04  |
| 5872.72  | 6303.54  | 6236.54  | 6463.05  | 7255.41  |
| 19580.52 | 20260.44 | 21005.41 | 21138.62 | 23314.32 |
| 5375.82  | 5105.01  | 4992.74  | 4668.38  | 4875.54  |
| 1579.87  | 1395.17  | 1757.99  | 2291.52  | 2521.46  |
| 40.90    | 0.00     | 0.00     | 42.53    | 0.00     |
| 10592.16 | 9933.98  | 10545.85 | 10844.45 | 11430.88 |
| 4987.09  | 5122.90  | 5465.35  | 5874.80  | 6449.13  |
| 5047.13  | 5289.88  | 5355.64  | 5930.12  | 6222.28  |
| 2246.21  | 2069.70  | 1937.56  | 2135.08  | 2137.80  |

| 2014   | 2015   | 2016   | 2017   | 2018   |
|--------|--------|--------|--------|--------|
| 12.28  | 7.30   | 6.88   | 8.44   | 16.19  |
| 26.09  | 50.33  | 55.03  | 40.52  | 22.50  |
| 2.81   | 9.81   | 9.41   | 9.72   | 7.14   |
| 4.36   | 3.61   | 3.37   | 1.25   | 1.38   |
| 90.38  | 79.48  | 63.89  | 61.86  | 64.71  |
| 74.94  | 87.83  | 115.55 | 91.77  | 75.79  |
| 69.61  | 103.89 | 61.00  | 26.66  | 25.44  |
| 18.48  | 16.84  | 22.40  | 29.13  | 29.35  |
| 10.03  | 13.65  | 4.02   | 5.71   | 9.07   |
| 58.45  | 39.97  | 24.33  | 11.12  | 16.82  |
| 198.85 | 187.44 | 165.05 | 171.95 | 120.99 |
| 101.75 | 87.38  | 52.30  | 73.37  | 125.79 |
| 43.31  | 49.12  | 64.15  | 48.41  | 57.05  |
| 62.86  | 42.12  | 39.63  | 16.81  | 45.78  |
| 0.00   | 0.00   | 10.08  | 9.91   | 0.00   |
| 60.11  | 52.55  | 54.94  | 62.97  | 48.95  |



|   |       |       |       |       |       |
|---|-------|-------|-------|-------|-------|
| 1 |       |       |       |       |       |
| 2 | 34.13 | 37.40 | 17.17 | 21.24 | 34.67 |
| 3 | 58.67 | 55.73 | 43.96 | 76.99 | 63.44 |
| 4 |       |       |       |       |       |
| 5 | 34.37 | 44.93 | 28.20 | 7.44  | 7.50  |
| 6 |       |       |       |       |       |

|    | 2014    | 2015    | 2016    | 2017    | 2018    |
|----|---------|---------|---------|---------|---------|
| 9  | 116.33  | 136.10  | 134.19  | 115.78  | 161.28  |
| 10 |         |         |         |         |         |
| 11 | 400.33  | 295.17  | 225.42  | 234.51  | 233.04  |
| 12 | 27.95   | 25.07   | 19.46   | 22.73   | 34.77   |
| 13 |         |         |         |         |         |
| 14 | 33.61   | 39.27   | 33.37   | 19.56   | 18.93   |
| 15 | 622.56  | 608.99  | 643.68  | 603.88  | 578.81  |
| 16 |         |         |         |         |         |
| 17 | 1060.35 | 1062.42 | 1158.56 | 1160.26 | 1245.33 |
| 18 | 869.13  | 1275.22 | 1345.55 | 942.40  | 879.89  |
| 19 |         |         |         |         |         |
| 20 | 112.42  | 118.32  | 105.56  | 97.34   | 121.37  |
| 21 | 289.26  | 404.05  | 330.40  | 239.34  | 304.36  |
| 22 |         |         |         |         |         |
| 23 | 131.96  | 140.60  | 141.80  | 247.04  | 330.99  |
| 24 | 511.13  | 445.63  | 287.57  | 284.48  | 482.88  |
| 25 |         |         |         |         |         |
| 26 | 2021.66 | 2324.19 | 2356.36 | 2007.67 | 1702.83 |
| 27 | 367.40  | 402.47  | 399.61  | 369.09  | 369.53  |
| 28 |         |         |         |         |         |
| 29 | 174.25  | 71.48   | 198.37  | 270.40  | 196.35  |
| 30 | 0.00    | 0.00    | 0.00    | 0.00    | 0.00    |
| 31 |         |         |         |         |         |
| 32 | 917.20  | 788.66  | 760.91  | 755.89  | 717.34  |
| 33 | 586.92  | 617.30  | 567.88  | 520.04  | 396.60  |
| 34 |         |         |         |         |         |
| 35 | 383.99  | 474.94  | 493.24  | 362.04  | 338.53  |
| 36 | 71.47   | 171.89  | 231.66  | 161.78  | 122.63  |

|    | 2014    | 2015    | 2016    | 2017    | 2018    |
|----|---------|---------|---------|---------|---------|
| 39 |         |         |         |         |         |
| 40 | 23.04   | 0.00    | 0.00    | 0.00    | 0.00    |
| 41 |         |         |         |         |         |
| 42 | 565.01  | 517.67  | 580.33  | 495.15  | 238.70  |
| 43 | 0.00    | 0.00    | 0.00    | 0.00    | 0.00    |
| 44 |         |         |         |         |         |
| 45 | 4.09    | 3.99    | 3.92    | 12.04   | 12.54   |
| 46 | 3325.16 | 2944.45 | 2996.87 | 3015.02 | 2952.95 |
| 47 |         |         |         |         |         |
| 48 | 923.97  | 933.90  | 998.77  | 971.23  | 1064.05 |
| 49 | 321.85  | 305.94  | 108.84  | 103.02  | 96.73   |
| 50 |         |         |         |         |         |
| 51 | 123.66  | 130.47  | 128.58  | 0.00    | 52.29   |
| 52 | 886.01  | 838.17  | 777.91  | 760.60  | 820.18  |
| 53 |         |         |         |         |         |
| 54 | 150.88  | 149.47  | 171.07  | 167.15  | 161.84  |
| 55 | 449.98  | 297.75  | 224.58  | 58.84   | 507.06  |
| 56 |         |         |         |         |         |
| 57 | 2540.12 | 2373.11 | 3037.92 | 2528.92 | 984.96  |
| 58 | 283.77  | 275.95  | 238.45  | 224.13  | 163.62  |
| 59 |         |         |         |         |         |
| 60 | 0.00    | 0.00    | 0.00    | 0.00    | 0.00    |
|    | 408.00  | 453.99  | 328.93  | 278.31  | 221.12  |

|   |        |        |        |         |         |
|---|--------|--------|--------|---------|---------|
| 1 |        |        |        |         |         |
| 2 | 146.88 | 286.25 | 161.16 | 203.06  | 189.41  |
| 3 | 599.18 | 936.89 | 935.62 | 1369.56 | 1205.36 |
| 4 |        |        |        |         |         |
| 5 | 512.57 | 509.49 | 595.46 | 0.00    | 0.00    |
| 6 |        |        |        |         |         |
| 7 |        |        |        |         |         |

|    | 2014    | 2015    | 2016    | 2017    | 2018    |
|----|---------|---------|---------|---------|---------|
| 9  | 160.74  | 134.27  | 269.80  | 197.58  | 177.52  |
| 10 |         |         |         |         |         |
| 11 | 183.63  | 326.13  | 214.71  | 240.68  | 258.31  |
| 12 | 172.94  | 104.21  | 74.85   | 138.90  | 514.01  |
| 13 |         |         |         |         |         |
| 14 | 84.49   | 99.42   | 79.63   | 50.30   | 67.99   |
| 15 | 3496.82 | 3032.18 | 2873.05 | 3093.09 | 3178.15 |
| 16 | 5646.02 | 4517.67 | 6012.59 | 4677.68 | 7148.68 |
| 17 |         |         |         |         |         |
| 18 | 2705.41 | 2001.84 | 4394.74 | 4492.97 | 2192.77 |
| 19 |         |         |         |         |         |
| 20 | 253.10  | 1069.13 | 217.56  | 192.32  | 259.40  |
| 21 | 69.49   | 149.27  | 184.86  | 187.72  | 287.69  |
| 22 |         |         |         |         |         |
| 23 | 32.29   | 9.61    | 9.56    | 0.00    | 0.00    |
| 24 | 105.97  | 259.53  | 235.04  | 277.60  | 371.66  |
| 25 |         |         |         |         |         |
| 26 | 1377.46 | 1382.72 | 1764.59 | 1921.09 | 2273.61 |
| 27 | 1680.56 | 1528.23 | 1360.30 | 1325.43 | 1315.72 |
| 28 |         |         |         |         |         |
| 29 | 364.83  | 397.14  | 363.18  | 348.72  | 180.81  |
| 30 | 0.00    | 0.00    | 0.00    | 0.00    | 53.02   |
| 31 | 1536.74 | 1670.21 | 1450.75 | 1225.50 | 1356.09 |
| 32 |         |         |         |         |         |
| 33 | 425.05  | 473.53  | 409.89  | 803.19  | 822.43  |
| 34 |         |         |         |         |         |
| 35 | 1286.22 | 1487.70 | 1317.68 | 1159.13 | 1379.29 |
| 36 | 747.45  | 624.69  | 683.20  | 702.02  | 612.44  |
| 37 |         |         |         |         |         |
| 38 |         |         |         |         |         |
| 39 |         |         |         |         |         |
| 40 |         |         |         |         |         |
| 41 |         |         |         |         |         |
| 42 |         |         |         |         |         |
| 43 |         |         |         |         |         |

|    | 2014      | 2015      | 2016      | 2017      | 2018      |
|----|-----------|-----------|-----------|-----------|-----------|
| 45 | 41,185.25 | 22,206.14 | 53,806.97 | 52,012.07 | 51,267.85 |
| 46 | 40,524.64 | 46,419.54 | 51,536.02 | 42,143.03 | 51,819.50 |
| 47 |           |           |           |           |           |
| 48 |           |           |           |           |           |
| 49 | -         | -         | -         | -         | -         |
| 50 | -         | -         | -         | -         | -         |
| 51 |           |           |           |           |           |
| 52 | 48,550.81 | 50,058.20 | 50,023.45 | 43,057.15 | 49,844.10 |
| 53 | 46,968.31 | 46,996.62 | 52,290.82 | 38,789.72 | 50,126.54 |
| 54 | 48,828.05 | 47,004.14 | 49,949.88 | 53,580.95 | 47,608.35 |
| 55 | 50,866.76 | 51,604.00 | 53,138.11 | 44,414.33 | 52,772.74 |
| 56 | 51,593.74 | 50,206.15 | 46,141.36 | 39,228.53 | 53,399.28 |
| 57 | 43,772.59 | 50,110.74 | 44,605.21 | 50,347.79 | 54,572.93 |
| 58 |           |           |           |           |           |
| 59 |           |           |           |           |           |
| 60 | 48,100.07 | 46,307.61 | 53,640.56 | 38,726.83 | 48,278.64 |

|    |           |           |           |           |           |
|----|-----------|-----------|-----------|-----------|-----------|
| 1  |           |           |           |           |           |
| 2  | 43,986.03 | 49,096.43 | 50,778.89 | 33,887.30 | 55,106.16 |
| 3  | 48,427.87 | 45,050.76 | 42,201.00 | 44,781.09 | 52,228.74 |
| 4  |           |           |           |           |           |
| 5  | 52,961.30 | 38,157.60 | 63,962.22 | 57,204.53 | 54,791.47 |
| 6  | -         | -         | -         | -         | -         |
| 7  |           |           |           |           |           |
| 8  | 45,644.69 | 49,324.11 | 49,906.83 | 37,014.15 | 49,360.45 |
| 9  | 52,121.22 | 52,267.35 | 49,273.94 | 43,610.55 | 54,557.28 |
| 10 |           |           |           |           |           |
| 11 | 48,930.92 | 51,194.46 | 47,646.10 | 50,487.34 | 57,237.10 |
| 12 | 42,098.85 | 56,476.42 | 48,126.51 | 35,942.22 | 65,986.86 |
| 13 |           |           |           |           |           |
| 14 |           |           |           |           |           |

|    | 2014       | 2015       | 2016       | 2017       | 2018       |
|----|------------|------------|------------|------------|------------|
| 15 |            |            |            |            |            |
| 16 | 181,322.12 | 214,379.66 | 242,511.23 | 195,885.79 | 236,193.88 |
| 17 | 158,205.40 | 200,587.18 | 198,813.50 | 187,886.10 | 194,138.86 |
| 18 |            |            |            |            |            |
| 19 | -          | -          | -          | -          | -          |
| 20 |            |            |            |            |            |
| 21 | 281,263.65 | 352,425.98 | 308,097.80 | 222,369.87 | 309,838.80 |
| 22 | 298,711.97 | 318,202.74 | 325,995.98 | 242,099.93 | 322,879.15 |
| 23 | 296,529.36 | 290,561.75 | 308,001.23 | 259,090.85 | 278,990.40 |
| 24 | 189,173.60 | 325,327.21 | 337,645.62 | 249,705.78 | 506,219.15 |
| 25 | 225,536.22 | 209,320.82 | 226,543.08 | 150,984.84 | 211,951.64 |
| 26 | 218,571.46 | 220,370.39 | 198,794.11 | 127,006.57 | 164,533.48 |
| 27 | 218,562.00 | 225,250.86 | 222,176.42 | 208,723.20 | 199,470.82 |
| 28 | 248,131.86 | 247,013.92 | 233,002.38 | 136,474.40 | 229,071.03 |
| 29 | 322,209.47 | 336,699.57 | 318,735.63 | 256,743.17 | 328,025.85 |
| 30 | 235,460.77 | 254,433.12 | 271,096.59 | 227,099.14 | 295,829.76 |
| 31 | 266,139.76 | 292,796.58 | 232,794.12 | 193,833.32 | 229,328.70 |
| 32 |            |            |            |            |            |
| 33 | -          | -          | -          | -          | -          |
| 34 |            |            |            |            |            |
| 35 | 228,874.24 | 238,896.21 | 265,379.98 | 180,004.45 | 278,111.92 |
| 36 | 177,799.44 | 182,959.11 | 247,644.98 | 165,850.47 | 216,962.16 |
| 37 | 212,984.71 | 204,619.10 | 233,374.57 | 211,033.14 | 269,082.57 |
| 38 | 137,942.70 | 121,218.53 | 140,143.30 | 142,043.64 | 149,005.29 |
| 39 |            |            |            |            |            |
| 40 |            |            |            |            |            |
| 41 |            |            |            |            |            |
| 42 |            |            |            |            |            |
| 43 |            |            |            |            |            |
| 44 |            |            |            |            |            |
| 45 |            |            |            |            |            |
| 46 |            |            |            |            |            |
| 47 |            |            |            |            |            |
| 48 |            |            |            |            |            |
| 49 |            |            |            |            |            |

|    | 2014       | 2015       | 2016       | 2017       | 2018       |
|----|------------|------------|------------|------------|------------|
| 50 |            |            |            |            |            |
| 51 | 116,014.22 | 165,397.35 | 164,759.78 | 156,604.95 | 134,578.96 |
| 52 | 105,209.29 | 100,899.65 | 103,237.16 | 106,095.74 | 91,883.72  |
| 53 | 125,049.67 | 129,018.42 | -          | -          | 36,122.39  |
| 54 | 121,095.31 | 124,231.20 | 124,254.00 | 123,725.40 | 126,443.59 |
| 55 | 122,989.95 | 120,931.47 | 123,124.83 | 131,467.97 | 127,339.88 |
| 56 | 142,145.30 | 137,585.19 | 137,135.13 | 124,601.11 | 123,535.61 |
| 57 |            |            |            |            |            |
| 58 | -          | -          | 97,183.16  | -          | 141,422.49 |
| 59 |            |            |            |            |            |
| 60 |            |            |            |            |            |

|    |            |            |            |            |            |
|----|------------|------------|------------|------------|------------|
| 1  |            |            |            |            |            |
| 2  | 151,347.92 | 145,660.16 | 137,674.11 | 124,100.36 | 114,441.59 |
| 3  | 124,046.87 | -          | -          | 132,347.96 | 112,763.11 |
| 4  |            |            |            |            |            |
| 5  | 114,939.42 | 103,365.98 | 117,286.70 | 113,919.61 | 109,571.72 |
| 6  | 122,940.00 | -          | -          | -          | -          |
| 7  |            |            |            |            |            |
| 8  | 101,376.49 | 108,428.37 | 155,499.27 | 147,628.75 | 131,307.05 |
| 9  | 122,746.34 | 127,113.95 | 114,519.08 | 125,082.89 | 129,598.82 |
| 10 |            |            |            |            |            |
| 11 | 115,511.21 | 115,428.72 | 115,057.50 | 118,177.66 | 114,028.76 |
| 12 | -          | -          | -          | -          | -          |
| 13 |            |            |            |            |            |
| 14 | 144,217.80 | 139,416.05 | 140,949.26 | 136,394.47 | 139,621.27 |
| 15 | 135,424.44 | 114,259.62 | 127,826.75 | 129,739.70 | 120,575.17 |
| 16 |            |            |            |            |            |
| 17 | 119,692.33 | 126,591.56 | 132,630.34 | 145,903.03 | 157,335.55 |
| 18 | 130,065.58 | 137,244.16 | 137,675.96 | 128,527.40 | 124,770.27 |
| 19 |            |            |            |            |            |
| 20 |            |            |            |            |            |

|    | 2014       | 2015       | 2016       | 2017       | 2018       |
|----|------------|------------|------------|------------|------------|
| 21 |            |            |            |            |            |
| 22 |            |            |            |            |            |
| 23 | 143,492.28 | 152,550.32 | 159,119.06 | 151,658.85 | 160,835.29 |
| 24 | 102,456.87 | 112,335.80 | 149,539.43 | 127,492.55 | 145,874.29 |
| 25 |            |            |            |            |            |
| 26 | 140,184.25 | 139,465.34 | 144,618.95 | 147,890.79 | 142,995.52 |
| 27 | 130,239.65 | 138,606.69 | 135,272.54 | 153,165.18 | 149,676.86 |
| 28 |            |            |            |            |            |
| 29 | 134,971.28 | 131,365.86 | 143,109.16 | 148,378.04 | 147,625.63 |
| 30 | 165,970.51 | 146,706.44 | 152,241.75 | 167,097.87 | 168,960.69 |
| 31 |            |            |            |            |            |
| 32 | 155,821.28 | 140,951.42 | 144,351.32 | 144,670.04 | 162,632.68 |
| 33 | 113,207.69 | 113,998.57 | 115,559.46 | 152,107.91 | 161,625.86 |
| 34 |            |            |            |            |            |
| 35 | 201,423.04 | 190,526.09 | 180,056.21 | 185,725.63 | 174,189.34 |
| 36 | 103,548.51 | 113,408.83 | 161,557.27 | 156,354.94 | 131,238.11 |
| 37 |            |            |            |            |            |
| 38 | 173,451.62 | 176,569.45 | 174,524.21 | 170,544.46 | 172,203.30 |
| 39 | 139,303.30 | 133,412.03 | 151,862.14 | 138,640.16 | 148,913.91 |
| 40 | 136,102.75 | 133,121.89 | 136,804.50 | 147,383.02 | 148,812.28 |
| 41 |            |            |            |            |            |
| 42 | -          | -          | -          | -          | 152,380.97 |
| 43 | -          | -          | -          | -          | -          |
| 44 |            |            |            |            |            |
| 45 | 152,099.55 | 157,498.60 | 157,107.03 | 155,465.92 | 143,195.04 |
| 46 | 144,259.80 | 129,666.89 | 159,300.23 | 161,730.23 | 181,155.52 |
| 47 |            |            |            |            |            |
| 48 | 135,166.64 | 133,417.74 | -          | 148,242.33 | 148,435.61 |
| 49 | 143,306.00 | 154,772.53 | 152,968.67 | 153,737.93 | 147,866.65 |
| 50 |            |            |            |            |            |
| 51 |            |            |            |            |            |
|    | 2014       | 2015       | 2016       | 2017       | 2018       |
| 52 |            |            |            |            |            |
| 53 |            |            |            |            |            |
| 54 | 148,123.81 | 144,443.08 | 142,689.21 | 157,555.12 | 159,846.55 |
| 55 | 116,374.47 | 80,169.46  | 155,064.66 | 158,091.68 | 135,011.74 |
| 56 |            |            |            |            |            |
| 57 | 145,808.38 | 138,023.31 | 151,985.43 | 162,035.47 | 156,231.37 |
| 58 | 138,631.04 | 100,981.12 | 135,667.55 | 147,222.61 | 142,664.37 |
| 59 | 140,400.99 | 137,548.15 | 153,626.58 | 159,586.71 | 158,975.82 |
| 60 | 158,596.97 | 155,263.02 | 151,669.37 | 166,412.01 | 157,056.23 |

|    |            |            |            |            |            |
|----|------------|------------|------------|------------|------------|
| 1  |            |            |            |            |            |
| 2  | 164,338.59 | 157,069.93 | 134,928.19 | 167,310.69 | 163,676.56 |
| 3  | 114,511.43 | 108,485.52 | 120,231.04 | 148,887.44 | 150,578.68 |
| 4  |            |            |            |            |            |
| 5  | 192,491.56 | 193,737.24 | 188,760.85 | 198,016.91 | 172,151.37 |
| 6  | 100,281.36 | 90,965.11  | 160,765.03 | 157,890.07 | 109,642.35 |
| 7  |            |            |            |            |            |
| 8  | 199,881.18 | 202,573.86 | 180,798.34 | 184,810.00 | 180,423.82 |
| 9  | 127,762.92 | 129,617.97 | 127,076.54 | 133,079.84 | 126,822.03 |
| 10 |            |            |            |            |            |
| 11 | 128,747.84 | 129,930.85 | 146,325.32 | 159,585.62 | 156,852.71 |
| 12 | 129,158.14 | 135,613.19 | 114,208.49 | 150,712.78 | 120,312.95 |
| 13 |            |            |            |            |            |
| 14 | -          | -          | -          | -          | -          |
| 15 | 153,997.22 | 146,351.94 | 152,801.23 | 161,590.69 | 154,874.24 |
| 16 | 153,833.18 | 151,190.88 | 161,046.12 | 164,639.72 | 160,041.70 |
| 17 | 135,176.38 | 137,446.57 | 179,925.96 | 163,030.76 | 163,112.85 |
| 18 | 146,765.39 | 140,859.48 | 134,846.46 | 142,194.67 | 128,536.59 |
| 19 |            |            |            |            |            |
| 20 |            |            |            |            |            |
| 21 |            |            |            |            |            |
| 22 |            |            |            |            |            |
| 23 |            |            |            |            |            |
| 24 |            |            |            |            |            |
| 25 |            |            |            |            |            |
| 26 |            |            |            |            |            |
| 27 |            |            |            |            |            |

|    | 2014       | 2015       | 2016       | 2017       | 2018       |
|----|------------|------------|------------|------------|------------|
| 28 |            |            |            |            |            |
| 29 | 367,365.36 | 372,103.40 | 377,286.45 | 371,473.96 | 375,212.61 |
| 30 | 321,178.38 | 320,949.86 | 351,260.26 | 342,829.50 | 357,997.12 |
| 31 | 444,908.42 | 398,793.51 | 452,308.12 | 463,444.07 | 439,788.37 |
| 32 | 469,189.80 | 473,523.94 | 505,791.14 | 505,832.55 | 535,233.47 |
| 33 | 395,830.24 | 397,546.97 | 412,151.14 | 420,050.37 | 424,825.67 |
| 34 | 393,748.00 | 388,989.83 | 422,075.58 | 457,285.95 | 469,607.33 |
| 35 | 344,002.11 | 355,754.70 | 364,461.35 | 361,780.28 | 361,410.38 |
| 36 | 346,751.96 | 369,466.55 | 384,163.85 | 388,483.11 | 411,823.00 |
| 37 | 398,193.92 | 386,367.86 | 392,972.68 | 376,958.08 | 370,220.44 |
| 38 | 339,251.27 | 325,378.65 | 333,789.93 | 343,163.00 | 350,600.83 |
| 39 | 350,324.79 | 361,723.07 | 376,118.87 | 405,045.84 | 393,402.24 |
| 40 | 341,911.73 | 353,254.98 | 366,332.75 | 382,251.80 | 383,782.64 |
| 41 | 400,388.83 | 410,849.89 | 404,928.82 | 401,762.75 | 403,088.82 |
| 42 | 385,788.10 | 376,038.79 | 387,322.03 | 428,192.15 | 401,541.80 |
| 43 | 285,482.24 | -          |            | 303,736.41 | -          |
| 44 | 443,499.29 | 456,044.31 | 473,322.91 | 479,528.20 | 489,512.50 |
| 45 | 384,771.39 | 393,455.28 | 429,769.25 | 445,032.31 | 431,055.71 |
| 46 | 354,571.76 | 371,085.36 | 384,810.07 | 386,724.04 | 382,141.29 |
| 47 | 289,331.59 | 322,216.70 | 318,551.12 | 347,247.05 | 358,473.27 |
| 48 |            |            |            |            |            |
| 49 |            |            |            |            |            |
| 50 |            |            |            |            |            |
| 51 |            |            |            |            |            |
| 52 |            |            |            |            |            |
| 53 |            |            |            |            |            |
| 54 |            |            |            |            |            |
| 55 |            |            |            |            |            |
| 56 |            |            |            |            |            |
| 57 |            |            |            |            |            |
| 58 | 84,017.17  | 75,429.88  | 71,480.32  | 58,737.26  | 75,584.03  |
| 59 | 75,244.84  | 73,649.09  | 72,635.56  | 69,762.95  | 69,083.31  |
| 60 |            |            |            |            |            |

|    |            |            |            |            |            |
|----|------------|------------|------------|------------|------------|
| 1  |            |            |            |            |            |
| 2  | 107,848.74 | 97,114.76  | 96,360.13  | 82,323.19  | 78,133.72  |
| 3  | 68,651.13  | 66,942.68  | 75,605.83  | 70,902.06  | 79,827.13  |
| 4  | 82,042.34  | 82,431.70  | 81,507.39  | 78,551.71  | 74,768.19  |
| 5  | 82,886.56  | 90,480.21  | 97,890.79  | 83,919.23  | 70,391.74  |
| 6  | 73,204.13  | 79,341.58  | 82,937.56  | 73,735.26  | 71,734.86  |
| 7  | 63,352.93  | 69,822.28  | 84,646.40  | 80,887.67  | 72,830.42  |
| 8  | 92,534.69  | 84,567.48  | 75,141.62  | 107,321.72 | 86,395.89  |
| 9  | 80,406.44  | 76,513.21  | 66,301.41  | 70,452.57  | 106,769.91 |
| 10 | 124,153.58 | 126,000.60 | 130,229.52 | 136,497.55 | 116,777.31 |
| 11 | 68,666.35  | 77,392.03  | 75,908.40  | 78,497.52  | 76,319.46  |
| 12 | 72,484.85  | 83,137.75  | 86,506.00  | 80,820.54  | 82,820.37  |
| 13 | 81,122.40  | 77,189.56  | 73,338.04  | 52,331.37  | 109,364.28 |
| 14 | -          | -          | 71,430.92  | 70,750.30  | -          |
| 15 | 102,500.49 | 99,144.09  | 90,697.31  | 82,959.61  | 81,944.08  |
| 16 | 76,670.88  | 68,786.74  | 74,883.93  | 76,912.20  | 78,129.34  |
| 17 | 87,045.40  | 74,067.99  | 78,974.71  | 77,120.89  | 76,440.09  |
| 18 | 84,104.04  | 88,137.64  | 92,722.60  | 73,826.41  | 75,485.07  |
| 19 |            |            |            |            |            |
| 20 |            |            |            |            |            |
| 21 | 227,404.47 | 200,997.51 | 206,539.82 | 185,963.52 | 183,131.22 |
| 22 | 177,596.79 | 164,533.46 | 191,266.96 | 188,405.62 | 178,910.47 |
| 23 | 214,702.63 | 165,345.81 | 159,447.36 | 137,506.78 | 152,229.73 |
| 24 | 185,059.36 | 182,095.22 | 163,078.37 | 158,560.52 | 182,759.01 |
| 25 | 190,436.38 | 183,320.81 | 187,586.60 | 186,088.30 | 181,438.49 |
| 26 | 192,809.52 | 197,610.15 | 198,781.13 | 194,088.16 | 186,551.52 |
| 27 | 217,634.98 | 194,780.34 | 203,270.98 | 193,051.22 | 190,852.25 |
| 28 | 185,052.17 | 204,500.31 | 182,826.80 | 193,086.49 | 182,872.21 |
| 29 | 184,079.36 | 208,683.00 | 181,769.25 | 187,653.23 | 187,180.69 |
| 30 | 169,433.87 | 168,240.81 | 169,042.58 | 180,537.28 | 175,006.27 |
| 31 | 170,963.06 | 182,340.75 | 194,486.64 | 180,664.88 | 150,338.73 |
| 32 | 194,917.40 | 192,994.85 | 185,421.13 | 186,786.00 | 185,433.89 |
| 33 | 193,571.46 | 191,398.95 | 188,401.01 | 185,928.70 | 186,413.64 |
| 34 | 174,932.36 | 163,765.26 | 203,958.38 | 194,334.70 | 187,609.65 |
| 35 | -          | -          | -          | -          | -          |
| 36 | 192,231.21 | 190,774.89 | 191,336.63 | 188,751.61 | 185,346.70 |
| 37 | 194,914.18 | 197,087.66 | 188,837.85 | 180,186.38 | 180,795.24 |
| 38 | 201,760.59 | 193,453.92 | 182,411.94 | 181,326.04 | 174,811.03 |
| 39 | 174,924.51 | 168,588.02 | 175,786.12 | 178,333.51 | 176,252.95 |
| 40 |            |            |            |            |            |
| 41 |            |            |            |            |            |
| 42 |            |            |            |            |            |
| 43 |            |            |            |            |            |
| 44 |            |            |            |            |            |
| 45 |            |            |            |            |            |
| 46 |            |            |            |            |            |
| 47 |            |            |            |            |            |
| 48 |            |            |            |            |            |
| 49 |            |            |            |            |            |
| 50 |            |            |            |            |            |
| 51 |            |            |            |            |            |
| 52 |            |            |            |            |            |
| 53 |            |            |            |            |            |
| 54 |            |            |            |            |            |
| 55 |            |            |            |            |            |
| 56 |            |            |            |            |            |
| 57 |            |            |            |            |            |
| 58 | 945,724.67 | -          | -          | -          | -          |
| 59 | 592,466.97 | 757,483.53 | 574,456.67 | 542,459.47 | 586,425.88 |
| 60 | -          | -          | -          | -          | -          |

|    |              |              |              |              |              |
|----|--------------|--------------|--------------|--------------|--------------|
| 1  |              |              |              |              |              |
| 2  | 112,376.69   | 111,113.20   | 110,179.42   | 1,366,612.43 | 1,453,323.09 |
| 3  | 1,509,296.79 | 1,297,026.24 | 1,246,775.74 | 1,285,632.16 | 1,148,667.15 |
| 4  | 876,055.05   | 893,345.06   | 902,523.31   | 832,643.36   | 823,544.55   |
| 5  | 846,229.01   | 817,777.77   | 591,938.78   | 569,802.22   | 545,506.29   |
| 6  | 1,696,340.57 | 1,082,384.97 | 890,862.35   | -            | 735,312.71   |
| 7  | 563,833.79   | 556,571.32   | 582,034.74   | 572,489.23   | 504,399.22   |
| 8  | 581,173.22   | 572,321.11   | 652,563.23   | 635,195.46   | 616,118.10   |
| 9  | 526,787.56   | 467,016.62   | 425,292.66   | 560,509.21   | 1,631,317.32 |
| 10 | 1,490,722.21 | 1,261,168.67 | 1,587,314.77 | 1,298,750.47 | 627,466.95   |
| 11 | 897,094.64   | 882,163.23   | 768,191.98   | 818,584.81   | 811,639.11   |
| 12 | -            | -            | -            | -            | -            |
| 13 | -            | -            | -            | -            | -            |
| 14 | 1,020,431.69 | 901,680.15   | 1,040,822.76 | 966,626.44   | 945,858.60   |
| 15 | 801,375.66   | 1,382,334.82 | 903,348.75   | 809,123.36   | 768,482.94   |
| 16 | 1,259,282.59 | 1,478,765.65 | 1,238,364.51 | 1,714,831.54 | 1,129,595.03 |
| 17 | 836,291.03   | 832,850.00   | 652,656.83   | -            | -            |
| 18 |              |              |              |              |              |
| 19 | 549,917.43   | 616,920.28   | 747,471.08   | 589,376.88   | 497,226.49   |
| 20 | 353,004.26   | 477,211.28   | 510,081.54   | 580,102.92   | 528,815.23   |
| 21 | 474,473.64   | 515,567.73   | 613,255.62   | 1,470,539.96 | 2,812,609.16 |
| 22 | 845,692.79   | 737,668.24   | 596,727.25   | 439,203.77   | 525,069.30   |
| 23 | -            | 829,588.81   | 796,841.17   | 814,187.67   | 762,910.14   |
| 24 | 1,387,875.19 | 1,080,370.22 | 1,044,841.44 | 1,034,898.55 | 1,422,741.62 |
| 25 | 2,032,347.11 | 823,215.61   | 885,214.02   | 994,025.15   | 588,864.11   |
| 26 | 801,233.56   | 1,928,204.06 | 695,655.37   | 500,714.10   | 911,964.69   |
| 27 | 256,486.82   | 555,080.37   | 691,556.53   | 588,725.30   | 548,463.97   |
| 28 | 310,965.29   | 183,964.61   | 182,454.99   | -            | -            |
| 29 | 248,105.09   | 814,149.08   | 741,798.35   | 661,086.47   | 717,412.55   |
| 30 | 563,422.64   | 633,475.50   | 720,311.00   | 770,776.38   | 827,657.53   |
| 31 | 796,901.07   | 709,186.93   | 765,845.53   | 710,564.11   | 712,003.28   |
| 32 | 470,894.67   | 454,927.41   | 672,136.60   | 651,615.18   | 287,938.96   |
| 33 | -            | -            | -            | -            | 383,326.08   |
| 34 | 678,263.67   | 606,028.03   | 663,683.35   | 624,271.62   | 593,266.48   |
| 35 | 624,347.91   | 538,040.35   | 554,617.33   | 800,094.49   | 617,905.69   |
| 36 | 690,195.05   | 736,673.40   | 705,042.78   | 558,208.29   | 553,968.28   |
| 37 | 365,859.36   | 360,411.99   | 421,219.43   | 366,563.96   | 473,981.64   |
| 38 |              |              |              |              |              |
| 39 |              |              |              |              |              |
| 40 |              |              |              |              |              |
| 41 |              |              |              |              |              |
| 42 |              |              |              |              |              |
| 43 |              |              |              |              |              |
| 44 |              |              |              |              |              |
| 45 |              |              |              |              |              |
| 46 |              |              |              |              |              |
| 47 |              |              |              |              |              |
| 48 |              |              |              |              |              |
| 49 |              |              |              |              |              |
| 50 |              |              |              |              |              |
| 51 |              |              |              |              |              |
| 52 |              |              |              |              |              |
| 53 |              |              |              |              |              |
| 54 |              |              |              |              |              |
| 55 |              |              |              |              |              |
| 56 |              |              |              |              |              |
| 57 |              |              |              |              |              |
| 58 |              |              |              |              |              |
| 59 |              |              |              |              |              |
| 60 |              |              |              |              |              |

1  
2  
3  
4  
5  
6  
7  
8  
9  
10  
11  
12  
13  
14  
15  
16  
17  
18  
19  
20  
21  
22  
23  
24  
25  
26  
27  
28  
29  
30  
31  
32  
33  
34  
35  
36  
37  
38  
39  
40  
41  
42  
43  
44  
45  
46  
47  
48  
49  
50  
51  
52  
53  
54  
55  
56  
57  
58  
59  
60

For peer review only



1  
2  
3  
4  
5  
6  
7  
8  
9  
10  
11  
12  
13  
14  
15  
16  
17  
18  
19  
20  
21  
22  
23  
24  
25  
26  
27  
28  
29  
30  
31  
32  
33  
34  
35  
36  
37  
38  
39  
40  
41  
42  
43  
44  
45  
46  
47  
48  
49  
50  
51  
52  
53  
54  
55  
56  
57  
58  
59  
60

For peer review only

1  
2  
3  
4  
5  
6  
7  
8  
9  
10  
11  
12  
13  
14  
15  
16  
17  
18  
19  
20  
21  
22  
23  
24  
25  
26  
27  
28  
29  
30  
31  
32  
33  
34  
35  
36  
37  
38  
39  
40  
41  
42  
43  
44  
45  
46  
47  
48  
49  
50  
51  
52  
53  
54  
55  
56  
57  
58  
59  
60

For peer review only

1  
2  
3  
4  
5  
6  
7  
8  
9  
10  
11  
12  
13  
14  
15  
16  
17  
18  
19  
20  
21  
22  
23  
24  
25  
26  
27  
28  
29  
30  
31  
32  
33  
34  
35  
36  
37  
38  
39  
40  
41  
42  
43  
44  
45  
46  
47  
48  
49  
50  
51  
52  
53  
54  
55  
56  
57  
58  
59  
60

For peer review only

1  
2  
3  
4  
5  
6  
7  
8  
9  
10  
11  
12  
13  
14  
15  
16  
17  
18  
19  
20  
21  
22  
23  
24  
25  
26  
27  
28  
29  
30  
31  
32  
33  
34  
35  
36  
37  
38  
39  
40  
41  
42  
43  
44  
45  
46  
47  
48  
49  
50  
51  
52  
53  
54  
55  
56  
57  
58  
59  
60

For peer review only

1  
2  
3  
4  
5  
6  
7  
8  
9  
10  
11  
12  
13  
14  
15  
16  
17  
18  
19  
20  
21  
22  
23  
24  
25  
26  
27  
28  
29  
30  
31  
32  
33  
34  
35  
36  
37  
38  
39  
40  
41  
42  
43  
44  
45  
46  
47  
48  
49  
50  
51  
52  
53  
54  
55  
56  
57  
58  
59  
60

For peer review only

1  
2  
3  
4  
5  
6  
7  
8  
9  
10  
11  
12  
13  
14  
15  
16  
17  
18  
19  
20  
21  
22  
23  
24  
25  
26  
27  
28  
29  
30  
31  
32  
33  
34  
35  
36  
37  
38  
39  
40  
41  
42  
43  
44  
45  
46  
47  
48  
49  
50  
51  
52  
53  
54  
55  
56  
57  
58  
59  
60

For peer review only

1  
2  
3  
4  
5  
6  
7  
8  
9  
10  
11  
12  
13  
14  
15  
16  
17  
18  
19  
20  
21  
22  
23  
24  
25  
26  
27  
28  
29  
30  
31  
32  
33  
34  
35  
36  
37  
38  
39  
40  
41  
42  
43  
44  
45  
46  
47  
48  
49  
50  
51  
52  
53  
54  
55  
56  
57  
58  
59  
60

For peer review only

1  
2  
3  
4  
5  
6  
7  
8  
9  
10  
11  
12  
13  
14  
15  
16  
17  
18  
19  
20  
21  
22  
23  
24  
25  
26  
27  
28  
29  
30  
31  
32  
33  
34  
35  
36  
37  
38  
39  
40  
41  
42  
43  
44  
45  
46  
47  
48  
49  
50  
51  
52  
53  
54  
55  
56  
57  
58  
59  
60

For peer review only



1  
2  
3  
4  
5  
6  
7  
8  
9  
10  
11  
12  
13  
14  
15  
16  
17  
18  
19  
20  
21  
22  
23  
24  
25  
26  
27  
28  
29  
30  
31  
32  
33  
34  
35  
36  
37  
38  
39  
40  
41  
42  
43  
44  
45  
46  
47  
48  
49  
50  
51  
52  
53  
54  
55  
56  
57  
58  
59  
60

For peer review only

1  
2  
3  
4  
5  
6  
7  
8  
9  
10  
11  
12  
13  
14  
15  
16  
17  
18  
19  
20  
21  
22  
23  
24  
25  
26  
27  
28  
29  
30  
31  
32  
33  
34  
35  
36  
37  
38  
39  
40  
41  
42  
43  
44  
45  
46  
47  
48  
49  
50  
51  
52  
53  
54  
55  
56  
57  
58  
59  
60

For peer review only

|    | 0.874       | 0.862       |
|----|-------------|-------------|
|    | <b>2019</b> | <b>2020</b> |
| 1  |             |             |
| 2  |             |             |
| 3  |             |             |
| 4  |             |             |
| 5  |             |             |
| 6  | 107         | 336         |
| 7  |             |             |
| 8  | 58          | 171         |
| 9  | 0           | 56          |
| 10 |             |             |
| 11 | 0           | 0           |
| 12 | 5827        | 6638        |
| 13 |             |             |
| 14 | 1384        | 1201        |
| 15 | 387         | 626         |
| 16 |             |             |
| 17 | 271         | 262         |
| 18 | 465         | 489         |
| 19 |             |             |
| 20 | 390         | 406         |
| 21 | 437         | 374         |
| 22 |             |             |
| 23 | 856         | 626         |
| 24 | 1012        | 575         |
| 25 |             |             |
| 26 | 172         | 118         |
| 27 | 62          | 0           |
| 28 |             |             |
| 29 | 1485        | 1742        |
| 30 | 235         | 393         |
| 31 | 881         | 941         |
| 32 |             |             |
| 33 | 58          | 69          |
| 34 |             |             |
| 35 |             |             |
| 36 |             |             |
| 37 | 4440        | 3876        |
| 38 |             |             |
| 39 | 1710        | 1754        |
| 40 | 800         | 630         |
| 41 |             |             |
| 42 | 1286        | 1509        |
| 43 | 117542      | 120064      |
| 44 |             |             |
| 45 | 7943        | 9935        |
| 46 | 3208        | 3457        |
| 47 |             |             |
| 48 | 1539        | 2468        |
| 49 | 4253        | 4097        |
| 50 |             |             |
| 51 | 1463        | 1787        |
| 52 | 3742        | 4166        |
| 53 |             |             |
| 54 | 19922       | 17397       |
| 55 | 21881       | 22231       |
| 56 |             |             |
| 57 | 1103        | 1384        |
| 58 | 0           | 0           |
| 59 | 19832       | 22480       |
| 60 | 6789        | 5724        |

|    |             |             |
|----|-------------|-------------|
| 1  |             |             |
| 2  | 15605       | 14175       |
| 3  |             |             |
| 4  | 864         | 997         |
| 5  |             |             |
| 6  |             |             |
| 7  |             |             |
| 8  |             |             |
| 9  |             |             |
| 10 | <b>2019</b> | <b>2020</b> |
| 11 |             |             |
| 12 | 572         | 854         |
| 13 | 900         | 810         |
| 14 |             |             |
| 15 | 107         | 213         |
| 16 | 1019        | 1795        |
| 17 |             |             |
| 18 | 21286       | 21356       |
| 19 | 2606        | 2021        |
| 20 |             |             |
| 21 | 397         | 283         |
| 22 | 895         | 960         |
| 23 |             |             |
| 24 | 227         | 125         |
| 25 | 612         | 507         |
| 26 |             |             |
| 27 | 0           | 112         |
| 28 | 1810        | 2383        |
| 29 |             |             |
| 30 | 3016        | 3097        |
| 31 | 1167        | 1302        |
| 32 |             |             |
| 33 | 0           | 0           |
| 34 | 9698        | 10535       |
| 35 | 1687        | 1304        |
| 36 |             |             |
| 37 | 1200        | 872         |
| 38 |             |             |
| 39 | 611         | 749         |
| 40 |             |             |
| 41 | <b>2019</b> | <b>2020</b> |
| 42 |             |             |
| 43 | 3945        | 3431        |
| 44 | 1761        | 1404        |
| 45 |             |             |
| 46 | 972         | 966         |
| 47 | 450         | 435         |
| 48 |             |             |
| 49 | 40718       | 40627       |
| 50 | 5700        | 6372        |
| 51 |             |             |
| 52 | 2070        | 1556        |
| 53 | 970         | 1444        |
| 54 |             |             |
| 55 | 4415        | 4205        |
| 56 | 740         | 854         |
| 57 |             |             |
| 58 | 1893        | 1621        |
| 59 | 4123        | 4505        |
| 60 | 16945       | 16185       |

|    |             |             |
|----|-------------|-------------|
| 1  |             |             |
| 2  | 149         | 148         |
| 3  | 0           | 0           |
| 4  |             |             |
| 5  | 2844        | 3674        |
| 6  | 2523        | 3239        |
| 7  |             |             |
| 8  | 6686        | 7174        |
| 9  | 971         | 947         |
| 10 |             |             |
| 11 |             |             |
| 12 | <b>2019</b> | <b>2020</b> |
| 13 |             |             |
| 14 | 2685        | 2567        |
| 15 | 1360        | 1154        |
| 16 |             |             |
| 17 | 3127        | 2233        |
| 18 | 860         | 948         |
| 19 |             |             |
| 20 | 39270       | 43310       |
| 21 | 8999        | 9082        |
| 22 |             |             |
| 23 | 810         | 968         |
| 24 | 1515        | 1754        |
| 25 |             |             |
| 26 | 3942        | 3650        |
| 27 | 432         | 472         |
| 28 |             |             |
| 29 | 2007        | 1572        |
| 30 | 166         | 455         |
| 31 |             |             |
| 32 | 16445       | 19211       |
| 33 | 397         | 381         |
| 34 | 0           | 0           |
| 35 |             |             |
| 36 | 16903       | 16934       |
| 37 | 171         | 498         |
| 38 |             |             |
| 39 | 1359        | 1936        |
| 40 | 441         | 434         |
| 41 |             |             |
| 42 |             |             |
| 43 |             |             |
| 44 |             |             |
| 45 |             |             |
| 46 | <b>2019</b> | <b>2020</b> |
| 47 |             |             |
| 48 | 96611       | 104140      |
| 49 | 44127       | 42831       |
| 50 |             |             |
| 51 | 27136       | 35028       |
| 52 | 40184       | 45344       |
| 53 |             |             |
| 54 | 1437753     | 1546304     |
| 55 | 303824      | 359201      |
| 56 | 74685       | 84467       |
| 57 |             |             |
| 58 | 85026       | 99370       |
| 59 | 162779      | 171439      |
| 60 | 53138       | 60475       |

|    |        |        |
|----|--------|--------|
| 1  |        |        |
| 2  | 80151  | 78570  |
| 3  |        |        |
| 4  | 314643 | 333831 |
| 5  | 301090 | 339631 |
| 6  | 24854  | 26515  |
| 7  |        |        |
| 8  | 248    | 0      |
| 9  | 446119 | 47072  |
| 10 |        |        |
| 11 | 266650 | 268941 |
| 12 | 176785 | 197789 |
| 13 |        |        |
| 14 | 21968  | 24401  |
| 15 |        |        |

|    | 2019    | 2020    |
|----|---------|---------|
| 16 |         |         |
| 17 |         |         |
| 18 | 692128  | 540973  |
| 19 |         |         |
| 20 | 340643  | 444365  |
| 21 | 170131  | 297712  |
| 22 |         |         |
| 23 | 482712  | 356016  |
| 24 | 9971038 | 1123091 |
| 25 |         |         |
| 26 | 1341851 | 1260427 |
| 27 | 139992  | 487505  |
| 28 | 982384  | 659251  |
| 29 |         |         |
| 30 | 281707  | 284470  |
| 31 | 645653  | 545684  |
| 32 |         |         |
| 33 | 279928  | 409354  |
| 34 |         |         |
| 35 | 2122323 | 2346227 |
| 36 | 280869  | 319452  |
| 37 | 733021  | 625866  |
| 38 |         |         |
| 39 | 0       | 0       |
| 40 | 1646860 | 1551283 |
| 41 |         |         |
| 42 | 1945683 | 183410  |
| 43 | 89468   | 1406835 |
| 44 |         |         |
| 45 | 249191  | 329822  |
| 46 |         |         |
| 47 |         |         |
|    | 2019    | 2020    |
| 48 |         |         |
| 49 | 7901    | 6260    |
| 50 |         |         |
| 51 | 2771    | 3712    |
| 52 | 1399    | 1056    |
| 53 |         |         |
| 54 | 2401    | 2819    |
| 55 | 67654   | 73204   |
| 56 |         |         |
| 57 | 22544   | 17368   |
| 58 | 10260   | 8724    |
| 59 | 5485    | 8536    |
| 60 | 10024   | 9669    |

|    |             |             |
|----|-------------|-------------|
| 1  |             |             |
| 2  | 4226        | 4408        |
| 3  | 4890        | 5890        |
| 4  |             |             |
| 5  | 21012       | 22186       |
| 6  | 23920       | 26148       |
| 7  |             |             |
| 8  | 2480        | 2118        |
| 9  | 0           | 0           |
| 10 |             |             |
| 11 | 29290       | 33837       |
| 12 | 19107       | 21432       |
| 13 |             |             |
| 14 | 9015        | 10752       |
| 15 | 1327        | 1937        |
| 16 |             |             |
| 17 |             |             |
| 18 | <b>2019</b> | <b>2020</b> |
| 19 |             |             |
| 20 | 0           | 0           |
| 21 | 2710        | 2680        |
| 22 |             |             |
| 23 | 0           | 0           |
| 24 | 1768        | 1998        |
| 25 |             |             |
| 26 | 396488      | 423422      |
| 27 | 18437       | 42257       |
| 28 |             |             |
| 29 | 610         | 0           |
| 30 | 2540        | 4457        |
| 31 |             |             |
| 32 | 15365       | 14842       |
| 33 | 3963        | 3888        |
| 34 |             |             |
| 35 | 4481        | 6622        |
| 36 | 11233       | 14118       |
| 37 |             |             |
| 38 | 10204       | 14790       |
| 39 | 0           | 0           |
| 40 |             |             |
| 41 | 0           | 0           |
| 42 | 7611        | 8414        |
| 43 |             |             |
| 44 | 9878        | 11119       |
| 45 | 26055       | 36847       |
| 46 |             |             |
| 47 | 0           | 0           |
| 48 |             |             |
| 49 | <b>2019</b> | <b>2020</b> |
| 50 |             |             |
| 51 | 9982        | 8843        |
| 52 | 7142        | 4542        |
| 53 |             |             |
| 54 | 1724        | 12315       |
| 55 | 8711        | 6972        |
| 56 |             |             |
| 57 | 538414      | 601801      |
| 58 | 89879       | 120052      |
| 59 |             |             |
| 60 | 5976        | 4821        |
|    | 7021        | 7298        |

|    |       |       |
|----|-------|-------|
| 1  |       |       |
| 2  | 5948  | 6846  |
| 3  | 616   | 559   |
| 4  | 1879  | 2681  |
| 5  | 26126 | 27745 |
| 6  | 72298 | 63706 |
| 7  | 4439  | 6730  |
| 8  | 376   | 371   |
| 9  | 80985 | 68057 |
| 10 | 34595 | 33086 |
| 11 | 35093 | 28211 |
| 12 | 9275  | 4447  |
| 13 |       |       |
| 14 |       |       |
| 15 |       |       |
| 16 |       |       |
| 17 |       |       |
| 18 |       |       |
| 19 |       |       |
| 20 |       |       |
| 21 |       |       |
| 22 |       |       |
| 23 |       |       |
| 24 |       |       |

|    | 2019   | 2020   |
|----|--------|--------|
| 25 |        |        |
| 26 | 2.52   | 7.96   |
| 27 | 4.61   | 13.61  |
| 28 | 0.00   | 1.24   |
| 29 | 0.00   | 0.00   |
| 30 | 48.48  | 55.24  |
| 31 | 97.82  | 84.93  |
| 32 | 67.25  | 108.94 |
| 33 | 6.34   | 6.14   |
| 34 | 24.08  | 25.32  |
| 35 | 20.45  | 21.30  |
| 36 | 44.64  | 38.30  |
| 37 | 67.69  | 49.49  |
| 38 | 16.69  | 9.49   |
| 39 | 17.63  | 12.08  |
| 40 | 8.42   | 0.00   |
| 41 | 38.27  | 44.93  |
| 42 | 5.70   | 9.52   |
| 43 | 34.45  | 36.79  |
| 44 | 5.62   | 6.79   |
| 45 |        |        |
| 46 |        |        |
| 47 |        |        |
| 48 |        |        |
| 49 |        |        |
| 50 |        |        |
| 51 |        |        |
| 52 |        |        |
| 53 |        |        |
| 54 |        |        |
| 55 |        |        |
| 56 |        |        |
| 57 | 105.07 | 91.71  |
| 58 | 136.59 | 140.20 |
| 59 | 17.71  | 13.94  |
| 60 |        |        |



|    |         |         |
|----|---------|---------|
| 1  |         |         |
| 2  | 10.88   | 12.76   |
| 3  |         |         |
| 4  | 978.12  | 999.11  |
| 5  | 561.45  | 702.30  |
| 6  |         |         |
| 7  | 557.96  | 601.52  |
| 8  | 36.03   | 57.79   |
| 9  |         |         |
| 10 | 220.25  | 212.14  |
| 11 | 76.73   | 93.74   |
| 12 |         |         |
| 13 | 382.76  | 426.07  |
| 14 | 1575.75 | 1376.06 |
| 15 |         |         |
| 16 | 360.96  | 366.74  |
| 17 | 112.95  | 141.63  |
| 18 | 0.00    | 0.00    |
| 19 |         |         |
| 20 | 511.25  | 579.51  |
| 21 | 164.39  | 138.59  |
| 22 |         |         |
| 23 | 610.37  | 554.44  |
| 24 | 84.68   | 97.69   |
| 25 |         |         |
| 26 |         |         |
| 27 |         |         |
| 28 |         |         |
| 29 |         |         |

|    | 2019   | 2020   |
|----|--------|--------|
| 30 |        |        |
| 31 | 13.54  | 20.20  |
| 32 |        |        |
| 33 | 71.88  | 64.75  |
| 34 | 2.38   | 4.72   |
| 35 |        |        |
| 36 | 8.63   | 15.19  |
| 37 | 177.13 | 177.71 |
| 38 |        |        |
| 39 | 184.22 | 142.87 |
| 40 | 69.00  | 49.21  |
| 41 |        |        |
| 42 | 20.93  | 22.48  |
| 43 | 11.76  | 6.48   |
| 44 |        |        |
| 45 | 32.08  | 26.56  |
| 46 | 0.00   | 11.44  |
| 47 | 143.16 | 188.51 |
| 48 |        |        |
| 49 | 49.75  | 51.09  |
| 50 |        |        |
| 51 | 119.45 | 133.31 |
| 52 | 0.00   | 0.00   |
| 53 |        |        |
| 54 | 249.99 | 271.56 |
| 55 | 40.84  | 31.56  |
| 56 | 46.94  | 34.11  |
| 57 |        |        |
| 58 | 59.86  | 73.42  |
| 59 |        |        |
| 60 |        |        |
|    | 2019   | 2020   |

|    |             |             |
|----|-------------|-------------|
| 1  |             |             |
| 2  | 93.33       | 81.19       |
| 3  |             |             |
| 4  | 140.70      | 112.19      |
| 5  | 21.52       | 21.38       |
| 6  | 3.80        | 3.67        |
| 7  |             |             |
| 8  | 338.83      | 338.07      |
| 9  | 402.95      | 450.43      |
| 10 |             |             |
| 11 | 360.22      | 270.74      |
| 12 | 22.70       | 33.80       |
| 13 |             |             |
| 14 | 228.62      | 217.74      |
| 15 | 38.80       | 44.75       |
| 16 |             |             |
| 17 | 193.59      | 165.76      |
| 18 | 326.11      | 356.31      |
| 19 |             |             |
| 20 | 279.53      | 267.00      |
| 21 | 15.30       | 15.16       |
| 22 |             |             |
| 23 | 0.00        | 0.00        |
| 24 | 73.33       | 94.70       |
| 25 |             |             |
| 26 | 61.08       | 78.44       |
| 27 | 261.55      | 280.62      |
| 28 |             |             |
| 29 | 95.15       | 92.80       |
| 30 |             |             |
| 31 |             |             |
| 32 | <b>2019</b> | <b>2020</b> |
| 33 | 63.51       | 60.73       |
| 34 | 108.68      | 92.26       |
| 35 | 69.17       | 49.41       |
| 36 | 7.28        | 8.03        |
| 37 |             |             |
| 38 | 326.78      | 360.40      |
| 39 | 636.15      | 641.98      |
| 40 | 140.90      | 168.38      |
| 41 | 35.46       | 41.05       |
| 42 | 204.16      | 189.02      |
| 43 | 22.62       | 24.76       |
| 44 |             |             |
| 45 | 205.22      | 160.79      |
| 46 | 13.13       | 35.99       |
| 47 |             |             |
| 48 | 271.30      | 316.92      |
| 49 | 40.63       | 39.05       |
| 50 |             |             |
| 51 | 0.00        | 0.00        |
| 52 | 435.74      | 436.55      |
| 53 | 4.14        | 12.06       |
| 54 |             |             |
| 55 | 53.18       | 75.74       |
| 56 |             |             |
| 57 | 43.28       | 42.55       |
| 58 |             |             |
| 59 |             |             |
| 60 |             |             |

|  | 2019     | 2020     |
|--|----------|----------|
|  | 2285.73  | 2463.85  |
|  | 3525.69  | 3422.12  |
|  | 600.32   | 774.93   |
|  | 339.97   | 383.63   |
|  | 11964.22 | 12867.53 |
|  | 21477.72 | 25392.40 |
|  | 12993.19 | 14695.02 |
|  | 1990.32  | 2326.07  |
|  | 8428.94  | 8877.37  |
|  | 2786.66  | 3171.38  |
|  | 8197.88  | 8036.22  |
|  | 24886.76 | 26404.35 |
|  | 4967.00  | 5602.81  |
|  | 2544.68  | 2714.78  |
|  | 33.89    | 0.00     |
|  | 11500.29 | 12132.67 |
|  | 6456.90  | 6512.38  |
|  | 6915.37  | 7737.01  |
|  | 2153.51  | 2392.02  |
|  | 2019     | 2020     |
|  | 16.37    | 12.80    |
|  | 27.22    | 35.50    |
|  | 3.77     | 6.59     |
|  | 4.08     | 3.01     |
|  | 82.97    | 93.46    |
|  | 94.85    | 89.10    |
|  | 24.36    | 84.81    |
|  | 22.99    | 15.43    |
|  | 14.59    | 14.73    |
|  | 33.86    | 28.61    |
|  | 28.63    | 41.87    |
|  | 167.87   | 185.58   |
|  | 46.33    | 52.70    |
|  | 75.05    | 64.08    |
|  | 0.00     | 0.00     |
|  | 42.46    | 39.99    |

|    |             |             |
|----|-------------|-------------|
| 1  |             |             |
| 2  | 47.11       | 44.41       |
| 3  |             |             |
| 4  | 35.00       | 55.03       |
| 5  | 24.43       | 32.33       |
| 6  |             |             |
| 7  |             |             |
| 8  | <b>2019</b> | <b>2020</b> |
| 9  | 186.92      | 148.11      |
| 10 |             |             |
| 11 | 221.38      | 296.54      |
| 12 | 30.93       | 23.37       |
| 13 |             |             |
| 14 | 20.32       | 23.85       |
| 15 | 562.98      | 609.17      |
| 16 |             |             |
| 17 | 1593.65     | 1227.72     |
| 18 | 1784.94     | 1517.68     |
| 19 |             |             |
| 20 | 128.40      | 199.82      |
| 21 | 519.05      | 500.65      |
| 22 |             |             |
| 23 | 221.61      | 231.16      |
| 24 | 500.18      | 602.47      |
| 25 |             |             |
| 26 | 1661.99     | 1754.86     |
| 27 | 394.61      | 431.36      |
| 28 |             |             |
| 29 | 253.90      | 216.85      |
| 30 | 0.00        | 0.00        |
| 31 |             |             |
| 32 | 755.07      | 872.28      |
| 33 | 462.68      | 518.97      |
| 34 |             |             |
| 35 | 352.65      | 420.58      |
| 36 | 130.05      | 189.90      |
| 37 |             |             |
| 38 |             |             |
| 39 | <b>2019</b> | <b>2020</b> |
| 40 | 0.00        | 0.00        |
| 41 |             |             |
| 42 | 216.49      | 214.14      |
| 43 | 0.00        | 0.00        |
| 44 |             |             |
| 45 | 14.96       | 16.91       |
| 46 | 3299.36     | 3523.49     |
| 47 |             |             |
| 48 | 1303.34     | 2987.19     |
| 49 | 106.11      | 0.00        |
| 50 |             |             |
| 51 | 59.45       | 104.34      |
| 52 | 795.62      | 768.54      |
| 53 |             |             |
| 54 | 207.79      | 203.91      |
| 55 | 458.34      | 677.35      |
| 56 |             |             |
| 57 | 888.52      | 1116.61     |
| 58 | 168.34      | 243.99      |
| 59 |             |             |
| 60 | 0.00        | 0.00        |
|    | 196.19      | 216.89      |

|   |         |         |
|---|---------|---------|
| 1 |         |         |
| 2 | 239.21  | 269.25  |
| 3 | 1019.18 | 1441.36 |
| 4 |         |         |
| 5 | 0.00    | 0.00    |
| 6 |         |         |

|    | 2019    | 2020    |
|----|---------|---------|
| 9  | 236.16  | 209.21  |
| 10 |         |         |
| 11 | 570.67  | 362.88  |
| 12 | 38.14   | 272.45  |
| 13 |         |         |
| 14 | 73.70   | 58.99   |
| 15 | 4480.40 | 5007.88 |
| 16 |         |         |
| 17 | 6353.65 | 8486.64 |
| 18 | 1039.72 | 838.75  |
| 19 |         |         |
| 20 | 164.36  | 170.84  |
| 21 | 308.00  | 354.51  |
| 22 |         |         |
| 23 | 32.30   | 29.31   |
| 24 | 192.20  | 274.26  |
| 25 |         |         |
| 26 | 2066.44 | 2194.54 |
| 27 | 1192.68 | 1050.94 |
| 28 |         |         |
| 29 | 454.46  | 689.06  |
| 30 | 51.38   | 50.71   |
| 31 |         |         |
| 32 | 2087.67 | 1754.41 |
| 33 | 837.71  | 801.17  |
| 34 |         |         |
| 35 | 137.49  | 1103.53 |
| 36 | 909.17  | 435.95  |
| 37 |         |         |
| 38 |         |         |
| 39 |         |         |
| 40 |         |         |
| 41 |         |         |
| 42 |         |         |
| 43 |         |         |

|    | 2019      | 2020      |
|----|-----------|-----------|
| 45 | 53,217.04 | 56,030.55 |
| 46 |           |           |
| 47 | 57,752.69 | 56,809.93 |
| 48 |           |           |
| 49 | -         | 56,306.44 |
| 50 | -         | -         |
| 51 |           |           |
| 52 | 53,948.28 | 57,227.64 |
| 53 | 47,711.83 | 54,608.57 |
| 54 |           |           |
| 55 | 48,320.59 | 52,181.02 |
| 56 | 54,186.37 | 52,416.80 |
| 57 |           |           |
| 58 | 51,656.72 | 48,906.94 |
| 59 | 55,701.51 | 58,040.20 |
| 60 | 54,561.15 | 62,414.71 |

|    |           |           |
|----|-----------|-----------|
| 1  |           |           |
| 2  | 53,488.62 | 48,131.81 |
| 3  | 53,235.48 | 47,935.76 |
| 4  |           |           |
| 5  | 57,389.28 | 59,001.49 |
| 6  | -         | -         |
| 7  |           |           |
| 8  | 51,196.85 | 54,460.89 |
| 9  | 58,767.14 | 56,143.12 |
| 10 |           |           |
| 11 | 58,722.54 | 62,692.09 |
| 12 | 57,312.40 | 69,279.94 |
| 13 |           |           |

|    | 2019       | 2020       |
|----|------------|------------|
| 15 |            |            |
| 16 | 222,038.95 | 258,422.67 |
| 17 | 244,228.96 | 219,342.50 |
| 18 |            |            |
| 19 | -          | -          |
| 20 |            |            |
| 21 | 321,563.23 | 301,664.40 |
| 22 | 338,736.59 | 328,942.29 |
| 23 | 226,923.42 | 268,525.33 |
| 24 | 534,590.36 | 432,186.53 |
| 25 | 192,368.52 | 224,420.52 |
| 26 | 163,592.37 | 178,119.31 |
| 27 | 209,018.87 | 223,448.37 |
| 28 | 233,890.79 | 260,355.25 |
| 29 | 337,665.40 | 316,318.47 |
| 30 | 295,684.06 | 308,761.37 |
| 31 | 275,785.03 | 276,662.82 |
| 32 |            |            |
| 33 | -          | -          |
| 34 |            |            |
| 35 | 291,650.64 | 316,627.20 |
| 36 | 226,300.82 | 220,131.11 |
| 37 | 269,047.59 | 257,730.46 |
| 38 | 215,942.11 | 249,121.03 |
| 39 |            |            |
| 40 |            |            |
| 41 |            |            |
| 42 |            |            |
| 43 |            |            |
| 44 |            |            |
| 45 |            |            |
| 46 |            |            |
| 47 |            |            |
| 48 |            |            |
| 49 |            |            |

|    | 2019       | 2020       |
|----|------------|------------|
| 50 |            |            |
| 51 | 114,499.88 | 121,985.21 |
| 52 | 89,967.35  | 101,293.40 |
| 53 | 107,672.81 | 106,612.38 |
| 54 | 113,299.66 | 119,681.66 |
| 55 | 125,208.28 | 121,340.16 |
| 56 | 113,306.48 | 106,372.10 |
| 57 | 132,194.95 | 94,281.43  |
| 58 |            |            |
| 59 |            |            |
| 60 |            |            |

|    |             |             |
|----|-------------|-------------|
| 1  |             |             |
| 2  | 111,786.61  | 120,039.53  |
| 3  | 113,533.69  | 125,189.79  |
| 4  |             |             |
| 5  | 101,949.52  | 101,303.31  |
| 6  | -           | 111,880.92  |
| 7  |             |             |
| 8  | 106,469.80  | -           |
| 9  | 131,112.84  | 114,705.90  |
| 10 |             |             |
| 11 | 116,671.44  | 108,504.60  |
| 12 | -           | -           |
| 13 |             |             |
| 14 | 134,685.71  | 130,052.01  |
| 15 | 112,441.80  | 118,497.42  |
| 16 |             |             |
| 17 | 149,994.06  | 124,600.35  |
| 18 | 122,113.52  | 124,822.78  |
| 19 |             |             |
| 20 |             |             |
| 21 | <b>2019</b> | <b>2020</b> |
| 22 |             |             |
| 23 | 157,795.44  | 149,201.89  |
| 24 | 125,787.21  | 140,414.60  |
| 25 |             |             |
| 26 | 138,926.44  | 138,042.33  |
| 27 | 149,873.95  | 144,803.25  |
| 28 |             |             |
| 29 | 144,902.20  | 148,273.02  |
| 30 | 162,860.83  | 163,377.21  |
| 31 |             |             |
| 32 | 159,275.29  | 155,622.51  |
| 33 | 161,597.63  | 160,438.26  |
| 34 |             |             |
| 35 | 176,598.91  | 168,199.60  |
| 36 | 105,693.88  | 121,903.40  |
| 37 |             |             |
| 38 | 157,723.02  | 162,071.07  |
| 39 | 152,702.09  | 150,159.38  |
| 40 |             |             |
| 41 | 149,953.44  | 148,484.85  |
| 42 | 149,422.30  | 148,046.88  |
| 43 |             |             |
| 44 | -           | -           |
| 45 | 149,706.13  | 153,061.09  |
| 46 | 180,187.95  | 179,949.21  |
| 47 |             |             |
| 48 | 148,585.58  | 149,450.36  |
| 49 | 194,135.52  | 189,335.68  |
| 50 |             |             |
| 51 |             |             |
| 52 | <b>2019</b> | <b>2020</b> |
| 53 |             |             |
| 54 | 157,905.60  | 150,983.07  |
| 55 | 136,025.10  | 144,337.17  |
| 56 |             |             |
| 57 | 156,330.87  | 148,889.11  |
| 58 | 143,412.91  | 135,537.73  |
| 59 |             |             |
| 60 | 157,710.53  | 151,433.71  |
|    | 155,155.64  | 159,323.08  |

|    |             |             |
|----|-------------|-------------|
| 1  |             |             |
| 2  | 161,977.81  | 161,311.35  |
| 3  | 151,480.64  | 146,117.58  |
| 4  | 187,749.44  | 182,515.28  |
| 5  | 143,752.13  | 118,040.75  |
| 6  | 167,203.07  | 131,001.92  |
| 7  | 166,050.99  | 151,661.84  |
| 8  | 152,273.25  | 148,925.32  |
| 9  | 132,265.10  | 127,114.35  |
| 10 |             |             |
| 11 | -           | -           |
| 12 | 153,663.73  | 149,861.34  |
| 13 | 170,957.04  | 166,047.27  |
| 14 | 151,072.16  | 148,931.26  |
| 15 | 147,163.21  | 144,664.44  |
| 16 |             |             |
| 17 |             |             |
| 18 |             |             |
| 19 |             |             |
| 20 |             |             |
| 21 |             |             |
| 22 |             |             |
| 23 |             |             |
| 24 |             |             |
| 25 |             |             |
| 26 |             |             |
| 27 |             |             |
| 28 | <b>2019</b> | <b>2020</b> |
| 29 | 386,442.27  | 394,468.46  |
| 30 | 355,867.41  | 389,375.19  |
| 31 | 502,514.34  | 473,352.57  |
| 32 | 451,504.68  | 458,021.20  |
| 33 | 433,449.78  | 447,555.41  |
| 34 | 457,565.87  | 510,228.59  |
| 35 | 366,102.33  | 378,775.77  |
| 36 | 410,755.71  | 430,172.92  |
| 37 | 373,347.76  | 366,324.21  |
| 38 | 349,597.09  | 339,746.81  |
| 39 | 408,931.84  | 417,925.86  |
| 40 | 382,777.76  | 388,174.57  |
| 41 | 410,203.95  | 429,368.88  |
| 42 | 407,441.67  | 441,920.45  |
| 43 | 247,942.57  | -           |
| 44 | 494,041.18  | 504,989.96  |
| 45 | 441,474.26  | 434,477.76  |
| 46 | 393,729.19  | 404,476.28  |
| 47 | 360,130.77  | 364,194.12  |
| 48 |             |             |
| 49 |             |             |
| 50 |             |             |
| 51 |             |             |
| 52 |             |             |
| 53 |             |             |
| 54 |             |             |
| 55 |             |             |
| 56 |             |             |
| 57 |             |             |
| 58 | 86,516.01   | 108,194.58  |
| 59 | 85,160.75   | 88,872.96   |
| 60 |             |             |



|    |            |            |
|----|------------|------------|
| 1  |            |            |
| 2  | 85,065.31  | 74,428.00  |
| 3  | 96,542.47  | 118,672.01 |
| 4  | 83,091.98  | 92,812.51  |
| 5  | 89,456.74  | 96,955.96  |
| 6  | 69,995.98  | 81,250.77  |
| 7  | 70,170.32  | 65,925.09  |
| 8  | 93,902.50  | 94,823.20  |
| 9  | 92,236.22  | 77,954.80  |
| 10 | 139,964.00 | 136,451.34 |
| 11 | 81,627.83  | 93,849.07  |
| 12 | 73,912.23  | 91,271.26  |
| 13 | 104,717.39 | 78,233.28  |
| 14 |            |            |
| 15 | -          | -          |
| 16 | 82,343.01  | 96,955.19  |
| 17 | 88,440.15  | 83,365.45  |
| 18 | 81,331.13  | 93,788.97  |
| 19 | 83,063.64  | 82,455.40  |
| 20 |            |            |
| 21 |            |            |
| 22 |            |            |
| 23 |            |            |
| 24 |            |            |
| 25 |            |            |
| 26 |            |            |
| 27 |            |            |
| 28 | 202,578.19 | 189,693.82 |
| 29 | 184,713.73 | 185,578.38 |
| 30 | 233,047.69 | -          |
| 31 | 150,081.86 | 176,193.72 |
| 32 | 179,453.53 | 190,141.70 |
| 33 | 210,688.64 | 248,105.78 |
| 34 | 250,240.36 | 264,352.22 |
| 35 | 166,219.33 | 198,517.40 |
| 36 | 196,547.66 | 185,934.71 |
| 37 | 162,533.15 | 163,254.27 |
| 38 | 163,009.25 | 178,495.03 |
| 39 | 185,951.08 | 205,432.12 |
| 40 | 188,347.14 | 198,092.97 |
| 41 | 190,758.76 | 235,326.60 |
| 42 |            |            |
| 43 | -          | -          |
| 44 | 188,972.72 | 214,161.47 |
| 45 | 185,505.28 | 212,194.66 |
| 46 | 176,765.07 | 199,103.14 |
| 47 | 165,825.69 | 193,724.07 |
| 48 |            |            |
| 49 |            |            |
| 50 |            |            |
| 51 |            |            |
| 52 |            |            |
| 53 |            |            |
| 54 |            |            |
| 55 |            |            |
| 56 |            |            |
| 57 |            |            |
| 58 | -          | -          |
| 59 | 677,401.90 | 670,033.52 |
| 60 |            |            |
|    | -          | -          |

|    |              |              |
|----|--------------|--------------|
| 1  |              |              |
| 2  | 442,128.23   | 499,464.67   |
| 3  | 1,270,793.25 | 1,172,914.59 |
| 4  | 877,951.80   | 1,320,523.51 |
| 5  | 304,937.86   | -            |
| 6  | 423,240.89   | 445,758.70   |
| 7  | 590,959.03   | 570,848.75   |
| 8  | 660,396.61   | 648,045.21   |
| 9  | 4,481,187.51 | 1,103,738.11 |
| 10 | 864,043.02   | 941,150.36   |
| 11 | 728,877.53   | 591,617.47   |
| 12 | -            | -            |
| 13 | -            | -            |
| 14 | 691,864.88   | 934,826.55   |
| 15 | 823,220.32   | 1,010,826.02 |
| 16 | 1,184,285.65 | 1,270,584.84 |
| 17 | -            | -            |
| 18 |              |              |
| 19 |              |              |
| 20 | 831,826.52   | 680,199.80   |
| 21 | 793,609.46   | 412,886.04   |
| 22 | 574,732.89   | 1,759,311.97 |
| 23 | 580,755.47   | 697,233.21   |
| 24 | 954,635.07   | 1,021,733.83 |
| 25 | 1,321,745.96 | 1,579,632.27 |
| 26 | 597,634.18   | 602,642.88   |
| 27 | 780,149.53   | 663,471.25   |
| 28 | 495,673.12   | 855,796.49   |
| 29 | 615,943.64   | 559,022.67   |
| 30 | 469,781.99   | 670,361.48   |
| 31 | 687,526.40   | 749,879.26   |
| 32 | 651,329.68   | 579,145.31   |
| 33 | 1,479,583.50 | 2,243,328.36 |
| 34 | 375,968.16   | 371,044.00   |
| 35 | 880,267.67   | 861,480.50   |
| 36 | 617,762.44   | 675,223.09   |
| 37 | 615,658.33   | 486,391.33   |
| 38 | 618,294.81   | 317,652.81   |
| 39 |              |              |
| 40 |              |              |
| 41 |              |              |
| 42 |              |              |
| 43 |              |              |
| 44 |              |              |
| 45 |              |              |
| 46 |              |              |
| 47 |              |              |
| 48 |              |              |
| 49 |              |              |
| 50 |              |              |
| 51 |              |              |
| 52 |              |              |
| 53 |              |              |
| 54 |              |              |
| 55 |              |              |
| 56 |              |              |
| 57 |              |              |
| 58 |              |              |
| 59 |              |              |
| 60 |              |              |

## Appendices

### Appendix I: NIH institutes and centers

NIH centers and institutes are: National Cancer Institute (NCI), National Eye Institute (NEI), National Heart, Lung, and Blood Institute (NHLBI), National Human Genome Research Institute (NHGRI), National Institute on Aging (NIA), National Institute on Alcohol Abuse and Alcoholism (NIAAA), National Institute of Allergy and Infectious Diseases (NIAID), National Institute of Arthritis and Musculoskeletal and Skin Diseases (NIAMS), National Institute of Biomedical Imaging and Bioengineering (NIBIB), National Institute of Child Health and Human Development (NICHD), National Institute on Deafness and Other Communication Disorders (NIDCD), National Institute of Dental and Craniofacial Research (NIDCR), National Institute of Diabetes and Digestive and Kidney Diseases (NIDDK), National Institute on Drug Abuse (NIDA), National Institute of Environmental Health Sciences (NIEHS), National Institute of General Medical Sciences (NIGMS), National Institute of Mental Health (NIMH), National Institute on Minority Health and Health Disparities (NIMHHD), National Institute of Neurological Disorders and Stroke (NINDS), National Institute of Nursing Research (NINR), National Library of Medicine (NLM), Center for Information Technology (CIT), Center for Scientific Review (CSR), Fogarty International Center (FIC), National Center for Advancing Translational Sciences (NCATS), National Center for Complementary and Integrative Health (NCCIH) and the NIH Clinical Center (NIH CC).

**Appendix II: NIH Grants included in the analysis**

Grants included in the analysis are: C06, D43, D71, DP1, DP2, DP3, DP5, DP7, F05, F30, F31, F32, F33, F99, G08, G11, G12, G13, G20, H25, H79, K00, K01, K02, K05, K06, K07, K08, K12, K18, K22, K23, K24, K25, K26, K30, K38, K76, K99, KL1, KL2, M01, N01, OT2, OT3, P01, P20, P2C, P30, P40, P41, P42, P50, P51, P60, PL1, PN2, R00, R01, R03, R13, R15, R18, R21, R24, R25, R33, R34, R35, R36, R37, R38, R49, R50, R55, R56, R61, R90, RC2, RC4, RF1, RL1, RL5, RL9, RM1, S10, S21, SC1, SC2, SC3, T01, T03, T15, T32, T34, T35, T36, T37, T42, T90, TL1, U01, U10, U13, U18, U19, U24, U2C, U2G, U2R, U34, U38, U41, U42, U45, U47, U48, U49, U50, U51, U52, U54, U56, U58, U59, U60, U62, U65, U79, U90, UC2, UC4, UC7, UD1, UE5, UF1, UG1, UG3, UH2, UH3, UH4, UL1, UM1, UM2, UR3, and UR6.

For peer review only

**Appendix III: Number of active physicians from 2010-2020 by specialty**

| Specialty      | Year | Number of physicians |
|----------------|------|----------------------|
| Anesthesiology | 2010 | 40123                |
| Anesthesiology | 2011 | 40335                |
| Anesthesiology | 2012 | 40546                |
| Anesthesiology | 2013 | 40758                |
| Anesthesiology | 2014 | 41055                |
| Anesthesiology | 2015 | 41351                |
| Anesthesiology | 2016 | 41557                |
| Anesthesiology | 2017 | 41762                |
| Anesthesiology | 2018 | 42015                |
| Anesthesiology | 2019 | 42267                |
| Anesthesiology | 2020 | 42267                |
| Dermatology    | 2010 | 10820                |
| Dermatology    | 2011 | 11001                |
| Dermatology    | 2012 | 11182                |
| Dermatology    | 2013 | 11363                |
| Dermatology    | 2014 | 11535                |
| Dermatology    | 2015 | 11706                |
| Dermatology    | 2016 | 11879                |
| Dermatology    | 2017 | 12051                |
| Dermatology    | 2018 | 12284                |
| Dermatology    | 2019 | 12516                |
| Dermatology    | 2020 | 12516                |

|                            |      |        |
|----------------------------|------|--------|
| Emergency Medicine         | 2010 | 33984  |
| Emergency Medicine         | 2011 | 35070  |
| Emergency Medicine         | 2012 | 36155  |
| Emergency Medicine         | 2013 | 37241  |
| Emergency Medicine         | 2014 | 38410  |
| Emergency Medicine         | 2015 | 39579  |
| Emergency Medicine         | 2016 | 40964  |
| Emergency Medicine         | 2017 | 42348  |
| Emergency Medicine         | 2018 | 43775  |
| Emergency Medicine         | 2019 | 45202  |
| Emergency Medicine         | 2020 | 45202  |
| Family Medicine            | 2010 | 106549 |
| Family Medicine            | 2011 | 107338 |
| Family Medicine            | 2012 | 108128 |
| Family Medicine            | 2013 | 108917 |
| Family Medicine            | 2014 | 110106 |
| Family Medicine            | 2015 | 111295 |
| Family Medicine            | 2016 | 112405 |
| Family Medicine            | 2017 | 113514 |
| Family Medicine            | 2018 | 115856 |
| Family Medicine            | 2019 | 118198 |
| Family Medicine            | 2020 | 118198 |
| Internal Medicine/Medicine | 2010 | 109048 |
| Internal Medicine/Medicine | 2011 | 109714 |
| Internal Medicine/Medicine | 2012 | 110381 |
| Internal Medicine/Medicine | 2013 | 111047 |
| Internal Medicine/Medicine | 2014 | 112568 |
| Internal Medicine/Medicine | 2015 | 114089 |
| Internal Medicine/Medicine | 2016 | 114823 |
| Internal Medicine/Medicine | 2017 | 115557 |

|                            |      |        |
|----------------------------|------|--------|
| Internal Medicine/Medicine | 2018 | 117864 |
| Internal Medicine/Medicine | 2019 | 120171 |
| Internal Medicine/Medicine | 2020 | 120171 |
| Neurology                  | 2010 | 12916  |
| Neurology                  | 2011 | 12996  |
| Neurology                  | 2012 | 13076  |
| Neurology                  | 2013 | 13156  |
| Neurology                  | 2014 | 13274  |
| Neurology                  | 2015 | 13392  |
| Neurology                  | 2016 | 13555  |
| Neurology                  | 2017 | 13717  |
| Neurology                  | 2018 | 13932  |
| Neurology                  | 2019 | 14146  |
| Neurology                  | 2020 | 14146  |
| Neurosurgery               | 2010 | 5047   |
| Neurosurgery               | 2011 | 5088   |
| Neurosurgery               | 2012 | 5130   |
| Neurosurgery               | 2013 | 5171   |
| Neurosurgery               | 2014 | 5259   |
| Neurosurgery               | 2015 | 5346   |
| Neurosurgery               | 2016 | 5439   |
| Neurosurgery               | 2017 | 5531   |
| Neurosurgery               | 2018 | 5640   |
| Neurosurgery               | 2019 | 5748   |
| Neurosurgery               | 2020 | 5748   |
| Obstetrics & Gynecology    | 2010 | 40377  |
| Obstetrics & Gynecology    | 2011 | 40527  |
| Obstetrics & Gynecology    | 2012 | 40676  |
| Obstetrics & Gynecology    | 2013 | 40826  |
| Obstetrics & Gynecology    | 2014 | 41154  |
| Obstetrics & Gynecology    | 2015 | 41481  |

|                         |      |       |
|-------------------------|------|-------|
| Obstetrics & Gynecology | 2016 | 41569 |
| Obstetrics & Gynecology | 2017 | 41656 |
| Obstetrics & Gynecology | 2018 | 42188 |
| Obstetrics & Gynecology | 2019 | 42720 |
| Obstetrics & Gynecology | 2020 | 42720 |
| Ophthalmology           | 2010 | 17943 |
| Ophthalmology           | 2011 | 18068 |
| Ophthalmology           | 2012 | 18192 |
| Ophthalmology           | 2013 | 18317 |
| Ophthalmology           | 2014 | 18455 |
| Ophthalmology           | 2015 | 18593 |
| Ophthalmology           | 2016 | 18705 |
| Ophthalmology           | 2017 | 18817 |
| Ophthalmology           | 2018 | 19065 |
| Ophthalmology           | 2019 | 19312 |
| Ophthalmology           | 2020 | 19312 |
| Orthopedics             | 2010 | 19822 |
| Orthopedics             | 2011 | 19673 |
| Orthopedics             | 2012 | 19523 |
| Orthopedics             | 2013 | 19374 |
| Orthopedics             | 2014 | 19260 |
| Orthopedics             | 2015 | 19145 |
| Orthopedics             | 2016 | 19073 |
| Orthopedics             | 2017 | 19001 |
| Orthopedics             | 2018 | 19035 |
| Orthopedics             | 2019 | 19069 |
| Orthopedics             | 2020 | 19069 |
| Otolaryngology          | 2010 | 9232  |
| Otolaryngology          | 2011 | 9261  |
| Otolaryngology          | 2012 | 9291  |
| Otolaryngology          | 2013 | 9320  |
| Otolaryngology          | 2014 | 9366  |
| Otolaryngology          | 2015 | 9411  |
| Otolaryngology          | 2016 | 9469  |
| Otolaryngology          | 2017 | 9526  |



|                |      |      |
|----------------|------|------|
| Otolaryngology | 2018 | 9652 |
| Otolaryngology | 2019 | 9777 |

|                           |      |       |
|---------------------------|------|-------|
| Otolaryngology            | 2020 | 9777  |
| Pathology                 | 2010 | 14975 |
| Pathology                 | 2011 | 14553 |
| Pathology                 | 2012 | 14132 |
| Pathology                 | 2013 | 13710 |
| Pathology                 | 2014 | 13498 |
| Pathology                 | 2015 | 13286 |
| Pathology                 | 2016 | 13063 |
| Pathology                 | 2017 | 12839 |
| Pathology                 | 2018 | 12741 |
| Pathology                 | 2019 | 12643 |
| Pathology                 | 2020 | 12643 |
| Pediatrics                | 2010 | 55509 |
| Pediatrics                | 2011 | 55760 |
| Pediatrics                | 2012 | 56011 |
| Pediatrics                | 2013 | 56262 |
| Pediatrics                | 2014 | 56903 |
| Pediatrics                | 2015 | 57543 |
| Pediatrics                | 2016 | 57989 |
| Pediatrics                | 2017 | 58435 |
| Pediatrics                | 2018 | 59527 |
| Pediatrics                | 2019 | 60618 |
| Pediatrics                | 2020 | 60618 |
| Physical Medicine & Rehab | 2010 | 8503  |
| Physical Medicine & Rehab | 2011 | 8637  |
| Physical Medicine & Rehab | 2012 | 8772  |
| Physical Medicine & Rehab | 2013 | 8906  |
| Physical Medicine & Rehab | 2014 | 9035  |
| Physical Medicine & Rehab | 2015 | 9164  |
| Physical Medicine & Rehab | 2016 | 9254  |
| Physical Medicine & Rehab | 2017 | 9343  |
| Physical Medicine & Rehab | 2018 | 9555  |
| Physical Medicine & Rehab | 2019 | 9767  |

|                               |      |       |
|-------------------------------|------|-------|
| Physical Medicine & Rehab     | 2020 | 9767  |
| Plastic Surgery               | 2010 | 6822  |
| Plastic Surgery               | 2011 | 6862  |
| Plastic Surgery               | 2012 | 6902  |
| Plastic Surgery               | 2013 | 6942  |
| Plastic Surgery               | 2014 | 6981  |
| Plastic Surgery               | 2015 | 7020  |
| Plastic Surgery               | 2016 | 7081  |
| Plastic Surgery               | 2017 | 7142  |
| Plastic Surgery               | 2018 | 7230  |
| Plastic Surgery               | 2019 | 7317  |
| Plastic Surgery               | 2020 | 7317  |
| Psychiatry                    | 2010 | 38289 |
| Psychiatry                    | 2011 | 37958 |
| Psychiatry                    | 2012 | 37627 |
| Psychiatry                    | 2013 | 37296 |
| Psychiatry                    | 2014 | 37516 |
| Psychiatry                    | 2015 | 37736 |
| Psychiatry                    | 2016 | 37971 |
| Psychiatry                    | 2017 | 38205 |
| Psychiatry                    | 2018 | 38499 |
| Psychiatry                    | 2019 | 38792 |
| Psychiatry                    | 2020 | 38792 |
| Radiation-Diagnostic/Oncology | 2010 | 32445 |
| Radiation-Diagnostic/Oncology | 2011 | 34213 |
| Radiation-Diagnostic/Oncology | 2012 | 35982 |
| Radiation-Diagnostic/Oncology | 2013 | 37750 |
| Radiation-Diagnostic/Oncology | 2014 | 38191 |
| Radiation-Diagnostic/Oncology | 2015 | 38632 |
| Radiation-Diagnostic/Oncology | 2016 | 39239 |
| Radiation-Diagnostic/Oncology | 2017 | 39846 |

|                               |      |       |
|-------------------------------|------|-------|
| Radiation-Diagnostic/Oncology | 2018 | 40572 |
| Radiation-Diagnostic/Oncology | 2019 | 41297 |
| Radiation-Diagnostic/Oncology | 2020 | 41297 |

For peer review only

|         |      |       |
|---------|------|-------|
| Surgery | 2010 | 26314 |
| Surgery | 2011 | 25938 |
| Surgery | 2012 | 25563 |
| Surgery | 2013 | 25187 |
| Surgery | 2014 | 25221 |
| Surgery | 2015 | 25254 |
| Surgery | 2016 | 25148 |
| Surgery | 2017 | 25042 |
| Surgery | 2018 | 25303 |
| Surgery | 2019 | 25564 |
| Surgery | 2020 | 25564 |
| Urology | 2010 | 9826  |
| Urology | 2011 | 9808  |
| Urology | 2012 | 9789  |
| Urology | 2013 | 9771  |
| Urology | 2014 | 9790  |
| Urology | 2015 | 9808  |
| Urology | 2016 | 9865  |
| Urology | 2017 | 9921  |
| Urology | 2018 | 10061 |
| Urology | 2019 | 10201 |
| Urology | 2020 | 10201 |

**Appendix IV: 10 most commonly awarded grant-types from 2011-2020**

| Grant-type | Title                                                       | Description                                                                                                                                                                                                                                                                                                                                                                         |
|------------|-------------------------------------------------------------|-------------------------------------------------------------------------------------------------------------------------------------------------------------------------------------------------------------------------------------------------------------------------------------------------------------------------------------------------------------------------------------|
| F32        | Postdoctoral Individual National Research Service Award     | To provide postdoctoral research training to individuals to broaden their scientific background and extend their potential for research in specified health-related areas.                                                                                                                                                                                                          |
| T32        | Institutional National Research Service Award               | To enable institutions to make National Research Service Awards to individuals selected by them for predoctoral and postdoctoral research training in specified shortage areas.                                                                                                                                                                                                     |
| K01        | Research Scientist Development Award - Research & Training  | For support of a scientist, committed to research, in need of both advanced research training and additional experience.                                                                                                                                                                                                                                                            |
| K08        | Clinical Investigator Award (CIA)                           | To provide the opportunity for promising medical scientists with demonstrated aptitude to develop into independent investigators, or for faculty members to pursue research aspects of categorical areas applicable to the awarding unit, and aid in filling the academic faculty gap in these shortage areas within health profession's institutions of the country.               |
| K23        | Mentored Patient-Oriented Research Career Development Award | To provide support for the career development of investigators who have made a commitment to focus their research endeavors on patient-oriented research. This mechanism provides support for a 3 year minimum up to 5 year period of supervised study and research for clinically trained professionals who have the potential to develop into productive, clinical investigators. |
| R01        | Research Project                                            | To support a discrete, specified, circumscribed project to be performed by the named investigator(s) in an area representing his or her specific interest and competencies                                                                                                                                                                                                          |
| R03        | Small Research Grants                                       | To provide research support specifically limited in time and amount for studies in categorical program areas. Small grants provide flexibility for initiating studies which are generally for preliminary short-term projects and are non-renewable.                                                                                                                                |
| R21        | Exploratory/Developmental Grants                            | To encourage the development of new research activities in categorical program areas. (Support generally is restricted in level of support and in time.)                                                                                                                                                                                                                            |
| P30        | Center Core Grants                                          | To support shared resources and facilities for categorical research by a number of investigators from different disciplines who provide a                                                                                                                                                                                                                                           |

1  
2  
3  
4  
5  
6  
7  
8  
9  
10  
11  
12  
13  
14  
15  
16  
17  
18  
19  
20  
21  
22  
23  
24  
25  
26  
27  
28  
29  
30  
31  
32  
33  
34  
35  
36  
37  
38  
39  
40  
41  
42  
43  
44  
45  
46  
47  
48  
49  
50  
51  
52  
53  
54  
55  
56  
57  
58  
59  
60

|     |                                              |                                                                                                                                                                                                                                                                                                                                                                                                                  |
|-----|----------------------------------------------|------------------------------------------------------------------------------------------------------------------------------------------------------------------------------------------------------------------------------------------------------------------------------------------------------------------------------------------------------------------------------------------------------------------|
|     |                                              | multidisciplinary approach to a joint research effort or from the same discipline who focus on a common research problem. The core grant is integrated with the center's component projects or program projects, though funded independently from them. This support, by providing more accessible resources, is expected to assure a greater productivity than from the separate projects and program projects. |
| U01 | Research Project--<br>Cooperative Agreements | To support a discrete, specified, circumscribed project to be performed by the named investigator(s) in an area representing his or her specific interest and competencies.                                                                                                                                                                                                                                      |

For peer review only

# BMJ Open

## Does NIH funding differ between medical specialties? A longitudinal analysis of NIH grant data by specialty and type of grant, 2011-2020

|                                 |                                                                                                          |
|---------------------------------|----------------------------------------------------------------------------------------------------------|
| Journal:                        | <i>BMJ Open</i>                                                                                          |
| Manuscript ID                   | bmjopen-2021-058191.R2                                                                                   |
| Article Type:                   | Original research                                                                                        |
| Date Submitted by the Author:   | 09-Nov-2022                                                                                              |
| Complete List of Authors:       | Schlaflly, Andrew; University of Pennsylvania Perelman School of Medicine,<br>Sebro, Ronnie; Mayo Clinic |
| <b>Primary Subject Heading</b>: | Research methods                                                                                         |
| Secondary Subject Heading:      | Public health, Health policy, Health services research, Medical education and training                   |
| Keywords:                       | STATISTICS & RESEARCH METHODS, PUBLIC HEALTH, EDUCATION & TRAINING (see Medical Education & Training)    |
|                                 |                                                                                                          |

SCHOLARONE™  
Manuscripts

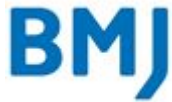

I, the Submitting Author has the right to grant and does grant on behalf of all authors of the Work (as defined in the below author licence), an exclusive licence and/or a non-exclusive licence for contributions from authors who are: i) UK Crown employees; ii) where BMJ has agreed a CC-BY licence shall apply, and/or iii) in accordance with the terms applicable for US Federal Government officers or employees acting as part of their official duties; on a worldwide, perpetual, irrevocable, royalty-free basis to BMJ Publishing Group Ltd ("BMJ") its licensees and where the relevant Journal is co-owned by BMJ to the co-owners of the Journal, to publish the Work in this journal and any other BMJ products and to exploit all rights, as set out in our [licence](#).

The Submitting Author accepts and understands that any supply made under these terms is made by BMJ to the Submitting Author unless you are acting as an employee on behalf of your employer or a postgraduate student of an affiliated institution which is paying any applicable article publishing charge ("APC") for Open Access articles. Where the Submitting Author wishes to make the Work available on an Open Access basis (and intends to pay the relevant APC), the terms of reuse of such Open Access shall be governed by a Creative Commons licence – details of these licences and which [Creative Commons](#) licence will apply to this Work are set out in our licence referred to above.

Other than as permitted in any relevant BMJ Author's Self Archiving Policies, I confirm this Work has not been accepted for publication elsewhere, is not being considered for publication elsewhere and does not duplicate material already published. I confirm all authors consent to publication of this Work and authorise the granting of this licence.



Does NIH funding differ between medical specialties? A longitudinal analysis of NIH grant data by specialty and type of grant, 2011-2020

Andrew Schlafly, A.B.<sup>1</sup>⊗  
Ronnie Sebro, M.D., Ph.D.<sup>2,3,4,⊗,\*</sup>

<sup>1</sup>Perelman School of Medicine,  
University of Pennsylvania,  
3400 Civic Center Blvd,  
Philadelphia,  
PA 19104, United States

<sup>2</sup>Center for Augmented Intelligence,  
Mayo Clinic,  
4500 San Pablo Road S.,  
Jacksonville,  
FL 32224, United States

<sup>3</sup>Department of Radiology,  
Mayo Clinic,  
4500 San Pablo Road S.,  
Jacksonville,  
FL 32224, United States

<sup>4</sup>Department of Orthopedic Surgery,  
Mayo Clinic,  
4500 San Pablo Road S.,  
Jacksonville,  
FL 32224, United States

⊗Both authors contributed equally to this work.

\*Corresponding author:  
Center for Augmented Intelligence,  
Mayo Clinic,  
4500 San Pablo Road S.,  
Jacksonville,  
FL 32224, United States  
Email: [rsebro@gmail.com](mailto:rsebro@gmail.com)

The authors have no competing interests to disclose.

Word Count of Manuscript Text: 3518

## **Abstract**

**Importance:** Differences in National Institutes of Health (NIH) funding between specialties may affect research and patient outcomes in less-well-funded specialties.

**Objective:** The aim of this study is to evaluate how NIH funding has been awarded by medical specialty. This study assesses differences and trends in the amount of funding, by medical specialty, for the years of 2011 through 2020, via a retrospective analysis of data from the NIH RePORTER (Research Portfolio Online Reporting Tools Expenditures and Results).

**Data Source:** NIH RePORTER data from years 2011-2020, for awarded NIH grants (F32, T32, K01, K08, K23, R01, R03, R21, U01, P30) in the following medical specialties: Anesthesiology, Dermatology, Emergency Medicine, Family Medicine, Internal Medicine, Neurology, Neurosurgery, Obstetrics and Gynecology, Ophthalmology, Orthopedic Surgery, Otolaryngology, Pathology, Pediatrics, Physical Medicine and Rehabilitation, Plastic Surgery, Psychiatry, Radiation-Diagnostic/Oncology, Surgery, and Urology.

**Main Outcomes and Measures:** The following measures were studied: (1) number of grants by specialty, (2) number of grants per active physician in each specialty, (3) total dollar-amount of grants by specialty, (4) total dollar-amount of grants per active physician in each specialty, and (5) mean dollar-amount awarded by specialty for each grant-type. We investigated whether any of these measures varied between medical specialties.

**Results:** In general, Internal Medicine/Medicine, Psychiatry, Pediatrics, Pathology, and Neurology received the most grants per year, had the highest number of grants per active physician, had the highest total amounts of funding and the highest amount of funding per active physician, whereas fields like Emergency Medicine, Plastic Surgery, Orthopedics and Obstetrics and Gynecology had the lowest. The mean dollar-amount awarded by grant-type differed significantly between specialties ( $P < \text{Bonferroni corrected alpha} = 0.00029$ ).

**Conclusions and Relevance:** NIH funding varies significantly between medical specialties. This may affect research progress and the careers of scientists and may affect patient outcomes in less well-funded specialties.

## **Article Summary**

### **Strengths and Limitations of this Study:**

- This study compares NIH funding across all medical specialties in the publicly available NIH database and evaluates an important clinical question - whether there are differences in funding between specialties.

- 1  
2  
3  
4  
5  
6  
7  
8  
9  
10  
11  
12  
13  
14  
15  
16  
17  
18  
19  
20  
21  
22  
23  
24  
25  
26  
27  
28  
29  
30  
31  
32  
33  
34  
35  
36  
37  
38  
39  
40  
41  
42  
43  
44  
45  
46  
47  
48  
49  
50  
51  
52  
53  
54  
55  
56  
57  
58  
59  
60
- We compare several funding measures by specialty including: (1) the number of grants awarded, (2) the number of grants per active physician, (3) the total dollar-amount of grants awarded, (4) the total-dollar amount of grants awarded per active physician and (5) the mean dollar amount of each grant.
  - This study was limited because there was no data on the success rate of grant applications by specialty.
  - The NIH data did not state whether the principal investigator was a physician or not, which limits the ability to evaluate if the funding of physician researchers varied by specialty.

## **Introduction**

The United States (US) National Institutes of Health (NIH) is a part of the US Department of Health and Human Services (HHS) and is the primary agency responsible for public health and biomedical research [1]. The NIH is comprised of over 27 separate institutes and centers covering several biomedical disciplines and specialties in medicine (Appendix I) [1].

Approximately 80% of NIH funding goes towards funding extramural research in the form of research grants [1].

NIH funding is used for the advancement of research across many fields of basic science and clinical medicine [2]. In fiscal year 2020, the total NIH funding was \$40.3 billion [2]. NIH funding is spread across many medical specialties, and the number of physicians in these medical specialties vary. Assuming that the number of active physicians can be viewed as a rough approximation of the demand for a specialty and a proxy for the disease burden (diseases treated by that specialty) in society, we hypothesized that the amount of funding for each specialty would be proportional to the number of active physicians in the specialty.

We investigated whether NIH funding metrics ((1) the number of grants, (2) number of active physicians per grant in that specialty, (3) the total dollar-amount of grants, (4) total dollar-amount of grants per active physician in that specialty, and (5) the mean dollar of each grant-type) vary between specialties and evaluated the trends in these NIH funding metrics from 2011 to 2020.

## **Methods**

### **Patient and Public Involvement Statement**

Neither patients nor members of the public were involved in any way, with this research. It was not appropriate or possible to involve patients or the public in the design, or conduct, or reporting, or dissemination plans of our research

This study was evaluated by the Mayo Clinic Institutional Review Board (IRB). The study involves freely available, public data, and was determined to be exempt.

### **Study Design and Data Source**

We carried out a retrospective analysis of the NIH's Research Portfolio Online Reporting Tools Expenditures and Results (RePORTER) database (<https://reporter.nih.gov/>), which has data on grants that were awarded by the NIH [3]. Unlike the federal Query/View/Report (QVR) database, the RePORTER database shows data only for grants that were awarded and therefore does not allow for analysis of data involving grant-applications that did not result in the awarding of a grant. As a result, we could not evaluate the success-rates of grant applications by specialty.

The RePORTER database was searched for grants awarded between 2011 and 2020, which were classified, based on the department name on the grant application, into one of the following 19 specialties: Anesthesiology, Dermatology, Emergency Medicine, Family Medicine, Internal Medicine, Neurology, Neurosurgery, Obstetrics and Gynecology, Ophthalmology, Orthopedic Surgery, Otolaryngology, Pathology, Pediatrics, Physical Medicine and Rehabilitation, Plastic

1  
2  
3 Surgery, Psychiatry, Radiation-Diagnostic/Oncology, Surgery, and Urology [3, 4]. These  
4 specialties were chosen because they were the medical specialties in clinical medicine available  
5 in the RePORTER database. The grants that were not classified as one of these specialties were  
6 excluded. We included all grants for each specialty from the RePORTER database. The grant-  
7 types appearing in the data set are listed in Appendix II.  
8  
9  
10  
11  
12  
13

### 14 15 16 17 Number of active physicians

18  
19 The number of active physicians was obtained from the Physician Specialty Data Report by the  
20 American Association of Medical Colleges (AAMC) [5]. The number of active physicians  
21 included those from all training-pathways, including Doctor of (Allopathic) Medicine (M.D.),  
22 Doctor of Osteopathic Medicine (D.O.), and international medical graduates (IMG) [5]. Because  
23 the number of active physicians per specialty was only available for certain years, during the  
24 time-period of 2010-2020, linear interpolation was used to estimate the number of active  
25 physicians in the unlisted years (2011, 2012, 2014, 2016, 2018, and 2020) [5]. This data is shown  
26 in Appendix III.  
27  
28  
29  
30  
31  
32  
33  
34  
35  
36  
37  
38  
39

#### 40 *(1) Number of NIH grants by specialty*

41  
42 We evaluated all grants awarded over the 10-year period to identify the mostly frequently  
43 awarded grant-types. The ten most frequently awarded grant-types were R01, R03, R21, F32,  
44 T32, K01, K08, K23, U01, and P30. The titles and descriptions of these grant-types appear in  
45 Appendix IV. Plots of the number of grants by specialty, and the percent-change in the number  
46 of grants from 2011 by specialty were created. We systematically evaluated NIH grants awarded  
47 at critical periods in the academic career pipeline including training grants (pre-doctoral T32, and  
48  
49  
50  
51  
52  
53  
54  
55  
56  
57  
58  
59  
60

1  
2  
3 post-doctoral F32); career development grants (K01, K08, and K23); and grants typically  
4 awarded in the later/advanced career stages, including the R01, R03, R21, P30 and U01 grants.  
5  
6  
7  
8  
9

10 *(2) Number of active physicians in each specialty per grant*

11  
12 To evaluate how many active physicians existed per grant type, the total number of active  
13 physicians was divided by the total number of each grant type for each year for each specialty.  
14  
15 This metric gauges how rare it is for a physician of each specialty to have any grant type.  
16  
17  
18  
19  
20

21 *(3) Total dollar-amount of NIH grants awarded in each specialty*

22  
23 To evaluate whether the differences in numbers of grants resulted in differences in dollar-  
24 amounts of funding for each specialty, we calculated the total dollar-amounts of funding by  
25 specialty from 2011-2020 after adjusting for inflation [6]. The total dollar-amount of funding  
26 was calculated for each specialty for each grant type during the study period. The annual funding  
27 each year from 2012 through 2020 was converted to year-2011 dollars, using the Gross Domestic  
28 Product (GDP) Price Index for the relevant years [6]. To evaluate changes in funding over the  
29 time-period studied, for each year after 2011, we calculated the percent-change in the dollar-  
30 amount of funding after adjusting for inflation (compared to 2011) by specialty.  
31  
32  
33  
34  
35  
36  
37  
38  
39  
40  
41  
42  
43

44 *(4) Dollar-amount of grants per active physician*

45  
46 Because the total dollar-amount of grants may be affected by the number of researchers in that  
47 specialty and therefore the number of active physicians, we calculated the number of dollars of  
48 funding per active physician to adjust for the differing sizes of the medical specialties. We  
49  
50  
51  
52  
53  
54  
55  
56  
57  
58  
59  
60

1  
2  
3 divided the dollar-amount of funding for each specialty by the number of active physicians in  
4 that specialty to calculate the dollar-amount of grants per active physician.  
5  
6  
7  
8  
9

10 *(5) Mean dollar-amount per grant for each specialty by grant-type*

11  
12 The dollar-amounts vary by grant-type, with smaller grants typically awarded to early-stage  
13 investigators and larger grants awarded to more seasoned investigators. We hypothesized that  
14 there should be no differences between specialties when evaluated the mean dollar-amount per  
15 grant for a given grant-type. To test this hypothesis, we calculated the mean and standard  
16 deviation of the inflation-adjusted dollar-amount per grant by specialty for each grant-type for  
17 2011-2020.  
18  
19  
20  
21  
22  
23  
24  
25  
26  
27

28 All analyses were performed in Excel, version 2107 (Microsoft, Redmond, Washington, USA)  
29 and R, version 4.1.2 (R Foundation for Statistical Computing, Vienna, Austria). Qualitative  
30 variables were compared between specialties using Chi-squared tests, while quantitative  
31 variables were compared between specialties using t-tests with unequal variances. All test-  
32 statistics were two-sided. To control for false-positive findings due to multiple comparisons  
33 between specialties, we used the Bonferroni-adjusted Type I error rate of  $\frac{0.05}{\binom{19}{2}} = 0.0002924$ , so  
34 that P-values less than this Bonferroni-adjusted Type I error rate were considered statistically  
35 significant.  
36  
37  
38  
39  
40  
41  
42  
43  
44  
45  
46  
47  
48  
49

50 **Results**

51  
52  
53 *(1) Number of grants*  
54  
55  
56  
57  
58  
59  
60



From 2011 through 2020, there were 184,382 grants awarded by the NIH in the specialties considered. Internal Medicine/Medicine, 72,205 (37.2%); Psychiatry, 19,029 (10.3%); Pediatrics, 17,422 (9.4%); and Pathology, 14,946 (8.1%), were the specialties that received the most NIH grants (Table 1). In comparison, Plastic Surgery, 16 grants (0.009%); Emergency Medicine, 1258 (0.7%); Family Medicine, 2015 (1.1%); and Neurosurgery, 2956 (1.6%), were the specialties that received the fewest NIH grants (Table 1).

**Table 1: NIH funding per active physician by specialty, 2011-2020**

| Specialty                         | Rank<br>(based on<br>average<br>dollars of<br>funding<br>per active<br>physician<br>per year) | Number of<br>grants | Percent of<br>total<br>grants<br>awarded | Average<br>number of<br>grants<br>per<br>active<br>physician | Dollar<br>amount of<br>funding (K,<br>round<br>ed to<br>MM) | Percent<br>of<br>total | Average<br>number<br>of active<br>physicians,<br>2011-<br>2020 | Average<br>dollars of<br>funding<br>per<br>active<br>physician<br>per year<br>(K) |
|-----------------------------------|-----------------------------------------------------------------------------------------------|---------------------|------------------------------------------|--------------------------------------------------------------|-------------------------------------------------------------|------------------------|----------------------------------------------------------------|-----------------------------------------------------------------------------------|
| Pathology                         | 1                                                                                             | 14,946              | 8.1                                      | 0.112                                                        | 6366.7                                                      | 7.6                    | 13,311                                                         | 47.8                                                                              |
| Neurology                         | 2                                                                                             | 12,448              | 6.8                                      | 0.092                                                        | 6001.6                                                      | 7.2                    | 13,539                                                         | 44.3                                                                              |
| Internal<br>Medicine/Med<br>icine | 3                                                                                             | 72,205              | 39.2                                     | 0.063                                                        | 36022.<br>6                                                 | 43.2                   | 114,639                                                        | 31.4                                                                              |
| Psychiatry                        | 4                                                                                             | 19,029              | 10.3                                     | 0.050                                                        | 8267.6                                                      | 9.9                    | 38,089                                                         | 21.7                                                                              |

|                                       |    |        |     |        |        |     |        |      |
|---------------------------------------|----|--------|-----|--------|--------|-----|--------|------|
| Neurosurgery                          | 5  | 2,956  | 1.6 | 0.055  | 1111.6 | 1.3 | 5,410  | 20.5 |
| Pediatrics                            | 6  | 17,422 | 9.4 | 0.030  | 7896.5 | 9.5 | 57,967 | 13.6 |
| Ophthalmolog<br>y                     | 7  | 5,957  | 3.2 | 0.032  | 2380.8 | 2.9 | 18,684 | 12.7 |
| Surgery                               | 8  | 8,171  | 4.4 | 0.032  | 3212.5 | 3.9 | 25,378 | 12.7 |
| Otolaryngolog<br>y                    | 9  | 3,198  | 1.7 | 0.034  | 110.23 | 1.3 | 9,485  | 11.6 |
| Radiation-<br>Diagnostic/On<br>cology | 10 | 9,562  | 5.2 | 0.025  | 3999.4 | 4.8 | 38,702 | 10.3 |
| Dermatology                           | 11 | 2,270  | 1.2 | 0.019  | 764.5  | 0.9 | 11,803 | 6.5  |
| Urology                               | 12 | 1,474  | 0.8 | 0.015  | 572.7  | 0.7 | 9,922  | 5.8  |
| Obstetrics &<br>Gynecology            | 13 | 4,343  | 2.4 | 0.010  | 1697.8 | 2   | 41,552 | 4.1  |
| Physical<br>Medicine &<br>Rehab       | 14 | 1,124  | 0.6 | 0.012  | 357.9  | 0.4 | 9,220  | 3.9  |
| Orthopedics                           | 15 | 2,218  | 1.2 | 0.012  | 750.2  | 0.9 | 19,222 | 3.9  |
| Anesthesiolog<br>y                    | 16 | 3,770  | 2   | 0.0091 | 1434.7 | 1.7 | 41,391 | 3.5  |
| Emergency<br>Medicine                 | 17 | 1,258  | 0.7 | 0.0031 | 550.2  | 0.7 | 40,395 | 1.4  |

|                    |    |                           |            |             |                           |            |                |            |
|--------------------|----|---------------------------|------------|-------------|---------------------------|------------|----------------|------------|
| Family<br>Medicine | 18 | 2,015                     | 1.1        | 0.0018      | 848.5                     | 1.0        | 112,396        | 0.8        |
| Plastic Surgery    | 19 | 16                        | 0.0        | 0.0002<br>3 | 4.6                       | 0.0        | 7,079          | 0.1        |
| <b>Total</b>       | -  | <b>18,438</b><br><b>2</b> | <b>100</b> | -           | <b>83342.</b><br><b>9</b> | <b>100</b> | <b>627,782</b> | <b>133</b> |

Internal Medicine/Medicine received the greatest number of grants, in aggregate over the period from 2011 through 2020, followed by Psychiatry, Pediatrics, Pathology, and Neurology (Supplementary Figures 1a and 1b). Internal Medicine/Medicine consistently received the greatest number of grants during the study.

The average percentage-change in the number of grants by specialty from 2012-2020 compared to the initial year (2011), was highest for Emergency Medicine (40.8%), Neurosurgery (34.2%), and Orthopedics (32.2%) (Supplementary Figure 2). The average percentage-change was lowest for Plastic Surgery (-51.9%), Otolaryngology (-36.8%) and Radiation-Diagnostic/Oncology (-24.5%) (Supplementary Figure 2).

Table 2 shows the number of the most-commonly awarded grant-types for each specialty and shows R01 and R21 were the most awarded grant-types. The numbers of the most awarded NIH training grants (F32, T32) (Supplementary Table 1), NIH career development grants (K01, K08, K23) (Supplementary Table 2), and NIH advanced career grants (R01, R03, R21, P30 and U01) (Supplementary Table 3) are shown for each year.

**Table 2: Total number of NIH grants awarded by specialty and grant-type aggregated from 2011 through 2020**

| Specialty                     | Training Grants |      | Career Development Grants |      |      | Advanced Career Grants |      |      |      |      |
|-------------------------------|-----------------|------|---------------------------|------|------|------------------------|------|------|------|------|
|                               | F32             | T32  | K01                       | K08  | K23  | R01                    | R03  | R21  | P30  | U01  |
| Anesthesiology                | 43              | 178  | 53                        | 167  | 126  | 2,258                  | 63   | 289  | 1    | 111  |
| Dermatology                   | 32              | 105  | 73                        | 146  | 49   | 1,169                  | 54   | 182  | 82   | 65   |
| Emergency<br>Medicine         | 4               | 9    | 9                         | 58   | 171  | 415                    | 27   | 58   | 0    | 89   |
| Family Medicine               | 2               | 51   | 97                        | 27   | 59   | 787                    | 56   | 174  | 30   | 131  |
| Internal<br>Medicine/Medicine | 1,16            | 3,69 | 1,46                      | 2,53 | 2,79 | 30,80                  | 1,14 | 3,82 | 3,12 | 4,51 |
| Neurology                     | 235             | 340  | 175                       | 352  | 529  | 5,769                  | 129  | 791  | 181  | 577  |
| Neurosurgery                  | 96              | 46   | 16                        | 101  | 44   | 1,669                  | 47   | 272  | 18   | 129  |
| Obstetrics &<br>Gynecology    | 46              | 107  | 48                        | 55   | 103  | 1,620                  | 119  | 286  | 41   | 137  |
| Ophthalmology                 | 83              | 204  | 7                         | 268  | 166  | 3,823                  | 15   | 327  | 303  | 67   |
| Orthopedics                   | 60              | 76   | 62                        | 48   | 26   | 1,349                  | 83   | 215  | 49   | 7    |
| Otolaryngology                | 86              | 157  | 9                         | 112  | 100  | 1,642                  | 118  | 225  | 118  | 38   |
| Pathology                     | 201             | 718  | 148                       | 306  | 21   | 8,110                  | 197  | 1282 | 206  | 390  |

|                                    |     |     |     |       |       |       |     |       |     |       |
|------------------------------------|-----|-----|-----|-------|-------|-------|-----|-------|-----|-------|
| Pediatrics                         | 194 | 865 | 208 | 1,007 | 924   | 7,467 | 362 | 1,146 | 186 | 1,161 |
| Physical Medicine & Rehabilitation | 17  | 46  | 80  | 6     | 68    | 443   | 58  | 89    | 0   | 51    |
| Plastic Surgery                    | 1   | 0   | 0   | 0     | 0     | 7     | 2   | 0     | 0   | 3     |
| Psychiatry                         | 293 | 772 | 743 | 250   | 1,060 | 9,066 | 236 | 1,580 | 133 | 825   |
| Radiation-Diagnostic/Oncology      | 65  | 266 | 147 | 66    | 36    | 5,424 | 145 | 1,062 | 81  | 342   |
| Surgery                            | 172 | 532 | 92  | 464   | 106   | 3,975 | 174 | 540   | 300 | 536   |
| Urology                            | 22  | 55  | 33  | 63    | 22    | 686   | 27  | 83    | 39  | 160   |

(2) Number of active physicians per grant:

More F32 grants were awarded in Neurology, Internal Medicine/Medicine, and Pathology than in Emergency Medicine. A F32 training grant was awarded for every 428-1,304 Neurologists, for every 875-1,113 Internal Medicine/Medicine physicians and for every 523-973 Pathologists (Supplementary Table 4). However, a F32 training grant was only awarded for every 33,984-45,202 Emergency Medicine physicians. T32 grants were also more commonly awarded in Neurology, Internal Medicine/Medicine, and Pathology than in Emergency Medicine. A T32 grant was awarded for every 349-462 Neurologists, every 256-337 Internal Medicine/Medicine physicians, every 144-230 Pathologists and every 21,174 -40,974 Emergency Medicine physicians (Supplementary Table 4).

1  
2  
3  
4  
5 Career development grants (K01, K08, and K23) were more frequently awarded in Internal  
6  
7  
8  
9  
10  
11  
12  
13  
14  
15  
16  
17  
18  
19  
20  
21  
22  
23  
24  
25  
26  
27  
28  
29  
30  
31  
32  
33  
34  
35  
36  
37  
38  
39  
40  
41  
42  
43  
44  
45  
46  
47  
48  
49  
50  
51  
52  
53  
54  
55  
56  
57  
58  
59  
60

Career development grants (K01, K08, and K23) were more frequently awarded in Internal Medicine/Medicine, Neurology, and Pathology as these specialties consistently had the lowest numbers of physicians per awarded grant (Supplementary Table 5) while Emergency Medicine, Family Medicine, and Radiation-Oncology/Diagnostic had the highest numbers of physicians per career development grant.

For the advanced career researcher grants (R01, R03, R21, P30, U01), Internal Medicine/Medicine, Neurology, and Pathology consistently had the lowest numbers of physicians per awarded grant (Supplementary Table 6). There was a R01 grant awarded for every 34-41 Internal Medicine/Medicine physicians, for every 20-25 Neurologists, and for every 15-17 Pathologists, while there was a R01 grant awarded for every 2,274-7,317 Plastic Surgeons, and for every 1,194-1,622 Family Medicine physicians. U01 grants were more commonly awarded in Internal Medicine/Medicine, and Neurology, and least commonly awarded in Orthopedics, and Family Medicine. A U01 grant was awarded for every 204-295 Internal Medicine/Medicine physicians, for every 174-391 Neurologists, for every 9,629-19,374 Orthopedists, and for every 7,420-11,820 Family Medicine physicians.

(3) Dollar-amount of grants: The total dollar-amount of funding awarded from 2011 to 2020 was \$83,342 MM USD (\$1 MM USD is 1 million United States Dollars). Of this total, the specialties receiving the largest total amounts of funding were Internal Medicine/Medicine (\$36,023MM (43.2%)), Psychiatry (\$8,268MM (9.9%)), and Pediatrics (\$7,897MM (9.5%)). The specialties receiving the least funding were Plastic Surgery (\$4.6MM (<0.1%)), Physical Medicine & Rehab

1  
2  
3 (\$358MM (0.4%)), and Emergency Medicine (\$550MM (0.7%)) (Table 1). Internal  
4  
5 Medicine/Medicine was the most-funded specialty after adjusting for inflation (Figure 1a),  
6  
7 however Pathology and Neurology were better funded after adjusting for number of active  
8  
9 physicians (Figure 1b). Emergency Medicine had the largest average percent-increase in the  
10  
11 amount of funding compared to the baseline year of 2011 of the specialties considered  
12  
13  
14 (Supplementary Figure 2).  
15  
16  
17  
18

19  
20 The dollar-amount of funding for each specialty for the NIH training grants (F32, T32) from  
21  
22 2011-2020 is shown in Supplementary Table 7. Emergency Medicine, Family Medicine, and  
23  
24 Plastic Surgery had the least amount of funding for these NIH training grants. For the NIH career  
25  
26 development grants, we found that Emergency Medicine and Family Medicine were also among  
27  
28 the least funded (Supplementary Table 8). Finally, we found that most of the more advanced  
29  
30 career NIH grants were in Internal Medicine/Medicine (Supplementary Table 9).  
31  
32  
33  
34

35  
36 (4) Dollar-amount of grants per active physician: Pathology (\$47.8K/year) and Neurology  
37  
38 (\$44.3K/year) had the highest amounts of funding per physician over 2011-2020 (Table 1), and  
39  
40 in each of the ten years studied (Figure 1b). Both Internal Medicine/Medicine and Neurology  
41  
42 were among the highest-funded per active physician for many of the grant-types studied. For  
43  
44 instance, for NIH T32 training grants, Internal Medicine/Medicine, Neurology, Pathology, and  
45  
46 Psychiatry had the highest amounts of funding per physician (Supplementary Table 10).  
47  
48 Likewise, Internal Medicine/Medicine, Neurology, Neurosurgery, and Pathology had the highest  
49  
50 amounts of F32 funding per physician (Supplementary Table 10). Internal Medicine/Medicine,  
51  
52 Neurology, Pathology, and Psychiatry had the highest amounts of K01 and K08 funding per  
53  
54  
55  
56  
57  
58  
59  
60

1  
2  
3 physician (Supplementary Table 11). Internal Medicine/Medicine, Neurology, Pediatrics, and  
4  
5 Psychiatry had the highest amounts of K23 funding per active physician (Supplementary Table  
6  
7 11). Internal Medicine/Medicine, Neurology, Neurosurgery, and Psychiatry had the highest  
8  
9 amounts of R01 and U01 funding per physician (Supplementary Table 12).  
10  
11  
12  
13

14  
15 *(5) Mean dollar-amount per grant for each specialty by grant-type*

16  
17 We compared the mean dollar-amount of each grant for each grant type between specialties to  
18  
19 assess whether the amount of funding varies between specialties. Supplementary Figures 3-12  
20  
21 show P-values from these comparisons. We found that the mean dollar-amount of the NIH  
22  
23 training grants (Supplementary Table 13) varied between specialties (Supplementary Figure 3  
24  
25 and Supplementary Figure 4). Pathology, Psychiatry, and Neurology had significantly different  
26  
27 F32 funding than Physical Medicine and Rehab ( $P < 0.0002924$ ); and Urology, Ophthalmology,  
28  
29 Dermatology, Surgery, Orthopedics and Otolaryngology had significantly different T32 funding  
30  
31 than Pathology ( $P < 0.0002924$ ). The mean dollar-amount of the NIH career development grants  
32  
33 (Supplementary Table 14) varied between specialties. Significant variation in mean K01 funding  
34  
35 (Supplementary Figure 5), mean K08 funding (Supplementary Figure 6) and K23 funding  
36  
37 (Supplementary Figure 7) was noted. For example, the mean K01 funding for Dermatology was  
38  
39 statistically significantly different from that for Physical Medicine and Rehabilitation,  
40  
41 Psychiatry, Neurology, Urology, Anesthesiology, Obstetrics and Gynecology, Radiology, Family  
42  
43 Medicine, Pathology, Pediatrics, Otolaryngology, and Internal Medicine/Medicine. The mean  
44  
45 dollar-amount of the NIH advanced career grants (Supplementary Table 15) varied between  
46  
47 specialties (Supplementary Figures 8-12). Psychiatry had significantly different R01 funding  
48  
49  
50  
51  
52  
53  
54  
55  
56  
57  
58  
59  
60



1  
2  
3 than all other specialties except Plastic Surgery, Family Medicine, and Emergency Medicine  
4  
5 (P<0.0002924).  
6  
7  
8  
9

## 10 **Discussion**

11  
12 The data show that the number of NIH grants awarded over the investigated period varied  
13  
14 substantially across specialties. Internal Medicine/Medicine consistently received the greatest  
15  
16 number of grants followed by Psychiatry, Pediatrics, Pathology and Neurology. After adjusting  
17  
18 for the number of active physicians in each specialty, we find that Neurology, Internal  
19  
20 Medicine/Medicine, and Pathology were the specialties with the greatest number of grants per  
21  
22 active physician, while Emergency Medicine, Family Medicine and Plastic Surgery were the  
23  
24 fields with the fewest number of grants per active physician, and this pattern was consistent  
25  
26 across training grants, career development grants and advanced career grants. We found that  
27  
28 Internal Medicine/Medicine had the greatest dollar amount of funding of all medical specialties.  
29  
30 After we adjusted the dollar amount of funding by the number of active physicians in each  
31  
32 specialty, we found that Pathology, Neurology, Internal Medicine/Medicine, and Psychiatry were  
33  
34 the specialties with the highest levels of funding per active physician, and Plastic Surgery,  
35  
36 Family Medicine, Emergency Medicine, and Anesthesiology were the specialties with the lowest  
37  
38 levels of funding per active physician. When we analyzed the mean amount of funding for each  
39  
40 grant-type, we found significant funding-amount differences between specialties.  
41  
42  
43  
44  
45  
46  
47  
48

49 Our results have tremendous clinical and biomedical ramifications. We show that there are  
50  
51 differences in the amount of funding, the amount of funding adjusted for the number of  
52  
53 physicians, the dollar amount of NIH funding adjusted for the number of physicians, and  
54  
55  
56  
57  
58  
59  
60

1  
2  
3 differences in the funding-amount for each grant-type between specialties. It is unclear why these  
4  
5 differences exist.  
6  
7  
8  
9

10 One speculation is that some of the better funded specialties (Internal Medicine/Medicine,  
11  
12 Neurology, Pathology) are more closely aligned with the NIH mission than other specialties,  
13  
14 however the NIH's mission is "To seek fundamental knowledge about the nature and behavior of  
15  
16 living systems and the application of that knowledge to enhance health, lengthen life, and reduce  
17  
18 illness and disability." (<https://www.nih.gov/about-nih/what-we-do/nih-almanac/about-nih>),  
19  
20 which is largely applicable to all medical specialties. One consideration is the number of  
21  
22 physicians in each specialty; or alternatively the number or amount of grants awarded to each  
23  
24 specialty does not reflect the patients' needs for the specialty in society. Another speculation is  
25  
26 that the better funded specialties are intrinsically better than the less funded specialties at doing  
27  
28 research, and in having a pipeline of training grants, career development grants and this has  
29  
30 resulted in the discrepancies that we have noted. One may speculate that a better funded specialty  
31  
32 at the training and career-development levels may result in that specialty being better funded  
33  
34 status at the more advanced research career levels.  
35  
36  
37  
38  
39  
40  
41

42 The differences in research-funding between specialties have likely already had  
43  
44 significant consequences for future progress in research. It has been shown that the proportion of  
45  
46 individuals with M.D./Ph.D.'s who spend at least 50% of their time on research differs markedly  
47  
48 by specialty [7]. We note that the three specialties that were most highly funded, on a per-  
49  
50 physician basis (Pathology, Neurology, and Internal Medicine/Medicine) in our study were noted  
51  
52 to have higher proportions of individuals spending at least 50% of their time on research, while  
53  
54  
55  
56  
57  
58  
59  
60

1  
2  
3 Family Medicine and Emergency Medicine (which were among the lowest-funded in our study)  
4  
5 had much lower proportions of faculty with more than 50% time dedicated to research [8, 9].  
6  
7

8  
9  
10 Whether specialty-choice is a driver of subsequent research-focus in physicians' careers is  
11  
12 unknown; however, it is easy to speculate that greater availability of NIH funding in certain  
13  
14 specialties may facilitate research-focused careers in those specialties. The specialties of internal  
15  
16 medicine, pathology, pediatrics, and neurology together accounted for approximately 60% of the  
17  
18 specialties in which Medical Scientist Training Program (MSTP) M.D./Ph.D. graduates attended  
19  
20 residency programs [8, 9]. Three of these specialties were the three specialties with the highest  
21  
22 amount of NIH funding per active physician. The temporal trend is difficult to assess, and it is  
23  
24 unclear which is the cause, and which is the effect. MD-PhD program graduates were more  
25  
26 likely to choose specialties like Pathology, and less likely to choose Emergency Medicine, or  
27  
28 Family Medicine [10]. MSTP graduates may be more attracted to these better funded specialties  
29  
30 because of increased NIH funding per active physician, or alternatively MSTP graduates in these  
31  
32 better funded specialties were able to acquire more NIH funding per active physician.  
33  
34  
35  
36  
37

38  
39  
40 However, the distribution of specialties pursued by MSTP graduates has changed over time, and  
41  
42 many specialties now have substantial representation [7], which means a larger proportion of  
43  
44 these MSTP graduates are in less well funded specialties. The presence of substantial numbers of  
45  
46 M.D./Ph.D.'s in specialties with lower levels of funding (e.g., the 12.9% of M.D./Ph.D.'s in  
47  
48 Pediatrics, the 7.0% in Surgical specialties, and the 4.2% in Radiation-Diagnostic/Oncology)  
49  
50 leaves the possibility of a mismatch between the supply of such well-trained physician-scientists,  
51  
52 and the amount of funding available to them, which could lead to increased competition for  
53  
54  
55  
56  
57  
58  
59

1  
2  
3 research-grants in these specialties, and increased attrition, ultimately further exacerbating the  
4 relatively lower levels of research in these specialties [7]. This problem is not unique to  
5  
6 M.D./Ph.D.'s and physicians, and may occur for nurses, nurse practitioners, public health  
7  
8 scientists, social workers, engineers, Pharmacists, Ph.D.'s, and other biomedical research  
9  
10 professionals who do research in one of the less funded specialties.  
11  
12  
13  
14  
15

16  
17 The importance of having a diverse biomedical workforce has been stressed. Diversity in  
18  
19 race/ethnicity and gender have been at the forefront of these discussions because of the  
20  
21 tremendous health disparities that exist across races/ethnicities and genders. However, this  
22  
23 research shows that there are disparities in funding based on physician specialty. The current  
24  
25 status quo makes some specialties (better NIH-funded specialties) more attractive to physician-  
26  
27 researchers. However, the inequity in NIH-funding may create significant societal problems. For  
28  
29 example, one of the worst instances of healthcare inequalities in the United States is the  
30  
31 inequality seen in the difference between Black and White maternal mortality [11]. The mortality  
32  
33 rate for non-Hispanic Black women was 3.55 times that of non-Hispanic White women [11].  
34  
35 Here, our data shows that Obstetrics and Gynecology was one of the worst NIH-funded  
36  
37 specialties. Further research is required to understand the etiology of this disparity so that the  
38  
39 NIH research dollars are appropriately distributed among all specialties.  
40  
41  
42  
43  
44  
45

46  
47 This study has a few limitations. We assumed that the size of the active physician workforce was  
48  
49 a proxy for the relative amount of clinical/public health need for given medical specialty.  
50  
51 However, deviations from proportionality may arise if the diseases treated by certain specialties  
52  
53 result in greater morbidity/mortality or cost to society and if the NIH funding depends on  
54  
55  
56  
57  
58  
59

1  
2  
3 morbidity/mortality or cost to society. There are several non-physician researchers including  
4  
5 Ph.D.'s, individuals with degrees in public health, nursing, social work, pharmacy, or  
6  
7 engineering who are funded by the NIH. These non-MD researchers may be more likely to be  
8  
9 hired in some specialties, and as a result, change the funding landscape of those specialties. The  
10  
11 categorization of grants into specialties was done by the NIH. The NIH did not provide the  
12  
13 training-backgrounds of the principal investigators (PIs). The NIH did not provide information  
14  
15 on whether the PIs were clinicians, and therefore we could not determine whether the  
16  
17 categorization was based on the specialty in which these PI was clinically practicing, or if  
18  
19 categorization was based on the clinical department that the PI was affiliated with. The analyses  
20  
21 in this study were based only on grants that were awarded and did not include any data for grant-  
22  
23 applications which were rejected to assess differences in funding rates. The grant-application  
24  
25 data is not included in the RePORTER database and can only be accessed through an internal  
26  
27 database at the NIH and was unavailable for this study. Finally, the study was limited to only the  
28  
29 principal investigator, and did not investigate the specialties of the co-investigators since this  
30  
31 data was not available in the RePORTER database.  
32  
33  
34  
35  
36  
37  
38  
39

40 In conclusion, the number of NIH grants, total dollar amount of funding, dollar amount of  
41  
42 funding per active physician, and the mean funding-amount per grant (by grant-type) vary by  
43  
44 specialty. This may affect research progress and the careers of scientists and may affect patient  
45  
46 outcomes in these less well-funded specialties. Further research is required to understand why  
47  
48 this discrepancy exists.  
49  
50  
51  
52  
53  
54  
55  
56  
57  
58  
59  
60

1  
2  
3  
4  
5  
6  
7  
8  
9  
10  
11  
12  
13  
14  
15  
16  
17  
18  
19  
20  
21  
22  
23  
24  
25  
26  
27  
28  
29  
30  
31  
32  
33  
34  
35  
36  
37  
38  
39  
40  
41  
42  
43  
44  
45  
46  
47  
48  
49  
50  
51  
52  
53  
54  
55  
56  
57  
58  
59  
60

**Figures and Tables**

Table 1: Number of grants, number of grants per active physician, dollars of funding, and dollars of funding per active physician from 2011-2020 by specialty

Table 2: Number of each grant-type from 2011-2020

For peer review only

1  
2  
3 **Figures**  
4

5 Figure 1a – Annual inflation-adjusted dollars of funding by specialty  
6

7 Figure 1b – Annual inflation-adjusted dollar-amount of grant-funding adjusted by the number of  
8  
9 active physicians  
10  
11  
12  
13  
14  
15  
16  
17  
18  
19  
20  
21  
22  
23  
24  
25  
26  
27  
28  
29  
30  
31  
32  
33  
34  
35  
36  
37  
38  
39  
40  
41  
42  
43  
44  
45  
46  
47  
48  
49  
50  
51  
52  
53  
54  
55  
56  
57  
58  
59  
60

For peer review only

### **Supplemental Figures and Tables**

Supplementary Table 1: Number of NIH training grants (F32, T32) awarded from 2011-2020 by specialty

Supplementary Table 2: Number of NIH career development grants (K01, K08, K23) awarded from 2011-2020 by specialty

Supplementary Table 3: Number of NIH advanced career grants (R01, R03, R21, P30, U01) awarded from 2011-2020 by specialty

Supplementary Table 4: Number of active physicians per awarded NIH training grant (F32, T32) from 2011-2020 by specialty

Supplementary Table 5: Number of active physicians per awarded NIH career development grant (K01, K08, K23) from 2011-2020 by specialty

Supplementary Table 6: Number of active physicians per awarded NIH advanced career grant (R01, R03, R21, P30, U01) from 2011-2020 by specialty

Supplementary Table 7: Total NIH training grant (F32, T32) funding in thousands of dollars from 2011-2020 by specialty

Supplementary Table 8: Total NIH career development grant (K01, K08, K23) funding in thousands of dollars from 2011-2020 by specialty

Supplementary Table 9: Total NIH advanced career grant (R01, R03, R21, P30, U01) funding in thousands of dollars from 2011-2020 by specialty

Supplementary Table 10: Dollar amount for each NIH training grant (F32, T32) spent per active physician from 2011-2020 by specialty

Supplementary Table 11: Dollar amount for each NIH career development grant (K01, K08, K23) spent per active physician from 2011-2020 by specialty



1  
2  
3 Supplementary Table 12: Dollar amount for each NIH advanced career grant (R01, R03, R21,  
4 P30, U01) spent per active physician from 2011-2020 by specialty

5  
6  
7 Supplementary Table 13: Mean NIH training grant (F32, T32) funding amount from 2011-2020  
8 by specialty

9  
10  
11 Supplementary Table 14: Mean NIH career development grant (K01, K08, K23) funding amount  
12 from 2011-2020 by specialty

13  
14  
15 Supplementary Table 15: Mean NIH advanced career grant (R01, R03, R21, P30, U01) funding  
16 amount from 2011-2020 by specialty

## Supplementary Figures

Supplementary Figure 1a: Number of Grants awarded per year by specialty

Supplementary Figure 1b: Number of Grants awarded per year by specialty (without Internal Medicine)

Supplementary Figure 2: Annual percent change in number of awarded grants (compared to 2011) by specialty

Supplementary Figure 3: F32 grant dollar amount comparisons P-values

Supplementary Figure 3 caption:

Red –  $P < 0.0002924$ ; Yellow –  $0.0002924 \leq P < 0.05$ ; Green –  $P \geq 0.05$ ; Gray – Insufficient data for comparison

Supplementary Figure 4: T32 grant dollar amount comparisons P-values

Supplementary Figure 4 caption:

Red –  $P < 0.0002924$ ; Yellow –  $0.0002924 \leq P < 0.05$ ; Green –  $P \geq 0.05$ ; Gray – Insufficient data for comparison

Supplementary Figure 5: K01 grant dollar amount comparisons P-values

Supplementary Figure 5 caption:

Red –  $P < 0.0002924$ ; Yellow –  $0.0002924 \leq P < 0.05$ ; Green –  $P \geq 0.05$ ; Gray – Insufficient data for comparison

Supplementary Figure 6: K08 grant dollar amount comparisons P-values

Supplementary Figure 6 caption:

1  
2  
3 Red –  $P < 0.0002924$ ; Yellow –  $0.0002924 \leq P < 0.05$ ; Green –  $P \geq 0.05$ ; Gray – Insufficient data  
4  
5 for comparison

6  
7  
8 Supplementary Figure 7: K23 grant dollar amount comparisons P-values

9  
10 Supplementary Figure 7 caption:

11  
12 Red –  $P < 0.0002924$ ; Yellow –  $0.0002924 \leq P < 0.05$ ; Green –  $P \geq 0.05$ ; Gray – Insufficient data  
13  
14 for comparison

15  
16  
17 Supplementary Figure 8: R01 grant dollar amount comparisons P-values

18  
19 Supplementary Figure 8 caption:

20  
21 Red –  $P < 0.0002924$ ; Yellow –  $0.0002924 \leq P < 0.05$ ; Green –  $P \geq 0.05$ ; Gray – Insufficient data  
22  
23 for comparison

24  
25  
26 Supplementary Figure 9: R03 grant dollar amount comparisons P-values

27  
28 Supplementary Figure 9 caption:

29  
30 Red –  $P < 0.0002924$ ; Yellow –  $0.0002924 \leq P < 0.05$ ; Green –  $P \geq 0.05$ ; Gray – Insufficient data  
31  
32 for comparison

33  
34  
35 Supplementary Figure 10: R21 grant dollar amount comparisons P-values

36  
37 Supplementary Figure 10 caption:

38  
39 Red –  $P < 0.0002924$ ; Yellow –  $0.0002924 \leq P < 0.05$ ; Green –  $P \geq 0.05$ ; Gray – Insufficient data  
40  
41 for comparison

42  
43  
44 Supplementary Figure 11: P30 grant dollar amount comparisons P-values

45  
46 Supplementary Figure 11 caption:

47  
48 Red –  $P < 0.0002924$ ; Yellow –  $0.0002924 \leq P < 0.05$ ; Green –  $P \geq 0.05$ ; Gray – Insufficient data  
49  
50 for comparison

51  
52  
53 Supplementary Figure 12: U011 grant dollar amount comparisons P-values

1  
2  
3  
4  
5  
6  
7  
8  
9  
10  
11  
12  
13  
14  
15  
16  
17  
18  
19  
20  
21  
22  
23  
24  
25  
26  
27  
28  
29  
30  
31  
32  
33  
34  
35  
36  
37  
38  
39  
40  
41  
42  
43  
44  
45  
46  
47  
48  
49  
50  
51  
52  
53  
54  
55  
56  
57  
58  
59  
60

Supplementary Figure 12 caption:

Red –  $P < 0.0002924$ ; Yellow –  $0.0002924 \leq P < 0.05$ ; Green –  $P \geq 0.05$ ; Gray – Insufficient data for comparison

For peer review only

1  
2  
3 **Contributorship Statement:** AS and RS analyzed the data and drafted and revised the paper.  
4  
5 RS conceived of the presented idea. Both authors contributed equally to this work.  
6

7  
8 **Competing Interests:** The authors have no competing interests to disclose.  
9

10 **Funding Statement:** This research received no specific grant from any funding agency in the  
11  
12 public, commercial or not-for-profit sectors.  
13

14 **Data-Sharing Statement:** No data are available.  
15

16  
17 **Ethics Statement:** This study was evaluated by the local Institutional Review Board (IRB). The  
18  
19 study involves freely available, public data, and was determined to be exempt.  
20  
21  
22  
23  
24  
25  
26  
27  
28  
29  
30  
31  
32  
33  
34  
35  
36  
37  
38  
39  
40  
41  
42  
43  
44  
45  
46  
47  
48  
49  
50  
51  
52  
53  
54  
55  
56  
57  
58  
59  
60

## **References**

1. National Institutes of Health (NIH). 2021. *Budget*. [online] Available at: <https://www.nih.gov/about-nih/what-we-do/budget> [Accessed 25 August 2021].
2. Healthy Funding: The Critical Role of Investing in NIH to Boost Health and Lower Costs. Robert D. Atkinson, Information Technology & Innovation Foundation, March 25, 2019. <https://itif.org/publications/2019/03/25/healthy-funding-critical-role-investing-nih-boost-health-and-lower-costs> [dataset]
3. RePORT > RePORTER [Internet]. Reporter.nih.gov. 2021 [cited 2021 Mar 29]; Available from: <https://reporter.nih.gov/advanced-search>
4. 2020 Key Definitions, Commonly Used Acronyms, and Practice Specialties [Internet]. AAMC. 2021 [cited 2021 May 17]; Available from: <https://www.aamc.org/data-reports/workforce/interactive-data/2020-key-definitions-commonly-used-acronyms-and-practice-specialties> [dataset]
5. Number of People per Active Physician by Specialty, 2019 [Internet]. AAMC. 2021 [cited 2021 May 10]; Available from: <https://www.aamc.org/what-we-do/mission-areas/health-care/workforce-studies/interactive-data/number-people-active-physician-specialty-2019> [dataset]
6. Gross Domestic Product Price Index, 2022 [Internet]. NIH Office of Budget. 2022 [cited 2022 June 16]; Available from: <https://officeofbudget.od.nih.gov/gbipriceindexes.html>
7. Akabas MH, Brass LF. The national MD-PhD program outcomes study: Relationships between medical specialty, training duration, research effort, and career paths. *JCI Insight*. 2019;4(19):133009.

- 1  
2  
3 8. Akabas MH, Brass LF. The national MD-PhD program outcomes study: Outcomes variation  
4 by sex, race, and ethnicity. *JCI Insight*. 2019;4(19):133010.  
5  
6  
7  
8 9. Brass LF, Akabas MH, Burnley LD, Engman DM, Wiley CA, Andersen OS. Are MD-PhD  
9 programs meeting their goals? An analysis of career choices made by graduates of 24 MD-PhD  
10 programs. *Acad Med*. 2010;85(4):692-701. doi:10.1097/ACM.0b013e3181d3ca17  
11  
12  
13  
14 10. Andriole DA, Whelan AJ, Jeffe DB. Characteristics and career intentions of the emerging  
15 MD/PhD workforce. *JAMA*. 2008 Sep 10;300(10):1165-73. doi: 10.1001/jama.300.10.1165.  
16  
17  
18  
19 PMID: 18780845.  
20  
21 11. MacDorman MF, Thoma M, Declercq E, Howell EA. Racial and Ethnic Disparities in  
22 Maternal Mortality in the United States Using Enhanced Vital Records, 2016–2017. *Am J Public*  
23  
24  
25  
26  
27  
28  
29  
30  
31  
32  
33  
34  
35  
36  
37  
38  
39  
40  
41  
42  
43  
44  
45  
46  
47  
48  
49  
50  
51  
52  
53  
54  
55  
56  
57  
58  
59  
60

Annual inflation-adjusted dollars of funding by specialty

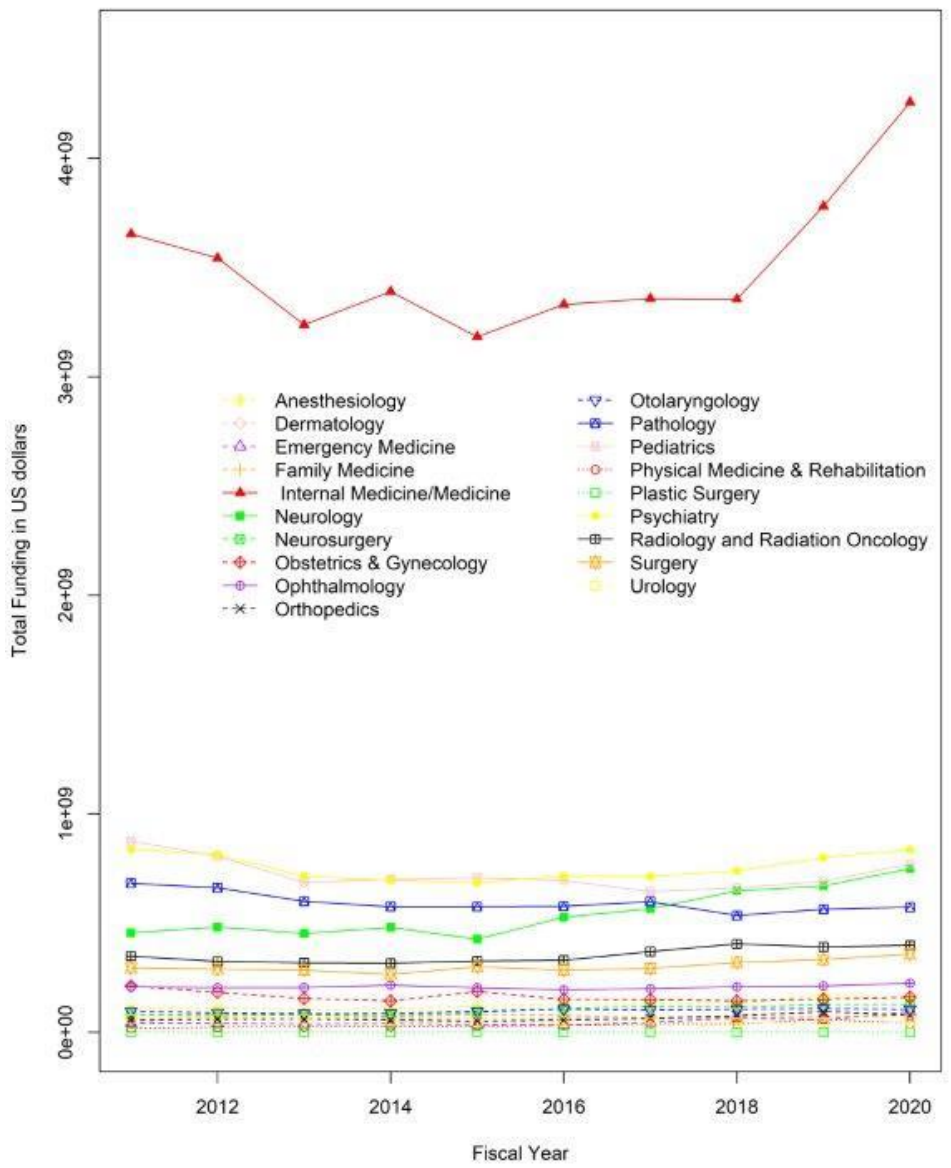

Annual inflation-adjusted dollars of funding per active physician by specialty

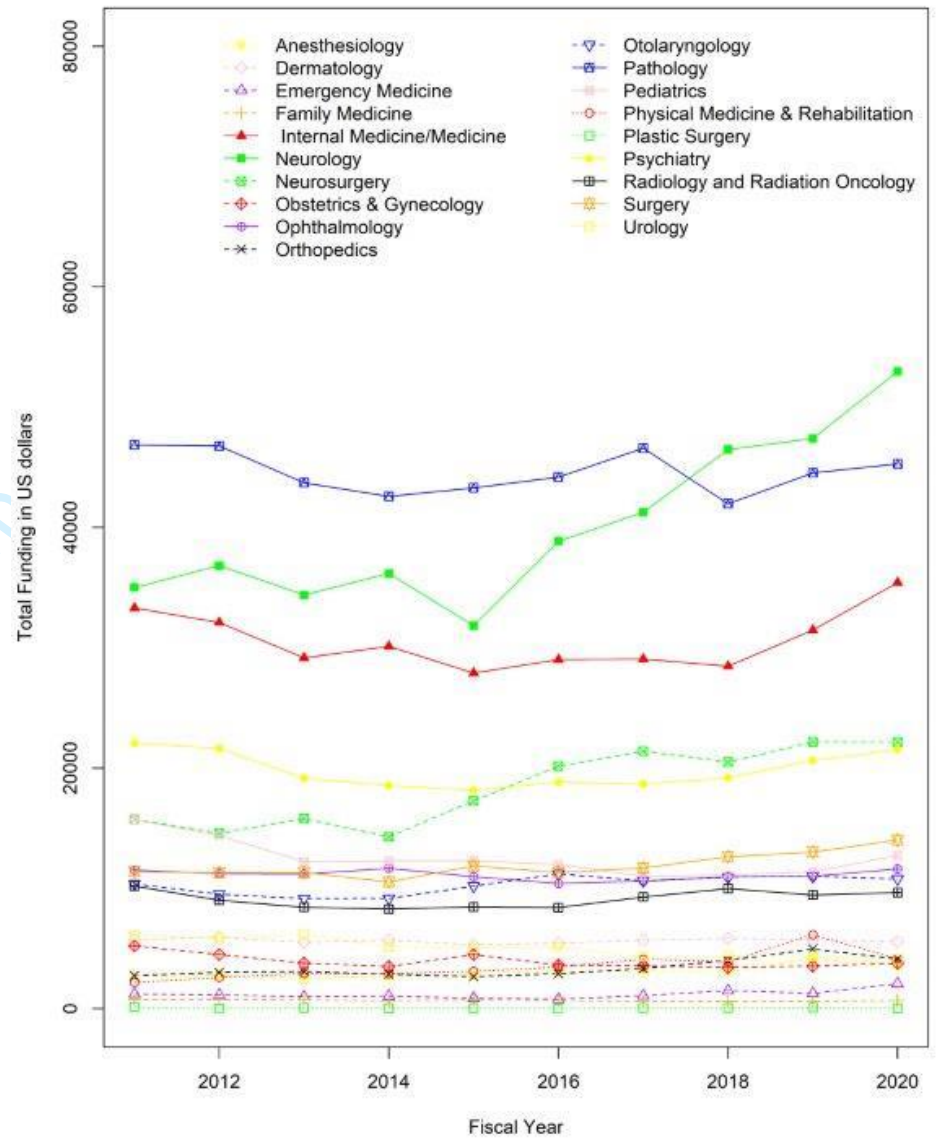



1  
2  
3  
4  
5  
6  
7  
8  
9  
10  
11  
12  
13  
14  
15  
16  
17  
18  
19  
20  
21  
22  
23  
24  
25  
26  
27  
28  
29  
30  
31  
32  
33  
34  
35  
36  
37  
38  
39  
40  
41  
42  
43  
44  
45  
46  
47  
48  
49  
50  
51  
52  
53  
54  
55  
56  
57  
58  
59  
60

Number of all Grants awarded per year by specialty

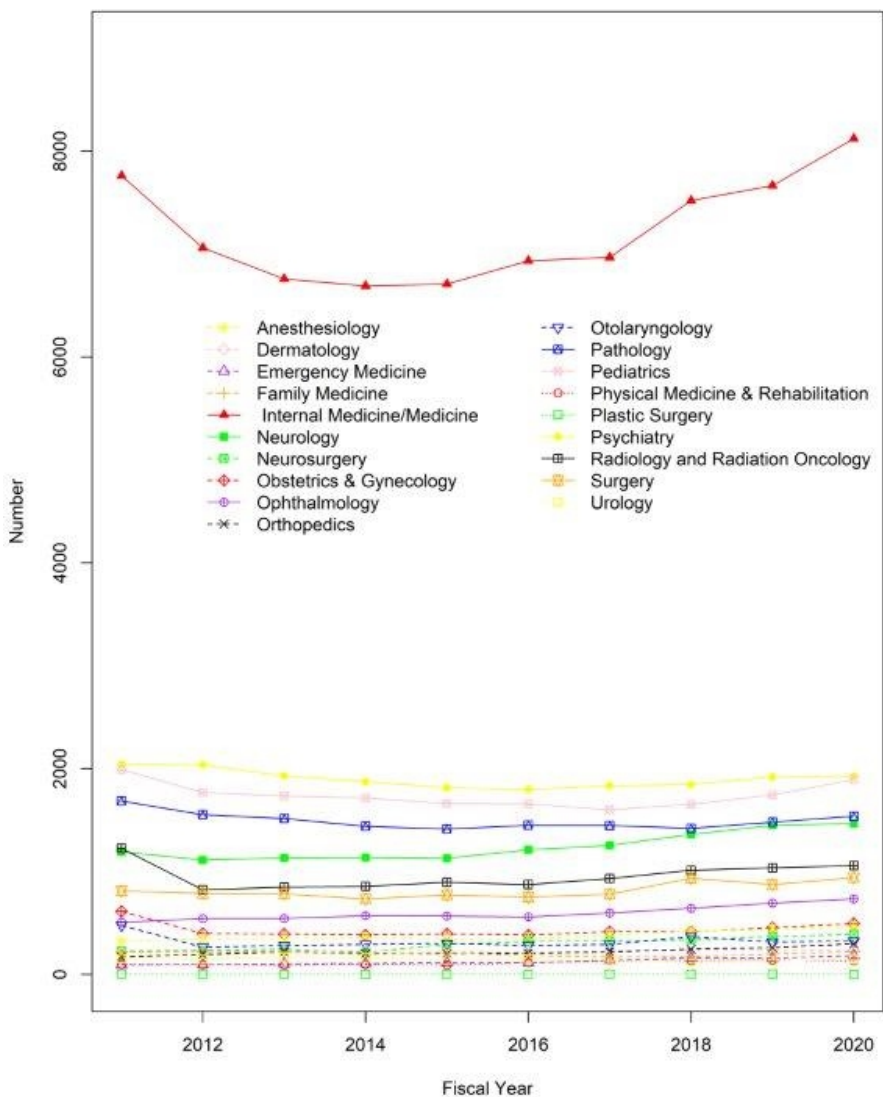

156x203mm (96 x 96 DPI)

1  
2  
3  
4  
5  
6  
7  
8  
9  
10  
11  
12  
13  
14  
15  
16  
17  
18  
19  
20  
21  
22  
23  
24  
25  
26  
27  
28  
29  
30  
31  
32  
33  
34  
35  
36  
37  
38  
39  
40  
41  
42  
43  
44  
45  
46  
47  
48  
49  
50  
51  
52  
53  
54  
55  
56  
57  
58  
59  
60

Number of all Grants awarded per year by specialty (without Internal Medicine)

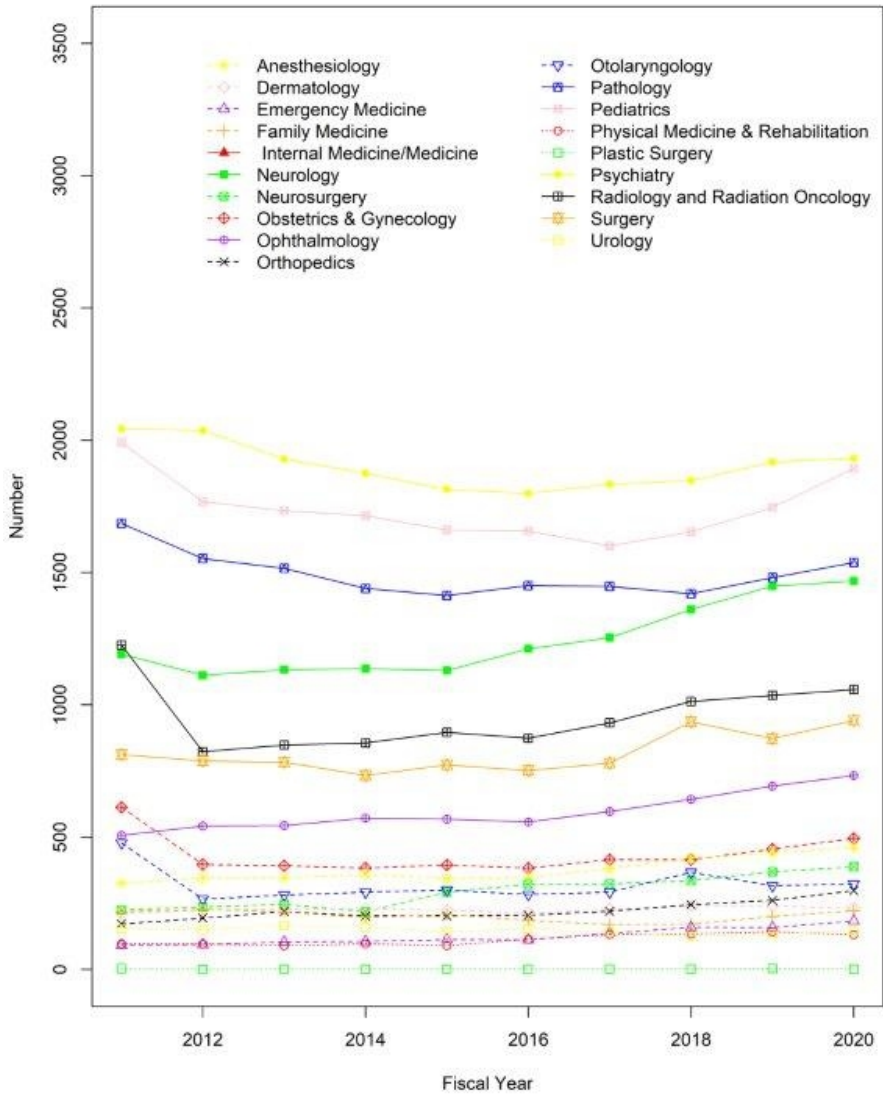

156x203mm (96 x 96 DPI)

Annual percent change in number of awarded grants (compared to 2011) by specialty

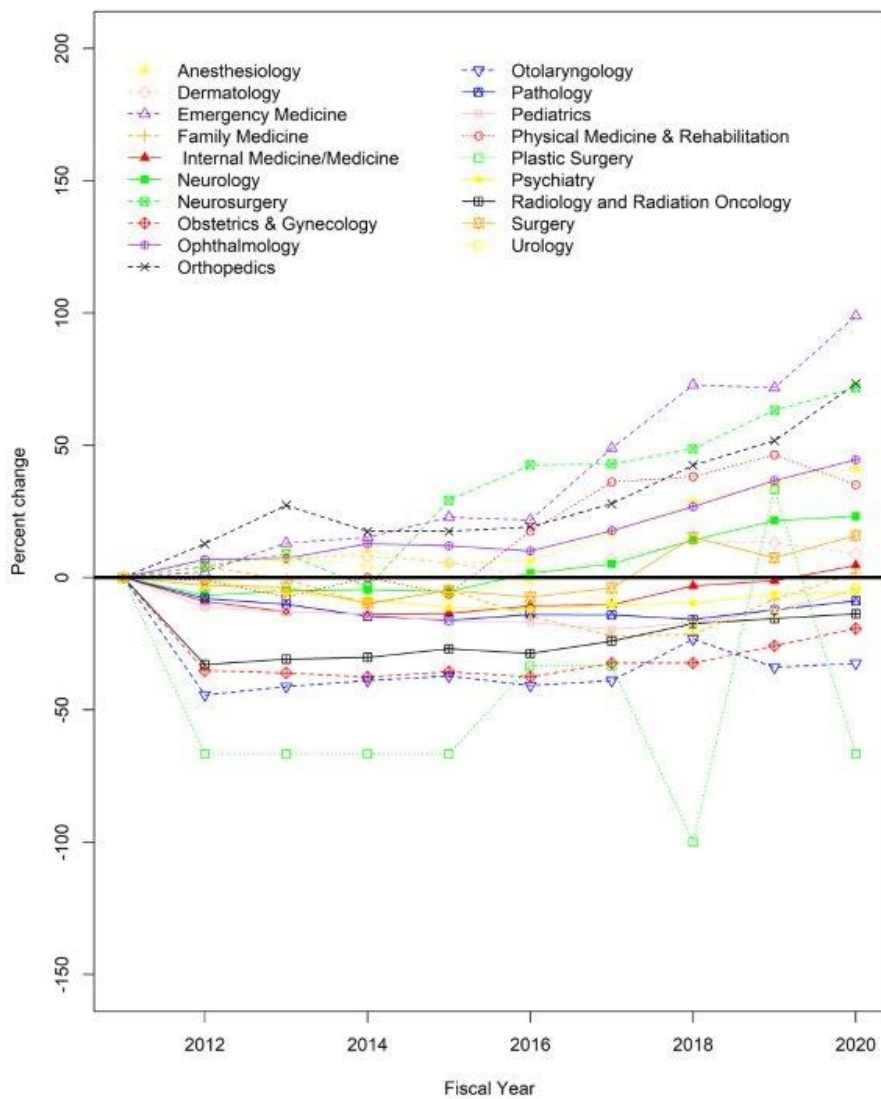

156x203mm (96 x 96 DPI)

1  
2  
3  
4  
5  
6  
7  
8  
9  
10  
11  
12  
13  
14  
15  
16  
17  
18  
19  
20  
21  
22  
23  
24  
25  
26  
27  
28  
29  
30  
31  
32  
33  
34  
35  
36  
37  
38  
39  
40  
41  
42  
43  
44  
45  
46  
47  
48  
49  
50  
51  
52  
53  
54  
55  
56  
57  
58  
59  
60

F32 grant dollar amount comparisons P-values

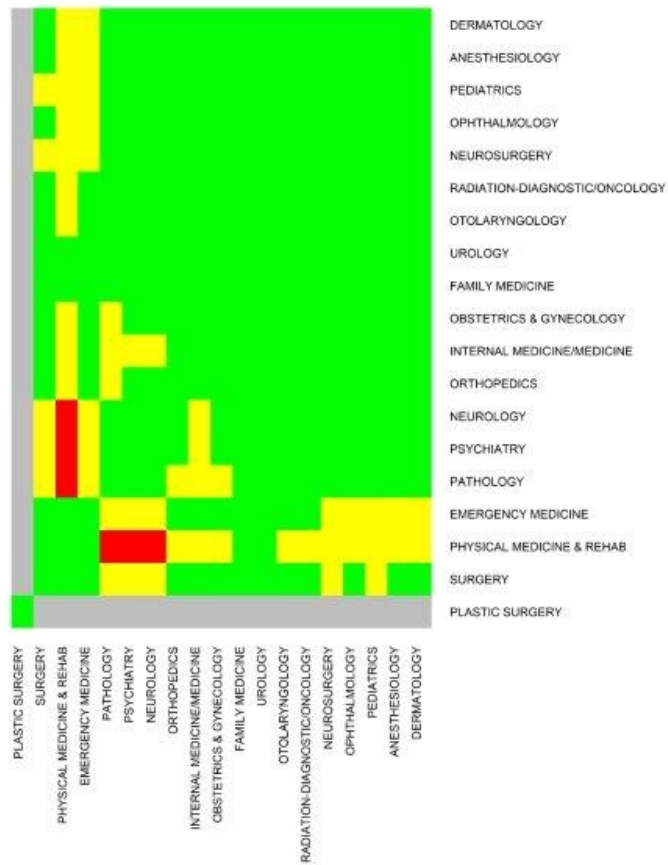

156x203mm (96 x 96 DPI)



1  
2  
3  
4  
5  
6  
7  
8  
9  
10  
11  
12  
13  
14  
15  
16  
17  
18  
19  
20  
21  
22  
23  
24  
25  
26  
27  
28  
29  
30  
31  
32  
33  
34  
35  
36  
37  
38  
39  
40  
41  
42  
43  
44  
45  
46  
47  
48  
49  
50  
51  
52  
53  
54  
55  
56  
57  
58  
59  
60

**K01 grant dollar amount comparisons P-values**

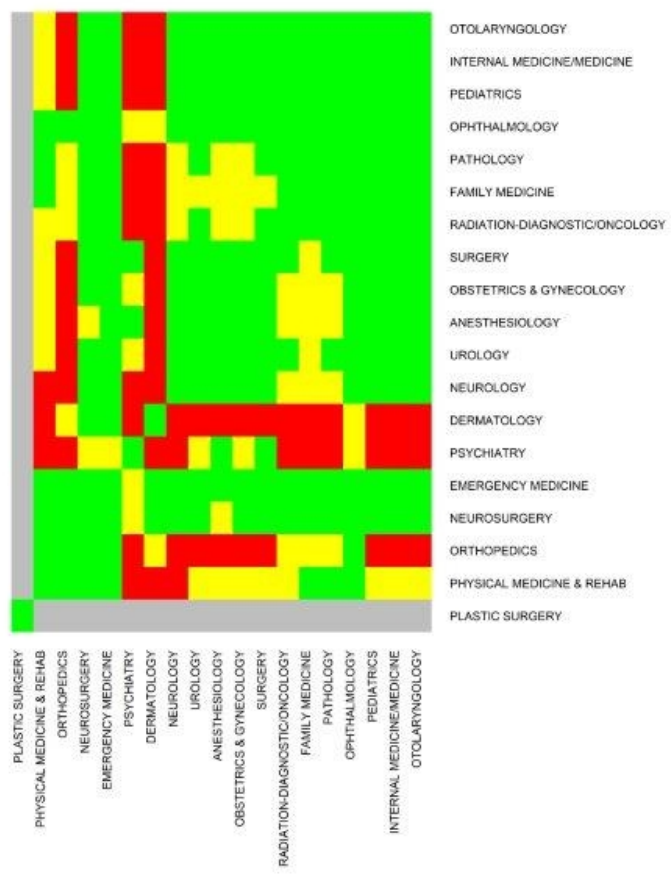

156x203mm (96 x 96 DPI)

K08 grant dollar amount comparisons P-values

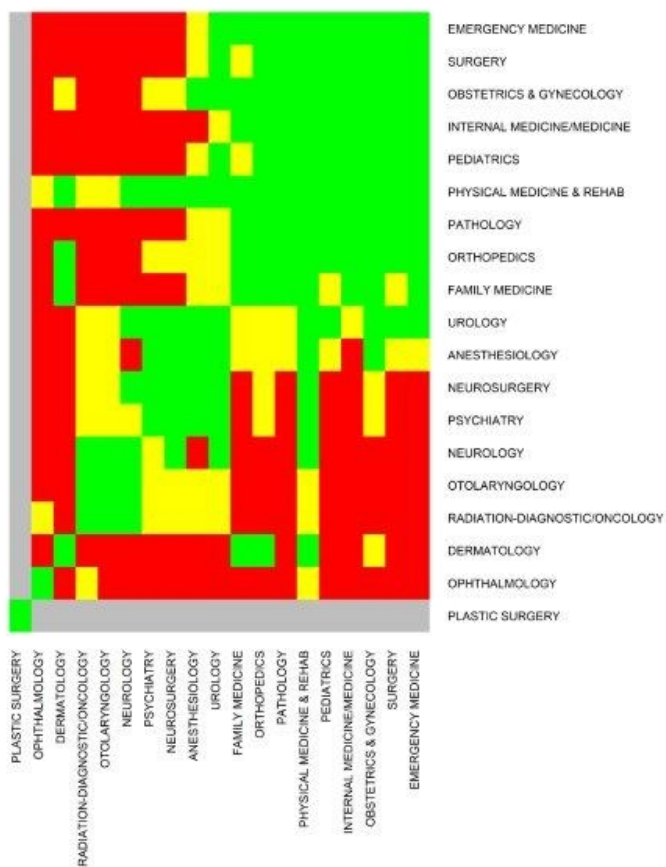

156x203mm (96 x 96 DPI)

1  
2  
3  
4  
5  
6  
7  
8  
9  
10  
11  
12  
13  
14  
15  
16  
17  
18  
19  
20  
21  
22  
23  
24  
25  
26  
27  
28  
29  
30  
31  
32  
33  
34  
35  
36  
37  
38  
39  
40  
41  
42  
43  
44  
45  
46  
47  
48  
49  
50  
51  
52  
53  
54  
55  
56  
57  
58  
59  
60

**K23 grant dollar amount comparisons P-values**

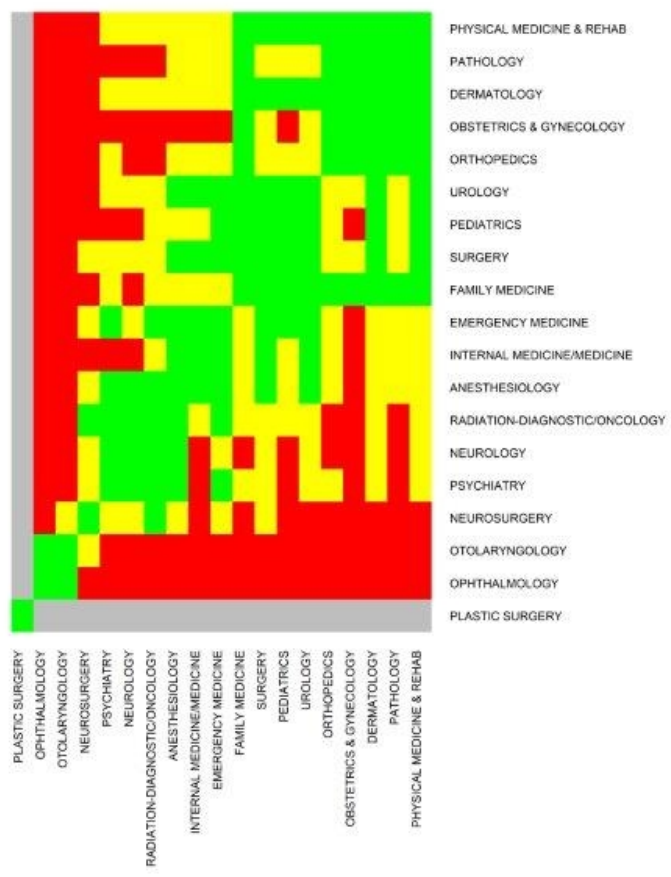

156x203mm (96 x 96 DPI)



R01 grant dollar amount comparisons P-values

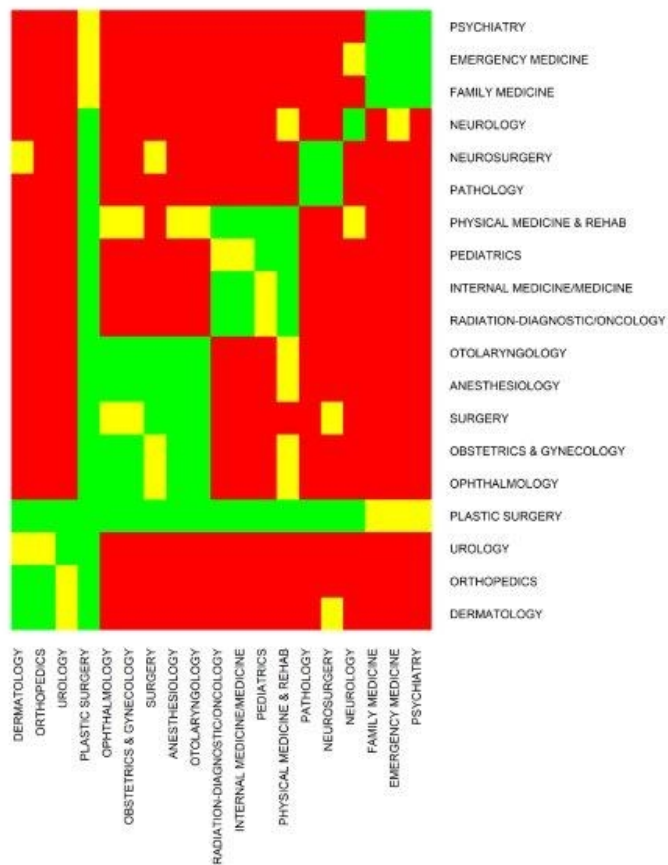

156x203mm (96 x 96 DPI)

1  
2  
3  
4  
5  
6  
7  
8  
9  
10  
11  
12  
13  
14  
15  
16  
17  
18  
19  
20  
21  
22  
23  
24  
25  
26  
27  
28  
29  
30  
31  
32  
33  
34  
35  
36  
37  
38  
39  
40  
41  
42  
43  
44  
45  
46  
47  
48  
49  
50  
51  
52  
53  
54  
55  
56  
57  
58  
59  
60

R03 grant dollar amount comparisons P-values

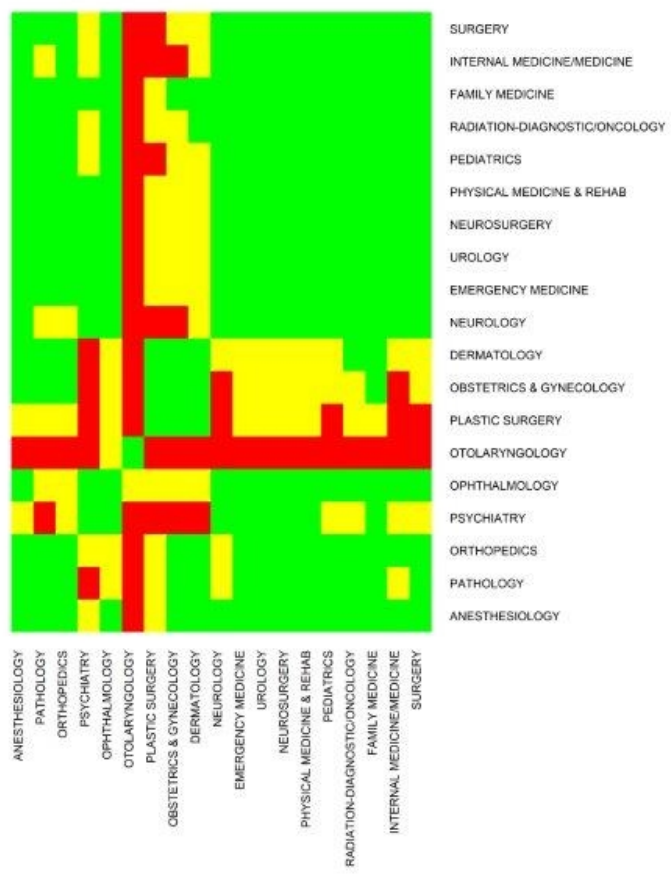

156x203mm (96 x 96 DPI)

1  
2  
3  
4  
5  
6  
7  
8  
9  
10  
11  
12  
13  
14  
15  
16  
17  
18  
19  
20  
21  
22  
23  
24  
25  
26  
27  
28  
29  
30  
31  
32  
33  
34  
35  
36  
37  
38  
39  
40  
41  
42  
43  
44  
45  
46  
47  
48  
49  
50  
51  
52  
53  
54  
55  
56  
57  
58  
59  
60

R21 grant dollar amount comparisons P-values

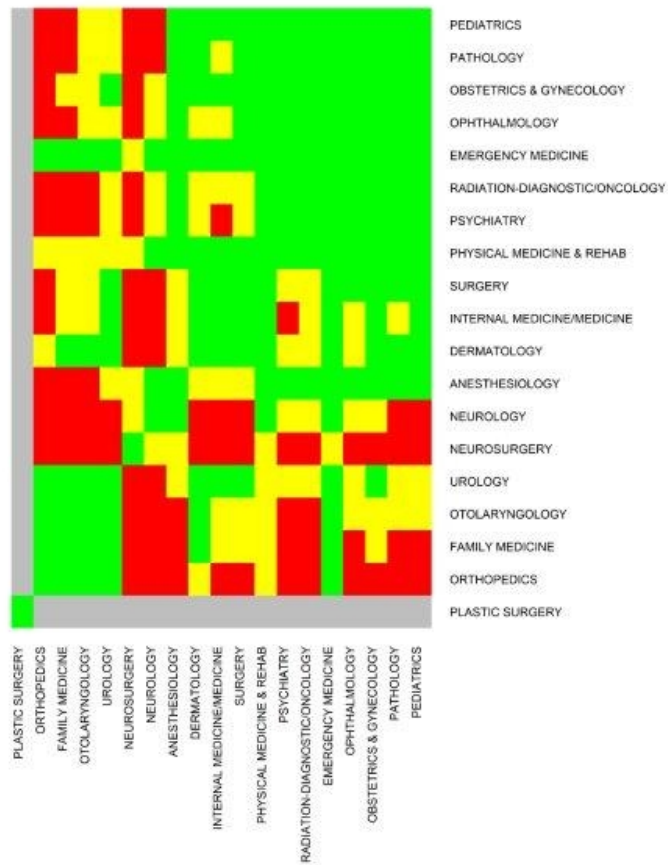

156x203mm (96 x 96 DPI)

1  
2  
3  
4  
5  
6  
7  
8  
9  
10  
11  
12  
13  
14  
15  
16  
17  
18  
19  
20  
21  
22  
23  
24  
25  
26  
27  
28  
29  
30  
31  
32  
33  
34  
35  
36  
37  
38  
39  
40  
41  
42  
43  
44  
45  
46  
47  
48  
49  
50  
51  
52  
53  
54  
55  
56  
57  
58  
59  
60

**P30 grant dollar amount comparisons P-values**

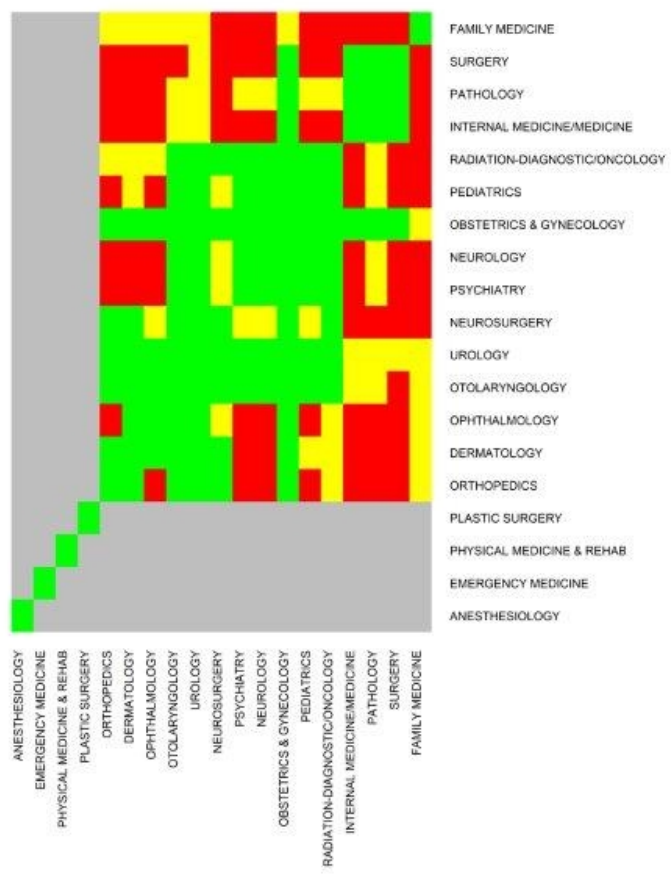

156x203mm (96 x 96 DPI)

U01 grant dollar amount comparisons P-values

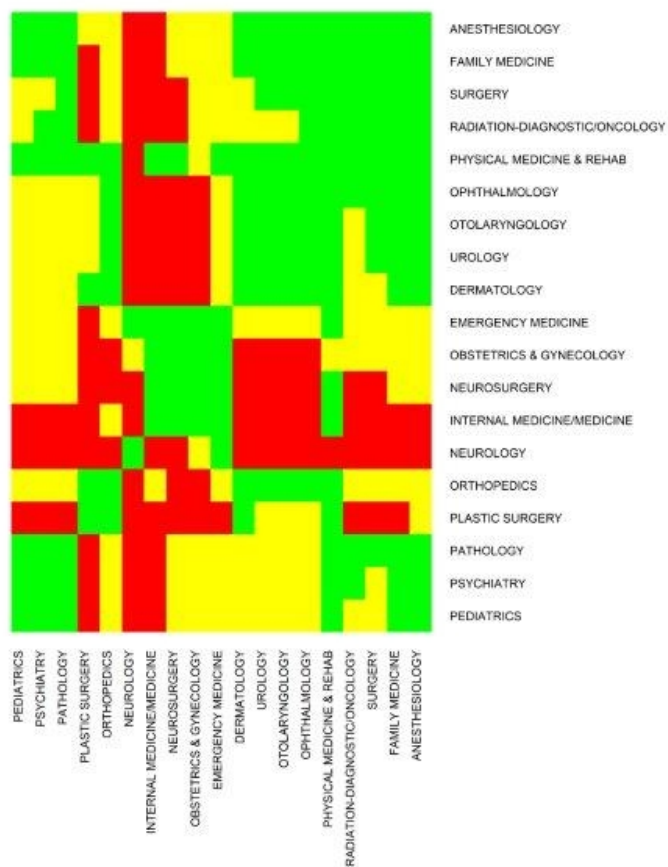

156x203mm (96 x 96 DPI)

Supplementary Table 1 : Number of NIH training grants (F32, T32) awarded from 2011-2020 by specialty

| F32 grants                    | 2011 | 2012 | 2013 | 2014 | 2015 | 2016 | 2017 | 2018 | 2019 | 2020 |
|-------------------------------|------|------|------|------|------|------|------|------|------|------|
| Anesthesiology                | 4    | 6    | 8    | 7    | 1    | 1    | 3    | 5    | 2    | 6    |
| Dermatology                   | 4    | 4    | 3    | 2    | 3    | 3    | 5    | 4    | 1    | 3    |
| Emergency Medicine            | 1    | 1    | 1    | 0    | 0    | 0    | 0    | 0    | 0    | 1    |
| Family Medicine               | 0    | 0    | 0    | 1    | 1    | 0    | 0    | 0    | 0    | 0    |
| Internal Medicine/Medicine    | 126  | 112  | 116  | 108  | 109  | 119  | 132  | 115  | 108  | 116  |
| Neurology                     | 15   | 10   | 20   | 31   | 29   | 23   | 29   | 27   | 29   | 22   |
| Neurosurgery                  | 8    | 8    | 8    | 8    | 10   | 10   | 9    | 15   | 8    | 12   |
| Obstetrics and Gynecology     | 4    | 6    | 4    | 4    | 5    | 4    | 3    | 6    | 5    | 5    |
| Ophthalmology                 | 4    | 7    | 7    | 9    | 12   | 8    | 10   | 7    | 9    | 10   |
| Orthopedics                   | 5    | 6    | 5    | 5    | 6    | 6    | 6    | 7    | 7    | 7    |
| Otolaryngology                | 10   | 7    | 7    | 10   | 6    | 8    | 14   | 10   | 8    | 6    |
| Pathology                     | 22   | 17   | 22   | 22   | 23   | 25   | 24   | 17   | 16   | 13   |
| Pediatrics                    | 25   | 27   | 24   | 24   | 18   | 17   | 15   | 13   | 19   | 12   |
| Physical Medicine & Rehab     | 1    | 1    | 0    | 1    | 1    | 1    | 3    | 4    | 3    | 2    |
| Plastic Surgery               | 0    | 0    | 0    | 0    | 0    | 0    | 0    | 0    | 1    | 0    |
| Psychiatry                    | 39   | 29   | 28   | 26   | 27   | 29   | 29   | 25   | 29   | 32   |
| Radiation-Diagnostic/Oncology | 14   | 8    | 5    | 1    | 2    | 9    | 8    | 7    | 4    | 7    |
| Surgery                       | 17   | 15   | 13   | 19   | 21   | 20   | 17   | 20   | 15   | 15   |
| Urology                       | 2    | 2    | 2    | 5    | 2    | 3    | 3    | 1    | 1    | 1    |
| T32                           | 2011 | 2012 | 2013 | 2014 | 2015 | 2016 | 2017 | 2018 | 2019 | 2020 |
| Anesthesiology                | 13   | 15   | 14   | 17   | 21   | 19   | 25   | 19   | 20   | 15   |
| Dermatology                   | 12   | 12   | 12   | 11   | 11   | 11   | 11   | 10   | 7    | 8    |
| Emergency Medicine            | 0    | 0    | 0    | 0    | 0    | 1    | 2    | 2    | 2    | 2    |
| Family Medicine               | 5    | 4    | 6    | 5    | 4    | 4    | 9    | 5    | 4    | 5    |
| Internal Medicine/Medicine    | 382  | 389  | 357  | 353  | 339  | 341  | 452  | 366  | 347  | 365  |
| Neurology                     | 37   | 34   | 32   | 32   | 29   | 30   | 38   | 36   | 35   | 37   |
| Neurosurgery                  | 3    | 3    | 3    | 3    | 5    | 5    | 6    | 4    | 6    | 8    |
| Obstetrics and Gynecology     | 12   | 11   | 12   | 11   | 12   | 10   | 13   | 7    | 8    | 11   |
| Ophthalmology                 | 15   | 16   | 21   | 19   | 17   | 18   | 27   | 22   | 26   | 23   |
| Orthopedics                   | 8    | 9    | 8    | 7    | 7    | 7    | 8    | 7    | 7    | 8    |
| Otolaryngology                | 12   | 12   | 11   | 14   | 15   | 15   | 29   | 17   | 16   | 16   |
| Pathology                     | 86   | 75   | 70   | 79   | 68   | 70   | 89   | 67   | 59   | 55   |
| Pediatrics                    | 108  | 99   | 90   | 87   | 90   | 84   | 88   | 73   | 74   | 72   |
| Physical Medicine & Rehab     | 9    | 4    | 4    | 3    | 3    | 4    | 5    | 5    | 4    | 5    |
| Plastic Surgery               | 0    | 0    | 0    | 0    | 0    | 0    | 0    | 0    | 0    | 0    |
| Psychiatry                    | 77   | 79   | 80   | 79   | 71   | 71   | 107  | 69   | 68   | 71   |
| Radiation-Diagnostic/Oncology | 22   | 20   | 22   | 26   | 28   | 27   | 33   | 32   | 30   | 26   |
| Surgery                       | 54   | 56   | 54   | 48   | 48   | 49   | 57   | 53   | 58   | 55   |
| Urology                       | 7    | 8    | 7    | 8    | 5    | 6    | 4    | 2    | 4    | 4    |

Supplementary Table 2: Number of NIH career development grants (K01, K08, K23) awarded from 2011-2020 by specialty

| K01                           | 2011 | 2012 | 2013 | 2014 | 2015 | 2016 | 2017 | 2018 | 2019 | 2020 |
|-------------------------------|------|------|------|------|------|------|------|------|------|------|
| Anesthesiology                | 4    | 4    | 4    | 5    | 5    | 5    | 6    | 8    | 5    | 7    |
| Dermatology                   | 4    | 4    | 6    | 4    | 6    | 7    | 11   | 13   | 10   | 8    |
| Emergency Medicine            | 0    | 1    | 1    | 1    | 2    | 0    | 0    | 1    | 1    | 2    |
| Family Medicine               | 11   | 13   | 10   | 7    | 7    | 8    | 8    | 9    | 9    | 15   |
| Internal Medicine/Medicine    | 130  | 125  | 126  | 144  | 159  | 143  | 135  | 154  | 170  | 176  |
| Neurology                     | 12   | 13   | 16   | 17   | 17   | 19   | 20   | 19   | 23   | 19   |
| Neurosurgery                  | 3    | 3    | 1    | 0    | 0    | 1    | 0    | 2    | 3    | 3    |
| Obstetrics and Gynecology     | 2    | 1    | 2    | 4    | 5    | 5    | 7    | 6    | 8    | 8    |
| Ophthalmology                 | 0    | 0    | 0    | 1    | 0    | 0    | 1    | 2    | 2    | 1    |
| Orthopedics                   | 5    | 4    | 7    | 7    | 10   | 7    | 6    | 5    | 6    | 5    |
| Otolaryngology                | 2    | 2    | 2    | 2    | 0    | 0    | 0    | 0    | 0    | 1    |
| Pathology                     | 13   | 14   | 15   | 14   | 13   | 12   | 13   | 16   | 17   | 21   |
| Pediatrics                    | 20   | 16   | 18   | 19   | 16   | 25   | 23   | 21   | 23   | 27   |
| Physical Medicine & Rehab     | 3    | 4    | 4    | 6    | 7    | 8    | 13   | 13   | 10   | 12   |
| Plastic Surgery               | 0    | 0    | 0    | 0    | 0    | 0    | 0    | 0    | 0    | 0    |
| Psychiatry                    | 81   | 84   | 76   | 75   | 72   | 67   | 70   | 65   | 72   | 81   |
| Radiation-Diagnostic/Oncology | 17   | 15   | 13   | 11   | 14   | 14   | 19   | 18   | 15   | 11   |
| Surgery                       | 8    | 7    | 11   | 7    | 10   | 12   | 13   | 9    | 8    | 7    |
| Urology                       | 1    | 1    | 1    | 1    | 3    | 4    | 6    | 5    | 5    | 6    |
| K08                           | 2011 | 2012 | 2013 | 2014 | 2015 | 2016 | 2017 | 2018 | 2019 | 2020 |
| Anesthesiology                | 13   | 14   | 15   | 15   | 13   | 12   | 16   | 21   | 25   | 23   |
| Dermatology                   | 18   | 19   | 17   | 16   | 15   | 12   | 14   | 11   | 14   | 10   |
| Emergency Medicine            | 2    | 4    | 7    | 4    | 5    | 7    | 7    | 8    | 7    | 7    |
| Family Medicine               | 5    | 5    | 5    | 2    | 1    | 1    | 1    | 1    | 3    | 3    |
| Internal Medicine/Medicine    | 277  | 270  | 243  | 0    | 228  | 241  | 230  | 251  | 281  | 274  |
| Neurology                     | 39   | 36   | 39   | 33   | 37   | 33   | 31   | 30   | 35   | 39   |
| Neurosurgery                  | 7    | 7    | 9    | 7    | 11   | 12   | 14   | 11   | 13   | 10   |
| Obstetrics and Gynecology     | 8    | 8    | 7    | 5    | 2    | 3    | 2    | 5    | 6    | 9    |
| Ophthalmology                 | 24   | 24   | 29   | 29   | 30   | 28   | 27   | 27   | 25   | 25   |
| Orthopedics                   | 1    | 2    | 4    | 4    | 4    | 5    | 7    | 7    | 7    | 7    |
| Otolaryngology                | 12   | 14   | 12   | 10   | 12   | 11   | 9    | 10   | 12   | 10   |
| Pathology                     | 38   | 33   | 36   | 33   | 32   | 24   | 25   | 28   | 27   | 30   |
| Pediatrics                    | 114  | 96   | 93   | 86   | 82   | 91   | 106  | 117  | 113  | 109  |
| Physical Medicine & Rehab     | 1    | 1    | 1    | 0    | 0    | 0    | 0    | 1    | 1    | 1    |
| Plastic Surgery               | 0    | 0    | 0    | 0    | 0    | 0    | 0    | 0    | 0    | 0    |
| Psychiatry                    | 34   | 31   | 21   | 28   | 22   | 23   | 25   | 23   | 19   | 24   |
| Radiation-Diagnostic/Oncology | 5    | 5    | 5    | 6    | 6    | 1    | 3    | 3    | 14   | 18   |
| Surgery                       | 59   | 57   | 50   | 46   | 38   | 38   | 39   | 44   | 45   | 48   |

|                               | 8           | 8           | 11          | 7           | 4           | 5           | 5           | 5           | 5           | 5           |
|-------------------------------|-------------|-------------|-------------|-------------|-------------|-------------|-------------|-------------|-------------|-------------|
| Urology                       |             |             |             |             |             |             |             |             |             |             |
| <b>K23</b>                    | <b>2011</b> | <b>2012</b> | <b>2013</b> | <b>2014</b> | <b>2015</b> | <b>2016</b> | <b>2017</b> | <b>2018</b> | <b>2019</b> | <b>2020</b> |
| Anesthesiology                | 9           | 10          | 13          | 13          | 12          | 10          | 13          | 12          | 17          | 17          |
| Dermatology                   | 3           | 4           | 3           | 1           | 3           | 4           | 4           | 9           | 10          | 8           |
| Emergency Medicine            | 18          | 15          | 15          | 14          | 15          | 19          | 21          | 19          | 20          | 15          |
| Family Medicine               | 9           | 8           | 6           | 3           | 6           | 4           | 5           | 5           | 6           | 7           |
| Internal Medicine/Medicine    | 306         | 315         | 306         | 297         | 276         | 262         | 247         | 247         | 249         | 286         |
| Neurology                     | 61          | 59          | 48          | 50          | 52          | 43          | 48          | 53          | 58          | 57          |
| Neurosurgery                  | 2           | 4           | 5           | 4           | 5           | 5           | 4           | 4           | 5           | 6           |
| Obstetrics and Gynecology     | 12          | 14          | 11          | 14          | 10          | 5           | 7           | 8           | 10          | 12          |
| Ophthalmology                 | 15          | 11          | 13          | 11          | 13          | 20          | 21          | 21          | 21          | 20          |
| Orthopedics                   | 2           | 3           | 3           | 3           | 2           | 2           | 1           | 3           | 3           | 4           |
| Otolaryngology                | 8           | 6           | 6           | 9           | 12          | 11          | 12          | 12          | 12          | 12          |
| Pathology                     | 4           | 3           | 2           | 3           | 2           | 1           | 1           | 1           | 1           | 3           |
| Pediatrics                    | 94          | 93          | 89          | 89          | 79          | 65          | 85          | 93          | 108         | 129         |
| Physical Medicine & Rehab     | 7           | 6           | 10          | 12          | 9           | 10          | 6           | 2           | 3           | 3           |
| Plastic Surgery               | 0           | 0           | 0           | 0           | 0           | 0           | 0           | 0           | 0           | 0           |
| Psychiatry                    | 119         | 117         | 104         | 99          | 100         | 93          | 102         | 103         | 110         | 113         |
| Radiation-Diagnostic/Oncology | 6           | 4           | 4           | 4           | 4           | 4           | 4           | 2           | 1           | 3           |
| Surgery                       | 13          | 12          | 11          | 11          | 10          | 10          | 9           | 8           | 9           | 13          |
| Urology                       | 2           | 1           | 2           | 3           | 2           | 3           | 2           | 1           | 3           | 3           |
| Otolaryngology                | 142         | 149         | 159         | 157         | 164         | 157         | 152         | 178         | 196         | 188         |
| Pathology                     | 928         | 881         | 851         | 773         | 762         | 749         | 710         | 774         | 822         | 860         |
| Pediatrics                    | 769         | 803         | 777         | 764         | 715         | 715         | 679         | 720         | 734         | 791         |
| Physical Medicine & Rel       | 31          | 35          | 33          | 37          | 34          | 42          | 50          | 60          | 61          | 60          |
| Plastic Surgery               | 3           | 0           | 1           | 1           | 0           | 0           | 1           | 0           | 1           | 0           |
| Psychiatry                    | 1010        | 990         | 904         | 896         | 822         | 846         | 864         | 899         | 903         | 932         |
| Radiation-Diagnostic/On       | 529         | 516         | 526         | 495         | 503         | 499         | 526         | 607         | 604         | 619         |
| Surgery                       | 413         | 390         | 369         | 359         | 360         | 350         | 384         | 412         | 449         | 489         |
| Urology                       | 78          | 77          | 83          | 76          | 63          | 60          | 61          | 60          | 61          | 67          |

Supplementary Table 3: Number of NIH advanced career grants (R01, R03, R21, P30, U01) awarded from 2011-2020 by specialty

|                           | 2011 | 2012 | 2013 | 2014 | 2015 | 2016 | 2017 | 2018 | 2019 | 2020 |
|---------------------------|------|------|------|------|------|------|------|------|------|------|
| <b>R01</b>                |      |      |      |      |      |      |      |      |      |      |
| Anesthesiology            | 199  | 214  | 214  | 227  | 212  | 211  | 217  | 250  | 250  | 264  |
| Dermatology               | 115  | 124  | 126  | 116  | 116  | 111  | 106  | 121  | 124  | 110  |
| Emergency Medicine        | 26   | 30   | 30   | 33   | 39   | 38   | 42   | 49   | 54   | 74   |
| Family Medicine           | 77   | 85   | 76   | 68   | 77   | 71   | 70   | 75   | 89   | 99   |
| Internal Medicine/Medic   | 3250 | 3114 | 2917 | 2831 | 2804 | 2903 | 3026 | 3184 | 3317 | 3455 |
| Neurology                 | 520  | 551  | 538  | 522  | 528  | 540  | 563  | 639  | 664  | 704  |
| Neurosurgery              | 138  | 141  | 140  | 131  | 161  | 166  | 175  | 190  | 204  | 223  |
| Obstetrics and Gynecology | 145  | 133  | 139  | 131  | 132  | 154  | 177  | 171  | 207  | 231  |
| Ophthalmology             | 340  | 362  | 351  | 371  | 358  | 349  | 380  | 408  | 436  | 468  |
| Orthopedics               | 111  | 119  | 134  | 124  | 121  | 131  | 138  | 141  | 152  | 178  |
| Otolaryngology            | 142  | 149  | 159  | 157  | 164  | 157  | 152  | 178  | 196  | 188  |
| Pathology                 | 928  | 881  | 851  | 773  | 762  | 749  | 710  | 774  | 822  | 860  |
| Pediatrics                | 769  | 803  | 777  | 764  | 715  | 715  | 679  | 720  | 734  | 791  |
| Physical Medicine & Rel   | 31   | 35   | 33   | 37   | 34   | 42   | 50   | 60   | 61   | 60   |
| Plastic Surgery           | 3    | 0    | 1    | 1    | 0    | 0    | 1    | 0    | 1    | 0    |
| Psychiatry                | 1010 | 990  | 904  | 896  | 822  | 846  | 864  | 899  | 903  | 932  |
| Radiation-Diagnostic/On   | 529  | 516  | 526  | 495  | 503  | 499  | 526  | 607  | 604  | 619  |
| Surgery                   | 413  | 390  | 369  | 359  | 360  | 350  | 384  | 412  | 449  | 489  |
| Urology                   | 78   | 77   | 83   | 76   | 63   | 60   | 61   | 60   | 61   | 67   |
| <b>R03</b>                |      |      |      |      |      |      |      |      |      |      |
| Anesthesiology            | 6    | 9    | 6    | 6    | 4    | 4    | 6    | 9    | 8    | 5    |
| Dermatology               | 5    | 6    | 2    | 4    | 8    | 9    | 7    | 4    | 4    | 5    |
| Emergency Medicine        | 1    | 1    | 1    | 1    | 4    | 4    | 5    | 4    | 2    | 4    |
| Family Medicine           | 8    | 9    | 9    | 7    | 6    | 5    | 2    | 2    | 5    | 3    |
| Internal Medicine/Medic   | 118  | 139  | 132  | 124  | 110  | 90   | 91   | 102  | 120  | 121  |
| Neurology                 | 10   | 9    | 11   | 12   | 13   | 16   | 15   | 15   | 15   | 13   |
| Neurosurgery              | 3    | 8    | 8    | 5    | 7    | 4    | 2    | 2    | 2    | 6    |
| Obstetrics and Gynecology | 8    | 12   | 10   | 12   | 10   | 11   | 15   | 17   | 14   | 10   |
| Ophthalmology             | 0    | 0    | 0    | 2    | 3    | 1    | 1    | 2    | 3    | 3    |
| Orthopedics               | 10   | 10   | 12   | 14   | 10   | 7    | 3    | 3    | 7    | 7    |
| Otolaryngology            | 13   | 18   | 19   | 15   | 14   | 12   | 12   | 10   | 2    | 3    |
| Pathology                 | 25   | 23   | 21   | 20   | 15   | 9    | 12   | 21   | 26   | 25   |
| Pediatrics                | 38   | 29   | 35   | 34   | 34   | 43   | 35   | 41   | 38   | 35   |
| Physical Medicine & Rel   | 7    | 7    | 5    | 7    | 5    | 5    | 3    | 4    | 7    | 8    |
| Plastic Surgery           | 0    | 0    | 0    | 0    | 0    | 1    | 1    | 0    | 0    | 0    |
| Psychiatry                | 25   | 28   | 30   | 22   | 20   | 23   | 29   | 23   | 20   | 16   |
| Radiation-Diagnostic/On   | 8    | 7    | 10   | 17   | 21   | 9    | 11   | 18   | 22   | 22   |
| Surgery                   | 15   | 20   | 17   | 17   | 19   | 14   | 25   | 21   | 11   | 15   |
| Urology                   | 1    | 3    | 2    | 4    | 5    | 3    | 1    | 1    | 3    | 4    |
| <b>R21</b>                |      |      |      |      |      |      |      |      |      |      |
| Anesthesiology            | 27   | 24   | 27   | 21   | 28   | 27   | 26   | 37   | 39   | 33   |
| Dermatology               | 19   | 18   | 18   | 26   | 21   | 14   | 15   | 16   | 15   | 20   |
| Emergency Medicine        | 6    | 5    | 3    | 5    | 6    | 5    | 7    | 10   | 6    | 5    |
| Family Medicine           | 14   | 16   | 19   | 20   | 24   | 23   | 14   | 12   | 16   | 16   |
| Internal Medicine/Medic   | 375  | 407  | 393  | 368  | 379  | 394  | 375  | 376  | 377  | 385  |
| Neurology                 | 64   | 78   | 73   | 73   | 72   | 79   | 82   | 93   | 107  | 70   |
| Neurosurgery              | 13   | 18   | 22   | 21   | 35   | 36   | 27   | 26   | 41   | 33   |
| Obstetrics and Gynecology | 33   | 28   | 27   | 25   | 24   | 24   | 21   | 28   | 33   | 43   |
| Ophthalmology             | 21   | 19   | 30   | 29   | 36   | 34   | 24   | 31   | 51   | 52   |
| Orthopedics               | 14   | 20   | 19   | 15   | 16   | 16   | 26   | 36   | 26   | 27   |
| Otolaryngology            | 14   | 16   | 21   | 28   | 23   | 14   | 15   | 31   | 30   | 33   |
| Pathology                 | 124  | 104  | 112  | 140  | 160  | 166  | 138  | 117  | 113  | 108  |
| Pediatrics                | 104  | 95   | 102  | 108  | 121  | 123  | 116  | 118  | 127  | 132  |
| Physical Medicine & Rel   | 4    | 7    | 11   | 9    | 4    | 9    | 13   | 10   | 13   | 9    |
| Plastic Surgery           | 0    | 0    | 0    | 0    | 0    | 0    | 0    | 0    | 0    | 0    |
| Psychiatry                | 122  | 166  | 191  | 179  | 156  | 151  | 153  | 149  | 155  | 158  |

|                               |             |             |             |             |             |             |             |             |             |             |
|-------------------------------|-------------|-------------|-------------|-------------|-------------|-------------|-------------|-------------|-------------|-------------|
| Radiation-Diagnostic/On       | 97          | 101         | 102         | 115         | 121         | 118         | 115         | 89          | 103         | 101         |
| Surgery                       | 58          | 54          | 46          | 48          | 62          | 68          | 50          | 49          | 51          | 54          |
| Urology                       | 8           | 9           | 5           | 4           | 10          | 13          | 9           | 7           | 8           | 10          |
| <b>F30</b>                    | <b>2011</b> | <b>2012</b> | <b>2013</b> | <b>2014</b> | <b>2015</b> | <b>2016</b> | <b>2017</b> | <b>2018</b> | <b>2019</b> | <b>2020</b> |
| Anesthesiology                | 0           | 0           | 0           | 1           | 0           | 0           | 0           | 0           | 0           | 0           |
| Dermatology                   | 11          | 8           | 8           | 11          | 8           | 12          | 11          | 5           | 4           | 4           |
| Emergency Medicine            | 0           | 0           | 0           | 0           | 0           | 0           | 0           | 0           | 0           | 0           |
| Family Medicine               | 0           | 4           | 4           | 4           | 4           | 4           | 1           | 1           | 4           | 4           |
| Internal Medicine/Medicine    | 248         | 217         | 206         | 248         | 312         | 353         | 283         | 558         | 333         | 364         |
| Neurology                     | 15          | 19          | 16          | 14          | 14          | 16          | 16          | 18          | 21          | 32          |
| Neurosurgery                  | 3           | 3           | 3           | 2           | 2           | 1           | 1           | 1           | 2           | 0           |
| Obstetrics and Gynecology     | 3           | 3           | 2           | 3           | 5           | 6           | 0           | 3           | 6           | 10          |
| Ophthalmology                 | 31          | 37          | 30          | 29          | 32          | 29          | 29          | 31          | 29          | 26          |
| Orthopedics                   | 4           | 4           | 4           | 5           | 5           | 5           | 5           | 5           | 6           | 6           |
| Otolaryngology                | 15          | 8           | 7           | 8           | 6           | 5           | 1           | 61          | 1           | 6           |
| Pathology                     | 17          | 18          | 20          | 23          | 26          | 27          | 27          | 20          | 13          | 15          |
| Pediatrics                    | 17          | 21          | 23          | 18          | 18          | 20          | 18          | 12          | 14          | 25          |
| Physical Medicine & Rehab     | 0           | 0           | 0           | 0           | 0           | 0           | 0           | 0           | 0           | 0           |
| Plastic Surgery               | 0           | 0           | 0           | 0           | 0           | 0           | 0           | 0           | 0           | 0           |
| Psychiatry                    | 13          | 15          | 17          | 15          | 20          | 13          | 11          | 9           | 11          | 9           |
| Radiation-Diagnostic/Oncology | 5           | 6           | 5           | 7           | 8           | 7           | 10          | 10          | 12          | 11          |
| Surgery                       | 13          | 11          | 15          | 12          | 24          | 27          | 20          | 127         | 22          | 29          |
| Urology                       | 7           | 6           | 5           | 6           | 6           | 9           | 0           | 0           | 0           | 0           |
| <b>U01</b>                    | <b>2011</b> | <b>2012</b> | <b>2013</b> | <b>2014</b> | <b>2015</b> | <b>2016</b> | <b>2017</b> | <b>2018</b> | <b>2019</b> | <b>2020</b> |
| Anesthesiology                | 7           | 7           | 7           | 12          | 9           | 15          | 14          | 15          | 12          | 13          |
| Dermatology                   | 3           | 5           | 7           | 6           | 8           | 5           | 5           | 6           | 9           | 11          |
| Emergency Medicine            | 10          | 13          | 17          | 14          | 8           | 5           | 4           | 8           | 3           | 7           |
| Family Medicine               | 11          | 14          | 12          | 11          | 15          | 15          | 13          | 15          | 15          | 10          |
| Internal Medicine/Medicine    | 386         | 399         | 432         | 381         | 417         | 414         | 439         | 491         | 564         | 589         |
| Neurology                     | 33          | 40          | 40          | 54          | 56          | 78          | 62          | 70          | 68          | 76          |
| Neurosurgery                  | 6           | 4           | 8           | 7           | 13          | 27          | 25          | 21          | 10          | 8           |
| Obstetrics and Gynecology     | 15          | 17          | 8           | 13          | 23          | 13          | 16          | 12          | 9           | 11          |
| Ophthalmology                 | 4           | 7           | 5           | 5           | 5           | 5           | 6           | 10          | 12          | 8           |
| Orthopedics                   | 0           | 0           | 1           | 2           | 1           | 1           | 0           | 0           | 1           | 1           |
| Otolaryngology                | 4           | 4           | 3           | 4           | 3           | 3           | 4           | 5           | 4           | 4           |
| Pathology                     | 54          | 54          | 46          | 33          | 29          | 32          | 32          | 35          | 38          | 37          |
| Pediatrics                    | 130         | 128         | 116         | 120         | 124         | 103         | 109         | 110         | 111         | 110         |
| Physical Medicine & Rehab     | 4           | 3           | 7           | 7           | 8           | 5           | 5           | 6           | 3           | 3           |
| Plastic Surgery               | 0           | 0           | 0           | 0           | 0           | 0           | 0           | 1           | 1           | 1           |
| Psychiatry                    | 53          | 87          | 79          | 85          | 104         | 83          | 75          | 88          | 92          | 79          |
| Radiation-Diagnostic/Oncology | 14          | 18          | 22          | 26          | 34          | 29          | 40          | 54          | 56          | 49          |
| Surgery                       | 51          | 53          | 57          | 47          | 51          | 47          | 52          | 63          | 57          | 58          |
| Urology                       | 14          | 15          | 17          | 20          | 17          | 16          | 19          | 13          | 15          | 14          |

Supplementary Table 4: Number of active physicians per awarded NIH training grant (F32, T32) from 2011-2020 by specialty

|                               |             |             |             |             |             |             |             |             |             |             |
|-------------------------------|-------------|-------------|-------------|-------------|-------------|-------------|-------------|-------------|-------------|-------------|
| <b>F32</b>                    | <b>2011</b> | <b>2012</b> | <b>2013</b> | <b>2014</b> | <b>2015</b> | <b>2016</b> | <b>2017</b> | <b>2018</b> | <b>2019</b> | <b>2020</b> |
| Anesthesiology                | 1004        | 6740        | 5095        | 5865        | 41351       | 41557       | 1393        | 8403        | 21134       | 7045        |
| Dermatology                   | 2705        | 2773        | 3788        | 5767        | 3902        | 3960        | 2410        | 3071        | 12516       | 4172        |
| Emergency Medicine            | 33984       | 35613       | 37241       | -           | -           | -           | -           | -           | -           | 45202       |
| Family Medicine               | -           | -           | -           | 110106      | 111295      | -           | -           | -           | -           | -           |
| Internal Medicine/Medicine    | 865         | 983         | 957         | 1042        | 1047        | 965         | 875         | 1025        | 1113        | 1036        |
| Neurology                     | 861         | 1304        | 658         | 428         | 462         | 589         | 473         | 516         | 488         | 643         |
| Neurosurgery                  | 631         | 639         | 646         | 657         | 535         | 544         | 615         | 376         | 719         | 479         |
| Obstetrics and Gynecology     | 10094       | 6767        | 10207       | 10288       | 8296        | 10392       | 13885       | 7031        | 8544        | 8544        |
| Ophthalmology                 | 4486        | 2590        | 2617        | 2051        | 1549        | 2338        | 1882        | 2724        | 2146        | 1931        |
| Orthopedics                   | 3964        | 3266        | 3875        | 3852        | 3191        | 3179        | 3167        | 2719        | 2724        | 2724        |
| Otolaryngology                | 923         | 1325        | 1331        | 937         | 1569        | 1184        | 680         | 965         | 1222        | 1630        |
| Pathology                     | 681         | 844         | 623         | 614         | 578         | 523         | 535         | 749         | 790         | 973         |
| Pediatrics                    | 2220        | 2070        | 2344        | 2371        | 3197        | 3411        | 3896        | 4579        | 3190        | 5052        |
| Physical Medicine & Rehab     | 8503        | 8705        | -           | 9035        | 9164        | 9254        | 3114        | 2389        | 3256        | 4884        |
| Plastic Surgery               | -           | -           | -           | -           | -           | -           | -           | -           | 7317        | -           |
| Psychiatry                    | 982         | 1303        | 1332        | 1443        | 1398        | 1309        | 1317        | 1540        | 1338        | 1212        |
| Radiation-Diagnostic/Oncology | 2318        | 4387        | 7550        | 38191       | 19316       | 4360        | 4981        | 5796        | 10324       | 5900        |
| Surgery                       | 1548        | 1717        | 1937        | 1327        | 1203        | 1257        | 1473        | 1265        | 1704        | 1704        |
| Urology                       | 4913        | 4899        | 4886        | 1958        | 4904        | 3288        | 3307        | 10061       | 10201       | 10201       |
| <b>T32</b>                    | <b>2011</b> | <b>2012</b> | <b>2013</b> | <b>2014</b> | <b>2015</b> | <b>2016</b> | <b>2017</b> | <b>2018</b> | <b>2019</b> | <b>2020</b> |
| Anesthesiology                | 3086        | 2696        | 2911        | 2415        | 1969        | 2187        | 1670        | 2211        | 2113        | 2818        |
| Dermatology                   | 902         | 924         | 947         | 1049        | 1064        | 1080        | 1096        | 1228        | 1788        | 1565        |
| Emergency Medicine            | -           | -           | -           | -           | -           | 40964       | 21174       | 21888       | 22601       | 22601       |
| Family Medicine               | 21310       | 26933       | 18153       | 22021       | 27824       | 28101       | 12613       | 23171       | 29550       | 23640       |
| Internal Medicine/Medicine    | 285         | 283         | 311         | 319         | 337         | 337         | 256         | 322         | 346         | 329         |
| Neurology                     | 349         | 383         | 411         | 415         | 462         | 452         | 361         | 387         | 404         | 382         |
| Neurosurgery                  | 1682        | 1703        | 1724        | 1753        | 1069        | 1088        | 922         | 1410        | 958         | 719         |
| Obstetrics and Gynecology     | 3365        | 3691        | 3402        | 3741        | 3457        | 4157        | 3204        | 6027        | 5340        | 3884        |
| Ophthalmology                 | 1196        | 1133        | 872         | 971         | 1094        | 1039        | 697         | 867         | 743         | 840         |
| Orthopedics                   | 2478        | 2178        | 2422        | 2751        | 2735        | 2725        | 2375        | 2719        | 2724        | 2384        |
| Otolaryngology                | 769         | 773         | 847         | 669         | 627         | 631         | 328         | 568         | 611         | 611         |
| Pathology                     | 174         | 191         | 196         | 171         | 195         | 187         | 144         | 190         | 214         | 230         |
| Pediatrics                    | 514         | 565         | 625         | 654         | 639         | 690         | 664         | 815         | 819         | 842         |
| Physical Medicine & Rehab     | 945         | 2176        | 2227        | 3012        | 3055        | 2313        | 1869        | 1911        | 2442        | 1953        |



|                               |      |      |      |      |      |      |      |      |      |      |
|-------------------------------|------|------|------|------|------|------|------|------|------|------|
| Plastic Surgery               | -    | -    | -    | -    | -    | -    | -    | -    | -    | -    |
| Psychiatry                    | 497  | 478  | 466  | 475  | 531  | 535  | 357  | 558  | 570  | 546  |
| Radiation-Diagnostic/Oncology | 1475 | 1755 | 1716 | 1469 | 1380 | 1453 | 1207 | 1268 | 1377 | 1588 |
| Surgery                       | 487  | 460  | 466  | 525  | 526  | 513  | 439  | 477  | 441  | 465  |
| Urology                       | 1404 | 1225 | 1396 | 1224 | 1962 | 1644 | 2480 | 5031 | 2550 | 2550 |

Supplementary Table 5: Number of active physicians per awarded NIH career development grant (K01, K08, K23) from 2011-2020 by specialty

|                               | 2011  | 2012  | 2013  | 2014  | 2015   | 2016   | 2017   | 2018   | 2019  | 2020  |
|-------------------------------|-------|-------|-------|-------|--------|--------|--------|--------|-------|-------|
| <b>K01</b>                    |       |       |       |       |        |        |        |        |       |       |
| Anesthesiology                | 10031 | 10110 | 10190 | 8211  | 8270   | 8311   | 6960   | 5252   | 8453  | 6038  |
| Dermatology                   | 2705  | 2773  | 1894  | 2884  | 1951   | 1697   | 1096   | 945    | 1252  | 1565  |
| Emergency Medicine            | -     | 35613 | 37241 | 38410 | 19790  | -      | -      | 43775  | 45202 | 22601 |
| Family Medicine               | 9686  | 8287  | 10892 | 15729 | 15899  | 14051  | 14189  | 12873  | 13133 | 7880  |
| Internal Medicine/Medicine    | 839   | 880   | 881   | 782   | 718    | 803    | 856    | 765    | 707   | 683   |
| Neurology                     | 1076  | 1003  | 822   | 781   | 788    | 713    | 686    | 733    | 615   | 745   |
| Neurosurgery                  | 1682  | 1703  | 5171  | -     | -      | 5439   | -      | 2820   | 1916  | 1916  |
| Obstetrics and Gynecology     | 20189 | 40602 | 20413 | 10288 | 8296   | 8314   | 5951   | 7031   | 5340  | 5340  |
| Ophthalmology                 | -     | -     | -     | 18455 | -      | -      | 18817  | 9532   | 9656  | 19312 |
| Orthopedics                   | 3964  | 4900  | 2768  | 2751  | 1915   | 2725   | 3167   | 3807   | 3178  | 3814  |
| Otolaryngology                | 4616  | 4638  | 4660  | 4683  | -      | -      | -      | -      | -     | 9777  |
| Pathology                     | 1152  | 1024  | 914   | 964   | 1022   | 1089   | 988    | 796    | 744   | 602   |
| Pediatrics                    | 2775  | 3493  | 3126  | 2995  | 3596   | 2320   | 2541   | 2835   | 2636  | 2245  |
| Physical Medicine & Rehab     | 2834  | 2176  | 2227  | 1506  | 1309   | 1157   | 719    | 735    | 977   | 814   |
| Plastic Surgery               | -     | -     | -     | -     | -      | -      | -      | -      | -     | -     |
| Psychiatry                    | 473   | 450   | 491   | 500   | 524    | 567    | 546    | 592    | 539   | 479   |
| Radiation-Diagnostic/Oncology | 1909  | 2340  | 2904  | 3472  | 2759   | 2803   | 2097   | 2254   | 2753  | 3754  |
| Surgery                       | 3289  | 3679  | 2290  | 3603  | 2525   | 2096   | 1926   | 2811   | 3196  | 3652  |
| Urology                       | 9826  | 9799  | 9771  | 9790  | 3269   | 2466   | 1654   | 2012   | 2040  | 1700  |
| <b>K08</b>                    |       |       |       |       |        |        |        |        |       |       |
| Anesthesiology                | 3344  | 2889  | 2717  | 2737  | 3446   | 2770   | 2784   | 1827   | 1691  | 2113  |
| Dermatology                   | 637   | 504   | 758   | 769   | 732    | 914    | 927    | 945    | 1043  | 1252  |
| Emergency Medicine            | 11328 | 8903  | 6207  | 9603  | 7916   | 5852   | 4705   | 5472   | 7534  | 7534  |
| Family Medicine               | 21310 | 21547 | 21783 | 55053 | 111295 | 112405 | 113514 | 115856 | 39399 | 39399 |
| Internal Medicine/Medicine    | 405   | 409   | 461   | 467   | 496    | 471    | 490    | 481    | 437   | 452   |
| Neurology                     | 340   | 352   | 337   | 415   | 352    | 411    | 416    | 464    | 393   | 393   |
| Neurosurgery                  | 721   | 730   | 646   | 657   | 486    | 418    | 395    | 513    | 479   | 575   |
| Obstetrics and Gynecology     | 5768  | 4511  | 5832  | 8231  | 20741  | 13856  | 20828  | 7031   | 6103  | 6103  |
| Ophthalmology                 | 718   | 755   | 654   | 595   | 563    | 693    | 752    | 706    | 840   | 805   |
| Orthopedics                   | 19822 | 6533  | 4844  | 4815  | 4786   | 4768   | 2714   | 2379   | 2724  | 3178  |
| Otolaryngology                | 769   | 714   | 717   | 851   | 724    | 861    | 1058   | 877    | 1086  | 978   |
| Pathology                     | 428   | 410   | 416   | 375   | 403    | 568    | 514    | 439    | 452   | 506   |
| Pediatrics                    | 509   | 565   | 592   | 677   | 710    | 630    | 513    | 518    | 532   | 606   |
| Physical Medicine & Rehab     | -     | 4352  | -     | -     | -      | -      | -      | 9555   | 9767  | 9767  |
| Plastic Surgery               | -     | -     | -     | -     | -      | -      | -      | -      | -     | -     |
| Psychiatry                    | 1160  | 1219  | 1963  | 1501  | 1509   | 1726   | 1661   | 1674   | 1940  | 1616  |
| Radiation-Diagnostic/Oncology | 6489  | 7020  | 7550  | 5456  | 12877  | 19620  | 13282  | 10143  | 2950  | 2429  |
| Surgery                       | 454   | 444   | 494   | 587   | 683    | 613    | 626    | 588    | 568   | 568   |
| Urology                       | 1092  | 1225  | 888   | 1632  | 2452   | 1973   | 1984   | 2515   | 1700  | 2040  |
| <b>K23</b>                    |       |       |       |       |        |        |        |        |       |       |
| Anesthesiology                | 4458  | 4044  | 3135  | 3158  | 3446   | 4156   | 3212   | 3501   | 2486  | 2486  |
| Dermatology                   | 3607  | 2773  | 3788  | 11535 | 3902   | 2970   | 3013   | 1365   | 1252  | 1565  |
| Emergency Medicine            | 1888  | 2374  | 2483  | 2744  | 2639   | 2156   | 2017   | 2304   | 2260  | 3013  |
| Family Medicine               | 11839 | 13467 | 18153 | 36702 | 18549  | 28101  | 22703  | 23171  | 19700 | 16885 |
| Internal Medicine/Medicine    | 356   | 349   | 363   | 379   | 413    | 438    | 468    | 477    | 483   | 420   |
| Neurology                     | 212   | 221   | 274   | 265   | 258    | 315    | 286    | 263    | 244   | 248   |
| Neurosurgery                  | 2524  | 1277  | 1034  | 1315  | 1069   | 1088   | 1383   | 1410   | 1150  | 958   |
| Obstetrics and Gynecology     | 3365  | 2900  | 3711  | 2940  | 4148   | 8314   | 5951   | 5274   | 4272  | 3560  |
| Ophthalmology                 | 1196  | 1648  | 1409  | 1678  | 1430   | 935    | 896    | 908    | 920   | 966   |
| Orthopedics                   | 9911  | 6533  | 6458  | 6420  | 9573   | 9537   | 19001  | 6345   | 6356  | 4767  |
| Otolaryngology                | 1154  | 1546  | 1553  | 1041  | 784    | 861    | 794    | 804    | 815   | 815   |
| Pathology                     | 3744  | 4781  | 6855  | 4499  | 6643   | 13063  | 12839  | 12741  | 12643 | 4214  |
| Pediatrics                    | 591   | 601   | 632   | 639   | 728    | 892    | 687    | 640    | 561   | 470   |
| Physical Medicine & Rehab     | 1215  | 1451  | 891   | 753   | 1018   | 925    | 1557   | 4778   | 3256  | 3256  |
| Plastic Surgery               | -     | -     | -     | -     | -      | -      | -      | -      | -     | -     |
| Psychiatry                    | 322   | 323   | 359   | 379   | 377    | 408    | 375    | 374    | 353   | 343   |
| Radiation-Diagnostic/Oncology | 5408  | 8774  | 9438  | 9548  | 9658   | 9810   | 9962   | 20286  | 41297 | 13766 |
| Surgery                       | 2024  | 2146  | 2290  | 2293  | 2525   | 2515   | 2782   | 3163   | 2840  | 1966  |
| Urology                       | 4913  | 9799  | 4886  | 3263  | 4904   | 3288   | 4961   | 10061  | 3400  | 3400  |

Supplementary Table 6: Number of active physicians per awarded NIH advanced career grant (R01, R03, R21, P30, U01) from 2011-2020 by specialty

|                            | 2011 | 2012 | 2013 | 2014 | 2015 | 2016 | 2017 | 2018 | 2019 | 2020 |
|----------------------------|------|------|------|------|------|------|------|------|------|------|
| <b>R01</b>                 |      |      |      |      |      |      |      |      |      |      |
| Anesthesiology             | 202  | 189  | 190  | 181  | 195  | 197  | 192  | 168  | 169  | 160  |
| Dermatology                | 94   | 89   | 90   | 99   | 101  | 107  | 114  | 102  | 101  | 114  |
| Emergency Medicine         | 1307 | 1187 | 1241 | 1164 | 1015 | 1078 | 1008 | 893  | 837  | 611  |
| Family Medicine            | 1384 | 1267 | 1433 | 1619 | 1445 | 1583 | 1622 | 1545 | 1328 | 1194 |
| Internal Medicine/Medicine | 34   | 35   | 38   | 40   | 41   | 40   | 38   | 37   | 36   | 35   |
| Neurology                  | 25   | 24   | 24   | 25   | 25   | 25   | 24   | 22   | 21   | 20   |
| Neurosurgery               | 37   | 36   | 37   | 40   | 33   | 33   | 32   | 30   | 28   | 26   |
| Obstetrics and Gynecology  | 278  | 305  | 294  | 314  | 314  | 270  | 235  | 247  | 206  | 185  |
| Ophthalmology              | 53   | 50   | 52   | 50   | 52   | 54   | 50   | 47   | 44   | 41   |
| Orthopedics                | 179  | 165  | 145  | 155  | 158  | 146  | 138  | 135  | 125  | 107  |
| Otolaryngology             | 65   | 62   | 59   | 60   | 57   | 60   | 63   | 54   | 50   | 52   |
| Pathology                  | 16   | 16   | 16   | 17   | 17   | 17   | 18   | 16   | 15   | 15   |

|    |                               |             |             |             |             |             |             |             |             |             |             |
|----|-------------------------------|-------------|-------------|-------------|-------------|-------------|-------------|-------------|-------------|-------------|-------------|
| 1  |                               |             |             |             |             |             |             |             |             |             |             |
| 2  | Pediatrics                    | 72          | 70          | 72          | 74          | 80          | 81          | 86          | 83          | 83          | 77          |
| 3  | Physical Medicine & Rehab     | 274         | 249         | 270         | 244         | 270         | 220         | 187         | 159         | 160         | 163         |
| 4  | Plastic Surgery               | 2274        | -           | 6942        | 6981        | -           | -           | 7142        | -           | 7317        | -           |
| 5  | Psychiatry                    | 38          | 38          | 41          | 42          | 46          | 45          | 44          | 43          | 43          | 42          |
| 6  | Radiation-Diagnostic/Oncology | 61          | 68          | 72          | 77          | 77          | 79          | 76          | 67          | 68          | 67          |
| 7  | Surgery                       | 64          | 66          | 68          | 70          | 70          | 72          | 65          | 61          | 57          | 52          |
| 8  | Urology                       | 126         | 127         | 118         | 129         | 156         | 164         | 163         | 168         | 167         | 152         |
| 9  |                               |             |             |             |             |             |             |             |             |             |             |
| 10 | <b>R03</b>                    | <b>2011</b> | <b>2012</b> | <b>2013</b> | <b>2014</b> | <b>2015</b> | <b>2016</b> | <b>2017</b> | <b>2018</b> | <b>2019</b> | <b>2020</b> |
| 11 | Anesthesiology                | 6687        | 4493        | 6793        | 6842        | 10338       | 10389       | 6960        | 4668        | 5283        | 8453        |
| 12 | Dermatology                   | 2164        | 1849        | 5682        | 2884        | 1463        | 1320        | 1722        | 3071        | 3129        | 2503        |
| 13 | Emergency Medicine            | 33984       | 35613       | 37241       | 38410       | 9895        | 10241       | 8470        | 10944       | 22601       | 11301       |
| 14 | Family Medicine               | 13319       | 11970       | 12102       | 15729       | 18549       | 22481       | 56757       | 57928       | 23640       | 39399       |
| 15 | Internal Medicine/Medicine    | 924         | 792         | 841         | 908         | 1037        | 1276        | 1270        | 1156        | 1001        | 993         |
| 16 | Neurology                     | 1292        | 1448        | 1196        | 1106        | 1030        | 847         | 914         | 929         | 944         | 1088        |
| 17 | Neurosurgery                  | 1682        | 639         | 646         | 1052        | 764         | 1360        | 2766        | 2820        | 2874        | 958         |
| 18 | Obstetrics and Gynecology     | 5047        | 3383        | 4083        | 3429        | 4148        | 3779        | 2777        | 2482        | 3051        | 4272        |
| 19 | Ophthalmology                 | -           | -           | -           | 9228        | 6198        | 18705       | 18817       | 9532        | 6437        | 6437        |
| 20 | Orthopedics                   | 1982        | 1960        | 1615        | 1376        | 1915        | 2725        | 6334        | 6345        | 2724        | 2724        |
| 21 | Otolaryngology                | 710         | 515         | 491         | 624         | 672         | 789         | 794         | 965         | 4889        | 3259        |
| 22 | Pathology                     | 599         | 624         | 653         | 675         | 886         | 1451        | 1070        | 607         | 486         | 506         |
| 23 | Pediatrics                    | 1461        | 1928        | 1607        | 1674        | 1692        | 1349        | 1670        | 1452        | 1595        | 1732        |
| 24 | Physical Medicine & Rehab     | 1215        | 1244        | 1781        | 1291        | 1833        | 1851        | 3114        | 2389        | 1395        | 1221        |
| 25 | Plastic Surgery               | -           | -           | -           | -           | -           | 7081        | 7142        | -           | -           | -           |
| 26 | Psychiatry                    | 1531        | 1350        | 1243        | 1705        | 1887        | 1651        | 1317        | 1674        | 1940        | 2425        |
| 27 | Radiation-Diagnostic/Oncology | 4056        | 5014        | 3775        | 2247        | 1840        | 4360        | 3622        | 2254        | 1877        | 1877        |
| 28 | Surgery                       | 1754        | 1288        | 1482        | 1484        | 1329        | 1796        | 1002        | 1205        | 2324        | 1704        |
| 29 | Urology                       | 9826        | 3266        | 4886        | 2447        | 1962        | 3288        | 9921        | 10061       | 3400        | 2550        |
| 30 |                               |             |             |             |             |             |             |             |             |             |             |
| 31 | <b>R21</b>                    | <b>2011</b> | <b>2012</b> | <b>2013</b> | <b>2014</b> | <b>2015</b> | <b>2016</b> | <b>2017</b> | <b>2018</b> | <b>2019</b> | <b>2020</b> |
| 32 | Anesthesiology                | 1486        | 1685        | 1510        | 1955        | 1477        | 1539        | 1606        | 1136        | 1084        | 1281        |
| 33 | Dermatology                   | 569         | 616         | 631         | 444         | 557         | 848         | 803         | 768         | 834         | 626         |
| 34 | Emergency Medicine            | 5664        | 7123        | 12414       | 7682        | 6597        | 8193        | 6050        | 4378        | 7534        | 9040        |
| 35 | Family Medicine               | 7611        | 6733        | 5732        | 5505        | 4637        | 4887        | 8108        | 9655        | 7387        | 7387        |
| 36 | Internal Medicine/Medicine    | 291         | 270         | 283         | 306         | 301         | 291         | 308         | 313         | 319         | 312         |
| 37 | Neurology                     | 202         | 167         | 180         | 182         | 186         | 172         | 167         | 150         | 132         | 202         |
| 38 | Neurosurgery                  | 388         | 284         | 235         | 250         | 153         | 151         | 205         | 217         | 140         | 174         |
| 39 | Obstetrics and Gynecology     | 1224        | 1450        | 1512        | 1646        | 1728        | 1732        | 1984        | 1507        | 1295        | 993         |
| 40 | Ophthalmology                 | 854         | 954         | 611         | 636         | 516         | 550         | 784         | 615         | 379         | 371         |
| 41 | Orthopedics                   | 1416        | 980         | 1020        | 1284        | 1197        | 1192        | 731         | 529         | 733         | 706         |
| 42 | Otolaryngology                | 659         | 580         | 444         | 334         | 409         | 676         | 635         | 311         | 326         | 296         |
| 43 | Pathology                     | 121         | 138         | 122         | 96          | 83          | 79          | 93          | 109         | 112         | 112         |
| 44 | Pediatrics                    | 534         | 588         | 552         | 527         | 476         | 471         | 504         | 504         | 477         | 459         |
| 45 | Physical Medicine & Rehab     | 2126        | 1244        | 810         | 1004        | 2291        | 1028        | 719         | 956         | 751         | 1085        |
| 46 | Plastic Surgery               | -           | -           | -           | -           | -           | -           | -           | -           | -           | -           |
| 47 | Psychiatry                    | 314         | 228         | 195         | 210         | 242         | 251         | 250         | 258         | 250         | 246         |
| 48 | Radiation-Diagnostic/Oncology | 334         | 348         | 370         | 332         | 319         | 333         | 346         | 456         | 401         | 409         |
| 49 | Surgery                       | 454         | 477         | 548         | 525         | 407         | 370         | 501         | 516         | 501         | 473         |
| 50 | Urology                       | 1228        | 1089        | 1954        | 2447        | 981         | 759         | 1102        | 1437        | 1275        | 1020        |
| 51 |                               |             |             |             |             |             |             |             |             |             |             |
| 52 | <b>P30</b>                    | <b>2011</b> | <b>2012</b> | <b>2013</b> | <b>2014</b> | <b>2015</b> | <b>2016</b> | <b>2017</b> | <b>2018</b> | <b>2019</b> | <b>2020</b> |
| 53 | Anesthesiology                | -           | -           | -           | 41055       | -           | -           | -           | -           | -           | -           |
| 54 | Dermatology                   | 984         | 1386        | 1420        | 1049        | 1463        | 990         | 1096        | 2457        | 3129        | 3129        |
| 55 | Emergency Medicine            | -           | -           | -           | -           | -           | -           | -           | -           | -           | -           |
| 56 | Family Medicine               | -           | 26933       | 27229       | 27527       | 27824       | 28101       | 11351       | 11585       | 29550       | 29550       |
| 57 | Internal Medicine/Medicine    | 440         | 507         | 539         | 454         | 366         | 325         | 408         | 211         | 361         | 330         |
| 58 | Neurology                     | 861         | 686         | 822         | 948         | 957         | 847         | 857         | 774         | 674         | 442         |
| 59 | Neurosurgery                  | 1682        | 1703        | 1724        | 2629        | 2673        | 5439        | 5531        | 5640        | 2874        | -           |
| 60 | Obstetrics and Gynecology     | 1345        | 13534       | 2041        | 13718       | 8296        | 6928        | -           | 14063       | 7120        | 4272        |
| 61 | Ophthalmology                 | 579         | 490         | 611         | 636         | 581         | 645         | 649         | 615         | 666         | 743         |
| 62 | Orthopedics                   | 4956        | 4900        | 4844        | 3852        | 3829        | 3815        | 3800        | 3807        | 3178        | 3178        |
| 63 | Otolaryngology                | 615         | 1160        | 1331        | 1171        | 1569        | 1894        | 9526        | 158         | 9777        | 1630        |
| 64 | Pathology                     | 881         | 797         | 686         | 587         | 511         | 484         | 476         | 637         | 973         | 843         |
| 65 | Pediatrics                    | 3265        | 2661        | 2446        | 3161        | 3197        | 2899        | 3246        | 4961        | 4330        | 2425        |
| 66 | Physical Medicine & Rehab     | -           | -           | -           | -           | -           | -           | -           | -           | -           | -           |
| 67 | Plastic Surgery               | -           | -           | -           | -           | -           | -           | -           | -           | -           | -           |
| 68 | Psychiatry                    | 2945        | 2520        | 2194        | 2501        | 1887        | 2921        | 3473        | 4278        | 3527        | 4310        |
| 69 | Radiation-Diagnostic/Oncology | 6489        | 5850        | 7550        | 5456        | 4829        | 5606        | 3985        | 4057        | 3441        | 3754        |
| 70 | Surgery                       | 2024        | 2341        | 1679        | 2102        | 1052        | 931         | 1252        | 199         | 1162        | 882         |
| 71 | Urology                       | 1404        | 1633        | 1954        | 1632        | 1635        | 1096        | -           | -           | -           | -           |
| 72 |                               |             |             |             |             |             |             |             |             |             |             |
| 73 |                               |             |             |             |             |             |             |             |             |             |             |
| 74 | <b>U01</b>                    | <b>2011</b> | <b>2012</b> | <b>2013</b> | <b>2014</b> | <b>2015</b> | <b>2016</b> | <b>2017</b> | <b>2018</b> | <b>2019</b> | <b>2020</b> |
| 75 | Anesthesiology                | 5732        | 5777        | 5823        | 3421        | 4595        | 2770        | 2983        | 2801        | 3522        | 3251        |
| 76 | Dermatology                   | 3607        | 2218        | 1623        | 1922        | 1463        | 2376        | 2410        | 2047        | 1391        | 1138        |
| 77 | Emergency Medicine            | 3398        | 2739        | 2191        | 2744        | 4947        | 8193        | 10587       | 5472        | 15067       | 6457        |
| 78 | Family Medicine               | 9686        | 7695        | 9076        | 10010       | 7420        | 7494        | 8732        | 7724        | 7880        | 11820       |
| 79 | Internal Medicine/Medicine    | 283         | 276         | 257         | 295         | 274         | 277         | 263         | 240         | 213         | 204         |
| 80 | Neurology                     | 391         | 326         | 329         | 246         | 239         | 174         | 221         | 199         | 208         | 186         |
| 81 | Neurosurgery                  | 841         | 1277        | 646         | 751         | 411         | 201         | 221         | 269         | 575         | 719         |
| 82 | Obstetrics and Gynecology     | 2692        | 2388        | 5103        | 3166        | 1804        | 3198        | 2604        | 3516        | 4747        | 3884        |
| 83 | Ophthalmology                 | 4486        | 2590        | 3663        | 3691        | 3719        | 3741        | 3136        | 1906        | 1609        | 2414        |
| 84 | Orthopedics                   | -           | -           | 19374       | 9629        | 19145       | 19073       | -           | -           | 19069       | 19069       |
| 85 | Otolaryngology                | 2308        | 2319        | 3107        | 2341        | 3137        | 3156        | 2382        | 1930        | 2444        | 2444        |
| 86 | Pathology                     | 277         | 266         | 298         | 409         | 458         | 408         | 401         | 364         | 333         | 342         |
| 87 | Pediatrics                    | 427         | 437         | 485         | 474         | 464         | 563         | 536         | 541         | 546         | 551         |

|                               |      |      |      |      |      |      |      |      |      |      |
|-------------------------------|------|------|------|------|------|------|------|------|------|------|
| Physical Medicine & Rehab     | 2126 | 2902 | 1272 | 1291 | 1146 | 1851 | 1869 | 1593 | 3256 | 3256 |
| Plastic Surgery               |      |      |      |      |      |      |      | 7230 | 7317 | 7317 |
| Psychiatry                    | 722  | 434  | 472  | 441  | 363  | 457  | 509  | 437  | 422  | 491  |
| Radiation-Diagnostic/Oncology | 2318 | 1950 | 1716 | 1469 | 1136 | 1353 | 996  | 751  | 737  | 843  |
| Surgery                       | 516  | 486  | 442  | 537  | 495  | 535  | 482  | 402  | 448  | 441  |
| Urology                       | 702  | 653  | 575  | 489  | 577  | 617  | 522  | 774  | 680  | 729  |

Supplementary Table 7: Total NIH training grant (F32, T32) funding in thousands of dollars from 2011-2020 by specialty

| F32                           | 2011   | 2012   | 2013   | 2014   | 2015   | 2016   | 2017   | 2018   | 2019   | 2020   |
|-------------------------------|--------|--------|--------|--------|--------|--------|--------|--------|--------|--------|
| Anesthesiology                | 192    | 309    | 397    | 305    | 24     | 58     | 171    | 288    | 122    | 390    |
| Dermatology                   | 173    | 223    | 156    | 86     | 149    | 167    | 231    | 233    | 66     | 198    |
| Emergency Medicine            | 59     | 54     | 62     | 0      | 0      | 0      | 0      | 0      | 0      | 65     |
| Family Medicine               | 0      | 0      | 0      | 56     | 20     | 0      | 0      | 0      | 0      | 0      |
| Internal Medicine/Medicine    | 6543   | 5803   | 5850   | 5543   | 5833   | 6417   | 6236   | 6436   | 6670   | 7700   |
| Neurology                     | 732    | 449    | 964    | 1539   | 1457   | 1296   | 1234   | 1520   | 1584   | 1393   |
| Neurosurgery                  | 421    | 365    | 338    | 413    | 503    | 538    | 529    | 802    | 443    | 726    |
| Obstetrics and Gynecology     | 209    | 290    | 175    | 215    | 276    | 229    | 146    | 356    | 310    | 304    |
| Ophthalmology                 | 180    | 351    | 385    | 491    | 644    | 398    | 430    | 420    | 532    | 567    |
| Orthopedics                   | 247    | 288    | 252    | 231    | 321    | 288    | 331    | 429    | 446    | 471    |
| Otolaryngology                | 527    | 384    | 355    | 508    | 297    | 463    | 595    | 542    | 500    | 434    |
| Pathology                     | 1141   | 865    | 955    | 1023   | 1207   | 1368   | 892    | 1052   | 980    | 726    |
| Pediatrics                    | 1339   | 1416   | 1246   | 1229   | 867    | 773    | 737    | 762    | 1158   | 667    |
| Physical Medicine & Rehab     | 51     | 52     | 0      | 56     | 41     | 69     | 188    | 246    | 197    | 137    |
| Plastic Surgery               | 0      | 0      | 0      | 0      | 0      | 0      | 0      | 0      | 71     | 0      |
| Psychiatry                    | 1921   | 1391   | 1318   | 1254   | 1424   | 1560   | 1178   | 1385   | 1700   | 2021   |
| Radiation-Diagnostic/Oncology | 708    | 400    | 185    | 55     | 112    | 478    | 383    | 429    | 269    | 456    |
| Surgery                       | 831    | 760    | 662    | 983    | 1149   | 1027   | 942    | 1285   | 1008   | 1091   |
| Urology                       | 116    | 106    | 111    | 223    | 121    | 156    | 118    | 74     | 66     | 80     |
| T32                           | 2011   | 2012   | 2013   | 2014   | 2015   | 2016   | 2017   | 2018   | 2019   | 2020   |
| Anesthesiology                | 2305   | 2641   | 2729   | 3258   | 4813   | 4967   | 5373   | 5038   | 5083   | 4496   |
| Dermatology                   | 2246   | 2446   | 2263   | 1840   | 2359   | 2357   | 2268   | 2180   | 1957   | 2035   |
| Emergency Medicine            | 0      | 0      | 0      | 0      | 0      | 169    | 740    | 894    | 916    | 731    |
| Family Medicine               | 1235   | 1172   | 1528   | 1487   | 1507   | 1328   | 2196   | 1739   | 1472   | 1750   |
| Internal Medicine/Medicine    | 115016 | 115950 | 111668 | 111459 | 115327 | 119832 | 120062 | 132678 | 134551 | 139263 |
| Neurology                     | 9544   | 8462   | 8315   | 10030  | 9009   | 9960   | 10802  | 11276  | 9092   | 11524  |
| Neurosurgery                  | 592    | 531    | 582    | 600    | 1739   | 1820   | 1644   | 2273   | 3672   | 4010   |
| Obstetrics and Gynecology     | 2392   | 2382   | 2526   | 2622   | 2685   | 2442   | 2154   | 1666   | 1762   | 2863   |
| Ophthalmology                 | 2879   | 3175   | 4438   | 4390   | 4005   | 3857   | 3762   | 4064   | 4869   | 4752   |
| Orthopedics                   | 1751   | 2082   | 1823   | 1617   | 1686   | 1676   | 1832   | 1568   | 1675   | 2073   |
| Otolaryngology                | 2477   | 3339   | 2847   | 3672   | 3961   | 3768   | 4342   | 4372   | 4284   | 4832   |
| Pathology                     | 327477 | 291955 | 262466 | 26906  | 24478  | 24051  | 25070  | 24675  | 22805  | 20179  |
| Pediatrics                    | 24470  | 24006  | 22657  | 21653  | 24482  | 24548  | 21927  | 24246  | 25047  | 25786  |
| Physical Medicine & Rehab     | 1431   | 1068   | 1092   | 844    | 939    | 1004   | 1063   | 1287   | 1263   | 1605   |
| Plastic Surgery               | 0      | 0      | 0      | 0      | 0      | 0      | 0      | 0      | 0      | 0      |
| Psychiatry                    | 20056  | 20663  | 20323  | 19112  | 18134  | 20311  | 21132  | 21545  | 22702  | 26075  |
| Radiation-Diagnostic/Oncology | 5579   | 4095   | 4651   | 4886   | 5477   | 7208   | 6005   | 7795   | 7771   | 6639   |
| Surgery                       | 12609  | 12273  | 11253  | 10806  | 10501  | 12327  | 13198  | 16012  | 17863  | 16442  |
| Urology                       | 1084   | 1224   | 1151   | 1166   | 648    | 906    | 623    | 355    | 989    | 1156   |

Inflation-Adjusted Total NIH training grant (F32, T32) funding in thousands of dollars from 2011-2020 by specialty

| F32                           | 1.000  | 0.982  | 0.964  | 0.946  | 0.935  | 0.928  | 0.911  | 0.891  | 0.874  | 0.862  | 2020   |
|-------------------------------|--------|--------|--------|--------|--------|--------|--------|--------|--------|--------|--------|
| Anesthesiology                | 192    | 303    | 383    | 289    | 22     | 54     | 156    | 257    | 107    | 336    | 336    |
| Dermatology                   | 173    | 219    | 150    | 81     | 139    | 155    | 211    | 208    | 58     | 171    | 171    |
| Emergency Medicine            | 59     | 53     | 60     | 0      | 0      | 0      | 0      | 0      | 0      | 56     | 56     |
| Family Medicine               | 0      | 0      | 0      | 53     | 19     | 0      | 0      | 0      | 0      | 0      | 0      |
| Internal Medicine/Medicine    | 6543   | 5699   | 5641   | 5244   | 5456   | 5953   | 5684   | 5732   | 5827   | 6638   | 6638   |
| Neurology                     | 732    | 441    | 930    | 1456   | 1363   | 1202   | 1125   | 1354   | 1384   | 1201   | 1201   |
| Neurosurgery                  | 421    | 358    | 326    | 391    | 470    | 499    | 482    | 714    | 387    | 626    | 626    |
| Obstetrics and Gynecology     | 209    | 285    | 169    | 203    | 258    | 212    | 133    | 317    | 271    | 262    | 262    |
| Ophthalmology                 | 180    | 345    | 371    | 465    | 602    | 369    | 392    | 374    | 465    | 489    | 489    |
| Orthopedics                   | 247    | 283    | 243    | 219    | 300    | 267    | 302    | 382    | 390    | 406    | 406    |
| Otolaryngology                | 527    | 377    | 342    | 481    | 278    | 430    | 542    | 483    | 437    | 374    | 374    |
| Pathology                     | 1141   | 849    | 921    | 968    | 1129   | 1269   | 813    | 937    | 856    | 626    | 626    |
| Pediatrics                    | 1339   | 1391   | 1202   | 1163   | 811    | 717    | 672    | 679    | 1012   | 575    | 575    |
| Physical Medicine & Rehab     | 51     | 51     | 0      | 53     | 38     | 64     | 171    | 219    | 172    | 118    | 118    |
| Plastic Surgery               | 0      | 0      | 0      | 0      | 0      | 0      | 0      | 0      | 62     | 0      | 0      |
| Psychiatry                    | 1921   | 1366   | 1271   | 1186   | 1332   | 1447   | 1074   | 1234   | 1485   | 1742   | 1742   |
| Radiation-Diagnostic/Oncology | 708    | 393    | 178    | 52     | 105    | 443    | 349    | 382    | 235    | 393    | 393    |
| Surgery                       | 831    | 746    | 638    | 930    | 1075   | 953    | 859    | 1145   | 881    | 941    | 941    |
| Urology                       | 116    | 104    | 107    | 211    | 113    | 145    | 108    | 66     | 58     | 69     | 69     |
| T32                           | 2305   | 2594   | 2632   | 3082   | 4502   | 4608   | 4897   | 4487   | 4440   | 3876   | 3876   |
| Dermatology                   | 2246   | 2402   | 2182   | 1741   | 2206   | 2187   | 2067   | 1942   | 1710   | 1754   | 1754   |
| Emergency Medicine            | 0      | 0      | 0      | 0      | 0      | 157    | 674    | 796    | 800    | 630    | 630    |
| Family Medicine               | 1235   | 1151   | 1474   | 1407   | 1410   | 1232   | 2002   | 1549   | 1286   | 1509   | 1509   |
| Internal Medicine/Medicine    | 115016 | 113866 | 107687 | 105445 | 107871 | 111165 | 109429 | 118174 | 117542 | 120064 | 120064 |
| Neurology                     | 9544   | 8310   | 8019   | 9489   | 8427   | 9240   | 9845   | 10043  | 7943   | 9935   | 9935   |
| Neurosurgery                  | 592    | 521    | 561    | 568    | 1627   | 1688   | 1498   | 2025   | 3208   | 3457   | 3457   |
| Obstetrics and Gynecology     | 2392   | 2339   | 2436   | 2481   | 2511   | 2265   | 1963   | 1484   | 1539   | 2468   | 2468   |



|                               |             |             |             |             |             |             |             |             |             |             |
|-------------------------------|-------------|-------------|-------------|-------------|-------------|-------------|-------------|-------------|-------------|-------------|
| Neurosurgery                  | 298         | 237         | 122         | 0           | 0           | 97          | 0           | 283         | 397         | 283         |
| Obstetrics and Gynecology     | 279         | 168         | 302         | 605         | 729         | 688         | 869         | 687         | 895         | 960         |
| Ophthalmology                 | 0           | 0           | 0           | 124         | 0           | 0           | 132         | 225         | 227         | 125         |
| Orthopedics                   | 618         | 464         | 779         | 804         | 1034        | 821         | 684         | 548         | 612         | 507         |
| Otolaryngology                | 274         | 269         | 264         | 246         | 0           | 0           | 0           | 0           | 0           | 112         |
| Pathology                     | 1538        | 1606        | 1637        | 1419        | 1410        | 1866        | 1919        | 2101        | 1810        | 2383        |
| Pediatrics                    | 2485        | 2102        | 2204        | 2332        | 2033        | 2863        | 2876        | 2722        | 3016        | 3097        |
| Physical Medicine & Rehab     | 344         | 358         | 472         | 693         | 808         | 920         | 1537        | 1482        | 1167        | 1302        |
| Plastic Surgery               | 0           | 0           | 0           | 0           | 0           | 0           | 0           | 0           | 0           | 0           |
| Psychiatry                    | 12041       | 11933       | 10648       | 10816       | 10038       | 9444        | 9547        | 9075        | 9698        | 10535       |
| Radiation-Diagnostic/Oncology | 2091        | 1926        | 1463        | 1490        | 1599        | 1789        | 2465        | 2171        | 1687        | 1304        |
| Surgery                       | 999         | 846         | 1196        | 838         | 1266        | 1592        | 1897        | 1416        | 1200        | 872         |
| Urology                       | 106         | 104         | 102         | 130         | 412         | 551         | 771         | 623         | 611         | 749         |
| <b>K08</b>                    | <b>2011</b> | <b>2012</b> | <b>2013</b> | <b>2014</b> | <b>2015</b> | <b>2016</b> | <b>2017</b> | <b>2018</b> | <b>2019</b> | <b>2020</b> |
| Anesthesiology                | 1636        | 1798        | 1997        | 2152        | 1983        | 1909        | 2426        | 3377        | 3945        | 3431        |
| Dermatology                   | 2225        | 2268        | 1869        | 1639        | 1686        | 1794        | 1785        | 1605        | 1761        | 1404        |
| Emergency Medicine            | 283         | 558         | 844         | 561         | 698         | 1012        | 1035        | 1144        | 972         | 966         |
| Family Medicine               | 611         | 605         | 654         | 260         | 138         | 135         | 153         | 150         | 450         | 435         |
| Internal Medicine/Medicine    | 37528       | 35693       | 32091       | 32393       | 29952       | 34489       | 34127       | 37054       | 40718       | 40627       |
| Neurology                     | 6333        | 5678        | 6353        | 5477        | 5428        | 5024        | 5180        | 5069        | 5700        | 6372        |
| Neurosurgery                  | 1160        | 1175        | 1394        | 1091        | 1551        | 1732        | 2025        | 1789        | 2070        | 1556        |
| Obstetrics and Gynecology     | 1072        | 1058        | 918         | 566         | 228         | 347         | 304         | 808         | 970         | 1444        |
| Ophthalmology                 | 4904        | 4972        | 5146        | 5841        | 5716        | 5042        | 5015        | 4703        | 4415        | 4205        |
| Orthopedics                   | 179         | 264         | 500         | 414         | 454         | 808         | 1095        | 918         | 740         | 854         |
| Otolaryngology                | 1995        | 2150        | 2046        | 1734        | 2119        | 1919        | 1535        | 1722        | 1893        | 1621        |
| Pathology                     | 4861        | 4209        | 4409        | 4597        | 4269        | 3645        | 3466        | 4169        | 4123        | 4505        |
| Pediatrics                    | 15014       | 12982       | 12498       | 11704       | 10916       | 12449       | 15623       | 17411       | 16945       | 16185       |
| Physical Medicine & Rehab     | 125         | 123         | 121         | 0           | 0           | 0           | 0           | 152         | 149         | 148         |
| Plastic Surgery               | 0           | 0           | 0           | 0           | 0           | 0           | 0           | 0           | 0           | 0           |
| Psychiatry                    | 5684        | 4933        | 3170        | 4259        | 3465        | 3613        | 3886        | 3294        | 2844        | 3674        |
| Radiation-Diagnostic/Oncology | 811         | 805         | 791         | 866         | 778         | 160         | 485         | 543         | 2523        | 3239        |
| Surgery                       | 7904        | 7900        | 6433        | 6217        | 5070        | 5684        | 5781        | 6531        | 6686        | 7174        |
| Urology                       | 1217        | 1175        | 1341        | 1003        | 619         | 764         | 768         | 739         | 971         | 947         |
| <b>K23</b>                    | <b>2011</b> | <b>2012</b> | <b>2013</b> | <b>2014</b> | <b>2015</b> | <b>2016</b> | <b>2017</b> | <b>2018</b> | <b>2019</b> | <b>2020</b> |
| Anesthesiology                | 1200        | 1530        | 1773        | 1925        | 1733        | 1427        | 2048        | 1919        | 2685        | 2567        |
| Dermatology                   | 368         | 482         | 243         | 116         | 240         | 621         | 633         | 1215        | 1360        | 1154        |
| Emergency Medicine            | 2344        | 2073        | 2229        | 2042        | 2070        | 2888        | 3402        | 2969        | 3127        | 2233        |
| Family Medicine               | 1388        | 1233        | 869         | 416         | 606         | 543         | 736         | 713         | 860         | 948         |
| Internal Medicine/Medicine    | 44386       | 45346       | 44041       | 41699       | 37963       | 40250       | 39418       | 39267       | 39270       | 43310       |
| Neurology                     | 8996        | 8800        | 7501        | 7930        | 8074        | 6522        | 7988        | 8324        | 8999        | 9082        |
| Neurosurgery                  | 372         | 699         | 889         | 657         | 786         | 674         | 669         | 655         | 810         | 968         |
| Obstetrics and Gynecology     | 1602        | 1774        | 1338        | 1604        | 1085        | 601         | 1042        | 1204        | 1515        | 1754        |
| Ophthalmology                 | 2853        | 2305        | 2550        | 2117        | 2519        | 3776        | 4158        | 3615        | 3942        | 3650        |
| Orthopedics                   | 337         | 384         | 309         | 301         | 182         | 322         | 158         | 329         | 432         | 472         |
| Otolaryngology                | 1485        | 1229        | 1191        | 1799        | 2431        | 1989        | 2218        | 2165        | 2007        | 1572        |
| Pathology                     | 517         | 393         | 256         | 383         | 259         | 127         | 133         | 126         | 166         | 455         |
| Pediatrics                    | 12950       | 12514       | 11862       | 11458       | 10265       | 9511        | 13565       | 14588       | 16445       | 19211       |
| Physical Medicine & Rehab     | 994         | 926         | 1457        | 1550        | 1221        | 1142        | 904         | 240         | 397         | 381         |
| Plastic Surgery               | 0           | 0           | 0           | 0           | 0           | 0           | 0           | 0           | 0           | 0           |
| Psychiatry                    | 19068       | 17876       | 16241       | 15245       | 14635       | 14210       | 16482       | 15952       | 16903       | 16934       |
| Radiation-Diagnostic/Oncology | 952         | 647         | 609         | 615         | 605         | 644         | 659         | 320         | 171         | 498         |
| Surgery                       | 1704        | 1641        | 1426        | 1487        | 1374        | 1800        | 1467        | 1305        | 1359        | 1936        |
| Urology                       | 314         | 151         | 286         | 440         | 282         | 404         | 284         | 128         | 441         | 434         |

Supplementary Table 9: Total NIH advanced career grant (R01, R03, R21, P30, U01) funding in thousands of dollars from 2011-2020 by specialty

|                               |             |             |             |             |             |             |             |             |             |             |
|-------------------------------|-------------|-------------|-------------|-------------|-------------|-------------|-------------|-------------|-------------|-------------|
| <b>R01</b>                    | <b>2011</b> | <b>2012</b> | <b>2013</b> | <b>2014</b> | <b>2015</b> | <b>2016</b> | <b>2017</b> | <b>2018</b> | <b>2019</b> | <b>2020</b> |
| Anesthesiology                | 74515       | 84338       | 81634       | 88148       | 84338       | 85814       | 88443       | 105316      | 110591      | 120792      |
| Dermatology                   | 39821       | 43881       | 41550       | 39382       | 39803       | 42030       | 39871       | 48634       | 50513       | 49680       |
| Emergency Medicine            | 12119       | 12903       | 13802       | 15519       | 16628       | 18528       | 21356       | 24195       | 31063       | 40629       |
| Family Medicine               | 37541       | 41499       | 36942       | 33725       | 38982       | 38711       | 38849       | 45070       | 45999       | 52595       |
| Internal Medicine/Medicine    | 1291238     | 1251856     | 1150256     | 1184510     | 1191770     | 1289757     | 1394581     | 1518667     | 1645808     | 1793562     |
| Neurology                     | 213323      | 221996      | 213488      | 217259      | 219583      | 245691      | 282468      | 336910      | 347790      | 416638      |
| Neurosurgery                  | 48188       | 50932       | 46894       | 47635       | 61235       | 65217       | 69463       | 77096       | 85492       | 97974       |
| Obstetrics and Gynecology     | 50170       | 47030       | 47914       | 48015       | 52140       | 63774       | 75443       | 79065       | 97330       | 115259      |
| Ophthalmology                 | 143557      | 146741      | 143466      | 156156      | 147880      | 147840      | 157163      | 169590      | 186335      | 198853      |
| Orthopedics                   | 37635       | 40769       | 44058       | 44466       | 42092       | 47136       | 51958       | 55502       | 60828       | 70145       |
| Otolaryngology                | 51992       | 55813       | 56307       | 58138       | 63423       | 63655       | 67549       | 78620       | 91749       | 91134       |
| Pathology                     | 324176      | 318396      | 294584      | 279372      | 287786      | 295775      | 297770      | 33357       | 360175      | 382711      |
| Pediatrics                    | 312475      | 336173      | 311585      | 323344      | 314062      | 312097      | 29934       | 325846      | 344660      | 393939      |
| Physical Medicine & Rehab     | 11247       | 13076       | 13203       | 15088       | 13669       | 17536       | 23490       | 27050       | 28451       | 30755       |
| Plastic Surgery               | 967         | 0           | 537         | 302         | 0           | 0           | 333         | 0           | 284         | 0           |
| Psychiatry                    | 470253      | 459342      | 406053      | 420040      | 400779      | 431651      | 454570      | 494086      | 510676      | 54599       |
| Radiation-Diagnostic/Oncology | 205633      | 208397      | 202747      | 201325      | 211587      | 231175      | 256833      | 293765      | 305237      | 311946      |
| Surgery                       | 146686      | 140198      | 127421      | 134551      | 142824      | 145184      | 162932      | 176766      | 202367      | 229416      |
| Urology                       | 24013       | 25102       | 25021       | 23243       | 21703       | 20603       | 23240       | 24148       | 25147       | 28303       |
| <b>R03</b>                    | <b>2011</b> | <b>2012</b> | <b>2013</b> | <b>2014</b> | <b>2015</b> | <b>2016</b> | <b>2017</b> | <b>2018</b> | <b>2019</b> | <b>2020</b> |
| Anesthesiology                | 450081      | 721092      | 442962      | 532855      | 322574      | 308213      | 386668      | 763750      | 792285      | 627476      |
| Dermatology                   | 325896      | 415990      | 151115      | 318146      | 629917      | 704687      | 535792      | 310250      | 389937      | 515420      |
| Emergency Medicine            | 63905       | 86342       | 68643       | 114000      | 41539       | 415491      | 451612      | 350895      | 194750      | 345317      |
| Family Medicine               | 736834      | 719578      | 845671      | 507967      | 429418      | 40752       | 155583      | 179250      | 552565      | 412944      |
| Internal Medicine/Medicine    | 9494800     | 11557791    | 10699669    | 10753491    | 9694220     | 7907586     | 7842786     | 8562404     | 11413933    | 1302676     |

|    |                               |             |             |             |             |             |             |             |             |             |             |
|----|-------------------------------|-------------|-------------|-------------|-------------|-------------|-------------|-------------|-------------|-------------|-------------|
| 1  | Neurology                     | 96465       | 656875      | 855875      | 1051369     | 1257543     | 1688365     | 1381103     | 1185473     | 1536028     | 1461973     |
| 2  | Neurosurgery                  | 39134       | 780722      | 767885      | 386897      | 593779      | 357615      | 16180       | 161079      | 160250      | 565458      |
| 3  | Obstetrics and Gynecology     | 600862      | 864239      | 764424      | 803596      | 746483      | 1003704     | 1331211     | 139082      | 1124544     | 764667      |
| 4  | Ophthalmology                 | 0           | 0           | 0           | 195625      | 271238      | 81000       | 117750      | 19400       | 322473      | 329957      |
| 5  | Orthopedics                   | 816678      | 787365      | 876856      | 1189895     | 818017      | 500294      | 231895      | 359624      | 739085      | 632940      |
| 6  | Otolaryngology                | 1718440     | 2272345     | 2379761     | 1968522     | 1885934     | 1684593     | 1797130     | 1311104     | 320436      | 474811      |
| 7  | Pathology                     | 1925448     | 1586299     | 1437747     | 1451656     | 1241119     | 736439      | 1033500     | 1799423     | 2429442     | 2721395     |
| 8  | Pediatrics                    | 2921374     | 2413639     | 2699566     | 2605049     | 302260      | 4009767     | 3103581     | 3812411     | 321513      | 370533      |
| 9  | Physical Medicine & Rehab     | 672323      | 544268      | 461397      | 600245      | 412624      | 395279      | 172249      | 491150      | 839096      | 725944      |
| 10 | Plastic Surgery               | 0           | 0           | 0           | 0           | 0           | 77000       | 77625       | 0           | 0           | 0           |
| 11 | Psychiatry                    | 2652569     | 2711582     | 2647613     | 2383628     | 2119936     | 2248675     | 2639599     | 211641      | 1885175     | 1799338     |
| 12 | Radiation-Diagnostic/Oncology | 783679      | 518000      | 742731      | 1377746     | 1544365     | 72650       | 928242      | 1578939     | 2227240     | 212738      |
| 13 | Surgery                       | 1364197     | 1739046     | 1377657     | 1564172     | 1504562     | 1191847     | 2115365     | 1802267     | 102415      | 1631792     |
| 14 | Urology                       | 78000       | 240620      | 153455      | 355604      | 471148      | 299855      | 81000       | 84750       | 285251      | 382561      |
| 15 | <b>R21</b>                    | <b>2011</b> | <b>2012</b> | <b>2013</b> | <b>2014</b> | <b>2015</b> | <b>2016</b> | <b>2017</b> | <b>2018</b> | <b>2019</b> | <b>2020</b> |
| 16 | Anesthesiology                | 5363        | 4959        | 5614        | 5048        | 6017        | 6011        | 5305        | 7608        | 9044        | 7261        |
| 17 | Dermatology                   | 3480        | 3878        | 3706        | 4881        | 3694        | 2887        | 3101        | 3214        | 3172        | 4305        |
| 18 | Emergency Medicine            | 1418        | 1238        | 677         | 1135        | 1061        | 859         | 1056        | 1709        | 1601        | 1225        |
| 19 | Family Medicine               | 2736        | 3339        | 3520        | 3912        | 4672        | 4043        | 2436        | 2462        | 2749        | 3270        |
| 20 | Internal Medicine/Medicine    | 77517       | 82201       | 76486       | 74078       | 74281       | 79671       | 76564       | 76594       | 77444       | 84910       |
| 21 | Neurology                     | 12904       | 15721       | 14688       | 14878       | 15211       | 16928       | 17462       | 19479       | 25806       | 20145       |
| 22 | Neurosurgery                  | 2414        | 3721        | 4435        | 4831        | 7289        | 7888        | 5719        | 5571        | 11745       | 10119       |
| 23 | Obstetrics and Gynecology     | 6800        | 5278        | 5734        | 4890        | 5247        | 4730        | 4449        | 5749        | 6279        | 9901        |
| 24 | Ophthalmology                 | 3884        | 3860        | 5863        | 5643        | 8032        | 6662        | 4941        | 6515        | 11474       | 11215       |
| 25 | Orthopedics                   | 2763        | 3619        | 3394        | 2686        | 2878        | 2916        | 5150        | 7074        | 4837        | 5113        |
| 26 | Otolaryngology                | 2673        | 3242        | 4612        | 5060        | 4484        | 2935        | 2973        | 5233        | 5598        | 6832        |
| 27 | Pathology                     | 24267       | 21316       | 22457       | 28845       | 33013       | 33180       | 28281       | 24359       | 24053       | 25734       |
| 28 | Pediatrics                    | 19943       | 19426       | 19820       | 22098       | 24760       | 24980       | 23663       | 24697       | 27382       | 30329       |
| 29 | Physical Medicine & Rehab     | 781         | 1430        | 2185        | 1664        | 700         | 1979        | 2772        | 2106        | 2839        | 2457        |
| 30 | Plastic Surgery               | 0           | 0           | 0           | 0           | 0           | 0           | 0           | 0           | 0           | 0           |
| 31 | Psychiatry                    | 25223       | 34861       | 38259       | 36372       | 31818       | 31144       | 31685       | 31006       | 33529       | 39248       |
| 32 | Radiation-Diagnostic/Oncology | 20438       | 21778       | 20271       | 23694       | 25496       | 24020       | 22735       | 18066       | 21872       | 24859       |
| 33 | Surgery                       | 11149       | 10662       | 8942        | 10237       | 12823       | 13371       | 9947        | 9617        | 10320       | 12471       |
| 34 | Urology                       | 1626        | 1730        | 838         | 740         | 1802        | 2463        | 1761        | 1385        | 1519        | 2247        |
| 35 | <b>P30</b>                    | <b>2011</b> | <b>2012</b> | <b>2013</b> | <b>2014</b> | <b>2015</b> | <b>2016</b> | <b>2017</b> | <b>2018</b> | <b>2019</b> | <b>2020</b> |
| 36 | Anesthesiology                | 0           | 0           | 0           | 1000        | 0           | 0           | 0           | 0           | 0           | 0           |
| 37 | Dermatology                   | 5597        | 4335        | 6056        | 6889        | 6479        | 7431        | 6547        | 3292        | 3102        | 3109        |
| 38 | Emergency Medicine            | 0           | 0           | 0           | 0           | 0           | 0           | 0           | 0           | 0           | 0           |
| 39 | Family Medicine               | 0           | 480         | 473         | 475         | 475         | 475         | 1499        | 1632        | 2024        | 2317        |
| 40 | Internal Medicine/Medicine    | 296235      | 320454      | 339482      | 395655      | 359149      | 370938      | 382260      | 390765      | 453863      | 491128      |
| 41 | Neurology                     | 13644       | 15063       | 13998       | 12964       | 13371       | 14593       | 14617       | 16643       | 21105       | 49014       |
| 42 | Neurosurgery                  | 1890        | 2651        | 2501        | 1789        | 1749        | 638         | 625         | 612         | 698         | 0           |
| 43 | Obstetrics and Gynecology     | 5801        | 5801        | 5158        | 5379        | 5786        | 5762        | 0           | 2477        | 2907        | 5170        |
| 44 | Ophthalmology                 | 18749       | 21609       | 17624       | 17284       | 16661       | 15685       | 15703       | 17556       | 17588       | 17215       |
| 45 | Orthopedics                   | 2502        | 2510        | 2391        | 3072        | 3059        | 3517        | 3485        | 3459        | 4536        | 4510        |
| 46 | Otolaryngology                | 4978        | 4832        | 4602        | 4455        | 2996        | 2292        | 615         | 5495        | 5130        | 7681        |
| 47 | Pathology                     | 24994       | 17233       | 36305       | 36242       | 33708       | 42777       | 35624       | 14090       | 12858       | 16375       |
| 48 | Pediatrics                    | 26289       | 23223       | 22244       | 17069       | 16976       | 14906       | 14370       | 10935       | 11681       | 17155       |
| 49 | Physical Medicine & Rehab     | 0           | 0           | 0           | 0           | 0           | 0           | 0           | 0           | 0           | 0           |
| 50 | Plastic Surgery               | 0           | 0           | 0           | 0           | 0           | 0           | 0           | 0           | 0           | 0           |
| 51 | Psychiatry                    | 17668       | 17159       | 19520       | 16179       | 18316       | 13464       | 11666       | 9558        | 8712        | 9759        |
| 52 | Radiation-Diagnostic/Oncology | 2851        | 3786        | 4292        | 5930        | 11823       | 6816        | 8877        | 8628        | 11308       | 12897       |
| 53 | Surgery                       | 25238       | 21484       | 24298       | 15973       | 25296       | 25363       | 37629       | 34242       | 29825       | 42739       |
| 54 | Urology                       | 4835        | 4726        | 3941        | 5304        | 5342        | 6332        | 0           | 0           | 0           | 0           |
| 55 | <b>U01</b>                    | <b>2011</b> | <b>2012</b> | <b>2013</b> | <b>2014</b> | <b>2015</b> | <b>2016</b> | <b>2017</b> | <b>2018</b> | <b>2019</b> | <b>2020</b> |
| 56 | Anesthesiology                | 3304        | 3157        | 3516        | 6975        | 5936        | 12086       | 9053        | 8374        | 11426       | 10257       |
| 57 | Dermatology                   | 810         | 2506        | 2458        | 2239        | 4082        | 2749        | 3182        | 3562        | 8176        | 5268        |
| 58 | Emergency Medicine            | 18243       | 16875       | 8205        | 7022        | 4410        | 3305        | 6454        | 25263       | 1974        | 14284       |
| 59 | Family Medicine               | 5269        | 8212        | 8912        | 9833        | 11830       | 9649        | 6264        | 8843        | 9972        | 8087        |
| 60 | Internal Medicine/Medicine    | 394866      | 38472       | 42765       | 416081      | 369849      | 355612      | 392159      | 420565      | 616327      | 698031      |
| 61 | Neurology                     | 61745       | 68819       | 71516       | 79220       | 64682       | 87852       | 70398       | 111816      | 102885      | 139249      |
| 62 | Neurosurgery                  | 4610        | 4594        | 15655       | 15038       | 11441       | 25764       | 27265       | 13884       | 6841        | 5592        |
| 63 | Obstetrics and Gynecology     | 25401       | 17051       | 5216        | 11010       | 47414       | 9749        | 8790        | 12287       | 8037        | 8465        |
| 64 | Ophthalmology                 | 2346        | 2450        | 1937        | 1356        | 2967        | 3727        | 3876        | 6158        | 6809        | 7941        |
| 65 | Orthopedics                   | 0           | 0           | 522         | 657         | 197         | 197         | 0           | 0           | 705         | 648         |
| 66 | Otolaryngology                | 1413        | 830         | 1142        | 1049        | 2611        | 2399        | 2901        | 4027        | 2151        | 3110        |
| 67 | Pathology                     | 45262       | 29680       | 27222       | 19653       | 19641       | 24847       | 27061       | 32524       | 29907       | 32182       |
| 68 | Pediatrics                    | 98053       | 99346       | 91102       | 101082      | 94017       | 85032       | 84977       | 87933       | 82760       | 73893       |
| 69 | Physical Medicine & Rehab     | 569         | 622         | 3799        | 3484        | 3891        | 3623        | 3575        | 1940        | 5081        | 7806        |
| 70 | Plastic Surgery               | 0           | 0           | 0           | 0           | 0           | 0           | 0           | 430         | 430         | 430         |
| 71 | Psychiatry                    | 41548       | 58726       | 53470       | 60941       | 67383       | 59380       | 51370       | 58615       | 92704       | 78939       |
| 72 | Radiation-Diagnostic/Oncology | 6629        | 8597        | 13873       | 17159       | 19558       | 17338       | 35114       | 37462       | 39601       | 38376       |
| 73 | Surgery                       | 29433       | 39199       | 38813       | 34289       | 40167       | 35721       | 31847       | 39184       | 40171       | 32722       |
| 74 | Urology                       | 13453       | 11343       | 11810       | 7735        | 6550        | 7265        | 7641        | 6918        | 10617       | 5158        |

Inflation-Adjusted Total NIH advanced career grant (R01, R03, R21, P30, U01) funding in thousands of dollars from 2011-2020 by specialty

|    |                    |             |             |             |             |             |             |             |             |             |             |
|----|--------------------|-------------|-------------|-------------|-------------|-------------|-------------|-------------|-------------|-------------|-------------|
| 75 | <b>R01</b>         | <b>2011</b> | <b>2012</b> | <b>2013</b> | <b>2014</b> | <b>2015</b> | <b>2016</b> | <b>2017</b> | <b>2018</b> | <b>2019</b> | <b>2020</b> |
| 76 | Anesthesiology     | 74515       | 82822       | 78723       | 83392       | 78886       | 79607       | 80610       | 93803       | 96611       | 104140      |
| 77 | Dermatology        | 39821       | 43092       | 40069       | 37257       | 37230       | 38990       | 36340       | 43317       | 44127       | 42831       |
| 78 | Emergency Medicine | 12119       | 12671       | 13310       | 14682       | 15553       | 17188       | 19465       | 21550       | 27136       | 35028       |
| 79 | Family Medicine    | 37541       | 40753       | 35625       | 31905       | 36462       | 35911       | 35408       | 40143       | 40184       | 45344       |





|                               |       |       |       |       |       |       |       |       |       |        |
|-------------------------------|-------|-------|-------|-------|-------|-------|-------|-------|-------|--------|
| Neurology                     | 61745 | 67582 | 68966 | 74945 | 60500 | 81498 | 64163 | 99592 | 89879 | 120052 |
| Neurosurgery                  | 4610  | 4511  | 15097 | 14227 | 10701 | 23901 | 24850 | 12366 | 5976  | 4821   |
| Obstetrics and Gynecology     | 25401 | 16745 | 5030  | 10416 | 44349 | 9044  | 8012  | 10944 | 7021  | 7298   |
| Ophthalmology                 | 2346  | 2406  | 1868  | 1283  | 2775  | 3457  | 3533  | 5485  | 5948  | 6846   |
| Orthopedics                   | 0     | 0     | 503   | 622   | 184   | 183   | 0     | 0     | 616   | 559    |
| Otolaryngology                | 1413  | 815   | 1101  | 992   | 2442  | 2225  | 2644  | 3587  | 1879  | 2681   |
| Pathology                     | 45262 | 29147 | 26251 | 18593 | 18371 | 23050 | 24664 | 28968 | 26126 | 27745  |
| Pediatrics                    | 98053 | 97561 | 87854 | 95628 | 87939 | 78882 | 77451 | 78320 | 72298 | 63706  |
| Physical Medicine & Rehab     | 569   | 611   | 3664  | 3296  | 3639  | 3361  | 3258  | 1728  | 4439  | 6730   |
| Plastic Surgery               | 0     | 0     | 0     | 0     | 0     | 0     | 0     | 383   | 376   | 371    |
| Psychiatry                    | 41548 | 57671 | 51564 | 57653 | 63027 | 55085 | 46821 | 52207 | 80985 | 68057  |
| Radiation-Diagnostic/Oncology | 6629  | 8442  | 13378 | 16233 | 18294 | 16084 | 32004 | 33367 | 34595 | 33086  |
| Surgery                       | 29433 | 38495 | 37429 | 32439 | 37570 | 33137 | 29027 | 34900 | 35093 | 28211  |
| Urology                       | 13453 | 11139 | 11389 | 7318  | 6127  | 6740  | 6964  | 6162  | 9275  | 4447   |

Supplementary Table 10: Dollar amount for each NIH training grant (F32, T32) spent per active physician from 2011-2020 by specialty

| F32                           | 2011    | 2012    | 2013    | 2014    | 2015    | 2016    | 2017    | 2018    | 2019    | 2020    |
|-------------------------------|---------|---------|---------|---------|---------|---------|---------|---------|---------|---------|
| Anesthesiology                | 4.78    | 7.64    | 9.74    | 7.42    | 0.57    | 1.4     | 4.1     | 6.85    | 2.88    | 9.23    |
| Dermatology                   | 16.02   | 20.11   | 13.69   | 7.43    | 12.72   | 14.03   | 19.18   | 18.95   | 5.28    | 15.79   |
| Emergency Medicine            | 1.74    | 1.52    | 1.67    | 0       | 0       | 0       | 0       | 0       | 0       | 1.44    |
| Family Medicine               | 0       | 0       | 0       | 0.51    | 0.18    | 0       | 0       | 0       | 0       | 0       |
| Internal Medicine/Medicine    | 60.00   | 52.73   | 52.68   | 49.24   | 51.13   | 55.89   | 53.96   | 54.6    | 55.5    | 64.07   |
| Neurology                     | 56.70   | 34.41   | 73.72   | 115.95  | 108.80  | 95.65   | 89.98   | 10.08   | 111.97  | 98.51   |
| Neurosurgery                  | 83.50   | 71.52   | 65.43   | 78.52   | 94.00   | 99.01   | 95.66   | 142.17  | 76.98   | 126.36  |
| Obstetrics and Gynecology     | 5.19    | 7.15    | 4.29    | 5.23    | 6.65    | 5.51    | 3.51    | 8.43    | 7.26    | 7.12    |
| Ophthalmology                 | 10.05   | 19.35   | 21.02   | 26.6    | 34.64   | 21.27   | 22.87   | 22.01   | 27.56   | 29.37   |
| Orthopedics                   | 12.45   | 14.72   | 13.01   | 12.01   | 16.79   | 15.13   | 17.44   | 22.53   | 23.41   | 24.71   |
| Otolaryngology                | 57.13   | 41.39   | 38.07   | 54.29   | 31.56   | 48.85   | 62.45   | 56.16   | 51.1    | 44.43   |
| Pathology                     | 76.21   | 60.31   | 69.66   | 75.78   | 90.87   | 104.76  | 69.50   | 82.55   | 77.49   | 57.4    |
| Pediatrics                    | 24.12   | 25.33   | 22.15   | 21.59   | 15.07   | 13.34   | 12.61   | 12.81   | 19.1    | 11.01   |
| Physical Medicine & Rehab     | 6.04    | 5.95    | 0       | 6.2     | 4.45    | 7.45    | 20.15   | 25.75   | 20.18   | 14.01   |
| Plastic Surgery               | 0       | 0       | 0       | 0       | 0       | 0       | 0       | 0       | 9.64    | 0       |
| Psychiatry                    | 50.17   | 36.82   | 35.34   | 33.44   | 37.73   | 41.09   | 30.83   | 35.99   | 43.81   | 52.11   |
| Radiation-Diagnostic/Oncology | 21.82   | 11.38   | 4.91    | 1.44    | 2.89    | 12.18   | 9.61    | 10.57   | 6.52    | 11.04   |
| Surgery                       | 31.58   | 29.51   | 26.28   | 38.96   | 45.51   | 40.85   | 37.60   | 50.79   | 39.44   | 42.67   |
| Urology                       | 11.85   | 10.83   | 11.39   | 22.73   | 12.31   | 15.78   | 11.92   | 7.36    | 6.43    | 7.88    |
| T32                           | 2011    | 2012    | 2013    | 2014    | 2015    | 2016    | 2017    | 2018    | 2019    | 2020    |
| Anesthesiology                | 57.45   | 65.31   | 66.96   | 79.36   | 116.40  | 119.52  | 128.66  | 119.92  | 120.27  | 106.38  |
| Dermatology                   | 207.61  | 220.53  | 199.12  | 159.48  | 201.52  | 198.46  | 188.16  | 177.45  | 156.36  | 162.62  |
| Emergency Medicine            | 0       | 0       | 0       | 0       | 0       | 4.12    | 17.46   | 20.42   | 20.27   | 16.17   |
| Family Medicine               | 11.59   | 10.88   | 14.03   | 13.50   | 13.54   | 11.82   | 19.34   | 15.01   | 12.46   | 14.80   |
| Internal Medicine/Medicine    | 1054.73 | 1053.63 | 100.59  | 990.15  | 1010.85 | 1043.62 | 1038.99 | 1125.69 | 1119.66 | 1158.87 |
| Neurology                     | 738.92  | 649.11  | 632.01  | 755.62  | 672.69  | 734.84  | 787.50  | 809.40  | 642.70  | 814.60  |
| Neurosurgery                  | 117.21  | 104.03  | 112.52  | 114.08  | 325.3   | 334.6   | 297.2   | 403.1   | 638.7   | 697.7   |
| Obstetrics and Gynecology     | 59.25   | 58.68   | 61.87   | 63.72   | 64.74   | 58.75   | 51.7    | 39.48   | 41.24   | 67.03   |
| Ophthalmology                 | 160.46  | 175.12  | 242.27  | 237.86  | 215.42  | 206.22  | 199.95  | 213.17  | 252.12  | 246.06  |
| Orthopedics                   | 88.32   | 106.23  | 94.12   | 83.97   | 88.05   | 87.9    | 96.42   | 82.36   | 87.83   | 108.73  |
| Otolaryngology                | 268.30  | 359.98  | 305.44  | 392.08  | 420.92  | 397.90  | 455.84  | 453.01  | 438.15  | 494.20  |
| Pathology                     | 2186.81 | 2035.57 | 1914.38 | 1993.36 | 1842.40 | 1841.23 | 1952.68 | 1936.68 | 1803.78 | 1596.10 |
| Pediatrics                    | 440.82  | 429.56  | 402.71  | 380.54  | 425.45  | 423.31  | 375.23  | 407.32  | 413.19  | 425.38  |
| Physical Medicine & Rehab     | 168.31  | 122.68  | 122.6   | 93.41   | 102.48  | 108.48  | 113.81  | 134.73  | 129.29  | 164.28  |
| Plastic Surgery               | 0       | 0       | 0       | 0       | 0       | 0       | 0       | 0       | 0       | 0       |
| Psychiatry                    | 523.79  | 546.74  | 544.91  | 509.45  | 480.55  | 534.91  | 553.12  | 559.63  | 585.23  | 672.18  |
| Radiation-Diagnostic/Oncology | 171.95  | 116.67  | 123.22  | 127.95  | 141.77  | 183.69  | 150.70  | 192.13  | 188.18  | 160.75  |
| Surgery                       | 479.19  | 476.61  | 446.78  | 428.48  | 415.80  | 490.17  | 527.02  | 632.8   | 698.7   | 643.1   |
| Urology                       | 110.36  | 124.87  | 117.82  | 119.16  | 66.07   | 91.89   | 62.83   | 33.26   | 96.93   | 113.31  |

Inflation-Adjusted Dollar amount for each NIH training grant (F32, T32) spent per active physician from 2011-2020 by specialty

| F32                           | 2011   | 2012   | 2013   | 2014   | 2015   | 2016   | 2017   | 2018   | 2019   | 2020   |
|-------------------------------|--------|--------|--------|--------|--------|--------|--------|--------|--------|--------|
| Anesthesiology                | 4.78   | 7.50   | 9.39   | 7.02   | 0.53   | 1.30   | 3.74   | 6.10   | 2.52   | 7.96   |
| Dermatology                   | 16.02  | 19.75  | 13.20  | 7.03   | 11.90  | 13.02  | 17.48  | 16.88  | 4.61   | 13.61  |
| Emergency Medicine            | 1.74   | 1.49   | 1.61   | 0.00   | 0.00   | 0.00   | 0.00   | 0.00   | 0.00   | 1.24   |
| Family Medicine               | 0.00   | 0.00   | 0.00   | 0.48   | 0.17   | 0.00   | 0.00   | 0.00   | 0.00   | 0.00   |
| Internal Medicine/Medicine    | 60.00  | 51.78  | 50.80  | 46.58  | 47.82  | 51.85  | 49.18  | 48.63  | 48.48  | 55.24  |
| Neurology                     | 56.70  | 33.79  | 71.09  | 109.69 | 101.77 | 88.73  | 82.01  | 8.98   | 97.82  | 84.93  |
| Neurosurgery                  | 83.50  | 70.23  | 63.10  | 74.28  | 87.92  | 91.85  | 87.19  | 126.63 | 67.25  | 108.94 |
| Obstetrics and Gynecology     | 5.19   | 7.02   | 4.14   | 4.95   | 6.22   | 5.11   | 3.20   | 7.51   | 6.34   | 6.14   |
| Ophthalmology                 | 10.05  | 19.00  | 20.27  | 25.16  | 32.40  | 19.73  | 20.84  | 19.60  | 24.08  | 25.32  |
| Orthopedics                   | 12.45  | 14.46  | 12.55  | 11.36  | 15.70  | 14.04  | 15.90  | 20.07  | 20.45  | 21.30  |
| Otolaryngology                | 57.13  | 40.65  | 36.71  | 51.36  | 29.52  | 45.32  | 56.92  | 50.02  | 44.64  | 38.30  |
| Pathology                     | 76.21  | 59.23  | 67.18  | 71.69  | 85.00  | 97.18  | 63.34  | 73.53  | 67.69  | 49.49  |
| Pediatrics                    | 24.12  | 24.87  | 21.36  | 20.43  | 14.10  | 12.38  | 11.49  | 11.41  | 16.69  | 9.49   |
| Physical Medicine & Rehab     | 6.04   | 5.84   | 0.00   | 5.87   | 4.16   | 6.91   | 18.37  | 22.93  | 17.63  | 12.08  |
| Plastic Surgery               | 0.00   | 0.00   | 0.00   | 0.00   | 0.00   | 0.00   | 0.00   | 0.00   | 8.42   | 0.00   |
| Psychiatry                    | 50.17  | 36.16  | 34.08  | 31.64  | 35.29  | 38.12  | 28.10  | 32.06  | 38.27  | 44.93  |
| Radiation-Diagnostic/Oncology | 21.82  | 11.18  | 4.73   | 1.36   | 2.70   | 11.30  | 8.76   | 9.41   | 5.70   | 9.52   |
| Surgery                       | 31.58  | 28.98  | 25.34  | 36.86  | 42.57  | 37.90  | 34.27  | 45.24  | 34.45  | 36.79  |
| Urology                       | 11.85  | 10.64  | 10.98  | 21.50  | 11.51  | 14.64  | 10.86  | 6.56   | 5.62   | 6.79   |
| T32                           | 2011   | 2012   | 2013   | 2014   | 2015   | 2016   | 2017   | 2018   | 2019   | 2020   |
| Anesthesiology                | 57.45  | 64.14  | 64.57  | 75.08  | 108.87 | 110.88 | 117.27 | 106.81 | 105.07 | 91.71  |
| Dermatology                   | 207.61 | 216.57 | 192.02 | 150.87 | 188.49 | 184.11 | 171.50 | 158.05 | 136.59 | 140.20 |
| Emergency Medicine            | 0.00   | 0.00   | 0.00   | 0.00   | 0.00   | 3.82   | 15.91  | 18.19  | 17.71  | 13.94  |



|                               |         |         |         |         |         |         |         |         |         |         |
|-------------------------------|---------|---------|---------|---------|---------|---------|---------|---------|---------|---------|
| Family Medicine               | 11.59   | 10.68   | 13.53   | 12.77   | 12.66   | 10.97   | 17.63   | 13.37   | 10.88   | 12.76   |
| Internal Medicine/Medicine    | 1054.73 | 1034.69 | 97.00   | 936.72  | 945.50  | 968.14  | 946.97  | 1002.63 | 978.12  | 999.11  |
| Neurology                     | 738.92  | 637.44  | 609.48  | 714.85  | 629.20  | 681.69  | 717.76  | 720.92  | 561.45  | 702.30  |
| Neurosurgery                  | 117.21  | 102.16  | 108.51  | 107.92  | 304.27  | 310.40  | 270.88  | 359.03  | 557.96  | 601.52  |
| Obstetrics and Gynecology     | 59.25   | 57.63   | 59.66   | 60.28   | 60.55   | 54.50   | 47.12   | 35.16   | 36.03   | 57.79   |
| Ophthalmology                 | 160.46  | 171.97  | 233.63  | 225.03  | 201.49  | 191.30  | 182.24  | 189.87  | 220.25  | 212.14  |
| Orthopedics                   | 88.32   | 104.32  | 90.76   | 79.44   | 82.36   | 81.54   | 87.88   | 73.36   | 76.73   | 93.74   |
| Otolaryngology                | 268.30  | 353.51  | 294.55  | 370.92  | 393.71  | 369.12  | 415.47  | 403.49  | 382.76  | 426.07  |
| Pathology                     | 2186.81 | 1998.99 | 1846.12 | 1885.80 | 1723.29 | 1708.06 | 1779.74 | 1724.96 | 1575.75 | 1376.06 |
| Pediatrics                    | 440.82  | 421.84  | 388.35  | 360.01  | 397.94  | 392.69  | 342.00  | 362.79  | 360.96  | 366.74  |
| Physical Medicine & Rehab     | 168.31  | 120.48  | 118.23  | 88.37   | 95.85   | 100.63  | 103.73  | 120.00  | 112.95  | 141.63  |
| Plastic Surgery               | 0.00    | 0.00    | 0.00    | 0.00    | 0.00    | 0.00    | 0.00    | 0.00    | 0.00    | 0.00    |
| Psychiatry                    | 523.79  | 536.91  | 525.48  | 481.96  | 449.48  | 496.22  | 504.13  | 498.45  | 511.25  | 579.51  |
| Radiation-Diagnostic/Oncology | 171.95  | 114.57  | 118.83  | 121.05  | 132.60  | 170.40  | 137.35  | 171.13  | 164.39  | 138.59  |
| Surgery                       | 479.19  | 468.04  | 430.85  | 405.36  | 388.92  | 454.72  | 480.35  | 563.62  | 610.37  | 554.44  |
| Urology                       | 110.36  | 122.63  | 113.62  | 112.73  | 61.80   | 85.24   | 57.27   | 29.62   | 84.68   | 97.69   |

Supplementary Table 11: Dollar amount for each NIH career development grant (K01, K08, K23) spent per active physician from 2011-2020 by specialty

|                               | 2011   | 2012   | 2013   | 2014   | 2015   | 2016   | 2017   | 2018   | 2019   | 2020   |
|-------------------------------|--------|--------|--------|--------|--------|--------|--------|--------|--------|--------|
| <b>K01</b>                    |        |        |        |        |        |        |        |        |        |        |
| Anesthesiology                | 11.97  | 11.98  | 11.36  | 14.94  | 21.38  | 21.37  | 24.69  | 28.77  | 15.50  | 23.43  |
| Dermatology                   | 34.67  | 42.10  | 52.45  | 38.57  | 55.29  | 65.58  | 106.25 | 109.18 | 82.28  | 75.10  |
| Emergency Medicine            | 0      | 3.83   | 3.60   | 3.44   | 6.97   | 0      | 0      | 0.93   | 2.73   | 5.47   |
| Family Medicine               | 11.65  | 14.49  | 10.85  | 8.14   | 8.35   | 9.53   | 9.57   | 11.03  | 9.88   | 17.62  |
| Internal Medicine/Medicine    | 152.01 | 139.88 | 140.59 | 166.31 | 180.19 | 165.29 | 168.51 | 186.80 | 202.76 | 206.13 |
| Neurology                     | 125.34 | 139.07 | 175.80 | 192.43 | 186.72 | 207.22 | 199.33 | 189.16 | 210.88 | 165.72 |
| Neurosurgery                  | 59.06  | 47.18  | 24.49  | 0      | 0      | 19.26  | 0      | 56.31  | 78.98  | 57.08  |
| Obstetrics and Gynecology     | 6.92   | 4.21   | 7.66   | 15.55  | 18.77  | 17.85  | 22.88  | 18.27  | 23.96  | 26.07  |
| Ophthalmology                 | 0      | 0      | 0      | 7.10   | 0      | 0      | 7.72   | 13.28  | 13.46  | 7.52   |
| Orthopedics                   | 31.17  | 24.07  | 41.73  | 44.16  | 57.72  | 46.4   | 39.47  | 32.31  | 36.72  | 30.81  |
| Otolaryngology                | 29.72  | 29.58  | 29.44  | 27.75  | 0      | 0      | 0      | 0      | 0      | 13.27  |
| Pathology                     | 102.72 | 114.00 | 123.82 | 111.14 | 113.43 | 153.99 | 164.00 | 185.13 | 163.88 | 218.65 |
| Pediatrics                    | 44.76  | 38.30  | 40.61  | 43.32  | 37.79  | 53.22  | 54.02  | 51.33  | 56.95  | 59.26  |
| Physical Medicine & Rehab     | 40.44  | 41.98  | 54.95  | 81.08  | 94.27  | 107.23 | 180.41 | 174.18 | 136.74 | 154.63 |
| Plastic Surgery               | 0      | 0      | 0      | 0      | 0      | 0      | 0      | 0      | 0      | 0      |
| Psychiatry                    | 314.48 | 321.51 | 296.05 | 304.76 | 284.39 | 268.10 | 274.19 | 264.67 | 286.16 | 314.98 |
| Radiation-Diagnostic/Oncology | 64.43  | 55.86  | 40.20  | 41.23  | 44.27  | 49.16  | 67.88  | 60.06  | 46.75  | 36.61  |
| Surgery                       | 37.96  | 33.43  | 49.24  | 35.12  | 53.59  | 68.22  | 83.1   | 62.83  | 53.73  | 39.57  |
| Urology                       | 10.77  | 10.80  | 10.83  | 14.04  | 44.88  | 60.18  | 85.28  | 69.62  | 68.52  | 85.16  |
| <b>K08</b>                    |        |        |        |        |        |        |        |        |        |        |
| Anesthesiology                | 40.78  | 45.27  | 50.82  | 55.42  | 51.27  | 49.53  | 63.75  | 90.26  | 106.84 | 94.17  |
| Dermatology                   | 205.68 | 208.13 | 170.54 | 150.23 | 153.90 | 162.85 | 162.50 | 146.67 | 161.06 | 130.13 |
| Emergency Medicine            | 8.33   | 15.95  | 23.50  | 15.43  | 18.84  | 26.64  | 26.82  | 29.34  | 24.63  | 24.8   |
| Family Medicine               | 5.73   | 5.72   | 6.22   | 2.50   | 1.33   | 1.30   | 1.48   | 1.45   | 4.35   | 4.26   |
| Internal Medicine/Medicine    | 344.14 | 330.28 | 299.67 | 304.18 | 280.67 | 323.79 | 324.02 | 352.97 | 387.86 | 392.13 |
| Neurology                     | 490.32 | 443.51 | 500.72 | 436.15 | 433.34 | 399.55 | 414.33 | 408.50 | 461.26 | 522.45 |
| Neurosurgery                  | 229.79 | 234.21 | 279.63 | 219.26 | 310.07 | 343.34 | 401.77 | 356.15 | 412.35 | 314.03 |
| Obstetrics and Gynecology     | 26.56  | 26.52  | 23.33  | 14.54  | 5.88   | 8.99   | 8.01   | 21.51  | 25.98  | 39.2   |
| Ophthalmology                 | 273.33 | 279.28 | 291.34 | 334.57 | 328.66 | 290.54 | 292.39 | 276.97 | 261.70 | 252.56 |
| Orthopedics                   | 9.04   | 13.71  | 26.79  | 22.73  | 25.33  | 45.65  | 63.2   | 54.19  | 44.41  | 51.9   |
| Otolaryngology                | 216.07 | 235.99 | 227.68 | 195.77 | 240.71 | 218.56 | 176.78 | 200.32 | 221.60 | 192.27 |
| Pathology                     | 324.60 | 298.86 | 333.48 | 359.99 | 343.54 | 300.77 | 296.19 | 367.42 | 373.30 | 413.28 |
| Pediatrics                    | 270.48 | 236.56 | 230.35 | 217.43 | 202.81 | 231.42 | 293.33 | 328.39 | 319.98 | 309.69 |
| Physical Medicine & Rehab     | 14.69  | 14.35  | 14.03  | 0      | 0      | 0      | 0      | 17.91  | 17.51  | 17.58  |
| Plastic Surgery               | 0      | 0      | 0      | 0      | 0      | 0      | 0      | 0      | 0      | 0      |
| Psychiatry                    | 148.44 | 132.90 | 88.13  | 119.99 | 98.17  | 102.58 | 111.62 | 96.05  | 83.94  | 109.84 |
| Radiation-Diagnostic/Oncology | 25.01  | 23.36  | 21.72  | 23.96  | 21.53  | 4.38   | 13.36  | 15.04  | 69.92  | 90.98  |
| Surgery                       | 300.38 | 312.41 | 264.84 | 260.59 | 214.63 | 243.63 | 253.30 | 289.80 | 299.40 | 325.49 |
| Urology                       | 123.84 | 122.20 | 142.34 | 108.32 | 67.48  | 83.58  | 85.01  | 82.5   | 108.92 | 107.64 |
| <b>K23</b>                    |        |        |        |        |        |        |        |        |        |        |
| Anesthesiology                | 29.91  | 38.53  | 45.12  | 49.58  | 44.81  | 37.01  | 53.81  | 51.26  | 72.70  | 70.44  |
| Dermatology                   | 33.98  | 44.24  | 22.18  | 10.66  | 21.97  | 56.29  | 57.57  | 111.06 | 124.41 | 107.01 |
| Emergency Medicine            | 68.98  | 59.28  | 62.06  | 56.18  | 55.92  | 75.99  | 88.16  | 76.13  | 79.18  | 57.31  |
| Family Medicine               | 13.02  | 11.66  | 8.27   | 3.99   | 5.82   | 5.20   | 7.11   | 6.91   | 8.33   | 9.31   |
| Internal Medicine/Medicine    | 407.03 | 419.60 | 411.26 | 391.56 | 355.75 | 377.87 | 374.26 | 374.05 | 374.07 | 418.03 |
| Neurology                     | 696.50 | 687.37 | 591.24 | 631.47 | 644.54 | 518.67 | 638.91 | 670.83 | 728.21 | 744.63 |
| Neurosurgery                  | 73.70  | 139.35 | 178.37 | 132.14 | 157.06 | 133.72 | 132.76 | 130.34 | 161.29 | 195.31 |
| Obstetrics and Gynecology     | 39.68  | 44.49  | 33.98  | 41.18  | 27.96  | 15.59  | 27.45  | 32.06  | 40.59  | 47.61  |
| Ophthalmology                 | 159.02 | 129.45 | 144.34 | 121.28 | 144.82 | 217.56 | 242.46 | 212.90 | 233.70 | 219.24 |
| Orthopedics                   | 17.02  | 19.94  | 16.53  | 16.51  | 10.16  | 18.17  | 9.12   | 19.40  | 25.89  | 28.72  |
| Otolaryngology                | 160.86 | 134.92 | 132.49 | 203.04 | 276.16 | 226.42 | 255.43 | 251.86 | 234.92 | 186.50 |
| Pathology                     | 34.49  | 27.91  | 19.31  | 30.02  | 20.86  | 10.49  | 11.37  | 11.18  | 15.03  | 41.74  |
| Pediatrics                    | 233.29 | 228.02 | 218.64 | 212.86 | 190.71 | 176.80 | 254.69 | 275.13 | 310.56 | 367.60 |
| Physical Medicine & Rehab     | 116.92 | 108.31 | 169.68 | 181.33 | 142.39 | 133.04 | 106.19 | 28.27  | 46.51  | 45.29  |
| Plastic Surgery               | 0      | 0      | 0      | 0      | 0      | 0      | 0      | 0      | 0      | 0      |
| Psychiatry                    | 498.00 | 481.66 | 451.55 | 429.56 | 414.64 | 403.43 | 473.34 | 465.21 | 498.79 | 506.35 |
| Radiation-Diagnostic/Oncology | 29.33  | 18.78  | 16.73  | 17.03  | 16.74  | 17.70  | 18.13  | 8.86   | 4.74   | 13.99  |
| Surgery                       | 64.76  | 64.88  | 58.74  | 62.32  | 58.19  | 77.12  | 64.29  | 57.90  | 60.88  | 87.85  |
| Urology                       | 31.99  | 15.71  | 30.39  | 47.54  | 30.71  | 44.21  | 31.45  | 14.34  | 49.54  | 49.35  |

Inflation-Adjusted Dollar amount for each NIH career development grant (K01, K08, K23) spent per active physician from 2011-2020 by specialty

| K01                           | 2011   | 2012   | 2013   | 2014   | 2015   | 2016   | 2017   | 2018   | 2019   | 2020   |
|-------------------------------|--------|--------|--------|--------|--------|--------|--------|--------|--------|--------|
| Anesthesiology                | 11.97  | 11.76  | 10.95  | 14.13  | 20.00  | 19.82  | 22.50  | 25.62  | 13.54  | 20.20  |
| Dermatology                   | 34.67  | 41.34  | 50.58  | 36.49  | 51.72  | 60.84  | 96.84  | 97.24  | 71.88  | 64.75  |
| Emergency Medicine            | 0      | 3.76   | 3.47   | 3.25   | 6.52   | 0.00   | 0.00   | 0.83   | 2.38   | 4.72   |
| Family Medicine               | 11.65  | 14.23  | 10.46  | 7.70   | 7.81   | 8.84   | 8.72   | 9.82   | 8.63   | 15.19  |
| Internal Medicine/Medicine    | 152.01 | 137.37 | 135.58 | 157.34 | 168.54 | 153.34 | 153.59 | 166.38 | 177.13 | 177.71 |
| Neurology                     | 125.34 | 136.57 | 169.53 | 182.05 | 174.65 | 192.23 | 181.68 | 168.48 | 184.22 | 142.87 |
| Neurosurgery                  | 59.06  | 46.33  | 23.62  | 0.00   | 0.00   | 17.87  | 0.00   | 50.15  | 69.00  | 49.21  |
| Obstetrics and Gynecology     | 6.92   | 4.13   | 7.39   | 14.71  | 17.56  | 16.56  | 20.85  | 16.27  | 20.93  | 22.48  |
| Ophthalmology                 | 0      | 0.00   | 0.00   | 6.72   | 0.00   | 0.00   | 7.04   | 11.83  | 11.76  | 6.48   |
| Orthopedics                   | 31.17  | 23.64  | 40.24  | 41.78  | 53.99  | 43.04  | 35.97  | 28.78  | 32.08  | 26.56  |
| Otolaryngology                | 29.72  | 29.05  | 28.39  | 26.25  | 0.00   | 0.00   | 0.00   | 0.00   | 0.00   | 11.44  |
| Pathology                     | 102.72 | 111.95 | 119.41 | 105.14 | 106.10 | 142.85 | 149.48 | 164.89 | 143.16 | 188.51 |
| Pediatrics                    | 44.76  | 37.61  | 39.16  | 40.98  | 35.35  | 49.37  | 49.24  | 45.72  | 49.75  | 51.09  |
| Physical Medicine & Rehab     | 40.44  | 41.23  | 52.99  | 76.71  | 88.18  | 99.47  | 164.43 | 155.14 | 119.45 | 133.31 |
| Plastic Surgery               | 0      | 0.00   | 0.00   | 0.00   | 0.00   | 0.00   | 0.00   | 0.00   | 0.00   | 0.00   |
| Psychiatry                    | 314.48 | 315.73 | 285.49 | 288.32 | 266.00 | 248.71 | 249.91 | 235.74 | 249.99 | 271.56 |
| Radiation-Diagnostic/Oncology | 64.43  | 54.86  | 38.77  | 39.01  | 41.41  | 45.60  | 61.87  | 53.49  | 40.84  | 31.56  |
| Surgery                       | 37.96  | 32.83  | 47.48  | 33.22  | 50.13  | 63.29  | 75.74  | 55.96  | 46.94  | 34.11  |
| Urology                       | 10.77  | 10.61  | 10.44  | 13.28  | 41.98  | 55.83  | 77.73  | 62.01  | 59.86  | 73.42  |

| K08                           | 2011   | 2012   | 2013   | 2014   | 2015   | 2016   | 2017   | 2018   | 2019   | 2020   |
|-------------------------------|--------|--------|--------|--------|--------|--------|--------|--------|--------|--------|
| Anesthesiology                | 40.78  | 44.46  | 49.01  | 52.43  | 47.96  | 45.95  | 58.10  | 80.39  | 93.33  | 81.19  |
| Dermatology                   | 205.68 | 204.39 | 164.46 | 142.12 | 143.95 | 151.07 | 148.11 | 130.64 | 140.70 | 112.19 |
| Emergency Medicine            | 8.33   | 15.66  | 22.66  | 14.60  | 17.62  | 24.71  | 24.44  | 26.13  | 21.52  | 21.38  |
| Family Medicine               | 5.73   | 5.62   | 6.00   | 2.37   | 1.24   | 1.21   | 1.35   | 1.29   | 3.80   | 3.67   |
| Internal Medicine/Medicine    | 344.14 | 324.34 | 288.99 | 287.77 | 262.52 | 300.37 | 295.32 | 314.38 | 338.83 | 338.07 |
| Neurology                     | 490.32 | 435.54 | 482.87 | 412.62 | 405.32 | 370.65 | 377.64 | 363.84 | 402.95 | 450.43 |
| Neurosurgery                  | 229.79 | 230.00 | 269.66 | 207.43 | 290.02 | 318.51 | 366.19 | 317.22 | 360.22 | 270.74 |
| Obstetrics and Gynecology     | 26.56  | 26.04  | 22.50  | 13.76  | 5.50   | 8.34   | 7.30   | 19.16  | 22.70  | 33.80  |
| Ophthalmology                 | 273.33 | 274.26 | 280.95 | 316.52 | 307.41 | 269.53 | 266.50 | 246.69 | 228.62 | 217.74 |
| Orthopedics                   | 9.04   | 13.46  | 25.83  | 21.50  | 23.69  | 42.35  | 57.60  | 48.27  | 38.80  | 44.75  |
| Otolaryngology                | 216.07 | 231.75 | 219.56 | 185.21 | 225.15 | 202.75 | 161.12 | 178.42 | 193.59 | 165.76 |
| Pathology                     | 324.6  | 293.49 | 321.59 | 340.57 | 321.33 | 279.02 | 269.96 | 327.25 | 326.11 | 356.31 |
| Pediatrics                    | 270.48 | 232.31 | 222.14 | 205.70 | 189.70 | 214.68 | 267.35 | 292.49 | 279.53 | 267.00 |
| Physical Medicine & Rehab     | 14.69  | 14.09  | 13.53  | 0.00   | 0.00   | 0.00   | 0.00   | 15.95  | 15.30  | 15.16  |
| Plastic Surgery               | 0      | 0.00   | 0.00   | 0.00   | 0.00   | 0.00   | 0.00   | 0.00   | 0.00   | 0.00   |
| Psychiatry                    | 148.44 | 130.51 | 84.99  | 113.52 | 91.82  | 95.16  | 101.73 | 85.55  | 73.33  | 94.70  |
| Radiation-Diagnostic/Oncology | 25.01  | 22.94  | 20.95  | 22.67  | 20.14  | 4.06   | 12.18  | 13.40  | 61.08  | 78.44  |
| Surgery                       | 300.38 | 306.80 | 255.40 | 246.53 | 200.75 | 226.01 | 230.87 | 258.12 | 261.55 | 280.62 |
| Urology                       | 123.84 | 120.00 | 137.26 | 102.48 | 63.12  | 77.54  | 77.48  | 73.48  | 95.15  | 92.80  |

| K23                           | 2011   | 2012   | 2013   | 2014   | 2015   | 2016   | 2017   | 2018   | 2019   | 2020   |
|-------------------------------|--------|--------|--------|--------|--------|--------|--------|--------|--------|--------|
| Anesthesiology                | 29.91  | 37.84  | 43.51  | 46.90  | 41.91  | 34.33  | 49.04  | 45.66  | 63.51  | 60.73  |
| Dermatology                   | 33.98  | 43.44  | 21.39  | 10.08  | 20.55  | 52.22  | 52.47  | 98.92  | 108.68 | 92.26  |
| Emergency Medicine            | 68.98  | 58.21  | 59.85  | 53.15  | 52.30  | 70.49  | 80.35  | 67.81  | 69.17  | 49.41  |
| Family Medicine               | 13.02  | 11.45  | 7.98   | 3.77   | 5.44   | 4.82   | 6.48   | 6.15   | 7.28   | 8.03   |
| Internal Medicine/Medicine    | 407.03 | 412.06 | 396.60 | 370.43 | 332.75 | 350.54 | 341.11 | 333.16 | 326.78 | 360.40 |
| Neurology                     | 696.5  | 675.02 | 570.16 | 597.40 | 602.87 | 481.16 | 582.33 | 597.49 | 636.15 | 641.98 |
| Neurosurgery                  | 73.7   | 136.85 | 172.01 | 125.01 | 146.91 | 124.05 | 121.00 | 116.09 | 140.90 | 168.38 |
| Obstetrics and Gynecology     | 39.68  | 43.69  | 32.77  | 38.96  | 26.15  | 14.46  | 25.02  | 28.56  | 35.46  | 41.05  |
| Ophthalmology                 | 159.02 | 127.12 | 139.19 | 114.74 | 135.46 | 201.82 | 220.99 | 189.63 | 204.16 | 189.02 |
| Orthopedics                   | 17.02  | 19.58  | 15.94  | 15.62  | 9.50   | 16.86  | 8.31   | 17.28  | 22.62  | 24.76  |
| Otolaryngology                | 160.86 | 132.50 | 127.77 | 192.08 | 258.31 | 210.04 | 232.81 | 224.33 | 205.22 | 160.79 |
| Pathology                     | 34.49  | 27.41  | 18.62  | 28.40  | 19.51  | 9.73   | 10.36  | 9.96   | 13.13  | 35.99  |
| Pediatrics                    | 233.29 | 223.92 | 210.84 | 201.37 | 178.38 | 164.01 | 232.13 | 245.05 | 271.30 | 316.92 |
| Physical Medicine & Rehab     | 116.92 | 106.36 | 163.63 | 171.55 | 133.18 | 123.42 | 96.79  | 25.18  | 40.63  | 39.05  |
| Plastic Surgery               | 0      | 0.00   | 0.00   | 0.00   | 0.00   | 0.00   | 0.00   | 0.00   | 0.00   | 0.00   |
| Psychiatry                    | 498    | 473.00 | 435.45 | 406.38 | 387.83 | 374.25 | 431.42 | 414.35 | 435.74 | 436.55 |
| Radiation-Diagnostic/Oncology | 29.33  | 18.44  | 16.13  | 16.11  | 15.66  | 16.42  | 16.52  | 7.89   | 4.14   | 12.06  |
| Surgery                       | 64.76  | 63.71  | 56.65  | 58.96  | 54.43  | 71.54  | 58.60  | 51.57  | 53.18  | 75.74  |
| Urology                       | 31.99  | 15.43  | 29.31  | 44.97  | 28.72  | 41.01  | 28.66  | 12.77  | 43.28  | 42.55  |

Supplementary Table 12: Dollar amount for each NIH advanced career grant (R01, R03, R21, P30, U01) spent per active physician from 2011-2020 by specialty

| R01                           | 2011     | 2012     | 2013     | 2014     | 2015     | 2016     | 2017     | 2018     | 2019     | 2020     |
|-------------------------------|----------|----------|----------|----------|----------|----------|----------|----------|----------|----------|
| Anesthesiology                | 1857.17  | 2085.47  | 2002.89  | 2147.10  | 2039.57  | 2065.00  | 2117.78  | 2506.67  | 2616.49  | 2857.83  |
| Dermatology                   | 3680.31  | 3956.23  | 3656.59  | 3414.25  | 3400.26  | 3538.3   | 3308.52  | 3959.33  | 4035.89  | 3969.33  |
| Emergency Medicine            | 356.59   | 362.32   | 370.61   | 404.05   | 420.12   | 452.30   | 504.30   | 552.70   | 687.19   | 898.84   |
| Family Medicine               | 352.34   | 385.20   | 339.17   | 306.29   | 350.25   | 344.39   | 342.24   | 389.01   | 389.17   | 444.97   |
| Internal Medicine/Medicine    | 11841.01 | 11375.60 | 10358.28 | 10522.61 | 10445.97 | 11232.57 | 12068.33 | 12884.91 | 13695.55 | 14925.08 |
| Neurology                     | 16516.17 | 17029.48 | 16227.40 | 16367.29 | 16396.56 | 18126.12 | 20592.56 | 24183.35 | 24585.73 | 29452.72 |
| Neurosurgery                  | 9547.89  | 9969.06  | 9068.75  | 9058.58  | 11454.43 | 11991.81 | 12558.93 | 13670.75 | 14873.42 | 17044.80 |
| Obstetrics and Gynecology     | 1242.54  | 1158.34  | 1173.61  | 1166.74  | 1256.97  | 1534.18  | 1811.10  | 1874.12  | 2278.34  | 2698.02  |
| Ophthalmology                 | 8000.73  | 8093.83  | 7832.38  | 8461.44  | 7953.54  | 7903.77  | 8352.17  | 8895.57  | 9648.68  | 10296.89 |
| Orthopedics                   | 1898.66  | 2080.26  | 2274.09  | 2308.81  | 2198.59  | 2471.33  | 2734.49  | 2915.80  | 3189.91  | 3678.49  |
| Otolaryngology                | 5631.72  | 6016.96  | 6041.57  | 6207.68  | 6739.23  | 6722.77  | 7091.05  | 8145.93  | 9384.18  | 9321.23  |
| Pathology                     | 21647.85 | 22199.46 | 21486.80 | 20697.31 | 21660.82 | 22643.09 | 23192.63 | 26175.89 | 28488.09 | 30626.48 |
| Pediatrics                    | 5629.26  | 6015.39  | 5538.10  | 5682.43  | 5457.86  | 5382.00  | 5122.00  | 5473.96  | 5685.77  | 6498.71  |
| Physical Medicine & Rehab     | 1322.77  | 1502.20  | 1482.51  | 1669.98  | 1491.60  | 1895.05  | 2514.18  | 2830.94  | 2912.92  | 3148.88  |
| Plastic Surgery               | 141.77   | 0        | 77.41    | 43.23    | 0        | 0        | 46.66    | 0        | 38.79    | 0        |
| Psychiatry                    | 12281.68 | 12154.31 | 10887.32 | 11196.29 | 10620.6  | 11368.05 | 11898.19 | 12833.89 | 13164.48 | 14072.72 |
| Radiation-Diagnostic/Oncology | 6337.90  | 5937.65  | 5370.79  | 5271.53  | 5476.99  | 5891.45  | 6445.64  | 7240.69  | 7391.27  | 7553.73  |
| Surgery                       | 5574.43  | 5444.49  | 5059.00  | 5335.00  | 5655.51  | 5773.19  | 6506.34  | 6985.99  | 7916.08  | 8974.18  |
| Urology                       | 2443.77  | 2561.83  | 2560.75  | 2374.32  | 2212.76  | 2088.62  | 2342.54  | 2400.19  | 2465.14  | 2774.51  |

|                               | 2011    | 2012    | 2013    | 2014    | 2015    | 2016    | 2017    | 2018    | 2019    | 2020    |
|-------------------------------|---------|---------|---------|---------|---------|---------|---------|---------|---------|---------|
| <b>R03</b>                    |         |         |         |         |         |         |         |         |         |         |
| Anesthesiology                | 11.22   | 17.83   | 10.87   | 12.98   | 7.8     | 7.42    | 9.26    | 18.18   | 18.74   | 14.85   |
| Dermatology                   | 30.12   | 37.51   | 13.3    | 27.58   | 53.81   | 59.32   | 44.46   | 25.26   | 31.16   | 41.18   |
| Emergency Medicine            | 1.88    | 2.42    | 1.84    | 2.97    | 10.49   | 10.14   | 10.66   | 8.02    | 4.31    | 7.64    |
| Family Medicine               | 6.92    | 6.68    | 7.76    | 4.61    | 3.86    | 3.63    | 1.37    | 1.55    | 4.67    | 3.49    |
| Internal Medicine/Medicine    | 87.07   | 105.03  | 96.35   | 95.53   | 84.97   | 68.87   | 67.87   | 72.65   | 94.98   | 108.40  |
| Neurology                     | 74.68   | 50.39   | 65.06   | 79.21   | 93.9    | 124.56  | 100.69  | 85.09   | 108.58  | 103.35  |
| Neurosurgery                  | 77.53   | 152.81  | 148.5   | 73.58   | 111.07  | 65.76   | 29.25   | 28.56   | 27.88   | 98.37   |
| Obstetrics and Gynecology     | 14.88   | 21.29   | 18.72   | 19.53   | 18      | 24.15   | 31.96   | 32.95   | 26.32   | 17.9    |
| Ophthalmology                 | 0       | 0       | 0       | 10.6    | 14.59   | 4.33    | 6.26    | 10.18   | 16.7    | 17.09   |
| Orthopedics                   | 41.2    | 40.18   | 45.26   | 61.78   | 42.73   | 26.23   | 12.2    | 18.89   | 38.76   | 33.19   |
| Otolaryngology                | 186.14  | 244.97  | 255.34  | 210.19  | 200.4   | 177.92  | 188.66  | 135.84  | 32.77   | 48.56   |
| Pathology                     | 128.58  | 110.6   | 104.87  | 107.55  | 93.42   | 56.38   | 80.5    | 141.23  | 192.16  | 215.25  |
| Pediatrics                    | 52.63   | 43.19   | 47.98   | 45.78   | 52.52   | 69.15   | 53.11   | 64.05   | 53.04   | 61.13   |
| Physical Medicine & Rehab     | 79.07   | 62.53   | 51.81   | 66.44   | 45.03   | 42.72   | 18.44   | 51.4    | 85.91   | 74.33   |
| Plastic Surgery               | 0       | 0       | 0       | 0       | 0       | 10.87   | 10.87   | 0       | 0       | 0       |
| Psychiatry                    | 69.28   | 71.75   | 70.99   | 63.54   | 56.18   | 59.22   | 69.09   | 54.96   | 48.6    | 46.38   |
| Radiation-Diagnostic/Oncology | 24.15   | 14.76   | 19.67   | 36.08   | 39.98   | 18.51   | 23.3    | 38.92   | 53.93   | 51.51   |
| Surgery                       | 51.84   | 67.53   | 54.7    | 62.02   | 59.58   | 47.39   | 84.47   | 71.23   | 40.06   | 63.83   |
| Urology                       | 7.94    | 24.56   | 15.71   | 36.33   | 48.04   | 30.4    | 8.16    | 8.42    | 27.96   | 37.5    |
| <b>R21</b>                    |         |         |         |         |         |         |         |         |         |         |
| Anesthesiology                | 133.66  | 122.64  | 137.74  | 122.96  | 145.51  | 144.65  | 127.03  | 181.07  | 213.97  | 171.79  |
| Dermatology                   | 321.61  | 349.67  | 326.15  | 423.16  | 315.57  | 243     | 257.3   | 261.64  | 253.41  | 343.96  |
| Emergency Medicine            | 41.72   | 34.77   | 18.18   | 29.54   | 26.80   | 20.98   | 24.94   | 39.04   | 35.41   | 27.11   |
| Family Medicine               | 25.67   | 30.99   | 32.31   | 35.53   | 41.98   | 35.97   | 21.46   | 21.25   | 23.26   | 27.66   |
| Internal Medicine/Medicine    | 710.85  | 746.96  | 688.77  | 658.07  | 651.08  | 693.86  | 662.56  | 649.85  | 644.45  | 706.58  |
| Neurology                     | 999.05  | 1205.96 | 1116.44 | 1120.83 | 1135.85 | 1248.89 | 1273.00 | 1398.18 | 1824.26 | 1424.04 |
| Neurosurgery                  | 478.39  | 728.36  | 857.71  | 918.7   | 1363.36 | 1450.45 | 1033.97 | 987.89  | 2043.24 | 1760.36 |
| Obstetrics and Gynecology     | 168.40  | 129.99  | 140.44  | 118.83  | 126.50  | 113.79  | 106.80  | 136.27  | 146.98  | 231.77  |
| Ophthalmology                 | 216.49  | 212.90  | 320.06  | 305.76  | 431.98  | 356.16  | 262.60  | 341.72  | 594.16  | 580.71  |
| Orthopedics                   | 139.37  | 184.67  | 175.17  | 139.49  | 150.32  | 152.86  | 271.04  | 371.61  | 253.68  | 268.12  |
| Otolaryngology                | 289.56  | 349.50  | 494.81  | 540.28  | 476.43  | 309.99  | 312.12  | 542.15  | 572.56  | 698.81  |
| Pathology                     | 1620.52 | 1486.19 | 1638.03 | 2136.97 | 2484.83 | 2540.07 | 2202.75 | 1911.83 | 1902.49 | 2035.47 |
| Pediatrics                    | 359.27  | 347.60  | 352.27  | 388.35  | 430.29  | 430.77  | 404.95  | 414.89  | 451.71  | 500.34  |
| Physical Medicine & Rehab     | 91.84   | 164.28  | 245.29  | 184.19  | 76.42   | 213.84  | 296.67  | 220.45  | 290.64  | 251.52  |
| Plastic Surgery               | 0       | 0       | 0       | 0       | 0       | 0       | 0       | 0       | 0       | 0       |
| Psychiatry                    | 658.75  | 922.43  | 1025.81 | 969.51  | 843.17  | 820.23  | 829.34  | 805.39  | 864.34  | 1011.76 |
| Radiation-Diagnostic/Oncology | 629.93  | 620.50  | 536.98  | 620.40  | 659.97  | 612.15  | 570.57  | 445.28  | 529.63  | 601.95  |
| Surgery                       | 423.69  | 414.06  | 355.02  | 405.89  | 507.77  | 531.70  | 397.22  | 380.08  | 403.68  | 487.83  |
| Urology                       | 165.44  | 176.52  | 85.77   | 75.55   | 183.77  | 249.72  | 177.50  | 137.68  | 148.87  | 220.27  |
| <b>P30</b>                    |         |         |         |         |         |         |         |         |         |         |
| Anesthesiology                | 0       | 0       | 0       | 24.35   | 0       | 0       | 0       | 0       | 0       | 0       |
| Dermatology                   | 517.27  | 390.85  | 532.97  | 597.24  | 553.45  | 625.58  | 543.26  | 268.00  | 247.82  | 248.38  |
| Emergency Medicine            | 0       | 0       | 0       | 0       | 0       | 0       | 0       | 0       | 0       | 0       |
| Family Medicine               | 0       | 4.46    | 4.35    | 4.32    | 4.27    | 4.23    | 13.21   | 14.08   | 17.13   | 19.61   |
| Internal Medicine/Medicine    | 2716.56 | 2911.97 | 3057.10 | 3514.81 | 3147.97 | 3230.52 | 3307.98 | 3315.39 | 3776.81 | 4086.91 |
| Neurology                     | 1056.37 | 1155.52 | 1063.93 | 976.67  | 998.45  | 1076.64 | 1065.6  | 1194.65 | 1491.94 | 3464.85 |
| Neurosurgery                  | 374.49  | 518.96  | 483.66  | 340.21  | 327.09  | 117.33  | 113.03  | 108.60  | 121.46  | 0       |
| Obstetrics and Gynecology     | 143.68  | 142.88  | 126.34  | 130.71  | 139.49  | 138.61  | 0       | 58.71   | 68.05   | 121.03  |
| Ophthalmology                 | 1044.94 | 1191.91 | 962.15  | 936.54  | 896.10  | 838.56  | 834.51  | 920.85  | 910.75  | 891.43  |
| Orthopedics                   | 126.20  | 128.06  | 123.40  | 159.49  | 159.80  | 184.41  | 183.39  | 181.70  | 237.86  | 236.51  |
| Otolaryngology                | 539.17  | 520.92  | 493.72  | 475.65  | 318.33  | 242.09  | 64.56   | 569.30  | 524.67  | 785.66  |
| Pathology                     | 1669.05 | 1201.52 | 2648.08 | 2685.00 | 2537.14 | 3274.77 | 2774.65 | 1105.85 | 1017.10 | 1295.16 |
| Pediatrics                    | 473.59  | 415.55  | 395.36  | 299.96  | 295.02  | 257.04  | 245.91  | 183.70  | 192.70  | 283.01  |
| Physical Medicine & Rehab     | 0       | 0       | 0       | 0       | 0       | 0       | 0       | 0       | 0       | 0       |
| Psychiatry                    | 461.43  | 454.04  | 523.37  | 431.27  | 485.37  | 354.58  | 305.35  | 248.26  | 224.58  | 251.57  |
| Radiation-Diagnostic/Oncology | 87.87   | 107.87  | 113.69  | 155.26  | 306.04  | 173.72  | 222.79  | 212.66  | 273.83  | 312.30  |
| Surgery                       | 959.11  | 834.32  | 964.72  | 633.35  | 1001.65 | 1008.56 | 1502.64 | 1353.30 | 1166.66 | 1671.84 |
| Urology                       | 492.04  | 482.37  | 403.34  | 541.80  | 544.71  | 641.88  | 0       | 0       | 0       | 0       |
| <b>U01</b>                    |         |         |         |         |         |         |         |         |         |         |
| Anesthesiology                | 82.34   | 78.08   | 86.27   | 169.91  | 143.55  | 290.84  | 216.78  | 199.31  | 270.34  | 242.66  |
| Dermatology                   | 74.83   | 225.95  | 216.31  | 194.10  | 348.67  | 231.45  | 264.07  | 290.01  | 653.25  | 420.90  |
| Emergency Medicine            | 536.81  | 473.85  | 220.31  | 182.80  | 111.41  | 80.69   | 152.40  | 577.11  | 43.66   | 316.01  |
| Family Medicine               | 49.45   | 76.23   | 81.82   | 89.31   | 106.29  | 85.84   | 55.19   | 76.33   | 84.37   | 68.42   |
| Internal Medicine/Medicine    | 3621.03 | 3495.78 | 3850.67 | 3696.26 | 3241.76 | 3097.05 | 3393.64 | 3568.23 | 5128.75 | 5808.65 |
| Neurology                     | 4780.51 | 5279.12 | 5436.02 | 5968.05 | 4829.93 | 6481.36 | 5132.2  | 8026.10 | 7273.08 | 9843.68 |
| Neurosurgery                  | 913.42  | 899.29  | 3027.48 | 2859.72 | 2140.20 | 4737.37 | 4929.55 | 2461.91 | 1190.18 | 972.87  |
| Obstetrics and Gynecology     | 629.11  | 419.96  | 127.76  | 267.54  | 1143.03 | 234.52  | 211.01  | 291.24  | 188.14  | 198.16  |
| Ophthalmology                 | 130.77  | 135.16  | 105.76  | 73.45   | 159.59  | 199.27  | 205.96  | 323.00  | 352.57  | 411.20  |
| Orthopedics                   | 0       | 0       | 26.92   | 34.13   | 10.27   | 10.31   | 0       | 0       | 36.97   | 34      |
| Otolaryngology                | 153.02  | 89.48   | 122.50  | 112.01  | 277.47  | 253.36  | 304.57  | 417.28  | 220.01  | 318.12  |
| Pathology                     | 3022.5  | 2069.4  | 1985.57 | 1456.02 | 1478.29 | 1902.17 | 2107.76 | 2552.67 | 2365.47 | 2545.45 |
| Pediatrics                    | 1766.44 | 1777.68 | 1619.25 | 1776.41 | 1633.86 | 1466.35 | 1454.22 | 1477.21 | 1365.27 | 1218.99 |
| Physical Medicine & Rehab     | 66.88   | 71.50   | 426.53  | 385.64  | 424.59  | 391.49  | 382.60  | 203.00  | 520.23  | 799.24  |
| Plastic Surgery               | 0       | 0       | 0       | 0       | 0       | 0       | 0       | 59.53   | 58.82   | 58.82   |
| Psychiatry                    | 1085.13 | 1553.90 | 1433.67 | 1624.39 | 1785.65 | 1563.86 | 1344.58 | 1522.54 | 2389.77 | 2034.94 |
| Radiation-Diagnostic/Oncology | 204.33  | 244.96  | 367.51  | 449.29  | 506.26  | 441.85  | 881.23  | 923.37  | 958.93  | 929.28  |
| Surgery                       | 1118.53 | 1522.26 | 1540.99 | 1359.58 | 1590.53 | 1420.41 | 1271.76 | 1548.58 | 157.381 | 1279.99 |
| Urology                       | 1369.09 | 1157.66 | 1208.71 | 790.08  | 667.87  | 736.47  | 770.23  | 687.61  | 1040.73 | 505.66  |

Inflation-Adjusted Dollar amount for each NIH advanced career grant (R01, R03, R21, P30, U01) spent per active physician from 2011-2020 by specialty

|                               | 2011     | 2012     | 2013     | 2014     | 2015     | 2016     | 2017     | 2018     | 2019     | 2020     |
|-------------------------------|----------|----------|----------|----------|----------|----------|----------|----------|----------|----------|
| <b>R01</b>                    |          |          |          |          |          |          |          |          |          |          |
| Anesthesiology                | 1857.17  | 2047.99  | 1931.48  | 2031.25  | 1907.71  | 1915.65  | 1930.22  | 2232.64  | 2285.73  | 2463.85  |
| Dermatology                   | 3680.31  | 3885.13  | 3526.22  | 3230.02  | 3180.43  | 3282.39  | 3015.51  | 3526.49  | 3525.69  | 3422.12  |
| Emergency Medicine            | 356.59   | 355.81   | 357.40   | 382.25   | 392.96   | 419.59   | 459.64   | 492.28   | 600.32   | 774.93   |
| Family Medicine               | 352.34   | 378.28   | 327.08   | 289.76   | 327.61   | 319.48   | 311.93   | 346.48   | 339.97   | 383.63   |
| Internal Medicine/Medicine    | 11841.01 | 11171.16 | 9988.96  | 9954.83  | 9770.64  | 10420.17 | 10999.52 | 11476.32 | 11964.22 | 12867.53 |
| Neurology                     | 16516.17 | 16723.43 | 15648.83 | 15484.14 | 15336.52 | 16815.14 | 18768.82 | 21539.61 | 21477.72 | 25392.40 |
| Neurosurgery                  | 9547.89  | 9789.90  | 8745.41  | 8569.79  | 10713.90 | 11124.49 | 11446.67 | 12176.25 | 12993.19 | 14695.02 |
| Obstetrics and Gynecology     | 1242.54  | 1137.52  | 1131.77  | 1103.78  | 1175.71  | 1423.22  | 1650.70  | 1669.24  | 1990.32  | 2326.07  |
| Ophthalmology                 | 8000.73  | 7948.37  | 7553.12  | 8004.87  | 7439.34  | 7332.12  | 7612.48  | 7923.10  | 8428.94  | 8877.37  |
| Orthopedics                   | 1898.66  | 2042.87  | 2193.01  | 2184.23  | 2056.45  | 2292.59  | 2492.32  | 2597.04  | 2786.66  | 3171.38  |
| Otolaryngology                | 5631.72  | 5908.82  | 5826.16  | 5872.72  | 6303.54  | 6236.54  | 6463.05  | 7255.41  | 8197.88  | 8036.22  |
| Pathology                     | 21647.85 | 21800.50 | 20720.71 | 19580.52 | 20260.44 | 21005.41 | 21138.62 | 23314.32 | 24886.76 | 26404.35 |
| Pediatrics                    | 5629.26  | 5907.28  | 5340.64  | 5375.82  | 5105.01  | 4992.74  | 4668.38  | 4875.54  | 4967.00  | 5602.81  |
| Physical Medicine & Rehab     | 1322.77  | 1475.20  | 1429.65  | 1579.87  | 1395.17  | 1757.99  | 2291.52  | 2521.46  | 2544.68  | 2714.78  |
| Plastic Surgery               | 141.77   | 0.00     | 74.65    | 40.90    | 0.00     | 0.00     | 42.53    | 0.00     | 33.89    | 0.00     |
| Psychiatry                    | 12281.68 | 11935.88 | 10499.14 | 10592.16 | 9933.98  | 10545.85 | 10844.45 | 11430.88 | 11500.29 | 12132.67 |
| Radiation-Diagnostic/Oncology | 6337.9   | 5830.94  | 5179.30  | 4987.09  | 5122.90  | 5465.35  | 5874.80  | 6449.13  | 6456.90  | 6512.38  |
| Surgery                       | 5574.43  | 5346.64  | 4878.63  | 5047.13  | 5289.88  | 5355.64  | 5930.12  | 6222.28  | 6915.37  | 7737.01  |
| Urology                       | 2443.77  | 2515.79  | 2469.45  | 2246.21  | 2069.70  | 1937.56  | 2135.08  | 2137.80  | 2153.51  | 2392.02  |
| <b>R03</b>                    |          |          |          |          |          |          |          |          |          |          |
| Anesthesiology                | 11.22    | 17.51    | 10.48    | 12.28    | 7.30     | 6.88     | 8.44     | 16.19    | 16.37    | 12.80    |
| Dermatology                   | 30.12    | 36.84    | 12.83    | 26.09    | 50.33    | 55.03    | 40.52    | 22.50    | 27.22    | 35.50    |
| Emergency Medicine            | 1.88     | 2.38     | 1.77     | 2.81     | 9.81     | 9.41     | 9.72     | 7.14     | 3.77     | 6.59     |
| Family Medicine               | 6.92     | 6.56     | 7.48     | 4.36     | 3.61     | 3.37     | 1.25     | 1.38     | 4.08     | 3.01     |
| Internal Medicine/Medicine    | 87.07    | 103.14   | 92.91    | 90.38    | 79.48    | 63.89    | 61.86    | 64.71    | 82.97    | 93.46    |
| Neurology                     | 74.68    | 49.48    | 62.74    | 74.94    | 87.83    | 115.55   | 91.77    | 75.79    | 94.85    | 89.10    |
| Neurosurgery                  | 77.53    | 150.06   | 143.21   | 69.61    | 103.89   | 61.00    | 26.66    | 25.44    | 24.36    | 84.81    |
| Obstetrics and Gynecology     | 14.88    | 20.91    | 18.05    | 18.48    | 16.84    | 22.40    | 29.13    | 29.05    | 22.99    | 15.43    |
| Ophthalmology                 | 0        | 0.00     | 0.00     | 10.03    | 13.65    | 4.02     | 5.71     | 9.07     | 14.59    | 14.73    |
| Orthopedics                   | 41.2     | 39.46    | 43.65    | 58.45    | 39.97    | 24.33    | 11.12    | 16.82    | 33.86    | 28.61    |
| Otolaryngology                | 186.14   | 240.57   | 246.24   | 198.85   | 187.44   | 165.05   | 171.95   | 120.99   | 28.63    | 41.87    |
| Pathology                     | 128.58   | 108.61   | 101.13   | 101.75   | 87.38    | 52.30    | 73.37    | 125.79   | 167.87   | 185.58   |
| Pediatrics                    | 52.63    | 42.41    | 46.27    | 43.31    | 49.12    | 64.15    | 48.41    | 57.05    | 46.33    | 52.70    |
| Physical Medicine & Rehab     | 79.07    | 61.41    | 49.96    | 62.86    | 42.12    | 39.63    | 16.81    | 45.78    | 75.05    | 64.08    |
| Plastic Surgery               | 0        | 0.00     | 0.00     | 0.00     | 0.00     | 10.08    | 9.91     | 0.00     | 0.00     | 0.00     |
| Psychiatry                    | 69.28    | 70.46    | 68.46    | 60.11    | 52.55    | 54.94    | 62.97    | 48.95    | 42.46    | 39.99    |
| Radiation-Diagnostic/Oncology | 24.15    | 14.49    | 18.97    | 34.13    | 37.40    | 17.17    | 21.24    | 34.67    | 47.11    | 44.41    |
| Surgery                       | 51.84    | 66.32    | 52.75    | 58.67    | 55.73    | 43.96    | 76.99    | 63.44    | 35.00    | 55.03    |
| Urology                       | 7.94     | 24.12    | 15.15    | 34.37    | 44.93    | 28.20    | 7.44     | 7.50     | 24.43    | 32.33    |
| <b>R21</b>                    |          |          |          |          |          |          |          |          |          |          |
| Anesthesiology                | 133.66   | 120.44   | 132.83   | 116.33   | 136.10   | 134.19   | 115.78   | 161.28   | 186.92   | 148.11   |
| Dermatology                   | 321.61   | 343.39   | 314.52   | 400.33   | 295.17   | 225.42   | 234.51   | 233.04   | 221.38   | 296.54   |
| Emergency Medicine            | 41.72    | 34.15    | 17.53    | 27.95    | 25.07    | 19.46    | 22.73    | 34.77    | 30.93    | 23.37    |
| Family Medicine               | 25.67    | 30.43    | 31.16    | 33.61    | 39.27    | 33.37    | 19.56    | 18.93    | 20.32    | 23.85    |
| Internal Medicine/Medicine    | 710.85   | 733.54   | 664.21   | 622.56   | 608.99   | 643.68   | 603.88   | 578.81   | 562.98   | 609.17   |
| Neurology                     | 999.05   | 1184.29  | 1076.63  | 1060.35  | 1062.42  | 1158.56  | 1160.26  | 1245.33  | 1593.65  | 1227.72  |
| Neurosurgery                  | 478.39   | 715.27   | 827.13   | 869.13   | 1275.22  | 1345.55  | 942.40   | 879.89   | 1784.94  | 1517.68  |
| Obstetrics and Gynecology     | 168.4    | 127.65   | 135.43   | 112.42   | 118.32   | 105.56   | 97.34    | 121.37   | 128.40   | 199.82   |
| Ophthalmology                 | 216.49   | 209.07   | 308.65   | 289.26   | 404.05   | 330.40   | 239.34   | 304.36   | 519.05   | 500.65   |
| Orthopedics                   | 139.37   | 181.35   | 168.92   | 131.96   | 140.60   | 141.80   | 247.04   | 330.99   | 221.61   | 231.16   |
| Otolaryngology                | 289.56   | 343.22   | 477.17   | 511.13   | 445.63   | 287.57   | 284.48   | 482.88   | 500.18   | 602.47   |
| Pathology                     | 1620.52  | 1459.48  | 1579.63  | 2021.66  | 2324.19  | 2356.36  | 2007.67  | 1702.83  | 1661.99  | 1754.86  |
| Pediatrics                    | 359.27   | 341.35   | 339.71   | 367.40   | 402.47   | 399.61   | 369.09   | 369.53   | 394.61   | 431.36   |
| Physical Medicine & Rehab     | 91.84    | 161.33   | 236.54   | 174.25   | 71.48    | 198.37   | 270.40   | 196.35   | 253.90   | 216.85   |
| Plastic Surgery               | 0        | 0.00     | 0.00     | 0.00     | 0.00     | 0.00     | 0.00     | 0.00     | 0.00     | 0.00     |
| Psychiatry                    | 658.75   | 905.85   | 989.24   | 917.20   | 788.66   | 760.91   | 755.89   | 717.34   | 755.07   | 872.28   |
| Radiation-Diagnostic/Oncology | 629.93   | 609.35   | 517.83   | 586.92   | 617.30   | 567.88   | 520.04   | 396.60   | 462.68   | 518.97   |
| Surgery                       | 423.69   | 406.62   | 342.36   | 383.99   | 474.94   | 493.24   | 362.04   | 338.53   | 352.65   | 420.58   |
| Urology                       | 165.44   | 173.35   | 82.71    | 71.47    | 171.89   | 231.66   | 161.78   | 122.63   | 130.05   | 189.90   |
| <b>P30</b>                    |          |          |          |          |          |          |          |          |          |          |
| Anesthesiology                | 0        | 0.00     | 0.00     | 23.04    | 0.00     | 0.00     | 0.00     | 0.00     | 0.00     | 0.00     |
| Dermatology                   | 517.27   | 383.83   | 513.97   | 565.01   | 517.67   | 580.33   | 495.15   | 238.70   | 216.49   | 214.14   |
| Emergency Medicine            | 0        | 0.00     | 0.00     | 0.00     | 0.00     | 0.00     | 0.00     | 0.00     | 0.00     | 0.00     |
| Family Medicine               | 0        | 4.38     | 4.19     | 4.09     | 3.99     | 3.92     | 12.04    | 12.54    | 14.96    | 16.91    |
| Internal Medicine/Medicine    | 2716.56  | 2859.64  | 2948.10  | 3325.16  | 2944.45  | 2996.87  | 3015.02  | 2952.95  | 3299.36  | 3523.49  |
| Neurology                     | 1056.37  | 1134.75  | 1026.00  | 923.97   | 933.90   | 998.77   | 971.23   | 1064.05  | 1303.34  | 2987.19  |
| Neurosurgery                  | 374.49   | 509.63   | 466.42   | 321.85   | 305.94   | 108.84   | 103.02   | 96.73    | 106.11   | 0.00     |
| Obstetrics and Gynecology     | 143.68   | 140.31   | 121.84   | 123.66   | 130.47   | 128.58   | 0.00     | 52.29    | 59.45    | 104.34   |
| Ophthalmology                 | 1044.94  | 1170.49  | 927.85   | 886.01   | 838.17   | 777.91   | 760.60   | 820.18   | 795.62   | 768.54   |
| Orthopedics                   | 126.2    | 125.76   | 119.00   | 150.88   | 149.47   | 171.07   | 167.15   | 161.84   | 207.79   | 203.91   |
| Otolaryngology                | 539.17   | 511.56   | 476.12   | 449.98   | 297.75   | 224.58   | 58.84    | 507.06   | 458.34   | 677.35   |
| Pathology                     | 1669.05  | 1179.93  | 2553.67  | 2540.12  | 2373.11  | 3037.92  | 2528.92  | 984.96   | 888.52   | 1116.61  |
| Pediatrics                    | 473.59   | 408.08   | 381.26   | 283.77   | 275.95   | 238.45   | 224.13   | 163.62   | 168.34   | 243.99   |
| Physical Medicine & Rehab     | 0        | 0.00     | 0.00     | 0.00     | 0.00     | 0.00     | 0.00     | 0.00     | 0.00     | 0.00     |
| Psychiatry                    | 461.43   | 445.88   | 504.71   | 408.00   | 453.99   | 328.93   | 278.31   | 221.12   | 196.19   | 216.89   |
| Radiation-Diagnostic/Oncology | 87.87    | 105.93   | 109.64   | 146.88   | 286.25   | 161.16   | 203.06   | 189.41   | 239.21   | 269.25   |
| Surgery                       | 959.11   | 819.33   | 930.32   | 599.18   | 936.89   | 935.62   | 1369.56  | 1205.36  | 1019.18  | 1441.36  |
| Urology                       | 492.04   | 473.70   | 388.96   | 512.57   | 509.49   | 595.46   | 0.00     | 0.00     | 0.00     | 0.00     |
| <b>U01</b>                    |          |          |          |          |          |          |          |          |          |          |
| Anesthesiology                | 82.34    | 76.68    | 83.19    | 160.74   | 134.27   | 269.80   | 197.58   | 177.52   | 236.16   | 209.21   |
| Dermatology                   | 74.83    | 221.89   | 208.60   | 183.63   | 326.13   | 214.71   | 240.68   | 258.31   | 570.67   | 362.88   |

|                               |         |         |         |         |         |         |         |         |         |         |
|-------------------------------|---------|---------|---------|---------|---------|---------|---------|---------|---------|---------|
| Emergency Medicine            | 536.81  | 465.33  | 212.46  | 172.94  | 104.21  | 74.85   | 138.90  | 514.01  | 38.14   | 272.45  |
| Family Medicine               | 49.45   | 74.86   | 78.90   | 84.49   | 99.42   | 79.63   | 50.30   | 67.99   | 73.70   | 58.99   |
| Internal Medicine/Medicine    | 3621.03 | 3432.95 | 3713.38 | 3496.82 | 3032.18 | 2873.05 | 3093.09 | 3178.15 | 4480.40 | 5007.88 |
| Neurology                     | 4780.51 | 5184.24 | 5242.20 | 5646.02 | 4517.67 | 6012.59 | 4677.68 | 7148.68 | 6353.65 | 8486.64 |
| Neurosurgery                  | 913.42  | 883.13  | 2919.54 | 2705.41 | 2001.84 | 4394.74 | 4492.97 | 2192.77 | 1039.72 | 838.75  |
| Obstetrics and Gynecology     | 629.11  | 412.41  | 123.20  | 253.10  | 1069.13 | 217.56  | 192.32  | 259.40  | 164.36  | 170.84  |
| Ophthalmology                 | 130.77  | 132.73  | 101.99  | 69.49   | 149.27  | 184.86  | 187.72  | 287.69  | 308.00  | 354.51  |
| Orthopedics                   | 0       | 0.00    | 25.96   | 32.29   | 9.61    | 9.56    | 0.00    | 0.00    | 32.30   | 29.31   |
| Otolaryngology                | 153.02  | 87.87   | 118.13  | 105.97  | 259.53  | 235.04  | 277.60  | 371.66  | 192.20  | 274.26  |
| Pathology                     | 3022.5  | 2032.21 | 1914.78 | 1377.46 | 1382.72 | 1764.59 | 1921.09 | 2273.61 | 2066.44 | 2194.54 |
| Pediatrics                    | 1766.44 | 1745.73 | 1561.52 | 1680.56 | 1528.23 | 1360.30 | 1325.43 | 1315.72 | 1192.68 | 1050.94 |
| Physical Medicine & Rehab     | 66.88   | 70.22   | 411.32  | 364.83  | 397.14  | 363.18  | 348.72  | 180.81  | 454.46  | 689.06  |
| Plastic Surgery               | 0       | 0.00    | 0.00    | 0.00    | 0.00    | 0.00    | 0.00    | 53.02   | 51.38   | 50.71   |
| Psychiatry                    | 1085.13 | 1525.97 | 1382.55 | 1536.74 | 1670.21 | 1450.75 | 1225.50 | 1356.09 | 2087.67 | 1754.41 |
| Radiation-Diagnostic/Oncology | 204.33  | 240.56  | 354.41  | 425.05  | 473.53  | 409.89  | 803.19  | 822.43  | 837.71  | 801.17  |
| Surgery                       | 1118.53 | 1494.90 | 1486.05 | 1286.22 | 1487.70 | 1317.68 | 1159.13 | 1379.29 | 137.49  | 1103.53 |
| Urology                       | 1369.09 | 1136.85 | 1165.61 | 747.45  | 624.69  | 683.20  | 702.02  | 612.44  | 909.17  | 435.95  |

Supplementary Table 13: Mean NIH training grant (F32, T32) funding amount from 2011-2020 by specialty

|                               | 2011       | 2012       | 2013       | 2014       | 2015       | 2016       | 2017       | 2018       | 2019       | 2020       |
|-------------------------------|------------|------------|------------|------------|------------|------------|------------|------------|------------|------------|
| F32                           |            |            |            |            |            |            |            |            |            |            |
| Anesthesiology                | 47,914.25  | 51,490.00  | 49,633.25  | 43,534.29  | 23,741.00  | 58,002.00  | 57,066.00  | 57,560.40  | 60,918.00  | 64,990.00  |
| Dermatology                   | 43,343.50  | 55,754.00  | 51,857.67  | 42,836.00  | 49,628.00  | 55,554.00  | 46,238.00  | 58,179.75  | 66,110.00  | 65,894.00  |
| Emergency Medicine            | 59,234.00  | 54,033.00  | 62,234.00  | -          | -          | -          | -          | -          | -          | 65,310.00  |
| Family Medicine               | -          | -          | -          | 56,030.00  | 20,307.00  | -          | -          | -          | -          | -          |
| Internal Medicine/Medicine    | 51,926.46  | 51,811.16  | 50,429.82  | 51,319.95  | 53,518.16  | 53,923.50  | 47,240.95  | 55,961.90  | 61,755.06  | 66,378.50  |
| Neurology                     | 48,824.33  | 44,860.50  | 48,197.95  | 49,647.19  | 50,244.97  | 56,367.65  | 42,558.86  | 56,279.00  | 54,616.14  | 63,340.64  |
| Neurosurgery                  | 52,676.12  | 45,676.25  | 42,293.62  | 51,613.00  | 50,253.00  | 53,844.20  | 58,787.33  | 53,451.73  | 55,313.00  | 60,524.92  |
| Obstetrics and Gynecology     | 52,343.00  | 48,368.00  | 43,787.75  | 53,768.00  | 55,170.80  | 57,281.00  | 48,730.00  | 59,250.00  | 62,027.60  | 60,798.40  |
| Ophthalmology                 | 45,094.75  | 50,123.71  | 55,008.00  | 54,536.44  | 53,676.33  | 49,738.75  | 43,040.30  | 59,953.43  | 59,131.89  | 56,727.30  |
| Orthopedics                   | 49,338.00  | 48,075.67  | 50,392.60  | 46,269.20  | 53,574.33  | 48,082.83  | 55,240.00  | 61,271.14  | 63,762.00  | 67,321.00  |
| Otolaryngology                | 52,747.00  | 54,843.71  | 50,681.71  | 50,843.50  | 49,508.33  | 57,822.62  | 42,489.86  | 54,204.30  | 62,456.62  | 72,395.00  |
| Pathology                     | 51,873.14  | 50,886.24  | 43,413.09  | 46,494.82  | 52,489.91  | 54,737.84  | 37,180.08  | 61,869.82  | 61,228.88  | 55,828.23  |
| Pediatrics                    | 53,559.40  | 52,427.22  | 51,929.29  | 51,190.00  | 48,164.61  | 45,491.18  | 49,132.40  | 58,639.23  | 60,939.11  | 55,600.83  |
| Physical Medicine & Rehab     | 51,326.00  | 51,821.00  | -          | 55,982.00  | 40,795.00  | 68,949.00  | 62,763.00  | 61,516.50  | 65,694.00  | 68,436.00  |
| Plastic Surgery               | -          | -          | -          | -          | -          | -          | -          | -          | 70,552.00  | -          |
| Psychiatry                    | 49,255.31  | 47,980.59  | 47,068.46  | 48,248.08  | 52,733.33  | 53,797.79  | 40,610.76  | 55,418.88  | 58,605.48  | 63,169.34  |
| Radiation-Diagnostic/Oncology | 50,566.64  | 49,940.50  | 37,040.60  | 55,094.00  | 55,880.00  | 53,115.56  | 47,848.12  | 61,253.57  | 67,271.25  | 65,120.57  |
| Surgery                       | 48,888.53  | 50,666.33  | 50,921.23  | 51,721.74  | 54,732.95  | 51,360.80  | 55,393.12  | 64,262.30  | 67,220.20  | 72,716.73  |
| Urology                       | 58,202.00  | 53,066.00  | 55,670.00  | 44,500.00  | 60,380.00  | 51,878.67  | 39,434.67  | 74,086.00  | 65,606.00  | 80,358.00  |
| T32                           |            |            |            |            |            |            |            |            |            |            |
| Anesthesiology                | 177,313.40 | 176,064.90 | 194,942.40 | 191,664.00 | 229,197.30 | 261,418.50 | 214,919.70 | 265,184.00 | 254,169.90 | 299,745.20 |
| Dermatology                   | 187,196.80 | 203,836.20 | 188,549.20 | 167,228.80 | 214,451.50 | 214,313.90 | 206,142.70 | 217,967.20 | 279,571.00 | 254,416.00 |
| Emergency Medicine            | -          | -          | -          | -          | -          | 168,966.00 | 369,797.00 | 446,984.50 | 458,056.00 | 365,562.00 |
| Family Medicine               | 246,991.00 | 292,899.00 | 254,736.30 | 297,305.80 | 376,785.20 | 332,118.50 | 243,977.20 | 347,868.00 | 368,096.20 | 349,901.40 |
| Internal Medicine/Medicine    | 301,089.20 | 298,071.10 | 312,795.30 | 315,749.30 | 340,196.50 | 351,412.10 | 265,624.40 | 362,508.90 | 387,754.70 | 381,541.10 |
| Neurology                     | 257,944.60 | 248,875.60 | 259,835.60 | 313,442.20 | 310,645.00 | 332,014.40 | 284,266.30 | 313,233.30 | 259,761.20 | 311,463.30 |
| Neurosurgery                  | 197,192.30 | 177,160.70 | 193,940.30 | 199,963.30 | 347,813.40 | 363,970.00 | 273,969.30 | 568,351.80 | 611,950.20 | 501,294.40 |
| Obstetrics and Gynecology     | 199,358.80 | 216,580.20 | 210,501.20 | 238,399.90 | 223,788.80 | 244,205.40 | 165,655.80 | 237,966.30 | 220,205.90 | 260,306.00 |
| Ophthalmology                 | 191,942.20 | 198,428.80 | 211,319.40 | 231,037.90 | 235,602.10 | 214,293.00 | 139,347.60 | 184,728.10 | 187,265.60 | 206,601.10 |
| Orthopedics                   | 218,841.90 | 231,324.10 | 227,927.00 | 231,027.90 | 240,819.90 | 239,498.30 | 229,004.50 | 223,953.60 | 239,265.70 | 259,178.40 |
| Otolaryngology                | 206,410.50 | 278,268.20 | 258,790.70 | 262,284.30 | 264,087.20 | 251,168.30 | 149,735.40 | 257,186.90 | 267,736.80 | 301,986.80 |
| Pathology                     | 380,784.30 | 398,268.50 | 374,945.80 | 340,587.00 | 359,971.80 | 343,585.70 | 281,690.50 | 368,287.30 | 386,528.50 | 366,898.70 |
| Pediatrics                    | 226,569.60 | 242,487.10 | 251,749.30 | 248,890.50 | 272,019.20 | 292,232.50 | 249,166.00 | 332,139.50 | 338,472.10 | 358,133.20 |
| Physical Medicine & Rehab     | 159,013.20 | 266,958.20 | 272,975.00 | 281,319.30 | 313,034.30 | 250,943.80 | 212,667.80 | 257,476.20 | 315,693.50 | 320,902.00 |
| Plastic Surgery               | -          | -          | -          | -          | -          | -          | -          | -          | -          | -          |
| Psychiatry                    | 260,461.80 | 261,552.40 | 254,036.70 | 241,928.30 | 255,408.40 | 286,070.20 | 197,495.20 | 312,247.00 | 333,855.00 | 367,256.80 |
| Radiation-Diagnostic/Oncology | 253,584.50 | 204,744.00 | 211,428.10 | 187,940.40 | 195,605.00 | 266,952.50 | 181,965.90 | 243,591.80 | 259,048.50 | 255,330.70 |
| Surgery                       | 233,508.00 | 219,160.50 | 208,387.80 | 225,132.50 | 218,762.10 | 251,569.50 | 231,538.90 | 302,109.40 | 307,981.10 | 298,942.30 |
| Urology                       | 154,911.30 | 152,947.90 | 164,463.90 | 145,810.40 | 129,597.00 | 151,069.50 | 155,845.80 | 167,294.00 | 247,190.80 | 288,956.20 |

Inflation-Adjusted Mean NIH training grant (F32, T32) funding amount from 2011-2020 by specialty

|                               | 2011      | 2012      | 2013      | 2014      | 2015      | 2016      | 2017      | 2018      | 2019      | 2020      |
|-------------------------------|-----------|-----------|-----------|-----------|-----------|-----------|-----------|-----------|-----------|-----------|
| F32                           |           |           |           |           |           |           |           |           |           |           |
| Anesthesiology                | 47,914.25 | 50,564.63 | 47,863.62 | 41,185.25 | 22,206.14 | 53,806.97 | 52,012.07 | 51,267.85 | 53,217.04 | 56,030.55 |
| Dermatology                   | 43,343.50 | 54,752.00 | 50,008.73 | 40,524.64 | 46,419.54 | 51,536.02 | 42,143.03 | 51,819.50 | 57,752.69 | 56,809.93 |
| Emergency Medicine            | 59,234.00 | 53,061.93 | 60,015.10 | -         | -         | -         | -         | -         | -         | 56,306.44 |
| Family Medicine               | -         | -         | -         | -         | -         | -         | -         | -         | -         | -         |
| Internal Medicine/Medicine    | 51,926.46 | 50,880.02 | 48,631.79 | 48,550.81 | 50,058.20 | 50,023.45 | 43,057.15 | 49,844.10 | 53,948.28 | 57,227.64 |
| Neurology                     | 48,824.33 | 44,054.28 | 46,479.50 | 46,968.31 | 46,996.62 | 52,290.82 | 38,789.72 | 50,126.54 | 47,711.83 | 54,608.57 |
| Neurosurgery                  | 52,676.12 | 44,855.37 | 40,785.68 | 48,828.05 | 47,004.14 | 49,949.88 | 53,580.95 | 47,608.35 | 48,320.59 | 52,181.02 |
| Obstetrics and Gynecology     | 52,343.00 | 47,498.74 | 42,226.54 | 50,866.76 | 51,604.00 | 53,138.11 | 44,414.33 | 52,772.74 | 54,186.37 | 52,416.80 |
| Ophthalmology                 | 45,094.75 | 49,222.90 | 53,046.74 | 51,593.74 | 50,206.15 | 46,141.36 | 39,228.53 | 53,399.28 | 51,656.72 | 48,906.94 |
| Orthopedics                   | 49,338.00 | 47,211.67 | 48,595.90 | 43,772.59 | 50,110.74 | 44,605.21 | 50,347.79 | 54,572.93 | 55,701.51 | 58,040.20 |
| Otolaryngology                | 52,747.00 | 53,858.07 | 48,874.70 | 48,100.07 | 46,307.61 | 53,640.56 | 38,726.83 | 48,278.64 | 54,561.15 | 62,414.71 |
| Pathology                     | 51,873.14 | 49,971.73 | 41,865.24 | 43,986.03 | 49,096.43 | 50,778.89 | 33,887.30 | 55,106.16 | 53,488.62 | 48,131.81 |
| Pediatrics                    | 53,559.40 | 51,485.01 | 50,077.80 | 48,427.87 | 45,050.76 | 42,201.00 | 44,781.09 | 52,228.74 | 53,235.48 | 47,935.76 |
| Physical Medicine & Rehab     | 51,326.00 | 50,889.69 | -         | 52,961.30 | 38,157.60 | 63,962.22 | 57,204.53 | 54,791.47 | 57,389.28 | 59,001.49 |
| Plastic Surgery               | -         | -         | -         | -         | -         | -         | -         | -         | -         | -         |
| Psychiatry                    | 49,255.31 | 47,118.30 | 45,390.28 | 45,644.69 | 49,324.11 | 49,906.83 | 37,014.15 | 49,360.45 | 51,196.85 | 54,460.89 |
| Radiation-Diagnostic/Oncology | 50,566.64 | 49,042.98 | 35,719.95 | 52,121.22 | 52,267.35 | 49,273.94 | 43,610.55 | 54,557.28 | 58,767.14 | 56,143.12 |
| Surgery                       | 48,888.53 | 49,755.77 | 49,105.68 | 48,930.92 | 51,194.46 | 47,646.10 | 50,487.34 | 57,237.10 | 58,722.54 | 62,692.09 |
| Urology                       | 58,202.00 | 52,112.31 | 53,685.14 | 42,098.85 | 56,476.42 | 48,126.51 | 35,942.22 | 65,986.86 | 57,312.40 | 69,279.94 |

| T32                               | 2011       | 2012       | 2013       | 2014       | 2015       | 2016       | 2017       | 2018       | 2019       | 2020       |
|-----------------------------------|------------|------------|------------|------------|------------|------------|------------|------------|------------|------------|
| Anesthesiology                    | 177,313.40 | 172,900.71 | 187,991.91 | 181,322.12 | 214,379.66 | 242,511.23 | 195,885.79 | 236,193.88 | 222,038.95 | 258,422.67 |
| Dermatology                       | 187,196.80 | 200,172.91 | 181,826.65 | 158,205.40 | 200,587.18 | 198,813.50 | 187,886.10 | 194,138.86 | 244,228.96 | 219,342.50 |
| Emergency Medicine                |            |            |            |            |            |            |            |            |            |            |
| Family Medicine                   | 246,991.00 | 287,635.09 | 245,653.91 | 281,263.65 | 352,425.98 | 308,097.80 | 222,369.87 | 309,838.80 | 321,563.23 | 301,664.40 |
| Internal Medicine/<br>Medicine    | 301,089.20 | 292,714.24 | 301,642.87 | 298,711.97 | 318,202.74 | 325,995.98 | 242,099.93 | 322,879.15 | 338,736.59 | 328,942.29 |
| Neurology                         | 257,944.60 | 244,402.87 | 250,571.40 | 296,529.36 | 290,561.75 | 308,001.23 | 259,090.85 | 278,990.40 | 226,923.42 | 268,525.33 |
| Neurosurgery                      | 197,192.30 | 173,976.81 | 187,025.53 | 189,173.60 | 325,327.21 | 337,645.62 | 249,705.78 | 506,219.15 | 534,590.36 | 432,186.53 |
| Obstetrics and<br>Gynecology      | 199,358.80 | 212,687.88 | 202,995.97 | 225,536.22 | 209,320.82 | 226,543.08 | 150,984.84 | 211,951.64 | 192,368.52 | 224,420.52 |
| Ophthalmology                     | 191,942.20 | 194,862.69 | 203,785.00 | 218,571.46 | 220,370.39 | 198,794.11 | 127,006.57 | 164,533.48 | 163,592.37 | 178,119.31 |
| Orthopedics                       | 218,841.90 | 227,166.80 | 219,800.47 | 218,562.00 | 225,250.86 | 222,176.42 | 208,723.20 | 199,470.82 | 209,018.87 | 223,448.37 |
| Otolaryngology                    | 206,410.50 | 273,267.23 | 249,563.75 | 248,131.86 | 247,013.92 | 233,002.38 | 136,474.40 | 229,071.03 | 233,890.79 | 260,355.25 |
| Pathology                         | 380,784.30 | 382,272.67 | 361,577.45 | 322,209.47 | 336,699.57 | 318,735.63 | 256,743.17 | 328,025.85 | 337,665.40 | 316,318.47 |
| Pediatrics                        | 226,569.60 | 238,129.18 | 242,773.41 | 235,460.77 | 254,433.12 | 271,096.59 | 227,099.14 | 295,829.76 | 295,684.06 | 308,761.37 |
| Physical Medicine &<br>Rehab      | 159,013.20 | 262,160.50 | 263,242.32 | 266,139.76 | 292,796.58 | 232,794.12 | 193,833.32 | 229,328.70 | 275,785.03 | 276,662.82 |
| Plastic Surgery                   | -          | -          | -          | -          | -          | -          | -          | -          | -          | -          |
| Psychiatry                        | 260,461.80 | 256,851.85 | 244,979.25 | 228,874.24 | 238,896.21 | 265,379.98 | 180,004.45 | 278,111.92 | 291,650.64 | 316,627.20 |
| Radiation-Diagnostic/<br>Oncology | 253,584.50 | 201,064.39 | 203,889.82 | 177,799.44 | 182,959.11 | 247,644.98 | 165,850.47 | 216,962.16 | 226,300.82 | 220,131.11 |
| Surgery                           | 233,508.00 | 215,221.80 | 200,957.92 | 212,984.71 | 204,619.10 | 233,374.57 | 211,033.14 | 269,082.57 | 269,047.59 | 257,730.46 |
| Urology                           | 154,911.30 | 150,199.16 | 158,600.09 | 137,942.70 | 121,218.53 | 140,143.30 | 142,043.64 | 149,005.29 | 215,942.11 | 249,121.03 |

Supplementary Table 14: Mean NIH career development grant (K01, K08, K23) funding amount from 2011-2020 by specialty

| K01                               | 2011       | 2012       | 2013       | 2014       | 2015       | 2016       | 2017       | 2018       | 2019       | 2020       |
|-----------------------------------|------------|------------|------------|------------|------------|------------|------------|------------|------------|------------|
| Anesthesiology                    | 120,086.20 | 121,151.50 | 115,788.80 | 122,631.20 | 176,829.40 | 177,605.20 | 171,822.00 | 151,097.00 | 131,069.00 | 141,491.00 |
| Dermatology                       | 93,785.25  | 116,732.20 | 99,330.00  | 111,210.00 | 107,873.70 | 111,286.00 | 116,404.90 | 103,161.40 | 102,986.40 | 117,490.50 |
| Emergency Medicine                | -          | 136,304.00 | 134,016.00 | 132,182.00 | 137,936.00 | -          | -          | 40,536.00  | 123,254.00 | 123,660.00 |
| Family Medicine                   | 112,845.90 | 120,051.80 | 118,157.40 | 128,002.10 | 132,817.90 | 133,941.40 | 135,747.60 | 141,963.10 | 129,695.10 | 138,819.10 |
| Internal Medicine/<br>Medicine    | 127,509.60 | 123,147.00 | 123,903.40 | 130,004.80 | 129,290.10 | 132,724.20 | 144,242.50 | 142,969.40 | 143,327.00 | 140,742.80 |
| Neurology                         | 134,905.80 | 139,454.80 | 144,548.50 | 150,252.70 | 147,094.90 | 147,826.80 | 136,708.40 | 138,698.20 | 129,702.90 | 123,381.30 |
| Neurosurgery                      | 99,353.33  | 80,347.00  | 126,644.00 | -          | -          | 104,760.00 | -          | 158,780.50 | 151,324.70 | 109,357.30 |
| Obstetrics and<br>Gynecology      | 139,635.50 | 171,026.00 | 156,377.50 | 159,980.20 | 155,728.00 | 148,407.80 | 136,159.00 | 128,488.00 | 127,963.10 | 139,234.20 |
| Ophthalmology                     | -          | -          | -          | 131,122.00 | -          | -          | 145,208.00 | 126,603.50 | 129,963.00 | 145,208.00 |
| Orthopedics                       | 123,579.60 | 117,938.50 | 115,494.70 | 121,495.10 | 110,510.50 | 126,430.90 | 124,989.00 | 123,020.40 | 116,702.50 | 117,502.00 |
| Otolaryngology                    | 137,182.00 | 137,182.00 | 137,188.00 | 129,952.00 | -          | -          | -          | -          | -          | 129,771.00 |
| Pathology                         | 118,330.60 | 116,786.60 | 113,168.80 | 107,158.60 | 115,922.80 | 167,622.70 | 161,973.60 | 147,423.50 | 121,876.90 | 131,635.80 |
| Pediatrics                        | 124,242.00 | 133,766.00 | 126,937.50 | 129,747.30 | 135,899.90 | 123,447.50 | 137,237.00 | 145,505.60 | 150,086.00 | 133,047.70 |
| Physical Medicine &<br>Rehab      | 114,634.30 | 91,353.75  | 122,354.20 | 122,099.50 | 123,407.00 | 124,027.90 | 129,660.80 | 128,024.50 | 133,554.80 | 125,854.80 |
| Plastic Surgery                   | -          | -          | -          | -          | -          | -          | -          | -          | -          | -          |
| Psychiatry                        | 148,655.30 | 144,651.20 | 145,283.70 | 152,443.40 | 149,052.30 | 151,938.30 | 149,647.70 | 156,758.20 | 154,175.90 | 150,847.70 |
| Radiation-Diagnostic/<br>Oncology | 122,974.40 | 130,706.80 | 116,722.90 | 143,148.50 | 122,157.10 | 137,792.70 | 142,346.30 | 135,374.40 | 128,713.10 | 137,445.50 |
| Surgery                           | 124,855.50 | 122,972.90 | 112,757.30 | 126,519.10 | 135,341.40 | 142,970.80 | 160,080.20 | 176,646.70 | 171,699.50 | 144,524.30 |
| Urology                           | 105,823.00 | 105,823.00 | 105,823.00 | 137,484.00 | 146,730.30 | 148,409.80 | 141,016.20 | 140,084.40 | 139,784.40 | 144,782.30 |
| K08                               | 2011       | 2012       | 2013       | 2014       | 2015       | 2016       | 2017       | 2018       | 2019       | 2020       |
| Anesthesiology                    | 125,868.50 | 130,766.60 | 138,082.60 | 151,676.50 | 163,094.40 | 171,524.70 | 166,395.30 | 180,576.00 | 180,629.80 | 173,059.70 |
| Dermatology                       | 123,634.20 | 121,501.10 | 113,992.10 | 108,300.60 | 120,100.30 | 161,198.20 | 139,880.80 | 163,778.70 | 143,989.70 | 162,867.30 |
| Emergency Medicine                | 141,586.00 | 142,015.50 | 125,040.90 | 148,179.80 | 149,105.00 | 155,894.10 | 162,261.10 | 160,546.60 | 159,030.30 | 160,115.70 |
| Family Medicine                   | 122,205.80 | 123,184.80 | 135,554.20 | 137,668.00 | 148,187.00 | 145,819.00 | 168,048.00 | 168,048.00 | 171,562.00 | 167,957.70 |
| Internal Medicine/<br>Medicine    | 135,478.30 | 134,615.70 | 136,943.70 | 142,669.50 | 140,445.70 | 154,266.60 | 162,795.70 | 165,745.00 | 165,870.80 | 171,982.30 |
| Neurology                         | 162,383.80 | 160,599.20 | 168,910.60 | 175,436.80 | 156,846.60 | 164,111.20 | 183,334.50 | 189,698.70 | 186,428.20 | 189,501.70 |
| Neurosurgery                      | 165,681.90 | 170,939.90 | 160,663.30 | 164,708.70 | 150,693.80 | 155,605.60 | 158,727.40 | 182,594.00 | 182,323.80 | 180,507.00 |
| Obstetrics and<br>Gynecology      | 134,050.10 | 134,579.40 | 136,049.00 | 119,664.60 | 121,878.00 | 124,569.00 | 166,888.00 | 181,463.60 | 184,982.20 | 186,092.80 |
| Ophthalmology                     | 204,350.20 | 210,972.40 | 184,014.60 | 212,911.40 | 203,695.00 | 194,094.20 | 203,772.30 | 195,569.10 | 202,154.30 | 195,095.20 |
| Orthopedics                       | 179,280.00 | 134,364.00 | 129,774.80 | 109,454.50 | 121,247.50 | 174,153.00 | 171,547.70 | 147,346.10 | 120,988.70 | 141,396.10 |
| Otolaryngology                    | 166,228.00 | 156,362.90 | 176,830.70 | 183,344.60 | 188,773.70 | 188,130.90 | 187,116.00 | 193,339.30 | 180,546.90 | 187,986.70 |
| Pathology                         | 127,919.40 | 129,889.90 | 127,000.10 | 147,248.60 | 142,633.30 | 163,702.00 | 152,111.60 | 167,191.40 | 174,799.40 | 174,170.30 |
| Pediatrics                        | 131,701.80 | 137,711.50 | 139,356.10 | 143,865.50 | 142,323.10 | 147,470.40 | 161,704.00 | 167,077.30 | 171,653.00 | 172,228.00 |
| Physical Medicine &<br>Rehab      | 124,929.00 | 124,929.00 | 124,929.00 | -          | -          | -          | -          | 171,084.00 | 171,045.00 | 171,720.00 |
| Plastic Surgery                   | -          | -          | -          | -          | -          | -          | -          | -          | -          | -          |
| Psychiatry                        | 167,165.70 | 162,011.70 | 156,512.70 | 160,774.70 | 168,384.70 | 169,355.80 | 170,572.30 | 160,770.60 | 171,369.90 | 177,536.00 |
| Radiation-Diagnostic/<br>Oncology | 162,287.60 | 163,995.20 | 163,995.20 | 152,487.80 | 138,629.30 | 171,720.00 | 177,445.30 | 203,390.30 | 206,262.70 | 208,723.60 |
| Surgery                           | 133,971.00 | 141,133.80 | 133,410.60 | 142,876.00 | 142,639.40 | 161,231.70 | 162,646.80 | 166,654.40 | 170,087.20 | 173,347.90 |
| Urology                           | 152,109.50 | 149,671.80 | 126,433.20 | 151,479.60 | 165,470.20 | 164,894.80 | 168,676.40 | 166,015.60 | 222,228.60 | 219,611.00 |
| K23                               | 2011       | 2012       | 2013       | 2014       | 2015       | 2016       | 2017       | 2018       | 2019       | 2020       |
| Anesthesiology                    | 133,340.70 | 155,830.60 | 141,449.70 | 156,572.20 | 154,426.80 | 153,813.90 | 172,864.50 | 179,465.90 | 180,755.90 | 175,125.70 |
| Dermatology                       | 122,563.30 | 122,675.50 | 83,995.33  | 123,012.00 | 85,710.67  | 167,154.20 | 173,453.20 | 151,582.90 | 155,709.10 | 167,417.10 |
| Emergency Medicine                | 130,236.80 | 140,747.70 | 154,086.90 | 154,124.70 | 147,563.30 | 163,834.90 | 177,780.20 | 175,407.00 | 178,953.30 | 172,696.90 |
| Family Medicine                   | 154,195.60 | 156,956.10 | 150,109.50 | 146,538.00 | 107,960.80 | 146,244.80 | 161,528.00 | 160,174.80 | 164,166.00 | 157,210.60 |
| Internal Medicine/<br>Medicine    | 145,051.40 | 146,590.90 | 149,245.80 | 148,408.90 | 147,055.30 | 165,604.00 | 175,093.50 | 178,488.30 | 180,532.60 | 175,648.40 |
| Neurology                         | 147,474.40 | 151,874.90 | 162,050.10 | 167,642.70 | 165,994.60 | 163,494.20 | 182,582.00 | 176,333.10 | 177,600.00 | 184,799.30 |
| Neurosurgery                      | 185,974.00 | 177,987.20 | 184,467.40 | 173,711.80 | 167,926.40 | 145,447.80 | 183,568.00 | 183,766.00 | 185,417.40 | 187,105.50 |
| Obstetrics and<br>Gynecology      | 133,524.90 | 129,024.90 | 126,127.10 | 121,042.70 | 115,983.90 | 129,604.80 | 163,354.60 | 169,060.50 | 173,401.20 | 169,482.20 |
| Ophthalmology                     | 190,213.70 | 213,359.00 | 203,372.30 | 203,470.50 | 207,128.10 | 203,477.50 | 217,257.90 | 193,281.00 | 214,918.40 | 211,700.00 |
| Orthopedics                       | 168,729.00 | 130,244.00 | 106,738.00 | 106,001.00 | 97,252.50  | 173,299.00 | 173,232.00 | 123,099.70 | 164,554.30 | 136,915.80 |
| Otolaryngology                    | 185,635.10 | 208,591.80 | 205,798.00 | 211,281.60 | 216,575.50 | 194,894.20 | 202,767.70 | 202,568.80 | 191,398.80 | 151,949.50 |
| Pathology                         | 129,132.00 | 133,431.30 | 132,375.00 | 133,050.00 | 138,577.00 | 136,984.00 | 146,011.00 | 142,388.00 | 190,080.00 | 175,913.00 |
| Pediatrics                        | 137,762.10 | 137,020.20 | 138,214.20 | 136,091.10 | 138,911.50 | 157,733.50 |            |            |            |            |



Inflation-Adjusted Mean NIH career development grant (K01, K08, K223) funding amount from 2011-2020 by specialty

|                                | 2011       | 2012       | 2013       | 2014       | 2015       | 2016       | 2017       | 2018       | 2019       | 2020       |
|--------------------------------|------------|------------|------------|------------|------------|------------|------------|------------|------------|------------|
| <b>K01</b>                     |            |            |            |            |            |            |            |            |            |            |
| Anesthesiology                 | 120,086.20 | 118,974.20 | 111,660.46 | 116,014.22 | 165,397.35 | 164,759.78 | 156,604.95 | 134,578.96 | 114,499.88 | 121,985.21 |
| Dermatology                    | 93,785.25  | 114,634.32 | 95,788.48  | 105,209.29 | 100,899.65 | 103,237.16 | 106,095.74 | 91,883.72  | 89,967.35  | 101,293.40 |
| Emergency Medicine             | -          | 133,854.38 | 129,237.78 | 125,049.67 | 129,018.42 | -          | -          | 36,122.39  | 107,672.81 | 106,612.38 |
| Family Medicine                | 112,845.90 | 117,894.26 | 113,944.60 | 121,095.31 | 124,231.20 | 124,254.00 | 123,725.40 | 126,443.59 | 113,299.66 | 119,681.66 |
| Internal Medicine/ Medicine    | 127,509.60 | 120,933.83 | 119,485.74 | 122,989.95 | 120,931.47 | 123,124.83 | 131,467.97 | 127,339.88 | 125,208.28 | 121,340.16 |
| Neurology                      | 134,905.80 | 136,948.55 | 139,394.75 | 142,145.30 | 137,585.19 | 137,135.13 | 124,601.11 | 123,535.61 | 113,306.48 | 106,372.10 |
| Neurosurgery                   | 99,353.33  | 78,903.02  | 122,128.62 | -          | -          | 97,183.16  | -          | 141,422.49 | 132,194.95 | 94,281.43  |
| Obstetrics and Gynecology      | 139,635.50 | 167,952.36 | 150,802.00 | 151,347.92 | 145,660.16 | 137,674.11 | 124,100.36 | 114,441.59 | 111,786.61 | 120,039.53 |
| Ophthalmology                  | -          | -          | -          | 124,046.87 | -          | -          | -          | 132,347.96 | 112,763.11 | 113,533.69 |
| Orthopedics                    | 123,579.60 | 115,818.94 | 111,376.84 | 114,939.42 | 103,365.98 | 117,286.70 | 113,919.61 | 109,571.72 | 101,949.52 | 101,303.31 |
| Otolaryngology                 | 137,182.00 | 134,716.60 | 132,296.69 | 122,940.00 | -          | -          | -          | -          | -          | 111,880.92 |
| Pathology                      | 118,330.60 | 114,687.74 | 109,133.87 | 101,376.49 | 108,428.37 | 155,499.27 | 147,628.75 | 131,307.05 | 106,469.80 | -          |
| Pediatrics                     | 124,242.00 | 131,361.99 | 122,411.66 | 122,746.34 | 127,113.95 | 114,519.08 | 125,082.89 | 129,598.82 | 131,112.84 | 114,705.90 |
| Physical Medicine & Rehab      | 114,634.30 | 89,711.96  | 117,991.77 | 115,511.21 | 115,428.72 | 115,057.50 | 118,177.66 | 114,028.76 | 116,671.44 | 108,504.60 |
| Plastic Surgery                | -          | -          | -          | -          | -          | -          | -          | -          | -          | -          |
| Psychiatry                     | 148,655.30 | 142,051.57 | 140,103.74 | 144,217.80 | 139,416.05 | 140,949.26 | 136,394.47 | 139,621.27 | 134,685.71 | 130,052.01 |
| Radiation-Diagnostic/ Oncology | 122,974.40 | 128,357.77 | 112,561.25 | 135,424.44 | 114,259.62 | 127,826.75 | 129,739.70 | 120,575.17 | 112,441.80 | 118,497.42 |
| Surgery                        | 124,855.50 | 120,762.86 | 108,737.04 | 119,692.33 | 126,591.56 | 132,630.34 | 145,903.03 | 157,335.55 | 149,994.06 | 124,600.35 |
| Urology                        | 105,823.00 | 103,921.18 | 102,049.98 | 130,065.58 | 137,244.16 | 137,675.96 | 128,527.40 | 124,770.27 | 122,113.52 | 124,822.78 |
| <b>K08</b>                     |            |            |            |            |            |            |            |            |            |            |
| Anesthesiology                 | 125,868.50 | 128,416.50 | 133,159.39 | 143,492.28 | 152,550.32 | 159,119.06 | 151,658.85 | 160,835.29 | 157,795.44 | 149,201.89 |
| Dermatology                    | 123,634.20 | 119,317.51 | 109,927.81 | 102,456.87 | 112,335.80 | 149,539.43 | 127,492.55 | 145,874.29 | 125,787.21 | 140,414.60 |
| Emergency Medicine             | 141,586.00 | 139,463.23 | 120,582.68 | 140,184.25 | 139,465.34 | 144,618.95 | 147,890.79 | 142,995.52 | 138,926.44 | 138,042.33 |
| Family Medicine                | 122,205.80 | 120,970.95 | 130,721.14 | 130,239.65 | 138,606.69 | 135,272.54 | 153,165.18 | 149,676.86 | 149,873.95 | 144,803.25 |
| Internal Medicine/ Medicine    | 135,478.30 | 132,196.42 | 132,061.10 | 134,971.28 | 131,365.86 | 143,109.16 | 148,378.04 | 147,625.63 | 144,902.20 | 148,273.02 |
| Neurology                      | 162,383.80 | 157,712.95 | 162,888.25 | 165,970.51 | 146,706.44 | 152,241.75 | 167,097.87 | 168,960.69 | 162,860.83 | 163,377.21 |
| Neurosurgery                   | 165,681.90 | 167,867.81 | 154,935.00 | 155,821.28 | 140,951.42 | 144,351.32 | 144,670.04 | 162,632.68 | 159,275.29 | 155,622.51 |
| Obstetrics and Gynecology      | 134,050.10 | 132,160.77 | 131,198.30 | 113,207.69 | 113,998.57 | 115,559.46 | 152,107.91 | 161,625.86 | 161,597.63 | 160,438.26 |
| Ophthalmology                  | 204,350.20 | 207,180.86 | 177,453.73 | 201,423.04 | 190,526.09 | 180,056.21 | 185,725.63 | 174,189.34 | 176,598.91 | 168,199.60 |
| Orthopedics                    | 179,280.00 | 131,949.24 | 125,147.80 | 103,548.51 | 113,408.83 | 161,557.27 | 156,354.94 | 131,238.11 | 105,693.88 | 121,903.40 |
| Otolaryngology                 | 166,228.00 | 153,552.79 | 170,525.96 | 173,451.62 | 176,569.45 | 174,524.21 | 170,544.46 | 172,203.30 | 157,723.02 | 162,071.07 |
| Pathology                      | 127,919.40 | 127,555.55 | 122,472.03 | 139,303.30 | 133,412.03 | 151,862.14 | 138,640.16 | 148,913.91 | 152,702.09 | 150,159.38 |
| Pediatrics                     | 131,701.80 | 135,236.58 | 134,387.48 | 136,102.75 | 133,121.89 | 136,804.50 | 147,383.02 | 148,812.28 | 149,953.44 | 148,484.85 |
| Physical Medicine & Rehab      | 124,929.00 | 122,683.81 | 120,474.77 | -          | -          | -          | -          | 152,380.97 | 149,422.30 | 148,046.88 |
| Plastic Surgery                | -          | -          | -          | -          | -          | -          | -          | -          | -          | -          |
| Psychiatry                     | 167,165.70 | 159,100.07 | 150,932.38 | 152,099.55 | 157,498.60 | 157,107.03 | 155,465.92 | 143,195.04 | 149,706.13 | 153,061.09 |
| Radiation-Diagnostic/ Oncology | 162,287.60 | 161,047.92 | 158,148.10 | 144,259.80 | 129,666.89 | 159,300.23 | 161,730.23 | 181,155.52 | 180,187.95 | 179,949.21 |
| Surgery                        | 133,971.00 | 138,597.38 | 128,653.97 | 135,166.64 | 133,417.74 | -          | 148,242.33 | 148,435.61 | 148,585.58 | 149,450.36 |
| Urology                        | 152,109.50 | 146,981.94 | 121,925.34 | 143,306.00 | 154,772.53 | 152,968.67 | 153,737.93 | 147,866.65 | 194,135.52 | 189,335.68 |
| <b>K23</b>                     |            |            |            |            |            |            |            |            |            |            |
| Anesthesiology                 | 133,340.70 | 153,030.05 | 136,406.44 | 148,123.81 | 144,443.08 | 142,689.21 | 157,555.12 | 159,846.55 | 157,905.60 | 150,983.07 |
| Dermatology                    | 122,563.30 | 120,470.81 | 81,000.55  | 116,374.47 | 80,169.46  | 155,064.66 | 158,091.68 | 135,011.74 | 136,025.10 | 144,337.17 |
| Emergency Medicine             | 130,236.80 | 138,218.22 | 148,593.07 | 145,808.38 | 138,023.31 | 151,985.43 | 162,035.47 | 156,231.37 | 156,330.87 | 148,889.11 |
| Family Medicine                | 154,195.60 | 154,135.32 | 144,757.48 | 138,631.04 | 100,981.12 | 135,667.55 | 147,222.61 | 142,664.37 | 143,412.91 | 135,537.73 |
| Internal Medicine/ Medicine    | 145,051.40 | 143,956.41 | 143,924.58 | 140,400.99 | 137,548.15 | 153,626.58 | 159,586.71 | 158,975.82 | 157,710.53 | 151,433.71 |
| Neurology                      | 147,474.40 | 149,145.44 | 156,272.35 | 158,596.97 | 155,263.02 | 151,669.37 | 166,412.01 | 157,056.23 | 155,155.64 | 159,323.08 |
| Neurosurgery                   | 185,974.00 | 174,788.46 | 177,890.38 | 164,338.59 | 157,069.93 | 134,928.19 | 167,310.69 | 163,676.56 | 161,977.81 | 161,311.35 |
| Obstetrics and Gynecology      | 133,524.90 | 126,706.10 | 121,630.15 | 114,511.43 | 108,485.52 | 120,231.04 | 148,887.44 | 150,578.68 | 151,480.64 | 146,117.58 |
| Ophthalmology                  | 190,213.70 | 209,524.57 | 196,121.24 | 192,491.56 | 193,737.24 | 188,760.85 | 198,016.91 | 172,151.37 | 187,749.44 | 182,515.28 |
| Orthopedics                    | 168,729.00 | 127,903.29 | 102,932.35 | 100,281.36 | 90,965.11  | 160,765.03 | 157,890.07 | 109,642.35 | 143,752.13 | 118,040.75 |
| Otolaryngology                 | 185,635.10 | 204,843.04 | 198,460.46 | 199,881.18 | 202,573.86 | 180,798.34 | 184,810.00 | 180,423.82 | 167,203.07 | 131,001.92 |
| Pathology                      | 129,132.00 | 131,033.31 | 127,655.29 | 127,762.92 | 129,617.97 | 127,076.54 | 133,079.84 | 126,822.03 | 166,050.99 | 151,661.84 |
| Pediatrics                     | 137,762.10 | 134,557.71 | 133,286.30 | 128,747.84 | 129,930.85 | 146,325.32 | 159,585.62 | 156,852.71 | 152,273.25 | 148,925.32 |
| Physical Medicine & Rehab      | 142,022.90 | 154,311.50 | 145,726.94 | 129,158.14 | 135,613.19 | 114,208.49 | 150,712.78 | 120,312.95 | 132,265.10 | 127,114.35 |
| Plastic Surgery                | -          | -          | -          | -          | -          | -          | -          | -          | -          | -          |
| Psychiatry                     | 160,234.10 | 152,786.21 | 156,158.56 | 153,997.22 | 146,351.94 | 152,801.23 | 161,590.69 | 154,874.24 | 153,663.73 | 149,861.34 |
| Radiation-Diagnostic/ Oncology | 158,602.70 | 161,810.96 | 152,274.85 | 153,833.18 | 151,190.88 | 161,046.12 | 164,639.72 | 160,041.70 | 170,957.04 | 166,047.27 |
| Surgery                        | 131,087.50 | 136,724.65 | 129,694.30 | 135,176.38 | 137,446.58 | 179,925.96 | 163,030.76 | 163,112.85 | 151,072.16 | 148,931.26 |
| Urology                        | 157,160.00 | 151,176.38 | 143,171.13 | 146,765.39 | 140,859.48 | 134,846.46 | 142,194.67 | 128,536.59 | 147,163.21 | 144,664.44 |

Supplementary Table 15: Mean NIH advanced career grant (R01, R03, R21,P30, U01) funding amount from 2011-2020 by specialty

|                           | 2011       | 2012       | 2013       | 2014       | 2015       | 2016         | 2017       | 2018       | 2019       | 2020       |
|---------------------------|------------|------------|------------|------------|------------|--------------|------------|------------|------------|------------|
| <b>R01</b>                |            |            |            |            |            |              |            |            |            |            |
| Anesthesiology            | 374,447.70 | 394,100.80 | 381,465.50 | 388,318.40 | 397,822.70 | 406,701.40   | 407,569.50 | 421,265.70 | 442,363.80 | 457,545.10 |
| Dermatology               | 346,269.00 | 353,875.30 | 329,760.60 | 339,497.10 | 343,133.50 | 378,646.10   | 376,141.70 | 401,937.20 | 407,364.50 | 451,637.40 |
| Emergency Medicine        | 466,096.40 | 430,106.60 | 460,062.20 | 470,284.20 | 426,357.60 | 487,572.10   | 508,476.20 | 493,767.40 | 575,232.50 | 549,043.00 |
| Family Medicine           | 487,546.90 | 488,225.60 | 486,072.70 | 495,950.50 | 506,253.30 | 545,224.90   | 554,983.50 | 600,927.30 | 516,841.30 | 531,260.10 |
| Internal Medicine/ Medici | 397,304.00 | 402,009.00 | 394,328.30 | 418,406.80 | 425,020.90 | 444,284.30   | 460,866.00 | 476,968.20 | 496,173.70 | 519,120.80 |
| Neurology                 | 410,236.30 | 402,897.10 | 396,817.20 | 416,205.80 | 415,876.30 | 454,982.50   | 501,719.70 | 527,246.30 | 523,779.60 | 591,815.60 |
| Neurosurgery              | 349,190.00 | 361,219.40 | 334,960.60 | 363,622.60 | 380,344.00 | 392,876.40   | 396,933.90 | 405,769.40 | 419,080.50 | 439,343.10 |
| Obstetrics and Gynecology | 346,000.80 | 353,612.00 | 344,703.60 | 366,529.30 | 395,003.60 | 414,115.00   | 426,231.40 | 462,369.60 | 470,195.60 | 498,958.80 |
| Ophthalmology             | 422,226.60 | 405,362.00 | 408,734.00 | 420,905.30 | 413,073.10 | 423,610.60   | 413,586.50 | 415,660.80 | 427,374.40 | 424,900.50 |
| Orthopedics               | 339,055.70 | 342,596.00 | 328,792.10 | 358,600.80 | 347,868.40 | 359,813.70   | 376,507.60 | 393,633.10 | 400,186.80 | 394,073.30 |
| Otolaryngology            | 366,140.90 | 374,585.90 | 354,134.70 | 370,305.90 | 386,724.90 | 405,442.80   | 444,403.50 | 441,687.90 | 468,107.80 | 484,753.40 |
| Pathology                 | 349,328.10 | 361,402.70 | 346,162.30 | 361,413.00 | 377,671.50 | 394,893.70</ |            |            |            |            |

|                         | 2011         | 2012         | 2013         | 2014         | 2015         | 2016         | 2017         | 2018         | 2019         | 2020         |
|-------------------------|--------------|--------------|--------------|--------------|--------------|--------------|--------------|--------------|--------------|--------------|
| <b>R21</b>              |              |              |              |              |              |              |              |              |              |              |
| Anesthesiology          | 75,013.50    | 80,121.33    | 73,827.00    | 88,809.17    | 80,643.50    | 77,053.25    | 64,444.67    | 84,861.11    | 99,035.62    | 125,495.20   |
| Dermatology             | 65,179.20    | 69,331.67    | 75,557.50    | 79,536.50    | 78,739.62    | 78,298.56    | 76,541.71    | 77,562.50    | 97,484.25    | 103,084.00   |
| Emergency Medicine      | 63,905.00    | 86,342.00    | 68,643.00    | 114,000.00   | 103,827.20   | 103,872.80   | 90,322.40    | 87,723.75    | 97,375.00    | 86,329.25    |
| Family Medicine         | 92,104.25    | 79,953.11    | 93,963.44    | 72,566.71    | 71,569.67    | 81,500.40    | 77,791.50    | 89,625.00    | 110,513.00   | 137,648.00   |
| Internal Medicine/ Med  | 80,464.41    | 83,149.58    | 81,058.10    | 86,721.70    | 88,129.27    | 87,862.07    | 86,184.46    | 83,945.14    | 95,116.11    | 107,653.50   |
| Neurology               | 96,460.50    | 72,986.11    | 77,806.82    | 87,614.08    | 96,734.08    | 105,522.80   | 92,073.53    | 79,031.53    | 102,401.90   | 112,459.50   |
| Neurosurgery            | 130,434.70   | 97,590.25    | 95,985.62    | 77,379.40    | 84,825.57    | 89,403.75    | 80,900.00    | 80,539.50    | 80,125.00    | 94,243.00    |
| Obstetrics and Gynecol  | 75,107.75    | 72,019.92    | 76,442.40    | 66,966.33    | 74,648.30    | 91,245.82    | 88,747.40    | 81,769.53    | 80,324.57    | 76,466.00    |
| Ophthalmology           | -            | -            | -            | 97,812.50    | 90,412.67    | 81,000.00    | 117,750.00   | 97,000.00    | 107,491.00   | 109,985.70   |
| Orthopedics             | 81,667.80    | 78,736.50    | 73,071.33    | 84,992.50    | 81,801.70    | 71,470.57    | 77,298.33    | 119,874.70   | 105,583.60   | 90,420.00    |
| Otolaryngology          | 132,187.70   | 126,241.40   | 125,250.60   | 131,234.80   | 134,709.60   | 140,382.80   | 149,760.80   | 131,110.40   | 160,218.00   | 158,270.30   |
| Pathology               | 77,017.92    | 68,969.52    | 68,464.14    | 72,582.80    | 82,741.27    | 81,826.56    | 86,125.00    | 85,686.81    | 93,440.08    | 108,855.80   |
| Pediatrics              | 76,878.26    | 83,228.93    | 77,130.46    | 76,619.09    | 88,884.12    | 93,250.40    | 88,673.74    | 92,985.63    | 84,607.97    | 105,865.80   |
| Physical Medicine & Rel | 96,047.43    | 77,752.57    | 92,279.40    | 85,749.29    | 82,524.80    | 79,055.80    | 57,416.33    | 122,787.50   | 119,870.90   | 90,743.00    |
| Plastic Surgery         | -            | -            | -            | -            | -            | -            | 77,000.00    | -            | -            | -            |
| Psychiatry              | 106,102.80   | 96,842.21    | 88,253.77    | 108,346.70   | 105,996.80   | 97,768.48    | 91,020.66    | 92,001.78    | 94,258.75    | 112,458.60   |
| Radiation-Diagnostic/ O | 97,959.88    | 74,000.00    | 74,273.10    | 81,043.88    | 73,541.19    | 80,722.22    | 84,385.64    | 87,718.83    | 101,238.20   | 96,695.82    |
| Surgery                 | 90,946.47    | 86,952.30    | 81,038.65    | 92,010.12    | 79,187.47    | 85,131.93    | 84,614.60    | 85,822.24    | 93,100.45    | 108,786.10   |
| Urology                 | 78,000.00    | 80,206.67    | 76,727.50    | 88,901.00    | 94,229.60    | 99,951.67    | 81,000.00    | 84,750.00    | 95,083.67    | 95,640.25    |
| <b>P30</b>              |              |              |              |              |              |              |              |              |              |              |
| Anesthesiology          | 198,626.80   | 206,645.70   | 207,925.40   | 240,374.70   | 214,890.20   | 222,642.60   | 204,033.30   | 205,608.50   | 231,893.00   | 220,026.40   |
| Dermatology             | 183,150.90   | 215,467.50   | 205,891.90   | 187,726.20   | 175,905.80   | 206,179.00   | 206,712.70   | 200,869.70   | 211,443.40   | 215,252.90   |
| Emergency Medicine      | 236,297.20   | 247,628.80   | 225,641.70   | 226,948.40   | 176,774.30   | 171,878.60   | 150,868.10   | 170,914.20   | 266,771.70   | 245,092.00   |
| Family Medicine         | 195,393.30   | 208,657.20   | 185,239.90   | 195,614.40   | 194,681.40   | 175,792.70   | 173,967.60   | 205,190.60   | 171,800.00   | 204,367.60   |
| Internal Medicine/ Med  | 206,711.70   | 201,968.50   | 194,621.30   | 201,298.10   | 195,991.70   | 202,211.70   | 204,170.20   | 203,708.00   | 205,422.00   | 220,545.90   |
| Neurology               | 201,619.80   | 201,549.90   | 201,204.50   | 203,806.60   | 211,268.70   | 214,279.00   | 212,947.40   | 209,448.60   | 241,177.10   | 287,778.60   |
| Neurosurgery            | 185,724.80   | 206,732.60   | 201,600.70   | 230,048.00   | 208,243.30   | 219,118.90   | 211,809.70   | 214,277.20   | 286,452.30   | 306,622.90   |
| Obstetrics and Gynecol  | 206,047.70   | 188,485.70   | 212,358.60   | 195,606.80   | 218,635.10   | 197,080.80   | 211,848.40   | 205,317.70   | 190,272.70   | 230,260.90   |
| Ophthalmology           | 184,974.60   | 203,152.80   | 195,418.10   | 194,578.50   | 223,106.90   | 195,940.80   | 205,887.20   | 210,155.00   | 224,989.80   | 215,666.20   |
| Orthopedics             | 197,322.00   | 180,957.80   | 178,617.30   | 179,097.70   | 179,869.90   | 182,221.90   | 198,079.80   | 196,486.30   | 186,053.10   | 189,359.10   |
| Otolaryngology          | 190,945.80   | 202,619.80   | 219,600.80   | 180,714.10   | 194,943.90   | 209,649.70   | 198,219.80   | 168,791.10   | 186,598.10   | 207,036.90   |
| Pathology               | 195,703.40   | 204,958.00   | 200,512.00   | 206,034.70   | 206,334.40   | 199,877.40   | 204,935.70   | 208,193.80   | 212,859.80   | 238,281.30   |
| Pediatrics              | 191,759.30   | 204,481.70   | 194,309.80   | 204,612.00   | 204,628.20   | 203,089.60   | 203,995.10   | 209,293.80   | 215,602.60   | 229,768.60   |
| Physical Medicine & Rel | 195,226.20   | 204,276.70   | 198,593.80   | 184,909.80   | 175,084.50   | 219,859.90   | 213,217.90   | 210,636.60   | 218,363.20   | 272,956.00   |
| Plastic Surgery         | -            | -            | -            | -            | -            | -            | -            | -            | -            | -            |
| Psychiatry              | 206,745.70   | 210,005.50   | 200,307.60   | 203,195.30   | 203,961.00   | 206,254.10   | 207,092.30   | 208,095.90   | 216,318.70   | 248,406.50   |
| Radiation-Diagnostic/ O | 210,700.90   | 215,624.70   | 198,734.30   | 206,031.30   | 210,710.10   | 203,560.50   | 197,694.80   | 202,985.80   | 212,349.50   | 246,125.20   |
| Surgery                 | 192,224.20   | 197,450.10   | 194,389.40   | 213,268.20   | 206,825.20   | 196,633.60   | 198,945.20   | 196,267.10   | 202,344.50   | 230,940.30   |
| Urology                 | 203,200.80   | 192,179.90   | 167,621.00   | 184,901.50   | 180,240.60   | 189,491.20   | 195,661.90   | 197,886.00   | 189,822.10   | 224,701.10   |
| <b>P30</b>              |              |              |              |              |              |              |              |              |              |              |
| Anesthesiology          | -            | -            | -            | 999,665.00   | -            | -            | -            | -            | -            | -            |
| Dermatology             | 508,803.50   | 541,894.10   | 757,022.80   | 626,258.90   | 809,839.80   | 619,243.90   | 595,169.40   | 658,403.00   | 775,427.80   | 777,173.80   |
| Emergency Medicine      | -            | -            | -            | -            | -            | -            | -            | -            | -            | -            |
| Family Medicine         | -            | 119,990.50   | 118,347.00   | 118,786.20   | 118,793.20   | 118,769.50   | 1,499,404.00 | 1,631,702.00 | 506,108.00   | 579,330.50   |
| Internal Medicine/ Med  | 1,322,479.00 | 1,476,749.00 | 1,647,969.00 | 1,595,381.00 | 1,386,675.00 | 1,343,980.00 | 1,410,555.00 | 1,289,653.00 | 1,454,688.00 | 1,360,467.00 |
| Neurology               | 909,600.70   | 792,808.50   | 874,868.00   | 926,021.70   | 955,091.90   | 972,888.10   | 913,550.00   | 924,625.30   | 1,004,999.00 | 1,531,679.00 |
| Neurosurgery            | 945,027.00   | 883,790.30   | 833,661.70   | 894,494.50   | 874,301.50   | 638,089.00   | 625,169.00   | 612,461.00   | 349,065.00   | -            |
| Obstetrics and Gynecol  | 1,933,778.00 | 1,933,777.00 | 2,578,935.00 | 1,793,093.00 | 1,157,198.00 | 960,318.00   | -            | 825,564.00   | 484,487.50   | 517,036.80   |
| Ophthalmology           | 604,815.60   | 584,035.50   | 587,455.10   | 595,992.60   | 595,040.00   | 627,412.80   | 628,117.10   | 566,308.50   | 676,475.90   | 662,129.10   |
| Orthopedics             | 625,387.50   | 627,439.20   | 597,681.80   | 614,321.00   | 611,879.20   | 703,440.00   | 696,916.40   | 691,739.60   | 755,961.70   | 751,669.50   |
| Otolaryngology          | 622,200.80   | 604,010.00   | 657,359.40   | 556,833.40   | 499,296.20   | 458,450.40   | 614,973.00   | 1,831,543.00 | 5,129,654.00 | 1,280,229.00 |
| Pathology               | 1,470,235.00 | 957,377.10   | 1,815,262.00 | 1,575,747.00 | 1,348,339.00 | 1,711,069.00 | 1,424,948.00 | 704,481.40   | 989,077.50   | 1,091,643.00 |
| Pediatrics              | 1,546,389.00 | 1,105,870.00 | 967,114.30   | 948,261.30   | 943,137.20   | 828,083.70   | 898,125.40   | 911,258.60   | 834,352.40   | 686,218.80   |
| Physical Medicine & Rel | -            | -            | -            | -            | -            | -            | -            | -            | -            | -            |
| Plastic Surgery         | -            | -            | -            | -            | -            | -            | -            | -            | -            | -            |
| Psychiatry              | 1,359,067.00 | 1,143,958.00 | 1,148,220.00 | 1,078,633.00 | 964,003.10   | 1,121,970.00 | 1,060,552.00 | 1,061,952.00 | 791,983.70   | 1,084,308.00 |
| Radiation-Diagnostic/On | 570,185.40   | 631,016.30   | 858,373.40   | 847,082.90   | 1,477,880.00 | 973,777.90   | 887,744.60   | 862,805.50   | 942,347.40   | 1,172,460.00 |
| Surgery                 | 1,941,337.00 | 1,953,115.00 | 1,619,891.00 | 1,331,107.00 | 1,580,976.00 | 1,334,913.00 | 1,881,459.00 | 1,268,240.00 | 1,355,662.00 | 1,473,755.00 |
| Urology                 | 690,688.70   | 787,747.80   | 788,214.80   | 883,989.70   | 890,415.50   | 703,540.90   | -            | -            | -            | -            |
| <b>U01</b>              |              |              |              |              |              |              |              |              |              |              |
| Anesthesiology          | 471,964.90   | 451,071.30   | 502,329.90   | 581,282.50   | 659,561.00   | 805,747.30   | 646,645.70   | 558,255.40   | 952,199.00   | 788,965.70   |
| Dermatology             | 269,879.00   | 501,225.00   | 351,136.30   | 373,138.20   | 510,195.50   | 549,849.80   | 636,470.60   | 593,721.30   | 908,451.60   | 478,907.70   |
| Emergency Medicine      | 1,824,301.00 | 1,298,730.00 | 482,628.40   | 501,535.70   | 551,203.10   | 661,067.80   | 1,613,430.00 | 3,157,825.00 | 657,901.70   | 2,040,631.00 |
| Family Medicine         | 478,966.10   | 586,568.90   | 742,643.20   | 893,927.70   | 883,654.90   | 643,250.80   | 481,880.50   | 589,515.60   | 664,795.80   | 808,722.80   |
| Internal Medicine/ Med  | 1,022,969.00 | 964,165.60   | 989,827.10   | 1,092,75.00  | 886,928.90   | 858,966.50   | 893,301.00   | 856,548.70   | 1,092,779.00 | 1,185,112.00 |
| Neurology               | 1,871,063.00 | 1,720,465.00 | 1,787,908.00 | 1,467,034.00 | 1,155,044.00 | 1,126,302.00 | 1,135,458.00 | 1,597,367.00 | 1,513,014.00 | 1,832,220.00 |
| Neurosurgery            | 768,340.80   | 1,148,616.00 | 1,956,889.00 | 2,148,264.00 | 880,115.20   | 954,229.30   | 1,090,613.00 | 661,140.50   | 684,117.00   | 699,007.20   |
| Obstetrics and Gynecol  | 1,693,429.00 | 1,003,004.00 | 651,969.90   | 846,932.70   | 2,061,479.00 | 749,891.80   | 549,367.70   | 1,023,898.00 | 893,043.90   | 769,562.20   |
| Ophthalmology           | 586,612.20   | 350,067.90   | 387,425.60   | 271,115.80   | 593,446.80   | 745,473.40   | 645,930.80   | 615,781.70   | 567,401.30   | 992,640.80   |
| Orthopedics             | -            | -            | 521,639.00   | 328,701.50   | 196,680.00   | 196,680.00   | -            | -            | 705,076.00   | 648,512.00   |
| Otolaryngology          | 353,177.20   | 207,493.50   | 380,567.70   | 262,256.00   | 870,422.00   | 799,632.30   | 725,323.20   | 805,466.80   | 537,763.50   | 777,554.20   |
| Pathology               | 838,184.80   | 549,637.20   | 591,787.10   | 595,558.00   | 677,260.50   | 776,469.70   | 845,671.50   | 929,243.10   | 787,017.40   | 869,787.10   |
| Pediatrics              | 754,255.50   | 776,144.10   | 785,361.80   | 842,353.10   | 758,205.50   | 825,554.30   | 779,608.50   | 799,393.60   | 745,582.70   | 671,752.30   |
| Physical Medicine & Rel | 142,161.00   | 207,461.00   | 542,662.10   | 497,752.60   | 486,371.40   | 724,539.40   | 714,931.60   | 323,280.20   | 1,693,692.00 | 2,602,043.00 |
| Plastic Surgery         | -            | -            | -            | -            | -            | -            | -            | 430          |              |              |





## Appendices

### Appendix I: NIH institutes and centers

NIH centers and institutes are: National Cancer Institute (NCI), National Eye Institute (NEI), National Heart, Lung, and Blood Institute (NHLBI), National Human Genome Research Institute (NHGRI), National Institute on Aging (NIA), National Institute on Alcohol Abuse and Alcoholism (NIAAA), National Institute of Allergy and Infectious Diseases (NIAID), National Institute of Arthritis and Musculoskeletal and Skin Diseases (NIAMS), National Institute of Biomedical Imaging and Bioengineering (NIBIB), National Institute of Child Health and Human Development (NICHD), National Institute on Deafness and Other Communication Disorders (NIDCD), National Institute of Dental and Craniofacial Research (NIDCR), National Institute of Diabetes and Digestive and Kidney Diseases (NIDDK), National Institute on Drug Abuse (NIDA), National Institute of Environmental Health Sciences (NIEHS), National Institute of General Medical Sciences (NIGMS), National Institute of Mental Health (NIMH), National Institute on Minority Health and Health Disparities (NIMHHD), National Institute of Neurological Disorders and Stroke (NINDS), National Institute of Nursing Research (NINR), National Library of Medicine (NLM), Center for Information Technology (CIT), Center for Scientific Review (CSR), Fogarty International Center (FIC), National Center for Advancing Translational Sciences (NCATS), National Center for Complementary and Integrative Health (NCCIH) and the NIH Clinical Center (NIH CC).

**Appendix II: NIH Grants included in the analysis**

Grants included in the analysis are: C06, D43, D71, DP1, DP2, DP3, DP5, DP7, F05, F30, F31, F32, F33, F99, G08, G11, G12, G13, G20, H25, H79, K00, K01, K02, K05, K06, K07, K08, K12, K18, K22, K23, K24, K25, K26, K30, K38, K76, K99, KL1, KL2, M01, N01, OT2, OT3, P01, P20, P2C, P30, P40, P41, P42, P50, P51, P60, PL1, PN2, R00, R01, R03, R13, R15, R18, R21, R24, R25, R33, R34, R35, R36, R37, R38, R49, R50, R55, R56, R61, R90, RC2, RC4, RF1, RL1, RL5, RL9, RM1, S10, S21, SC1, SC2, SC3, T01, T03, T15, T32, T34, T35, T36, T37, T42, T90, TL1, U01, U10, U13, U18, U19, U24, U2C, U2G, U2R, U34, U38, U41, U42, U45, U47, U48, U49, U50, U51, U52, U54, U56, U58, U59, U60, U62, U65, U79, U90, UC2, UC4, UC7, UD1, UE5, UF1, UG1, UG3, UH2, UH3, UH4, UL1, UM1, UM2, UR3, and UR6.

**Appendix III: Number of active physicians from 2010-2020 by specialty**

| Specialty      | Year | Number of physicians |
|----------------|------|----------------------|
| Anesthesiology | 2010 | 40123                |
| Anesthesiology | 2011 | 40335                |
| Anesthesiology | 2012 | 40546                |
| Anesthesiology | 2013 | 40758                |
| Anesthesiology | 2014 | 41055                |
| Anesthesiology | 2015 | 41351                |
| Anesthesiology | 2016 | 41557                |
| Anesthesiology | 2017 | 41762                |
| Anesthesiology | 2018 | 42015                |
| Anesthesiology | 2019 | 42267                |
| Anesthesiology | 2020 | 42267                |
| Dermatology    | 2010 | 10820                |
| Dermatology    | 2011 | 11001                |
| Dermatology    | 2012 | 11182                |
| Dermatology    | 2013 | 11363                |
| Dermatology    | 2014 | 11535                |
| Dermatology    | 2015 | 11706                |
| Dermatology    | 2016 | 11879                |
| Dermatology    | 2017 | 12051                |
| Dermatology    | 2018 | 12284                |
| Dermatology    | 2019 | 12516                |
| Dermatology    | 2020 | 12516                |

|                            |      |        |
|----------------------------|------|--------|
| Emergency Medicine         | 2010 | 33984  |
| Emergency Medicine         | 2011 | 35070  |
| Emergency Medicine         | 2012 | 36155  |
| Emergency Medicine         | 2013 | 37241  |
| Emergency Medicine         | 2014 | 38410  |
| Emergency Medicine         | 2015 | 39579  |
| Emergency Medicine         | 2016 | 40964  |
| Emergency Medicine         | 2017 | 42348  |
| Emergency Medicine         | 2018 | 43775  |
| Emergency Medicine         | 2019 | 45202  |
| Emergency Medicine         | 2020 | 45202  |
| Family Medicine            | 2010 | 106549 |
| Family Medicine            | 2011 | 107338 |
| Family Medicine            | 2012 | 108128 |
| Family Medicine            | 2013 | 108917 |
| Family Medicine            | 2014 | 110106 |
| Family Medicine            | 2015 | 111295 |
| Family Medicine            | 2016 | 112405 |
| Family Medicine            | 2017 | 113514 |
| Family Medicine            | 2018 | 115856 |
| Family Medicine            | 2019 | 118198 |
| Family Medicine            | 2020 | 118198 |
| Internal Medicine/Medicine | 2010 | 109048 |
| Internal Medicine/Medicine | 2011 | 109714 |
| Internal Medicine/Medicine | 2012 | 110381 |
| Internal Medicine/Medicine | 2013 | 111047 |
| Internal Medicine/Medicine | 2014 | 112568 |
| Internal Medicine/Medicine | 2015 | 114089 |
| Internal Medicine/Medicine | 2016 | 114823 |
| Internal Medicine/Medicine | 2017 | 115557 |

|                            |      |        |
|----------------------------|------|--------|
| Internal Medicine/Medicine | 2018 | 117864 |
| Internal Medicine/Medicine | 2019 | 120171 |
| Internal Medicine/Medicine | 2020 | 120171 |
| Neurology                  | 2010 | 12916  |
| Neurology                  | 2011 | 12996  |
| Neurology                  | 2012 | 13076  |
| Neurology                  | 2013 | 13156  |
| Neurology                  | 2014 | 13274  |
| Neurology                  | 2015 | 13392  |
| Neurology                  | 2016 | 13555  |
| Neurology                  | 2017 | 13717  |
| Neurology                  | 2018 | 13932  |
| Neurology                  | 2019 | 14146  |
| Neurology                  | 2020 | 14146  |
| Neurosurgery               | 2010 | 5047   |
| Neurosurgery               | 2011 | 5088   |
| Neurosurgery               | 2012 | 5130   |
| Neurosurgery               | 2013 | 5171   |
| Neurosurgery               | 2014 | 5259   |
| Neurosurgery               | 2015 | 5346   |
| Neurosurgery               | 2016 | 5439   |
| Neurosurgery               | 2017 | 5531   |
| Neurosurgery               | 2018 | 5640   |
| Neurosurgery               | 2019 | 5748   |
| Neurosurgery               | 2020 | 5748   |
| Obstetrics & Gynecology    | 2010 | 40377  |
| Obstetrics & Gynecology    | 2011 | 40527  |
| Obstetrics & Gynecology    | 2012 | 40676  |
| Obstetrics & Gynecology    | 2013 | 40826  |
| Obstetrics & Gynecology    | 2014 | 41154  |
| Obstetrics & Gynecology    | 2015 | 41481  |

|                         |      |       |
|-------------------------|------|-------|
| Obstetrics & Gynecology | 2016 | 41569 |
| Obstetrics & Gynecology | 2017 | 41656 |
| Obstetrics & Gynecology | 2018 | 42188 |
| Obstetrics & Gynecology | 2019 | 42720 |
| Obstetrics & Gynecology | 2020 | 42720 |
| Ophthalmology           | 2010 | 17943 |
| Ophthalmology           | 2011 | 18068 |
| Ophthalmology           | 2012 | 18192 |
| Ophthalmology           | 2013 | 18317 |
| Ophthalmology           | 2014 | 18455 |
| Ophthalmology           | 2015 | 18593 |
| Ophthalmology           | 2016 | 18705 |
| Ophthalmology           | 2017 | 18817 |
| Ophthalmology           | 2018 | 19065 |
| Ophthalmology           | 2019 | 19312 |
| Ophthalmology           | 2020 | 19312 |
| Orthopedics             | 2010 | 19822 |
| Orthopedics             | 2011 | 19673 |
| Orthopedics             | 2012 | 19523 |
| Orthopedics             | 2013 | 19374 |
| Orthopedics             | 2014 | 19260 |
| Orthopedics             | 2015 | 19145 |
| Orthopedics             | 2016 | 19073 |
| Orthopedics             | 2017 | 19001 |
| Orthopedics             | 2018 | 19035 |
| Orthopedics             | 2019 | 19069 |
| Orthopedics             | 2020 | 19069 |
| Otolaryngology          | 2010 | 9232  |
| Otolaryngology          | 2011 | 9261  |
| Otolaryngology          | 2012 | 9291  |
| Otolaryngology          | 2013 | 9320  |
| Otolaryngology          | 2014 | 9366  |
| Otolaryngology          | 2015 | 9411  |
| Otolaryngology          | 2016 | 9469  |
| Otolaryngology          | 2017 | 9526  |

|                           |      |       |
|---------------------------|------|-------|
| Otolaryngology            | 2018 | 9652  |
| Otolaryngology            | 2019 | 9777  |
| Otolaryngology            | 2020 | 9777  |
| Pathology                 | 2010 | 14975 |
| Pathology                 | 2011 | 14553 |
| Pathology                 | 2012 | 14132 |
| Pathology                 | 2013 | 13710 |
| Pathology                 | 2014 | 13498 |
| Pathology                 | 2015 | 13286 |
| Pathology                 | 2016 | 13063 |
| Pathology                 | 2017 | 12839 |
| Pathology                 | 2018 | 12741 |
| Pathology                 | 2019 | 12643 |
| Pathology                 | 2020 | 12643 |
| Pediatrics                | 2010 | 55509 |
| Pediatrics                | 2011 | 55760 |
| Pediatrics                | 2012 | 56011 |
| Pediatrics                | 2013 | 56262 |
| Pediatrics                | 2014 | 56903 |
| Pediatrics                | 2015 | 57543 |
| Pediatrics                | 2016 | 57989 |
| Pediatrics                | 2017 | 58435 |
| Pediatrics                | 2018 | 59527 |
| Pediatrics                | 2019 | 60618 |
| Pediatrics                | 2020 | 60618 |
| Physical Medicine & Rehab | 2010 | 8503  |
| Physical Medicine & Rehab | 2011 | 8637  |
| Physical Medicine & Rehab | 2012 | 8772  |
| Physical Medicine & Rehab | 2013 | 8906  |
| Physical Medicine & Rehab | 2014 | 9035  |
| Physical Medicine & Rehab | 2015 | 9164  |
| Physical Medicine & Rehab | 2016 | 9254  |
| Physical Medicine & Rehab | 2017 | 9343  |
| Physical Medicine & Rehab | 2018 | 9555  |
| Physical Medicine & Rehab | 2019 | 9767  |



|                               |      |       |
|-------------------------------|------|-------|
| Physical Medicine & Rehab     | 2020 | 9767  |
| Plastic Surgery               | 2010 | 6822  |
| Plastic Surgery               | 2011 | 6862  |
| Plastic Surgery               | 2012 | 6902  |
| Plastic Surgery               | 2013 | 6942  |
| Plastic Surgery               | 2014 | 6981  |
| Plastic Surgery               | 2015 | 7020  |
| Plastic Surgery               | 2016 | 7081  |
| Plastic Surgery               | 2017 | 7142  |
| Plastic Surgery               | 2018 | 7230  |
| Plastic Surgery               | 2019 | 7317  |
| Plastic Surgery               | 2020 | 7317  |
| Psychiatry                    | 2010 | 38289 |
| Psychiatry                    | 2011 | 37958 |
| Psychiatry                    | 2012 | 37627 |
| Psychiatry                    | 2013 | 37296 |
| Psychiatry                    | 2014 | 37516 |
| Psychiatry                    | 2015 | 37736 |
| Psychiatry                    | 2016 | 37971 |
| Psychiatry                    | 2017 | 38205 |
| Psychiatry                    | 2018 | 38499 |
| Psychiatry                    | 2019 | 38792 |
| Psychiatry                    | 2020 | 38792 |
| Radiation-Diagnostic/Oncology | 2010 | 32445 |
| Radiation-Diagnostic/Oncology | 2011 | 34213 |
| Radiation-Diagnostic/Oncology | 2012 | 35982 |
| Radiation-Diagnostic/Oncology | 2013 | 37750 |
| Radiation-Diagnostic/Oncology | 2014 | 38191 |
| Radiation-Diagnostic/Oncology | 2015 | 38632 |
| Radiation-Diagnostic/Oncology | 2016 | 39239 |
| Radiation-Diagnostic/Oncology | 2017 | 39846 |

1  
2  
3  
4  
5  
6  
7  
8  
9  
10  
11  
12  
13  
14  
15  
16  
17  
18  
19  
20  
21  
22  
23  
24  
25  
26  
27  
28  
29  
30  
31  
32  
33  
34  
35  
36  
37  
38  
39  
40  
41  
42  
43  
44  
45  
46  
47  
48  
49  
50  
51  
52  
53  
54  
55  
56  
57  
58  
59  
60

|                               |      |       |
|-------------------------------|------|-------|
| Radiation-Diagnostic/Oncology | 2018 | 40572 |
| Radiation-Diagnostic/Oncology | 2019 | 41297 |
| Radiation-Diagnostic/Oncology | 2020 | 41297 |

For peer review only

|         |      |       |
|---------|------|-------|
| Surgery | 2010 | 26314 |
| Surgery | 2011 | 25938 |
| Surgery | 2012 | 25563 |
| Surgery | 2013 | 25187 |
| Surgery | 2014 | 25221 |
| Surgery | 2015 | 25254 |
| Surgery | 2016 | 25148 |
| Surgery | 2017 | 25042 |
| Surgery | 2018 | 25303 |
| Surgery | 2019 | 25564 |
| Surgery | 2020 | 25564 |
| Urology | 2010 | 9826  |
| Urology | 2011 | 9808  |
| Urology | 2012 | 9789  |
| Urology | 2013 | 9771  |
| Urology | 2014 | 9790  |
| Urology | 2015 | 9808  |
| Urology | 2016 | 9865  |
| Urology | 2017 | 9921  |
| Urology | 2018 | 10061 |
| Urology | 2019 | 10201 |
| Urology | 2020 | 10201 |

**Appendix IV: 10 most commonly awarded grant-types from 2011-2020**

| Grant-type | Title                                                       | Description                                                                                                                                                                                                                                                                                                                                                                         |
|------------|-------------------------------------------------------------|-------------------------------------------------------------------------------------------------------------------------------------------------------------------------------------------------------------------------------------------------------------------------------------------------------------------------------------------------------------------------------------|
| F32        | Postdoctoral Individual National Research Service Award     | To provide postdoctoral research training to individuals to broaden their scientific background and extend their potential for research in specified health-related areas.                                                                                                                                                                                                          |
| T32        | Institutional National Research Service Award               | To enable institutions to make National Research Service Awards to individuals selected by them for predoctoral and postdoctoral research training in specified shortage areas.                                                                                                                                                                                                     |
| K01        | Research Scientist Development Award - Research & Training  | For support of a scientist, committed to research, in need of both advanced research training and additional experience.                                                                                                                                                                                                                                                            |
| K08        | Clinical Investigator Award (CIA)                           | To provide the opportunity for promising medical scientists with demonstrated aptitude to develop into independent investigators, or for faculty members to pursue research aspects of categorical areas applicable to the awarding unit, and aid in filling the academic faculty gap in these shortage areas within health profession's institutions of the country.               |
| K23        | Mentored Patient-Oriented Research Career Development Award | To provide support for the career development of investigators who have made a commitment to focus their research endeavors on patient-oriented research. This mechanism provides support for a 3 year minimum up to 5 year period of supervised study and research for clinically trained professionals who have the potential to develop into productive, clinical investigators. |
| R01        | Research Project                                            | To support a discrete, specified, circumscribed project to be performed by the named investigator(s) in an area representing his or her specific interest and competencies                                                                                                                                                                                                          |
| R03        | Small Research Grants                                       | To provide research support specifically limited in time and amount for studies in categorical program areas. Small grants provide flexibility for initiating studies which are generally for preliminary short-term projects and are non-renewable.                                                                                                                                |
| R21        | Exploratory/Developmental Grants                            | To encourage the development of new research activities in categorical program areas. (Support generally is restricted in level of support and in time.)                                                                                                                                                                                                                            |
| P30        | Center Core Grants                                          | To support shared resources and facilities for categorical research by a number of investigators from different disciplines who provide a                                                                                                                                                                                                                                           |

|     |                                              |                                                                                                                                                                                                                                                                                                                                                                                                                  |
|-----|----------------------------------------------|------------------------------------------------------------------------------------------------------------------------------------------------------------------------------------------------------------------------------------------------------------------------------------------------------------------------------------------------------------------------------------------------------------------|
|     |                                              | multidisciplinary approach to a joint research effort or from the same discipline who focus on a common research problem. The core grant is integrated with the center's component projects or program projects, though funded independently from them. This support, by providing more accessible resources, is expected to assure a greater productivity than from the separate projects and program projects. |
| U01 | Research Project--<br>Cooperative Agreements | To support a discrete, specified, circumscribed project to be performed by the named investigator(s) in an area representing his or her specific interest and competencies.                                                                                                                                                                                                                                      |
