# Supplementary material for: Does NIH funding differ between medical specialties? A longitudinal analysis of NIH grant data by specialty and type of grant, 2011–2020
Source: PubMed Central journal article supplement — BMJ Open. 2022 Dec 29;12(12):e058191. doi: 10.1136/bmjopen-2021-058191 (PMC9809243; doi:10.1136/bmjopen-2021-058191), 2022-12-29
Supplement: bmjopen-2021-058191supp001.pdf [file bmjopen-2021-058191supp001.pdf]

## Appendices

### Appendix I: NIH institutes and centers

NIH centers and institutes are: National Cancer Institute (NCI), National Eye Institute (NEI), National Heart, Lung, and Blood Institute (NHLBI), National Human Genome Research Institute (NHGRI), National Institute on Aging (NIA), National Institute on Alcohol Abuse and Alcoholism (NIAAA), National Institute of Allergy and Infectious Diseases (NIAID), National Institute of Arthritis and Musculoskeletal and Skin Diseases (NIAMS), National Institute of Biomedical Imaging and Bioengineering (NIBIB), National Institute of Child Health and Human Development (NICHD), National Institute on Deafness and Other Communication Disorders (NIDCD), National Institute of Dental and Craniofacial Research (NIDCR), National Institute of Diabetes and Digestive and Kidney Diseases (NIDDK), National Institute on Drug Abuse (NIDA), National Institute of Environmental Health Sciences (NIEHS), National Institute of General Medical Sciences (NIGMS), National Institute of Mental Health (NIMH), National Institute on Minority Health and Health Disparities (NIMHHD), National Institute of Neurological Disorders and Stroke (NINDS), National Institute of Nursing Research (NINR), National Library of Medicine (NLM), Center for Information Technology (CIT), Center for Scientific Review (CSR), Fogarty International Center (FIC), National Center for Advancing Translational Sciences (NCATS), National Center for Complementary and Integrative Health (NCCIH) and the NIH Clinical Center (NIH CC).

**Appendix II: NIH Grants included in the analysis**

Grants included in the analysis are: C06, D43, D71, DP1, DP2, DP3, DP5, DP7, F05, F30, F31, F32, F33, F99, G08, G11, G12, G13, G20, H25, H79, K00, K01, K02, K05, K06, K07, K08, K12, K18, K22, K23, K24, K25, K26, K30, K38, K76, K99, KL1, KL2, M01, N01, OT2, OT3, P01, P20, P2C, P30, P40, P41, P42, P50, P51, P60, PL1, PN2, R00, R01, R03, R13, R15, R18, R21, R24, R25, R33, R34, R35, R36, R37, R38, R49, R50, R55, R56, R61, R90, RC2, RC4, RF1, RL1, RL5, RL9, RM1, S10, S21, SC1, SC2, SC3, T01, T03, T15, T32, T34, T35, T36, T37, T42, T90, TL1, U01, U10, U13, U18, U19, U24, U2C, U2G, U2R, U34, U38, U41, U42, U45, U47, U48, U49, U50, U51, U52, U54, U56, U58, U59, U60, U62, U65, U79, U90, UC2, UC4, UC7, UD1, UE5, UF1, UG1, UG3, UH2, UH3, UH4, UL1, UM1, UM2, UR3, and UR6.

**Appendix III: Number of active physicians from 2010-2020 by specialty**

| <b>Specialty</b> | <b>Year</b> | <b>Number of physicians</b> |
|------------------|-------------|-----------------------------|
| Anesthesiology   | 2010        | 40123                       |
| Anesthesiology   | 2011        | 40335                       |
| Anesthesiology   | 2012        | 40546                       |
| Anesthesiology   | 2013        | 40758                       |
| Anesthesiology   | 2014        | 41055                       |
| Anesthesiology   | 2015        | 41351                       |
| Anesthesiology   | 2016        | 41557                       |
| Anesthesiology   | 2017        | 41762                       |
| Anesthesiology   | 2018        | 42015                       |
| Anesthesiology   | 2019        | 42267                       |
| Anesthesiology   | 2020        | 42267                       |
| Dermatology      | 2010        | 10820                       |
| Dermatology      | 2011        | 11001                       |
| Dermatology      | 2012        | 11182                       |
| Dermatology      | 2013        | 11363                       |
| Dermatology      | 2014        | 11535                       |
| Dermatology      | 2015        | 11706                       |
| Dermatology      | 2016        | 11879                       |
| Dermatology      | 2017        | 12051                       |
| Dermatology      | 2018        | 12284                       |
| Dermatology      | 2019        | 12516                       |
| Dermatology      | 2020        | 12516                       |

|                            |      |        |
|----------------------------|------|--------|
| Emergency Medicine         | 2010 | 33984  |
| Emergency Medicine         | 2011 | 35070  |
| Emergency Medicine         | 2012 | 36155  |
| Emergency Medicine         | 2013 | 37241  |
| Emergency Medicine         | 2014 | 38410  |
| Emergency Medicine         | 2015 | 39579  |
| Emergency Medicine         | 2016 | 40964  |
| Emergency Medicine         | 2017 | 42348  |
| Emergency Medicine         | 2018 | 43775  |
| Emergency Medicine         | 2019 | 45202  |
| Emergency Medicine         | 2020 | 45202  |
| Family Medicine            | 2010 | 106549 |
| Family Medicine            | 2011 | 107338 |
| Family Medicine            | 2012 | 108128 |
| Family Medicine            | 2013 | 108917 |
| Family Medicine            | 2014 | 110106 |
| Family Medicine            | 2015 | 111295 |
| Family Medicine            | 2016 | 112405 |
| Family Medicine            | 2017 | 113514 |
| Family Medicine            | 2018 | 115856 |
| Family Medicine            | 2019 | 118198 |
| Family Medicine            | 2020 | 118198 |
| Internal Medicine/Medicine | 2010 | 109048 |
| Internal Medicine/Medicine | 2011 | 109714 |
| Internal Medicine/Medicine | 2012 | 110381 |
| Internal Medicine/Medicine | 2013 | 111047 |
| Internal Medicine/Medicine | 2014 | 112568 |
| Internal Medicine/Medicine | 2015 | 114089 |
| Internal Medicine/Medicine | 2016 | 114823 |
| Internal Medicine/Medicine | 2017 | 115557 |

|                            |      |        |
|----------------------------|------|--------|
| Internal Medicine/Medicine | 2018 | 117864 |
| Internal Medicine/Medicine | 2019 | 120171 |
| Internal Medicine/Medicine | 2020 | 120171 |
| Neurology                  | 2010 | 12916  |
| Neurology                  | 2011 | 12996  |
| Neurology                  | 2012 | 13076  |
| Neurology                  | 2013 | 13156  |
| Neurology                  | 2014 | 13274  |
| Neurology                  | 2015 | 13392  |
| Neurology                  | 2016 | 13555  |
| Neurology                  | 2017 | 13717  |
| Neurology                  | 2018 | 13932  |
| Neurology                  | 2019 | 14146  |
| Neurology                  | 2020 | 14146  |
| Neurosurgery               | 2010 | 5047   |
| Neurosurgery               | 2011 | 5088   |
| Neurosurgery               | 2012 | 5130   |
| Neurosurgery               | 2013 | 5171   |
| Neurosurgery               | 2014 | 5259   |
| Neurosurgery               | 2015 | 5346   |
| Neurosurgery               | 2016 | 5439   |
| Neurosurgery               | 2017 | 5531   |
| Neurosurgery               | 2018 | 5640   |
| Neurosurgery               | 2019 | 5748   |
| Neurosurgery               | 2020 | 5748   |
| Obstetrics & Gynecology    | 2010 | 40377  |
| Obstetrics & Gynecology    | 2011 | 40527  |
| Obstetrics & Gynecology    | 2012 | 40676  |
| Obstetrics & Gynecology    | 2013 | 40826  |
| Obstetrics & Gynecology    | 2014 | 41154  |
| Obstetrics & Gynecology    | 2015 | 41481  |

|                         |      |       |
|-------------------------|------|-------|
| Obstetrics & Gynecology | 2016 | 41569 |
| Obstetrics & Gynecology | 2017 | 41656 |
| Obstetrics & Gynecology | 2018 | 42188 |
| Obstetrics & Gynecology | 2019 | 42720 |
| Obstetrics & Gynecology | 2020 | 42720 |
| Ophthalmology           | 2010 | 17943 |
| Ophthalmology           | 2011 | 18068 |
| Ophthalmology           | 2012 | 18192 |
| Ophthalmology           | 2013 | 18317 |
| Ophthalmology           | 2014 | 18455 |
| Ophthalmology           | 2015 | 18593 |
| Ophthalmology           | 2016 | 18705 |
| Ophthalmology           | 2017 | 18817 |
| Ophthalmology           | 2018 | 19065 |
| Ophthalmology           | 2019 | 19312 |
| Ophthalmology           | 2020 | 19312 |
| Orthopedics             | 2010 | 19822 |
| Orthopedics             | 2011 | 19673 |
| Orthopedics             | 2012 | 19523 |
| Orthopedics             | 2013 | 19374 |
| Orthopedics             | 2014 | 19260 |
| Orthopedics             | 2015 | 19145 |
| Orthopedics             | 2016 | 19073 |
| Orthopedics             | 2017 | 19001 |
| Orthopedics             | 2018 | 19035 |
| Orthopedics             | 2019 | 19069 |
| Orthopedics             | 2020 | 19069 |
| Otolaryngology          | 2010 | 9232  |
| Otolaryngology          | 2011 | 9261  |
| Otolaryngology          | 2012 | 9291  |
| Otolaryngology          | 2013 | 9320  |
| Otolaryngology          | 2014 | 9366  |
| Otolaryngology          | 2015 | 9411  |
| Otolaryngology          | 2016 | 9469  |
| Otolaryngology          | 2017 | 9526  |

|                           |      |       |
|---------------------------|------|-------|
| Otolaryngology            | 2018 | 9652  |
| Otolaryngology            | 2019 | 9777  |
| Otolaryngology            | 2020 | 9777  |
| Pathology                 | 2010 | 14975 |
| Pathology                 | 2011 | 14553 |
| Pathology                 | 2012 | 14132 |
| Pathology                 | 2013 | 13710 |
| Pathology                 | 2014 | 13498 |
| Pathology                 | 2015 | 13286 |
| Pathology                 | 2016 | 13063 |
| Pathology                 | 2017 | 12839 |
| Pathology                 | 2018 | 12741 |
| Pathology                 | 2019 | 12643 |
| Pathology                 | 2020 | 12643 |
| Pediatrics                | 2010 | 55509 |
| Pediatrics                | 2011 | 55760 |
| Pediatrics                | 2012 | 56011 |
| Pediatrics                | 2013 | 56262 |
| Pediatrics                | 2014 | 56903 |
| Pediatrics                | 2015 | 57543 |
| Pediatrics                | 2016 | 57989 |
| Pediatrics                | 2017 | 58435 |
| Pediatrics                | 2018 | 59527 |
| Pediatrics                | 2019 | 60618 |
| Pediatrics                | 2020 | 60618 |
| Physical Medicine & Rehab | 2010 | 8503  |
| Physical Medicine & Rehab | 2011 | 8637  |
| Physical Medicine & Rehab | 2012 | 8772  |
| Physical Medicine & Rehab | 2013 | 8906  |
| Physical Medicine & Rehab | 2014 | 9035  |
| Physical Medicine & Rehab | 2015 | 9164  |
| Physical Medicine & Rehab | 2016 | 9254  |
| Physical Medicine & Rehab | 2017 | 9343  |
| Physical Medicine & Rehab | 2018 | 9555  |
| Physical Medicine & Rehab | 2019 | 9767  |

|                               |      |       |
|-------------------------------|------|-------|
| Physical Medicine & Rehab     | 2020 | 9767  |
| Plastic Surgery               | 2010 | 6822  |
| Plastic Surgery               | 2011 | 6862  |
| Plastic Surgery               | 2012 | 6902  |
| Plastic Surgery               | 2013 | 6942  |
| Plastic Surgery               | 2014 | 6981  |
| Plastic Surgery               | 2015 | 7020  |
| Plastic Surgery               | 2016 | 7081  |
| Plastic Surgery               | 2017 | 7142  |
| Plastic Surgery               | 2018 | 7230  |
| Plastic Surgery               | 2019 | 7317  |
| Plastic Surgery               | 2020 | 7317  |
| Psychiatry                    | 2010 | 38289 |
| Psychiatry                    | 2011 | 37958 |
| Psychiatry                    | 2012 | 37627 |
| Psychiatry                    | 2013 | 37296 |
| Psychiatry                    | 2014 | 37516 |
| Psychiatry                    | 2015 | 37736 |
| Psychiatry                    | 2016 | 37971 |
| Psychiatry                    | 2017 | 38205 |
| Psychiatry                    | 2018 | 38499 |
| Psychiatry                    | 2019 | 38792 |
| Psychiatry                    | 2020 | 38792 |
| Radiation-Diagnostic/Oncology | 2010 | 32445 |
| Radiation-Diagnostic/Oncology | 2011 | 34213 |
| Radiation-Diagnostic/Oncology | 2012 | 35982 |
| Radiation-Diagnostic/Oncology | 2013 | 37750 |
| Radiation-Diagnostic/Oncology | 2014 | 38191 |
| Radiation-Diagnostic/Oncology | 2015 | 38632 |
| Radiation-Diagnostic/Oncology | 2016 | 39239 |
| Radiation-Diagnostic/Oncology | 2017 | 39846 |



|                               |      |       |
|-------------------------------|------|-------|
| Radiation-Diagnostic/Oncology | 2018 | 40572 |
| Radiation-Diagnostic/Oncology | 2019 | 41297 |
| Radiation-Diagnostic/Oncology | 2020 | 41297 |

|         |      |       |
|---------|------|-------|
| Surgery | 2010 | 26314 |
| Surgery | 2011 | 25938 |
| Surgery | 2012 | 25563 |
| Surgery | 2013 | 25187 |
| Surgery | 2014 | 25221 |
| Surgery | 2015 | 25254 |
| Surgery | 2016 | 25148 |
| Surgery | 2017 | 25042 |
| Surgery | 2018 | 25303 |
| Surgery | 2019 | 25564 |
| Surgery | 2020 | 25564 |
| Urology | 2010 | 9826  |
| Urology | 2011 | 9808  |
| Urology | 2012 | 9789  |
| Urology | 2013 | 9771  |
| Urology | 2014 | 9790  |
| Urology | 2015 | 9808  |
| Urology | 2016 | 9865  |
| Urology | 2017 | 9921  |
| Urology | 2018 | 10061 |
| Urology | 2019 | 10201 |
| Urology | 2020 | 10201 |

**Appendix IV: 10 most commonly awarded grant-types from 2011-2020**

| <b>Grant-type</b> | <b>Title</b>                                                | <b>Description</b>                                                                                                                                                                                                                                                                                                                                                                  |
|-------------------|-------------------------------------------------------------|-------------------------------------------------------------------------------------------------------------------------------------------------------------------------------------------------------------------------------------------------------------------------------------------------------------------------------------------------------------------------------------|
| F32               | Postdoctoral Individual National Research Service Award     | To provide postdoctoral research training to individuals to broaden their scientific background and extend their potential for research in specified health-related areas.                                                                                                                                                                                                          |
| T32               | Institutional National Research Service Award               | To enable institutions to make National Research Service Awards to individuals selected by them for predoctoral and postdoctoral research training in specified shortage areas.                                                                                                                                                                                                     |
| K01               | Research Scientist Development Award - Research & Training  | For support of a scientist, committed to research, in need of both advanced research training and additional experience.                                                                                                                                                                                                                                                            |
| K08               | Clinical Investigator Award (CIA)                           | To provide the opportunity for promising medical scientists with demonstrated aptitude to develop into independent investigators, or for faculty members to pursue research aspects of categorical areas applicable to the awarding unit, and aid in filling the academic faculty gap in these shortage areas within health profession's institutions of the country.               |
| K23               | Mentored Patient-Oriented Research Career Development Award | To provide support for the career development of investigators who have made a commitment to focus their research endeavors on patient-oriented research. This mechanism provides support for a 3 year minimum up to 5 year period of supervised study and research for clinically trained professionals who have the potential to develop into productive, clinical investigators. |
| R01               | Research Project                                            | To support a discrete, specified, circumscribed project to be performed by the named investigator(s) in an area representing his or her specific interest and competencies                                                                                                                                                                                                          |
| R03               | Small Research Grants                                       | To provide research support specifically limited in time and amount for studies in categorical program areas. Small grants provide flexibility for initiating studies which are generally for preliminary short-term projects and are non-renewable.                                                                                                                                |
| R21               | Exploratory/Developmental Grants                            | To encourage the development of new research activities in categorical program areas. (Support generally is restricted in level of support and in time.)                                                                                                                                                                                                                            |
| P30               | Center Core Grants                                          | To support shared resources and facilities for categorical research by a number of investigators from different disciplines who provide a                                                                                                                                                                                                                                           |

|     |                                              |                                                                                                                                                                                                                                                                                                                                                                                                                         |
|-----|----------------------------------------------|-------------------------------------------------------------------------------------------------------------------------------------------------------------------------------------------------------------------------------------------------------------------------------------------------------------------------------------------------------------------------------------------------------------------------|
|     |                                              | <p>multidisciplinary approach to a joint research effort or from the same discipline who focus on a common research problem. The core grant is integrated with the center's component projects or program projects, though funded independently from them. This support, by providing more accessible resources, is expected to assure a greater productivity than from the separate projects and program projects.</p> |
| U01 | Research Project--<br>Cooperative Agreements | <p>To support a discrete, specified, circumscribed project to be performed by the named investigator(s) in an area representing his or her specific interest and competencies.</p>                                                                                                                                                                                                                                      |
