# Supplementary material for: Does NIH funding differ between medical specialties? A longitudinal analysis of NIH grant data by specialty and type of grant, 2011–2020
Source: PubMed Central journal article supplement — BMJ Open. 2022 Dec 29;12(12):e058191. doi: 10.1136/bmjopen-2021-058191 (PMC9809243; doi:10.1136/bmjopen-2021-058191), 2022-12-29

Number of all Grants awarded per year by specialty

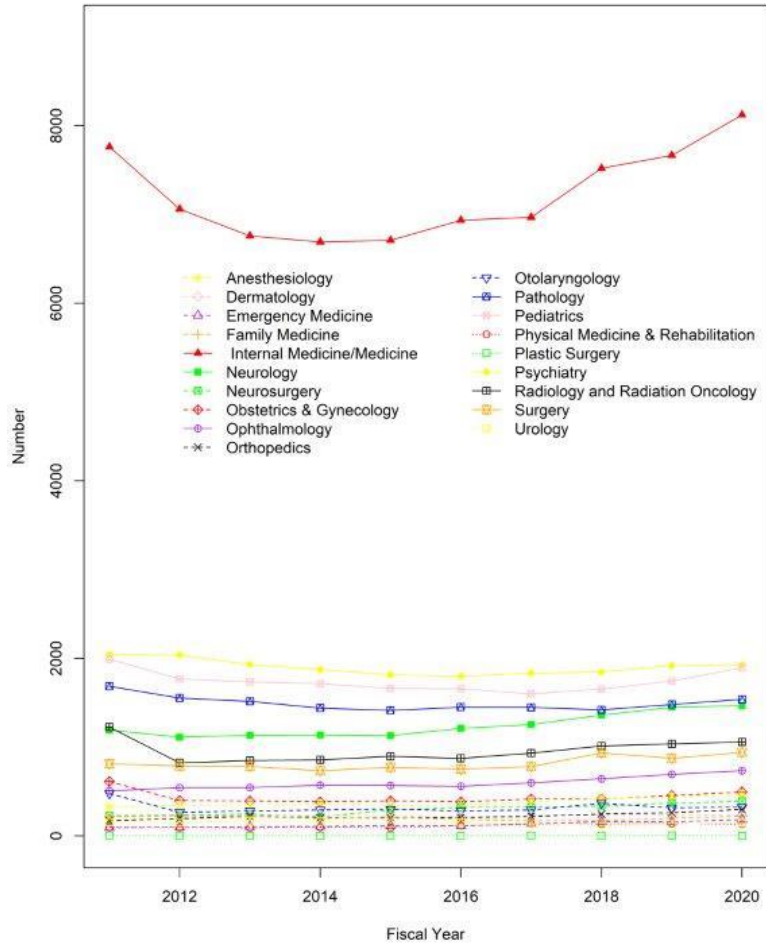

Number of all Grants awarded per year by specialty (without Internal Medicine)

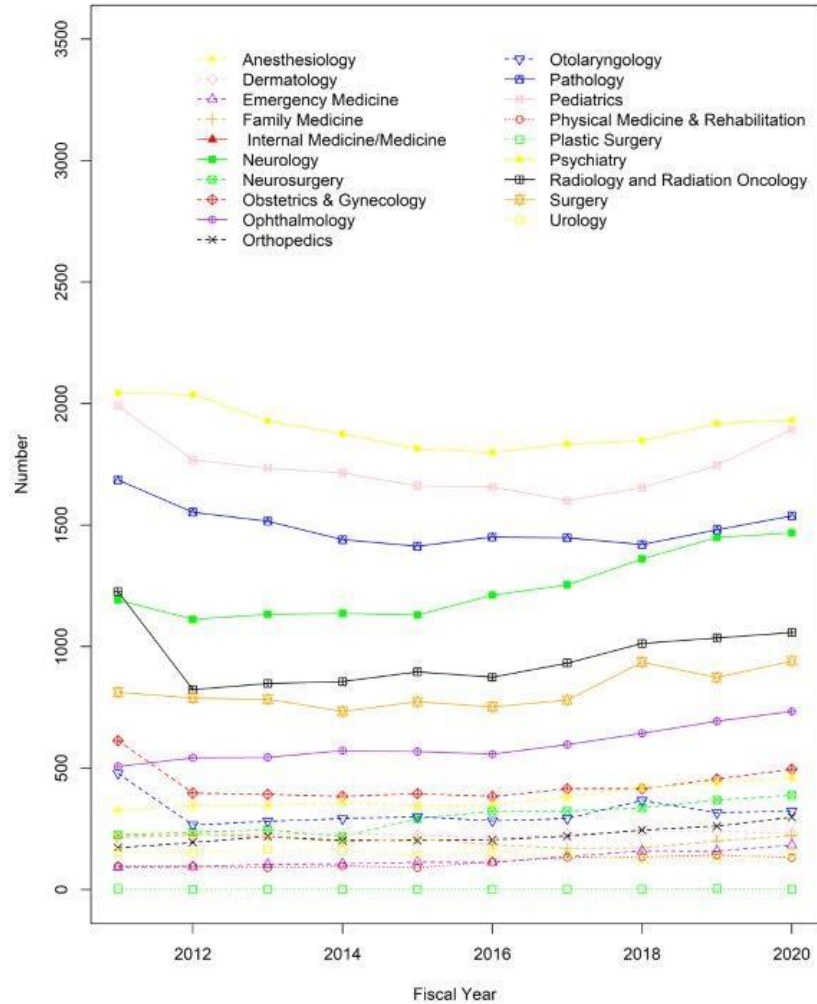

Supplement: bmjopen-2021-058191supp002.pdf [file bmjopen-2021-058191supp002.pdf]
