# Supplementary material for: Does NIH funding differ between medical specialties? A longitudinal analysis of NIH grant data by specialty and type of grant, 2011–2020
Source: PubMed Central journal article supplement — BMJ Open. 2022 Dec 29;12(12):e058191. doi: 10.1136/bmjopen-2021-058191 (PMC9809243; doi:10.1136/bmjopen-2021-058191), 2022-12-29
Supplement: bmjopen-2021-058191supp014.pdf [file bmjopen-2021-058191supp014.pdf]

Supplementary Table 1 : Number of NIH training grants (F32, T32) awarded from 2011-2020 by specialty

| F32 grants                    | 2011 | 2012 | 2013 | 2014 | 2015 | 2016 | 2017 | 2018 | 2019 | 2020 |
|-------------------------------|------|------|------|------|------|------|------|------|------|------|
| Anesthesiology                | 4    | 6    | 8    | 7    | 1    | 1    | 3    | 5    | 2    | 6    |
| Dermatology                   | 4    | 4    | 3    | 2    | 3    | 3    | 5    | 4    | 1    | 3    |
| Emergency Medicine            | 1    | 1    | 1    | 0    | 0    | 0    | 0    | 0    | 0    | 1    |
| Family Medicine               | 0    | 0    | 0    | 1    | 1    | 0    | 0    | 0    | 0    | 0    |
| Internal Medicine/Medicine    | 126  | 112  | 116  | 108  | 109  | 119  | 132  | 115  | 108  | 116  |
| Neurology                     | 15   | 10   | 20   | 31   | 29   | 23   | 29   | 27   | 29   | 22   |
| Neurosurgery                  | 8    | 8    | 8    | 8    | 10   | 10   | 9    | 15   | 8    | 12   |
| Obstetrics and Gynecology     | 4    | 6    | 4    | 4    | 5    | 4    | 3    | 6    | 5    | 5    |
| Ophthalmology                 | 4    | 7    | 7    | 9    | 12   | 8    | 10   | 7    | 9    | 10   |
| Orthopedics                   | 5    | 6    | 5    | 5    | 6    | 6    | 6    | 7    | 7    | 7    |
| Otolaryngology                | 10   | 7    | 7    | 10   | 6    | 8    | 14   | 10   | 8    | 6    |
| Pathology                     | 22   | 17   | 22   | 22   | 23   | 25   | 24   | 17   | 16   | 13   |
| Pediatrics                    | 25   | 27   | 24   | 24   | 18   | 17   | 15   | 13   | 19   | 12   |
| Physical Medicine & Rehab     | 1    | 1    | 0    | 1    | 1    | 1    | 3    | 4    | 3    | 2    |
| Plastic Surgery               | 0    | 0    | 0    | 0    | 0    | 0    | 0    | 0    | 1    | 0    |
| Psychiatry                    | 39   | 29   | 28   | 26   | 27   | 29   | 29   | 25   | 29   | 32   |
| Radiation-Diagnostic/Oncology | 14   | 8    | 5    | 1    | 2    | 9    | 8    | 7    | 4    | 7    |
| Surgery                       | 17   | 15   | 13   | 19   | 21   | 20   | 17   | 20   | 15   | 15   |
| Urology                       | 2    | 2    | 2    | 5    | 2    | 3    | 3    | 1    | 1    | 1    |
| T32                           | 2011 | 2012 | 2013 | 2014 | 2015 | 2016 | 2017 | 2018 | 2019 | 2020 |
| Anesthesiology                | 13   | 15   | 14   | 17   | 21   | 19   | 25   | 19   | 20   | 15   |
| Dermatology                   | 12   | 12   | 12   | 11   | 11   | 11   | 11   | 10   | 7    | 8    |
| Emergency Medicine            | 0    | 0    | 0    | 0    | 0    | 1    | 2    | 2    | 2    | 2    |
| Family Medicine               | 5    | 4    | 6    | 5    | 4    | 4    | 9    | 5    | 4    | 5    |
| Internal Medicine/Medicine    | 382  | 389  | 357  | 353  | 339  | 341  | 452  | 366  | 347  | 365  |
| Neurology                     | 37   | 34   | 32   | 32   | 29   | 30   | 38   | 36   | 35   | 37   |
| Neurosurgery                  | 3    | 3    | 3    | 3    | 5    | 5    | 6    | 4    | 6    | 8    |
| Obstetrics and Gynecology     | 12   | 11   | 12   | 11   | 12   | 10   | 13   | 7    | 8    | 11   |
| Ophthalmology                 | 15   | 16   | 21   | 19   | 17   | 18   | 27   | 22   | 26   | 23   |
| Orthopedics                   | 8    | 9    | 8    | 7    | 7    | 7    | 8    | 7    | 7    | 8    |
| Otolaryngology                | 12   | 12   | 11   | 14   | 15   | 15   | 29   | 17   | 16   | 16   |
| Pathology                     | 86   | 75   | 70   | 79   | 68   | 70   | 89   | 67   | 59   | 55   |
| Pediatrics                    | 108  | 99   | 90   | 87   | 90   | 84   | 88   | 73   | 74   | 72   |
| Physical Medicine & Rehab     | 9    | 4    | 4    | 3    | 3    | 4    | 5    | 5    | 4    | 5    |
| Plastic Surgery               | 0    | 0    | 0    | 0    | 0    | 0    | 0    | 0    | 0    | 0    |
| Psychiatry                    | 77   | 79   | 80   | 79   | 71   | 71   | 107  | 69   | 68   | 71   |
| Radiation-Diagnostic/Oncology | 22   | 20   | 22   | 26   | 28   | 27   | 33   | 32   | 30   | 26   |
| Surgery                       | 54   | 56   | 54   | 48   | 48   | 49   | 57   | 53   | 58   | 55   |
| Urology                       | 7    | 8    | 7    | 8    | 5    | 6    | 4    | 2    | 4    | 4    |

Supplementary Table 2: Number of NIH career development grants (K01, K08, K23) awarded from 2011-2020 by specialty

| K01                           | 2011 | 2012 | 2013 | 2014 | 2015 | 2016 | 2017 | 2018 | 2019 | 2020 |
|-------------------------------|------|------|------|------|------|------|------|------|------|------|
| Anesthesiology                | 4    | 4    | 4    | 5    | 5    | 5    | 6    | 8    | 5    | 7    |
| Dermatology                   | 4    | 4    | 6    | 4    | 6    | 7    | 11   | 13   | 10   | 8    |
| Emergency Medicine            | 0    | 1    | 1    | 1    | 2    | 0    | 0    | 1    | 1    | 2    |
| Family Medicine               | 11   | 13   | 10   | 7    | 7    | 8    | 8    | 9    | 9    | 15   |
| Internal Medicine/Medicine    | 130  | 125  | 126  | 144  | 159  | 143  | 135  | 154  | 170  | 176  |
| Neurology                     | 12   | 13   | 16   | 17   | 17   | 19   | 20   | 19   | 23   | 19   |
| Neurosurgery                  | 3    | 3    | 1    | 0    | 0    | 1    | 0    | 2    | 3    | 3    |
| Obstetrics and Gynecology     | 2    | 1    | 2    | 4    | 5    | 5    | 7    | 6    | 8    | 8    |
| Ophthalmology                 | 0    | 0    | 0    | 1    | 0    | 0    | 1    | 2    | 2    | 1    |
| Orthopedics                   | 5    | 4    | 7    | 7    | 10   | 7    | 6    | 5    | 6    | 5    |
| Otolaryngology                | 2    | 2    | 2    | 2    | 0    | 0    | 0    | 0    | 0    | 1    |
| Pathology                     | 13   | 14   | 15   | 14   | 13   | 12   | 13   | 16   | 17   | 21   |
| Pediatrics                    | 20   | 16   | 18   | 19   | 16   | 25   | 23   | 21   | 23   | 27   |
| Physical Medicine & Rehab     | 3    | 4    | 4    | 6    | 7    | 8    | 13   | 13   | 10   | 12   |
| Plastic Surgery               | 0    | 0    | 0    | 0    | 0    | 0    | 0    | 0    | 0    | 0    |
| Psychiatry                    | 81   | 84   | 76   | 75   | 72   | 67   | 70   | 65   | 72   | 81   |
| Radiation-Diagnostic/Oncology | 17   | 15   | 13   | 11   | 14   | 14   | 19   | 18   | 15   | 11   |
| Surgery                       | 8    | 7    | 11   | 7    | 10   | 12   | 13   | 9    | 8    | 7    |
| Urology                       | 1    | 1    | 1    | 1    | 3    | 4    | 6    | 5    | 5    | 6    |
| K08                           | 2011 | 2012 | 2013 | 2014 | 2015 | 2016 | 2017 | 2018 | 2019 | 2020 |
| Anesthesiology                | 13   | 14   | 15   | 15   | 13   | 12   | 16   | 21   | 25   | 23   |
| Dermatology                   | 18   | 19   | 17   | 16   | 15   | 12   | 14   | 11   | 14   | 10   |
| Emergency Medicine            | 2    | 4    | 7    | 4    | 5    | 7    | 7    | 8    | 7    | 7    |
| Family Medicine               | 5    | 5    | 5    | 2    | 1    | 1    | 1    | 1    | 3    | 3    |
| Internal Medicine/Medicine    | 277  | 270  | 243  | 0    | 228  | 241  | 230  | 251  | 281  | 274  |
| Neurology                     | 39   | 36   | 39   | 33   | 37   | 33   | 31   | 30   | 35   | 39   |
| Neurosurgery                  | 7    | 7    | 9    | 7    | 11   | 12   | 14   | 11   | 13   | 10   |
| Obstetrics and Gynecology     | 8    | 8    | 7    | 5    | 2    | 3    | 2    | 5    | 6    | 9    |
| Ophthalmology                 | 24   | 24   | 29   | 29   | 30   | 28   | 27   | 27   | 25   | 25   |
| Orthopedics                   | 1    | 2    | 4    | 4    | 4    | 5    | 7    | 7    | 7    | 7    |
| Otolaryngology                | 12   | 14   | 12   | 10   | 12   | 11   | 9    | 10   | 12   | 10   |
| Pathology                     | 38   | 33   | 36   | 33   | 32   | 24   | 25   | 28   | 27   | 30   |
| Pediatrics                    | 114  | 96   | 93   | 86   | 82   | 91   | 106  | 117  | 113  | 109  |
| Physical Medicine & Rehab     | 1    | 1    | 1    | 0    | 0    | 0    | 0    | 1    | 1    | 1    |
| Plastic Surgery               | 0    | 0    | 0    | 0    | 0    | 0    | 0    | 0    | 0    | 0    |
| Psychiatry                    | 34   | 31   | 21   | 28   | 22   | 23   | 25   | 23   | 19   | 24   |
| Radiation-Diagnostic/Oncology | 5    | 5    | 5    | 6    | 6    | 1    | 3    | 3    | 14   | 18   |
| Surgery                       | 59   | 57   | 50   | 46   | 38   | 38   | 39   | 44   | 45   | 48   |

| Urology                       | 8           | 8           | 11          | 7           | 4           | 5           | 5           | 5           | 5           | 5           |
|-------------------------------|-------------|-------------|-------------|-------------|-------------|-------------|-------------|-------------|-------------|-------------|
| <b>K23</b>                    | <b>2011</b> | <b>2012</b> | <b>2013</b> | <b>2014</b> | <b>2015</b> | <b>2016</b> | <b>2017</b> | <b>2018</b> | <b>2019</b> | <b>2020</b> |
| Anesthesiology                | 9           | 10          | 13          | 13          | 12          | 10          | 13          | 12          | 17          | 17          |
| Dermatology                   | 3           | 4           | 3           | 1           | 3           | 4           | 4           | 9           | 10          | 8           |
| Emergency Medicine            | 18          | 15          | 15          | 14          | 15          | 19          | 21          | 19          | 20          | 15          |
| Family Medicine               | 9           | 8           | 6           | 3           | 6           | 4           | 5           | 5           | 6           | 7           |
| Internal Medicine/Medicine    | 306         | 315         | 306         | 297         | 276         | 262         | 247         | 247         | 249         | 286         |
| Neurology                     | 61          | 59          | 48          | 50          | 52          | 43          | 48          | 53          | 58          | 57          |
| Neurosurgery                  | 2           | 4           | 5           | 4           | 5           | 5           | 4           | 4           | 5           | 6           |
| Obstetrics and Gynecology     | 12          | 14          | 11          | 14          | 10          | 5           | 7           | 8           | 10          | 12          |
| Ophthalmology                 | 15          | 11          | 13          | 11          | 13          | 20          | 21          | 21          | 21          | 20          |
| Orthopedics                   | 2           | 3           | 3           | 3           | 2           | 2           | 1           | 3           | 3           | 4           |
| Otolaryngology                | 8           | 6           | 6           | 9           | 12          | 11          | 12          | 12          | 12          | 12          |
| Pathology                     | 4           | 3           | 2           | 3           | 2           | 1           | 1           | 1           | 1           | 3           |
| Pediatrics                    | 94          | 93          | 89          | 89          | 79          | 65          | 85          | 93          | 108         | 129         |
| Physical Medicine & Rehab     | 7           | 6           | 10          | 12          | 9           | 10          | 6           | 2           | 3           | 3           |
| Plastic Surgery               | 0           | 0           | 0           | 0           | 0           | 0           | 0           | 0           | 0           | 0           |
| Psychiatry                    | 119         | 117         | 104         | 99          | 100         | 93          | 102         | 103         | 110         | 113         |
| Radiation-Diagnostic/Oncology | 6           | 4           | 4           | 4           | 4           | 4           | 4           | 2           | 1           | 3           |
| Surgery                       | 13          | 12          | 11          | 11          | 10          | 10          | 9           | 8           | 9           | 13          |
| Urology                       | 2           | 1           | 2           | 3           | 2           | 3           | 2           | 1           | 3           | 3           |
| Otolaryngology                | 142         | 149         | 159         | 157         | 164         | 157         | 152         | 178         | 196         | 188         |
| Pathology                     | 928         | 881         | 851         | 773         | 762         | 749         | 710         | 774         | 822         | 860         |
| Pediatrics                    | 769         | 803         | 777         | 764         | 715         | 715         | 679         | 720         | 734         | 791         |
| Physical Medicine & Rehab     | 31          | 35          | 33          | 37          | 34          | 42          | 50          | 60          | 61          | 60          |
| Plastic Surgery               | 3           | 0           | 1           | 1           | 0           | 0           | 1           | 0           | 1           | 0           |
| Psychiatry                    | 1010        | 990         | 904         | 896         | 822         | 846         | 864         | 899         | 903         | 932         |
| Radiation-Diagnostic/Oncology | 529         | 516         | 526         | 495         | 503         | 499         | 526         | 607         | 604         | 619         |
| Surgery                       | 413         | 390         | 369         | 359         | 360         | 350         | 384         | 412         | 449         | 489         |
| Urology                       | 78          | 77          | 83          | 76          | 63          | 60          | 61          | 60          | 61          | 67          |

Supplementary Table 3: Number of NIH advanced career grants (R01, R03, R21, P30, U01) awarded from 2011-2020 by specialty

|                               | 2011 | 2012 | 2013 | 2014 | 2015 | 2016 | 2017 | 2018 | 2019 | 2020 |
|-------------------------------|------|------|------|------|------|------|------|------|------|------|
| <b>R01</b>                    |      |      |      |      |      |      |      |      |      |      |
| Anesthesiology                | 199  | 214  | 214  | 227  | 212  | 211  | 217  | 250  | 250  | 264  |
| Dermatology                   | 115  | 124  | 126  | 116  | 111  | 106  | 106  | 121  | 124  | 110  |
| Emergency Medicine            | 26   | 30   | 30   | 33   | 39   | 38   | 42   | 49   | 54   | 74   |
| Family Medicine               | 77   | 85   | 76   | 68   | 77   | 71   | 70   | 75   | 89   | 99   |
| Internal Medicine/Medicine    | 3250 | 3114 | 2917 | 2831 | 2804 | 2903 | 3026 | 3184 | 3317 | 3455 |
| Neurology                     | 520  | 551  | 538  | 522  | 528  | 540  | 563  | 639  | 664  | 704  |
| Neurosurgery                  | 138  | 141  | 140  | 131  | 161  | 166  | 175  | 190  | 204  | 223  |
| Obstetrics and Gynecology     | 145  | 133  | 139  | 131  | 132  | 154  | 177  | 171  | 207  | 231  |
| Ophthalmology                 | 340  | 362  | 351  | 371  | 358  | 349  | 380  | 408  | 436  | 468  |
| Orthopedics                   | 111  | 119  | 134  | 124  | 121  | 131  | 138  | 141  | 152  | 178  |
| Otolaryngology                | 142  | 149  | 159  | 157  | 164  | 157  | 152  | 178  | 196  | 188  |
| Pathology                     | 928  | 881  | 851  | 773  | 762  | 749  | 710  | 774  | 822  | 860  |
| Pediatrics                    | 769  | 803  | 777  | 764  | 715  | 715  | 679  | 720  | 734  | 791  |
| Physical Medicine & Rehab     | 31   | 35   | 33   | 37   | 34   | 42   | 50   | 60   | 61   | 60   |
| Plastic Surgery               | 3    | 0    | 1    | 1    | 0    | 0    | 1    | 0    | 1    | 0    |
| Psychiatry                    | 1010 | 990  | 904  | 896  | 822  | 846  | 864  | 899  | 903  | 932  |
| Radiation-Diagnostic/Oncology | 529  | 516  | 526  | 495  | 503  | 499  | 526  | 607  | 604  | 619  |
| Surgery                       | 413  | 390  | 369  | 359  | 360  | 350  | 384  | 412  | 449  | 489  |
| Urology                       | 78   | 77   | 83   | 76   | 63   | 60   | 61   | 60   | 61   | 67   |
| <b>R03</b>                    |      |      |      |      |      |      |      |      |      |      |
| Anesthesiology                | 6    | 9    | 6    | 6    | 4    | 4    | 6    | 9    | 8    | 5    |
| Dermatology                   | 5    | 6    | 2    | 4    | 8    | 9    | 7    | 4    | 4    | 5    |
| Emergency Medicine            | 1    | 1    | 1    | 1    | 4    | 4    | 5    | 4    | 2    | 4    |
| Family Medicine               | 8    | 9    | 9    | 7    | 6    | 5    | 2    | 2    | 5    | 3    |
| Internal Medicine/Medicine    | 118  | 139  | 132  | 124  | 110  | 90   | 91   | 102  | 120  | 121  |
| Neurology                     | 10   | 9    | 11   | 12   | 13   | 16   | 15   | 15   | 15   | 13   |
| Neurosurgery                  | 3    | 8    | 8    | 5    | 7    | 4    | 2    | 2    | 2    | 6    |
| Obstetrics and Gynecology     | 8    | 12   | 10   | 12   | 10   | 11   | 15   | 17   | 14   | 10   |
| Ophthalmology                 | 0    | 0    | 0    | 2    | 3    | 1    | 1    | 2    | 3    | 3    |
| Orthopedics                   | 10   | 10   | 12   | 14   | 10   | 7    | 3    | 3    | 7    | 7    |
| Otolaryngology                | 13   | 18   | 19   | 15   | 14   | 12   | 12   | 10   | 2    | 3    |
| Pathology                     | 25   | 23   | 21   | 20   | 15   | 9    | 12   | 21   | 26   | 25   |
| Pediatrics                    | 38   | 29   | 35   | 34   | 34   | 43   | 35   | 41   | 38   | 35   |
| Physical Medicine & Rehab     | 7    | 7    | 5    | 7    | 5    | 5    | 3    | 4    | 7    | 8    |
| Plastic Surgery               | 0    | 0    | 0    | 0    | 0    | 1    | 1    | 0    | 0    | 0    |
| Psychiatry                    | 25   | 28   | 30   | 22   | 20   | 23   | 29   | 23   | 20   | 16   |
| Radiation-Diagnostic/Oncology | 8    | 7    | 10   | 17   | 21   | 9    | 11   | 18   | 22   | 22   |
| Surgery                       | 15   | 20   | 17   | 17   | 19   | 14   | 25   | 21   | 11   | 15   |
| Urology                       | 1    | 3    | 2    | 4    | 5    | 3    | 1    | 1    | 3    | 4    |
| <b>R21</b>                    |      |      |      |      |      |      |      |      |      |      |
| Anesthesiology                | 27   | 24   | 27   | 21   | 28   | 27   | 26   | 37   | 39   | 33   |
| Dermatology                   | 19   | 18   | 18   | 26   | 21   | 14   | 15   | 16   | 15   | 20   |
| Emergency Medicine            | 6    | 5    | 3    | 5    | 6    | 5    | 7    | 10   | 6    | 5    |
| Family Medicine               | 14   | 16   | 19   | 20   | 24   | 23   | 14   | 12   | 16   | 16   |
| Internal Medicine/Medicine    | 375  | 407  | 393  | 368  | 379  | 394  | 375  | 376  | 377  | 385  |
| Neurology                     | 64   | 78   | 73   | 73   | 72   | 79   | 82   | 93   | 107  | 70   |
| Neurosurgery                  | 13   | 18   | 22   | 21   | 35   | 36   | 27   | 26   | 41   | 33   |
| Obstetrics and Gynecology     | 33   | 28   | 27   | 25   | 24   | 24   | 21   | 28   | 33   | 43   |
| Ophthalmology                 | 21   | 19   | 30   | 29   | 36   | 34   | 24   | 31   | 51   | 52   |
| Orthopedics                   | 14   | 20   | 19   | 15   | 16   | 16   | 26   | 36   | 26   | 27   |
| Otolaryngology                | 14   | 16   | 21   | 28   | 23   | 14   | 15   | 31   | 30   | 33   |
| Pathology                     | 124  | 104  | 112  | 140  | 160  | 166  | 138  | 117  | 113  | 108  |
| Pediatrics                    | 104  | 95   | 102  | 108  | 121  | 123  | 116  | 118  | 127  | 132  |
| Physical Medicine & Rehab     | 4    | 7    | 11   | 9    | 4    | 9    | 13   | 10   | 13   | 9    |
| Plastic Surgery               | 0    | 0    | 0    | 0    | 0    | 0    | 0    | 0    | 0    | 0    |
| Psychiatry                    | 122  | 166  | 191  | 179  | 156  | 151  | 153  | 149  | 155  | 158  |

|                               | 2011        | 2012        | 2013        | 2014        | 2015        | 2016        | 2017        | 2018        | 2019        | 2020        |
|-------------------------------|-------------|-------------|-------------|-------------|-------------|-------------|-------------|-------------|-------------|-------------|
| Radiation-Diagnostic/On       | 97          | 101         | 102         | 115         | 121         | 118         | 115         | 89          | 103         | 101         |
| Surgery                       | 58          | 54          | 46          | 48          | 62          | 68          | 50          | 49          | 51          | 54          |
| Urology                       | 8           | 9           | 5           | 4           | 10          | 13          | 9           | 7           | 8           | 10          |
| <b>P30</b>                    | <b>2011</b> | <b>2012</b> | <b>2013</b> | <b>2014</b> | <b>2015</b> | <b>2016</b> | <b>2017</b> | <b>2018</b> | <b>2019</b> | <b>2020</b> |
| Anesthesiology                | 0           | 0           | 0           | 1           | 0           | 0           | 0           | 0           | 0           | 0           |
| Dermatology                   | 11          | 8           | 8           | 11          | 8           | 12          | 11          | 5           | 4           | 4           |
| Emergency Medicine            | 0           | 0           | 0           | 0           | 0           | 0           | 0           | 0           | 0           | 0           |
| Family Medicine               | 0           | 4           | 4           | 4           | 4           | 4           | 1           | 1           | 4           | 4           |
| Internal Medicine/Medicine    | 248         | 217         | 206         | 248         | 312         | 353         | 283         | 558         | 333         | 364         |
| Neurology                     | 15          | 19          | 16          | 14          | 14          | 16          | 16          | 18          | 21          | 32          |
| Neurosurgery                  | 3           | 3           | 3           | 2           | 2           | 1           | 1           | 1           | 2           | 0           |
| Obstetrics and Gynecology     | 3           | 3           | 2           | 3           | 5           | 6           | 0           | 3           | 6           | 10          |
| Ophthalmology                 | 31          | 37          | 30          | 29          | 32          | 29          | 29          | 31          | 29          | 26          |
| Orthopedics                   | 4           | 4           | 4           | 5           | 5           | 5           | 5           | 5           | 6           | 6           |
| Otolaryngology                | 15          | 8           | 7           | 8           | 6           | 5           | 1           | 61          | 1           | 6           |
| Pathology                     | 17          | 18          | 20          | 23          | 26          | 27          | 27          | 20          | 13          | 15          |
| Pediatrics                    | 17          | 21          | 23          | 18          | 18          | 20          | 18          | 12          | 14          | 25          |
| Physical Medicine & Rehab     | 0           | 0           | 0           | 0           | 0           | 0           | 0           | 0           | 0           | 0           |
| Plastic Surgery               | 0           | 0           | 0           | 0           | 0           | 0           | 0           | 0           | 0           | 0           |
| Psychiatry                    | 13          | 15          | 17          | 15          | 20          | 13          | 11          | 9           | 11          | 9           |
| Radiation-Diagnostic/Oncology | 5           | 6           | 5           | 7           | 8           | 7           | 10          | 10          | 12          | 11          |
| Surgery                       | 13          | 11          | 15          | 12          | 24          | 27          | 20          | 127         | 22          | 29          |
| Urology                       | 7           | 6           | 5           | 6           | 6           | 9           | 0           | 0           | 0           | 0           |
| <b>U01</b>                    | <b>2011</b> | <b>2012</b> | <b>2013</b> | <b>2014</b> | <b>2015</b> | <b>2016</b> | <b>2017</b> | <b>2018</b> | <b>2019</b> | <b>2020</b> |
| Anesthesiology                | 7           | 7           | 7           | 12          | 9           | 15          | 14          | 15          | 12          | 13          |
| Dermatology                   | 3           | 5           | 7           | 6           | 8           | 5           | 5           | 6           | 9           | 11          |
| Emergency Medicine            | 10          | 13          | 17          | 14          | 8           | 5           | 4           | 8           | 3           | 7           |
| Family Medicine               | 11          | 14          | 12          | 11          | 15          | 15          | 13          | 15          | 15          | 10          |
| Internal Medicine/Medicine    | 386         | 399         | 432         | 381         | 417         | 414         | 439         | 491         | 564         | 589         |
| Neurology                     | 33          | 40          | 40          | 54          | 56          | 78          | 62          | 70          | 68          | 76          |
| Neurosurgery                  | 6           | 4           | 8           | 7           | 13          | 27          | 25          | 21          | 10          | 8           |
| Obstetrics and Gynecology     | 15          | 17          | 8           | 13          | 23          | 13          | 16          | 12          | 9           | 11          |
| Ophthalmology                 | 4           | 7           | 5           | 5           | 5           | 5           | 6           | 10          | 12          | 8           |
| Orthopedics                   | 0           | 0           | 1           | 2           | 1           | 1           | 0           | 0           | 1           | 1           |
| Otolaryngology                | 4           | 4           | 3           | 4           | 3           | 3           | 4           | 5           | 4           | 4           |
| Pathology                     | 54          | 54          | 46          | 33          | 29          | 32          | 32          | 35          | 38          | 37          |
| Pediatrics                    | 130         | 128         | 116         | 120         | 124         | 103         | 109         | 110         | 111         | 110         |
| Physical Medicine & Rehab     | 4           | 3           | 7           | 7           | 8           | 5           | 5           | 6           | 3           | 3           |
| Plastic Surgery               | 0           | 0           | 0           | 0           | 0           | 0           | 0           | 1           | 1           | 1           |
| Psychiatry                    | 53          | 87          | 79          | 85          | 104         | 83          | 75          | 88          | 92          | 79          |
| Radiation-Diagnostic/Oncology | 14          | 18          | 22          | 26          | 34          | 29          | 40          | 54          | 56          | 49          |
| Surgery                       | 51          | 53          | 57          | 47          | 51          | 47          | 52          | 63          | 57          | 58          |
| Urology                       | 14          | 15          | 17          | 20          | 17          | 16          | 19          | 15          | 15          | 14          |

Supplementary Table 4: Number of active physicians per awarded NIH training grant (F32, T32) from 2011-2020 by specialty

|                               | 2011  | 2012  | 2013  | 2014   | 2015   | 2016  | 2017  | 2018  | 2019  | 2020  |
|-------------------------------|-------|-------|-------|--------|--------|-------|-------|-------|-------|-------|
| <b>F32</b>                    |       |       |       |        |        |       |       |       |       |       |
| Anesthesiology                | 1004  | 6740  | 5095  | 5865   | 41351  | 41557 | 1393  | 8403  | 21134 | 7045  |
| Dermatology                   | 2705  | 2773  | 3788  | 5767   | 3902   | 3960  | 2410  | 3071  | 12516 | 4172  |
| Emergency Medicine            | 33984 | 35613 | 37241 | -      | -      | -     | -     | -     | -     | 45202 |
| Family Medicine               | -     | -     | -     | 110106 | 111295 | -     | -     | -     | -     | -     |
| Internal Medicine/Medicine    | 865   | 983   | 957   | 1042   | 1047   | 965   | 875   | 1025  | 1113  | 1036  |
| Neurology                     | 861   | 1304  | 658   | 428    | 462    | 589   | 473   | 516   | 488   | 643   |
| Neurosurgery                  | 631   | 639   | 646   | 657    | 535    | 544   | 615   | 376   | 719   | 479   |
| Obstetrics and Gynecology     | 10094 | 6767  | 10207 | 10288  | 8296   | 10392 | 13885 | 7031  | 8544  | 8544  |
| Ophthalmology                 | 4486  | 2590  | 2617  | 2051   | 1549   | 2338  | 1882  | 2724  | 2146  | 1931  |
| Orthopedics                   | 3964  | 3266  | 3875  | 3852   | 3191   | 3179  | 3167  | 2719  | 2724  | 2724  |
| Otolaryngology                | 923   | 1325  | 1331  | 937    | 1569   | 1184  | 680   | 965   | 1222  | 1630  |
| Pathology                     | 681   | 844   | 623   | 614    | 578    | 523   | 535   | 749   | 790   | 973   |
| Pediatrics                    | 2220  | 2070  | 2344  | 2371   | 3197   | 3411  | 3896  | 4579  | 3190  | 5052  |
| Physical Medicine & Rehab     | 8503  | 8705  | -     | 9035   | 9164   | 9254  | 3114  | 2389  | 3256  | 4884  |
| Plastic Surgery               | -     | -     | -     | -      | -      | -     | -     | -     | 7317  | -     |
| Psychiatry                    | 982   | 1303  | 1332  | 1443   | 1398   | 1309  | 1317  | 1540  | 1338  | 1212  |
| Radiation-Diagnostic/Oncology | 2318  | 4387  | 7550  | 38191  | 19316  | 4360  | 4981  | 5796  | 10324 | 5900  |
| Surgery                       | 1548  | 1717  | 1937  | 1327   | 1203   | 1257  | 1473  | 1265  | 1704  | 1704  |
| Urology                       | 4913  | 4899  | 4886  | 1958   | 4904   | 3288  | 3307  | 10061 | 10201 | 10201 |
| <b>T32</b>                    |       |       |       |        |        |       |       |       |       |       |
| Anesthesiology                | 3086  | 2696  | 2911  | 2415   | 1969   | 2187  | 1670  | 2211  | 2113  | 2818  |
| Dermatology                   | 902   | 924   | 947   | 1049   | 1080   | 1096  | 1228  | 1788  | 1565  | 1565  |
| Emergency Medicine            | -     | -     | -     | -      | -      | 40964 | 21174 | 21888 | 22601 | 22601 |
| Family Medicine               | 21310 | 26933 | 18153 | 22021  | 27824  | 28101 | 12613 | 23171 | 29550 | 23640 |
| Internal Medicine/Medicine    | 285   | 283   | 311   | 319    | 337    | 337   | 256   | 322   | 346   | 329   |
| Neurology                     | 349   | 383   | 411   | 415    | 462    | 452   | 361   | 387   | 404   | 382   |
| Neurosurgery                  | 1682  | 1703  | 1724  | 1753   | 1069   | 1088  | 922   | 1410  | 958   | 719   |
| Obstetrics and Gynecology     | 3365  | 3691  | 3402  | 3741   | 3457   | 4157  | 3204  | 6027  | 5340  | 3884  |
| Ophthalmology                 | 1196  | 1133  | 872   | 971    | 1094   | 1039  | 697   | 867   | 743   | 840   |
| Orthopedics                   | 2478  | 2178  | 2422  | 2751   | 2735   | 2725  | 2375  | 2719  | 2724  | 2384  |
| Otolaryngology                | 769   | 773   | 847   | 669    | 627    | 631   | 328   | 568   | 611   | 611   |
| Pathology                     | 174   | 191   | 196   | 171    | 195    | 187   | 144   | 190   | 214   | 230   |
| Pediatrics                    | 514   | 565   | 625   | 654    | 639    | 690   | 664   | 815   | 819   | 842   |
| Physical Medicine & Rehab     | 945   | 2176  | 2227  | 3012   | 3055   | 2313  | 1869  | 1911  | 2442  | 1953  |

|                               |      |      |      |      |      |      |      |      |      |      |
|-------------------------------|------|------|------|------|------|------|------|------|------|------|
| Plastic Surgery               | -    | -    | -    | -    | -    | -    | -    | -    | -    |      |
| Psychiatry                    | 497  | 478  | 466  | 475  | 531  | 535  | 357  | 558  | 570  | 546  |
| Radiation-Diagnostic/Oncology | 1475 | 1755 | 1716 | 1469 | 1380 | 1453 | 1207 | 1268 | 1377 | 1588 |
| Surgery                       | 487  | 460  | 466  | 525  | 526  | 513  | 439  | 477  | 441  | 465  |
| Urology                       | 1404 | 1225 | 1396 | 1224 | 1962 | 1644 | 2480 | 5031 | 2550 | 2550 |

Supplementary Table 5: Number of active physicians per awarded NIH career development grant (K01, K08, K23) from 2011-2020 by specialty

|                               | 2011  | 2012  | 2013  | 2014  | 2015   | 2016   | 2017   | 2018   | 2019  | 2020  |
|-------------------------------|-------|-------|-------|-------|--------|--------|--------|--------|-------|-------|
| <b>K01</b>                    |       |       |       |       |        |        |        |        |       |       |
| Anesthesiology                | 10031 | 10110 | 10190 | 8211  | 8270   | 8311   | 6960   | 5252   | 8453  | 6038  |
| Dermatology                   | 2705  | 2773  | 1894  | 2884  | 1951   | 1697   | 1096   | 945    | 1252  | 1565  |
| Emergency Medicine            | -     | 35613 | 37241 | 38410 | 19790  | -      | -      | 43775  | 45202 | 22601 |
| Family Medicine               | 9686  | 8287  | 10892 | 15729 | 15899  | 14051  | 14189  | 12873  | 13133 | 7880  |
| Internal Medicine/Medicine    | 839   | 880   | 881   | 782   | 718    | 803    | 856    | 765    | 707   | 683   |
| Neurology                     | 1076  | 1003  | 822   | 781   | 788    | 713    | 686    | 733    | 615   | 745   |
| Neurosurgery                  | 1682  | 1703  | 5171  | -     | -      | 5439   | -      | 2820   | 1916  | 1916  |
| Obstetrics and Gynecology     | 20189 | 40602 | 20413 | 10288 | 8296   | 8314   | 5951   | 7031   | 5340  | 5340  |
| Ophthalmology                 | -     | -     | -     | 18455 | -      | -      | 18817  | 9532   | 9656  | 19312 |
| Orthopedics                   | 3964  | 4900  | 2768  | 2751  | 1915   | 2725   | 3167   | 3807   | 3178  | 3814  |
| Otolaryngology                | 4616  | 4638  | 4660  | 4683  | -      | -      | -      | -      | -     | 9777  |
| Pathology                     | 1152  | 1024  | 914   | 964   | 1022   | 1089   | 988    | 796    | 744   | 602   |
| Pediatrics                    | 2775  | 3493  | 3126  | 2995  | 3596   | 2320   | 2541   | 2835   | 2636  | 2245  |
| Physical Medicine & Rehab     | 2834  | 2176  | 2227  | 1506  | 1309   | 1157   | 719    | 735    | 977   | 814   |
| Plastic Surgery               | -     | -     | -     | -     | -      | -      | -      | -      | -     | -     |
| Psychiatry                    | 473   | 450   | 491   | 500   | 524    | 567    | 546    | 592    | 539   | 479   |
| Radiation-Diagnostic/Oncology | 1909  | 2340  | 2904  | 3472  | 2759   | 2803   | 2097   | 2254   | 2753  | 3754  |
| Surgery                       | 3289  | 3679  | 2290  | 3603  | 2525   | 2096   | 1926   | 2811   | 3196  | 3652  |
| Urology                       | 9826  | 9799  | 9771  | 9790  | 3269   | 2466   | 1654   | 2012   | 2040  | 1700  |
| <b>K08</b>                    |       |       |       |       |        |        |        |        |       |       |
| Anesthesiology                | 3344  | 2889  | 2717  | 2737  | 3446   | 2770   | 2784   | 1827   | 1691  | 2113  |
| Dermatology                   | 637   | 504   | 758   | 769   | 732    | 914    | 927    | 945    | 1043  | 1252  |
| Emergency Medicine            | 11328 | 8903  | 6207  | 9603  | 7916   | 5852   | 4705   | 5472   | 7534  | 7534  |
| Family Medicine               | 21310 | 21547 | 21783 | 55053 | 111295 | 112405 | 113514 | 115856 | 39399 | 39399 |
| Internal Medicine/Medicine    | 405   | 409   | 461   | 467   | 496    | 471    | 490    | 481    | 437   | 452   |
| Neurology                     | 340   | 352   | 337   | 415   | 352    | 411    | 416    | 464    | 393   | 393   |
| Neurosurgery                  | 721   | 730   | 646   | 657   | 486    | 418    | 395    | 513    | 479   | 575   |
| Obstetrics and Gynecology     | 5768  | 4511  | 5832  | 8231  | 20741  | 13856  | 20828  | 7031   | 6103  | 6103  |
| Ophthalmology                 | 718   | 755   | 654   | 595   | 563    | 693    | 752    | 706    | 840   | 805   |
| Orthopedics                   | 19822 | 6533  | 4844  | 4815  | 4786   | 4768   | 2714   | 2379   | 2724  | 3178  |
| Otolaryngology                | 769   | 714   | 717   | 851   | 724    | 861    | 1058   | 877    | 1086  | 978   |
| Pathology                     | 428   | 410   | 416   | 375   | 403    | 568    | 514    | 439    | 452   | 506   |
| Pediatrics                    | 509   | 565   | 592   | 677   | 710    | 630    | 513    | 518    | 532   | 606   |
| Physical Medicine & Rehab     | -     | 4352  | -     | -     | -      | -      | -      | 9555   | 9767  | 9767  |
| Plastic Surgery               | -     | -     | -     | -     | -      | -      | -      | -      | -     | -     |
| Psychiatry                    | 1160  | 1219  | 1963  | 1501  | 1509   | 1726   | 1661   | 1674   | 1940  | 1616  |
| Radiation-Diagnostic/Oncology | 6489  | 7020  | 7550  | 5456  | 12877  | 19620  | 13282  | 10143  | 2950  | 2429  |
| Surgery                       | 454   | 444   | 494   | 587   | 683    | 613    | 626    | 588    | 568   | 568   |
| Urology                       | 1092  | 1225  | 888   | 1632  | 2452   | 1973   | 1984   | 2515   | 1700  | 2040  |
| <b>K23</b>                    |       |       |       |       |        |        |        |        |       |       |
| Anesthesiology                | 4458  | 4044  | 3135  | 3158  | 3446   | 4156   | 3212   | 3501   | 2486  | 2486  |
| Dermatology                   | 3607  | 2773  | 3788  | 11535 | 3902   | 2970   | 3013   | 1365   | 1252  | 1565  |
| Emergency Medicine            | 1888  | 2374  | 2483  | 2744  | 2639   | 2156   | 2017   | 2304   | 2260  | 3013  |
| Family Medicine               | 11839 | 13467 | 18153 | 36702 | 18549  | 28101  | 22703  | 23171  | 19700 | 16885 |
| Internal Medicine/Medicine    | 356   | 349   | 363   | 379   | 413    | 438    | 468    | 477    | 483   | 420   |
| Neurology                     | 212   | 221   | 274   | 265   | 258    | 315    | 286    | 263    | 244   | 248   |
| Neurosurgery                  | 2524  | 1277  | 1034  | 1315  | 1069   | 1088   | 1383   | 1410   | 1150  | 958   |
| Obstetrics and Gynecology     | 3365  | 2900  | 3711  | 2940  | 4148   | 8314   | 5951   | 5274   | 4272  | 3560  |
| Ophthalmology                 | 1196  | 1648  | 1409  | 1678  | 1430   | 935    | 896    | 908    | 920   | 966   |
| Orthopedics                   | 9911  | 6533  | 6458  | 6420  | 9573   | 9537   | 19001  | 6345   | 6356  | 4767  |
| Otolaryngology                | 1154  | 1546  | 1553  | 1041  | 784    | 861    | 794    | 804    | 815   | 815   |
| Pathology                     | 3744  | 4781  | 6855  | 4499  | 6643   | 13063  | 12839  | 12741  | 12643 | 4214  |
| Pediatrics                    | 591   | 601   | 632   | 639   | 728    | 892    | 687    | 640    | 561   | 470   |
| Physical Medicine & Rehab     | 1215  | 1451  | 891   | 753   | 1018   | 925    | 1557   | 4778   | 3256  | 3256  |
| Plastic Surgery               | -     | -     | -     | -     | -      | -      | -      | -      | -     | -     |
| Psychiatry                    | 322   | 323   | 359   | 379   | 377    | 408    | 375    | 374    | 353   | 343   |
| Radiation-Diagnostic/Oncology | 5408  | 8774  | 9438  | 9548  | 9658   | 9810   | 9962   | 20286  | 41297 | 13766 |
| Surgery                       | 2024  | 2146  | 2290  | 2293  | 2525   | 2515   | 2782   | 3163   | 2840  | 1966  |
| Urology                       | 4913  | 9799  | 4886  | 3263  | 4904   | 3288   | 4961   | 10061  | 3400  | 3400  |

Supplementary Table 6: Number of active physicians per awarded NIH advanced career grant (R01, R03, R21, P30, U01) from 2011-2020 by specialty

|                            | 2011 | 2012 | 2013 | 2014 | 2015 | 2016 | 2017 | 2018 | 2019 | 2020 |
|----------------------------|------|------|------|------|------|------|------|------|------|------|
| <b>R01</b>                 |      |      |      |      |      |      |      |      |      |      |
| Anesthesiology             | 202  | 189  | 190  | 181  | 195  | 197  | 192  | 168  | 169  | 160  |
| Dermatology                | 94   | 89   | 90   | 99   | 101  | 107  | 114  | 102  | 101  | 114  |
| Emergency Medicine         | 1307 | 1187 | 1241 | 1164 | 1015 | 1078 | 1008 | 893  | 837  | 611  |
| Family Medicine            | 1384 | 1267 | 1433 | 1619 | 1445 | 1583 | 1622 | 1545 | 1328 | 1194 |
| Internal Medicine/Medicine | 34   | 35   | 38   | 40   | 41   | 40   | 38   | 37   | 36   | 35   |
| Neurology                  | 25   | 24   | 24   | 25   | 25   | 25   | 24   | 23   | 21   | 20   |
| Neurosurgery               | 37   | 36   | 37   | 40   | 33   | 33   | 32   | 30   | 28   | 26   |
| Obstetrics and Gynecology  | 278  | 305  | 294  | 314  | 314  | 270  | 235  | 247  | 206  | 185  |
| Ophthalmology              | 53   | 50   | 52   | 50   | 52   | 54   | 50   | 47   | 44   | 41   |
| Orthopedics                | 179  | 165  | 145  | 155  | 158  | 146  | 138  | 135  | 125  | 107  |
| Otolaryngology             | 65   | 62   | 59   | 60   | 57   | 60   | 63   | 54   | 50   | 52   |
| Pathology                  | 16   | 16   | 16   | 17   | 17   | 17   | 18   | 16   | 15   | 15   |

|                               |             |             |             |             |             |             |             |             |             |             |
|-------------------------------|-------------|-------------|-------------|-------------|-------------|-------------|-------------|-------------|-------------|-------------|
| Pediatrics                    | 72          | 70          | 72          | 74          | 80          | 81          | 86          | 83          | 83          | 77          |
| Physical Medicine & Rehab     | 274         | 249         | 270         | 244         | 270         | 220         | 187         | 159         | 160         | 163         |
| Plastic Surgery               | 2274        | -           | 6942        | 6981        | -           | -           | 7142        | -           | 7317        | -           |
| Psychiatry                    | 38          | 38          | 41          | 42          | 46          | 45          | 44          | 43          | 43          | 42          |
| Radiation-Diagnostic/Oncology | 61          | 68          | 72          | 77          | 77          | 79          | 76          | 67          | 68          | 67          |
| Surgery                       | 64          | 66          | 68          | 70          | 70          | 72          | 65          | 61          | 57          | 52          |
| Urology                       | 126         | 127         | 118         | 129         | 156         | 164         | 163         | 168         | 167         | 152         |
| <b>R03</b>                    | <b>2011</b> | <b>2012</b> | <b>2013</b> | <b>2014</b> | <b>2015</b> | <b>2016</b> | <b>2017</b> | <b>2018</b> | <b>2019</b> | <b>2020</b> |
| Anesthesiology                | 6687        | 4493        | 6793        | 6842        | 10338       | 10389       | 6960        | 4668        | 5283        | 8453        |
| Dermatology                   | 2164        | 1849        | 5682        | 2884        | 1463        | 1320        | 1722        | 3071        | 3129        | 2503        |
| Emergency Medicine            | 33984       | 35613       | 37241       | 38410       | 9895        | 10241       | 8470        | 10944       | 22601       | 11301       |
| Family Medicine               | 13319       | 11970       | 12102       | 15729       | 18549       | 22481       | 56757       | 57928       | 23640       | 39399       |
| Internal Medicine/Medicine    | 924         | 792         | 841         | 908         | 1037        | 1276        | 1270        | 1156        | 1001        | 993         |
| Neurology                     | 1292        | 1448        | 1196        | 1106        | 1030        | 847         | 914         | 929         | 944         | 1088        |
| Neurosurgery                  | 1682        | 639         | 646         | 1052        | 764         | 1360        | 2766        | 2820        | 2874        | 958         |
| Obstetrics and Gynecology     | 5047        | 3383        | 4083        | 3429        | 4148        | 3779        | 2777        | 2482        | 3051        | 4272        |
| Ophthalmology                 | -           | -           | -           | 9228        | 6198        | 18705       | 18817       | 9532        | 6437        | 6437        |
| Orthopedics                   | 1982        | 1960        | 1615        | 1376        | 1915        | 2725        | 6334        | 6345        | 2724        | 2724        |
| Otolaryngology                | 710         | 515         | 491         | 624         | 672         | 789         | 794         | 965         | 4889        | 3259        |
| Pathology                     | 599         | 624         | 653         | 675         | 886         | 1451        | 1070        | 607         | 486         | 506         |
| Pediatrics                    | 1461        | 1928        | 1607        | 1674        | 1692        | 1349        | 1670        | 1452        | 1595        | 1732        |
| Physical Medicine & Rehab     | 1215        | 1244        | 1781        | 1291        | 1833        | 1851        | 3114        | 2389        | 1395        | 1221        |
| Plastic Surgery               | -           | -           | -           | -           | -           | 7081        | 7142        | -           | -           | -           |
| Psychiatry                    | 1531        | 1350        | 1243        | 1705        | 1887        | 1651        | 1317        | 1674        | 1940        | 2425        |
| Radiation-Diagnostic/Oncology | 4056        | 5014        | 3775        | 2247        | 1840        | 4360        | 3622        | 2254        | 1877        | 1877        |
| Surgery                       | 1754        | 1288        | 1482        | 1484        | 1329        | 1796        | 1002        | 1205        | 2324        | 1704        |
| Urology                       | 9826        | 3266        | 4886        | 2447        | 1962        | 3288        | 9921        | 10061       | 3400        | 2550        |
| <b>R21</b>                    | <b>2011</b> | <b>2012</b> | <b>2013</b> | <b>2014</b> | <b>2015</b> | <b>2016</b> | <b>2017</b> | <b>2018</b> | <b>2019</b> | <b>2020</b> |
| Anesthesiology                | 1486        | 1685        | 1510        | 1955        | 1477        | 1539        | 1606        | 1136        | 1084        | 1281        |
| Dermatology                   | 569         | 616         | 631         | 444         | 557         | 848         | 803         | 768         | 834         | 626         |
| Emergency Medicine            | 5664        | 7123        | 12414       | 7682        | 6597        | 8193        | 6050        | 4378        | 7534        | 9040        |
| Family Medicine               | 7611        | 6733        | 5732        | 5505        | 4637        | 4887        | 8108        | 9655        | 7387        | 7387        |
| Internal Medicine/Medicine    | 291         | 270         | 283         | 306         | 301         | 291         | 308         | 313         | 319         | 312         |
| Neurology                     | 202         | 167         | 180         | 182         | 186         | 172         | 167         | 150         | 132         | 202         |
| Neurosurgery                  | 388         | 284         | 235         | 250         | 153         | 151         | 205         | 217         | 140         | 174         |
| Obstetrics and Gynecology     | 1224        | 1450        | 1512        | 1646        | 1728        | 1732        | 1984        | 1507        | 1295        | 993         |
| Ophthalmology                 | 854         | 954         | 611         | 636         | 516         | 550         | 784         | 615         | 379         | 371         |
| Orthopedics                   | 1416        | 980         | 1020        | 1284        | 1197        | 1192        | 731         | 529         | 733         | 706         |
| Otolaryngology                | 659         | 580         | 444         | 334         | 409         | 676         | 635         | 311         | 326         | 296         |
| Pathology                     | 121         | 138         | 122         | 96          | 83          | 79          | 93          | 109         | 112         | 117         |
| Pediatrics                    | 534         | 588         | 552         | 527         | 476         | 471         | 504         | 504         | 477         | 459         |
| Physical Medicine & Rehab     | 2126        | 1244        | 810         | 1004        | 2291        | 1028        | 719         | 956         | 751         | 1085        |
| Plastic Surgery               | -           | -           | -           | -           | -           | -           | -           | -           | -           | -           |
| Psychiatry                    | 314         | 228         | 195         | 210         | 242         | 251         | 250         | 258         | 250         | 246         |
| Radiation-Diagnostic/Oncology | 334         | 348         | 370         | 332         | 319         | 333         | 346         | 456         | 401         | 409         |
| Surgery                       | 454         | 477         | 548         | 525         | 407         | 370         | 501         | 516         | 501         | 473         |
| Urology                       | 1228        | 1089        | 1954        | 2447        | 981         | 759         | 1102        | 1437        | 1275        | 1020        |
| <b>P30</b>                    | <b>2011</b> | <b>2012</b> | <b>2013</b> | <b>2014</b> | <b>2015</b> | <b>2016</b> | <b>2017</b> | <b>2018</b> | <b>2019</b> | <b>2020</b> |
| Anesthesiology                | -           | -           | -           | 41055       | -           | -           | -           | -           | -           | -           |
| Dermatology                   | 984         | 1386        | 1420        | 1049        | 1463        | 990         | 1096        | 2457        | 3129        | 3129        |
| Emergency Medicine            | -           | -           | -           | -           | -           | -           | -           | -           | -           | -           |
| Family Medicine               | -           | 26933       | 27229       | 27527       | 27824       | 28101       | 11351       | 11585       | 29550       | 29550       |
| Internal Medicine/Medicine    | 440         | 507         | 539         | 454         | 366         | 325         | 408         | 211         | 361         | 330         |
| Neurology                     | 861         | 686         | 822         | 948         | 957         | 847         | 857         | 774         | 674         | 442         |
| Neurosurgery                  | 1682        | 1703        | 1724        | 2629        | 2673        | 5439        | 5531        | 5640        | 2874        | -           |
| Obstetrics and Gynecology     | 1345        | 13534       | 2041        | 13718       | 8296        | 6928        | -           | 14063       | 7120        | 4272        |
| Ophthalmology                 | 579         | 490         | 611         | 636         | 581         | 645         | 649         | 615         | 666         | 743         |
| Orthopedics                   | 4956        | 4900        | 4844        | 3852        | 3829        | 3815        | 3800        | 3807        | 3178        | 3178        |
| Otolaryngology                | 615         | 1160        | 1331        | 1171        | 1569        | 1894        | 9526        | 158         | 9777        | 1630        |
| Pathology                     | 881         | 797         | 686         | 587         | 511         | 484         | 476         | 637         | 973         | 843         |
| Pediatrics                    | 3265        | 2661        | 2446        | 3161        | 3197        | 2899        | 3246        | 4961        | 4330        | 2425        |
| Physical Medicine & Rehab     | -           | -           | -           | -           | -           | -           | -           | -           | -           | -           |
| Plastic Surgery               | -           | -           | -           | -           | -           | -           | -           | -           | -           | -           |
| Psychiatry                    | 2945        | 2520        | 2194        | 2501        | 1887        | 2921        | 3473        | 4278        | 3527        | 4310        |
| Radiation-Diagnostic/Oncology | 6489        | 5850        | 7550        | 5456        | 4829        | 5606        | 3985        | 4057        | 3441        | 3754        |
| Surgery                       | 2024        | 2341        | 1679        | 2102        | 1052        | 931         | 1252        | 199         | 1162        | 882         |
| Urology                       | 1404        | 1633        | 1954        | 1632        | 1635        | 1096        | -           | -           | -           | -           |
| <b>U01</b>                    | <b>2011</b> | <b>2012</b> | <b>2013</b> | <b>2014</b> | <b>2015</b> | <b>2016</b> | <b>2017</b> | <b>2018</b> | <b>2019</b> | <b>2020</b> |
| Anesthesiology                | 5732        | 5777        | 5823        | 3421        | 4595        | 2770        | 2983        | 2801        | 3522        | 3251        |
| Dermatology                   | 3607        | 2218        | 1623        | 1922        | 1463        | 2376        | 2410        | 2047        | 1391        | 1138        |
| Emergency Medicine            | 3398        | 2739        | 2191        | 2744        | 4947        | 8193        | 10587       | 5472        | 15067       | 6457        |
| Family Medicine               | 9686        | 7695        | 9076        | 10010       | 7420        | 7494        | 8732        | 7724        | 7880        | 11820       |
| Internal Medicine/Medicine    | 283         | 276         | 257         | 295         | 274         | 277         | 263         | 240         | 213         | 204         |
| Neurology                     | 391         | 326         | 329         | 246         | 239         | 174         | 221         | 199         | 208         | 186         |
| Neurosurgery                  | 841         | 1277        | 646         | 751         | 411         | 201         | 221         | 269         | 575         | 719         |
| Obstetrics and Gynecology     | 2692        | 2388        | 5103        | 3166        | 1804        | 3198        | 2604        | 3516        | 4747        | 3884        |
| Ophthalmology                 | 4486        | 2590        | 3663        | 3691        | 3719        | 3741        | 3136        | 1906        | 1609        | 2414        |
| Orthopedics                   | -           | -           | 19374       | 9629        | 19145       | 19073       | -           | -           | 19069       | 19069       |
| Otolaryngology                | 2308        | 2319        | 3107        | 2341        | 3137        | 3156        | 2382        | 1930        | 2444        | 2444        |
| Pathology                     | 277         | 266         | 298         | 409         | 458         | 408         | 401         | 364         | 333         | 342         |
| Pediatrics                    | 427         | 437         | 485         | 474         | 464         | 563         | 536         | 541         | 546         | 551         |

|                               |      |      |      |      |      |      |      |      |      |      |
|-------------------------------|------|------|------|------|------|------|------|------|------|------|
| Physical Medicine & Rehab     | 2126 | 2902 | 1272 | 1291 | 1146 | 1851 | 1869 | 1593 | 3256 | 3256 |
| Plastic Surgery               | -    | -    | -    | -    | -    | -    | -    | 7230 | 7317 | 7317 |
| Psychiatry                    | 722  | 434  | 472  | 441  | 363  | 457  | 509  | 437  | 422  | 491  |
| Radiation-Diagnostic/Oncology | 2318 | 1950 | 1716 | 1469 | 1136 | 1353 | 996  | 751  | 737  | 843  |
| Surgery                       | 516  | 486  | 442  | 537  | 495  | 535  | 482  | 402  | 448  | 441  |
| Urology                       | 702  | 653  | 575  | 489  | 577  | 617  | 522  | 774  | 680  | 729  |

Supplementary Table 7: Total NIH training grant (F32, T32) funding in thousands of dollars from 2011-2020 by specialty

|                               | 2011   | 2012   | 2013   | 2014   | 2015   | 2016   | 2017   | 2018   | 2019   | 2020   |
|-------------------------------|--------|--------|--------|--------|--------|--------|--------|--------|--------|--------|
| <b>F32</b>                    |        |        |        |        |        |        |        |        |        |        |
| Anesthesiology                | 192    | 309    | 397    | 305    | 24     | 58     | 171    | 288    | 122    | 390    |
| Dermatology                   | 173    | 223    | 156    | 86     | 149    | 167    | 231    | 233    | 66     | 198    |
| Emergency Medicine            | 59     | 54     | 62     | 0      | 0      | 0      | 0      | 0      | 0      | 65     |
| Family Medicine               | 0      | 0      | 0      | 56     | 20     | 0      | 0      | 0      | 0      | 0      |
| Internal Medicine/Medicine    | 6543   | 5803   | 5850   | 5543   | 5833   | 6417   | 6236   | 6436   | 6670   | 7700   |
| Neurology                     | 732    | 449    | 964    | 1539   | 1457   | 1296   | 1234   | 1520   | 1584   | 1393   |
| Neurosurgery                  | 421    | 365    | 338    | 413    | 503    | 538    | 529    | 802    | 443    | 726    |
| Obstetrics and Gynecology     | 209    | 290    | 175    | 215    | 276    | 229    | 146    | 356    | 310    | 304    |
| Ophthalmology                 | 180    | 351    | 385    | 491    | 644    | 398    | 430    | 420    | 532    | 567    |
| Orthopedics                   | 247    | 288    | 252    | 231    | 321    | 288    | 331    | 429    | 446    | 471    |
| Otolaryngology                | 527    | 384    | 355    | 508    | 297    | 463    | 595    | 542    | 500    | 434    |
| Pathology                     | 1141   | 865    | 955    | 1023   | 1207   | 1368   | 892    | 1052   | 980    | 726    |
| Pediatrics                    | 1339   | 1416   | 1246   | 1229   | 867    | 773    | 737    | 762    | 1158   | 667    |
| Physical Medicine & Rehab     | 51     | 52     | 0      | 56     | 41     | 69     | 188    | 246    | 197    | 137    |
| Plastic Surgery               | 0      | 0      | 0      | 0      | 0      | 0      | 0      | 0      | 71     | 0      |
| Psychiatry                    | 1921   | 1391   | 1318   | 1254   | 1424   | 1560   | 1178   | 1385   | 1700   | 2021   |
| Radiation-Diagnostic/Oncology | 708    | 400    | 185    | 55     | 112    | 478    | 383    | 429    | 269    | 456    |
| Surgery                       | 831    | 760    | 662    | 983    | 1149   | 1027   | 942    | 1285   | 1008   | 1091   |
| Urology                       | 116    | 106    | 111    | 223    | 121    | 156    | 118    | 74     | 66     | 80     |
| <b>T32</b>                    |        |        |        |        |        |        |        |        |        |        |
| Anesthesiology                | 2305   | 2641   | 2729   | 3258   | 4813   | 4967   | 5373   | 5038   | 5083   | 4496   |
| Dermatology                   | 2246   | 2446   | 2263   | 1840   | 2359   | 2357   | 2268   | 2180   | 1957   | 2035   |
| Emergency Medicine            | 0      | 0      | 0      | 0      | 0      | 169    | 740    | 894    | 916    | 731    |
| Family Medicine               | 1235   | 1172   | 1528   | 1487   | 1507   | 1328   | 2196   | 1739   | 1472   | 1750   |
| Internal Medicine/Medicine    | 115016 | 115950 | 111668 | 111459 | 115327 | 119832 | 120062 | 132678 | 134551 | 139263 |
| Neurology                     | 9544   | 8462   | 8315   | 10030  | 9009   | 9960   | 10802  | 11276  | 9092   | 11524  |
| Neurosurgery                  | 592    | 531    | 582    | 600    | 1739   | 1820   | 1644   | 2273   | 3672   | 4010   |
| Obstetrics and Gynecology     | 2392   | 2382   | 2526   | 2622   | 2685   | 2442   | 2154   | 1666   | 1762   | 2863   |
| Ophthalmology                 | 2879   | 3175   | 4438   | 4390   | 4005   | 3857   | 3762   | 4064   | 4869   | 4752   |
| Orthopedics                   | 1751   | 2082   | 1823   | 1617   | 1686   | 1676   | 1832   | 1568   | 1675   | 2073   |
| Otolaryngology                | 2477   | 3339   | 2847   | 3672   | 3961   | 3768   | 4342   | 4372   | 4284   | 4832   |
| Pathology                     | 327477 | 291955 | 262466 | 26906  | 24478  | 24051  | 25070  | 24675  | 22805  | 20179  |
| Pediatrics                    | 24470  | 24006  | 22657  | 21653  | 24482  | 24548  | 21927  | 24246  | 25047  | 25786  |
| Physical Medicine & Rehab     | 1431   | 1068   | 1092   | 844    | 939    | 1004   | 1063   | 1287   | 1263   | 1605   |
| Plastic Surgery               | 0      | 0      | 0      | 0      | 0      | 0      | 0      | 0      | 0      | 0      |
| Psychiatry                    | 20056  | 20663  | 20323  | 19112  | 18134  | 20311  | 21132  | 21545  | 22702  | 26075  |
| Radiation-Diagnostic/Oncology | 5579   | 4095   | 4651   | 4886   | 5477   | 7208   | 6005   | 7795   | 7771   | 6639   |
| Surgery                       | 12609  | 12273  | 11253  | 10806  | 10501  | 12327  | 13198  | 16012  | 17863  | 16442  |
| Urology                       | 1084   | 1224   | 1151   | 1166   | 648    | 906    | 623    | 335    | 989    | 1156   |

Inflation-Adjusted Total NIH training grant (F32, T32) funding in thousands of dollars from 2011-2020 by specialty

|                               | 1.000  | 0.982  | 0.964  | 0.946  | 0.935  | 0.928  | 0.911  | 0.891  | 0.874  | 0.862  |
|-------------------------------|--------|--------|--------|--------|--------|--------|--------|--------|--------|--------|
| <b>F32</b>                    |        |        |        |        |        |        |        |        |        |        |
| Anesthesiology                | 192    | 303    | 383    | 289    | 22     | 54     | 156    | 257    | 107    | 336    |
| Dermatology                   | 173    | 219    | 150    | 81     | 139    | 155    | 211    | 208    | 58     | 171    |
| Emergency Medicine            | 59     | 53     | 60     | 0      | 0      | 0      | 0      | 0      | 0      | 56     |
| Family Medicine               | 0      | 0      | 0      | 53     | 19     | 0      | 0      | 0      | 0      | 0      |
| Internal Medicine/Medicine    | 6543   | 5699   | 5641   | 5244   | 5456   | 5953   | 5684   | 5732   | 5827   | 6638   |
| Neurology                     | 732    | 441    | 930    | 1456   | 1363   | 1202   | 1125   | 1354   | 1384   | 1201   |
| Neurosurgery                  | 421    | 358    | 326    | 391    | 470    | 499    | 482    | 714    | 387    | 626    |
| Obstetrics and Gynecology     | 209    | 285    | 169    | 203    | 258    | 212    | 133    | 317    | 271    | 262    |
| Ophthalmology                 | 180    | 345    | 371    | 465    | 602    | 369    | 392    | 374    | 465    | 489    |
| Orthopedics                   | 247    | 283    | 243    | 219    | 300    | 267    | 302    | 382    | 390    | 406    |
| Otolaryngology                | 527    | 377    | 342    | 481    | 278    | 430    | 542    | 483    | 437    | 374    |
| Pathology                     | 1141   | 849    | 921    | 968    | 1129   | 1269   | 813    | 937    | 856    | 626    |
| Pediatrics                    | 1339   | 1391   | 1202   | 1163   | 811    | 717    | 672    | 679    | 1012   | 575    |
| Physical Medicine & Rehab     | 51     | 51     | 0      | 53     | 38     | 64     | 171    | 219    | 172    | 118    |
| Plastic Surgery               | 0      | 0      | 0      | 0      | 0      | 0      | 0      | 0      | 62     | 0      |
| Psychiatry                    | 1921   | 1366   | 1271   | 1186   | 1332   | 1447   | 1074   | 1234   | 1485   | 1742   |
| Radiation-Diagnostic/Oncology | 708    | 393    | 178    | 52     | 105    | 443    | 349    | 382    | 235    | 393    |
| Surgery                       | 831    | 746    | 638    | 930    | 1075   | 953    | 859    | 1145   | 881    | 941    |
| Urology                       | 116    | 104    | 107    | 211    | 113    | 145    | 108    | 66     | 58     | 69     |
| <b>T32</b>                    |        |        |        |        |        |        |        |        |        |        |
| Anesthesiology                | 2305   | 2594   | 2632   | 3082   | 4502   | 4608   | 4897   | 4487   | 4440   | 3876   |
| Dermatology                   | 2246   | 2402   | 2182   | 1741   | 2206   | 2187   | 2067   | 1942   | 1710   | 1754   |
| Emergency Medicine            | 0      | 0      | 0      | 0      | 0      | 157    | 674    | 796    | 800    | 630    |
| Family Medicine               | 1235   | 1151   | 1474   | 1407   | 1410   | 1232   | 2002   | 1549   | 1286   | 1509   |
| Internal Medicine/Medicine    | 115016 | 113866 | 107687 | 105445 | 107871 | 111165 | 109429 | 118174 | 117542 | 120064 |
| Neurology                     | 9544   | 8310   | 8019   | 9489   | 8427   | 9240   | 9845   | 10043  | 7943   | 9935   |
| Neurosurgery                  | 592    | 521    | 561    | 568    | 1627   | 1688   | 1498   | 2025   | 3208   | 3457   |
| Obstetrics and Gynecology     | 2392   | 2339   | 2436   | 2481   | 2511   | 2265   | 1963   | 1484   | 1539   | 2468   |

|                               |        |        |        |       |       |       |       |       |       |       |
|-------------------------------|--------|--------|--------|-------|-------|-------|-------|-------|-------|-------|
| Ophthalmology                 | 2879   | 3118   | 4280   | 4153  | 3746  | 3578  | 3429  | 3620  | 4253  | 4097  |
| Orthopedics                   | 1751   | 2045   | 1758   | 1530  | 1577  | 1555  | 1670  | 1397  | 1463  | 1787  |
| Otolaryngology                | 2477   | 3279   | 2745   | 3474  | 3705  | 3495  | 3957  | 3894  | 3742  | 4166  |
| Pathology                     | 327477 | 286708 | 253108 | 25454 | 22895 | 22311 | 22850 | 21978 | 19922 | 17397 |
| Pediatrics                    | 24470  | 23575  | 21849  | 20485 | 22899 | 22773 | 19985 | 21595 | 21881 | 22231 |
| Physical Medicine & Rehab     | 1431   | 1049   | 1053   | 798   | 878   | 931   | 969   | 1146  | 1103  | 1384  |
| Plastic Surgery               | 0      | 0      | 0      | 0     | 0     | 0     | 0     | 0     | 0     | 0     |
| Psychiatry                    | 20056  | 20292  | 19598  | 18081 | 16962 | 18842 | 19260 | 19190 | 19832 | 22480 |
| Radiation-Diagnostic/Oncology | 5579   | 4021   | 4485   | 4622  | 5123  | 6687  | 5473  | 6943  | 6789  | 5724  |
| Surgery                       | 12609  | 12052  | 10852  | 10223 | 9822  | 11435 | 12029 | 14262 | 15605 | 14175 |
| Urology                       | 1084   | 1202   | 1110   | 1103  | 606   | 840   | 568   | 298   | 864   | 997   |

Supplementary Table 8: Total NIH career development grant (K01, K08, K23) funding in thousands of dollars from 2011-2020 by specialty

| K01                           | 2011  | 2012  | 2013  | 2014  | 2015  | 2016  | 2017  | 2018  | 2019  | 2020  |
|-------------------------------|-------|-------|-------|-------|-------|-------|-------|-------|-------|-------|
| Anesthesiology                | 480   | 485   | 463   | 613   | 884   | 888   | 1031  | 1209  | 655   | 990   |
| Dermatology                   | 375   | 467   | 596   | 445   | 647   | 779   | 1280  | 1341  | 1030  | 940   |
| Emergency Medicine            | 0     | 136   | 134   | 132   | 276   | 0     | 0     | 41    | 123   | 247   |
| Family Medicine               | 1241  | 1561  | 1182  | 896   | 930   | 1072  | 1086  | 1278  | 1167  | 2082  |
| Internal Medicine/Medicine    | 16576 | 15393 | 15612 | 18721 | 20557 | 18980 | 19473 | 22017 | 24366 | 24771 |
| Neurology                     | 1619  | 1813  | 2313  | 2554  | 2501  | 2809  | 2734  | 2635  | 2983  | 2344  |
| Neurosurgery                  | 298   | 241   | 127   | 0     | 0     | 105   | 0     | 318   | 454   | 328   |
| Obstetrics and Gynecology     | 279   | 171   | 313   | 640   | 779   | 742   | 953   | 771   | 1024  | 1114  |
| Ophthalmology                 | 0     | 0     | 0     | 131   | 0     | 0     | 145   | 253   | 260   | 145   |
| Orthopedics                   | 618   | 472   | 808   | 850   | 1105  | 885   | 750   | 615   | 700   | 588   |
| Otolaryngology                | 274   | 274   | 274   | 260   | 0     | 0     | 0     | 0     | 0     | 130   |
| Pathology                     | 1538  | 1635  | 1698  | 1500  | 1507  | 2011  | 2106  | 2359  | 2072  | 2764  |
| Pediatrics                    | 2485  | 2140  | 2285  | 2465  | 2174  | 3086  | 3156  | 3056  | 3452  | 3592  |
| Physical Medicine & Rehab     | 344   | 365   | 489   | 733   | 864   | 992   | 1686  | 1664  | 1336  | 1510  |
| Plastic Surgery               | 0     | 0     | 0     | 0     | 0     | 0     | 0     | 0     | 0     | 0     |
| Psychiatry                    | 12041 | 12151 | 11042 | 11433 | 10732 | 10180 | 10475 | 10189 | 11101 | 12219 |
| Radiation-Diagnostic/Oncology | 2091  | 1961  | 1517  | 1575  | 1710  | 1929  | 2705  | 2437  | 1931  | 1512  |
| Surgery                       | 999   | 861   | 1240  | 886   | 1353  | 1716  | 2081  | 1590  | 1374  | 1012  |
| Urology                       | 106   | 106   | 106   | 137   | 440   | 594   | 846   | 700   | 699   | 869   |
| K08                           | 2011  | 2012  | 2013  | 2014  | 2015  | 2016  | 2017  | 2018  | 2019  | 2020  |
| Anesthesiology                | 1636  | 1831  | 2071  | 2275  | 2120  | 2058  | 2662  | 3792  | 4516  | 3980  |
| Dermatology                   | 2225  | 2309  | 1938  | 1733  | 1802  | 1934  | 1958  | 1802  | 2016  | 1629  |
| Emergency Medicine            | 283   | 568   | 875   | 593   | 746   | 1091  | 1136  | 1284  | 1113  | 1121  |
| Family Medicine               | 611   | 616   | 678   | 275   | 148   | 146   | 168   | 168   | 515   | 504   |
| Internal Medicine/Medicine    | 37528 | 36346 | 33277 | 34241 | 32022 | 37178 | 37443 | 41602 | 46610 | 47123 |
| Neurology                     | 6333  | 5782  | 6588  | 5789  | 5803  | 5416  | 5683  | 5691  | 6525  | 7391  |
| Neurosurgery                  | 1160  | 1197  | 1446  | 1153  | 1658  | 1867  | 2222  | 2009  | 2370  | 1805  |
| Obstetrics and Gynecology     | 1072  | 1077  | 952   | 598   | 244   | 374   | 334   | 907   | 1110  | 1675  |
| Ophthalmology                 | 4904  | 5063  | 5336  | 6174  | 6111  | 5435  | 5502  | 5280  | 5054  | 4877  |
| Orthopedics                   | 179   | 269   | 519   | 438   | 485   | 871   | 1201  | 1031  | 847   | 990   |
| Otolaryngology                | 1995  | 2189  | 2122  | 1833  | 2265  | 2069  | 1684  | 1933  | 2167  | 1880  |
| Pathology                     | 4861  | 4286  | 4572  | 4859  | 4564  | 3929  | 3803  | 4681  | 4720  | 5225  |
| Pediatrics                    | 15014 | 13220 | 12960 | 12372 | 11670 | 13420 | 17141 | 19548 | 19397 | 18773 |
| Physical Medicine & Rehab     | 125   | 125   | 125   | 0     | 0     | 0     | 0     | 171   | 171   | 172   |
| Plastic Surgery               | 0     | 0     | 0     | 0     | 0     | 0     | 0     | 0     | 0     | 0     |
| Psychiatry                    | 5684  | 5023  | 3287  | 4502  | 3704  | 3895  | 4264  | 3698  | 3256  | 4261  |
| Radiation-Diagnostic/Oncology | 811   | 820   | 820   | 915   | 832   | 172   | 532   | 610   | 2888  | 3757  |
| Surgery                       | 7904  | 8045  | 6671  | 6572  | 5420  | 6127  | 6343  | 7333  | 7654  | 8321  |
| Urology                       | 1217  | 1197  | 1391  | 1060  | 662   | 824   | 843   | 830   | 1111  | 1098  |
| K23                           | 2011  | 2012  | 2013  | 2014  | 2015  | 2016  | 2017  | 2018  | 2019  | 2020  |
| Anesthesiology                | 1200  | 1558  | 1839  | 2035  | 1853  | 1538  | 2247  | 2154  | 3073  | 2977  |
| Dermatology                   | 368   | 491   | 252   | 123   | 257   | 669   | 694   | 1364  | 1557  | 1339  |
| Emergency Medicine            | 2344  | 2111  | 2311  | 2158  | 2213  | 3113  | 3733  | 3333  | 3579  | 2590  |
| Family Medicine               | 1388  | 1256  | 901   | 440   | 648   | 585   | 808   | 801   | 985   | 1100  |
| Internal Medicine/Medicine    | 44386 | 46176 | 45669 | 44077 | 40587 | 43388 | 43248 | 44087 | 44953 | 50235 |
| Neurology                     | 8996  | 8961  | 7778  | 8382  | 8632  | 7030  | 8764  | 9346  | 10301 | 10534 |
| Neurosurgery                  | 372   | 712   | 922   | 695   | 840   | 727   | 734   | 735   | 927   | 1123  |
| Obstetrics and Gynecology     | 1602  | 1806  | 1387  | 1695  | 1160  | 648   | 1143  | 1352  | 1734  | 2034  |
| Ophthalmology                 | 2853  | 2347  | 2644  | 2238  | 2693  | 4070  | 4562  | 4059  | 4513  | 4234  |
| Orthopedics                   | 337   | 391   | 320   | 318   | 195   | 347   | 173   | 369   | 494   | 548   |
| Otolaryngology                | 1485  | 1252  | 1235  | 1902  | 2599  | 2144  | 2433  | 2431  | 2297  | 1823  |
| Pathology                     | 517   | 400   | 265   | 405   | 277   | 137   | 146   | 142   | 190   | 528   |
| Pediatrics                    | 12950 | 12743 | 12301 | 12112 | 10974 | 10253 | 14883 | 16378 | 18825 | 22283 |
| Physical Medicine & Rehab     | 994   | 943   | 1511  | 1638  | 1305  | 1231  | 992   | 270   | 454   | 442   |
| Plastic Surgery               | 0     | 0     | 0     | 0     | 0     | 0     | 0     | 0     | 0     | 0     |
| Psychiatry                    | 19068 | 18203 | 16841 | 16115 | 15647 | 15318 | 18084 | 17910 | 19349 | 19642 |
| Radiation-Diagnostic/Oncology | 952   | 659   | 632   | 650   | 647   | 694   | 723   | 359   | 196   | 578   |
| Surgery                       | 1704  | 1671  | 1479  | 1572  | 1469  | 1940  | 1610  | 1465  | 1556  | 2246  |
| Urology                       | 314   | 154   | 297   | 465   | 301   | 436   | 312   | 144   | 505   | 503   |

Inflation-Adjusted Total NIH career development grant (K01, K08, K23) funding in thousands of dollars from 2011-2020 by specialty

| K01                        | 2011  | 2012  | 2013  | 2014  | 2015  | 2016  | 2017  | 2018  | 2019  | 2020  |
|----------------------------|-------|-------|-------|-------|-------|-------|-------|-------|-------|-------|
| Anesthesiology             | 480   | 476   | 446   | 580   | 827   | 824   | 940   | 1077  | 573   | 854   |
| Dermatology                | 375   | 459   | 575   | 421   | 605   | 723   | 1167  | 1194  | 900   | 810   |
| Emergency Medicine         | 0     | 134   | 129   | 125   | 258   | 0     | 0     | 37    | 107   | 213   |
| Family Medicine            | 1241  | 1533  | 1140  | 848   | 870   | 994   | 990   | 1138  | 1019  | 1795  |
| Internal Medicine/Medicine | 16576 | 15116 | 15055 | 17711 | 19228 | 17607 | 17748 | 19610 | 21286 | 21356 |
| Neurology                  | 1619  | 1780  | 2231  | 2416  | 2339  | 2606  | 2492  | 2347  | 2606  | 2021  |

|                               |             |             |             |             |             |             |             |             |             |             |
|-------------------------------|-------------|-------------|-------------|-------------|-------------|-------------|-------------|-------------|-------------|-------------|
| Neurosurgery                  | 298         | 237         | 122         | 0           | 0           | 97          | 0           | 283         | 397         | 283         |
| Obstetrics and Gynecology     | 279         | 168         | 302         | 605         | 729         | 688         | 869         | 687         | 895         | 960         |
| Ophthalmology                 | 0           | 0           | 0           | 124         | 0           | 0           | 132         | 225         | 227         | 125         |
| Orthopedics                   | 618         | 464         | 779         | 804         | 1034        | 821         | 684         | 548         | 612         | 507         |
| Otolaryngology                | 274         | 269         | 264         | 246         | 0           | 0           | 0           | 0           | 0           | 112         |
| Pathology                     | 1538        | 1606        | 1637        | 1419        | 1410        | 1866        | 1919        | 2101        | 1810        | 2383        |
| Pediatrics                    | 2485        | 2102        | 2204        | 2332        | 2033        | 2863        | 2876        | 2722        | 3016        | 3097        |
| Physical Medicine & Rehab     | 344         | 358         | 472         | 693         | 808         | 920         | 1537        | 1482        | 1167        | 1302        |
| Plastic Surgery               | 0           | 0           | 0           | 0           | 0           | 0           | 0           | 0           | 0           | 0           |
| Psychiatry                    | 12041       | 11933       | 10648       | 10816       | 10038       | 9444        | 9547        | 9075        | 9698        | 10535       |
| Radiation-Diagnostic/Oncology | 2091        | 1926        | 1463        | 1490        | 1599        | 1789        | 2465        | 2171        | 1687        | 1304        |
| Surgery                       | 999         | 846         | 1196        | 838         | 1266        | 1592        | 1897        | 1416        | 1200        | 872         |
| Urology                       | 106         | 104         | 102         | 130         | 412         | 551         | 771         | 623         | 611         | 749         |
| <b>K08</b>                    | <b>2011</b> | <b>2012</b> | <b>2013</b> | <b>2014</b> | <b>2015</b> | <b>2016</b> | <b>2017</b> | <b>2018</b> | <b>2019</b> | <b>2020</b> |
| Anesthesiology                | 1636        | 1798        | 1997        | 2152        | 1983        | 1909        | 2426        | 3377        | 3945        | 3431        |
| Dermatology                   | 2225        | 2268        | 1869        | 1639        | 1686        | 1794        | 1785        | 1605        | 1761        | 1404        |
| Emergency Medicine            | 283         | 558         | 844         | 561         | 698         | 1012        | 1035        | 1144        | 972         | 966         |
| Family Medicine               | 611         | 605         | 654         | 260         | 138         | 135         | 153         | 150         | 450         | 435         |
| Internal Medicine/Medicine    | 37528       | 35693       | 32091       | 32393       | 29952       | 34489       | 34127       | 37054       | 40718       | 40627       |
| Neurology                     | 6333        | 5678        | 6353        | 5477        | 5428        | 5024        | 5180        | 5069        | 5700        | 6372        |
| Neurosurgery                  | 1160        | 1175        | 1394        | 1091        | 1551        | 1732        | 2025        | 1789        | 2070        | 1556        |
| Obstetrics and Gynecology     | 1072        | 1058        | 918         | 566         | 228         | 347         | 304         | 808         | 970         | 1444        |
| Ophthalmology                 | 4904        | 4972        | 5146        | 5841        | 5716        | 5042        | 5015        | 4703        | 4415        | 4205        |
| Orthopedics                   | 179         | 264         | 500         | 414         | 454         | 808         | 1095        | 918         | 740         | 854         |
| Otolaryngology                | 1995        | 2150        | 2046        | 1734        | 1919        | 1519        | 1535        | 1722        | 1893        | 1621        |
| Pathology                     | 4861        | 4209        | 4409        | 4597        | 4269        | 3645        | 3466        | 4169        | 4123        | 4505        |
| Pediatrics                    | 15014       | 12982       | 12498       | 11704       | 10916       | 12449       | 15623       | 17411       | 16945       | 16185       |
| Physical Medicine & Rehab     | 125         | 123         | 121         | 0           | 0           | 0           | 0           | 152         | 149         | 148         |
| Plastic Surgery               | 0           | 0           | 0           | 0           | 0           | 0           | 0           | 0           | 0           | 0           |
| Psychiatry                    | 5684        | 4933        | 3170        | 4259        | 3465        | 3613        | 3886        | 3294        | 2844        | 3674        |
| Radiation-Diagnostic/Oncology | 811         | 805         | 791         | 866         | 778         | 160         | 485         | 543         | 2523        | 3239        |
| Surgery                       | 7904        | 7900        | 6433        | 6217        | 5070        | 5684        | 5781        | 6531        | 6686        | 7174        |
| Urology                       | 1217        | 1175        | 1341        | 1003        | 619         | 764         | 768         | 739         | 971         | 947         |
| <b>K23</b>                    | <b>2011</b> | <b>2012</b> | <b>2013</b> | <b>2014</b> | <b>2015</b> | <b>2016</b> | <b>2017</b> | <b>2018</b> | <b>2019</b> | <b>2020</b> |
| Anesthesiology                | 1200        | 1530        | 1773        | 1925        | 1733        | 1427        | 2048        | 1919        | 2685        | 2567        |
| Dermatology                   | 368         | 482         | 243         | 116         | 240         | 621         | 633         | 1215        | 1360        | 1154        |
| Emergency Medicine            | 2344        | 2073        | 2229        | 2042        | 2070        | 2888        | 3402        | 2969        | 3127        | 2233        |
| Family Medicine               | 1388        | 1233        | 869         | 416         | 606         | 543         | 736         | 713         | 860         | 948         |
| Internal Medicine/Medicine    | 44386       | 45346       | 44041       | 41699       | 37963       | 40250       | 39418       | 39267       | 39270       | 43310       |
| Neurology                     | 8996        | 8800        | 7501        | 7930        | 8074        | 6522        | 7988        | 8324        | 8999        | 9082        |
| Neurosurgery                  | 372         | 699         | 889         | 657         | 786         | 674         | 669         | 655         | 810         | 968         |
| Obstetrics and Gynecology     | 1602        | 1774        | 1338        | 1604        | 1085        | 601         | 1042        | 1204        | 1515        | 1754        |
| Ophthalmology                 | 2853        | 2305        | 2550        | 2117        | 2519        | 3776        | 4158        | 3615        | 3942        | 3650        |
| Orthopedics                   | 337         | 384         | 309         | 301         | 182         | 322         | 158         | 329         | 432         | 472         |
| Otolaryngology                | 1485        | 1229        | 1191        | 1799        | 2431        | 1989        | 2218        | 2165        | 2007        | 1572        |
| Pathology                     | 517         | 393         | 256         | 383         | 259         | 127         | 133         | 126         | 166         | 455         |
| Pediatrics                    | 12950       | 12514       | 11862       | 11458       | 10265       | 9511        | 13565       | 14588       | 16445       | 19211       |
| Physical Medicine & Rehab     | 994         | 926         | 1457        | 1550        | 1221        | 1142        | 904         | 240         | 397         | 381         |
| Plastic Surgery               | 0           | 0           | 0           | 0           | 0           | 0           | 0           | 0           | 0           | 0           |
| Psychiatry                    | 19068       | 17876       | 16241       | 15245       | 14635       | 14210       | 16482       | 15952       | 16903       | 16934       |
| Radiation-Diagnostic/Oncology | 952         | 647         | 609         | 615         | 605         | 644         | 659         | 320         | 171         | 498         |
| Surgery                       | 1704        | 1641        | 1426        | 1487        | 1374        | 1800        | 1467        | 1305        | 1359        | 1936        |
| Urology                       | 314         | 151         | 286         | 440         | 282         | 404         | 284         | 128         | 441         | 434         |

Supplementary Table 9: Total NIH advanced career grant (R01, R03, R21, P30, U01) funding in thousands of dollars from 2011-2020 by specialty

|                               |             |             |             |             |             |             |             |             |             |             |
|-------------------------------|-------------|-------------|-------------|-------------|-------------|-------------|-------------|-------------|-------------|-------------|
| <b>R01</b>                    | <b>2011</b> | <b>2012</b> | <b>2013</b> | <b>2014</b> | <b>2015</b> | <b>2016</b> | <b>2017</b> | <b>2018</b> | <b>2019</b> | <b>2020</b> |
| Anesthesiology                | 74515       | 84338       | 81634       | 88148       | 84338       | 85814       | 88443       | 105316      | 110591      | 120792      |
| Dermatology                   | 39821       | 43881       | 41550       | 39382       | 39803       | 42030       | 39871       | 48634       | 50513       | 49680       |
| Emergency Medicine            | 12119       | 12903       | 13802       | 15519       | 16628       | 18528       | 21356       | 24195       | 31063       | 40629       |
| Family Medicine               | 37541       | 41499       | 36942       | 33725       | 38982       | 38711       | 38849       | 45070       | 45999       | 52595       |
| Internal Medicine/Medicine    | 1291238     | 1251856     | 1150256     | 1184510     | 1191770     | 1289757     | 1394581     | 1518667     | 1645808     | 1793562     |
| Neurology                     | 213323      | 221996      | 213488      | 217259      | 219583      | 245691      | 282468      | 336910      | 347790      | 416638      |
| Neurosurgery                  | 48188       | 50932       | 46894       | 47635       | 61235       | 65217       | 69463       | 77096       | 85492       | 97974       |
| Obstetrics and Gynecology     | 50170       | 47030       | 47914       | 48015       | 52140       | 63774       | 75443       | 79065       | 97330       | 115259      |
| Ophthalmology                 | 143557      | 146741      | 143466      | 156156      | 147880      | 147840      | 157163      | 169590      | 186335      | 198853      |
| Orthopedics                   | 37635       | 40769       | 44058       | 44466       | 42092       | 47136       | 51958       | 55502       | 60828       | 70145       |
| Otolaryngology                | 51992       | 55813       | 56307       | 58138       | 63423       | 63655       | 67549       | 78620       | 91749       | 91134       |
| Pathology                     | 324176      | 318396      | 294584      | 279372      | 287786      | 295775      | 297770      | 33357       | 360175      | 387211      |
| Pediatrics                    | 312475      | 336173      | 311585      | 323344      | 314062      | 312097      | 29934       | 325846      | 344660      | 393939      |
| Physical Medicine & Rehab     | 11247       | 13076       | 13203       | 15088       | 13669       | 17536       | 23490       | 27050       | 28451       | 30755       |
| Plastic Surgery               | 967         | 0           | 537         | 302         | 0           | 0           | 333         | 0           | 284         | 0           |
| Psychiatry                    | 470253      | 459342      | 406053      | 420040      | 400779      | 431651      | 45470       | 494086      | 510676      | 54599       |
| Radiation-Diagnostic/Oncology | 205633      | 208397      | 202747      | 201325      | 211587      | 231175      | 256833      | 293765      | 305237      | 311946      |
| Surgery                       | 146686      | 140198      | 127421      | 134551      | 142824      | 145184      | 162932      | 176766      | 202367      | 229416      |
| Urology                       | 24013       | 25102       | 25021       | 23243       | 21703       | 20603       | 23240       | 24148       | 25147       | 28303       |
| <b>R03</b>                    | <b>2011</b> | <b>2012</b> | <b>2013</b> | <b>2014</b> | <b>2015</b> | <b>2016</b> | <b>2017</b> | <b>2018</b> | <b>2019</b> | <b>2020</b> |
| Anesthesiology                | 450081      | 721092      | 442962      | 532855      | 322574      | 308213      | 386668      | 763750      | 792285      | 627476      |
| Dermatology                   | 325896      | 415990      | 151115      | 318146      | 629917      | 704687      | 535792      | 310250      | 389937      | 515420      |
| Emergency Medicine            | 63905       | 86342       | 68643       | 114000      | 41539       | 415491      | 451612      | 350895      | 194750      | 345317      |
| Family Medicine               | 736834      | 719578      | 845671      | 507967      | 429418      | 40752       | 155583      | 179250      | 552565      | 412944      |
| Internal Medicine/Medicine    | 9494800     | 11557791    | 10699669    | 10753491    | 9694220     | 7907586     | 7842786     | 8562404     | 11413933    | 1302676     |



|                               |             |             |             |             |             |             |             |             |             |             |
|-------------------------------|-------------|-------------|-------------|-------------|-------------|-------------|-------------|-------------|-------------|-------------|
| Neurology                     | 96465       | 656875      | 855875      | 1051369     | 1257543     | 1688365     | 1381103     | 1185473     | 1536028     | 1461973     |
| Neurosurgery                  | 39134       | 780722      | 767885      | 386897      | 593779      | 357615      | 16180       | 161079      | 160250      | 565458      |
| Obstetrics and Gynecology     | 600862      | 864239      | 764424      | 803596      | 746483      | 1003704     | 1331211     | 139082      | 1124544     | 764667      |
| Ophthalmology                 | 0           | 0           | 0           | 195625      | 271238      | 81000       | 117750      | 19400       | 322473      | 329957      |
| Orthopedics                   | 816678      | 787365      | 876856      | 1189895     | 818017      | 500294      | 231895      | 359624      | 739085      | 632940      |
| Otolaryngology                | 1718440     | 2272345     | 2379761     | 1968522     | 1885934     | 1684593     | 1797130     | 1311104     | 320436      | 474811      |
| Pathology                     | 1925448     | 1586299     | 1437747     | 1451656     | 1241119     | 736439      | 1033500     | 1799423     | 2429442     | 2721395     |
| Pediatrics                    | 2921374     | 2413639     | 2699566     | 2605049     | 302260      | 4009767     | 3103581     | 3812411     | 321513      | 370533      |
| Physical Medicine & Rehab     | 672323      | 544268      | 461397      | 600245      | 412624      | 395279      | 172249      | 491150      | 839096      | 725944      |
| Plastic Surgery               | 0           | 0           | 0           | 0           | 0           | 77000       | 77625       | 0           | 0           | 0           |
| Psychiatry                    | 2652569     | 2711582     | 2647613     | 2383628     | 2119936     | 2248675     | 2639599     | 211641      | 1885175     | 1799338     |
| Radiation-Diagnostic/Oncology | 783679      | 518000      | 742731      | 1377746     | 1544365     | 72650       | 928242      | 1578939     | 2227240     | 212738      |
| Surgery                       | 1364197     | 1739046     | 1377657     | 1564172     | 1504562     | 1191847     | 2115365     | 1802267     | 102415      | 1631792     |
| Urology                       | 78000       | 240620      | 153455      | 355604      | 471148      | 299855      | 81000       | 84750       | 285251      | 382561      |
| <b>R21</b>                    | <b>2011</b> | <b>2012</b> | <b>2013</b> | <b>2014</b> | <b>2015</b> | <b>2016</b> | <b>2017</b> | <b>2018</b> | <b>2019</b> | <b>2020</b> |
| Anesthesiology                | 5363        | 4959        | 5614        | 5048        | 6017        | 6011        | 5305        | 7608        | 9044        | 7261        |
| Dermatology                   | 3480        | 3878        | 3706        | 4881        | 3694        | 2887        | 3101        | 3214        | 3172        | 4305        |
| Emergency Medicine            | 1418        | 1238        | 677         | 1135        | 1061        | 859         | 1056        | 1709        | 1601        | 1225        |
| Family Medicine               | 2736        | 3339        | 3520        | 3912        | 4672        | 4043        | 2436        | 2462        | 2749        | 3270        |
| Internal Medicine/Medicine    | 77517       | 82201       | 76486       | 74078       | 74281       | 79671       | 76564       | 76594       | 77444       | 84910       |
| Neurology                     | 12904       | 15721       | 14688       | 14878       | 15211       | 16928       | 17462       | 19479       | 25806       | 20145       |
| Neurosurgery                  | 2414        | 3721        | 4435        | 4831        | 7289        | 7888        | 5719        | 5571        | 11745       | 10119       |
| Obstetrics and Gynecology     | 6800        | 5278        | 5734        | 4890        | 5247        | 4730        | 4449        | 5749        | 6279        | 9901        |
| Ophthalmology                 | 3884        | 3860        | 5863        | 5643        | 8032        | 6662        | 4941        | 6515        | 11474       | 11215       |
| Orthopedics                   | 2763        | 3619        | 3394        | 2686        | 2878        | 2916        | 5150        | 7074        | 4837        | 5113        |
| Otolaryngology                | 2673        | 3242        | 4612        | 5060        | 4484        | 2935        | 2973        | 5233        | 5598        | 6832        |
| Pathology                     | 24267       | 21316       | 22457       | 28845       | 33013       | 33180       | 28281       | 24359       | 24053       | 25734       |
| Pediatrics                    | 19943       | 19426       | 19820       | 22098       | 24760       | 24980       | 23663       | 24697       | 27382       | 30329       |
| Physical Medicine & Rehab     | 781         | 1430        | 2185        | 1664        | 700         | 1979        | 2772        | 2106        | 2839        | 2457        |
| Plastic Surgery               | 0           | 0           | 0           | 0           | 0           | 0           | 0           | 0           | 0           | 0           |
| Psychiatry                    | 25223       | 34861       | 38259       | 36372       | 31818       | 31144       | 31685       | 31006       | 33529       | 39248       |
| Radiation-Diagnostic/Oncology | 20438       | 21778       | 20271       | 23694       | 25496       | 24020       | 22735       | 18066       | 21872       | 24859       |
| Surgery                       | 11149       | 10662       | 8942        | 10237       | 12823       | 13371       | 9947        | 9617        | 10320       | 12471       |
| Urology                       | 1626        | 1730        | 838         | 740         | 1802        | 2463        | 1761        | 1385        | 1519        | 2247        |
| <b>P30</b>                    | <b>2011</b> | <b>2012</b> | <b>2013</b> | <b>2014</b> | <b>2015</b> | <b>2016</b> | <b>2017</b> | <b>2018</b> | <b>2019</b> | <b>2020</b> |
| Anesthesiology                | 0           | 0           | 0           | 1000        | 0           | 0           | 0           | 0           | 0           | 0           |
| Dermatology                   | 5597        | 4335        | 6056        | 6889        | 6479        | 7431        | 6547        | 3292        | 3102        | 3109        |
| Emergency Medicine            | 0           | 0           | 0           | 0           | 0           | 0           | 0           | 0           | 0           | 0           |
| Family Medicine               | 0           | 480         | 473         | 475         | 475         | 475         | 1499        | 1632        | 2024        | 2317        |
| Internal Medicine/Medicine    | 296235      | 320454      | 339482      | 395655      | 359149      | 370938      | 382260      | 390765      | 453863      | 491128      |
| Neurology                     | 13644       | 15063       | 13998       | 12964       | 13371       | 14593       | 14617       | 16643       | 21105       | 49014       |
| Neurosurgery                  | 1890        | 2651        | 2501        | 1789        | 1749        | 638         | 625         | 612         | 698         | 0           |
| Obstetrics and Gynecology     | 5801        | 5801        | 5158        | 5379        | 5786        | 5762        | 0           | 2477        | 2907        | 5170        |
| Ophthalmology                 | 18749       | 21609       | 17624       | 17284       | 16661       | 15685       | 15703       | 17556       | 17588       | 17215       |
| Orthopedics                   | 2502        | 2510        | 2391        | 3072        | 3059        | 3517        | 3485        | 3459        | 4536        | 4510        |
| Otolaryngology                | 4978        | 4832        | 4602        | 4455        | 2996        | 2292        | 615         | 5495        | 5130        | 7681        |
| Pathology                     | 24994       | 17233       | 36305       | 36242       | 33708       | 42777       | 35624       | 14090       | 12858       | 16375       |
| Pediatrics                    | 26289       | 23223       | 22244       | 17069       | 16976       | 14906       | 14370       | 10935       | 11681       | 17155       |
| Physical Medicine & Rehab     | 0           | 0           | 0           | 0           | 0           | 0           | 0           | 0           | 0           | 0           |
| Plastic Surgery               | 0           | 0           | 0           | 0           | 0           | 0           | 0           | 0           | 0           | 0           |
| Psychiatry                    | 17668       | 17159       | 19520       | 16179       | 18316       | 13464       | 11666       | 9558        | 8712        | 9759        |
| Radiation-Diagnostic/Oncology | 2851        | 3786        | 4292        | 5930        | 11823       | 6816        | 8877        | 8628        | 11308       | 12897       |
| Surgery                       | 25238       | 21484       | 24298       | 15973       | 25296       | 25363       | 37629       | 34242       | 29825       | 42739       |
| Urology                       | 4835        | 4726        | 3941        | 5304        | 5342        | 6332        | 0           | 0           | 0           | 0           |
| <b>U01</b>                    | <b>2011</b> | <b>2012</b> | <b>2013</b> | <b>2014</b> | <b>2015</b> | <b>2016</b> | <b>2017</b> | <b>2018</b> | <b>2019</b> | <b>2020</b> |
| Anesthesiology                | 3304        | 3157        | 3516        | 6975        | 5936        | 12086       | 9053        | 8374        | 11426       | 10257       |
| Dermatology                   | 810         | 2506        | 2458        | 2239        | 4082        | 2749        | 3182        | 3562        | 8176        | 5268        |
| Emergency Medicine            | 18243       | 16875       | 8205        | 7022        | 4410        | 3305        | 6454        | 25263       | 1974        | 14284       |
| Family Medicine               | 5269        | 8212        | 8912        | 9833        | 11830       | 9649        | 6264        | 8843        | 9972        | 8087        |
| Internal Medicine/Medicine    | 394866      | 38472       | 42765       | 416081      | 369849      | 355612      | 392159      | 420565      | 616327      | 698031      |
| Neurology                     | 61745       | 68819       | 71516       | 79220       | 64682       | 87852       | 70398       | 111816      | 102885      | 139249      |
| Neurosurgery                  | 4610        | 4594        | 15655       | 15038       | 11441       | 25764       | 27265       | 13884       | 6841        | 5592        |
| Obstetrics and Gynecology     | 25401       | 17051       | 5216        | 11010       | 47414       | 9749        | 8790        | 12287       | 8037        | 8465        |
| Ophthalmology                 | 2346        | 2450        | 1937        | 1356        | 2967        | 3727        | 3876        | 6158        | 6809        | 7941        |
| Orthopedics                   | 0           | 0           | 522         | 657         | 197         | 197         | 0           | 0           | 705         | 648         |
| Otolaryngology                | 1413        | 830         | 1142        | 1049        | 2611        | 2399        | 2901        | 4027        | 2151        | 3110        |
| Pathology                     | 45262       | 29680       | 27222       | 19653       | 19641       | 24847       | 27061       | 32524       | 29907       | 32182       |
| Pediatrics                    | 98053       | 99346       | 91102       | 101082      | 94017       | 85032       | 84977       | 87933       | 82760       | 73893       |
| Physical Medicine & Rehab     | 569         | 622         | 3799        | 3484        | 3891        | 3623        | 3575        | 1940        | 5081        | 7806        |
| Plastic Surgery               | 0           | 0           | 0           | 0           | 0           | 0           | 0           | 430         | 430         | 430         |
| Psychiatry                    | 41548       | 58726       | 53470       | 60941       | 67383       | 59380       | 51370       | 58615       | 92704       | 78939       |
| Radiation-Diagnostic/Oncology | 6629        | 8597        | 13873       | 17159       | 19558       | 17338       | 35114       | 37462       | 39601       | 38376       |
| Surgery                       | 29433       | 39199       | 38813       | 34289       | 40167       | 35721       | 31847       | 39184       | 40171       | 32722       |
| Urology                       | 13453       | 11343       | 11810       | 7735        | 6550        | 7265        | 7641        | 6918        | 10617       | 5158        |

Inflation-Adjusted Total NIH advanced career grant (R01, R03, R21, P30, U01) funding in thousands of dollars from 2011-2020 by specialty

|                    |             |             |             |             |             |             |             |             |             |             |
|--------------------|-------------|-------------|-------------|-------------|-------------|-------------|-------------|-------------|-------------|-------------|
| <b>R01</b>         | <b>2011</b> | <b>2012</b> | <b>2013</b> | <b>2014</b> | <b>2015</b> | <b>2016</b> | <b>2017</b> | <b>2018</b> | <b>2019</b> | <b>2020</b> |
| Anesthesiology     | 74515       | 82822       | 78723       | 83392       | 78886       | 79607       | 80610       | 93803       | 96611       | 104140      |
| Dermatology        | 39821       | 43092       | 40669       | 37257       | 37230       | 38990       | 36340       | 43317       | 44127       | 42831       |
| Emergency Medicine | 12119       | 12671       | 13310       | 14682       | 15553       | 17188       | 19465       | 21550       | 27136       | 35028       |
| Family Medicine    | 37541       | 40753       | 35625       | 31905       | 36462       | 35911       | 35408       | 40143       | 40184       | 45344       |

|                               |             |             |             |             |             |             |             |             |             |             |
|-------------------------------|-------------|-------------|-------------|-------------|-------------|-------------|-------------|-------------|-------------|-------------|
| Internal Medicine/Medicine    | 1291238     | 1229358     | 1109245     | 1120596     | 1114722     | 1196474     | 1271073     | 1352645     | 1437753     | 1546304     |
| Neurology                     | 213323      | 218006      | 205876      | 205536      | 205387      | 227921      | 257452      | 300079      | 303824      | 359201      |
| Neurosurgery                  | 48188       | 50017       | 45222       | 45065       | 52726       | 60500       | 63311       | 68668       | 74685       | 84467       |
| Obstetrics and Gynecology     | 50170       | 46185       | 46206       | 45424       | 48769       | 59162       | 68762       | 70422       | 85026       | 99370       |
| Ophthalmology                 | 143557      | 144104      | 138351      | 147730      | 138320      | 137147      | 143244      | 151050      | 162779      | 171439      |
| Orthopedics                   | 37635       | 40036       | 42487       | 42067       | 39371       | 43727       | 47356       | 49434       | 53138       | 60475       |
| Otolaryngology                | 51992       | 54810       | 54299       | 55001       | 59323       | 59051       | 61567       | 70025       | 80151       | 78570       |
| Pathology                     | 324176      | 312674      | 284081      | 264298      | 269181      | 274383      | 271399      | 29710       | 314643      | 333831      |
| Pediatrics                    | 312475      | 330131      | 300476      | 305897      | 293758      | 289524      | 27283       | 290224      | 301090      | 339631      |
| Physical Medicine & Rehab     | 11247       | 12841       | 12732       | 14274       | 12785       | 16268       | 21410       | 24093       | 24854       | 26515       |
| Plastic Surgery               | 967         | 0           | 518         | 286         | 0           | 0           | 304         | 0           | 248         | 0           |
| Psychiatry                    | 470253      | 451087      | 391576      | 397375      | 374869      | 400432      | 414312      | 440072      | 446119      | 47072       |
| Radiation-Diagnostic/Oncology | 205633      | 204652      | 195518      | 190462      | 197908      | 214455      | 234087      | 261650      | 266650      | 268941      |
| Surgery                       | 146686      | 137678      | 122878      | 127291      | 133590      | 134683      | 148502      | 157442      | 176785      | 197789      |
| Urology                       | 24013       | 24651       | 24129       | 21989       | 20300       | 19113       | 21182       | 21508       | 21968       | 24401       |
| <b>R03</b>                    | <b>2011</b> | <b>2012</b> | <b>2013</b> | <b>2014</b> | <b>2015</b> | <b>2016</b> | <b>2017</b> | <b>2018</b> | <b>2019</b> | <b>2020</b> |
| Anesthesiology                | 450081      | 708133      | 427169      | 504103      | 301720      | 285921      | 352424      | 680256      | 692128      | 540973      |
| Dermatology                   | 325896      | 408514      | 145727      | 300979      | 589193      | 653720      | 488341      | 276333      | 340643      | 444365      |
| Emergency Medicine            | 63905       | 84790       | 66196       | 107849      | 38853       | 385440      | 411616      | 312535      | 170131      | 297712      |
| Family Medicine               | 736834      | 706646      | 815519      | 480558      | 401656      | 37805       | 141804      | 159654      | 482712      | 356016      |
| Internal Medicine/Medicine    | 9494800     | 11350077    | 10318182    | 10173250    | 9067487     | 7335664     | 7148206     | 7626355     | 9971038     | 1123091     |
| Neurology                     | 96465       | 645070      | 825360      | 994639      | 1176243     | 1566253     | 1258789     | 1055876     | 1341851     | 1260427     |
| Neurosurgery                  | 39134       | 766691      | 740507      | 366021      | 555391      | 331750      | 14747       | 143470      | 139992      | 487505      |
| Obstetrics and Gynecology     | 600862      | 848707      | 737169      | 760235      | 698223      | 931110      | 1213315     | 123877      | 982384      | 659251      |
| Ophthalmology                 | 0           | 0           | 0           | 185069      | 253702      | 75142       | 107322      | 17279       | 281707      | 284470      |
| Orthopedics                   | 816678      | 773215      | 845592      | 1125690     | 765132      | 464110      | 211358      | 320310      | 645653      | 545684      |
| Otolaryngology                | 1718440     | 2231507     | 2294913     | 1862304     | 1764008     | 1562754     | 1637971     | 1167773     | 279928      | 409354      |
| Pathology                     | 1925448     | 1557790     | 1386485     | 1373327     | 1160880     | 683176      | 941970      | 1602709     | 2122323     | 2346227     |
| Pediatrics                    | 2921374     | 2370262     | 2603315     | 2464485     | 282719      | 3719758     | 2828719     | 3395635     | 280869      | 319452      |
| Physical Medicine & Rehab     | 672323      | 534487      | 444946      | 567857      | 385948      | 366690      | 156994      | 437457      | 733021      | 625866      |
| Plastic Surgery               | 0           | 0           | 0           | 0           | 0           | 71431       | 70750       | 0           | 0           | 0           |
| Psychiatry                    | 2652569     | 2662850     | 2553215     | 2255011     | 1982882     | 2086038     | 2405828     | 188504      | 1646860     | 1551283     |
| Radiation-Diagnostic/Oncology | 783679      | 508691      | 716250      | 1303405     | 1444522     | 67396       | 846034      | 1406328     | 1945683     | 183410      |
| Surgery                       | 1364197     | 1707792     | 1328538     | 1479772     | 1407292     | 1105646     | 1928022     | 1605242     | 89468       | 1406835     |
| Urology                       | 78000       | 236296      | 147984      | 336416      | 440688      | 278168      | 73826       | 75485       | 249191      | 329822      |
| <b>R21</b>                    | <b>2011</b> | <b>2012</b> | <b>2013</b> | <b>2014</b> | <b>2015</b> | <b>2016</b> | <b>2017</b> | <b>2018</b> | <b>2019</b> | <b>2020</b> |
| Anesthesiology                | 5363        | 4870        | 5434        | 4776        | 5628        | 5576        | 4835        | 6776        | 7901        | 6260        |
| Dermatology                   | 3480        | 3808        | 3574        | 4618        | 3455        | 2678        | 2826        | 2863        | 2771        | 3712        |
| Emergency Medicine            | 1418        | 1216        | 653         | 1074        | 992         | 797         | 962         | 1522        | 1399        | 1056        |
| Family Medicine               | 2736        | 3279        | 3394        | 3701        | 4370        | 3751        | 2220        | 2193        | 2401        | 2819        |
| Internal Medicine/Medicine    | 77517       | 80724       | 73759       | 70081       | 69479       | 73909       | 69783       | 68221       | 67654       | 73204       |
| Neurology                     | 12904       | 15438       | 14164       | 14075       | 14228       | 15704       | 15916       | 17350       | 22544       | 17368       |
| Neurosurgery                  | 2414        | 3654        | 4277        | 4570        | 6818        | 7317        | 5213        | 4962        | 10260       | 8724        |
| Obstetrics and Gynecology     | 6800        | 5183        | 5530        | 4626        | 4908        | 4388        | 4055        | 5121        | 5485        | 8536        |
| Ophthalmology                 | 3884        | 3791        | 5654        | 5339        | 7513        | 6180        | 4503        | 5803        | 10024       | 9669        |
| Orthopedics                   | 2763        | 3554        | 3273        | 2541        | 2692        | 2705        | 4694        | 6301        | 4226        | 4408        |
| Otolaryngology                | 2673        | 3184        | 4448        | 4787        | 4194        | 2723        | 2710        | 4661        | 4890        | 5890        |
| Pathology                     | 24267       | 20933       | 21656       | 27289       | 30879       | 30780       | 25776       | 21696       | 21012       | 22186       |
| Pediatrics                    | 19943       | 19077       | 19113       | 20906       | 23159       | 23173       | 21567       | 21997       | 23920       | 26148       |
| Physical Medicine & Rehab     | 781         | 1404        | 2107        | 1574        | 655         | 1836        | 2527        | 1876        | 2480        | 2118        |
| Plastic Surgery               | 0           | 0           | 0           | 0           | 0           | 0           | 0           | 0           | 0           | 0           |
| Psychiatry                    | 25223       | 34234       | 36895       | 34409       | 29761       | 28891       | 28879       | 27616       | 29290       | 33837       |
| Radiation-Diagnostic/Oncology | 20438       | 21387       | 19548       | 22416       | 23848       | 22283       | 20722       | 16091       | 19107       | 21432       |
| Surgery                       | 11149       | 10470       | 8623        | 9685        | 11994       | 12404       | 9066        | 8566        | 9015        | 10752       |
| Urology                       | 1626        | 1699        | 808         | 700         | 1686        | 2285        | 1605        | 1234        | 1327        | 1937        |
| <b>P30</b>                    | <b>2011</b> | <b>2012</b> | <b>2013</b> | <b>2014</b> | <b>2015</b> | <b>2016</b> | <b>2017</b> | <b>2018</b> | <b>2019</b> | <b>2020</b> |
| Anesthesiology                | 0           | 0           | 0           | 946         | 0           | 0           | 0           | 0           | 0           | 0           |
| Dermatology                   | 5597        | 4257        | 5840        | 6517        | 6060        | 6894        | 5967        | 2932        | 2710        | 2680        |
| Emergency Medicine            | 0           | 0           | 0           | 0           | 0           | 0           | 0           | 0           | 0           | 0           |
| Family Medicine               | 0           | 471         | 456         | 449         | 444         | 441         | 1366        | 1454        | 1768        | 1998        |
| Internal Medicine/Medicine    | 296235      | 314695      | 327378      | 374306      | 335930      | 344110      | 348406      | 348046      | 396488      | 423422      |
| Neurology                     | 13644       | 14792       | 13499       | 12264       | 12507       | 13538       | 13322       | 14824       | 18437       | 42257       |
| Neurosurgery                  | 1890        | 2603        | 2412        | 1692        | 1636        | 592         | 570         | 545         | 610         | 0           |
| Obstetrics and Gynecology     | 5801        | 5697        | 4974        | 5089        | 5412        | 5345        | 0           | 2206        | 2540        | 4457        |
| Ophthalmology                 | 18749       | 21221       | 16996       | 16351       | 15584       | 14551       | 14312       | 15637       | 15365       | 14842       |
| Orthopedics                   | 2502        | 2465        | 2306        | 2906        | 2861        | 3263        | 3176        | 3081        | 3963        | 3888        |
| Otolaryngology                | 4978        | 4745        | 4438        | 4215        | 2802        | 2126        | 561         | 4894        | 4481        | 6622        |
| Pathology                     | 24994       | 16923       | 35011       | 34286       | 31529       | 39683       | 32469       | 12550       | 11233       | 14118       |
| Pediatrics                    | 26289       | 22806       | 21451       | 16148       | 15878       | 13828       | 13097       | 9740        | 10204       | 14790       |
| Physical Medicine & Rehab     | 0           | 0           | 0           | 0           | 0           | 0           | 0           | 0           | 0           | 0           |
| Plastic Surgery               | 0           | 0           | 0           | 0           | 0           | 0           | 0           | 0           | 0           | 0           |
| Psychiatry                    | 17668       | 16851       | 18824       | 15306       | 17132       | 12490       | 10633       | 8513        | 7611        | 8414        |
| Radiation-Diagnostic/Oncology | 2851        | 3718        | 4139        | 5610        | 11059       | 6323        | 8091        | 7685        | 9878        | 11119       |
| Surgery                       | 25238       | 21098       | 23432       | 15111       | 23661       | 23529       | 34296       | 30499       | 26055       | 36847       |
| Urology                       | 4835        | 4641        | 3800        | 5018        | 4997        | 5874        | 0           | 0           | 0           | 0           |
| <b>U01</b>                    | <b>2011</b> | <b>2012</b> | <b>2013</b> | <b>2014</b> | <b>2015</b> | <b>2016</b> | <b>2017</b> | <b>2018</b> | <b>2019</b> | <b>2020</b> |
| Anesthesiology                | 3304        | 3100        | 3391        | 6599        | 5552        | 11212       | 8251        | 7459        | 9982        | 8843        |
| Dermatology                   | 810         | 2461        | 2370        | 2118        | 3818        | 2550        | 2900        | 3173        | 7142        | 4542        |
| Emergency Medicine            | 18243       | 16572       | 7912        | 6643        | 4125        | 3066        | 5882        | 22501       | 1724        | 12315       |
| Family Medicine               | 5269        | 8064        | 8594        | 9302        | 11065       | 8951        | 5709        | 7876        | 8711        | 6972        |
| Internal Medicine/Medicine    | 394866      | 37781       | 41240       | 393630      | 345938      | 329892      | 357428      | 374589      | 538414      | 601801      |

|                               |       |       |       |       |       |       |       |       |       |        |
|-------------------------------|-------|-------|-------|-------|-------|-------|-------|-------|-------|--------|
| Neurology                     | 61745 | 67582 | 68966 | 74945 | 60500 | 81498 | 64163 | 99592 | 89879 | 120052 |
| Neurosurgery                  | 4610  | 4511  | 15097 | 14227 | 10701 | 23901 | 24850 | 12366 | 5976  | 4821   |
| Obstetrics and Gynecology     | 25401 | 16745 | 5030  | 10416 | 44349 | 9044  | 8012  | 10944 | 7021  | 7298   |
| Ophthalmology                 | 2346  | 2406  | 1868  | 1283  | 2775  | 3457  | 3533  | 5485  | 5948  | 6846   |
| Orthopedics                   | 0     | 0     | 503   | 622   | 184   | 183   | 0     | 0     | 616   | 559    |
| Otolaryngology                | 1413  | 815   | 1101  | 992   | 2442  | 2225  | 2644  | 3587  | 1879  | 2681   |
| Pathology                     | 45262 | 29147 | 26251 | 18593 | 18371 | 23050 | 24664 | 28968 | 26126 | 27745  |
| Pediatrics                    | 98053 | 97561 | 87854 | 95628 | 87939 | 78882 | 77451 | 78320 | 72298 | 63706  |
| Physical Medicine & Rehab     | 569   | 611   | 3664  | 3296  | 3639  | 3361  | 3258  | 1728  | 4439  | 6730   |
| Plastic Surgery               | 0     | 0     | 0     | 0     | 0     | 0     | 0     | 383   | 376   | 371    |
| Psychiatry                    | 41548 | 57671 | 51564 | 57653 | 63027 | 55085 | 46821 | 52207 | 80985 | 68057  |
| Radiation-Diagnostic/Oncology | 6629  | 8442  | 13378 | 16233 | 18294 | 16084 | 32004 | 33367 | 34595 | 33086  |
| Surgery                       | 29433 | 38495 | 37429 | 32439 | 37570 | 33137 | 29027 | 34900 | 35093 | 28211  |
| Urology                       | 13453 | 11139 | 11389 | 7318  | 6127  | 6740  | 6964  | 6162  | 9275  | 4447   |

Supplementary Table 10: Dollar amount for each NIH training grant (F32, T32) spent per active physician from 2011-2020 by specialty

| F32                           | 2011    | 2012    | 2013    | 2014    | 2015    | 2016    | 2017    | 2018    | 2019    | 2020    |
|-------------------------------|---------|---------|---------|---------|---------|---------|---------|---------|---------|---------|
| Anesthesiology                | 4.78    | 7.64    | 9.74    | 7.42    | 0.57    | 1.4     | 4.1     | 6.85    | 2.88    | 9.23    |
| Dermatology                   | 16.02   | 20.11   | 13.69   | 7.43    | 12.72   | 14.03   | 19.18   | 18.95   | 5.28    | 15.79   |
| Emergency Medicine            | 1.74    | 1.52    | 1.67    | 0       | 0       | 0       | 0       | 0       | 0       | 1.44    |
| Family Medicine               | 0       | 0       | 0       | 0.51    | 0.18    | 0       | 0       | 0       | 0       | 0       |
| Internal Medicine/Medicine    | 60.00   | 52.73   | 52.68   | 49.24   | 51.13   | 55.89   | 53.96   | 54.6    | 55.5    | 64.07   |
| Neurology                     | 56.70   | 34.41   | 73.72   | 115.95  | 108.80  | 95.65   | 89.98   | 10.08   | 111.97  | 98.51   |
| Neurosurgery                  | 83.50   | 71.52   | 65.43   | 78.52   | 94.00   | 99.01   | 95.66   | 142.17  | 76.98   | 126.36  |
| Obstetrics and Gynecology     | 5.19    | 7.15    | 4.29    | 5.23    | 6.65    | 5.51    | 3.51    | 8.43    | 7.26    | 7.12    |
| Ophthalmology                 | 10.05   | 19.35   | 21.02   | 26.6    | 34.64   | 21.27   | 22.87   | 22.01   | 27.56   | 29.37   |
| Orthopedics                   | 12.45   | 14.72   | 13.01   | 12.01   | 16.79   | 15.13   | 17.44   | 22.53   | 23.41   | 24.71   |
| Otolaryngology                | 57.13   | 41.39   | 38.07   | 54.29   | 31.56   | 48.85   | 62.45   | 56.16   | 51.1    | 44.43   |
| Pathology                     | 76.21   | 60.31   | 69.66   | 75.78   | 90.87   | 104.76  | 69.50   | 82.55   | 77.49   | 57.4    |
| Pediatrics                    | 24.12   | 25.33   | 22.15   | 21.59   | 15.07   | 13.34   | 12.61   | 12.81   | 19.1    | 11.01   |
| Physical Medicine & Rehab     | 6.04    | 5.95    | 0       | 6.2     | 4.45    | 7.45    | 20.15   | 25.75   | 20.18   | 14.01   |
| Plastic Surgery               | 0       | 0       | 0       | 0       | 0       | 0       | 0       | 0       | 9.64    | 0       |
| Psychiatry                    | 50.17   | 36.82   | 35.34   | 33.44   | 37.73   | 41.09   | 30.83   | 35.99   | 43.81   | 52.11   |
| Radiation-Diagnostic/Oncology | 21.82   | 11.38   | 4.91    | 1.44    | 2.89    | 12.18   | 9.61    | 10.57   | 6.52    | 11.04   |
| Surgery                       | 31.58   | 29.51   | 26.28   | 38.96   | 45.51   | 40.85   | 37.60   | 50.79   | 39.44   | 42.67   |
| Urology                       | 11.85   | 10.83   | 11.39   | 22.73   | 12.31   | 15.78   | 11.92   | 7.36    | 6.43    | 7.88    |
| T32                           | 2011    | 2012    | 2013    | 2014    | 2015    | 2016    | 2017    | 2018    | 2019    | 2020    |
| Anesthesiology                | 57.45   | 65.31   | 66.96   | 79.36   | 116.40  | 119.52  | 128.66  | 119.92  | 120.27  | 106.38  |
| Dermatology                   | 207.61  | 220.53  | 199.12  | 159.48  | 201.52  | 198.46  | 188.16  | 177.45  | 156.36  | 162.62  |
| Emergency Medicine            | 0       | 0       | 0       | 0       | 0       | 4.12    | 17.46   | 20.42   | 20.27   | 16.17   |
| Family Medicine               | 11.59   | 10.88   | 14.03   | 13.50   | 13.54   | 11.82   | 19.34   | 15.01   | 12.46   | 14.80   |
| Internal Medicine/Medicine    | 1054.73 | 1053.63 | 100.59  | 990.15  | 1010.85 | 1043.62 | 1038.99 | 1125.69 | 1119.66 | 1158.87 |
| Neurology                     | 738.92  | 649.11  | 632.01  | 755.62  | 672.69  | 734.84  | 787.50  | 809.40  | 642.70  | 814.60  |
| Neurosurgery                  | 117.21  | 104.03  | 112.52  | 114.08  | 325.3   | 334.6   | 297.2   | 403.1   | 638.7   | 697.7   |
| Obstetrics and Gynecology     | 59.25   | 58.68   | 61.87   | 63.72   | 64.74   | 58.75   | 51.7    | 39.48   | 41.24   | 67.03   |
| Ophthalmology                 | 160.46  | 175.12  | 242.27  | 237.86  | 215.42  | 206.22  | 199.95  | 213.17  | 252.12  | 246.06  |
| Orthopedics                   | 88.32   | 106.23  | 94.12   | 83.97   | 88.05   | 87.9    | 96.42   | 82.36   | 87.83   | 108.73  |
| Otolaryngology                | 268.30  | 359.98  | 305.44  | 392.08  | 420.92  | 397.90  | 455.84  | 453.01  | 438.15  | 494.20  |
| Pathology                     | 2186.81 | 2035.57 | 1914.38 | 1993.36 | 1842.40 | 1841.23 | 1952.68 | 1936.68 | 1803.78 | 1596.10 |
| Pediatrics                    | 440.82  | 429.56  | 402.71  | 380.54  | 425.45  | 423.31  | 375.23  | 407.32  | 413.19  | 425.38  |
| Physical Medicine & Rehab     | 168.31  | 122.68  | 122.6   | 93.41   | 102.48  | 108.48  | 113.81  | 134.73  | 129.29  | 164.28  |
| Plastic Surgery               | 0       | 0       | 0       | 0       | 0       | 0       | 0       | 0       | 0       | 0       |
| Psychiatry                    | 523.79  | 546.74  | 544.91  | 509.45  | 480.55  | 534.91  | 553.12  | 559.63  | 585.23  | 672.18  |
| Radiation-Diagnostic/Oncology | 171.95  | 116.67  | 123.22  | 127.95  | 141.77  | 183.69  | 150.70  | 192.13  | 188.18  | 160.75  |
| Surgery                       | 479.19  | 476.61  | 446.78  | 428.43  | 415.80  | 490.17  | 527.02  | 632.8   | 698.7   | 643.1   |
| Urology                       | 110.36  | 124.87  | 117.82  | 119.16  | 66.07   | 91.89   | 62.83   | 33.26   | 96.93   | 113.31  |

Inflation-Adjusted Dollar amount for each NIH training grant (F32, T32) spent per active physician from 2011-2020 by specialty

| F32                           | 2011   | 2012   | 2013   | 2014   | 2015   | 2016   | 2017   | 2018   | 2019   | 2020   |
|-------------------------------|--------|--------|--------|--------|--------|--------|--------|--------|--------|--------|
| Anesthesiology                | 4.78   | 7.50   | 9.39   | 7.02   | 0.53   | 1.30   | 3.74   | 6.10   | 2.52   | 7.96   |
| Dermatology                   | 16.02  | 19.75  | 13.20  | 7.03   | 11.90  | 13.02  | 17.48  | 16.88  | 4.61   | 13.61  |
| Emergency Medicine            | 1.74   | 1.49   | 1.61   | 0.00   | 0.00   | 0.00   | 0.00   | 0.00   | 0.00   | 1.24   |
| Family Medicine               | 0.00   | 0.00   | 0.00   | 0.48   | 0.17   | 0.00   | 0.00   | 0.00   | 0.00   | 0.00   |
| Internal Medicine/Medicine    | 60.00  | 51.78  | 50.80  | 46.58  | 47.82  | 51.85  | 49.18  | 48.63  | 48.48  | 55.24  |
| Neurology                     | 56.70  | 33.79  | 71.09  | 109.69 | 101.77 | 88.73  | 82.01  | 8.98   | 97.82  | 84.93  |
| Neurosurgery                  | 83.50  | 70.23  | 63.10  | 74.28  | 87.92  | 91.85  | 87.19  | 126.63 | 67.25  | 108.94 |
| Obstetrics and Gynecology     | 5.19   | 7.02   | 4.14   | 4.95   | 6.22   | 5.11   | 3.20   | 7.51   | 6.34   | 6.14   |
| Ophthalmology                 | 10.05  | 19.00  | 20.27  | 25.36  | 32.40  | 19.73  | 20.84  | 19.60  | 24.08  | 25.32  |
| Orthopedics                   | 12.45  | 14.46  | 12.55  | 11.36  | 15.70  | 14.04  | 15.90  | 20.07  | 20.45  | 21.30  |
| Otolaryngology                | 57.13  | 40.65  | 36.71  | 51.36  | 29.52  | 45.32  | 56.92  | 50.02  | 44.64  | 38.30  |
| Pathology                     | 76.21  | 59.23  | 67.18  | 71.69  | 85.00  | 97.18  | 63.34  | 73.53  | 67.69  | 49.49  |
| Pediatrics                    | 24.12  | 24.87  | 21.36  | 20.43  | 14.10  | 12.38  | 11.49  | 11.41  | 16.69  | 9.49   |
| Physical Medicine & Rehab     | 6.04   | 5.84   | 0.00   | 5.87   | 4.16   | 6.91   | 18.37  | 22.93  | 17.63  | 12.08  |
| Plastic Surgery               | 0.00   | 0.00   | 0.00   | 0.00   | 0.00   | 0.00   | 0.00   | 0.00   | 8.42   | 0.00   |
| Psychiatry                    | 50.17  | 36.16  | 34.08  | 31.64  | 35.29  | 38.12  | 28.10  | 32.06  | 38.27  | 44.93  |
| Radiation-Diagnostic/Oncology | 21.82  | 11.18  | 4.73   | 1.36   | 2.70   | 11.30  | 8.76   | 9.41   | 5.70   | 9.52   |
| Surgery                       | 31.58  | 28.98  | 25.34  | 36.86  | 42.57  | 37.80  | 34.27  | 45.24  | 34.45  | 36.79  |
| Urology                       | 11.85  | 10.64  | 10.98  | 21.50  | 11.51  | 14.64  | 10.86  | 6.56   | 5.62   | 6.79   |
| T32                           | 2011   | 2012   | 2013   | 2014   | 2015   | 2016   | 2017   | 2018   | 2019   | 2020   |
| Anesthesiology                | 57.45  | 64.14  | 64.57  | 75.08  | 108.87 | 110.88 | 117.27 | 106.81 | 105.07 | 91.71  |
| Dermatology                   | 207.61 | 216.57 | 192.02 | 150.87 | 188.49 | 184.11 | 171.50 | 158.05 | 136.59 | 140.20 |
| Emergency Medicine            | 0.00   | 0.00   | 0.00   | 0.00   | 0.00   | 3.82   | 15.91  | 18.19  | 17.71  | 13.94  |

|                               |         |         |         |         |         |         |         |         |         |         |
|-------------------------------|---------|---------|---------|---------|---------|---------|---------|---------|---------|---------|
| Family Medicine               | 11.59   | 10.68   | 13.53   | 12.77   | 12.66   | 10.97   | 17.63   | 13.37   | 10.88   | 12.76   |
| Internal Medicine/Medicine    | 1054.73 | 1034.69 | 97.00   | 936.72  | 945.50  | 968.14  | 946.97  | 1002.63 | 978.12  | 999.11  |
| Neurology                     | 738.92  | 637.44  | 609.48  | 714.85  | 629.20  | 681.69  | 717.76  | 720.92  | 561.45  | 702.30  |
| Neurosurgery                  | 117.21  | 102.16  | 108.51  | 107.92  | 304.27  | 310.40  | 270.88  | 359.03  | 557.96  | 601.52  |
| Obstetrics and Gynecology     | 59.25   | 57.63   | 59.66   | 60.28   | 60.55   | 54.50   | 47.12   | 35.16   | 36.03   | 57.79   |
| Ophthalmology                 | 160.46  | 171.97  | 233.63  | 225.03  | 201.49  | 191.30  | 182.24  | 189.87  | 220.25  | 212.14  |
| Orthopedics                   | 88.32   | 104.32  | 90.76   | 79.44   | 82.36   | 81.54   | 87.88   | 73.36   | 76.73   | 93.74   |
| Otolaryngology                | 268.30  | 353.51  | 294.55  | 370.92  | 393.71  | 369.12  | 415.47  | 403.49  | 382.76  | 426.07  |
| Pathology                     | 2186.81 | 1998.99 | 1846.12 | 1885.80 | 1723.29 | 1708.06 | 1779.74 | 1724.96 | 1575.75 | 1376.06 |
| Pediatrics                    | 440.82  | 421.84  | 388.35  | 360.01  | 397.94  | 392.69  | 342.00  | 362.79  | 360.96  | 366.74  |
| Physical Medicine & Rehab     | 168.31  | 120.48  | 118.23  | 88.37   | 95.85   | 100.63  | 103.73  | 120.00  | 112.95  | 141.63  |
| Plastic Surgery               | 0.00    | 0.00    | 0.00    | 0.00    | 0.00    | 0.00    | 0.00    | 0.00    | 0.00    | 0.00    |
| Psychiatry                    | 523.79  | 536.91  | 525.48  | 481.96  | 449.48  | 496.22  | 504.13  | 498.45  | 511.25  | 579.51  |
| Radiation-Diagnostic/Oncology | 171.95  | 114.57  | 118.83  | 121.05  | 132.60  | 170.40  | 137.35  | 171.13  | 164.39  | 138.59  |
| Surgery                       | 479.19  | 468.04  | 430.85  | 405.36  | 388.92  | 454.72  | 480.35  | 563.62  | 610.37  | 554.44  |
| Urology                       | 110.36  | 122.63  | 113.62  | 112.73  | 61.80   | 85.24   | 57.27   | 29.62   | 84.68   | 97.69   |

Supplementary Table 11: Dollar amount for each NIH career development grant (K01, K08, K23) spent per active physician from 2011-2020 by specialty

|                               | 2011   | 2012   | 2013   | 2014   | 2015   | 2016   | 2017   | 2018   | 2019   | 2020   |
|-------------------------------|--------|--------|--------|--------|--------|--------|--------|--------|--------|--------|
| <b>K01</b>                    |        |        |        |        |        |        |        |        |        |        |
| Anesthesiology                | 11.97  | 11.98  | 11.36  | 14.94  | 21.38  | 21.37  | 24.69  | 28.77  | 15.50  | 23.43  |
| Dermatology                   | 34.67  | 42.10  | 52.45  | 38.57  | 55.29  | 65.58  | 106.25 | 109.18 | 82.28  | 75.10  |
| Emergency Medicine            | 0      | 3.83   | 3.60   | 3.44   | 6.97   | 0      | 0      | 0.93   | 2.73   | 5.47   |
| Family Medicine               | 11.65  | 14.49  | 10.85  | 8.14   | 8.35   | 9.53   | 9.57   | 11.03  | 9.88   | 17.62  |
| Internal Medicine/Medicine    | 152.01 | 139.88 | 140.59 | 166.31 | 180.19 | 165.29 | 168.51 | 186.80 | 202.76 | 206.13 |
| Neurology                     | 125.34 | 139.07 | 175.80 | 192.43 | 186.72 | 207.22 | 199.33 | 189.16 | 210.88 | 165.72 |
| Neurosurgery                  | 59.06  | 47.18  | 24.49  | 0      | 19.26  | 0      | 0      | 56.31  | 78.98  | 57.08  |
| Obstetrics and Gynecology     | 6.92   | 4.21   | 7.66   | 15.55  | 18.77  | 17.85  | 22.88  | 18.27  | 23.96  | 26.07  |
| Ophthalmology                 | 0      | 0      | 0      | 7.10   | 0      | 0      | 7.72   | 13.28  | 13.46  | 7.52   |
| Orthopedics                   | 31.17  | 24.07  | 41.73  | 44.16  | 57.72  | 46.4   | 39.47  | 32.31  | 36.72  | 30.81  |
| Otolaryngology                | 29.72  | 29.58  | 29.44  | 27.75  | 0      | 0      | 0      | 0      | 0      | 13.27  |
| Pathology                     | 102.72 | 114.00 | 123.82 | 111.14 | 113.43 | 153.99 | 164.00 | 185.13 | 163.88 | 218.65 |
| Pediatrics                    | 44.76  | 38.30  | 40.61  | 43.32  | 37.79  | 53.22  | 54.02  | 51.33  | 56.95  | 59.26  |
| Physical Medicine & Rehab     | 40.44  | 41.98  | 54.95  | 81.08  | 94.27  | 107.23 | 180.41 | 174.18 | 136.74 | 154.63 |
| Plastic Surgery               | 0      | 0      | 0      | 0      | 0      | 0      | 0      | 0      | 0      | 0      |
| Psychiatry                    | 314.48 | 321.51 | 296.05 | 304.76 | 284.39 | 268.10 | 274.19 | 264.67 | 286.16 | 314.98 |
| Radiation-Diagnostic/Oncology | 64.43  | 55.86  | 40.20  | 41.23  | 44.27  | 49.16  | 67.88  | 60.06  | 46.75  | 36.61  |
| Surgery                       | 37.96  | 33.43  | 49.24  | 35.12  | 53.59  | 68.22  | 83.1   | 62.83  | 53.73  | 39.57  |
| Urology                       | 10.77  | 10.80  | 10.83  | 14.04  | 44.88  | 60.18  | 85.28  | 69.62  | 68.52  | 85.16  |
| <b>K08</b>                    |        |        |        |        |        |        |        |        |        |        |
| Anesthesiology                | 40.78  | 45.27  | 50.82  | 55.42  | 51.27  | 49.53  | 63.75  | 90.26  | 106.84 | 94.17  |
| Dermatology                   | 205.68 | 208.13 | 170.54 | 150.23 | 153.90 | 162.85 | 162.50 | 146.67 | 161.06 | 130.13 |
| Emergency Medicine            | 8.33   | 15.95  | 23.50  | 15.43  | 18.84  | 26.64  | 26.82  | 29.34  | 24.63  | 24.8   |
| Family Medicine               | 5.73   | 5.72   | 6.22   | 2.50   | 1.33   | 1.30   | 1.48   | 1.45   | 4.35   | 4.26   |
| Internal Medicine/Medicine    | 344.14 | 330.28 | 299.67 | 304.18 | 280.67 | 323.79 | 324.02 | 352.97 | 387.86 | 392.13 |
| Neurology                     | 490.32 | 443.51 | 500.72 | 436.15 | 433.34 | 399.55 | 414.33 | 408.50 | 461.26 | 522.45 |
| Neurosurgery                  | 229.79 | 234.21 | 279.63 | 219.26 | 310.07 | 343.34 | 401.77 | 356.15 | 412.35 | 314.03 |
| Obstetrics and Gynecology     | 26.56  | 26.52  | 23.33  | 14.54  | 5.88   | 8.99   | 8.01   | 21.51  | 25.98  | 39.2   |
| Ophthalmology                 | 273.33 | 279.28 | 291.34 | 334.57 | 328.66 | 290.54 | 292.39 | 276.97 | 261.70 | 252.56 |
| Orthopedics                   | 9.04   | 13.71  | 26.79  | 22.73  | 25.33  | 45.65  | 63.2   | 54.19  | 44.41  | 51.9   |
| Otolaryngology                | 216.07 | 235.99 | 227.68 | 195.77 | 240.71 | 218.56 | 176.78 | 200.32 | 221.60 | 192.27 |
| Pathology                     | 324.60 | 298.86 | 333.48 | 359.99 | 343.54 | 300.77 | 296.19 | 367.42 | 373.30 | 413.28 |
| Pediatrics                    | 270.48 | 236.56 | 230.35 | 217.43 | 202.81 | 231.42 | 293.33 | 328.39 | 319.98 | 309.69 |
| Physical Medicine & Rehab     | 14.69  | 14.35  | 14.03  | 0      | 0      | 0      | 0      | 17.91  | 17.51  | 17.58  |
| Plastic Surgery               | 0      | 0      | 0      | 0      | 0      | 0      | 0      | 0      | 0      | 0      |
| Psychiatry                    | 148.44 | 132.90 | 88.13  | 119.99 | 98.17  | 102.58 | 111.62 | 96.05  | 83.94  | 109.84 |
| Radiation-Diagnostic/Oncology | 25.01  | 23.36  | 21.72  | 23.96  | 21.53  | 4.38   | 13.36  | 15.04  | 69.92  | 90.98  |
| Surgery                       | 300.38 | 312.41 | 264.84 | 260.59 | 214.63 | 243.63 | 253.30 | 289.80 | 299.40 | 325.49 |
| Urology                       | 123.84 | 122.20 | 142.34 | 108.32 | 67.48  | 83.58  | 85.01  | 82.5   | 108.92 | 107.64 |
| <b>K23</b>                    |        |        |        |        |        |        |        |        |        |        |
| Anesthesiology                | 29.91  | 38.53  | 45.12  | 49.58  | 44.81  | 37.01  | 53.81  | 51.26  | 72.70  | 70.44  |
| Dermatology                   | 33.98  | 44.24  | 22.18  | 10.66  | 21.97  | 56.29  | 57.57  | 111.06 | 124.41 | 107.01 |
| Emergency Medicine            | 68.98  | 59.28  | 62.06  | 56.18  | 55.92  | 75.99  | 88.16  | 76.13  | 79.18  | 57.31  |
| Family Medicine               | 13.02  | 11.66  | 8.27   | 3.99   | 5.82   | 5.20   | 7.11   | 6.91   | 8.33   | 9.31   |
| Internal Medicine/Medicine    | 407.03 | 419.60 | 411.26 | 391.56 | 355.75 | 377.87 | 374.26 | 374.05 | 374.07 | 418.03 |
| Neurology                     | 696.50 | 687.37 | 591.24 | 631.47 | 644.54 | 518.67 | 638.91 | 670.83 | 728.21 | 744.63 |
| Neurosurgery                  | 73.70  | 139.35 | 178.37 | 132.14 | 157.06 | 133.72 | 132.76 | 130.34 | 161.29 | 195.31 |
| Obstetrics and Gynecology     | 39.68  | 44.49  | 33.98  | 41.18  | 27.96  | 15.59  | 27.45  | 32.06  | 40.59  | 47.61  |
| Ophthalmology                 | 159.02 | 129.45 | 144.34 | 121.28 | 144.82 | 217.56 | 242.46 | 212.90 | 233.70 | 219.24 |
| Orthopedics                   | 17.02  | 19.94  | 16.53  | 16.51  | 10.16  | 18.17  | 9.12   | 19.40  | 25.89  | 28.72  |
| Otolaryngology                | 160.86 | 134.92 | 132.49 | 203.04 | 276.16 | 226.42 | 255.43 | 251.86 | 234.92 | 186.50 |
| Pathology                     | 34.49  | 27.91  | 19.31  | 30.02  | 20.86  | 10.49  | 11.37  | 11.18  | 15.03  | 41.74  |
| Pediatrics                    | 233.29 | 228.02 | 218.64 | 212.86 | 190.71 | 176.80 | 254.69 | 275.13 | 310.56 | 367.60 |
| Physical Medicine & Rehab     | 116.92 | 108.31 | 169.68 | 181.33 | 142.39 | 133.04 | 106.19 | 28.27  | 46.51  | 45.29  |
| Plastic Surgery               | 0      | 0      | 0      | 0      | 0      | 0      | 0      | 0      | 0      | 0      |
| Psychiatry                    | 498.00 | 481.66 | 451.55 | 429.56 | 414.64 | 403.43 | 473.34 | 465.21 | 498.79 | 506.35 |
| Radiation-Diagnostic/Oncology | 29.33  | 18.78  | 16.73  | 17.03  | 16.74  | 17.70  | 18.13  | 8.86   | 4.74   | 13.99  |
| Surgery                       | 64.76  | 64.88  | 58.74  | 62.32  | 58.19  | 77.12  | 64.29  | 57.90  | 60.88  | 87.85  |
| Urology                       | 31.99  | 15.71  | 30.39  | 47.54  | 30.71  | 44.21  | 31.45  | 14.34  | 49.54  | 49.35  |

Inflation-Adjusted Dollar amount for each NIH career development grant (K01, K08, K23) spent per active physician from 2011-2020 by specialty

|                               | 2011   | 2012   | 2013   | 2014   | 2015   | 2016   | 2017   | 2018   | 2019   | 2020   |
|-------------------------------|--------|--------|--------|--------|--------|--------|--------|--------|--------|--------|
| <b>K01</b>                    |        |        |        |        |        |        |        |        |        |        |
| Anesthesiology                | 11.97  | 11.76  | 10.95  | 14.13  | 20.00  | 19.82  | 22.50  | 25.62  | 13.54  | 20.20  |
| Dermatology                   | 34.67  | 41.34  | 50.58  | 36.49  | 51.72  | 60.84  | 96.84  | 97.24  | 71.88  | 64.75  |
| Emergency Medicine            | 0      | 3.76   | 3.47   | 3.25   | 6.52   | 0.00   | 0.00   | 0.83   | 2.38   | 4.72   |
| Family Medicine               | 11.65  | 14.23  | 10.46  | 7.70   | 7.81   | 8.84   | 8.72   | 9.82   | 8.63   | 15.19  |
| Internal Medicine/Medicine    | 152.01 | 137.37 | 135.58 | 157.34 | 168.54 | 153.34 | 153.59 | 166.38 | 177.13 | 177.71 |
| Neurology                     | 125.34 | 136.57 | 169.53 | 182.05 | 174.65 | 192.23 | 181.68 | 168.48 | 184.22 | 142.87 |
| Neurosurgery                  | 59.06  | 46.33  | 23.62  | 0.00   | 0.00   | 17.87  | 0.00   | 50.15  | 69.00  | 49.21  |
| Obstetrics and Gynecology     | 6.92   | 4.13   | 7.39   | 14.71  | 17.56  | 16.56  | 20.85  | 16.27  | 20.93  | 22.48  |
| Ophthalmology                 | 0      | 0.00   | 0.00   | 6.72   | 0.00   | 0.00   | 7.04   | 11.83  | 11.76  | 6.48   |
| Orthopedics                   | 31.17  | 23.64  | 40.24  | 41.78  | 53.99  | 43.04  | 35.97  | 28.78  | 32.08  | 26.56  |
| Otolaryngology                | 29.72  | 29.05  | 28.39  | 26.25  | 0.00   | 0.00   | 0.00   | 0.00   | 0.00   | 11.44  |
| Pathology                     | 102.72 | 111.95 | 119.41 | 105.14 | 106.10 | 142.85 | 149.48 | 164.89 | 143.16 | 188.51 |
| Pediatrics                    | 44.76  | 37.61  | 39.16  | 40.98  | 35.35  | 49.37  | 49.24  | 45.72  | 49.75  | 51.09  |
| Physical Medicine & Rehab     | 40.44  | 41.23  | 52.99  | 76.71  | 88.18  | 99.47  | 164.43 | 155.14 | 119.45 | 133.31 |
| Plastic Surgery               | 0      | 0.00   | 0.00   | 0.00   | 0.00   | 0.00   | 0.00   | 0.00   | 0.00   | 0.00   |
| Psychiatry                    | 314.48 | 315.73 | 285.49 | 288.32 | 266.00 | 248.71 | 249.91 | 235.74 | 249.99 | 271.56 |
| Radiation-Diagnostic/Oncology | 64.43  | 54.86  | 38.77  | 39.01  | 41.41  | 45.60  | 61.87  | 53.49  | 40.84  | 31.56  |
| Surgery                       | 37.96  | 32.83  | 47.48  | 33.22  | 50.13  | 63.29  | 75.74  | 55.96  | 46.94  | 34.11  |
| Urology                       | 10.77  | 10.61  | 10.44  | 13.28  | 41.98  | 55.83  | 77.73  | 62.01  | 59.86  | 73.42  |
| <b>K08</b>                    |        |        |        |        |        |        |        |        |        |        |
| Anesthesiology                | 40.78  | 44.46  | 49.01  | 52.43  | 47.96  | 45.95  | 58.10  | 80.39  | 93.33  | 81.19  |
| Dermatology                   | 205.68 | 204.39 | 164.46 | 142.12 | 143.95 | 151.07 | 148.11 | 130.64 | 140.70 | 112.19 |
| Emergency Medicine            | 8.33   | 15.66  | 22.66  | 14.60  | 17.62  | 24.71  | 24.44  | 26.13  | 21.52  | 21.38  |
| Family Medicine               | 5.73   | 5.62   | 6.00   | 2.37   | 1.24   | 1.21   | 1.35   | 1.29   | 3.80   | 3.67   |
| Internal Medicine/Medicine    | 344.14 | 324.34 | 288.99 | 287.77 | 262.52 | 300.37 | 295.32 | 314.38 | 338.83 | 338.07 |
| Neurology                     | 490.32 | 435.54 | 482.87 | 412.62 | 405.32 | 370.65 | 377.64 | 363.84 | 402.95 | 450.43 |
| Neurosurgery                  | 229.79 | 230.00 | 269.66 | 207.43 | 290.02 | 318.51 | 366.19 | 317.22 | 360.22 | 270.74 |
| Obstetrics and Gynecology     | 26.56  | 26.04  | 22.50  | 13.76  | 5.50   | 8.34   | 7.30   | 19.16  | 22.70  | 33.80  |
| Ophthalmology                 | 273.33 | 274.26 | 280.95 | 316.52 | 307.41 | 269.53 | 266.50 | 246.69 | 228.62 | 217.74 |
| Orthopedics                   | 9.04   | 13.46  | 25.83  | 21.50  | 23.69  | 42.35  | 57.60  | 48.27  | 38.80  | 44.75  |
| Otolaryngology                | 216.07 | 231.75 | 219.56 | 185.21 | 225.15 | 202.75 | 161.12 | 178.42 | 193.59 | 165.76 |
| Pathology                     | 324.6  | 293.49 | 321.59 | 340.57 | 321.33 | 279.02 | 269.96 | 327.25 | 326.11 | 356.31 |
| Pediatrics                    | 270.48 | 232.31 | 222.14 | 205.70 | 189.70 | 214.68 | 267.35 | 292.49 | 279.53 | 267.00 |
| Physical Medicine & Rehab     | 14.69  | 14.09  | 13.53  | 0.00   | 0.00   | 0.00   | 0.00   | 15.95  | 15.30  | 15.16  |
| Plastic Surgery               | 0      | 0.00   | 0.00   | 0.00   | 0.00   | 0.00   | 0.00   | 0.00   | 0.00   | 0.00   |
| Psychiatry                    | 148.44 | 130.51 | 84.99  | 113.52 | 91.82  | 95.16  | 101.73 | 85.55  | 73.33  | 94.70  |
| Radiation-Diagnostic/Oncology | 25.01  | 22.94  | 20.95  | 22.67  | 20.14  | 4.06   | 12.18  | 13.40  | 61.08  | 78.44  |
| Surgery                       | 300.38 | 306.80 | 255.40 | 246.53 | 200.75 | 226.01 | 230.87 | 258.12 | 261.55 | 280.62 |
| Urology                       | 123.84 | 120.00 | 137.26 | 102.48 | 63.12  | 77.54  | 77.48  | 73.48  | 95.15  | 92.80  |
| <b>K23</b>                    |        |        |        |        |        |        |        |        |        |        |
| Anesthesiology                | 29.91  | 37.84  | 43.51  | 46.90  | 41.91  | 34.33  | 49.04  | 45.66  | 63.51  | 60.73  |
| Dermatology                   | 33.98  | 43.44  | 21.39  | 10.08  | 20.55  | 52.22  | 52.47  | 98.92  | 108.68 | 92.26  |
| Emergency Medicine            | 68.98  | 58.21  | 59.85  | 53.15  | 52.30  | 70.49  | 80.35  | 67.81  | 69.17  | 49.41  |
| Family Medicine               | 13.02  | 11.45  | 7.98   | 3.77   | 5.44   | 4.82   | 6.48   | 6.15   | 7.28   | 8.03   |
| Internal Medicine/Medicine    | 407.03 | 412.06 | 396.60 | 370.43 | 332.75 | 350.54 | 341.11 | 333.16 | 326.78 | 360.40 |
| Neurology                     | 696.5  | 675.02 | 570.16 | 597.40 | 602.87 | 481.16 | 582.33 | 597.49 | 636.15 | 641.98 |
| Neurosurgery                  | 73.7   | 136.85 | 172.01 | 125.01 | 146.91 | 124.05 | 121.00 | 116.09 | 140.90 | 168.38 |
| Obstetrics and Gynecology     | 39.68  | 43.69  | 32.77  | 38.96  | 26.15  | 14.46  | 25.02  | 28.56  | 35.46  | 41.05  |
| Ophthalmology                 | 159.02 | 127.12 | 139.19 | 114.74 | 135.46 | 201.82 | 220.99 | 189.63 | 204.16 | 189.02 |
| Orthopedics                   | 17.02  | 19.58  | 15.94  | 15.62  | 9.50   | 16.86  | 8.31   | 17.28  | 22.62  | 24.76  |
| Otolaryngology                | 160.86 | 132.50 | 127.77 | 192.08 | 258.31 | 210.04 | 232.81 | 224.33 | 205.22 | 160.79 |
| Pathology                     | 34.49  | 27.41  | 18.62  | 28.40  | 19.51  | 9.73   | 10.36  | 9.96   | 13.13  | 35.99  |
| Pediatrics                    | 233.29 | 223.92 | 210.84 | 201.37 | 178.38 | 164.01 | 232.13 | 245.05 | 271.30 | 316.92 |
| Physical Medicine & Rehab     | 116.92 | 106.36 | 163.63 | 171.55 | 133.18 | 123.42 | 96.79  | 25.18  | 40.63  | 39.05  |
| Plastic Surgery               | 0      | 0.00   | 0.00   | 0.00   | 0.00   | 0.00   | 0.00   | 0.00   | 0.00   | 0.00   |
| Psychiatry                    | 498    | 473.00 | 435.45 | 406.38 | 387.83 | 374.25 | 431.42 | 414.35 | 435.74 | 436.55 |
| Radiation-Diagnostic/Oncology | 29.33  | 18.44  | 16.13  | 16.11  | 15.66  | 16.42  | 16.52  | 7.89   | 4.14   | 12.06  |
| Surgery                       | 64.76  | 63.71  | 56.65  | 58.96  | 54.43  | 71.54  | 58.60  | 51.57  | 53.18  | 75.74  |
| Urology                       | 31.99  | 15.43  | 29.31  | 44.97  | 28.72  | 41.01  | 28.66  | 12.77  | 43.28  | 42.55  |

Supplementary Table 12: Dollar amount for each NIH advanced career grant (R01, R03, R21, P30, U01) spent per active physician from 2011-2020 by specialty

|                               | 2011     | 2012     | 2013     | 2014     | 2015     | 2016     | 2017     | 2018     | 2019     | 2020     |
|-------------------------------|----------|----------|----------|----------|----------|----------|----------|----------|----------|----------|
| <b>R01</b>                    |          |          |          |          |          |          |          |          |          |          |
| Anesthesiology                | 1857.17  | 2085.47  | 2002.89  | 2147.10  | 2039.57  | 2065.00  | 2117.78  | 2506.67  | 2616.49  | 2857.83  |
| Dermatology                   | 3680.31  | 3956.23  | 3656.59  | 3414.25  | 3400.26  | 3538.3   | 3308.52  | 3959.33  | 4035.89  | 3969.33  |
| Emergency Medicine            | 356.59   | 362.32   | 370.61   | 404.05   | 420.12   | 452.30   | 504.30   | 552.70   | 687.19   | 898.84   |
| Family Medicine               | 352.34   | 385.20   | 339.17   | 306.29   | 350.25   | 344.39   | 342.24   | 389.01   | 389.17   | 444.97   |
| Internal Medicine/Medicine    | 11841.01 | 11375.60 | 10358.28 | 10522.61 | 10445.97 | 11232.57 | 12068.33 | 12884.91 | 13695.55 | 14925.08 |
| Neurology                     | 16516.17 | 17029.48 | 16227.40 | 16367.29 | 16396.56 | 18126.12 | 20592.56 | 24183.35 | 24585.73 | 29452.72 |
| Neurosurgery                  | 9547.89  | 9969.06  | 9068.75  | 9058.58  | 11454.43 | 11991.81 | 12558.93 | 13670.75 | 14873.42 | 17044.80 |
| Obstetrics and Gynecology     | 1242.54  | 1158.34  | 1173.61  | 1166.74  | 1256.97  | 1534.18  | 1811.10  | 1874.12  | 2278.34  | 2698.02  |
| Ophthalmology                 | 8000.73  | 8093.83  | 7832.38  | 8461.44  | 7953.54  | 7903.77  | 8352.17  | 8895.57  | 9648.68  | 10296.89 |
| Orthopedics                   | 1898.66  | 2080.26  | 2274.09  | 2308.81  | 2198.59  | 2471.33  | 2734.49  | 2915.80  | 3189.91  | 3678.49  |
| Otolaryngology                | 5631.72  | 6016.96  | 6041.57  | 6207.68  | 6739.23  | 6722.77  | 7091.05  | 8145.93  | 9384.18  | 9321.23  |
| Pathology                     | 21647.85 | 22199.46 | 21486.80 | 20697.31 | 21660.82 | 22643.09 | 23192.63 | 26175.89 | 28488.09 | 30626.48 |
| Pediatrics                    | 5629.26  | 6015.39  | 5538.10  | 5682.43  | 5457.86  | 5382.00  | 5122.00  | 5473.96  | 5685.77  | 6498.71  |
| Physical Medicine & Rehab     | 1322.77  | 1502.20  | 1482.51  | 1669.98  | 1491.60  | 1895.05  | 2514.18  | 2830.94  | 2912.92  | 3148.88  |
| Plastic Surgery               | 141.77   | 0        | 77.41    | 43.23    | 0        | 0        | 46.66    | 0        | 38.79    | 0        |
| Psychiatry                    | 12281.68 | 12154.31 | 10887.32 | 11196.29 | 10620.6  | 11368.05 | 11898.19 | 12833.89 | 13164.48 | 14072.72 |
| Radiation-Diagnostic/Oncology | 6337.90  | 5937.65  | 5370.79  | 5271.53  | 5476.99  | 5891.45  | 6445.64  | 7240.69  | 7391.27  | 7553.73  |
| Surgery                       | 5574.43  | 5444.49  | 5059.00  | 5335.00  | 5655.51  | 5773.19  | 6506.34  | 6985.99  | 7916.08  | 8974.18  |
| Urology                       | 2443.77  | 2561.83  | 2560.75  | 2374.32  | 2212.76  | 2088.62  | 2342.54  | 2400.10  | 2465.14  | 2774.51  |

| <b>R03</b>                    | <b>2011</b> | <b>2012</b> | <b>2013</b> | <b>2014</b> | <b>2015</b> | <b>2016</b> | <b>2017</b> | <b>2018</b> | <b>2019</b> | <b>2020</b> |
|-------------------------------|-------------|-------------|-------------|-------------|-------------|-------------|-------------|-------------|-------------|-------------|
| Anesthesiology                | 11.22       | 17.83       | 10.87       | 12.98       | 7.8         | 7.42        | 9.26        | 18.18       | 18.74       | 14.85       |
| Dermatology                   | 30.12       | 37.51       | 13.3        | 27.58       | 53.81       | 59.32       | 44.46       | 25.26       | 31.16       | 41.18       |
| Emergency Medicine            | 1.88        | 2.42        | 1.84        | 2.97        | 10.49       | 10.14       | 10.66       | 8.02        | 4.31        | 7.64        |
| Family Medicine               | 6.92        | 6.68        | 7.76        | 4.61        | 3.86        | 3.63        | 1.37        | 1.55        | 4.67        | 3.49        |
| Internal Medicine/Medicine    | 87.07       | 105.03      | 96.35       | 95.53       | 84.97       | 68.87       | 67.87       | 72.65       | 94.98       | 108.40      |
| Neurology                     | 74.68       | 50.39       | 65.06       | 79.21       | 93.9        | 124.56      | 100.69      | 85.09       | 108.58      | 103.35      |
| Neurosurgery                  | 77.53       | 152.81      | 148.5       | 73.58       | 111.07      | 65.76       | 29.25       | 28.56       | 27.88       | 98.37       |
| Obstetrics and Gynecology     | 14.88       | 21.29       | 18.72       | 19.53       | 18          | 24.15       | 31.96       | 32.95       | 26.32       | 17.9        |
| Ophthalmology                 | 0           | 0           | 0           | 10.6        | 14.59       | 4.33        | 6.26        | 10.18       | 16.7        | 17.09       |
| Orthopedics                   | 41.2        | 40.18       | 45.26       | 61.78       | 42.73       | 26.23       | 12.2        | 18.89       | 38.76       | 33.19       |
| Otolaryngology                | 186.14      | 244.97      | 255.34      | 210.19      | 200.4       | 177.92      | 188.66      | 135.84      | 32.77       | 48.56       |
| Pathology                     | 128.58      | 110.6       | 104.87      | 107.55      | 93.42       | 56.38       | 80.5        | 141.23      | 192.16      | 215.25      |
| Pediatrics                    | 52.63       | 43.19       | 47.98       | 45.78       | 52.52       | 69.15       | 53.11       | 64.05       | 53.04       | 61.13       |
| Physical Medicine & Rehab     | 79.07       | 62.53       | 51.81       | 66.44       | 45.03       | 42.72       | 18.44       | 51.4        | 85.91       | 74.33       |
| Plastic Surgery               | 0           | 0           | 0           | 0           | 0           | 10.87       | 10.87       | 0           | 0           | 0           |
| Psychiatry                    | 69.28       | 71.75       | 70.99       | 63.54       | 56.18       | 59.22       | 69.09       | 54.96       | 48.6        | 46.38       |
| Radiation-Diagnostic/Oncology | 24.15       | 14.76       | 19.67       | 36.08       | 39.98       | 18.51       | 23.3        | 38.92       | 53.93       | 51.51       |
| Surgery                       | 51.84       | 67.53       | 54.7        | 62.02       | 59.58       | 47.39       | 84.47       | 71.23       | 40.06       | 63.83       |
| Urology                       | 7.94        | 24.56       | 15.71       | 36.33       | 48.04       | 30.4        | 8.16        | 8.42        | 27.96       | 37.5        |
| <b>R21</b>                    | <b>2011</b> | <b>2012</b> | <b>2013</b> | <b>2014</b> | <b>2015</b> | <b>2016</b> | <b>2017</b> | <b>2018</b> | <b>2019</b> | <b>2020</b> |
| Anesthesiology                | 133.66      | 122.64      | 137.74      | 122.96      | 145.51      | 144.65      | 127.03      | 181.07      | 213.97      | 171.79      |
| Dermatology                   | 321.61      | 349.67      | 326.15      | 423.16      | 315.57      | 243         | 257.3       | 261.64      | 253.41      | 343.96      |
| Emergency Medicine            | 41.72       | 34.77       | 18.18       | 29.54       | 26.80       | 20.98       | 24.94       | 39.04       | 35.41       | 27.11       |
| Family Medicine               | 25.67       | 30.99       | 32.31       | 35.53       | 41.98       | 35.97       | 21.46       | 21.25       | 23.26       | 27.66       |
| Internal Medicine/Medicine    | 710.85      | 746.96      | 688.77      | 658.07      | 651.08      | 693.86      | 662.56      | 649.85      | 644.45      | 706.58      |
| Neurology                     | 999.05      | 1205.96     | 1116.44     | 1120.83     | 1135.85     | 1248.89     | 1273.00     | 1398.18     | 1824.26     | 1424.04     |
| Neurosurgery                  | 478.39      | 728.36      | 857.71      | 918.7       | 1363.36     | 1450.45     | 1033.97     | 987.89      | 2043.24     | 1760.36     |
| Obstetrics and Gynecology     | 168.40      | 129.99      | 140.44      | 118.83      | 126.50      | 113.79      | 106.80      | 136.27      | 146.98      | 231.77      |
| Ophthalmology                 | 216.49      | 212.90      | 320.06      | 305.76      | 431.98      | 356.16      | 262.60      | 341.72      | 594.16      | 580.71      |
| Orthopedics                   | 139.37      | 184.67      | 175.17      | 139.49      | 150.32      | 152.86      | 271.04      | 371.61      | 253.68      | 268.12      |
| Otolaryngology                | 289.56      | 349.50      | 494.81      | 540.28      | 476.43      | 309.99      | 312.12      | 542.15      | 572.56      | 698.81      |
| Pathology                     | 1620.52     | 1486.19     | 1638.03     | 2136.97     | 2484.83     | 2540.07     | 2202.75     | 1911.83     | 1902.49     | 2035.47     |
| Pediatrics                    | 359.27      | 347.60      | 352.27      | 388.35      | 430.29      | 430.77      | 404.95      | 414.89      | 451.71      | 500.34      |
| Physical Medicine & Rehab     | 91.84       | 164.28      | 245.29      | 184.19      | 76.42       | 213.84      | 296.67      | 220.45      | 290.64      | 251.52      |
| Plastic Surgery               | 0           | 0           | 0           | 0           | 0           | 0           | 0           | 0           | 0           | 0           |
| Psychiatry                    | 658.75      | 922.43      | 1025.81     | 969.51      | 843.17      | 820.23      | 829.34      | 805.39      | 864.34      | 1011.76     |
| Radiation-Diagnostic/Oncology | 629.93      | 620.50      | 536.98      | 620.40      | 659.97      | 612.15      | 570.57      | 445.28      | 529.63      | 601.95      |
| Surgery                       | 423.69      | 414.06      | 355.02      | 405.89      | 507.77      | 531.70      | 397.22      | 380.08      | 403.68      | 487.83      |
| Urology                       | 165.44      | 176.52      | 85.77       | 75.55       | 183.77      | 249.72      | 177.50      | 137.68      | 148.87      | 220.27      |
| <b>P30</b>                    | <b>2011</b> | <b>2012</b> | <b>2013</b> | <b>2014</b> | <b>2015</b> | <b>2016</b> | <b>2017</b> | <b>2018</b> | <b>2019</b> | <b>2020</b> |
| Anesthesiology                | 0           | 0           | 0           | 24.35       | 0           | 0           | 0           | 0           | 0           | 0           |
| Dermatology                   | 517.27      | 390.85      | 532.97      | 597.24      | 553.45      | 625.58      | 543.26      | 268.00      | 247.82      | 248.38      |
| Emergency Medicine            | 0           | 0           | 0           | 0           | 0           | 0           | 0           | 0           | 0           | 0           |
| Family Medicine               | 0           | 4.46        | 4.35        | 4.32        | 4.27        | 4.23        | 13.21       | 14.08       | 17.13       | 19.61       |
| Internal Medicine/Medicine    | 2716.56     | 2911.97     | 3057.10     | 3514.81     | 3147.97     | 3230.52     | 3307.98     | 3315.39     | 3776.81     | 4086.91     |
| Neurology                     | 1056.37     | 1155.52     | 1063.93     | 976.67      | 998.45      | 1076.64     | 1065.6      | 1194.65     | 1491.94     | 3464.85     |
| Neurosurgery                  | 374.49      | 518.96      | 483.66      | 340.21      | 327.09      | 117.33      | 113.03      | 108.60      | 121.46      | 0           |
| Obstetrics and Gynecology     | 143.68      | 142.88      | 126.34      | 130.71      | 139.49      | 138.61      | 0           | 58.71       | 68.05       | 121.03      |
| Ophthalmology                 | 1044.94     | 1191.91     | 962.15      | 936.54      | 896.10      | 838.56      | 834.51      | 920.85      | 910.75      | 891.43      |
| Orthopedics                   | 126.20      | 128.06      | 123.40      | 159.49      | 159.80      | 184.41      | 183.39      | 181.70      | 236.51      | 236.51      |
| Otolaryngology                | 539.17      | 520.92      | 493.72      | 475.65      | 318.33      | 242.09      | 64.56       | 569.30      | 524.67      | 785.66      |
| Pathology                     | 1669.05     | 1201.52     | 2648.08     | 2685.00     | 2537.14     | 3274.77     | 2774.65     | 1105.85     | 1017.10     | 1295.16     |
| Pediatrics                    | 473.59      | 415.55      | 395.36      | 299.96      | 295.02      | 257.04      | 245.91      | 183.70      | 192.70      | 283.01      |
| Physical Medicine & Rehab     | 0           | 0           | 0           | 0           | 0           | 0           | 0           | 0           | 0           | 0           |
| Psychiatry                    | 461.43      | 454.04      | 523.37      | 431.27      | 485.37      | 354.58      | 305.35      | 248.26      | 224.58      | 251.57      |
| Radiation-Diagnostic/Oncology | 87.87       | 107.87      | 113.69      | 155.26      | 306.04      | 173.72      | 222.79      | 212.66      | 273.83      | 312.30      |
| Surgery                       | 959.11      | 834.32      | 964.72      | 633.35      | 1001.65     | 1008.56     | 1502.64     | 1353.30     | 1166.66     | 1671.84     |
| Urology                       | 492.04      | 482.37      | 403.34      | 541.80      | 544.71      | 641.88      | 0           | 0           | 0           | 0           |
| <b>U01</b>                    | <b>2011</b> | <b>2012</b> | <b>2013</b> | <b>2014</b> | <b>2015</b> | <b>2016</b> | <b>2017</b> | <b>2018</b> | <b>2019</b> | <b>2020</b> |
| Anesthesiology                | 82.34       | 78.08       | 86.27       | 169.91      | 143.55      | 290.84      | 216.78      | 199.31      | 270.34      | 242.66      |
| Dermatology                   | 74.83       | 225.95      | 216.31      | 194.10      | 348.67      | 231.45      | 264.07      | 290.01      | 653.25      | 420.90      |
| Emergency Medicine            | 536.81      | 473.85      | 220.31      | 182.80      | 111.41      | 80.69       | 152.40      | 577.1       | 43.66       | 316.01      |
| Family Medicine               | 49.45       | 76.23       | 81.82       | 89.31       | 106.29      | 85.84       | 55.19       | 76.33       | 84.37       | 68.42       |
| Internal Medicine/Medicine    | 3621.03     | 3495.78     | 3850.67     | 3696.26     | 3241.76     | 3097.05     | 3393.64     | 3568.23     | 5128.75     | 5808.65     |
| Neurology                     | 4780.51     | 5279.12     | 5436.02     | 5968.05     | 4829.93     | 6481.36     | 5132.2      | 8026.10     | 7273.08     | 9843.68     |
| Neurosurgery                  | 913.42      | 899.29      | 3027.48     | 2859.72     | 2140.20     | 4737.37     | 4929.55     | 2461.91     | 1190.18     | 972.87      |
| Obstetrics and Gynecology     | 629.11      | 419.96      | 127.76      | 267.54      | 1143.03     | 234.52      | 211.01      | 291.24      | 188.14      | 198.16      |
| Ophthalmology                 | 130.77      | 135.16      | 105.76      | 73.45       | 159.59      | 199.27      | 205.96      | 323.00      | 352.57      | 411.20      |
| Orthopedics                   | 0           | 0           | 26.92       | 34.13       | 10.27       | 10.31       | 0           | 0           | 36.97       | 34          |
| Otolaryngology                | 153.02      | 89.48       | 122.50      | 112.01      | 277.47      | 253.36      | 304.57      | 417.28      | 220.01      | 318.12      |
| Pathology                     | 3022.3      | 2069.4      | 1985.57     | 1456.02     | 1478.29     | 1902.17     | 2107.76     | 2552.67     | 2365.47     | 2545.45     |
| Pediatrics                    | 1766.44     | 1777.68     | 1619.25     | 1776.41     | 1633.86     | 1466.35     | 1454.22     | 1477.21     | 1365.27     | 1218.99     |
| Physical Medicine & Rehab     | 66.88       | 71.50       | 426.53      | 385.64      | 424.59      | 391.49      | 382.60      | 203.00      | 520.23      | 799.24      |
| Plastic Surgery               | 0           | 0           | 0           | 0           | 0           | 0           | 0           | 59.53       | 58.82       | 58.82       |
| Psychiatry                    | 1085.13     | 1553.90     | 1433.67     | 1624.39     | 1785.65     | 1563.86     | 1344.58     | 1522.54     | 2389.77     | 2034.94     |
| Radiation-Diagnostic/Oncology | 204.33      | 244.96      | 367.51      | 449.29      | 506.26      | 441.85      | 881.23      | 923.37      | 958.93      | 929.28      |
| Surgery                       | 1118.53     | 1522.26     | 1540.99     | 1359.58     | 1590.53     | 1420.41     | 1271.76     | 1548.58     | 157.381     | 1279.99     |
| Urology                       | 1369.09     | 1157.66     | 1208.71     | 790.08      | 667.87      | 736.47      | 770.23      | 687.61      | 1040.73     | 505.66      |

Inflation-Adjusted Dollar amount for each NIH advanced career grant (R01, R03, R21, P30, U01) spent per active physician from 2011-2020 by specialty

| R01                           | 2011     | 2012     | 2013     | 2014     | 2015     | 2016     | 2017     | 2018     | 2019     | 2020     |
|-------------------------------|----------|----------|----------|----------|----------|----------|----------|----------|----------|----------|
| Anesthesiology                | 1857.17  | 2047.99  | 1931.48  | 2031.25  | 1907.71  | 1915.65  | 1930.22  | 2232.64  | 2285.73  | 2463.85  |
| Dermatology                   | 3680.31  | 3885.13  | 3526.22  | 3230.02  | 3180.43  | 3282.39  | 3015.51  | 3526.49  | 3525.69  | 3422.12  |
| Emergency Medicine            | 356.59   | 355.81   | 357.40   | 382.25   | 392.96   | 419.59   | 459.64   | 492.28   | 600.32   | 774.93   |
| Family Medicine               | 352.34   | 378.28   | 327.08   | 289.76   | 327.61   | 319.48   | 311.93   | 346.48   | 339.97   | 383.63   |
| Internal Medicine/Medicine    | 11841.01 | 11171.16 | 9988.96  | 9954.83  | 9770.64  | 10420.17 | 10999.52 | 11476.32 | 11964.22 | 12867.53 |
| Neurology                     | 16516.17 | 16723.43 | 15648.83 | 15484.14 | 15336.52 | 16815.14 | 18768.82 | 21539.61 | 21477.72 | 25392.40 |
| Neurosurgery                  | 9547.89  | 9789.90  | 8745.41  | 8569.79  | 10713.90 | 11124.49 | 11446.67 | 12176.25 | 12993.19 | 14695.02 |
| Obstetrics and Gynecology     | 1242.54  | 1137.52  | 1131.77  | 1103.78  | 1175.71  | 1423.22  | 1650.70  | 1669.24  | 1990.32  | 2326.07  |
| Ophthalmology                 | 8000.73  | 7948.37  | 7553.12  | 8004.87  | 7439.34  | 7332.12  | 7612.48  | 7923.10  | 8428.94  | 8877.37  |
| Orthopedics                   | 1898.66  | 2042.87  | 2193.01  | 2184.23  | 2056.45  | 2292.59  | 2492.32  | 2597.04  | 2786.66  | 3171.38  |
| Otolaryngology                | 5631.72  | 5908.82  | 5826.16  | 5872.72  | 6303.54  | 6236.54  | 6463.05  | 7255.41  | 8197.88  | 8036.22  |
| Pathology                     | 21647.85 | 21800.50 | 20720.71 | 19580.52 | 20260.44 | 21005.41 | 21138.62 | 23314.32 | 24886.76 | 26404.35 |
| Pediatrics                    | 5629.26  | 5907.28  | 5340.64  | 5375.82  | 5105.01  | 4992.74  | 4668.38  | 4875.54  | 4967.00  | 5602.81  |
| Physical Medicine & Rehab     | 1322.77  | 1475.20  | 1429.65  | 1579.87  | 1395.17  | 1757.99  | 2291.52  | 2521.46  | 2544.68  | 2714.78  |
| Plastic Surgery               | 141.77   | 0.00     | 74.65    | 40.90    | 0.00     | 0.00     | 42.53    | 0.00     | 33.89    | 0.00     |
| Psychiatry                    | 12281.68 | 11935.88 | 10499.14 | 10592.16 | 9933.98  | 10545.85 | 10844.45 | 11430.88 | 11500.29 | 12132.67 |
| Radiation-Diagnostic/Oncology | 6337.9   | 5830.94  | 5179.30  | 4987.09  | 5122.90  | 5465.35  | 5874.80  | 6449.13  | 6456.90  | 6512.38  |
| Surgery                       | 5574.43  | 5346.64  | 4878.63  | 5047.13  | 5289.88  | 5355.64  | 5930.12  | 6222.28  | 6915.37  | 7737.01  |
| Urology                       | 2443.77  | 2515.79  | 2469.45  | 2246.21  | 2069.70  | 1937.56  | 2135.08  | 2137.80  | 2153.51  | 2392.02  |
| R03                           | 2011     | 2012     | 2013     | 2014     | 2015     | 2016     | 2017     | 2018     | 2019     | 2020     |
| Anesthesiology                | 11.22    | 17.51    | 10.48    | 12.28    | 7.30     | 6.88     | 8.44     | 16.19    | 16.37    | 12.80    |
| Dermatology                   | 30.12    | 36.84    | 12.83    | 26.09    | 50.33    | 55.03    | 40.52    | 22.50    | 27.22    | 35.50    |
| Emergency Medicine            | 1.88     | 2.38     | 1.77     | 2.81     | 9.81     | 9.41     | 9.72     | 7.14     | 3.77     | 6.59     |
| Family Medicine               | 6.92     | 6.56     | 7.48     | 4.36     | 3.61     | 3.37     | 1.25     | 1.38     | 4.08     | 3.01     |
| Internal Medicine/Medicine    | 87.07    | 103.14   | 92.91    | 90.38    | 79.48    | 63.89    | 61.86    | 64.71    | 82.97    | 93.46    |
| Neurology                     | 74.68    | 49.48    | 62.74    | 74.94    | 87.83    | 115.55   | 91.77    | 75.79    | 94.85    | 89.10    |
| Neurosurgery                  | 77.53    | 150.06   | 143.21   | 69.61    | 103.89   | 61.00    | 26.66    | 25.44    | 24.36    | 84.81    |
| Obstetrics and Gynecology     | 14.88    | 20.91    | 18.05    | 18.48    | 16.84    | 22.40    | 29.13    | 29.35    | 22.99    | 15.43    |
| Ophthalmology                 | 0        | 0.00     | 0.00     | 10.03    | 13.65    | 4.02     | 5.71     | 9.07     | 14.59    | 14.73    |
| Orthopedics                   | 41.2     | 39.46    | 43.65    | 58.45    | 39.97    | 24.33    | 11.12    | 16.82    | 33.86    | 28.61    |
| Otolaryngology                | 186.14   | 240.57   | 246.24   | 198.85   | 187.44   | 165.05   | 171.95   | 120.99   | 28.63    | 41.87    |
| Pathology                     | 128.58   | 108.61   | 101.13   | 101.75   | 87.38    | 52.30    | 73.37    | 125.79   | 167.87   | 185.58   |
| Pediatrics                    | 52.63    | 42.41    | 46.27    | 43.31    | 49.12    | 64.15    | 48.41    | 57.05    | 46.33    | 52.70    |
| Physical Medicine & Rehab     | 79.07    | 61.41    | 49.96    | 62.86    | 42.12    | 39.63    | 16.81    | 45.78    | 75.05    | 64.08    |
| Plastic Surgery               | 0        | 0.00     | 0.00     | 0.00     | 0.00     | 10.08    | 9.91     | 0.00     | 0.00     | 0.00     |
| Psychiatry                    | 69.28    | 70.46    | 68.46    | 60.11    | 52.55    | 54.94    | 62.97    | 48.95    | 42.46    | 39.99    |
| Radiation-Diagnostic/Oncology | 24.15    | 14.49    | 18.97    | 34.13    | 37.40    | 17.17    | 21.24    | 34.67    | 47.11    | 44.41    |
| Surgery                       | 51.84    | 66.32    | 52.75    | 58.67    | 55.73    | 43.96    | 76.99    | 63.44    | 35.00    | 55.03    |
| Urology                       | 7.94     | 24.12    | 15.15    | 34.37    | 44.93    | 28.20    | 7.44     | 7.50     | 24.43    | 32.33    |
| R21                           | 2011     | 2012     | 2013     | 2014     | 2015     | 2016     | 2017     | 2018     | 2019     | 2020     |
| Anesthesiology                | 133.66   | 120.44   | 132.83   | 116.33   | 136.10   | 134.19   | 115.78   | 161.28   | 186.92   | 148.11   |
| Dermatology                   | 321.61   | 343.39   | 314.52   | 400.33   | 295.17   | 225.42   | 234.51   | 233.04   | 221.38   | 296.54   |
| Emergency Medicine            | 41.72    | 34.15    | 17.53    | 27.95    | 25.07    | 19.46    | 22.73    | 34.77    | 30.93    | 23.37    |
| Family Medicine               | 25.67    | 30.43    | 31.16    | 33.61    | 39.27    | 33.37    | 19.56    | 18.93    | 20.32    | 23.85    |
| Internal Medicine/Medicine    | 710.85   | 733.54   | 664.21   | 622.56   | 608.99   | 643.68   | 603.88   | 578.81   | 562.98   | 609.17   |
| Neurology                     | 999.05   | 1184.29  | 1076.63  | 1060.35  | 1062.42  | 1158.56  | 1160.26  | 1245.33  | 1593.65  | 1227.72  |
| Neurosurgery                  | 478.39   | 715.27   | 827.13   | 869.13   | 1275.22  | 1345.55  | 942.40   | 879.89   | 1784.94  | 1517.68  |
| Obstetrics and Gynecology     | 168.4    | 127.65   | 135.43   | 112.42   | 118.32   | 105.56   | 97.34    | 121.37   | 128.40   | 199.82   |
| Ophthalmology                 | 216.49   | 209.07   | 308.65   | 289.26   | 404.05   | 330.40   | 239.34   | 304.36   | 519.05   | 500.65   |
| Orthopedics                   | 139.37   | 181.35   | 168.92   | 131.96   | 140.60   | 141.80   | 247.04   | 330.99   | 221.61   | 231.16   |
| Otolaryngology                | 289.56   | 343.22   | 477.17   | 511.13   | 445.63   | 287.57   | 284.48   | 482.88   | 500.18   | 602.47   |
| Pathology                     | 1620.52  | 1459.48  | 1579.63  | 2021.66  | 2324.19  | 2356.36  | 2007.67  | 1702.83  | 1661.99  | 1754.86  |
| Pediatrics                    | 359.27   | 341.35   | 339.71   | 367.40   | 402.47   | 399.61   | 369.09   | 369.53   | 394.61   | 431.36   |
| Physical Medicine & Rehab     | 91.84    | 161.33   | 236.54   | 174.25   | 71.48    | 198.37   | 270.40   | 196.35   | 253.90   | 216.85   |
| Plastic Surgery               | 0        | 0.00     | 0.00     | 0.00     | 0.00     | 0.00     | 0.00     | 0.00     | 0.00     | 0.00     |
| Psychiatry                    | 658.75   | 905.85   | 989.24   | 917.20   | 788.66   | 760.91   | 755.89   | 717.34   | 755.07   | 872.28   |
| Radiation-Diagnostic/Oncology | 629.93   | 609.35   | 517.83   | 586.92   | 617.30   | 567.88   | 520.04   | 396.60   | 462.68   | 518.97   |
| Surgery                       | 423.69   | 406.62   | 342.36   | 383.99   | 474.94   | 493.24   | 362.04   | 338.53   | 352.65   | 420.58   |
| Urology                       | 165.44   | 173.35   | 82.71    | 71.47    | 171.89   | 231.66   | 161.78   | 122.63   | 130.05   | 189.90   |
| P30                           | 2011     | 2012     | 2013     | 2014     | 2015     | 2016     | 2017     | 2018     | 2019     | 2020     |
| Anesthesiology                | 0        | 0.00     | 0.00     | 23.04    | 0.00     | 0.00     | 0.00     | 0.00     | 0.00     | 0.00     |
| Dermatology                   | 517.27   | 383.83   | 513.97   | 565.01   | 517.67   | 580.33   | 495.15   | 238.70   | 216.49   | 214.14   |
| Emergency Medicine            | 0        | 0.00     | 0.00     | 0.00     | 0.00     | 0.00     | 0.00     | 0.00     | 0.00     | 0.00     |
| Family Medicine               | 0        | 4.38     | 4.19     | 4.09     | 3.99     | 3.92     | 12.04    | 12.54    | 14.96    | 16.91    |
| Internal Medicine/Medicine    | 2716.56  | 2859.64  | 2948.10  | 3325.16  | 2944.45  | 2996.87  | 3015.02  | 2952.95  | 3299.36  | 3523.49  |
| Neurology                     | 1056.37  | 1134.75  | 1026.00  | 923.97   | 933.90   | 998.77   | 971.23   | 1064.05  | 1303.34  | 2987.19  |
| Neurosurgery                  | 374.49   | 509.63   | 466.42   | 321.85   | 305.94   | 108.84   | 103.02   | 96.73    | 106.11   | 0.00     |
| Obstetrics and Gynecology     | 143.68   | 140.31   | 121.84   | 123.66   | 130.47   | 128.58   | 0.00     | 52.29    | 59.45    | 104.34   |
| Ophthalmology                 | 1044.94  | 1170.49  | 927.85   | 886.01   | 838.17   | 777.91   | 760.60   | 820.18   | 795.62   | 768.54   |
| Orthopedics                   | 126.2    | 125.76   | 119.00   | 150.88   | 149.47   | 171.07   | 167.15   | 161.84   | 207.79   | 203.91   |
| Otolaryngology                | 539.17   | 511.56   | 476.12   | 449.98   | 297.75   | 224.58   | 58.84    | 507.06   | 458.34   | 677.35   |
| Pathology                     | 1669.05  | 1179.93  | 2553.67  | 2540.12  | 2373.11  | 3037.92  | 2528.92  | 984.96   | 888.52   | 1116.61  |
| Pediatrics                    | 473.59   | 408.08   | 381.26   | 283.77   | 275.95   | 238.45   | 224.13   | 163.62   | 168.34   | 243.99   |
| Physical Medicine & Rehab     | 0        | 0.00     | 0.00     | 0.00     | 0.00     | 0.00     | 0.00     | 0.00     | 0.00     | 0.00     |
| Psychiatry                    | 461.43   | 445.88   | 504.71   | 408.00   | 453.99   | 328.93   | 278.31   | 221.12   | 196.19   | 216.89   |
| Radiation-Diagnostic/Oncology | 87.87    | 105.93   | 109.64   | 146.88   | 286.25   | 161.16   | 203.06   | 189.41   | 239.21   | 269.25   |
| Surgery                       | 959.11   | 819.33   | 930.32   | 599.18   | 936.89   | 935.62   | 1369.56  | 1205.36  | 1019.18  | 1441.36  |
| Urology                       | 492.04   | 473.70   | 388.96   | 512.57   | 509.49   | 595.46   | 0.00     | 0.00     | 0.00     | 0.00     |
| U01                           | 2011     | 2012     | 2013     | 2014     | 2015     | 2016     | 2017     | 2018     | 2019     | 2020     |
| Anesthesiology                | 82.34    | 76.68    | 83.19    | 160.74   | 134.27   | 269.80   | 197.58   | 177.52   | 236.16   | 209.21   |
| Dermatology                   | 74.83    | 221.89   | 208.60   | 183.63   | 326.13   | 214.71   | 240.68   | 258.31   | 570.67   | 362.88   |

|                               |         |         |         |         |         |         |         |         |         |         |
|-------------------------------|---------|---------|---------|---------|---------|---------|---------|---------|---------|---------|
| Emergency Medicine            | 536.81  | 465.33  | 212.46  | 172.94  | 104.21  | 74.85   | 138.90  | 514.01  | 38.14   | 272.45  |
| Family Medicine               | 49.45   | 74.86   | 78.90   | 84.49   | 99.42   | 79.63   | 50.30   | 67.99   | 73.70   | 58.99   |
| Internal Medicine/Medicine    | 3621.03 | 3432.95 | 3713.38 | 3496.82 | 3032.18 | 2873.05 | 3093.09 | 3178.15 | 4480.40 | 5007.88 |
| Neurology                     | 4780.51 | 5184.24 | 5242.20 | 5646.02 | 4517.67 | 6012.59 | 4677.68 | 7148.68 | 6353.65 | 8486.64 |
| Neurosurgery                  | 913.42  | 883.13  | 2919.54 | 2705.41 | 2001.84 | 4394.74 | 4492.97 | 2192.77 | 1039.72 | 838.75  |
| Obstetrics and Gynecology     | 629.11  | 412.41  | 123.20  | 253.10  | 1069.13 | 217.56  | 192.32  | 259.40  | 164.36  | 170.84  |
| Ophthalmology                 | 130.77  | 132.73  | 101.99  | 69.49   | 149.27  | 184.86  | 187.72  | 287.69  | 308.00  | 354.51  |
| Orthopedics                   | 0       | 0.00    | 25.96   | 32.29   | 9.61    | 9.56    | 0.00    | 0.00    | 32.30   | 29.31   |
| Otolaryngology                | 153.02  | 87.87   | 118.13  | 105.97  | 259.53  | 235.04  | 277.60  | 371.66  | 192.20  | 274.26  |
| Pathology                     | 3022.5  | 2032.21 | 1914.78 | 1377.46 | 1382.72 | 1764.59 | 1921.09 | 2273.61 | 2066.44 | 2194.54 |
| Pediatrics                    | 1766.44 | 1745.73 | 1561.52 | 1680.56 | 1528.23 | 1360.30 | 1325.43 | 1315.72 | 1192.68 | 1050.94 |
| Physical Medicine & Rehab     | 66.88   | 70.22   | 411.32  | 364.83  | 397.14  | 363.18  | 348.72  | 180.81  | 454.46  | 689.06  |
| Plastic Surgery               | 0       | 0.00    | 0.00    | 0.00    | 0.00    | 0.00    | 0.00    | 53.02   | 51.38   | 50.71   |
| Psychiatry                    | 1085.13 | 1525.97 | 1382.55 | 1536.74 | 1670.21 | 1450.75 | 1225.50 | 1356.09 | 2087.67 | 1754.41 |
| Radiation-Diagnostic/Oncology | 204.33  | 240.56  | 354.41  | 425.05  | 473.53  | 409.89  | 803.19  | 822.43  | 837.71  | 801.17  |
| Surgery                       | 1118.53 | 1494.90 | 1486.05 | 1286.22 | 1487.70 | 1317.68 | 1159.13 | 1379.29 | 137.49  | 1103.53 |
| Urology                       | 1369.09 | 1136.85 | 1165.61 | 747.45  | 624.69  | 683.20  | 702.02  | 612.44  | 909.17  | 435.95  |

Supplementary Table 13: Mean NIH training grant (F32, T32) funding amount from 2011-2020 by specialty

| F32                           | 2011       | 2012       | 2013       | 2014       | 2015       | 2016       | 2017       | 2018       | 2019       | 2020       |
|-------------------------------|------------|------------|------------|------------|------------|------------|------------|------------|------------|------------|
| Anesthesiology                | 47,914.25  | 51,490.00  | 49,633.25  | 43,534.29  | 23,741.00  | 58,002.00  | 57,066.00  | 57,560.40  | 60,918.00  | 64,990.00  |
| Dermatology                   | 43,343.50  | 55,754.00  | 51,857.67  | 42,836.00  | 49,628.00  | 55,554.00  | 46,238.00  | 58,179.75  | 66,110.00  | 65,894.00  |
| Emergency Medicine            | 59,234.00  | 54,033.00  | 62,234.00  | -          | -          | -          | -          | -          | -          | 65,310.00  |
| Family Medicine               | -          | -          | -          | 56,030.00  | 20,307.00  | -          | -          | -          | -          | -          |
| Internal Medicine/Medicine    | 51,926.46  | 51,811.16  | 50,429.82  | 51,319.95  | 53,518.16  | 53,923.50  | 47,240.95  | 55,961.90  | 61,755.06  | 66,378.50  |
| Neurology                     | 48,824.33  | 44,860.50  | 48,197.95  | 49,647.19  | 50,244.97  | 56,367.65  | 42,558.86  | 56,279.00  | 54,616.14  | 63,340.64  |
| Neurosurgery                  | 52,676.12  | 45,676.25  | 42,293.62  | 51,613.00  | 50,253.00  | 53,844.20  | 58,787.33  | 53,451.73  | 55,313.00  | 60,524.92  |
| Obstetrics and Gynecology     | 52,343.00  | 48,368.00  | 43,787.75  | 53,768.00  | 55,170.80  | 57,281.00  | 48,730.00  | 59,250.00  | 62,027.60  | 60,798.40  |
| Ophthalmology                 | 45,094.75  | 50,123.71  | 55,008.00  | 54,536.44  | 53,676.33  | 49,738.75  | 43,040.30  | 59,953.43  | 59,131.89  | 56,727.30  |
| Orthopedics                   | 49,338.00  | 48,075.67  | 50,392.60  | 46,269.20  | 53,574.33  | 48,082.83  | 55,240.00  | 61,271.14  | 63,762.00  | 67,321.00  |
| Otolaryngology                | 52,747.00  | 54,843.71  | 50,681.71  | 50,843.50  | 49,508.33  | 57,822.62  | 42,489.86  | 54,204.30  | 62,456.62  | 72,395.00  |
| Pathology                     | 51,873.14  | 50,886.24  | 43,413.09  | 46,494.82  | 52,489.91  | 54,737.84  | 37,180.08  | 61,869.82  | 61,228.88  | 55,828.23  |
| Pediatrics                    | 53,559.40  | 52,427.22  | 51,929.29  | 51,190.00  | 48,164.61  | 45,491.18  | 49,132.40  | 58,639.23  | 60,939.11  | 55,600.83  |
| Physical Medicine & Rehab     | 51,326.00  | 51,821.00  | -          | 55,982.00  | 40,795.00  | 68,949.00  | 62,763.00  | 61,516.50  | 65,694.00  | 68,436.00  |
| Plastic Surgery               | -          | -          | -          | -          | -          | -          | -          | -          | 70,552.00  | -          |
| Psychiatry                    | 49,255.31  | 47,980.59  | 47,068.46  | 48,248.08  | 52,733.33  | 53,797.79  | 40,610.76  | 55,418.88  | 58,605.48  | 63,169.34  |
| Radiation-Diagnostic/Oncology | 50,566.64  | 49,940.50  | 37,040.60  | 55,094.00  | 55,880.00  | 53,115.56  | 47,848.12  | 61,253.57  | 67,271.25  | 65,120.57  |
| Surgery                       | 48,888.53  | 50,666.33  | 50,921.23  | 51,721.74  | 54,732.95  | 51,360.80  | 55,393.12  | 64,262.30  | 67,220.20  | 72,716.73  |
| Urology                       | 58,202.00  | 53,066.00  | 55,670.00  | 44,500.00  | 60,380.00  | 40,588.67  | 39,434.67  | 74,086.00  | 65,606.00  | 80,358.00  |
| T32                           | 2011       | 2012       | 2013       | 2014       | 2015       | 2016       | 2017       | 2018       | 2019       | 2020       |
| Anesthesiology                | 177,313.40 | 176,064.90 | 194,942.40 | 191,664.00 | 229,197.30 | 261,418.50 | 214,919.70 | 265,184.00 | 254,169.90 | 299,745.20 |
| Dermatology                   | 187,196.80 | 188,549.20 | 188,549.20 | 167,228.80 | 214,451.50 | 214,313.90 | 206,142.70 | 217,967.20 | 279,571.00 | 254,416.00 |
| Emergency Medicine            | -          | -          | -          | -          | -          | 168,966.00 | 369,797.00 | 446,984.50 | 458,056.00 | 365,562.00 |
| Family Medicine               | 246,991.00 | 292,899.00 | 254,736.30 | 297,305.80 | 376,785.20 | 332,118.50 | 243,977.20 | 347,868.00 | 368,096.20 | 349,901.40 |
| Internal Medicine/Medicine    | 301,089.20 | 298,071.10 | 312,795.30 | 315,749.30 | 340,196.50 | 351,412.10 | 265,624.40 | 362,508.90 | 387,754.70 | 381,541.10 |
| Neurology                     | 257,944.60 | 248,875.60 | 259,835.60 | 313,442.20 | 310,645.00 | 332,014.40 | 284,266.30 | 313,233.30 | 259,761.20 | 311,463.30 |
| Neurosurgery                  | 197,192.30 | 177,160.70 | 193,940.30 | 199,963.30 | 347,813.40 | 363,970.00 | 273,969.30 | 568,351.80 | 611,950.20 | 501,294.40 |
| Obstetrics and Gynecology     | 199,358.80 | 216,580.20 | 210,501.20 | 238,399.90 | 223,788.80 | 244,205.40 | 165,655.80 | 237,966.30 | 220,205.90 | 260,306.00 |
| Ophthalmology                 | 191,942.20 | 198,428.80 | 211,319.40 | 231,037.90 | 235,602.10 | 214,293.00 | 139,347.60 | 184,728.10 | 187,265.60 | 206,601.10 |
| Orthopedics                   | 218,841.90 | 231,324.10 | 227,927.00 | 231,027.90 | 240,819.90 | 239,498.30 | 229,004.50 | 223,953.60 | 239,265.70 | 259,178.40 |
| Otolaryngology                | 206,410.50 | 278,268.20 | 258,790.70 | 262,284.30 | 264,087.20 | 251,168.30 | 149,735.40 | 257,186.90 | 267,736.80 | 301,986.80 |
| Pathology                     | 380,784.30 | 389,268.50 | 374,945.80 | 340,587.00 | 359,971.80 | 343,585.70 | 281,690.50 | 368,287.30 | 386,528.50 | 366,898.70 |
| Pediatrics                    | 226,569.60 | 242,487.10 | 251,749.30 | 248,890.50 | 272,019.20 | 292,232.50 | 249,166.00 | 332,139.50 | 338,472.10 | 358,133.20 |
| Physical Medicine & Rehab     | 159,013.20 | 266,958.20 | 272,975.00 | 281,319.30 | 313,034.30 | 250,943.80 | 212,667.80 | 257,476.20 | 315,693.50 | 320,902.00 |
| Plastic Surgery               | -          | -          | -          | -          | -          | -          | -          | -          | -          | -          |
| Psychiatry                    | 260,461.80 | 261,552.40 | 254,036.70 | 241,928.30 | 255,408.40 | 286,070.20 | 197,495.20 | 312,247.00 | 333,855.00 | 367,256.80 |
| Radiation-Diagnostic/Oncology | 253,584.50 | 204,744.00 | 211,428.10 | 187,940.40 | 195,605.00 | 266,952.50 | 181,965.90 | 243,591.80 | 259,048.50 | 255,330.70 |
| Surgery                       | 233,508.00 | 219,160.50 | 208,387.80 | 225,132.50 | 218,762.10 | 251,569.50 | 231,538.90 | 302,109.40 | 307,981.10 | 298,942.30 |
| Urology                       | 154,911.30 | 152,947.90 | 164,463.90 | 145,810.40 | 129,597.00 | 151,069.50 | 155,845.80 | 167,294.00 | 247,190.80 | 288,956.20 |

Inflation-Adjusted Mean NIH training grant (F32, T32) funding amount from 2011-2020 by specialty

| F32                           | 2011      | 2012      | 2013      | 2014      | 2015      | 2016      | 2017      | 2018      | 2019      | 2020      |
|-------------------------------|-----------|-----------|-----------|-----------|-----------|-----------|-----------|-----------|-----------|-----------|
| Anesthesiology                | 47,914.25 | 50,564.63 | 47,863.62 | 41,185.25 | 22,206.14 | 53,806.97 | 52,012.07 | 51,267.85 | 53,217.04 | 56,030.55 |
| Dermatology                   | 43,343.50 | 54,752.00 | 50,008.73 | 40,524.64 | 46,419.54 | 51,536.02 | 42,143.03 | 51,819.50 | 57,752.69 | 56,809.93 |
| Emergency Medicine            | 59,234.00 | 53,061.93 | 60,015.10 | -         | -         | -         | -         | -         | -         | 56,306.44 |
| Family Medicine               | -         | -         | -         | 56,030.00 | 20,307.00 | -         | -         | -         | -         | -         |
| Internal Medicine/Medicine    | 51,926.46 | 50,880.02 | 48,631.79 | 48,550.81 | 50,058.20 | 50,023.45 | 43,057.15 | 49,844.10 | 53,948.28 | 57,227.64 |
| Neurology                     | 48,824.33 | 44,054.28 | 46,479.50 | 46,968.31 | 46,996.62 | 52,290.82 | 38,789.72 | 50,126.54 | 47,711.83 | 54,608.57 |
| Neurosurgery                  | 52,676.12 | 44,855.37 | 40,785.68 | 48,828.05 | 47,004.14 | 49,949.88 | 53,580.95 | 47,608.35 | 48,320.59 | 52,181.02 |
| Obstetrics and Gynecology     | 52,343.00 | 47,498.74 | 42,226.54 | 50,866.76 | 51,604.00 | 53,138.11 | 44,414.33 | 52,772.74 | 54,186.37 | 52,416.80 |
| Ophthalmology                 | 45,094.75 | 49,222.90 | 53,046.74 | 51,593.74 | 50,206.15 | 46,141.36 | 39,228.53 | 53,399.28 | 51,656.72 | 48,906.94 |
| Orthopedics                   | 49,338.00 | 47,211.67 | 48,595.90 | 43,772.59 | 50,110.74 | 44,605.21 | 50,347.79 | 54,572.93 | 55,701.51 | 58,040.20 |
| Otolaryngology                | 52,747.00 | 53,858.07 | 48,874.70 | 48,100.07 | 46,307.61 | 53,640.56 | 38,726.83 | 48,278.64 | 54,561.15 | 62,414.71 |
| Pathology                     | 51,873.14 | 49,971.73 | 41,865.24 | 43,986.03 | 49,096.43 | 50,778.89 | 33,887.30 | 55,106.16 | 53,488.62 | 48,131.81 |
| Pediatrics                    | 53,559.40 | 51,485.01 | 50,077.80 | 48,427.87 | 45,050.76 | 42,201.00 | 44,781.09 | 52,228.74 | 53,235.48 | 47,935.76 |
| Physical Medicine & Rehab     | 51,326.00 | 50,889.69 | -         | 52,961.30 | 38,157.60 | 63,962.22 | 57,204.53 | 54,791.47 | 57,389.28 | 59,001.49 |
| Plastic Surgery               | -         | -         | -         | -         | -         | -         | -         | -         | -         | -         |
| Psychiatry                    | 49,255.31 | 47,118.30 | 45,390.28 | 45,644.69 | 49,324.11 | 49,906.83 | 37,014.15 | 49,360.45 | 51,196.85 | 54,460.89 |
| Radiation-Diagnostic/Oncology | 50,566.64 | 49,042.98 | 35,719.95 | 52,121.22 | 52,267.35 | 49,273.94 | 43,610.55 | 54,557.28 | 58,767.14 | 56,143.12 |
| Surgery                       | 48,888.53 | 49,755.77 | 49,105.68 | 48,930.92 | 51,194.46 | 47,646.10 | 50,487.34 | 57,237.10 | 58,722.54 | 62,692.09 |
| Urology                       | 58,202.00 | 52,112.31 | 53,685.14 | 42,098.85 | 56,476.42 | 48,126.51 | 35,942.22 | 65,986.86 | 57,312.40 | 69,279.94 |



| T32                            | 2011       | 2012       | 2013       | 2014       | 2015       | 2016       | 2017       | 2018       | 2019       | 2020       |
|--------------------------------|------------|------------|------------|------------|------------|------------|------------|------------|------------|------------|
| Anesthesiology                 | 177,313.40 | 172,900.71 | 187,991.91 | 181,322.12 | 214,379.66 | 242,511.23 | 195,885.79 | 236,193.88 | 222,038.95 | 258,422.67 |
| Dermatology                    | 187,196.80 | 200,172.91 | 181,826.65 | 158,205.40 | 200,587.18 | 198,813.50 | 187,886.10 | 194,138.86 | 244,228.96 | 219,342.50 |
| Emergency Medicine             | -          | -          | -          | -          | -          | -          | -          | -          | -          | -          |
| Family Medicine                | 246,991.00 | 287,635.09 | 245,653.91 | 281,263.65 | 352,425.98 | 308,097.80 | 222,369.87 | 309,838.80 | 321,563.23 | 301,664.40 |
| Internal Medicine/ Medicine    | 301,089.20 | 292,714.24 | 301,642.87 | 298,711.97 | 318,202.74 | 325,995.98 | 242,099.93 | 322,879.15 | 338,736.59 | 328,942.29 |
| Neurology                      | 257,944.60 | 244,402.87 | 250,571.40 | 296,529.36 | 290,561.75 | 308,001.23 | 259,090.85 | 278,990.40 | 226,923.42 | 268,525.33 |
| Neurosurgery                   | 197,192.30 | 173,976.81 | 187,025.53 | 189,173.60 | 325,327.21 | 337,645.62 | 249,705.78 | 506,219.15 | 534,590.36 | 432,186.53 |
| Obstetrics and Gynecology      | 199,358.80 | 212,687.88 | 202,995.97 | 225,536.22 | 209,320.82 | 226,543.08 | 150,984.84 | 211,951.64 | 192,368.52 | 224,420.52 |
| Ophthalmology                  | 191,942.20 | 194,862.69 | 203,785.00 | 218,571.46 | 220,370.39 | 198,794.11 | 127,006.57 | 164,533.48 | 163,592.37 | 178,119.31 |
| Orthopedics                    | 218,841.90 | 227,166.80 | 219,800.47 | 218,562.00 | 225,250.86 | 222,176.42 | 208,723.20 | 199,470.82 | 209,018.87 | 223,448.37 |
| Otolaryngology                 | 206,410.50 | 273,267.23 | 249,563.75 | 248,131.86 | 247,013.92 | 233,002.38 | 136,474.40 | 229,071.03 | 233,890.79 | 260,355.25 |
| Pathology                      | 380,784.30 | 382,272.67 | 361,577.45 | 322,209.47 | 336,699.57 | 318,735.63 | 256,743.17 | 328,025.85 | 337,665.40 | 316,318.47 |
| Pediatrics                     | 226,569.60 | 238,129.18 | 242,773.41 | 235,460.77 | 254,433.12 | 271,096.59 | 227,099.14 | 295,829.76 | 295,684.06 | 308,761.37 |
| Physical Medicine & Rehab      | 159,013.20 | 262,160.50 | 263,242.32 | 266,139.76 | 292,796.58 | 232,794.12 | 193,833.32 | 229,328.70 | 275,785.03 | 276,662.82 |
| Plastic Surgery                | -          | -          | -          | -          | -          | -          | -          | -          | -          | -          |
| Psychiatry                     | 260,461.80 | 256,851.85 | 244,979.25 | 228,874.24 | 238,896.21 | 265,379.98 | 180,004.45 | 278,111.92 | 291,650.64 | 316,627.20 |
| Radiation-Diagnostic/ Oncology | 253,584.50 | 201,064.39 | 203,889.82 | 177,799.44 | 182,959.11 | 247,644.98 | 165,850.47 | 216,962.16 | 226,300.82 | 220,131.11 |
| Surgery                        | 233,508.00 | 215,221.80 | 200,957.92 | 212,984.71 | 204,619.10 | 233,374.57 | 211,033.14 | 269,082.57 | 269,047.59 | 257,730.46 |
| Urology                        | 154,911.30 | 150,199.16 | 158,600.09 | 137,942.70 | 121,218.53 | 140,143.30 | 142,043.64 | 149,005.29 | 215,942.11 | 249,121.03 |

Supplementary Table 14: Mean NIH career development grant (K01, K08, K223) funding amount from 2011-2020 by specialty

| K01                            | 2011       | 2012       | 2013       | 2014       | 2015       | 2016       | 2017       | 2018       | 2019       | 2020       |
|--------------------------------|------------|------------|------------|------------|------------|------------|------------|------------|------------|------------|
| Anesthesiology                 | 120,086.20 | 121,151.50 | 115,788.80 | 122,631.20 | 176,829.40 | 177,605.20 | 171,822.00 | 151,097.00 | 131,069.00 | 141,491.00 |
| Dermatology                    | 93,785.25  | 116,732.20 | 99,330.00  | 111,210.00 | 107,873.70 | 111,286.00 | 116,404.90 | 103,161.40 | 102,986.40 | 117,490.50 |
| Emergency Medicine             | -          | 136,304.00 | 134,016.00 | 132,182.00 | 137,936.00 | -          | -          | 40,556.00  | 123,254.00 | 123,660.00 |
| Family Medicine                | 112,845.90 | 120,051.80 | 118,157.40 | 128,002.10 | 132,817.90 | 133,941.40 | 135,747.60 | 141,963.10 | 129,695.10 | 138,819.10 |
| Internal Medicine/ Medicine    | 127,509.60 | 123,147.00 | 123,903.40 | 130,004.80 | 129,290.10 | 132,724.20 | 144,242.50 | 142,969.40 | 143,327.00 | 140,742.80 |
| Neurology                      | 134,905.80 | 139,454.80 | 144,548.50 | 150,252.70 | 147,094.90 | 147,826.80 | 136,708.40 | 138,698.20 | 129,702.90 | 123,381.30 |
| Neurosurgery                   | 99,353.33  | 80,347.00  | 126,644.00 | -          | -          | 104,760.00 | -          | 158,780.50 | 151,324.70 | 109,357.30 |
| Obstetrics and Gynecology      | 139,635.50 | 171,026.00 | 156,377.50 | 159,980.20 | 155,728.00 | 148,407.80 | 136,159.00 | 128,488.00 | 127,963.10 | 139,234.20 |
| Ophthalmology                  | -          | -          | 131,122.00 | -          | -          | -          | 145,208.00 | 126,603.50 | 129,963.00 | 145,208.00 |
| Orthopedics                    | 123,579.60 | 117,938.50 | 115,494.70 | 121,495.10 | 110,510.50 | 126,430.90 | 124,989.00 | 123,020.40 | 116,702.50 | 117,502.00 |
| Otolaryngology                 | 137,182.00 | 137,182.00 | 137,188.00 | 129,952.00 | -          | -          | -          | -          | -          | 129,771.00 |
| Pathology                      | 118,330.60 | 116,786.60 | 113,168.80 | 107,158.60 | 115,922.80 | 167,622.70 | 161,973.60 | 147,423.50 | 121,876.90 | 131,635.80 |
| Pediatrics                     | 124,242.00 | 133,766.00 | 126,937.50 | 129,747.30 | 135,899.90 | 123,447.50 | 137,237.00 | 145,505.60 | 150,086.00 | 133,047.70 |
| Physical Medicine & Rehab      | 114,634.30 | 91,353.75  | 122,354.20 | 122,099.50 | 123,407.00 | 124,027.90 | 129,660.80 | 128,024.50 | 133,554.80 | 125,854.80 |
| Plastic Surgery                | -          | -          | -          | -          | -          | -          | -          | -          | -          | -          |
| Psychiatry                     | 148,655.30 | 144,651.20 | 145,283.70 | 152,443.40 | 149,052.30 | 151,938.30 | 149,647.70 | 156,758.20 | 154,175.90 | 150,847.70 |
| Radiation-Diagnostic/ Oncology | 122,974.40 | 130,706.80 | 116,722.90 | 143,148.50 | 122,157.10 | 137,792.70 | 142,346.30 | 135,374.40 | 128,713.10 | 137,445.50 |
| Surgery                        | 124,855.50 | 122,972.90 | 112,757.30 | 126,519.10 | 135,341.40 | 142,970.80 | 160,080.20 | 176,646.70 | 171,699.50 | 144,524.30 |
| Urology                        | 105,823.00 | 105,823.00 | 105,823.00 | 137,484.00 | 146,730.30 | 148,409.80 | 141,016.20 | 140,084.40 | 139,784.40 | 144,782.30 |
| K08                            | 2011       | 2012       | 2013       | 2014       | 2015       | 2016       | 2017       | 2018       | 2019       | 2020       |
| Anesthesiology                 | 125,868.50 | 130,766.60 | 138,082.60 | 151,676.50 | 163,094.40 | 171,524.70 | 166,395.30 | 180,576.00 | 180,629.80 | 173,059.70 |
| Dermatology                    | 123,634.20 | 121,501.10 | 113,992.10 | 108,300.60 | 120,100.30 | 161,198.20 | 139,880.80 | 163,778.70 | 143,989.70 | 162,867.30 |
| Emergency Medicine             | 141,586.00 | 142,015.50 | 125,040.90 | 148,179.80 | 149,105.00 | 155,894.10 | 162,261.10 | 160,546.60 | 159,030.30 | 160,115.70 |
| Family Medicine                | 122,205.80 | 123,184.80 | 135,554.20 | 137,668.00 | 148,187.00 | 145,819.00 | 168,048.00 | 168,048.00 | 171,562.00 | 167,957.70 |
| Internal Medicine/ Medicine    | 135,478.30 | 134,615.70 | 136,943.70 | 142,669.50 | 140,445.70 | 154,266.60 | 162,795.70 | 165,745.00 | 165,870.80 | 171,982.30 |
| Neurology                      | 162,383.80 | 160,599.20 | 168,910.60 | 175,436.80 | 156,846.60 | 164,111.20 | 183,334.50 | 189,698.70 | 186,428.20 | 189,501.70 |
| Neurosurgery                   | 165,681.90 | 170,939.90 | 160,663.30 | 164,708.70 | 150,693.80 | 155,605.60 | 158,727.40 | 182,594.00 | 182,323.80 | 180,507.00 |
| Obstetrics and Gynecology      | 134,050.10 | 134,579.40 | 136,049.00 | 119,664.60 | 121,878.00 | 124,569.00 | 166,888.00 | 181,463.60 | 184,982.20 | 186,092.80 |
| Ophthalmology                  | 204,350.20 | 210,972.40 | 184,014.60 | 212,911.40 | 203,695.00 | 194,094.20 | 203,772.30 | 195,569.10 | 202,154.30 | 195,095.20 |
| Orthopedics                    | 179,280.00 | 134,364.00 | 129,774.80 | 109,454.50 | 121,247.50 | 174,153.00 | 171,547.70 | 147,346.10 | 120,988.70 | 141,396.10 |
| Otolaryngology                 | 166,228.00 | 156,362.90 | 176,830.70 | 183,344.60 | 188,773.70 | 188,130.90 | 187,116.00 | 193,339.30 | 180,546.90 | 187,986.70 |
| Pathology                      | 127,919.40 | 129,889.90 | 127,000.10 | 147,248.60 | 142,633.30 | 163,702.00 | 152,111.60 | 167,191.40 | 174,799.40 | 174,170.30 |
| Pediatrics                     | 131,701.80 | 137,711.50 | 139,356.10 | 143,865.50 | 142,323.10 | 147,470.40 | 161,704.00 | 167,077.30 | 171,653.00 | 172,228.00 |
| Physical Medicine & Rehab      | 124,929.00 | 124,929.00 | 124,929.00 | -          | -          | -          | -          | 171,084.00 | 171,045.00 | 171,720.00 |
| Plastic Surgery                | -          | -          | -          | -          | -          | -          | -          | -          | -          | -          |
| Psychiatry                     | 167,165.70 | 162,011.70 | 156,512.70 | 160,774.70 | 168,384.70 | 169,355.80 | 170,572.30 | 160,770.60 | 171,369.90 | 177,536.00 |
| Radiation-Diagnostic/ Oncology | 162,287.60 | 163,995.20 | 163,995.20 | 152,487.80 | 138,629.30 | 171,720.00 | 177,445.30 | 203,390.30 | 206,262.70 | 208,723.60 |
| Surgery                        | 133,971.00 | 141,133.80 | 133,410.60 | 142,876.00 | 142,639.40 | 161,231.70 | 162,646.80 | 166,654.40 | 170,087.20 | 173,347.90 |
| Urology                        | 152,109.50 | 149,671.80 | 126,433.20 | 151,479.60 | 165,470.20 | 164,894.80 | 168,676.40 | 166,015.60 | 222,228.60 | 219,611.00 |
| K23                            | 2011       | 2012       | 2013       | 2014       | 2015       | 2016       | 2017       | 2018       | 2019       | 2020       |
| Anesthesiology                 | 133,340.70 | 155,830.60 | 141,449.70 | 156,572.20 | 154,426.80 | 153,813.90 | 172,864.50 | 179,465.90 | 180,755.90 | 175,125.70 |
| Dermatology                    | 122,563.30 | 122,675.50 | 83,995.33  | 123,012.00 | 85,710.67  | 167,154.20 | 173,453.20 | 151,582.90 | 155,709.10 | 167,417.10 |
| Emergency Medicine             | 130,236.80 | 140,747.70 | 154,086.90 | 154,124.70 | 147,563.30 | 163,834.90 | 177,780.20 | 175,407.00 | 178,953.30 | 172,696.90 |
| Family Medicine                | 154,195.60 | 156,956.10 | 150,109.50 | 146,538.00 | 107,960.80 | 146,244.80 | 161,528.00 | 160,174.80 | 164,166.00 | 157,210.60 |
| Internal Medicine/ Medicine    | 145,051.40 | 146,590.90 | 149,245.80 | 148,408.90 | 147,055.30 | 165,604.00 | 175,093.50 | 178,488.30 | 180,532.60 | 175,648.40 |
| Neurology                      | 147,474.40 | 151,874.90 | 162,050.10 | 167,642.70 | 165,994.60 | 163,494.20 | 182,582.00 | 176,333.10 | 177,608.00 | 184,799.30 |
| Neurosurgery                   | 185,974.00 | 177,987.20 | 184,467.40 | 173,711.80 | 167,926.40 | 145,447.80 | 183,568.00 | 183,766.00 | 185,417.40 | 187,105.50 |
| Obstetrics and Gynecology      | 133,524.90 | 129,024.90 | 126,127.10 | 121,042.70 | 115,983.90 | 129,604.80 | 163,354.60 | 169,060.50 | 173,401.20 | 169,482.20 |
| Ophthalmology                  | 190,213.70 | 213,359.00 | 203,372.30 | 203,470.50 | 207,128.10 | 203,477.50 | 217,257.90 | 193,281.00 | 214,918.40 | 211,700.00 |
| Orthopedics                    | 168,729.00 | 130,244.00 | 106,738.00 | 106,001.00 | 97,252.50  | 173,299.00 | 173,232.00 | 123,099.70 | 164,534.30 | 136,915.80 |
| Otolaryngology                 | 185,635.10 | 208,391.80 | 205,798.00 | 211,281.60 | 216,575.50 | 194,894.20 | 202,767.70 | 202,568.80 | 191,398.80 | 151,949.50 |
| Pathology                      | 129,132.00 | 133,431.30 | 132,375.00 | 135,050.00 | 138,577.00 | 136,984.00 | 146,011.00 | 142,388.00 | 190,080.00 | 175,913.00 |
| Pediatrics                     | 137,762.10 | 137,020.20 | 138,214.20 | 136,091.10 | 138,911.50 | 157,733.50 | 175,092.30 | 176,104.60 | 174,308.50 | 172,738.90 |
| Physical Medicine & Rehab      | 142,022.90 | 157,135.50 | 151,114.80 | 136,524.80 | 144,986.60 | 123,112.70 | 165,357.30 | 135,080.00 | 151,405.00 | 147,440.30 |
| Plastic Surgery                | -          | -          | -          | -          | -          | -          | -          | -          | -          | -          |
| Psychiatry                     | 160,234.10 | 155,582.30 | 161,932.10 | 162,780.60 | 156,467.60 | 164,714.30 | 177,292.20 | 173,883.30 | 175,900.20 | 173,824.60 |
| Radiation-Diagnostic/ Oncology | 158,602.70 | 164,772.20 | 157,904.80 | 162,607.20 | 161,641.00 | 173,602.00 | 180,637.50 | 179,685.00 | 195,696.00 | 192,598.70 |
| Surgery                        | 131,087.50 | 139,226.80 | 134,489.40 | 142,886.30 | 146,946.70 | 193,953.80 | 178,872.20 | 183,133.10 | 172,933.60 | 172,745.80 |
| Urology                        | 157,160.00 | 153,943.00 | 148,464.50 | 155,136.30 | 150,595.50 |            |            |            |            |            |

Inflation-Adjusted Mean NIH career development grant (K01, K08, K23) funding amount from 2011-2020 by specialty

|                                | 2011       | 2012       | 2013       | 2014       | 2015       | 2016       | 2017       | 2018       | 2019       | 2020       |
|--------------------------------|------------|------------|------------|------------|------------|------------|------------|------------|------------|------------|
| <b>K01</b>                     |            |            |            |            |            |            |            |            |            |            |
| Anesthesiology                 | 120,086.20 | 118,974.20 | 111,660.46 | 116,014.22 | 165,397.35 | 164,759.78 | 156,604.95 | 134,578.96 | 114,499.88 | 121,985.21 |
| Dermatology                    | 93,785.25  | 114,634.32 | 95,788.48  | 105,209.29 | 100,899.65 | 103,237.16 | 106,095.74 | 91,883.72  | 89,967.35  | 101,293.40 |
| Emergency Medicine             | -          | 133,854.38 | 129,237.78 | 125,049.67 | 129,018.42 | -          | -          | 36,122.39  | 107,672.81 | 106,612.38 |
| Family Medicine                | 112,845.90 | 117,894.26 | 113,944.60 | 121,095.31 | 124,231.20 | 124,254.00 | 123,725.40 | 126,443.59 | 113,299.66 | 119,681.66 |
| Internal Medicine/ Medicine    | 127,509.60 | 120,933.83 | 119,485.74 | 122,989.95 | 120,931.47 | 123,124.83 | 131,467.97 | 127,339.88 | 125,208.28 | 121,340.16 |
| Neurology                      | 134,905.80 | 136,948.55 | 139,394.75 | 142,145.30 | 137,585.19 | 137,135.13 | 124,601.11 | 123,535.61 | 113,306.48 | 106,372.10 |
| Neurosurgery                   | 99,353.33  | 78,903.02  | 122,128.62 | -          | -          | 97,183.16  | -          | 141,422.49 | 132,194.95 | 94,281.43  |
| Obstetrics and Gynecology      | 139,635.50 | 167,952.36 | 150,802.00 | 151,347.92 | 145,660.16 | 137,674.11 | 124,100.36 | 114,441.59 | 111,786.61 | 120,039.53 |
| Ophthalmology                  | -          | -          | -          | 124,046.87 | -          | -          | 132,347.96 | 112,763.11 | 113,533.69 | 125,189.79 |
| Orthopedics                    | 123,579.60 | 115,818.94 | 111,376.84 | 114,939.42 | 103,365.98 | 117,286.70 | 113,919.61 | 109,571.72 | 101,949.52 | 101,303.31 |
| Otolaryngology                 | 137,182.00 | 134,716.60 | 132,296.69 | 122,940.00 | -          | -          | -          | -          | -          | 111,880.92 |
| Pathology                      | 118,330.60 | 114,687.74 | 109,133.87 | 101,376.49 | 108,428.37 | 155,499.27 | 147,628.75 | 131,307.05 | 106,469.80 | -          |
| Pediatrics                     | 124,242.00 | 131,361.99 | 122,411.66 | 122,746.34 | 127,113.95 | 114,519.08 | 125,082.89 | 129,598.82 | 131,112.84 | 114,705.90 |
| Physical Medicine & Rehab      | 114,634.30 | 89,711.96  | 117,991.77 | 115,511.21 | 115,428.72 | 115,057.50 | 138,177.66 | 114,028.76 | 116,671.44 | 108,504.60 |
| Plastic Surgery                | -          | -          | -          | -          | -          | -          | -          | -          | -          | -          |
| Psychiatry                     | 148,655.30 | 142,051.57 | 140,103.74 | 144,217.80 | 139,416.05 | 140,949.26 | 136,394.47 | 139,621.27 | 134,685.71 | 130,052.01 |
| Radiation-Diagnostic/ Oncology | 122,974.40 | 128,357.77 | 112,561.25 | 135,424.44 | 114,259.62 | 127,826.75 | 129,739.70 | 120,575.17 | 112,441.80 | 118,497.42 |
| Surgery                        | 124,855.50 | 120,762.86 | 108,737.04 | 119,692.33 | 126,591.56 | 132,630.34 | 145,903.03 | 157,335.55 | 149,994.06 | 124,600.35 |
| Urology                        | 105,822.00 | 103,921.18 | 102,049.98 | 130,065.58 | 137,244.16 | 137,675.96 | 128,527.40 | 124,770.27 | 122,113.52 | 124,822.78 |
| <b>K08</b>                     |            |            |            |            |            |            |            |            |            |            |
| Anesthesiology                 | 125,868.50 | 128,416.50 | 133,159.39 | 143,492.28 | 152,550.32 | 159,119.06 | 151,658.85 | 160,835.29 | 157,795.44 | 149,201.89 |
| Dermatology                    | 123,634.20 | 119,317.51 | 109,927.81 | 102,456.87 | 112,335.80 | 149,539.43 | 127,492.55 | 145,874.29 | 125,787.21 | 140,414.60 |
| Emergency Medicine             | 141,586.00 | 139,463.23 | 120,582.68 | 140,184.25 | 139,465.34 | 144,618.95 | 147,890.79 | 142,995.52 | 138,926.44 | 138,042.33 |
| Family Medicine                | 122,205.80 | 120,970.95 | 130,721.14 | 130,239.65 | 138,606.69 | 135,272.54 | 153,165.18 | 149,676.86 | 149,873.95 | 144,803.25 |
| Internal Medicine/ Medicine    | 135,478.30 | 132,196.42 | 132,061.10 | 134,971.28 | 131,365.86 | 143,109.16 | 148,378.04 | 147,625.63 | 144,902.20 | 148,273.02 |
| Neurology                      | 162,383.80 | 157,712.95 | 162,888.25 | 165,970.51 | 146,706.44 | 152,241.75 | 167,097.87 | 168,960.69 | 162,860.83 | 163,377.21 |
| Neurosurgery                   | 165,681.90 | 167,867.81 | 154,935.00 | 155,821.28 | 140,951.42 | 144,351.32 | 144,670.04 | 162,632.68 | 159,275.29 | 155,622.51 |
| Obstetrics and Gynecology      | 134,050.10 | 132,160.77 | 131,198.30 | 113,207.69 | 113,998.57 | 115,559.46 | 152,107.91 | 161,625.86 | 161,597.63 | 160,438.26 |
| Ophthalmology                  | 204,350.20 | 207,180.86 | 177,453.73 | 201,423.04 | 190,526.09 | 180,056.21 | 185,725.63 | 174,189.34 | 176,598.91 | 168,199.60 |
| Orthopedics                    | 179,280.00 | 131,949.24 | 125,147.80 | 103,548.51 | 113,408.83 | 161,557.27 | 156,354.94 | 131,238.11 | 105,693.88 | 121,903.40 |
| Otolaryngology                 | 166,228.00 | 153,552.79 | 170,525.96 | 173,451.62 | 176,569.45 | 174,524.21 | 170,544.46 | 172,203.30 | 157,723.02 | 162,071.07 |
| Pathology                      | 127,919.40 | 127,555.55 | 122,472.03 | 139,303.30 | 133,412.03 | 151,862.14 | 138,640.16 | 148,913.91 | 152,702.09 | 150,159.38 |
| Pediatrics                     | 131,701.80 | 135,236.58 | 134,387.48 | 136,102.75 | 133,121.89 | 136,804.50 | 147,383.02 | 148,812.28 | 149,953.44 | 148,484.85 |
| Physical Medicine & Rehab      | 124,929.00 | 122,683.81 | 120,474.77 | -          | -          | -          | -          | 152,380.97 | 149,422.30 | 148,046.88 |
| Plastic Surgery                | -          | -          | -          | -          | -          | -          | -          | -          | -          | -          |
| Psychiatry                     | 167,165.70 | 159,100.07 | 150,932.38 | 152,099.55 | 157,498.60 | 157,107.03 | 155,465.92 | 143,195.04 | 149,706.13 | 153,061.09 |
| Radiation-Diagnostic/ Oncology | 162,287.60 | 161,047.92 | 158,148.10 | 144,259.80 | 129,666.89 | 159,300.23 | 161,730.23 | 181,155.52 | 180,187.95 | 179,949.21 |
| Surgery                        | 133,971.00 | 138,597.38 | 128,653.97 | 135,166.64 | 133,417.74 | -          | 148,242.33 | 148,435.61 | 148,585.58 | 149,450.36 |
| Urology                        | 152,105.50 | 146,981.94 | 121,925.34 | 143,306.00 | 154,772.53 | 152,968.67 | 153,737.93 | 147,866.65 | 194,135.52 | 189,335.68 |
| <b>K23</b>                     |            |            |            |            |            |            |            |            |            |            |
| Anesthesiology                 | 133,340.70 | 153,030.05 | 136,406.44 | 148,123.81 | 144,443.08 | 142,689.21 | 157,555.12 | 159,846.55 | 157,905.60 | 150,983.07 |
| Dermatology                    | 122,563.30 | 120,470.81 | 81,000.55  | 116,374.47 | 80,169.46  | 155,064.66 | 158,091.68 | 135,011.74 | 136,025.10 | 144,337.17 |
| Emergency Medicine             | 130,236.80 | 138,218.22 | 148,593.07 | 145,808.38 | 138,023.31 | 151,985.43 | 162,035.47 | 156,231.37 | 156,330.87 | 148,889.11 |
| Family Medicine                | 154,195.60 | 154,135.32 | 144,757.48 | 138,631.04 | 100,981.12 | 135,667.55 | 147,222.61 | 142,664.37 | 143,412.91 | 135,537.73 |
| Internal Medicine/ Medicine    | 145,051.40 | 143,956.41 | 143,924.58 | 140,400.99 | 137,548.15 | 153,626.58 | 159,586.71 | 158,975.82 | 157,710.53 | 151,433.71 |
| Neurology                      | 147,474.40 | 149,145.44 | 156,272.35 | 158,596.97 | 155,263.02 | 151,669.37 | 166,412.01 | 157,056.23 | 155,155.64 | 159,323.08 |
| Neurosurgery                   | 185,974.00 | 174,788.46 | 177,890.38 | 164,338.59 | 157,069.93 | 134,928.19 | 167,310.69 | 163,676.56 | 161,977.81 | 161,311.35 |
| Obstetrics and Gynecology      | 133,524.90 | 126,706.10 | 121,630.15 | 114,511.43 | 108,485.52 | 120,231.04 | 148,887.44 | 150,578.68 | 151,480.64 | 146,117.58 |
| Ophthalmology                  | 190,213.70 | 209,524.57 | 196,121.24 | 192,491.56 | 193,737.24 | 188,760.85 | 198,016.91 | 172,151.37 | 187,749.44 | 182,515.28 |
| Orthopedics                    | 168,728.00 | 127,903.29 | 102,932.35 | 100,281.36 | 90,965.11  | 160,765.03 | 157,890.07 | 109,642.35 | 143,752.13 | 118,040.75 |
| Otolaryngology                 | 185,635.10 | 204,843.04 | 198,460.46 | 199,881.18 | 202,573.86 | 180,798.34 | 184,810.00 | 180,423.82 | 167,203.07 | 131,001.92 |
| Pathology                      | 129,132.00 | 131,033.31 | 127,655.29 | 127,762.92 | 129,617.97 | 127,076.54 | 133,079.84 | 126,822.03 | 166,050.99 | 151,661.84 |
| Pediatrics                     | 137,762.10 | 134,557.71 | 133,286.30 | 128,747.84 | 129,930.85 | 146,325.32 | 159,585.62 | 156,852.71 | 152,273.25 | 148,925.32 |
| Physical Medicine & Rehab      | 142,022.90 | 154,311.50 | 145,726.94 | 129,158.14 | 135,613.19 | 114,208.49 | 150,712.78 | 120,312.95 | 132,265.10 | 127,114.35 |
| Plastic Surgery                | -          | -          | -          | -          | -          | -          | -          | -          | -          | -          |
| Psychiatry                     | 160,234.10 | 152,786.21 | 156,158.56 | 153,997.22 | 146,351.94 | 152,801.23 | 161,590.69 | 154,874.24 | 153,663.73 | 149,861.34 |
| Radiation-Diagnostic/ Oncology | 158,602.70 | 161,810.96 | 152,274.85 | 153,833.18 | 151,190.88 | 161,046.12 | 164,639.72 | 160,041.70 | 170,957.04 | 166,047.27 |
| Surgery                        | 131,087.50 | 136,724.65 | 129,694.30 | 135,176.38 | 137,446.57 | 179,925.96 | 163,030.76 | 163,112.85 | 151,072.16 | 148,931.26 |
| Urology                        | 157,160.00 | 151,176.38 | 143,171.13 | 146,765.39 | 140,859.48 | 134,846.46 | 142,194.67 | 128,536.59 | 147,163.21 | 144,664.44 |

Supplementary Table 15: Mean NIH advanced career grant (R01, R03, R21,P30, U01) funding amount from 2011-2020 by specialty

|                             | 2011       | 2012       | 2013       | 2014       | 2015       | 2016       | 2017       | 2018       | 2019       | 2020       |
|-----------------------------|------------|------------|------------|------------|------------|------------|------------|------------|------------|------------|
| <b>R01</b>                  |            |            |            |            |            |            |            |            |            |            |
| Anesthesiology              | 374,447.70 | 394,100.80 | 381,465.50 | 388,318.40 | 397,822.70 | 406,701.40 | 407,569.50 | 421,265.70 | 442,363.80 | 457,545.10 |
| Dermatology                 | 346,269.00 | 353,875.30 | 329,760.60 | 339,497.10 | 343,133.50 | 378,646.10 | 376,141.70 | 401,937.20 | 407,364.50 | 451,637.40 |
| Emergency Medicine          | 466,096.40 | 430,106.60 | 460,062.20 | 470,284.20 | 426,357.60 | 487,572.10 | 508,476.20 | 493,767.40 | 575,232.50 | 549,043.00 |
| Family Medicine             | 487,546.90 | 488,225.60 | 486,072.70 | 495,950.50 | 506,253.30 | 545,224.90 | 554,983.50 | 600,927.30 | 516,841.30 | 531,260.10 |
| Internal Medicine/ Medicine | 397,304.00 | 402,009.00 | 394,328.30 | 418,406.80 | 425,024.90 | 444,284.30 | 460,866.00 | 476,968.20 | 496,173.70 | 519,120.80 |
| Neurology                   | 410,236.30 | 402,897.10 | 396,817.20 | 416,205.80 | 415,876.30 | 454,982.50 | 501,719.70 | 527,246.30 | 523,779.60 | 591,815.60 |
| Neurosurgery                | 349,190.00 | 361,219.40 | 334,960.60 | 363,622.60 | 380,344.00 | 392,876.40 | 396,933.90 | 405,769.40 | 419,080.50 | 439,343.10 |
| Obstetrics and Gynecology   | 346,000.80 | 353,612.00 | 344,703.60 | 366,529.30 | 395,003.60 | 414,115.00 | 426,231.40 | 462,369.60 | 470,195.60 | 498,958.80 |
| Ophthalmology               | 422,226.60 | 405,362.00 | 408,734.00 | 420,905.30 | 413,073.10 | 423,610.60 | 413,586.50 | 415,660.80 | 427,374.40 | 424,900.50 |
| Orthopedics                 | 339,055.70 | 342,596.00 | 328,792.10 | 358,600.80 | 347,868.40 | 359,813.70 | 376,507.60 | 393,633.10 | 400,186.80 | 394,073.30 |
| Otolaryngology              | 366,140.90 | 374,585.90 | 354,134.70 | 370,305.90 | 386,724.90 | 405,442.80 | 444,403.50 | 441,687.90 | 468,107.80 | 484,753.40 |
| Pathology                   | 349,328.10 |            |            |            |            |            |            |            |            |            |

|                         | 2011         | 2012         | 2013         | 2014         | 2015         | 2016         | 2017         | 2018         | 2019         | 2020         |
|-------------------------|--------------|--------------|--------------|--------------|--------------|--------------|--------------|--------------|--------------|--------------|
| Anesthesiology          | 75,013.50    | 80,121.33    | 73,827.00    | 88,809.17    | 80,643.50    | 77,053.25    | 64,444.67    | 84,861.11    | 99,035.62    | 125,495.20   |
| Dermatology             | 65,179.20    | 69,331.67    | 75,557.50    | 79,536.50    | 78,739.62    | 78,298.56    | 76,541.71    | 77,562.50    | 97,484.25    | 103,084.00   |
| Emergency Medicine      | 63,900.00    | 86,342.00    | 68,643.00    | 114,000.00   | 103,827.20   | 103,827.20   | 90,322.40    | 87,723.75    | 97,375.00    | 86,329.25    |
| Family Medicine         | 92,104.25    | 79,953.11    | 93,963.44    | 72,566.71    | 71,569.67    | 81,500.40    | 77,791.50    | 89,625.00    | 110,513.00   | 137,648.00   |
| Internal Medicine/ Med  | 80,464.41    | 83,149.58    | 81,058.10    | 86,721.70    | 88,129.27    | 87,862.07    | 86,184.46    | 83,945.14    | 95,116.11    | 107,653.00   |
| Neurology               | 96,460.50    | 72,986.11    | 77,806.82    | 87,614.08    | 96,734.08    | 105,522.80   | 92,073.53    | 79,031.53    | 102,401.90   | 112,459.50   |
| Neurosurgery            | 130,434.70   | 97,590.25    | 95,985.62    | 77,379.40    | 84,825.57    | 89,403.75    | 80,900.00    | 80,539.50    | 80,125.00    | 94,243.00    |
| Obstetrics and Gynecol  | 75,107.75    | 72,019.92    | 76,442.40    | 66,966.33    | 74,648.30    | 91,245.82    | 88,747.40    | 81,769.53    | 80,324.57    | 76,466.70    |
| Ophthalmology           | -            | -            | -            | 97,812.50    | 90,412.67    | 81,000.00    | 117,750.00   | 97,000.00    | 107,491.00   | 109,985.70   |
| Orthopedics             | 81,667.80    | 78,736.50    | 73,071.33    | 84,992.50    | 81,801.70    | 71,470.57    | 77,298.33    | 119,874.70   | 105,583.60   | 90,420.00    |
| Otolaryngology          | 132,187.70   | 126,241.40   | 125,250.60   | 131,234.80   | 134,709.60   | 140,382.80   | 149,760.80   | 131,110.40   | 160,218.00   | 158,270.30   |
| Pathology               | 77,017.92    | 68,969.52    | 68,464.14    | 72,582.80    | 82,741.27    | 81,826.56    | 86,125.00    | 85,686.81    | 93,440.08    | 108,855.80   |
| Pediatrics              | 76,878.26    | 83,228.93    | 77,130.46    | 76,619.09    | 88,884.12    | 93,250.40    | 88,673.74    | 92,985.63    | 84,607.97    | 105,865.80   |
| Physical Medicine & Re  | 96,047.43    | 77,752.57    | 92,279.40    | 85,749.29    | 82,524.80    | 79,055.80    | 57,416.33    | 122,787.50   | 119,870.90   | 90,743.00    |
| Plastic Surgery         | -            | -            | -            | -            | -            | 77,000.00    | 77,625.00    | -            | -            | -            |
| Psychiatry              | 106,102.80   | 96,842.21    | 88,253.77    | 108,346.70   | 105,996.80   | 97,768.48    | 91,020.66    | 92,001.78    | 94,258.75    | 112,458.60   |
| Radiation-Diagnostic/O  | 97,959.88    | 74,000.00    | 74,273.10    | 81,043.88    | 73,541.19    | 80,722.22    | 84,385.64    | 87,718.83    | 101,238.20   | 96,695.82    |
| Surgery                 | 90,946.47    | 86,952.30    | 81,038.65    | 92,010.12    | 79,187.47    | 85,131.93    | 84,614.60    | 85,822.24    | 93,100.45    | 108,786.10   |
| Urology                 | 78,000.00    | 80,206.67    | 76,727.50    | 88,901.00    | 94,229.60    | 99,951.67    | 81,000.00    | 84,750.00    | 95,083.67    | 95,640.25    |
| <b>R21</b>              | <b>2011</b>  | <b>2012</b>  | <b>2013</b>  | <b>2014</b>  | <b>2015</b>  | <b>2016</b>  | <b>2017</b>  | <b>2018</b>  | <b>2019</b>  | <b>2020</b>  |
| Anesthesiology          | 198,626.80   | 206,645.70   | 207,925.40   | 240,374.70   | 214,890.20   | 222,642.60   | 204,033.30   | 205,608.50   | 231,893.00   | 220,026.40   |
| Dermatology             | 183,150.90   | 215,467.50   | 205,891.90   | 187,726.20   | 175,905.80   | 206,179.00   | 206,712.70   | 200,869.70   | 211,443.40   | 215,252.90   |
| Emergency Medicine      | 236,297.20   | 247,628.80   | 225,641.70   | 226,948.40   | 176,774.30   | 171,878.60   | 150,868.10   | 170,914.20   | 266,771.70   | 245,092.00   |
| Family Medicine         | 195,393.30   | 208,657.20   | 185,239.90   | 195,614.40   | 194,681.40   | 175,792.70   | 173,967.60   | 205,190.60   | 171,800.00   | 204,367.60   |
| Internal Medicine/ Medi | 206,711.70   | 201,968.50   | 194,621.30   | 201,298.10   | 195,991.70   | 202,211.70   | 204,170.20   | 203,708.00   | 205,422.00   | 220,545.90   |
| Neurology               | 201,619.80   | 201,549.90   | 201,204.50   | 203,806.60   | 211,268.70   | 214,279.00   | 212,947.40   | 209,448.60   | 241,177.10   | 287,778.60   |
| Neurosurgery            | 185,724.80   | 206,732.60   | 201,600.70   | 230,048.00   | 208,243.30   | 219,118.90   | 211,809.70   | 214,277.20   | 286,452.30   | 306,622.90   |
| Obstetrics and Gynecol  | 206,047.70   | 188,485.70   | 212,358.60   | 195,606.80   | 218,635.10   | 197,080.80   | 211,848.40   | 205,317.70   | 190,272.70   | 230,260.90   |
| Ophthalmology           | 184,974.60   | 203,152.80   | 195,418.10   | 194,578.50   | 223,106.90   | 195,940.80   | 205,887.20   | 210,155.00   | 224,989.80   | 215,666.20   |
| Orthopedics             | 197,322.00   | 180,957.80   | 178,617.30   | 179,097.70   | 179,869.40   | 182,221.90   | 198,079.80   | 196,486.30   | 186,053.10   | 189,359.10   |
| Otolaryngology          | 190,945.80   | 202,619.80   | 219,600.80   | 180,714.10   | 194,943.90   | 209,649.70   | 198,219.80   | 168,791.10   | 186,598.10   | 207,036.90   |
| Pathology               | 195,703.40   | 204,958.00   | 200,512.00   | 206,034.70   | 206,334.40   | 199,877.40   | 204,935.70   | 208,193.80   | 212,859.80   | 238,281.30   |
| Pediatrics              | 191,759.30   | 204,481.70   | 194,309.80   | 204,612.00   | 204,628.20   | 203,089.60   | 203,995.10   | 209,293.80   | 215,602.60   | 229,768.60   |
| Physical Medicine & Re  | 195,226.20   | 204,276.70   | 198,593.80   | 184,909.80   | 175,084.50   | 219,859.90   | 213,217.90   | 210,636.60   | 218,363.20   | 272,956.00   |
| Plastic Surgery         | -            | -            | -            | -            | -            | -            | -            | -            | -            | -            |
| Psychiatry              | 206,745.70   | 210,005.50   | 200,307.60   | 203,195.30   | 203,961.00   | 206,254.10   | 207,092.30   | 208,095.90   | 216,318.70   | 248,406.50   |
| Radiation-Diagnostic/O  | 210,700.90   | 215,624.70   | 198,734.30   | 206,031.30   | 210,710.10   | 203,560.50   | 197,694.80   | 202,985.80   | 212,349.50   | 246,125.20   |
| Surgery                 | 192,224.20   | 197,450.10   | 194,389.40   | 213,268.20   | 206,825.20   | 196,633.60   | 198,945.20   | 196,267.10   | 202,344.50   | 230,940.30   |
| Urology                 | 203,200.80   | 192,179.90   | 167,621.00   | 184,901.50   | 180,240.60   | 189,491.20   | 195,661.90   | 197,886.00   | 189,822.10   | 224,701.10   |
| <b>P30</b>              | <b>2011</b>  | <b>2012</b>  | <b>2013</b>  | <b>2014</b>  | <b>2015</b>  | <b>2016</b>  | <b>2017</b>  | <b>2018</b>  | <b>2019</b>  | <b>2020</b>  |
| Anesthesiology          | -            | -            | -            | 999,665.00   | -            | -            | -            | -            | -            | -            |
| Dermatology             | 508,803.50   | 541,894.10   | 757,022.80   | 626,258.90   | 809,839.80   | 619,243.90   | 595,169.40   | 658,403.00   | 775,427.80   | 777,173.80   |
| Emergency Medicine      | -            | -            | -            | -            | -            | -            | -            | -            | -            | -            |
| Family Medicine         | -            | 119,990.50   | 118,347.00   | 118,786.20   | 118,793.20   | 118,769.50   | 1,499,404.00 | 1,631,702.00 | 506,108.00   | 579,330.50   |
| Internal Medicine/ Medi | 1,322,479.00 | 1,476,749.00 | 1,647,969.00 | 1,595,381.00 | 1,386,675.00 | 1,343,980.00 | 1,410,555.00 | 1,289,653.00 | 1,454,688.00 | 1,360,467.00 |
| Neurology               | 909,600.70   | 792,808.50   | 874,868.00   | 926,021.70   | 955,091.90   | 972,888.10   | 913,550.00   | 924,625.30   | 1,004,999.00 | 1,531,679.00 |
| Neurosurgery            | 945,027.00   | 883,790.30   | 833,661.70   | 894,494.50   | 874,301.50   | 638,089.00   | 625,169.00   | 612,461.00   | 349,065.00   | -            |
| Obstetrics and Gynecol  | 1,933,778.00 | 1,933,777.00 | 2,578,935.00 | 1,793,093.00 | 1,157,198.00 | 960,318.00   | -            | 825,564.00   | 484,487.50   | 517,036.80   |
| Ophthalmology           | 604,815.60   | 584,035.50   | 587,455.10   | 595,992.60   | 595,040.80   | 627,412.80   | 628,117.10   | 566,308.50   | 676,475.90   | 662,129.10   |
| Orthopedics             | 625,387.50   | 627,439.20   | 597,681.80   | 614,321.00   | 611,879.20   | 703,440.00   | 696,916.40   | 691,739.60   | 755,061.70   | 751,669.50   |
| Otolaryngology          | 622,200.80   | 604,010.00   | 657,359.40   | 556,833.40   | 499,296.20   | 458,450.40   | 614,973.00   | 1,831,543.00 | 5,129,654.00 | 1,280,229.00 |
| Pathology               | 1,470,235.00 | 957,377.10   | 1,815,262.00 | 1,575,747.00 | 1,348,339.00 | 1,711,069.00 | 1,424,948.00 | 704,481.40   | 989,077.50   | 1,091,643.00 |
| Pediatrics              | 1,546,389.00 | 1,105,870.00 | 967,114.30   | 948,261.30   | 943,137.20   | 828,083.70   | 898,125.40   | 911,258.60   | 834,352.40   | 686,218.80   |
| Physical Medicine & Re  | -            | -            | -            | -            | -            | -            | -            | -            | -            | -            |
| Plastic Surgery         | -            | -            | -            | -            | -            | -            | -            | -            | -            | -            |
| Psychiatry              | 1,359,067.00 | 1,143,958.00 | 1,148,220.00 | 1,078,633.00 | 964,003.10   | 1,121,970.00 | 1,060,552.00 | 1,061,952.00 | 791,983.70   | 1,084,308.00 |
| Radiation-Diagnostic/O  | 570,185.40   | 631,016.30   | 858,373.40   | 847,082.90   | 1,477,880.00 | 973,777.90   | 887,744.60   | 862,805.50   | 942,347.40   | 1,172,460.00 |
| Surgery                 | 1,941,337.00 | 1,953,115.00 | 1,619,891.00 | 1,331,107.00 | 1,580,976.00 | 1,334,913.00 | 1,881,459.00 | 1,268,240.00 | 1,355,662.00 | 1,473,755.00 |
| Urology                 | 690,688.70   | 787,747.80   | 788,214.80   | 883,989.70   | 890,415.50   | 703,540.90   | -            | -            | -            | -            |
| <b>U01</b>              | <b>2011</b>  | <b>2012</b>  | <b>2013</b>  | <b>2014</b>  | <b>2015</b>  | <b>2016</b>  | <b>2017</b>  | <b>2018</b>  | <b>2019</b>  | <b>2020</b>  |
| Anesthesiology          | 471,964.90   | 451,071.30   | 502,329.90   | 581,282.50   | 659,561.00   | 805,747.30   | 646,645.70   | 558,255.40   | 952,199.00   | 788,965.70   |
| Dermatology             | 269,879.00   | 501,225.00   | 351,136.30   | 373,138.20   | 510,195.50   | 549,849.80   | 636,470.60   | 593,721.30   | 908,451.60   | 478,907.70   |
| Emergency Medicine      | 1,824,301.00 | 1,298,730.00 | 482,628.40   | 501,535.70   | 551,203.10   | 661,067.80   | 1,613,430.00 | 3,157,825.00 | 657,901.70   | 2,040,631.00 |
| Family Medicine         | 478,966.10   | 586,568.00   | 742,643.20   | 893,927.70   | 788,654.90   | 643,250.80   | 481,880.50   | 589,515.60   | 664,795.80   | 808,722.80   |
| Internal Medicine/ Medi | 1,022,969.00 | 964,165.60   | 989,827.10   | 1,092,75.00  | 886,928.90   | 858,966.50   | 893,301.00   | 856,548.70   | 1,092,779.00 | 1,185,112.00 |
| Neurology               | 1,871,063.00 | 1,720,465.00 | 1,787,908.00 | 1,467,034.00 | 1,155,044.00 | 1,126,302.00 | 1,158,458.00 | 1,597,367.00 | 1,513,014.00 | 1,832,220.00 |
| Neurosurgery            | 768,340.80   | 1,148,616.00 | 1,956,889.00 | 2,148,264.00 | 880,115.20   | 544,229.30   | 1,090,613.00 | 661,140.50   | 684,117.00   | 699,007.20   |
| Obstetrics and Gynecol  | 1,693,429.00 | 1,003,004.00 | 651,969.90   | 846,932.70   | 2,061,479.00 | 749,891.80   | 549,367.70   | 1,023,898.00 | 893,043.90   | 769,562.20   |
| Ophthalmology           | 586,612.20   | 530,067.90   | 387,425.60   | 271,115.80   | 593,446.80   | 745,473.40   | 645,930.80   | 615,781.70   | 567,401.30   | 992,640.80   |
| Orthopedics             | -            | -            | 521,639.00   | 328,701.30   | 196,680.00   | 196,680.00   | -            | -            | 705,076.00   | 648,412.00   |
| Otolaryngology          | 353,177.20   | 207,493.50   | 380,567.70   | 262,256.00   | 870,422.00   | 799,632.30   | 725,323.20   | 805,466.80   | 537,763.50   | 777,554.20   |
| Pathology               | 838,184.80   | 549,637.20   | 591,787.10   | 595,558.00   | 677,260.50   | 776,469.70   | 845,671.50   | 929,243.10   | 787,017.40   | 869,787.10   |
| Pediatrics              | 754,255.50   | 776,144.10   | 785,361.80   | 842,353.10   | 758,205.00   | 825,554.30   | 779,608.50   | 799,393.60   | 745,582.70   | 671,752.30   |
| Physical Medicine & Re  | 142,161.00   | 207,461.00   | 542,662.10   | 497,752.60   | 486,371.40   | 724,539.40   | 714,931.60   | 323,280.20   | 1,693,692.00 | 2,602,043.00 |
| Plastic Surgery         | -            | -            | -            | -            | -            | -            | -            | 430,375.00   | 430,374.00   | 430,375.00   |
| Psychiatry              | 783,933.80   | 675,010.60   | 676,836.10   | 716,949.10   | 647,915.90   | 715,427.10   | 684,931.10   | 666,083.20   | 1,007,650.00 | 999,233.70   |
| Radiation-Diagnostic/O  | 473,532.00   | 477,637.40   | 630,609.80   | 659,958.20   | 575,229.00   | 597,857.80   | 877,838.40   | 693,746.60   | 707,158.00   | 783,193.20   |
| Surgery                 | 577,115.30   | 739,604.80   | 680,929.60   | 729,561.00   | 787,591.30   | 760,011.10   | 612,448.50   | 621,961.60   | 704,749.40   | 564,166.70   |
| Urology                 | 960,907.90   | 756,219.90   | 694,723.70   | 386,726.50   | 385,323.20   | 454,059.60   | 402,182.40   | 532,157.50   | 707,767.40   | 368,446.40   |

|                         |              |              |              |              |              |              |              |              |              |              |
|-------------------------|--------------|--------------|--------------|--------------|--------------|--------------|--------------|--------------|--------------|--------------|
| Psychiatry              | 465,597.40   | 455,643.14   | 433,159.11   | 443,499.29   | 456,044.31   | 473,322.91   | 479,528.20   | 489,512.50   | 494,041.18   | 504,989.96   |
| Radiation-Diagnostic/Or | 388,720.60   | 396,611.26   | 371,707.90   | 384,771.39   | 393,455.28   | 429,769.25   | 445,032.31   | 431,055.71   | 441,474.26   | 434,477.76   |
| Surgery                 | 355,171.00   | 353,022.56   | 333,002.72   | 354,571.76   | 371,085.36   | 384,810.07   | 386,724.04   | 382,141.29   | 393,729.19   | 404,476.28   |
| Urology                 | 307,852.70   | 320,142.49   | 290,710.27   | 289,331.59   | 322,216.70   | 318,551.12   | 347,247.05   | 358,473.27   | 360,130.77   | 364,194.12   |
| <b>R03</b>              |              |              |              |              |              |              |              |              |              |              |
| Anesthesiology          | 75,013.50    | 78,681.41    | 71,194.77    | 84,017.17    | 75,429.88    | 71,480.32    | 58,737.26    | 75,584.03    | 86,516.01    | 108,194.58   |
| Dermatology             | 65,179.20    | 68,085.66    | 72,863.57    | 75,244.84    | 73,649.09    | 72,635.56    | 69,762.95    | 69,083.31    | 85,160.75    | 88,872.96    |
| Emergency Medicine      | 63,905.00    | 84,790.28    | 66,195.60    | 107,848.74   | 97,114.76    | 96,360.13    | 82,323.19    | 78,133.72    | 85,065.31    | 74,428.00    |
| Family Medicine         | 92,104.25    | 78,516.21    | 90,613.26    | 68,651.13    | 66,942.68    | 75,605.83    | 70,902.06    | 79,827.13    | 96,542.47    | 118,672.01   |
| Internal Medicine/ Med  | 80,464.41    | 81,565.24    | 78,168.05    | 82,042.34    | 82,431.70    | 81,507.39    | 78,551.71    | 74,768.19    | 83,091.98    | 92,812.51    |
| Neurology               | 96,460.50    | 71,674.42    | 75,032.69    | 82,886.56    | 90,480.21    | 97,890.79    | 83,919.23    | 70,391.74    | 89,456.74    | 96,955.96    |
| Neurosurgery            | 130,434.70   | 95,836.38    | 92,563.34    | 73,204.13    | 79,341.58    | 82,937.56    | 73,735.26    | 71,734.86    | 69,995.98    | 81,250.77    |
| Obstetrics and Gynecolo | 75,107.75    | 70,725.60    | 73,716.92    | 63,352.93    | 69,822.28    | 84,646.40    | 80,887.67    | 72,830.42    | 70,170.32    | 65,925.09    |
| Ophthalmology           | -            | -            | -            | 92,534.69    | 84,567.48    | 75,141.62    | 107,321.72   | 86,395.89    | 93,902.50    | 94,823.20    |
| Orthopedics             | 81,667.80    | 77,321.47    | 70,466.04    | 80,406.44    | 76,513.21    | 66,301.41    | 70,452.57    | 106,769.91   | 92,236.22    | 77,954.80    |
| Otolaryngology          | 132,187.70   | 123,972.62   | 120,784.90   | 124,153.58   | 126,000.60   | 130,229.52   | 136,497.55   | 116,777.31   | 139,964.00   | 136,451.34   |
| Pathology               | 77,017.92    | 67,730.02    | 66,023.11    | 68,666.35    | 77,392.03    | 75,908.40    | 78,497.52    | 76,319.46    | 81,627.83    | 93,849.07    |
| Pediatrics              | 76,878.26    | 81,733.16    | 74,380.44    | 72,484.85    | 83,137.75    | 86,506.00    | 80,820.54    | 82,820.37    | 73,912.23    | 91,271.26    |
| Physical Medicine & Reh | 96,047.43    | 76,355.22    | 88,989.26    | 81,122.40    | 77,189.56    | 73,338.04    | 52,331.37    | 109,364.28   | 104,717.39   | 78,233.28    |
| Plastic Surgery         | -            | -            | -            | -            | -            | 71,430.92    | 70,750.30    | -            | -            | -            |
| Psychiatry              | 106,102.80   | 95,101.79    | 85,107.16    | 102,500.49   | 99,144.09    | 90,697.31    | 82,959.61    | 81,944.08    | 82,343.01    | 96,955.19    |
| Radiation-Diagnostic/Or | 97,959.88    | 72,670.09    | 71,624.96    | 76,670.88    | 68,786.74    | 74,883.93    | 76,912.20    | 78,129.34    | 88,440.15    | 83,365.45    |
| Surgery                 | 90,946.47    | 85,389.62    | 78,149.29    | 87,045.40    | 74,067.99    | 78,974.71    | 77,120.89    | 76,440.09    | 81,331.13    | 93,788.97    |
| Urology                 | 78,000.00    | 78,765.22    | 73,991.85    | 84,104.04    | 88,137.64    | 92,722.60    | 73,826.41    | 75,485.07    | 83,063.64    | 82,455.40    |
| <b>R21</b>              |              |              |              |              |              |              |              |              |              |              |
| Anesthesiology          | 198,626.80   | 202,931.92   | 200,512.01   | 227,404.47   | 200,997.51   | 206,539.82   | 185,963.52   | 183,131.22   | 202,578.19   | 189,693.82   |
| Dermatology             | 183,150.90   | 211,595.17   | 198,551.01   | 177,596.79   | 164,533.46   | 159,266.96   | 188,405.62   | 178,910.47   | 184,713.73   | 185,578.38   |
| Emergency Medicine      | 236,297.20   | 243,178.48   | 217,596.65   | 214,702.63   | 165,345.81   | 159,447.36   | 137,506.78   | 152,229.73   | 233,047.69   | -            |
| Family Medicine         | 195,993.30   | 204,907.27   | 178,635.34   | 185,059.36   | 182,095.22   | 163,078.37   | 158,560.52   | 182,759.01   | 150,081.86   | 176,193.72   |
| Internal Medicine/ Med  | 206,711.70   | 198,338.77   | 187,682.25   | 190,436.38   | 183,320.81   | 187,586.60   | 186,088.30   | 181,438.49   | 179,453.53   | 190,141.70   |
| Neurology               | 201,619.80   | 197,927.70   | 194,030.74   | 192,809.52   | 197,610.15   | 198,781.13   | 194,088.16   | 186,551.52   | 210,688.64   | 248,105.78   |
| Neurosurgery            | 185,724.80   | 203,017.25   | 194,412.81   | 217,634.98   | 194,780.34   | 203,270.98   | 193,051.22   | 190,852.25   | 250,240.36   | 264,352.22   |
| Obstetrics and Gynecolo | 206,047.70   | 185,098.28   | 204,787.15   | 185,052.17   | 204,500.31   | 182,826.80   | 193,086.49   | 182,872.21   | 166,219.33   | 198,517.40   |
| Ophthalmology           | 184,974.60   | 199,501.79   | 188,450.64   | 184,079.36   | 208,683.00   | 181,769.25   | 187,653.23   | 187,180.69   | 196,547.66   | 185,934.71   |
| Orthopedics             | 197,322.00   | 177,705.67   | 172,248.86   | 169,433.87   | 168,240.81   | 169,042.58   | 180,537.28   | 175,006.27   | 162,533.15   | 163,254.27   |
| Otolaryngology          | 190,945.80   | 198,978.37   | 211,771.13   | 170,963.06   | 182,340.75   | 194,486.64   | 180,664.88   | 150,338.73   | 163,009.25   | 178,495.03   |
| Pathology               | 195,703.40   | 201,274.55   | 193,362.93   | 194,917.40   | 192,994.85   | 185,421.13   | 186,786.00   | 185,433.89   | 185,951.08   | 205,432.12   |
| Pediatrics              | 191,759.30   | 200,806.81   | 187,381.86   | 193,571.46   | 191,398.95   | 188,401.01   | 185,928.70   | 186,413.64   | 188,347.14   | 198,092.97   |
| Physical Medicine & Reh | 195,226.20   | 200,605.49   | 191,513.12   | 174,932.36   | 163,765.26   | 203,958.38   | 194,334.70   | 187,609.65   | 190,758.76   | 235,326.60   |
| Plastic Surgery         | -            | -            | -            | -            | -            | -            | -            | -            | -            | -            |
| Psychiatry              | 206,745.70   | 206,231.33   | 193,165.81   | 192,231.21   | 190,774.89   | 191,336.63   | 188,751.61   | 185,346.70   | 188,972.72   | 214,161.47   |
| Radiation-Diagnostic/Or | 210,700.90   | 211,749.55   | 191,648.61   | 194,914.18   | 197,087.66   | 188,837.85   | 180,186.28   | 180,795.24   | 185,505.28   | 212,194.66   |
| Surgery                 | 192,224.20   | 193,901.58   | 187,458.62   | 201,760.59   | 193,453.92   | 182,411.94   | 181,326.04   | 174,811.03   | 176,765.07   | 199,103.14   |
| Urology                 | 203,200.80   | 188,726.09   | 161,644.63   | 174,924.51   | 168,588.02   | 175,786.12   | 178,333.51   | 176,252.95   | 165,825.69   | 193,724.07   |
| <b>R30</b>              |              |              |              |              |              |              |              |              |              |              |
| Anesthesiology          | -            | -            | -            | 945,724.67   | -            | -            | -            | -            | -            | -            |
| Dermatology             | 508,803.50   | 532,155.32   | 730,031.84   | 592,466.97   | 757,483.53   | 574,456.67   | 542,459.47   | 586,425.88   | 677,401.90   | 670,033.52   |
| Emergency Medicine      | -            | -            | -            | -            | -            | -            | -            | -            | -            | -            |
| Family Medicine         | -            | 117,834.06   | 114,127.44   | 112,376.69   | 111,113.20   | 110,179.42   | 1,366,612.43 | 1,453,323.09 | 442,128.23   | 499,464.67   |
| Internal Medicine/ Med  | 1,322,479.00 | 1,450,209.24 | 1,589,212.16 | 1,509,296.79 | 1,297,026.24 | 1,246,775.74 | 1,285,632.16 | 1,148,667.15 | 1,270,793.25 | 1,172,914.59 |
| Neurology               | 909,600.70   | 778,560.35   | 843,675.37   | 876,065.05   | 893,345.06   | 902,523.31   | 832,643.36   | 823,544.55   | 877,951.80   | 1,320,523.51 |
| Neurosurgery            | 945,027.00   | 867,907.05   | 803,938.25   | 846,229.01   | 817,777.77   | 591,938.78   | 569,802.22   | 545,506.29   | 304,937.86   | -            |
| Obstetrics and Gynecolo | 1,933,778.00 | 1,899,023.65 | 2,486,985.41 | 1,696,340.57 | 1,082,384.97 | 890,862.35   | -            | 735,312.71   | 423,240.89   | 445,758.70   |
| Ophthalmology           | 604,815.60   | 573,539.36   | 566,509.92   | 563,833.79   | 556,571.32   | 582,034.74   | 572,489.23   | 504,399.22   | 590,959.03   | 570,848.75   |
| Orthopedics             | 625,387.50   | 616,163.02   | 576,372.00   | 581,173.22   | 572,321.11   | 652,563.23   | 635,195.46   | 616,118.10   | 660,396.61   | 648,045.21   |
| Otolaryngology          | 622,200.80   | 593,154.89   | 633,921.85   | 526,787.56   | 467,016.62   | 425,292.66   | 560,509.21   | 1,631,317.32 | 4,481,187.51 | 1,103,738.11 |
| Pathology               | 1,470,235.00 | 940,171.36   | 1,750,540.48 | 1,490,722.21 | 1,261,168.67 | 1,587,314.77 | 1,298,750.47 | 627,466.95   | 864,043.02   | 941,150.36   |
| Pediatrics              | 1,546,389.00 | 1,085,995.59 | 932,632.72   | 897,094.64   | 882,163.23   | 768,191.98   | 818,584.81   | 811,639.11   | 728,877.53   | 591,617.47   |
| Physical Medicine & Reh | -            | -            | -            | -            | -            | -            | -            | -            | -            | -            |
| Plastic Surgery         | -            | -            | -            | -            | -            | -            | -            | -            | -            | -            |
| Psychiatry              | 1,359,067.00 | 1,123,399.08 | 1,107,281.26 | 1,020,431.69 | 901,680.15   | 1,040,822.76 | 966,626.44   | 945,858.60   | 691,864.88   | 934,826.55   |
| Radiation-Diagnostic/Or | 570,185.40   | 619,675.84   | 827,768.87   | 801,375.66   | 1,382,334.82 | 903,348.75   | 809,123.36   | 768,482.94   | 823,220.32   | 1,010,826.02 |
| Surgery                 | 1,941,337.00 | 1,918,014.11 | 1,562,135.25 | 1,259,282.59 | 1,478,765.65 | 1,238,364.51 | 1,714,831.54 | 1,129,595.03 | 1,184,285.65 | 1,270,584.84 |
| Urology                 | 690,688.70   | 773,590.60   | 760,111.72   | 836,291.03   | 832,850.00   | 652,656.83   | -            | -            | -            | -            |
| <b>U01</b>              |              |              |              |              |              |              |              |              |              |              |
| Anesthesiology          | 471,964.90   | 442,964.76   | 484,419.78   | 549,917.43   | 616,920.28   | 747,471.08   | 589,376.88   | 497,226.49   | 831,826.52   | 680,199.80   |
| Dermatology             | 269,879.00   | 492,217.11   | 338,616.85   | 353,004.26   | 477,211.28   | 510,081.54   | 580,102.92   | 528,815.23   | 793,609.46   | 412,886.04   |
| Emergency Medicine      | 1,824,301.00 | 1,275,389.55 | 465,420.72   | 474,473.64   | 515,567.73   | 613,255.62   | 1,470,539.96 | 2,812,609.16 | 574,732.89   | 1,759,311.97 |
| Family Medicine         | 478,966.10   | 576,027.23   | 716,164.93   | 845,692.79   | 737,668.24   | 596,727.25   | 439,203.77   | 525,069.30   | 580,755.47   | 697,233.21   |
| Internal Medicine/ Med  | 1,022,969.00 | 946,837.86   | 954,535.71   | -            | 829,588.81   | 796,841.17   | 814,187.67   | 762,910.14   | 954,635.07   | 1,021,733.83 |
| Neurology               | 1,871,063.00 | 1,689,545.24 | 1,724,161.76 | 1,387,875.19 | 1,080,370.22 | 1,044,841.44 | 1,034,898.55 | 1,422,741.62 | 1,321,745.96 | 1,579,632.27 |
| Neurosurgery            | 768,340.80   | 1,127,973.37 | 1,887,117.89 | 2,032,347.11 | 823,215.61   | 885,214.02   | 994,025.15   | 588,864.11   | 597,634.18   | 602,642.88   |
| Obstetrics and Gynecolo | 1,693,429.00 | 984,978.27   | 628,724.50   | 801,233.56   | 1,928,204.06 | 695,655.37   | 500,714.10   | 911,964.69   | 780,149.53   | 663,471.25   |
| Ophthalmology           | 586,612.20   | 343,776.57   | 373,612.29   | 256,486.82   | 555,080.37   | 691,556.53   | 588,725.30   | 548,463.97   | 495,673.12   | 855,796.49   |
| Orthopedics             | -            | -            | 503,040.43   | 310,965.29   | 183,964.61   | 182,454.99   | -            | -            | 615,943.64   | 559,022.67   |
| Otolaryngology          | 353,177.20   | 203,764.48   | 366,998.90   | 248,105.09   | 814,149.08   | 741,798.35   | 661,086.47   | 717,412.55   | 469,781.99   | 670,361.48   |
| Pathology               | 838,184.80   | 539,759.26   | 570,687.47   | 563,422.64   | 633,475.50   | 720,311.00   | 770,776.38   | 827,657.53   | 687,526.40   | 749,879.26   |
| Pediatrics              | 754,255.50   | 762,195.44   | 757,360.44   | 796,901.07   | 709,186.93   | 765,845.53   | 710,564.11   | 712,003.28   | 651,329.68   | 579,145.31   |
| Physical Medicine & Reh | 142,161.00   | 203,732.56   | 523,313.97   | 470,894.67   | 454,927.41   | 672,136.60   | 651,615.18   | 287,938.96   | 1,479,583.50 | 2,243,328.36 |
| Plastic Surgery         | -            | -            | -            | -            | -            | -            | -            | 383,326.08   | 375,968.16   | 371,044.00   |
| Psychiatry              | 783,933.80   | 662,879.48   | 652,704.12   | 678,263.67   | 606,028.03   | 663,683.35   | 624,271.62   | 593,266.48   | 880,267.67   | 861,480.50   |
| Radiation-Diagnostic/Or | 473,532.00   | 469,053.42   | 608,125.98   | 624,347.91   | 538,040.35   | 554,617.33   | 800,094.49   | 617,905.69   | 617,7        |              |
