# Supplementary figures and images for: Does NIH funding differ between medical specialties? A longitudinal analysis of NIH grant data by specialty and type of grant, 2011–2020
Source: PubMed Central journal article supplement — BMJ Open. 2022 Dec 29;12(12):e058191. doi: 10.1136/bmjopen-2021-058191 (PMC9809243; doi:10.1136/bmjopen-2021-058191), 2022-12-29

Annual percent change in number of awarded grants (compared to 2011) by specialty

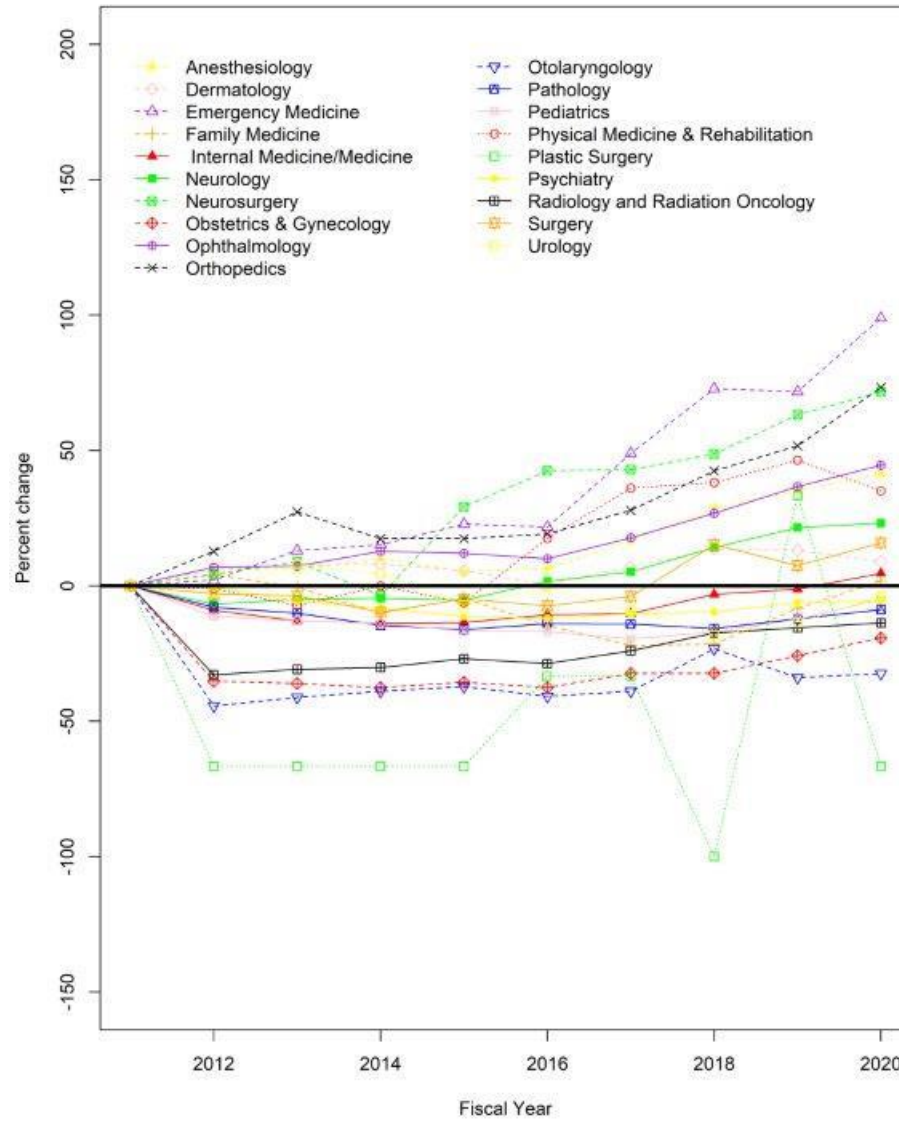

Supplement: bmjopen-2021-058191supp003.pdf [file bmjopen-2021-058191supp003.pdf]

F32 grant dollar amount comparisons P-values

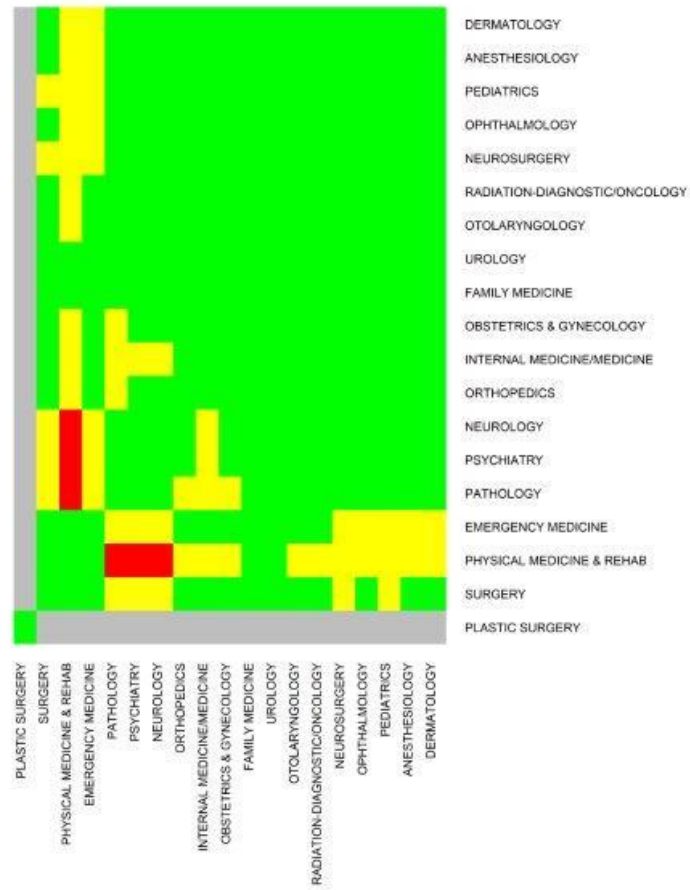

Supplement: bmjopen-2021-058191supp004.pdf [file bmjopen-2021-058191supp004.pdf]

T32 grant dollar amount comparisons P-values

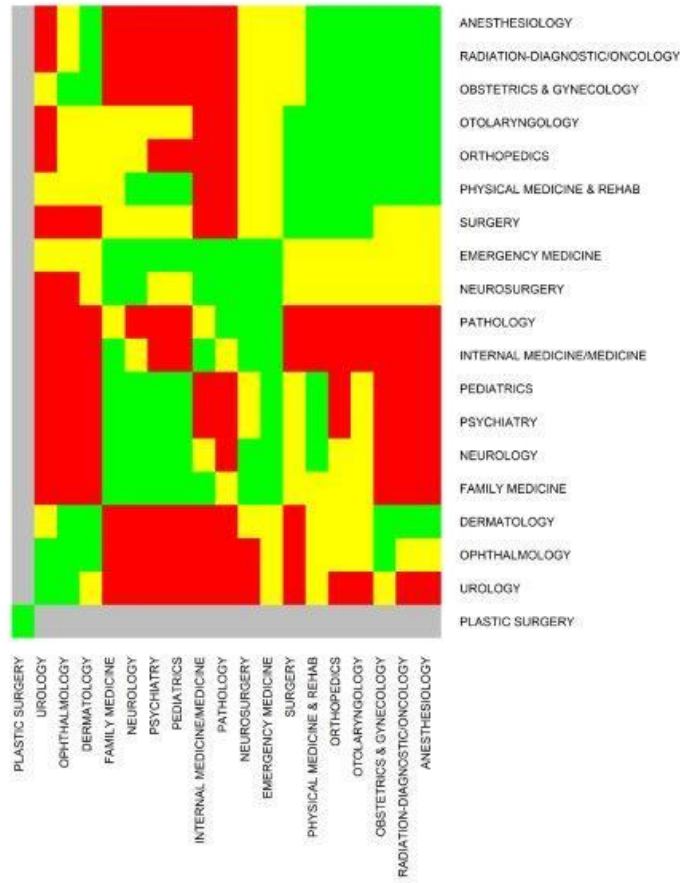

Supplement: bmjopen-2021-058191supp005.pdf [file bmjopen-2021-058191supp005.pdf]

**K01 grant dollar amount comparisons P-values**

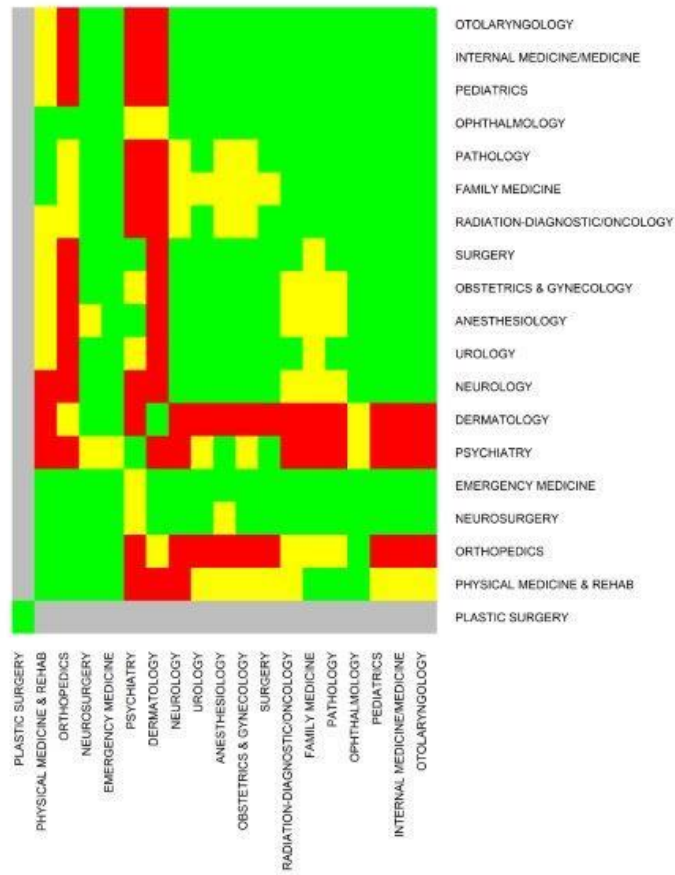

Supplement: bmjopen-2021-058191supp006.pdf [file bmjopen-2021-058191supp006.pdf]

**K08 grant dollar amount comparisons P-values**

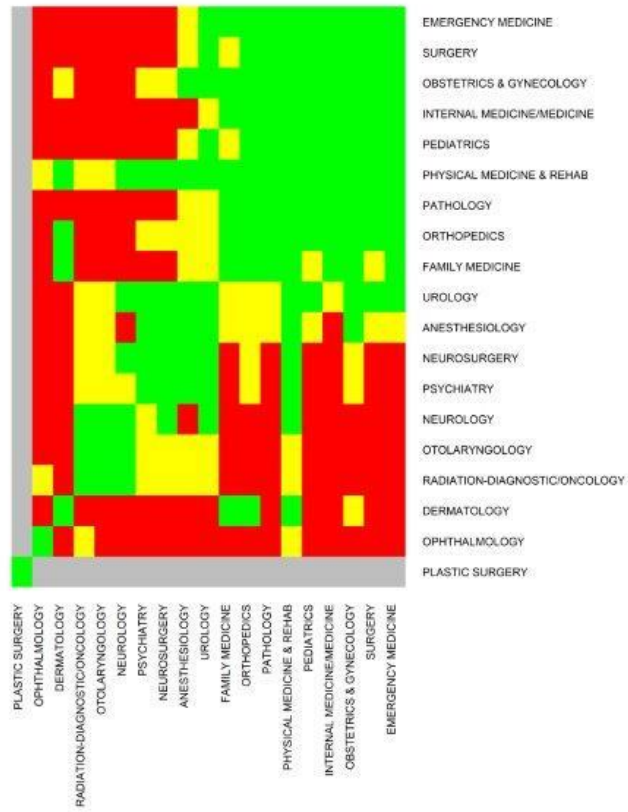

Supplement: bmjopen-2021-058191supp007.pdf [file bmjopen-2021-058191supp007.pdf]

**K23 grant dollar amount comparisons P-values**

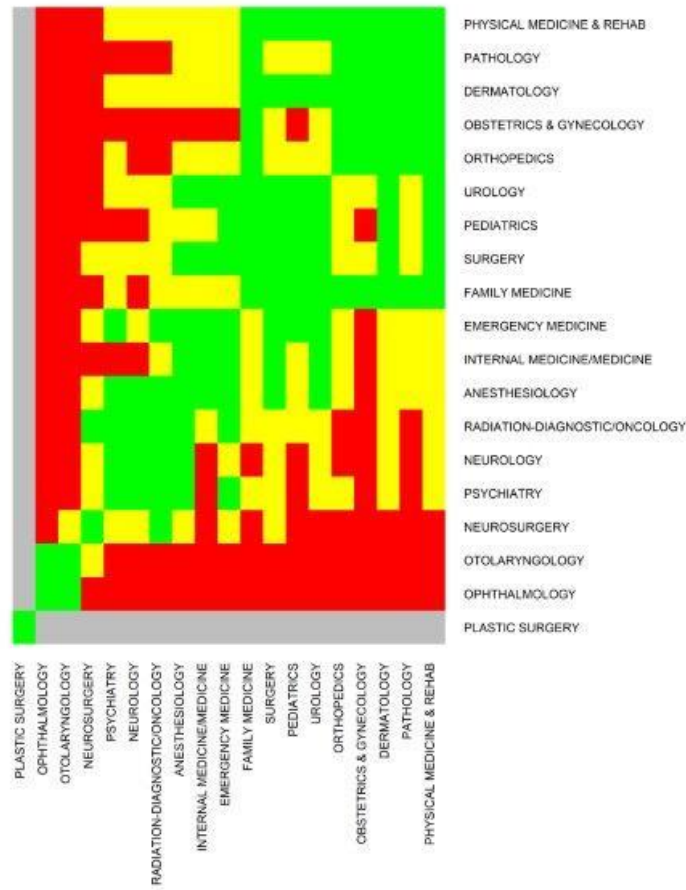

Supplement: bmjopen-2021-058191supp008.pdf [file bmjopen-2021-058191supp008.pdf]

R01 grant dollar amount comparisons P-values

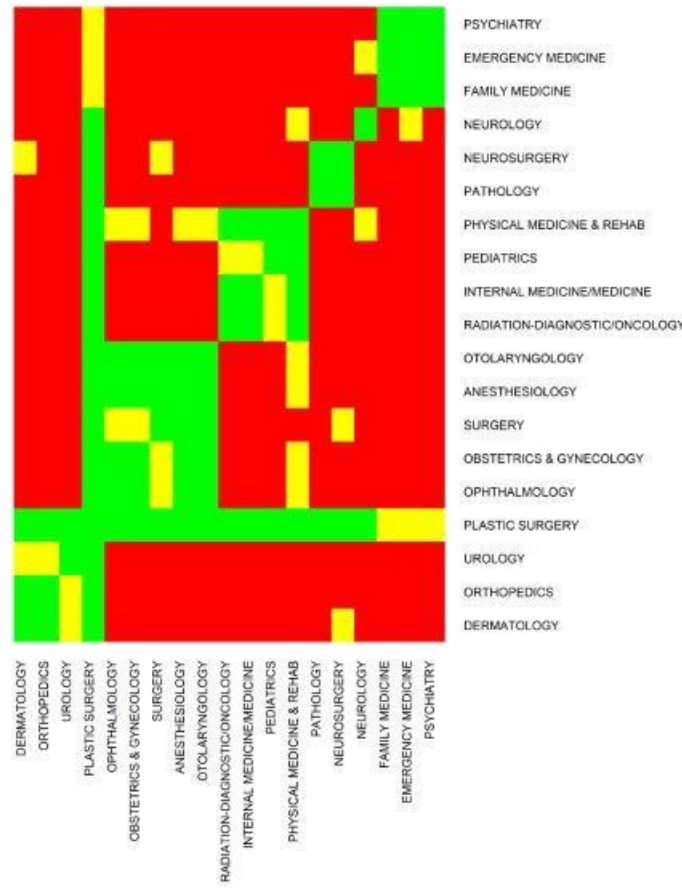

Supplement: bmjopen-2021-058191supp009.pdf [file bmjopen-2021-058191supp009.pdf]

R03 grant dollar amount comparisons P-values

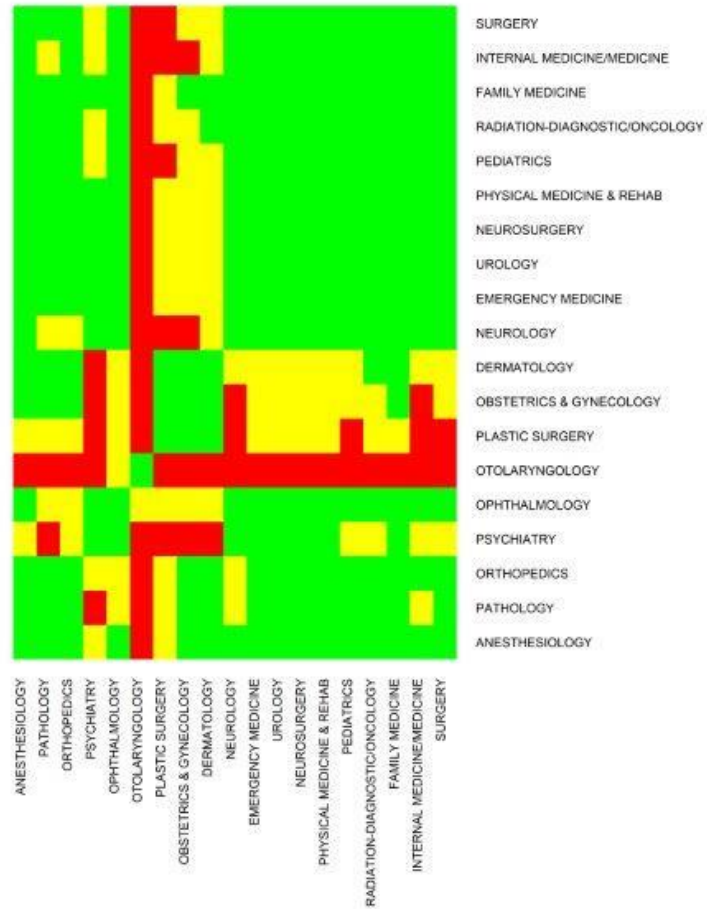

Supplement: bmjopen-2021-058191supp010.pdf [file bmjopen-2021-058191supp010.pdf]

**R21 grant dollar amount comparisons P-values**

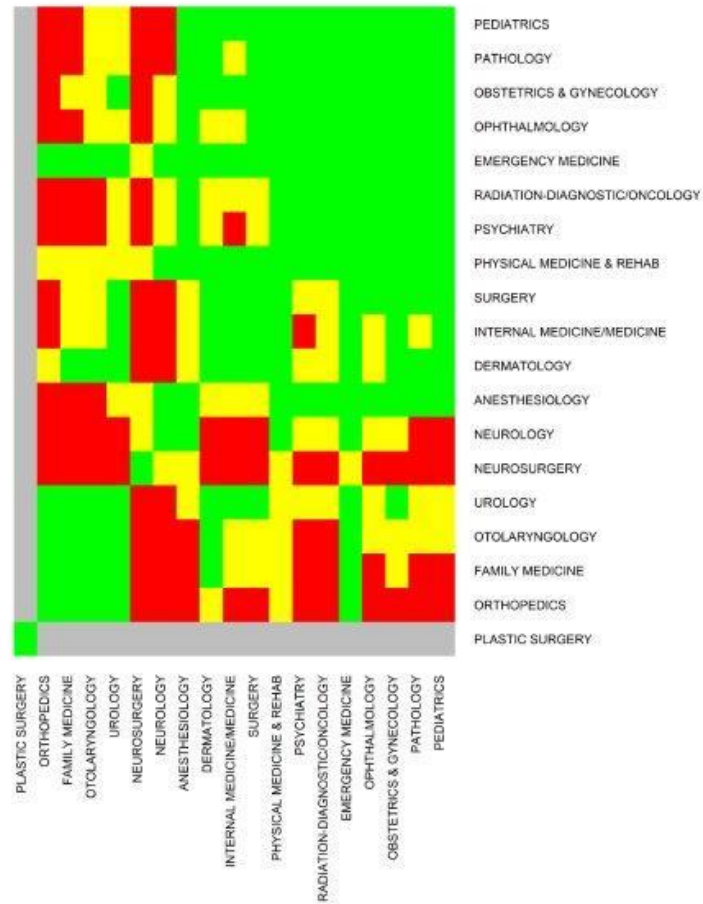

Supplement: bmjopen-2021-058191supp011.pdf [file bmjopen-2021-058191supp011.pdf]

**P30 grant dollar amount comparisons P-values**

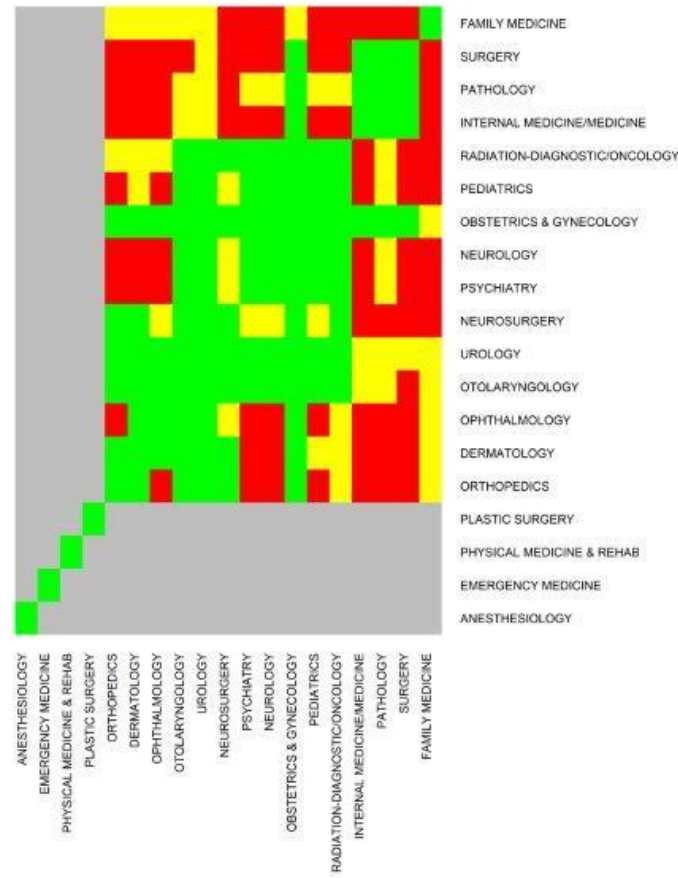

Supplement: bmjopen-2021-058191supp012.pdf [file bmjopen-2021-058191supp012.pdf]

U01 grant dollar amount comparisons P-values

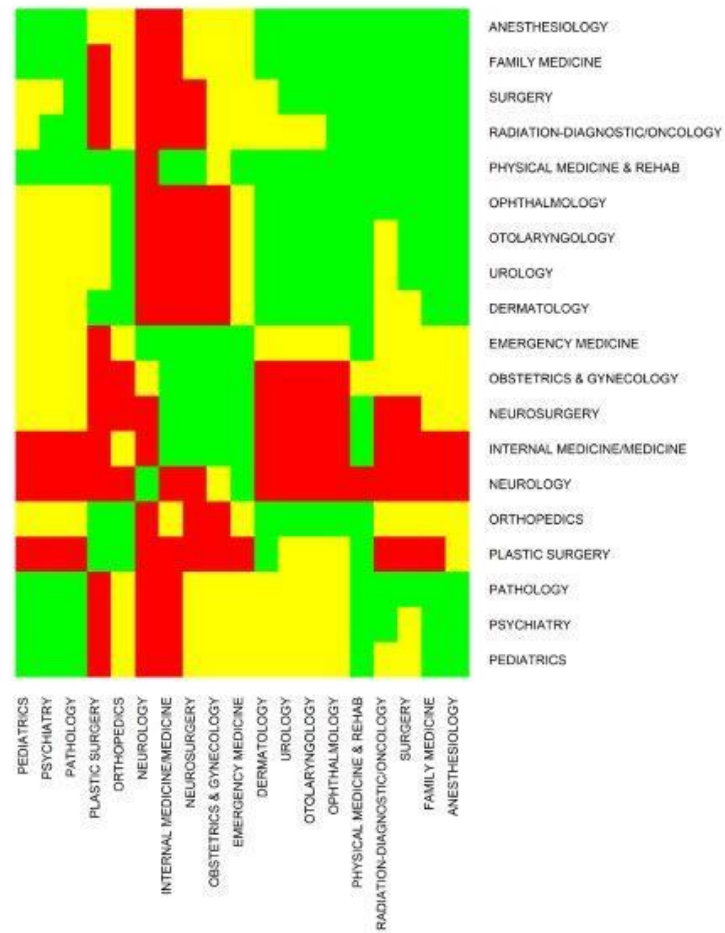

Supplement: bmjopen-2021-058191supp013.pdf [file bmjopen-2021-058191supp013.pdf]
